# Supplementary material for: CD44 Depletion in Glioblastoma Cells Suppresses Growth and Stemness and Induces Senescence
Source: Cancers (Basel). 2022 Jul 31;14(15):3747. doi: 10.3390/cancers14153747 (PMC9367353; doi:10.3390/cancers14153747)
Supplement: Supplementary file 1 [file cancers-14-03747-s001.zip]

Archive with 6 entries (6 files):
- cancers-1805721-original-images.pdf
- Proofreading supplementary.pdf
- Table S1.pdf
- Table S2_Filtered_DEGs_and_Common_DEGs_All_samples.xlsx
- Table S3_Hallmarks_Lists_CD44KO_vs_Parental.xlsx
- Table S4_Hallmarks_DAPT_vs_Parental.xlsx
