# Supplementary material for: CD44 Depletion in Glioblastoma Cells Suppresses Growth and Stemness and Induces Senescence
Source: Cancers (Basel). 2022 Jul 31;14(15):3747. doi: 10.3390/cancers14153747 (PMC9367353; doi:10.3390/cancers14153747)
Supplement: Supplementary file 1 [file cancers-14-03747-s001.zip › Proofreading supplementary.pdf]

# Supplementary Materials: CD44 Depletion in Glioblastoma Cells Suppresses Growth and Stemness and Induces Senescence

Constantinos Kolliopoulos, Mohamad Moustafa Ali, Casimiro Castillejo-Lopez, Carl-Henrik Heldin and Paraskevi Heldin

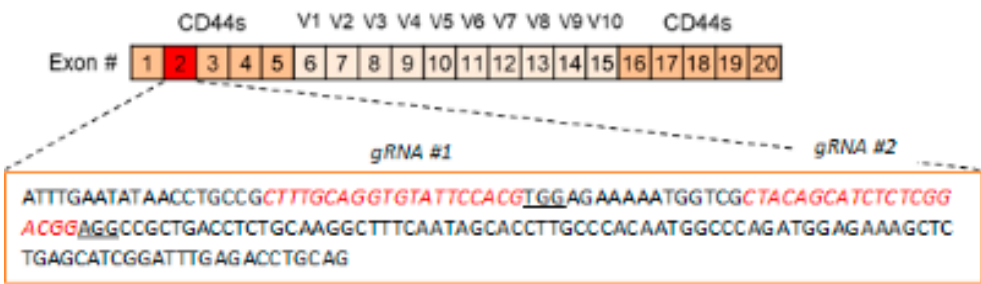

**Figure S1.** Representation of gRNAs targeting CD44. Coding region of CD44 is shown; constant exons generating CD44s are depicted with orange and variable (V) exons giving rise to CD44v are demonstrated with light orange. Exon #2 (red), was targeted with two gRNAs represented in italics followed by the PAM sequence, which is underlined. #, number.

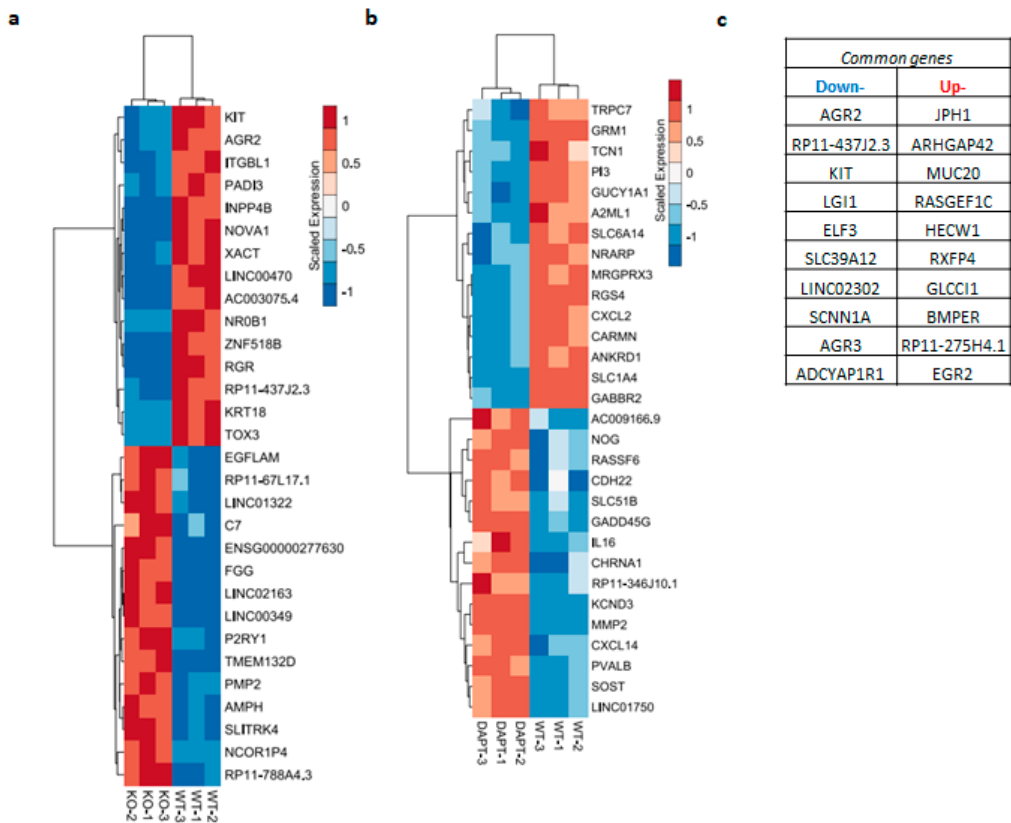

**Figure S2.** Inhibition of CD44 cleavage partially reproduces CD44 depletion in sphere-like conditions. (a,b), Heatmaps of relative expression values of the top 15 down- or upregulated genes of CD44 KO (a) or parental U251MG cells treated with the  $\gamma$ -secretase inhibitor DAPT (b) compared to control U251MG cells are shown. (c), Table with the top 10 common down or upregulated genes when parental U251MG cells are compared with either parental U251MG DAPT-treated or CD44 KO cells. Cells were grown in low attachment conditions.

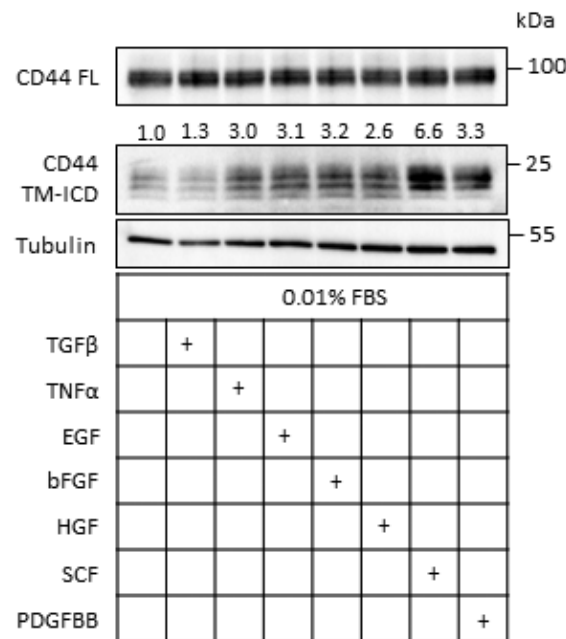

**Figure S3.** SCF and PDGF-BB potently induce CD44 cleavage in U251MG. Immunoblotting analysis of full-length (FL) and cleavage products (transmembrane and intracellular domains, TM-ICD) of CD44 in U251MG cells, after treatment for 24 h with the indicated growth factors/cytokines (all at a final concentration of 10 ng/mL). Uncropped immunoblots are shown in Figure S10. +, presence of the indicated factor.

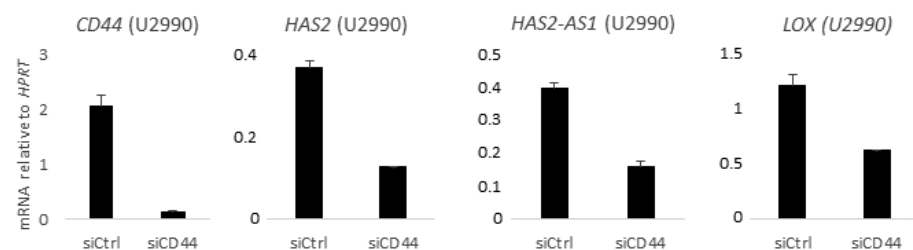

**Figure S4.** siRNA-mediated CD44 knockdown recapitulates CD44 knockout-mediated gene expression in U2990 cells. mRNA levels of *CD44*, *HAS2*, *HAS2-AS1* and *LOX* mRNAs were quantified by real-time qPCR after normalization to *TBP* in U2990 cells transfected with an siRNA targeting CD44 or with non-targeting scrambled siRNAs. Cells were grown in sphere-like conditions. One representative experiment out of two is demonstrated.

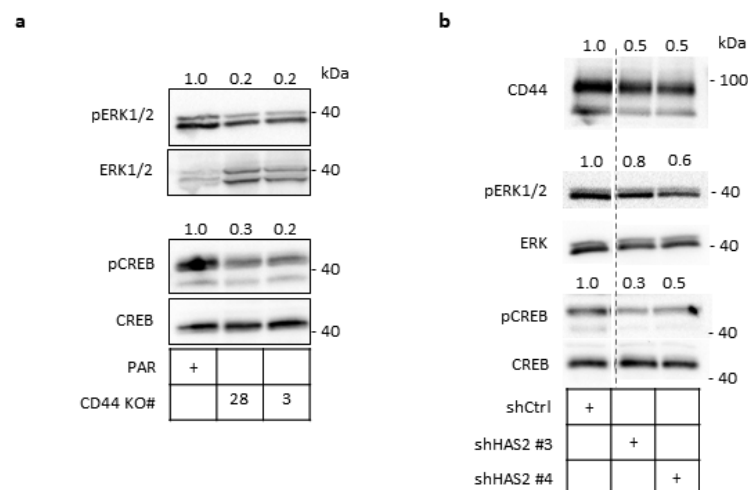

**Figure S5.** Perturbation of ERK1/2 MAPK and CREB signaling pathways in CD44 KO cells or U251MG cells stably transfected with shHAS2. (a,b), Immunoblotting analysis of full-length (FL) of

CD44, p-ERK1/2, ERK1/2, p-CREB and CREB levels in either CD44 KO clones (a) or shHAS2 stably transfected (b) U251MG cells, when cultured in non-adherent condition. Quantification of the immunoreactive bands was performed by ImageJ after normalizing to total levels of the corresponding phosphorylated proteins or total ERK1/2 levels in the case of CD44 (b), and shown as fold difference compared to the respective control. Uncropped immunoblots are shown in Figure S11.

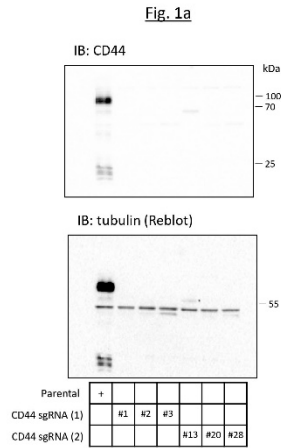

**Figure S6.** Uncropped Western Blot images for Figure 1a. #, number; +, presence of the indicated cell line.

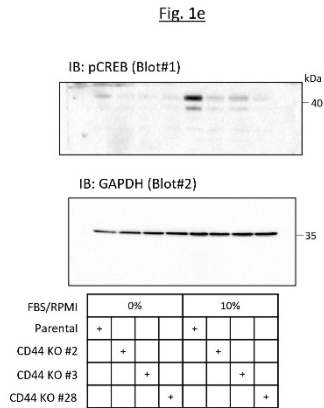

**Figure S7.** Uncropped Western Blot images for Figure 1e. +, presence of the indicated cell line.

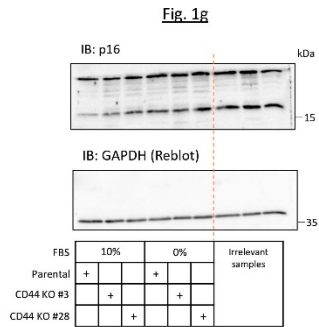

**Figure S8.** Uncropped Western Blot images for Figure 1g. +, presence of the indicated cell line.

Fig. 3c

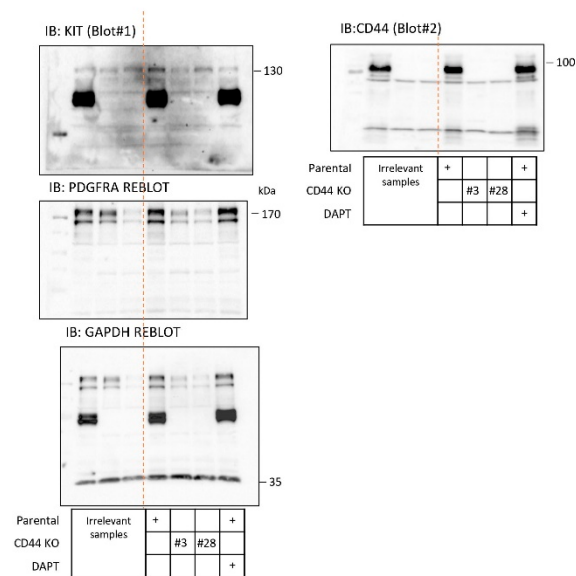

**Figure S9.** Uncropped Western Blot images for Figure 3c. #, number; +, presence of the indicated cell line or compound.

Fig. S3

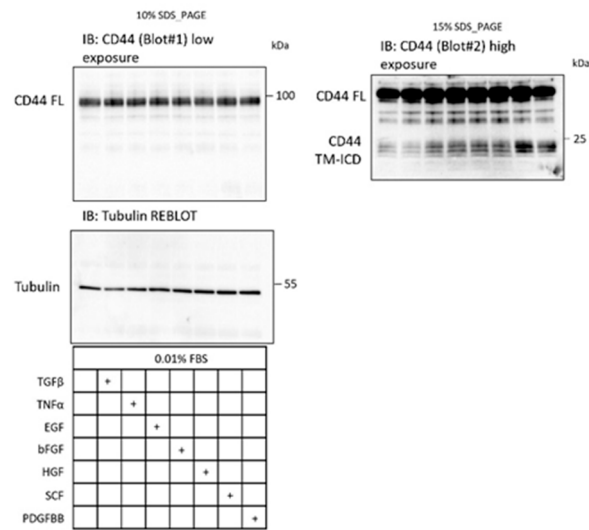

**Figure S10.** Uncropped Western Blot images for Figure S3. +, presence of the indicated factor.

**Fig. S5**

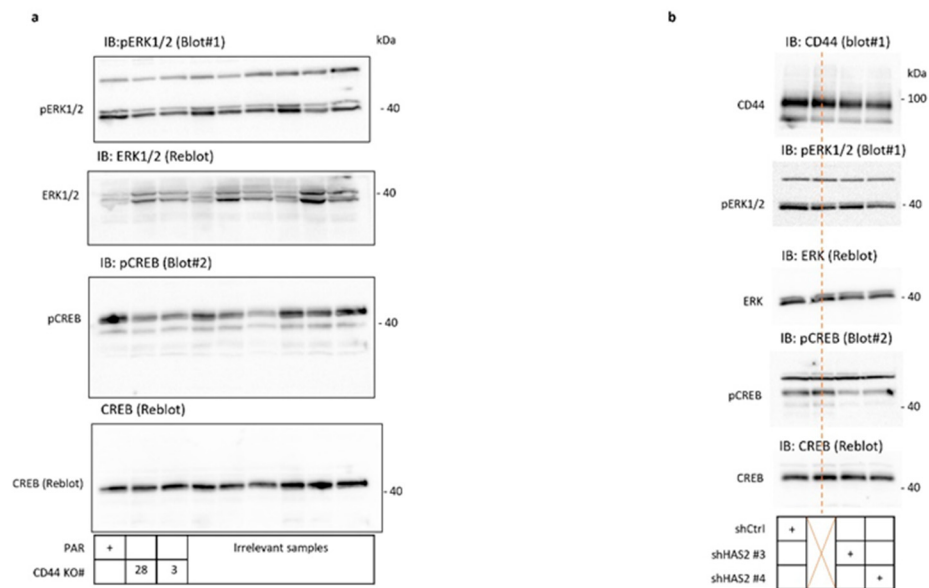

**Figure S11.** Uncropped Western Blot images for Figure S5. +, presence of the indicated factor.

**Table S1.** Specific gene signatures (hallmarks) CD44 KO vs Parental and DAPT vs Parental.

**Table S2. Complete** Filtered\_DEGs\_and\_Common\_DEGs\_All\_samples.

**Table S3. Complete** Hallmarks\_Lists\_CD44KO\_vs\_Parental.

**Table S4.** Complete Hallmarks\_DAPT\_vs\_Parental.

**Table S1.** is provided separately attached as a PDF file.

**Table S2–S4.** are provided separately attached as Excel files.
