# Supplementary material for: CD44 Depletion in Glioblastoma Cells Suppresses Growth and Stemness and Induces Senescence
Source: Cancers (Basel). 2022 Jul 31;14(15):3747. doi: 10.3390/cancers14153747 (PMC9367353; doi:10.3390/cancers14153747)
Supplement: Supplementary file 1 [file cancers-14-03747-s001.zip › Table S1.pdf]

Specific gene signatures (hallmarks) CD44 KO vs Parental and DAPT vs Parental

| <i>Parental vs CD44 KO</i> |                                   | ES    | NES   | NOMp  |
|----------------------------|-----------------------------------|-------|-------|-------|
| 1                          | Estrogen Receptor Early           | -0.58 | -1.81 | 0.000 |
| 2                          | Hypoxia                           | -0.57 | -1.80 | 0.000 |
| 3                          | Estrogen Repsonse Late            | -0.54 | -1.68 | 0.000 |
| 4                          | Reactive Oxygen Species           | -0.61 | -1.57 | 0.007 |
| 5                          | Glycolysis                        | -0.50 | -1.57 | 0.000 |
| 6                          | IL6/JAK/STAT3 Signaling           | -0.54 | -1.52 | 0.005 |
| 7                          | G2M Checkpoint                    | -0.48 | -1.51 | 0.000 |
| 8                          | Epithelial Mesenchymal Transition | -0.47 | -1.46 | 0.002 |

| <i>Parental vs DAPT</i> |                           | ES    | NES   | NOMp  |
|-------------------------|---------------------------|-------|-------|-------|
| 1                       | E2F Targets               | -0.81 | -2.74 | 0.000 |
| 2                       | G2M Checkpoint            | -0.77 | -2.63 | 0.000 |
| 3                       | MTORC1 Signaling          | -0.69 | -2.32 | 0.000 |
| 4                       | Glycolysis                | -0.66 | -2.25 | 0.000 |
| 5                       | Hypoxia                   | -0.65 | -2.20 | 0.000 |
| 6                       | Myc Targets               | -0.63 | -2.14 | 0.000 |
| 7                       | TNFα Signaling via NFκB   | -0.61 | -2.08 | 0.000 |
| 8                       | Mitotic Spindle           | -0.59 | -2.00 | 0.000 |
| 9                       | Estrogen Repsonse Late    | -0.58 | -1.98 | 0.000 |
| 10                      | Oxidative Phosphorylation | -0.58 | -1.96 | 0.000 |
| 11                      | UV Response Up            | -0.58 | -1.89 | 0.000 |
| 12                      | Cholesterol Homeostasis   | -0.63 | -1.88 | 0.000 |
| 13                      | Inflammatory Response     | -0.55 | -1.87 | 0.000 |
| 14                      | Interferon α Response     | -0.60 | -1.84 | 0.000 |
| 15                      | Estrogen Repsonse Early   | -0.52 | -1.77 | 0.000 |
| 16                      | UV Response Down          | -0.54 | -1.76 | 0.000 |
| 17                      | IL6/JAK/STAT3 Signaling   | -0.56 | -1.73 | 0.000 |
| 18                      | Unfolded Protein Response | -0.55 | -1.72 | 0.000 |
| 19                      | IL2/STAT5 Signaling       | -0.50 | -1.70 | 0.000 |
| 20                      | Angiogenesis              | -0.65 | -1.69 | 0.006 |
| 21                      | Androgen Response         | -0.55 | -1.69 | 0.000 |
| 22                      | Adipogenesis              | -0.50 | -1.68 | 0.000 |
| 23                      | Reactive Oxygen Species   | -0.60 | -1.67 | 0.000 |

**Table S1.** Gene signatures in U251MG cells grown in spheres. Specific gene signatures (hallmarks) upon CD44 KO in U251MG cells or treatment of parental U251MG cells with DAPT, compared with parental control cells, are shown.
