# Supplementary material for: CD44 Depletion in Glioblastoma Cells Suppresses Growth and Stemness and Induces Senescence
Source: Cancers (Basel). 2022 Jul 31;14(15):3747. doi: 10.3390/cancers14153747 (PMC9367353; doi:10.3390/cancers14153747)
Supplement: Supplementary file 1 [file cancers-14-03747-s001.zip › Table S2_Filtered_DEGs_and_Common_DEGs_All_samples.xlsx]

## Sheet: Filtered_DEGs_KO_vs_Ctrl
GeneID	GeneSymbol	baseMean	log2FoldChange	lfcSE	stat	pvalue	padj	Chromosome	Strand	CPM_Par_DMSO_1	CPM_Par_DMSO_2	CPM_Par_DMSO_3	CPM_CD44_KO_1	CPM_CD44_KO_2	CPM_CD44_KO_3
ENSG00000026508.20	CD44	8940.61	-4.41427	0.0618009	-71.4273	0	0	chr11:35138882-35232402	+	17496.5	16699.8	17044.2	794.484	805.576	803.079
ENSG00000079215.15	SLC1A3	2762.21	-3.59587	0.0780902	-46.0476	0	0	chr5:36596588-36688334	+	5087.65	5038.23	5182.02	381.587	458.2	425.572
ENSG00000104368.19	PLAT	17793.9	2.51534	0.0651989	38.5795	0	0	chr8:42174718-42207709	-	5150.51	5048.86	5692.8	31227.5	28538.8	31104.8
ENSG00000112276.14	BVES	8565.34	-3.46631	0.0702726	-49.3267	0	0	chr6:105096822-105137157	-	14648.5	16298.7	16179.9	1500.91	1314.07	1449.95
ENSG00000133048.13	CHI3L1	2166.01	-4.84892	0.101264	-47.884	0	0	chr1:203178931-203186704	-	4007.87	4423.34	4128.23	163.398	122	151.203
ENSG00000133083.15	DCLK1	2503.36	-3.63704	0.0797395	-45.6116	0	0	chr13:35768652-36131382	-	4698.32	4369.09	4835.31	359.083	381.833	376.506
ENSG00000137558.9	PI15	2164.55	-4.21223	0.0987887	-42.6388	0	0	chr8:74824534-74855029	+	3714.86	4156.32	4451.49	246.564	219.787	198.267
ENSG00000168497.5	CAVIN2	1466.14	-3.82304	0.0979618	-39.0259	0	0	chr2:191834310-191847088	-	2881.45	2822.3	2512.88	196.664	199.298	184.248
ENSG00000169116.11	PARM1	1445.88	5.64837	0.135391	41.7191	0	0	chr4:74933095-75050115	+	61.8467	39.3611	67.3877	2889.3	2758.51	2858.84
ENSG00000178695.6	KCTD12	2962.68	-2.99928	0.0740805	-40.4868	0	0	chr13:76880175-76886405	-	4986.26	5204.18	5609.78	645.763	675.193	654.88
ENSG00000185634.12	SHC4	3254.97	3.56459	0.0778659	45.7785	0	0	chr15:48823741-48963919	-	522.148	478.717	520.546	6259.99	6168.94	5579.5
ENSG00000235750.10	KIAA0040	1155.55	4.37915	0.115883	37.7893	0	0	chr1:175156986-175192999	-	106.457	94.6795	116.219	2214.18	2345.02	2056.76
ENSG00000156804.7	FBXO32	3170.09	-3.15792	0.0858375	-36.7895	2.71403e-296	4.60884e-293	chr8:123497889-123541206	-	5740.59	6298.85	5064.82	669.245	621.178	625.841
ENSG00000148680.16	HTR7	1156.81	-3.91716	0.109876	-35.6508	2.28754e-278	3.60712e-275	chr10:90740823-90858039	-	2124.08	2197.84	2188.64	167.311	150.871	112.151
ENSG00000198721.13	ECI2	4251.4	2.25622	0.0667025	33.8251	8.42351e-251	1.23972e-247	chr6:4115693-4135597	-	1396.11	1446.79	1571.4	7070.13	6828.3	7195.67
ENSG00000182463.16	TSHZ2	1238.45	-3.40362	0.101669	-33.4774	1.029e-245	1.41976e-242	chr20:52972358-53495330	+	2262.98	2232.95	2294.11	181.988	252.383	206.277
ENSG00000106366.9	SERPINE1	1934.79	2.60535	0.0796171	32.7235	7.2361e-235	9.39671e-232	chr7:101127104-101139247	+	541.412	520.205	576.214	3232.73	3526.84	3211.32
ENSG00000206579.9	XKR4	1385.44	-3.0668	0.093978	-32.6332	1.38626e-233	1.70017e-230	chr8:55102028-55542054	+	2427.23	2662.73	2337.08	311.14	310.123	264.355
ENSG00000189143.10	CLDN4	702.383	-4.83656	0.148302	-32.613	2.68449e-233	3.1191e-230	chr7:73799542-73832690	+	1368.74	1379.77	1323.34	38.1587	51.2216	53.0713
ENSG00000187955.12	COL14A1	5286.93	-2.4377	0.075404	-32.3286	2.77551e-229	3.06361e-226	chr8:120059780-120373573	+	8784.26	8799.88	9194.03	1476.45	1633.5	1833.46
ENSG00000046653.15	GPM6B	22369.2	-2.3985	0.0742127	-32.3193	3.74872e-229	3.94079e-226	chrX:13770939-13938638	-	35530.4	35070.8	42216	7312.78	6756.59	7328.85
ENSG00000164199.18	ADGRV1	1311.39	4.13402	0.128589	32.149	9.10816e-227	9.13962e-224	chr5:90529344-91164437	+	136.874	141.487	145.518	2951.92	2057.24	2435.27
ENSG00000123560.14	PLP1	3206.2	3.23243	0.101106	31.9706	2.79327e-224	2.68105e-221	chrX:103773718-103792619	+	534.315	569.141	745.171	6183.67	5260.92	5943.99
ENSG00000116106.12	EPHA4	1582.16	-3.05459	0.0959127	-31.8476	1.41888e-222	1.30513e-219	chr2:221418027-221574202	-	2626.96	2873.36	2971.9	377.674	290.566	352.474
ENSG00000003436.16	TFPI	946.188	3.4017	0.108168	31.4483	4.42834e-217	3.9104e-214	chr2:187464230-187565760	-	165.263	177.657	148.448	1860.97	1686.59	1638.2
ENSG00000085377.15	PREP	2504.41	-2.48869	0.0793881	-31.3485	1.02104e-215	8.66944e-213	chr6:105273218-105454062	-	4064.65	4281.85	4407.55	676.094	783.224	813.093
ENSG00000170961.7	HAS2	1195.3	-3.21774	0.104862	-30.6854	8.90133e-207	7.27799e-204	chr8:121612116-121641440	-	2226.48	2325.5	1923.97	205.47	243.07	247.332
ENSG00000178031.18	ADAMTSL1	809.989	-4.51535	0.149872	-30.1281	2.07575e-199	1.63658e-196	chr9:17906563-18910950	+	1690.14	1707.42	1258.88	68.49	68.9163	66.0888
ENSG00000118432.13	CNR1	3187.12	-2.64126	0.088481	-29.8512	8.47754e-196	6.45346e-193	chr6:88139864-88166347	-	5716.26	5936.09	4829.45	804.269	956.446	880.183
ENSG00000067048.17	DDX3Y	563.657	-4.44494	0.149563	-29.7195	4.29499e-194	3.16054e-191	chrY:12904108-12920478	+	1087.89	1067.01	1078.2	48.9214	42.8399	57.0767
ENSG00000151388.11	ADAMTS12	749.591	6.11157	0.20625	29.6318	5.81938e-193	4.14415e-190	chr5:33523535-33892019	-	18.2498	26.5954	19.5327	1495.04	1328.97	1609.16
ENSG00000205542.11	TMSB4X	101665	-1.56567	0.0533635	-29.3398	3.22211e-189	2.22285e-186	chrX:12975110-12977227	+	146978	155797	153184	52817.5	49781.8	51433.1
ENSG00000204262.14	COL5A2	2799.29	2.74822	0.0938707	29.2766	2.05905e-188	1.37744e-185	chr2:189031898-189225312	-	741.147	742.543	692.433	4453.81	4485.15	5680.64
ENSG00000106070.20	GRB10	11473.1	1.63594	0.0560573	29.1834	3.15196e-187	2.04655e-184	chr7:50590063-50793462	-	5543.9	5546.73	5666.43	16985.5	16979.5	18116.4
ENSG00000135905.20	DOCK10	9244.98	-2.40945	0.0832007	-28.9595	2.13236e-184	1.34497e-181	chr2:224765090-225042468	-	14424.5	14194.5	18063.8	2901.04	2993.2	2892.89
ENSG00000102172.16	SMS	2415.8	-2.14179	0.0762727	-28.0807	1.68618e-173	1.034e-170	chrX:21940709-21994837	+	4013.95	3855.26	3947.55	986.256	845.621	846.137
ENSG00000008513.16	ST3GAL1	2798.8	-2.12117	0.0757603	-27.9984	1.69839e-172	1.01334e-169	chr8:133454848-133571940	-	4257.28	4679.72	4718.12	1045.94	1119.42	972.307
ENSG00000038427.16	VCAN	3369.42	-2.05214	0.074168	-27.6688	1.65712e-168	9.62701e-166	chr5:83471618-83582303	+	5241.76	5902.04	5144.9	1278.81	1272.16	1376.85
ENSG00000154678.18	PDE1C	7371.35	-1.73464	0.0630753	-27.5012	1.70072e-166	9.62694e-164	chr7:31751179-32428131	-	11259.1	11892.4	10858.2	3540.93	3442.09	3235.35
ENSG00000135046.14	ANXA1	18604.4	-1.76913	0.0651019	-27.1747	1.29223e-162	7.13181e-160	chr9:73151865-73170393	+	28572.2	29107	28625.1	8696.28	7659.95	8966.05
ENSG00000105894.12	PTN	36089	-1.52073	0.0562535	-27.0335	5.97674e-161	3.21811e-158	chr7:137227341-137343774	-	55101.4	52684.4	52786.1	19357.2	17724.5	18880.4
ENSG00000101871.16	MID1	1495.62	-2.08207	0.0786692	-26.4662	2.37582e-154	1.24877e-151	chrX:10445310-10833654	-	2421.15	2349.97	2487.49	578.251	541.086	595.801
ENSG00000123496.8	IL13RA2	544.611	3.68275	0.139849	26.3338	7.87914e-153	4.04511e-150	chrX:115003975-115019977	-	75.0271	85.1052	76.1774	1122.26	964.828	944.269
ENSG00000188042.8	ARL4C	5657.04	-2.11927	0.0814106	-26.0319	2.15912e-149	1.08329e-146	chr2:234493041-234497081	-	10095.2	9242.42	8254.51	1927.5	2241.64	2180.93
ENSG00000078269.15	SYNJ2	7448.32	1.64161	0.0630944	26.0183	3.07799e-149	1.50999e-146	chr6:157981863-158099176	+	3368.11	3697.82	3780.55	11034.7	11183.1	11625.6
ENSG00000075223.14	SEMA3C	15262.9	-1.86348	0.0719688	-25.8929	8.00164e-148	3.84009e-145	chr7:80742538-80922359	-	25660.3	25023	21152.9	6547.65	6540.53	6652.94
ENSG00000124486.14	USP9X	8404.73	-1.41328	0.0551733	-25.6152	1.03199e-144	4.84726e-142	chrX:41085445-41236579	+	11987.1	12128.6	12546.8	4614.27	4508.43	4643.24
ENSG00000147852.17	VLDLR	1871.27	-1.93025	0.0775434	-24.8925	8.9619e-137	4.12173e-134	chr9:2621182-2660056	+	2934.17	3170.17	2790.24	764.153	801.85	767.031
ENSG00000112893.10	MAN2A1	1926.83	1.86248	0.0750092	24.8301	4.24767e-136	1.9137e-133	chr5:109689927-109869625	+	848.618	840.414	804.746	3202.4	2903.8	2960.98
ENSG00000198796.7	ALPK2	2059.36	-1.85523	0.0758316	-24.4652	3.46919e-132	1.53172e-129	chr18:58481247-58629091	-	3081.18	3458.46	3140.85	879.608	869.835	926.245
ENSG00000184226.15	PCDH9	1348.9	1.98968	0.0814477	24.429	8.42482e-132	3.64679e-129	chr13:66302834-67230445	-	527.218	582.97	518.592	2191.68	2167.14	2105.83
ENSG00000065923.10	SLC9A7	3144.26	-1.83079	0.0750488	-24.3947	1.94828e-131	8.2712e-129	chrX:46599251-46759118	-	5304.62	4898.87	4522.79	1434.38	1381.12	1323.78
ENSG00000169860.7	P2RY1	956.784	8.13598	0.33481	24.3003	1.9454e-130	8.10316e-128	chr3:152835131-152841439	+	7.09716	5.31907	7.81307	2067.42	1755.5	1897.55
ENSG00000100234.12	TIMP3	988.066	-2.25062	0.0929157	-24.2221	1.30103e-129	5.3188e-127	chr22:32801705-32863041	+	1613.08	1749.98	1536.24	332.666	352.963	343.462
ENSG00000070961.16	ATP2B1	1196.03	2.07163	0.0858204	24.1391	9.7123e-129	3.89834e-126	chr12:89588049-89709300	-	429.885	475.525	473.667	2020.46	1856.08	1920.58
ENSG00000134853.12	PDGFRA	1163.58	-2.35585	0.0980126	-24.0362	1.16488e-127	4.59213e-125	chr4:54229280-54298245	+	1959.83	1960.61	1919.08	362.019	334.337	445.599
ENSG00000135373.13	EHF	873.195	-2.28432	0.0956516	-23.8817	4.74509e-126	1.83776e-123	chr11:34621093-34663288	+	1397.13	1522.32	1427.84	309.184	307.329	275.37
ENSG00000115380.20	EFEMP1	1857.21	1.78863	0.0751069	23.8145	2.36379e-125	8.99706e-123	chr2:55865967-55924139	-	825.299	882.966	794.003	2778.74	2977.37	2884.88
ENSG00000103740.10	ACSBG1	737.906	3.03414	0.127931	23.7169	2.4115e-124	9.0231e-122	chr15:78167468-78245688	-	149.04	159.572	172.864	1096.82	1367.15	1481.99
ENSG00000170456.16	DENND5B	2296.57	-1.65514	0.0698662	-23.6901	4.56384e-124	1.67919e-121	chr12:31382226-31591136	-	3487.75	3531.86	3438.73	1060.62	1085.9	1174.58
ENSG00000146555.19	SDK1	1485.48	-1.79865	0.0772872	-23.2723	8.46113e-120	3.0621e-117	chr7:3301252-4269000	+	2398.84	2319.12	2205.24	652.612	675.193	661.89
ENSG00000077942.19	FBLN1	1176.36	-2.15059	0.092481	-23.2544	1.28366e-119	4.57065e-117	chr22:45502238-45601135	+	1884.8	1843.59	2032.37	381.587	458.2	457.615
ENSG00000092421.17	SEMA6A	365.922	4.01148	0.172826	23.2111	3.51688e-119	1.23236e-116	chr5:116443555-116574823	-	31.4303	51.0631	45.9018	660.439	734.797	671.903
ENSG00000130508.11	PXDN	6030.27	1.46211	0.0633072	23.0955	5.14148e-118	1.77349e-115	chr2:1631887-1744852	-	3037.59	3192.51	3404.54	8590.61	8877.16	9079.2
ENSG00000135842.17	NIBAN1	335.073	4.29466	0.187254	22.9349	2.08258e-116	7.07308e-114	chr1:184790724-184974508	-	34.4719	25.5316	37.1121	618.367	676.125	618.832
ENSG00000130055.14	GDPD2	328.314	-4.27456	0.188646	-22.6592	1.13343e-113	3.79116e-111	chrX:70423031-70433390	+	620.495	631.906	621.139	39.1372	38.1833	19.0256
ENSG00000102452.18	NALCN	370.274	-3.29361	0.146905	-22.4201	2.5088e-111	8.2663e-109	chr13:101053776-101416508	-	685.383	635.097	695.363	67.5116	65.1911	73.0983
ENSG00000182253.15	SYNM	7611.85	-1.64041	0.0732481	-22.3953	4.37396e-111	1.41999e-108	chr15:99098217-99135593	+	11164.9	11276.4	12137.6	3315.9	3769.91	4006.39
ENSG00000152377.14	SPOCK1	1161.83	-2.81023	0.125513	-22.39	4.92511e-111	1.57575e-108	chr5:136975298-137598379	-	1896.97	1830.83	2372.24	302.335	228.169	340.458
ENSG00000044524.11	EPHA3	5699.19	1.39112	0.0623225	22.3213	2.29501e-110	7.23782e-108	chr3:89107621-89482134	+	3250.5	3114.85	3073.47	8707.04	8005.47	8043.81
ENSG00000034677.13	RNF19A	5317.11	1.45127	0.0650351	22.3152	2.63009e-110	8.17773e-108	chr8:100257060-100336218	-	2701.99	2909.53	2930.88	8007.46	7347.04	8005.76
ENSG00000205221.12	VIT	1354.08	-2.1174	0.0951615	-22.2506	1.11353e-109	3.41419e-107	chr2:36696690-36814792	+	2034.86	2070.18	2497.25	525.416	487.071	509.685
ENSG00000074527.13	NTN4	410.09	-3.20606	0.144447	-22.1955	3.79601e-109	1.14795e-106	chr12:95657807-95791189	-	747.23	810.627	662.157	82.188	78.2293	80.1077
ENSG00000107372.13	ZFAND5	9054.12	-1.45246	0.0656486	-22.1247	1.82868e-108	5.45539e-106	chr9:72351413-72365235	-	12919.9	12716.8	14149.5	5146.54	4707.73	4684.3
ENSG00000169855.20	ROBO1	1397.07	1.82878	0.0826678	22.122	1.94066e-108	5.71226e-106	chr3:78597239-79767998	-	559.662	636.161	645.555	2110.47	2241.64	2188.94
ENSG00000169302.16	STK32A	3348.34	1.73379	0.0784286	22.1067	2.7274e-108	7.92237e-106	chr5:147234963-147387855	+	1413.35	1701.04	1530.38	5491.92	4886.54	5066.81
ENSG00000152527.14	PLEKHH2	1693.48	1.57824	0.0719061	21.9486	8.92175e-107	2.55788e-104	chr2:43637260-43767987	+	834.424	854.243	860.414	2590.88	2527.55	2493.35
ENSG00000049323.16	LTBP1	10734.3	-1.26343	0.0576051	-21.9326	1.26999e-106	3.59441e-104	chr2:32946953-33399509	+	14864.5	14666.8	15934.7	6224.76	6297.46	6417.63
ENSG00000129824.16	RPS4Y1	283.337	-4.74561	0.2178	-21.7888	2.96146e-105	8.2756e-103	chrY:2841602-2932000	+	554.593	551.056	533.242	23.4823	18.626	19.0256
ENSG00000162599.17	NFIA	419.739	3.00246	0.137926	21.7686	4.59999e-105	1.26937e-102	chr1:60865259-61462788	+	82.1243	91.4881	105.476	716.21	731.071	792.065
ENSG00000173598.14	NUDT4	2458.23	1.97662	0.0909528	21.7324	1.01318e-104	2.76135e-102	chr12:93377883-93408146	+	920.603	914.881	1151.45	4191.59	3638.59	3932.29
ENSG00000241743.4	XACT	678.515	-7.94222	0.365761	-21.7142	1.50621e-104	4.05502e-102	chrX:113616300-114059289	-	1161.91	1463.81	1428.81	4.89214	4.65651	7.00942
ENSG00000115461.5	IGFBP5	83907.6	1.77283	0.0816692	21.7074	1.74672e-104	4.64585e-102	chr2:216672105-216695549	-	44064.3	35176.1	34733	130592	135634	123247
ENSG00000185942.13	NKAIN3	659.071	-2.30273	0.106133	-21.6966	2.21e-104	5.8081e-102	chr8:62248591-63014000	+	1027.06	1105.3	1155.36	215.254	215.131	236.318
ENSG00000171951.5	SCG2	15933.7	-2.06008	0.0952951	-21.6179	1.21797e-103	3.16328e-101	chr2:223596940-223602361	-	27332.2	25414.5	24363.1	7180.69	5025.3	6286.45
ENSG00000182240.16	BACE2	1363.27	-1.73613	0.0803568	-21.6053	1.60189e-103	4.112e-101	chr21:41167801-41282530	+	2201.13	2027.63	2062.65	601.734	655.636	630.848
ENSG00000114805.18	PLCH1	671.717	-2.28469	0.105916	-21.5708	3.37776e-103	8.57098e-101	chr3:155375580-155745071	-	1116.28	1139.35	1087.97	213.297	216.062	257.346
ENSG00000129514.8	FOXA1	330.244	3.63662	0.169804	21.4166	9.35757e-102	2.34747e-99	chr14:37589552-37596059	-	53.7357	48.9355	44.9251	614.453	668.674	550.74
ENSG00000164300.17	SERINC5	7526.62	-1.32454	0.0618503	-21.4153	9.63244e-102	2.38928e-99	chr5:80111651-80256048	-	11180.1	10281.8	10812.3	4327.59	4466.52	4091.5
ENSG00000135048.14	CEMIP2	2864.77	-1.67783	0.078518	-21.3687	2.61429e-101	6.41257e-99	chr9:71683366-71816690	-	4029.16	4512.7	4553.06	1287.61	1314.07	1492.01
ENSG00000174607.11	UGT8	292.539	4.84817	0.227285	21.3308	5.87697e-101	1.42571e-98	chr4:114598770-114678225	+	16.2221	15.9572	26.3691	612.496	549.468	534.719
ENSG00000047457.14	CP	2690.25	-4.73155	0.221864	-21.3264	6.46557e-101	1.55145e-98	chr3:149162410-149221829	-	6238.41	4439.3	4878.28	239.715	181.604	164.221
ENSG00000085982.14	USP40	390.03	-2.833	0.133807	-21.1723	1.71981e-99	4.08243e-97	chr2:233475520-233566782	-	709.716	673.395	668.994	92.9507	94.9927	100.135
ENSG00000171105.14	INSR	1998.31	1.69245	0.0801534	21.1151	5.77295e-99	1.35578e-96	chr19:7112255-7294414	-	938.853	873.392	1019.61	3090.86	2862.82	3204.31
ENSG00000067992.16	PDK3	2497.1	-1.53814	0.0728882	-21.1027	7.50826e-99	1.74476e-96	chrX:24465270-24550466	+	3935.88	3448.89	3760.04	1314.03	1273.09	1250.68
ENSG00000143226.15	FCGR2A	567.95	2.38522	0.11423	20.8808	8.00703e-97	1.84128e-94	chr1:161505430-161524013	+	165.263	177.657	204.116	986.256	920.126	954.283
ENSG00000124225.16	PMEPA1	1977.14	1.6782	0.080529	20.8397	1.89099e-96	4.30366e-94	chr20:57648392-57711536	-	1014.89	889.349	919.989	3092.81	3158.04	2787.75
ENSG00000184009.13	ACTG1	97786.1	-1.33652	0.0646314	-20.679	5.35012e-95	1.2052e-92	chr17:81509413-81523847	-	149963	134289	136040	51801	58156	56467.9
ENSG00000114374.13	USP9Y	260.518	-4.50483	0.218829	-20.5861	3.65632e-94	8.15322e-92	chrY:12537650-12860839	+	473.482	489.355	534.218	30.3313	17.6947	18.0242
ENSG00000150636.17	CCDC102B	1146.24	1.75187	0.0856093	20.4636	4.54749e-93	1.0039e-90	chr18:68715209-69055189	+	493.76	512.759	567.424	1820.86	1731.29	1751.35
ENSG00000145794.17	MEGF10	304.943	3.54304	0.173523	20.4183	1.15012e-92	2.51388e-90	chr5:127290796-127465737	+	34.4719	59.5736	50.7849	544.985	555.056	584.786
ENSG00000136603.14	SKIL	1028.68	1.81049	0.0893324	20.2669	2.52273e-91	5.45997e-89	chr3:170357678-170396835	+	434.955	457.44	476.597	1703.44	1524.54	1575.12
ENSG00000160862.13	AZGP1	449.447	-2.88128	0.142329	-20.2438	4.03098e-91	8.6396e-89	chr7:99966720-99976042	-	836.451	838.286	700.246	89.037	128.52	104.14
ENSG00000099998.19	GGT5	400.101	-2.78724	0.137734	-20.2364	4.68604e-91	9.94703e-89	chr22:24219654-24245108	-	696.536	671.267	729.545	102.735	116.413	84.1131
ENSG00000265972.6	TXNIP	22753.5	-1.23349	0.0611256	-20.1797	1.47751e-90	3.10642e-88	chr1:145992435-145996579	-	31056.2	32446.3	32283.6	13107	14610.3	13017.5
ENSG00000137801.11	THBS1	1943.35	-1.73179	0.0858472	-20.1729	1.69271e-90	3.52532e-88	chr15:39581079-39599466	+	3058.88	3046.77	2856.65	778.829	966.691	952.28
ENSG00000129003.19	VPS13C	6083.92	1.50498	0.0746259	20.167	1.90815e-90	3.93684e-88	chr15:61852389-62060473	-	3155.2	3030.81	3323.48	9723.63	8079.04	9191.35
ENSG00000166106.4	ADAMTS15	2902.37	1.69277	0.0842433	20.0938	8.36434e-90	1.70973e-87	chr11:130448645-130476645	+	1240.99	1376.58	1496.2	4002.75	4670.48	4627.22
ENSG00000136068.16	FLNB	16117.9	-1.61989	0.0809988	-19.9989	5.62862e-89	1.13998e-86	chr3:58008398-58172251	+	27615.1	21497.6	23854.3	7474.22	8302.55	7963.7
ENSG00000259070.7	LINC00639	306.982	-4.18537	0.209704	-19.9585	1.26527e-88	2.53927e-86	chr14:38738155-38948273	-	639.759	664.884	441.438	34.245	33.5268	28.0377
ENSG00000185565.12	LSAMP	250.854	4.30872	0.216388	19.912	3.20003e-88	6.36431e-86	chr3:115802363-117139389	-	27.3748	26.5954	18.556	465.732	445.162	521.701
ENSG00000067141.17	NEO1	451.019	2.65311	0.133936	19.8087	2.50496e-87	4.93745e-85	chr15:73051710-73305205	+	112.541	127.658	130.869	748.498	713.377	873.174
ENSG00000074800.16	ENO1	72918.7	-1.16349	0.0590054	-19.7184	1.49972e-86	2.9299e-84	chr1:8861000-8879190	-	103189	100191	99098	42129.2	47578.3	45326.9
ENSG00000125257.16	ABCC4	2153.39	-1.85076	0.0940989	-19.6682	4.03779e-86	7.81914e-84	chr13:95019835-95301475	-	2971.68	3321.23	3822.54	1022.46	891.255	891.198
ENSG00000113140.11	SPARC	307627	1.00788	0.0512639	19.6606	4.69109e-86	9.00525e-84	chr5:151661096-151686975	-	201833	200580	210602	402613	410877	419259
ENSG00000125249.7	RAP2A	1975.51	-1.68031	0.0855002	-19.6527	5.48423e-86	1.04371e-83	chr13:97434169-97469128	+	2800.34	2864.85	3368.41	985.278	895.912	938.261
ENSG00000109819.9	PPARGC1A	248.106	-3.61196	0.183853	-19.6459	6.2644e-86	1.18199e-83	chr4:23755041-23904089	-	445.093	465.951	464.877	36.2019	34.4581	42.0565
ENSG00000108231.14	LGI1	400.013	-7.09537	0.366638	-19.3525	1.94194e-83	3.63307e-81	chr10:93757840-93806272	+	643.814	819.137	919.989	4.89214	10.2443	2.00269
ENSG00000143502.16	SUSD4	1414.33	1.48877	0.0771054	19.3082	4.58047e-83	8.49736e-81	chr1:223220819-223364233	-	711.744	731.905	785.213	2097.75	2066.56	2092.81
ENSG00000104267.10	CA2	290.664	-3.85691	0.199954	-19.289	6.64697e-83	1.22282e-80	chr8:85463968-85481493	+	472.468	492.546	666.064	43.0509	29.8016	40.0538
ENSG00000157227.14	MMP14	2145.74	1.96334	0.101822	19.2821	7.59074e-83	1.3849e-80	chr14:22836560-22849041	+	970.284	918.072	740.288	3061.5	3852.79	3331.48
ENSG00000115963.14	RND3	1786.42	-1.40009	0.0729484	-19.1929	4.23935e-82	7.67115e-80	chr2:150468195-150539011	-	2564.1	2661.66	2548.04	1009.74	1006.74	928.248
ENSG00000204767.4	INSYN2B	673.329	-2.16127	0.112682	-19.1803	5.41175e-82	9.71299e-80	chr5:169861303-169980495	-	974.339	1143.6	1183.68	226.995	244.001	267.359
ENSG00000196730.13	DAPK1	518.596	-2.56645	0.134042	-19.1467	1.0313e-81	1.83604e-79	chr9:87497228-87708634	+	1042.27	808.499	811.582	136.98	162.046	150.202
ENSG00000092820.18	EZR	4722.31	-1.32043	0.0690904	-19.1116	2.02314e-81	3.57304e-79	chr6:158765741-158819368	-	6809.22	6887.14	6536.61	2458.79	2842.33	2799.76
ENSG00000185985.11	SLITRK2	283.713	-3.98954	0.209386	-19.0535	6.14349e-81	1.07638e-78	chrX:145817829-145829856	+	477.538	448.93	674.854	34.245	31.6642	35.0471
ENSG00000104783.14	KCNN4	2222.8	-2.07487	0.109098	-19.0185	1.19931e-80	2.08472e-78	chr19:43766533-43781257	-	3690.52	3840.37	3248.28	670.224	987.179	900.21
ENSG00000108387.16	SEPTIN4	1200.47	-1.56784	0.0826522	-18.9692	3.06663e-80	5.28898e-78	chr17:58520250-58544368	-	1790.51	1819.12	1776.5	558.683	621.178	636.856
ENSG00000165092.13	ALDH1A1	225.765	4.23935	0.224832	18.8556	2.64219e-79	4.52163e-77	chr9:72900671-73080442	-	14.1943	25.5316	28.3224	459.862	405.116	421.567
ENSG00000133019.12	CHRM3	292.061	-3.09585	0.164314	-18.8411	3.47946e-79	5.90866e-77	chr1:239386565-239915452	+	562.704	474.461	531.289	60.6626	52.1529	71.0956
ENSG00000106278.12	PTPRZ1	34337.3	1.16122	0.0617206	18.8141	5.78296e-79	9.7454e-77	chr7:121873089-122062036	+	20544.3	21194.4	21917.6	47842.2	44209.8	50315.6
ENSG00000107984.10	DKK1	3418.81	-1.88575	0.100335	-18.7946	8.35592e-79	1.39747e-76	chr10:52314281-52318042	+	5852.12	5948.85	4344.07	1410.89	1558.07	1398.88
ENSG00000065618.21	COL17A1	220.386	-4.57014	0.243457	-18.7719	1.2822e-78	2.12825e-76	chr10:104031286-104085880	-	478.552	392.548	397.49	21.5254	11.1756	21.0283
ENSG00000118257.17	NRP2	7554.93	1.1779	0.0636564	18.5041	1.91482e-76	3.15459e-74	chr2:205681990-205798133	+	4856.49	4644.62	4393.87	10018.1	11001.5	10415
ENSG00000167552.15	TUBA1A	25960.1	-1.10352	0.0597428	-18.4712	3.52351e-76	5.76186e-74	chr12:49184686-49189080	-	37591.6	35303.8	33398.9	16101	16915.2	16450.1
ENSG00000187957.8	DNER	341.226	-2.80518	0.151912	-18.4658	3.88987e-76	6.31417e-74	chr2:229357629-229714555	-	653.953	622.332	514.686	86.1017	79.1606	91.1225
ENSG00000123104.12	ITPR2	6406.76	1.38873	0.0754082	18.4161	9.75758e-76	1.57232e-73	chr12:26335352-26833194	-	3352.9	3311.66	3957.32	9559.25	8748.64	9510.78
ENSG00000108846.16	ABCC3	3063.69	-1.77432	0.0973544	-18.2254	3.24483e-74	5.19079e-72	chr17:50634777-50692253	+	4480.34	5298.86	4445.64	1166.29	1558.07	1432.93
ENSG00000104998.4	IL27RA	898.229	1.66782	0.0915476	18.2181	3.71116e-74	5.89407e-72	chr19:14031762-14053218	+	441.038	436.164	413.116	1290.55	1361.56	1446.94
ENSG00000170962.13	PDGFD	266.482	-3.65834	0.201014	-18.1995	5.21045e-74	8.21613e-72	chr11:103907189-104164379	-	526.204	563.822	391.63	47.943	37.252	32.0431
ENSG00000147119.4	CHST7	880.504	-1.67586	0.0922618	-18.1642	9.91777e-74	1.5528e-71	chrX:46573765-46598496	+	1331.22	1328.7	1364.36	419.746	454.475	384.517
ENSG00000076356.7	PLXNA2	378.118	-2.69966	0.148693	-18.1559	1.15272e-73	1.79207e-71	chr1:208022242-208244384	-	554.593	668.076	743.218	107.627	94.0614	101.136
ENSG00000153714.6	LURAP1L	393.256	2.52185	0.139155	18.1226	2.11242e-73	3.26111e-71	chr9:12775020-12823060	+	124.707	95.7433	128.916	634.022	728.278	647.871
ENSG00000069849.11	ATP1B3	3274.46	1.2749	0.0704489	18.0968	3.37987e-73	5.18153e-71	chr3:141876124-141926549	+	1895.96	1866.99	1981.59	4982.16	4552.2	4367.87
ENSG00000145934.16	TENM2	5267.36	-1.30408	0.0721427	-18.0764	4.89203e-73	7.44803e-71	chr5:167284799-168264157	+	7454.05	7932.87	7107.94	2764.06	3145.94	3199.3
ENSG00000185305.11	ARL15	448.384	2.41376	0.133564	18.072	5.29751e-73	8.01012e-71	chr5:53883942-54310582	-	148.027	137.232	139.659	814.053	647.254	804.081
ENSG00000104870.13	FCGRT	266.349	-2.99138	0.165746	-18.048	8.18547e-73	1.22927e-70	chr19:49506816-49526428	+	510.996	479.78	428.742	62.6194	55.8781	60.0808
ENSG00000159167.12	STC1	23917.6	1.29488	0.0719812	17.9892	2.36938e-72	3.53421e-70	chr8:23841929-23854806	-	13619.5	12697.7	15234.5	32713.8	36238.8	33001.4
ENSG00000141639.12	MAPK4	213.757	-4.42567	0.247306	-17.8956	1.27679e-71	1.89171e-69	chr18:50560087-50731826	+	386.288	353.186	486.363	14.6764	27.0077	15.0202
ENSG00000127329.16	PTPRB	755.57	-1.90951	0.106786	-17.8816	1.64108e-71	2.41524e-69	chr12:70515870-70637440	-	1321.09	1160.62	1098.71	287.658	326.887	338.455
ENSG00000134824.14	FADS2	2151.59	-1.50399	0.0845555	-17.7871	8.90317e-71	1.30163e-68	chr11:61792980-61867354	+	3143.03	2984	3417.24	996.041	1184.62	1184.59
ENSG00000162733.19	DDR2	3910.32	-1.17624	0.0662017	-17.7676	1.26012e-70	1.83016e-68	chr1:162631373-162787405	+	5285.36	5241.42	5737.72	2291.48	2458.64	2447.29
ENSG00000139865.16	TTC6	200.537	3.6931	0.208221	17.7364	2.19506e-70	3.1672e-68	chr14:37595847-38041442	+	26.3609	26.5954	33.2055	373.76	368.795	374.503
ENSG00000167754.13	KLK5	208.781	-5.44345	0.307111	-17.7247	2.70426e-70	3.87657e-68	chr19:50943303-50953093	-	418.733	453.185	352.565	5.87057	9.31301	13.0175
ENSG00000163629.13	PTPN13	2547.17	1.30776	0.073882	17.7007	4.14134e-70	5.89833e-68	chr4:86594315-86815171	+	1329.2	1558.49	1509.88	3566.37	3618.11	3700.97
ENSG00000008394.13	MGST1	3304.59	-1.30371	0.0736556	-17.7001	4.1837e-70	5.92047e-68	chr12:16347142-16609259	+	4366.78	4579.72	5164.44	1893.26	1914.76	1908.57
ENSG00000171522.6	PTGER4	230.563	3.24479	0.183783	17.6555	9.22928e-70	1.29774e-67	chr5:40679915-40693735	+	39.5413	41.4888	50.7849	405.07	447.956	398.536
ENSG00000101911.13	PRPS2	1350.33	-1.44753	0.0821	-17.6313	1.41693e-69	1.97976e-67	chrX:12791355-12824222	+	1981.12	1927.63	2019.68	784.7	718.965	669.9
ENSG00000119326.15	CTNNAL1	1793.02	-1.75371	0.0994938	-17.6263	1.54774e-69	2.14892e-67	chr9:108942569-109013522	-	2573.23	3251.02	2473.81	871.78	810.232	778.046
ENSG00000166450.13	PRTG	518.8	-2.00041	0.11355	-17.6169	1.82696e-69	2.52075e-67	chr15:55611544-55743152	-	819.215	817.01	853.578	207.427	186.26	229.308
ENSG00000173905.9	GOLIM4	1310.55	1.38154	0.0784913	17.6012	2.41129e-69	3.30631e-67	chr3:168008689-168095924	-	695.522	723.394	761.774	1931.42	1901.72	1849.49
ENSG00000198300.14	PEG3	194.886	-3.85312	0.219146	-17.5824	3.35819e-69	4.57626e-67	chr19:56810077-56840728	-	372.094	328.719	392.607	28.3744	20.4886	27.0363
ENSG00000155792.10	DEPTOR	765.225	-1.70414	0.0969249	-17.582	3.3832e-69	4.58206e-67	chr8:119873717-120050918	+	1196.38	1140.41	1175.87	339.515	343.65	395.532
ENSG00000168502.17	MTCL1	2177.67	-1.30773	0.0749109	-17.4571	3.0417e-68	4.06962e-66	chr18:8705661-8832778	+	3137.96	3094.64	3074.44	1139.87	1336.42	1282.72
ENSG00000183853.18	KIRREL1	3757.63	-1.17319	0.0673708	-17.4139	6.47579e-68	8.61203e-66	chr1:157993273-158100262	+	4891.97	5474.39	5253.31	2215.16	2334.77	2376.19
ENSG00000147010.18	SH3KBP1	804.317	-1.66027	0.0956739	-17.3534	1.85938e-67	2.45794e-65	chrX:19533977-19887600	-	1191.31	1178.71	1295.99	358.105	403.253	398.536
ENSG00000139926.16	FRMD6	2461.47	1.61934	0.0934363	17.331	2.74536e-67	3.60753e-65	chr14:51489100-51730727	+	1073.7	1179.77	1372.17	3973.4	3313.57	3856.18
ENSG00000125430.9	HS3ST3B1	1514.81	1.32831	0.0767111	17.3158	3.57694e-67	4.67246e-65	chr17:14301081-14349404	+	863.826	904.242	821.349	2188.75	2224.88	2085.8
ENSG00000159228.13	CBR1	1183.3	1.38228	0.0802681	17.2209	1.85219e-66	2.40524e-64	chr21:36069941-36073166	+	628.606	649.991	689.503	1729.86	1700.56	1701.29
ENSG00000184564.11	SLITRK6	1555.26	-1.61602	0.0941234	-17.1692	4.51784e-66	5.8325e-64	chr13:85792790-85806683	-	2631.02	2136.14	2268.72	842.427	728.278	724.975
ENSG00000152049.6	KCNE4	4066.54	-1.25732	0.073508	-17.1045	1.37319e-65	1.76247e-63	chr2:223051814-223198399	+	5846.03	6058.42	5299.21	2221.03	2518.24	2456.3
ENSG00000171617.15	ENC1	9241.69	-1.14709	0.0671369	-17.0858	1.89409e-65	2.41699e-63	chr5:74627406-74641424	-	11643.4	13636	12921.8	5590.74	5771.27	5886.91
ENSG00000156687.11	UNC5D	213.439	-3.09891	0.181773	-17.0482	3.60271e-65	4.57089e-63	chr8:35235475-35796550	+	402.511	369.144	375.027	43.0509	42.8399	48.0646
ENSG00000068078.20	FGFR3	838.352	-2.19801	0.129041	-17.0334	4.64048e-65	5.8539e-63	chr4:1793293-1808872	+	1289.66	1447.85	1393.66	260.262	388.353	250.337
ENSG00000146376.11	ARHGAP18	2045.84	-1.34056	0.0787614	-17.0205	5.78614e-65	7.25766e-63	chr6:129576132-129710177	-	2689.82	3193.57	2917.2	1173.14	1168.78	1132.52
ENSG00000005893.16	LAMP2	16740.5	-1.02829	0.060655	-16.9532	1.82402e-64	2.26219e-62	chrX:120426148-120469365	-	23840.4	22602.9	20955.6	11072.9	11037.8	10933.7
ENSG00000103222.20	ABCC1	1339.56	-1.56058	0.0920524	-16.9532	1.82323e-64	2.26219e-62	chr16:15949138-16143257	+	1923.33	2114.86	1964.99	593.906	754.354	685.922
ENSG00000129521.15	EGLN3	871.333	-2.29394	0.135835	-16.8877	5.53988e-64	6.83231e-62	chr14:33924227-34462774	-	1802.68	1126.58	1413.19	310.162	298.016	277.373
ENSG00000079931.15	MOXD1	1196.31	-1.72564	0.102434	-16.8463	1.11725e-63	1.37024e-61	chr6:132296055-132401475	-	2025.73	1938.27	1547.96	547.92	579.269	538.724
ENSG00000056558.11	TRAF1	234.245	3.07219	0.182624	16.8224	1.67105e-63	2.03813e-61	chr9:120902393-120929173	-	45.6246	47.8717	55.6681	368.868	422.811	464.625
ENSG00000078114.19	NEBL	2026.61	-1.24335	0.0739679	-16.8093	2.08591e-63	2.53014e-61	chr10:20779973-21293011	-	2976.75	2737.2	2835.17	1244.56	1240.49	1125.51
ENSG00000166147.15	FBN1	243.681	2.95999	0.176281	16.7913	2.82725e-63	3.41062e-61	chr15:48408313-48645721	-	65.9022	43.6164	56.6447	400.177	432.124	463.623
ENSG00000101265.16	RASSF2	2744.75	-1.08439	0.0646325	-16.7778	3.54565e-63	4.23164e-61	chr20:4780023-4823608	-	3791.91	3663.78	3734.65	1792.48	1691.24	1794.41
ENSG00000147862.17	NFIB	2217	-1.13836	0.0678491	-16.7778	3.54618e-63	4.23164e-61	chr9:14081843-14398983	-	2930.11	3089.32	3127.18	1366.87	1374.6	1413.9
ENSG00000120549.18	KIAA1217	409.707	-2.11041	0.125797	-16.7763	3.6362e-63	4.31573e-61	chr10:23694746-24547848	+	655.981	649.991	689.503	155.57	135.97	171.23
ENSG00000005469.12	CROT	1285.48	1.38835	0.0832357	16.6797	1.83998e-62	2.17217e-60	chr7:87345664-87399794	+	742.16	704.245	685.597	1995.99	1796.48	1788.4
ENSG00000150995.21	ITPR1	3034.31	-1.26335	0.0759784	-16.6277	4.39117e-62	5.15635e-60	chr3:4493345-4847506	+	4644.59	3892.5	4314.77	1718.12	1837.46	1798.42
ENSG00000099994.11	SUSD2	174.346	-4.08894	0.246878	-16.5626	1.29861e-61	1.51683e-59	chr22:24181487-24189106	+	291.998	320.208	376.004	13.698	25.1451	19.0256
ENSG00000012817.16	KDM5D	160.345	-4.90722	0.297015	-16.5218	2.55525e-61	2.95339e-59	chrY:19703865-19744939	-	312.275	304.251	314.476	8.80586	10.2443	12.0162
ENSG00000184500.16	PROS1	2008.47	1.19022	0.0721369	16.4995	3.70084e-61	4.2552e-59	chr3:93873051-93980003	-	1290.67	1163.81	1216.89	2836.47	2695.19	2847.83
ENSG00000155850.8	SLC26A2	1577.73	1.46734	0.0890365	16.4802	5.08808e-61	5.81992e-59	chr5:149960758-149993455	+	786.771	852.116	875.063	2579.14	2111.26	2262.04
ENSG00000163297.18	ANTXR2	201.251	3.15144	0.191429	16.4627	6.79538e-61	7.73272e-59	chr4:79901146-80125454	-	36.4997	46.8078	39.0653	377.674	366.001	341.459
ENSG00000188488.14	SERPINA5	2499.38	-1.18593	0.0721225	-16.4433	9.36532e-61	1.06025e-58	chr14:94561442-94593118	+	3349.86	3360.59	3706.32	1472.54	1506.85	1600.15
ENSG00000131002.12	TXLNGY	162.535	-4.3174	0.263451	-16.3879	2.33493e-60	2.6299e-58	chrY:19567313-19606274	+	327.483	290.421	310.569	8.80586	14.9008	23.031
ENSG00000061918.14	GUCY1B1	760.06	1.88047	0.115485	16.2833	1.2973e-59	1.45376e-57	chr4:155758992-155807811	+	282.873	295.74	394.56	1233.8	1221.87	1131.52
ENSG00000157150.5	TIMP4	454.12	2.05101	0.125969	16.2819	1.32778e-59	1.48041e-57	chr3:12153068-12158912	-	170.332	157.445	201.186	759.261	671.468	765.028
ENSG00000144724.20	PTPRG	1297.12	-1.32093	0.0812161	-16.2644	1.76481e-59	1.95779e-57	chr3:61561569-62297609	+	1807.75	1866.99	1883.93	740.671	793.469	689.927
ENSG00000165091.18	TMC1	191.84	-3.72062	0.2292	-16.2331	2.94358e-59	3.24913e-57	chr9:72521608-72838297	+	323.428	329.783	417.022	18.5901	38.1833	24.0323
ENSG00000008277.15	ADAM22	352.544	2.18272	0.134524	16.2255	3.33116e-59	3.65864e-57	chr7:87934143-88202889	+	139.915	130.849	111.336	597.82	561.575	573.771
ENSG00000196604.13	POTEF	157.359	-3.87908	0.240825	-16.1075	2.26003e-58	2.46992e-56	chr2:130073535-130129222	-	308.22	281.911	293.967	14.6764	22.3512	23.031
ENSG00000111913.20	RIPOR2	187.141	-3.58404	0.223985	-16.0012	1.25275e-57	1.36235e-55	chr6:24804282-25042170	-	289.97	407.441	338.892	35.2234	23.2825	28.0377
ENSG00000102317.18	RBM3	2008.59	-1.11131	0.0695445	-15.9799	1.76554e-57	1.9106e-55	chrX:48574449-48581162	+	2798.31	2753.15	2686.72	1327.73	1233.97	1251.68
ENSG00000116117.18	PARD3B	351.801	-2.10115	0.131496	-15.9788	1.79563e-57	1.93368e-55	chr2:204545475-205620162	+	557.634	577.651	576.214	128.174	122.932	148.199
ENSG00000150347.17	ARID5B	921.917	-1.52678	0.0957091	-15.9523	2.7457e-57	2.94243e-55	chr10:61901684-62096944	+	1338.32	1494.66	1273.53	447.142	472.17	505.68
ENSG00000007350.17	TKTL1	177.176	-5.90625	0.370716	-15.932	3.7982e-57	4.05068e-55	chrX:154295795-154330350	+	348.775	341.485	355.495	3.91372	8.38171	5.00673
ENSG00000101144.13	BMP7	555.33	-1.77915	0.111937	-15.8943	6.94323e-57	7.36917e-55	chr20:57168753-57266641	-	902.354	839.35	837.951	267.111	218.856	266.358
ENSG00000158352.17	SHROOM4	416.243	-1.95737	0.123223	-15.8848	8.07826e-57	8.53281e-55	chrX:50591642-50814302	-	624.55	714.883	646.531	178.074	160.184	173.233
ENSG00000047365.12	ARAP2	265.16	2.40633	0.151947	15.8366	1.7395e-56	1.82863e-54	chr4:35948221-36244514	-	87.1937	89.3604	76.1774	448.12	440.505	449.604
ENSG00000121879.6	PIK3CA	1585.56	1.18685	0.0751856	15.7856	3.91208e-56	4.07373e-54	chr3:179148114-179240093	+	930.742	986.156	986.4	2268.98	2100.08	2241.01
ENSG00000179431.7	FJX1	567.771	2.04062	0.130109	15.6839	1.94791e-55	1.99084e-53	chr11:35618460-35620865	+	214.943	242.55	209	1086.06	854.003	800.075
ENSG00000130707.18	ASS1	850.17	-1.89474	0.121003	-15.6587	2.89972e-55	2.94996e-53	chr9:130444961-130501274	+	1378.88	1190.41	1451.28	304.291	437.712	338.455
ENSG00000016391.11	CHDH	148.893	-4.50043	0.288045	-15.6241	4.99219e-55	5.05539e-53	chr3:53812335-53846419	-	258.539	326.591	270.527	6.849	15.8321	15.0202
ENSG00000026103.22	FAS	326.04	-2.11173	0.135387	-15.5977	7.5422e-55	7.60282e-53	chr10:88990531-89017059	+	535.329	555.311	498.083	129.153	119.207	119.16
ENSG00000172020.13	GAP43	745.787	1.70786	0.109715	15.5662	1.23462e-54	1.23888e-52	chr3:115623510-115721490	+	358.914	395.739	294.943	1143.78	1074.72	1206.62
ENSG00000156299.13	TIAM1	1638.14	-1.17767	0.0760051	-15.4946	3.77233e-54	3.76824e-52	chr21:31118416-31559977	-	2301.51	2382.94	2131.99	1000.93	1028.16	983.322
ENSG00000272398.6	CD24	182.061	-3.22195	0.20827	-15.47	5.52753e-54	5.49666e-52	chr6:106969831-106975627	-	342.692	337.229	306.663	47.943	29.8016	28.0377
ENSG00000110435.13	PDHX	2145.79	-1.04986	0.0678769	-15.4672	5.77818e-54	5.72014e-52	chr11:34915829-35020591	+	2800.34	2991.45	2889.86	1423.61	1387.64	1381.86
ENSG00000170421.12	KRT8	142.676	-4.60241	0.297929	-15.448	7.7801e-54	7.66757e-52	chr12:52897187-52949954	-	261.581	265.954	294.943	5.87057	17.6947	10.0135
ENSG00000146411.6	SLC2A12	1240.26	-1.21847	0.0790161	-15.4205	1.19097e-53	1.16853e-51	chr6:133987581-134052624	-	1741.85	1680.83	1782.36	725.994	778.568	731.984
ENSG00000154639.19	CXADR	3177.32	-1.07405	0.0697395	-15.4008	1.61597e-53	1.5785e-51	chr21:17513043-17593579	+	4408.35	4247.81	4268.86	2200.49	2035.82	1902.56
ENSG00000198121.14	LPAR1	289.578	-2.69365	0.175017	-15.3908	1.88761e-53	1.83572e-51	chr9:110873263-111038470	-	458.274	471.27	575.237	53.8136	84.7484	94.1265
ENSG00000171862.11	PTEN	3038.43	-1.12841	0.0735014	-15.3523	3.4189e-53	3.31033e-51	chr10:87863625-87971930	+	4231.94	3868.03	4408.52	2020.46	1895.2	1806.43
ENSG00000130741.11	EIF2S3	3465.79	-1.06576	0.0695558	-15.3223	5.42527e-53	5.23005e-51	chrX:24054946-24078810	+	4570.57	4546.74	4954.46	2392.26	2184.83	2145.88
ENSG00000183878.16	UTY	141.654	-5.08954	0.332321	-15.3151	6.05809e-53	5.81471e-51	chrY:13234577-13480673	-	277.803	260.635	287.13	4.89214	7.45041	12.0162
ENSG00000155816.21	FMN2	266.182	-2.45198	0.160278	-15.2983	7.85011e-53	7.50212e-51	chr1:240014348-240475187	+	423.802	464.887	461.948	65.5547	97.7866	83.1117
ENSG00000065150.21	IPO5	1758.66	-1.11994	0.0732187	-15.2958	8.15356e-53	7.75853e-51	chr13:97953658-98024296	+	2397.83	2330.82	2498.23	1142.8	1126.87	1055.42
ENSG00000101384.12	JAG1	12968.7	1.35085	0.0884064	15.28	1.03962e-52	9.85004e-51	chr20:10637684-10673999	-	6403.67	6820.12	8690.08	18537.3	18691.2	18670.1
ENSG00000165072.10	MAMDC2	444.464	-1.8378	0.120395	-15.2649	1.31119e-52	1.23701e-50	chr9:70043848-70226972	+	664.092	659.565	759.821	191.772	186.26	205.276
ENSG00000182621.18	PLCB1	424.631	-1.80375	0.118228	-15.2565	1.49054e-52	1.40022e-50	chr20:8077251-8968360	+	628.606	694.671	657.274	181.988	189.985	195.262
ENSG00000060718.22	COL11A1	2924.42	-1.30534	0.085677	-15.2356	2.05201e-52	1.9195e-50	chr1:102876467-103108872	-	4218.76	4025.47	4248.36	1454.92	1901.72	1697.28
ENSG00000150403.18	TMCO3	1279.3	-1.22912	0.0807345	-15.2242	2.44278e-52	2.27539e-50	chr13:113491021-113554590	+	1873.65	1755.29	1751.1	762.196	725.484	808.086
ENSG00000102804.15	TSC22D1	10473.2	1.03932	0.068321	15.2124	2.92761e-52	2.71554e-50	chr13:44432143-44577147	-	6789.96	6737.14	7039.57	15313.4	12879	14079.9
ENSG00000120875.9	DUSP4	933.668	-1.58536	0.104531	-15.1665	5.89543e-52	5.4455e-50	chr8:29333064-29350684	-	1424.5	1534.02	1244.23	458.883	517.803	422.568
ENSG00000165323.16	FAT3	209.17	-6.51541	0.429643	-15.1647	6.05679e-52	5.57123e-50	chr11:92224818-92896473	+	326.469	355.314	559.611	4.89214	3.7252	5.00673
ENSG00000169554.22	ZEB2	261.952	2.32456	0.153809	15.1133	1.32354e-51	1.21238e-49	chr2:144364364-144521057	-	96.3186	88.2966	77.154	416.811	453.544	439.591
ENSG00000131828.14	PDHA1	1697.28	-1.21755	0.080578	-15.1103	1.38574e-51	1.26411e-49	chrX:19343893-19361718	+	2163.62	2509.54	2448.42	977.45	1040.26	1044.4
ENSG00000102225.16	CDK16	1570.73	-1.10103	0.0731854	-15.0444	3.75585e-51	3.4121e-49	chrX:47217860-47229997	+	2205.19	2105.29	2117.34	963.752	1010.46	1022.37
ENSG00000179242.16	CDH4	2331.54	-1.28558	0.0857109	-14.9991	7.44726e-51	6.71044e-49	chr20:61252261-61940617	+	3158.24	3396.76	3365.48	1169.22	1482.63	1416.9
ENSG00000139946.10	PELI2	710.494	-1.52066	0.101399	-14.9967	7.71784e-51	6.92598e-49	chr14:56117814-56301524	+	1004.76	1015.94	1140.71	350.278	395.803	355.478
ENSG00000100345.22	MYH9	6299.18	-1.06412	0.0715379	-14.8749	4.79792e-50	4.27092e-48	chr22:36281280-36387967	-	8638.26	8453.07	8476.2	3628.01	4340.79	4258.72
ENSG00000188039.16	NWD1	374.272	-2.22175	0.149362	-14.875	4.79324e-50	4.27092e-48	chr19:16719847-16817963	+	708.702	538.29	602.583	113.498	157.39	125.168
ENSG00000109472.14	CPE	1147.54	1.33152	0.0898296	14.8228	1.04414e-49	9.22015e-48	chr4:165361194-165498547	+	693.494	668.076	596.723	1768.02	1561.79	1597.15
ENSG00000006468.14	ETV1	1076.25	1.26776	0.0855331	14.8218	1.05864e-49	9.31093e-48	chr7:13891229-13991425	-	632.661	649.991	612.349	1605.6	1425.82	1531.06
ENSG00000094755.17	GABRP	173.575	3.41351	0.230404	14.8153	1.16652e-49	1.02191e-47	chr5:170763350-170814047	+	27.3748	28.723	33.2055	279.831	393.94	278.374
ENSG00000167755.15	KLK6	130.104	-4.01102	0.271198	-14.79	1.69865e-49	1.48219e-47	chr19:50958631-50969673	-	265.637	232.975	236.345	11.7411	14.9008	19.0256
ENSG00000179869.15	ABCA13	2377	-1.10381	0.0747677	-14.7632	2.53024e-49	2.19912e-47	chr7:48171458-48647497	+	3122.75	3446.76	3164.29	1399.15	1572.97	1556.09
ENSG00000154856.13	APCDD1	726.973	-1.52846	0.103554	-14.76	2.65236e-49	2.29621e-47	chr18:10454635-10489949	+	1101.07	1118.07	1020.58	335.601	420.017	366.493
ENSG00000102007.11	PLP2	482.202	-1.6209	0.110051	-14.7286	4.2234e-49	3.62785e-47	chrX:49171898-49175235	+	716.813	707.437	758.844	237.758	230.031	242.326
ENSG00000003096.14	KLHL13	4679.57	-1.0121	0.0689249	-14.684	8.15699e-49	6.95265e-47	chrX:117897813-118117340	-	5914.98	6189.27	6666.5	2942.14	3275.39	3089.15
ENSG00000117595.12	IRF6	238.202	2.81326	0.191722	14.6737	9.50681e-49	8.07202e-47	chr1:209785617-209806175	-	54.7495	41.4888	81.0606	455.948	427.467	368.495
ENSG00000170522.10	ELOVL6	987.81	-1.30046	0.0886382	-14.6716	9.8055e-49	8.29372e-47	chr4:110045846-110199199	-	1311.96	1392.53	1510.85	564.553	580.201	566.762
ENSG00000168785.8	TSPAN5	169.164	3.02634	0.206457	14.6584	1.18972e-48	1.00246e-46	chr4:98470367-98658611	-	44.6107	37.2335	29.299	281.788	316.642	305.411
ENSG00000157404.16	KIT	244.053	-7.38214	0.503842	-14.6517	1.31368e-48	1.10269e-46	chr4:54657918-54740715	+	500.857	398.931	555.704	4.89214	0.931301	3.00404
ENSG00000152661.9	GJA1	4598.57	-1.13051	0.0772123	-14.6415	1.52591e-48	1.27599e-46	chr6:121435595-121449727	+	6758.53	5631.84	6549.3	3069.33	2783.66	2798.76
ENSG00000146038.12	DCDC2	179.731	-3.02793	0.207263	-14.6091	2.4577e-48	2.04741e-46	chr6:24171755-24358059	-	331.539	317.017	311.546	42.0724	25.1451	51.0686
ENSG00000134884.15	ARGLU1	2147.13	-1.03364	0.0710795	-14.542	6.56814e-48	5.45106e-46	chr13:106541673-106568137	-	2759.78	3049.96	2845.91	1412.85	1444.45	1369.84
ENSG00000116285.13	ERRFI1	6173.65	-1.10156	0.0758324	-14.5262	8.26237e-48	6.83146e-46	chr1:8004404-8026309	-	9239.49	7478.62	8548.47	4062.44	3853.72	3859.19
ENSG00000196502.12	SULT1A1	218.542	-2.37275	0.163601	-14.5033	1.15502e-47	9.51427e-46	chr16:28603944-28623625	-	350.803	372.335	376.004	67.5116	74.5041	70.0942
ENSG00000106772.18	PRUNE2	421.493	-2.18286	0.150817	-14.4735	1.7808e-47	1.45604e-45	chr9:76611376-76906114	-	740.133	643.608	689.503	122.304	200.23	133.179
ENSG00000157851.17	DPYSL5	216.476	-2.41089	0.166801	-14.4538	2.37399e-47	1.93388e-45	chr2:26847747-26950351	+	356.886	356.378	379.91	60.6626	68.9163	76.1023
ENSG00000205413.8	SAMD9	1458.94	1.20296	0.0833015	14.441	2.85496e-47	2.31713e-45	chr7:93099513-93118023	-	928.714	860.626	861.391	2212.23	1911.03	1979.66
ENSG00000106484.16	MEST	2939.32	-1.16293	0.0805663	-14.4344	3.14314e-47	2.54169e-45	chr7:130486171-130506465	+	3930.81	3956.33	4303.05	1985.23	1613.01	1847.48
ENSG00000168734.14	PKIG	1222.14	1.19568	0.0828789	14.4268	3.50789e-47	2.82629e-45	chr20:44531785-44624247	+	755.341	704.245	768.61	1641.8	1808.59	1654.22
ENSG00000143248.13	RGS5	257.833	2.58743	0.179827	14.3885	6.11432e-47	4.90835e-45	chr1:163111121-163321791	-	82.1243	51.0631	86.9204	426.595	504.765	395.532
ENSG00000124942.14	AHNAK	5688.65	-1.29629	0.0900965	-14.3878	6.17724e-47	4.9409e-45	chr11:62433542-62556235	-	7834.25	8197.76	8224.23	2713.18	3702.85	3459.65
ENSG00000146197.9	SCUBE3	920.899	-1.45522	0.101235	-14.3747	7.45678e-47	5.94281e-45	chr6:35213956-35253079	+	1286.61	1472.32	1290.13	429.53	514.078	532.716
ENSG00000087510.7	TFAP2C	889.497	-1.36006	0.0950359	-14.311	1.86772e-46	1.48316e-44	chr20:56629306-56639283	+	1153.8	1311.68	1375.1	490.193	494.521	511.688
ENSG00000102218.6	RP2	874.722	-1.346	0.0940944	-14.3047	2.04449e-46	1.61771e-44	chrX:46837043-46882358	+	1275.46	1146.79	1343.85	510.74	476.826	494.665
ENSG00000163539.18	CLASP2	1416.52	1.10922	0.0775486	14.3035	2.08142e-46	1.64105e-44	chr3:33496245-33718356	-	909.451	922.327	860.414	2024.37	1857.95	1924.59
ENSG00000270069.1	MIR222HG	370.897	-2.17398	0.152115	-14.2917	2.46419e-46	1.93593e-44	chrX:45745211-45770274	-	544.454	730.841	546.915	141.872	147.146	114.153
ENSG00000091428.18	RAPGEF4	278.391	-2.30026	0.161145	-14.2745	3.15539e-46	2.47016e-44	chr2:172735274-173052893	+	449.149	530.844	408.233	98.8213	79.1606	104.14
ENSG00000171877.21	FRMD5	718.265	1.46685	0.1029	14.255	4.17239e-46	3.25476e-44	chr15:43870761-44195271	-	358.914	437.228	349.635	1051.81	1049.58	1062.43
ENSG00000092969.12	TGFB2	1049.06	-1.42169	0.099785	-14.2475	4.64436e-46	3.61018e-44	chr1:218345336-218444619	+	1558.33	1389.34	1635.86	628.151	582.995	499.672
ENSG00000091409.16	ITGA6	3990.4	-1.22493	0.0862082	-14.209	8.05833e-46	6.24195e-44	chr2:172427354-172506459	+	5509.43	5100.99	6156.7	2430.42	2123.37	2621.52
ENSG00000114450.11	GNB4	1501.36	1.37583	0.0969369	14.193	1.01162e-45	7.8086e-44	chr3:179396088-179451476	-	806.035	751.053	947.334	2368.78	1965.05	2169.92
ENSG00000177707.11	NECTIN3	784.523	1.3329	0.0940525	14.1719	1.36788e-45	1.05217e-43	chr3:111070071-111275563	+	416.705	479.78	441.438	1152.59	1083.1	1133.52
ENSG00000106541.12	AGR2	805.109	-10.2815	0.728999	-14.1035	3.6123e-45	2.76893e-43	chr7:16791811-16833433	-	1457.96	1505.3	1863.42	0.978429	0	3.00404
ENSG00000182132.14	KCNIP1	284.271	-2.05614	0.146356	-14.0489	7.82497e-45	5.95669e-43	chr5:170353487-170736632	+	457.26	498.929	418.976	101.757	114.55	114.153
ENSG00000124006.15	OBSL1	3165.36	-1.25285	0.0893704	-14.0187	1.19839e-44	9.09132e-43	chr2:219550728-219571859	-	4968.01	4354.19	4056.93	1680.94	2079.6	1852.49
ENSG00000102230.14	PCYT1B	919.303	-1.51462	0.108146	-14.0054	1.44548e-44	1.09282e-42	chrX:24558087-24672677	-	1465.06	1131.9	1488.39	472.581	471.238	486.654
ENSG00000206337.12	HCP5	291.835	2.25145	0.160845	13.9977	1.61107e-44	1.21385e-42	chr6:31463170-31478936	+	91.2492	105.318	107.43	408.005	564.369	474.638
ENSG00000151746.15	BICD1	2247.7	-1.07132	0.0766293	-13.9805	2.04964e-44	1.53382e-42	chr12:32106835-32383633	+	3095.38	2853.15	3188.71	1565.49	1401.61	1381.86
ENSG00000161638.11	ITGA5	1646.53	1.09761	0.0785924	13.9659	2.51725e-44	1.87739e-42	chr12:54395261-54419266	-	1067.62	1099.98	979.563	2139.82	2369.23	2222.99
ENSG00000177508.12	IRX3	378.442	-1.98754	0.142521	-13.9456	3.34653e-44	2.48748e-42	chr16:54283304-54286787	-	621.509	532.971	659.228	162.419	171.359	123.166
ENSG00000119922.11	IFIT2	1396.1	1.32823	0.0953434	13.931	4.10794e-44	3.04318e-42	chr10:89283694-89309271	+	716.813	861.69	807.676	1773.89	2038.62	2177.93
ENSG00000137449.17	CPEB2	483.053	-1.56703	0.112513	-13.9276	4.3084e-44	3.18101e-42	chr4:15002481-15070153	+	715.8	677.65	773.494	241.672	252.383	237.319
ENSG00000072195.15	SPEG	645.753	-1.43888	0.10381	-13.8607	1.09555e-43	8.03498e-42	chr2:219434843-219493629	+	957.103	998.922	875.063	329.731	376.246	337.454
ENSG00000144481.17	TRPM8	424.978	-1.60981	0.116313	-13.8403	1.45595e-43	1.06429e-41	chr2:233917373-234019522	+	674.23	634.034	612.349	204.492	210.474	214.288
ENSG00000175029.17	CTBP2	1810.76	-1.17335	0.0852986	-13.7558	4.69947e-43	3.41268e-41	chr10:124984317-125161170	-	2290.36	2424.43	2811.73	1108.56	1084.97	1144.54
ENSG00000172159.16	FRMD3	1254.94	-1.32997	0.0967377	-13.7482	5.22069e-43	3.77875e-41	chr9:83242990-83538546	-	1672.9	1647.85	2065.58	743.606	694.751	704.948
ENSG00000099810.21	MTAP	1581.56	1.01816	0.0741075	13.7389	5.93623e-43	4.28262e-41	chr9:21802636-21937651	+	1025.03	1078.71	1033.28	2201.46	2113.12	2037.74
ENSG00000105810.10	CDK6	4691.65	1.14909	0.0836841	13.7313	6.59606e-43	4.74314e-41	chr7:92604921-92836573	-	3124.78	3023.36	2600.77	7142.53	5924.94	6333.51
ENSG00000179456.10	ZBTB18	1714.51	-1.0467	0.0762484	-13.7275	6.94858e-43	4.98042e-41	chr1:244048939-244057476	+	2394.79	2368.05	2169.1	1062.57	1138.98	1153.55
ENSG00000134827.8	TCN1	130.123	3.514	0.256698	13.6892	1.17773e-42	8.36002e-41	chr11:59852800-59866489	-	25.347	11.702	25.3925	260.262	220.718	237.319
ENSG00000187514.17	PTMA	4203.47	-1.11575	0.0818495	-13.6317	2.59457e-42	1.83582e-40	chr2:231706895-231713551	+	6077.2	5027.59	6151.81	2834.51	2545.25	2584.47
ENSG00000154822.18	PLCL2	226.585	2.33406	0.171335	13.6228	2.93159e-42	2.06766e-40	chr3:16802651-17090604	+	63.8745	84.0414	77.154	380.609	335.268	418.563
ENSG00000115457.10	IGFBP2	26652	-1.27778	0.0939745	-13.5971	4.16822e-42	2.93049e-40	chr2:216632828-216664436	+	44426.2	34795.3	33996.6	13718.6	16717.8	16257.9
ENSG00000115641.19	FHL2	736.419	-1.30729	0.0962278	-13.5853	4.89397e-42	3.40818e-40	chr2:105357712-105438513	-	1089.92	1088.28	968.82	434.422	413.498	423.569
ENSG00000187653.11	TMSB4XP8	1006.32	-1.61368	0.118907	-13.5709	5.95702e-42	4.13544e-40	chr4:90838903-90839037	-	1267.35	1851.04	1432.72	475.516	493.59	517.696
ENSG00000151892.16	GFRA1	615.453	-1.55202	0.114542	-13.5498	7.9415e-42	5.49582e-40	chr10:116056925-116276803	-	908.437	1015.94	829.162	349.299	278.459	311.419
ENSG00000063660.9	GPC1	12825.3	1.03583	0.0765067	13.5391	9.18962e-42	6.33969e-40	chr2:240435663-240468076	+	8791.36	8344.56	8092.38	15532.6	19381.3	16809.6
ENSG00000145246.14	ATP10D	515.251	1.45057	0.107254	13.5247	1.11815e-41	7.68979e-40	chr4:47485275-47593486	+	272.734	281.911	273.457	769.045	714.308	780.049
ENSG00000118762.8	PKD2	1334.16	-1.26585	0.0937621	-13.5006	1.5502e-41	1.05951e-39	chr4:88007635-88077777	+	1695.21	1989.33	1969.87	824.816	829.789	695.935
ENSG00000150627.16	WDR17	208.497	2.43741	0.181894	13.4001	6.0343e-41	4.08629e-39	chr4:176065841-176182818	+	59.8189	60.6374	74.2241	408.005	313.849	334.45
ENSG00000244682.7	FCGR2C	120.142	3.53976	0.264719	13.3718	8.84225e-41	5.93318e-39	chr1:161581339-161605662	+	13.1804	26.5954	17.5794	233.844	225.375	204.275
ENSG00000113212.7	PCDHB7	829.396	1.18673	0.0887886	13.3658	9.57498e-41	6.40537e-39	chr5:141172644-141176383	+	526.204	508.503	484.41	1173.14	1157.61	1126.51
ENSG00000134882.16	UBAC2	837.056	-1.24675	0.0935407	-13.3284	1.58254e-40	1.05229e-38	chr13:99200774-99386504	+	1172.05	1121.26	1239.35	494.107	462.857	532.716
ENSG00000136153.20	LMO7	449.356	1.60989	0.120918	13.3139	1.92114e-40	1.2698e-38	chr13:75620434-75859870	+	210.887	217.018	237.322	718.167	705.926	606.816
ENSG00000160307.10	S100B	12745	-1.02736	0.0772198	-13.3043	2.18462e-40	1.43963e-38	chr21:46598604-46605208	-	16499.9	18333.8	16467	9284.31	7489.52	8395.28
ENSG00000196136.18	SERPINA3	144.114	2.97138	0.223377	13.302	2.2523e-40	1.47981e-38	chr14:94612384-94624055	+	24.3331	41.4888	32.2289	264.176	269.146	233.314
ENSG00000189212.12	DPY19L2P1	197.998	2.40732	0.181318	13.2768	3.15686e-40	2.06798e-38	chr7:35079989-35186041	-	51.7079	73.4032	63.4812	357.127	300.81	341.459
ENSG00000109265.15	CRACD	683.16	1.512	0.113981	13.2654	3.67429e-40	2.39981e-38	chr4:56049098-56330609	+	326.469	314.889	421.906	958.86	1064.48	1012.36
ENSG00000146938.16	NLGN4X	138.623	-2.98439	0.225392	-13.2409	5.09431e-40	3.31746e-38	chrX:5840637-6228867	-	253.47	241.486	243.182	39.1372	21.4199	33.0444
ENSG00000125247.16	TMTC4	359.466	-1.70962	0.129396	-13.2123	7.44864e-40	4.82218e-38	chr13:100603625-100675093	-	547.495	582.97	521.522	185.901	166.703	152.205
ENSG00000103044.11	HAS3	271.987	-2.23052	0.170041	-13.1176	2.61165e-39	1.6809e-37	chr16:69105653-69118719	+	531.273	443.611	370.144	90.9939	84.7484	111.149
ENSG00000167889.13	MGAT5B	195.489	-2.33642	0.178215	-13.1101	2.88247e-39	1.84981e-37	chr17:76868404-76950393	+	309.234	370.208	299.826	60.6626	68.9163	64.0861
ENSG00000166689.16	PLEKHA7	459.088	-1.47593	0.112627	-13.1046	3.09872e-39	1.98282e-37	chr11:16777297-17014414	-	709.716	639.353	676.807	240.694	235.619	252.339
ENSG00000140092.15	FBLN5	173.269	2.73578	0.208911	13.0955	3.49578e-39	2.23043e-37	chr14:91869411-91947987	-	33.4581	38.2973	63.4812	289.615	320.368	294.396
ENSG00000165617.15	DACT1	447.088	-1.65167	0.126194	-13.0883	3.83872e-39	2.44218e-37	chr14:58633967-58648321	+	694.508	747.862	592.816	196.664	225.375	225.303
ENSG00000122694.16	GLIPR2	1262.11	-1.01606	0.0777106	-13.0749	4.58167e-39	2.90646e-37	chr9:36136536-36163913	+	1628.29	1706.36	1732.55	808.182	852.141	845.136
ENSG00000163032.12	VSNL1	601.929	-1.46268	0.11203	-13.0561	5.86357e-39	3.6984e-37	chr2:17539126-17657018	+	833.41	940.412	877.017	322.882	359.482	278.374
ENSG00000185432.12	METTL7A	865.288	-1.20839	0.092679	-13.0385	7.39054e-39	4.64825e-37	chr12:50923472-50932510	+	1145.68	1259.56	1218.84	547.92	541.086	478.643
ENSG00000135074.16	ADAM19	1197.18	1.09884	0.0843691	13.0242	8.90841e-39	5.57116e-37	chr5:157395534-157575775	-	741.147	832.967	712.942	1608.54	1610.22	1677.25
ENSG00000164951.16	PDP1	1498.86	-1.10458	0.0848709	-13.0148	1.00757e-38	6.28338e-37	chr8:93857807-93926068	+	2043.98	2237.2	1857.56	960.817	918.263	975.311
ENSG00000173674.11	EIF1AX	1416.72	-1.171	0.0899789	-13.0142	1.01586e-38	6.31723e-37	chrX:20124525-20141838	-	2005.46	1814.87	2065.58	972.558	843.759	798.073
ENSG00000164125.16	GASK1B	4263.07	-1.03881	0.0800283	-12.9806	1.57688e-38	9.72378e-37	chr4:158124474-158173318	-	5456.7	5339.29	6407.69	2616.32	2773.41	2985.01
ENSG00000144668.12	ITGA9	497.311	-4.10206	0.316192	-12.9733	1.73324e-38	1.06582e-36	chr3:37452115-37823507	+	940.881	999.986	878.97	31.3097	72.6415	60.0808
ENSG00000136928.7	GABBR2	2163.4	1.17626	0.0907194	12.9659	1.91021e-38	1.17138e-36	chr9:98288109-98708935	-	1258.23	1187.22	1535.27	2828.64	3145	3026.07
ENSG00000047644.19	WWC3	1198.77	-1.05348	0.081274	-12.9621	2.00733e-38	1.22753e-36	chrX:10015254-10144474	+	1593.82	1687.21	1573.36	817.967	782.293	737.992
ENSG00000157483.9	MYO1E	1593.92	-1.01664	0.0785305	-12.9458	2.48012e-38	1.51246e-36	chr15:59132434-59372871	-	2300.49	1997.84	2101.71	1065.51	1063.55	1034.39
ENSG00000035664.11	DAPK2	285.575	-2.21609	0.171267	-12.9394	2.69833e-38	1.641e-36	chr15:63907036-64072033	-	561.69	374.463	473.667	86.1017	103.374	114.153
ENSG00000157680.16	DGKI	478.231	-1.52491	0.117887	-12.9354	2.8429e-38	1.72417e-36	chr7:137381037-137847092	-	634.689	760.628	734.428	249.499	259.833	230.31
ENSG00000135272.12	MDFIC	356.462	1.95159	0.151253	12.9028	4.34044e-38	2.62519e-36	chr7:114922359-115019202	+	147.013	180.848	112.313	621.302	534.567	542.73
ENSG00000088387.20	DOCK9	474.934	-1.53067	0.118828	-12.8815	5.72477e-38	3.4436e-36	chr13:98793429-99086625	-	695.522	699.99	720.755	237.758	214.199	281.378
ENSG00000213995.12	NAXD	648	-1.23004	0.0960533	-12.8058	1.52121e-37	9.1009e-36	chr13:110615545-110639996	+	901.34	909.562	915.105	368.868	398.597	394.53
ENSG00000173467.9	AGR3	134.111	-6.35732	0.496567	-12.8025	1.58664e-37	9.46668e-36	chr7:16859412-16881987	-	236.234	226.593	332.055	6.849	0.931301	2.00269
ENSG00000205730.7	ITPRIPL2	1262.69	1.0208	0.0797502	12.8	1.64015e-37	9.75957e-36	chr16:19113932-19121629	+	813.132	795.733	891.666	1714.21	1692.17	1669.24
ENSG00000181804.15	SLC9A9	100.82	5.00361	0.390996	12.7971	1.70213e-37	1.01011e-35	chr3:143265222-143848485	-	10.1388	3.19144	4.88317	194.707	206.749	185.249
ENSG00000064309.16	CDON	874.387	-1.11607	0.0873112	-12.7827	2.0481e-37	1.21217e-35	chr11:125955796-126063335	-	1180.16	1251.05	1159.26	545.963	567.162	542.73
ENSG00000101868.13	POLA1	790.103	-1.19039	0.093241	-12.7668	2.51166e-37	1.4786e-35	chrX:24693873-24996986	+	1087.89	1044.67	1163.17	470.624	466.582	507.682
ENSG00000153976.3	HS3ST3A1	1073.57	1.20515	0.0946575	12.7316	3.94421e-37	2.31575e-35	chr17:13494032-13601929	-	712.758	657.437	579.144	1481.34	1601.84	1408.89
ENSG00000145687.16	SSBP2	1507.52	-1.01312	0.0797677	-12.7008	5.85083e-37	3.40799e-35	chr5:81413021-81751797	-	2021.68	1863.8	2162.27	997.997	989.042	1010.36
ENSG00000006534.16	ALDH3B1	345.988	-1.86247	0.148539	-12.5386	4.59079e-36	2.63922e-34	chr11:68008578-68029282	+	594.134	522.333	511.756	113.498	162.978	171.23
ENSG00000109046.15	WSB1	8520.94	-1.05191	0.0840777	-12.5112	6.48627e-36	3.70961e-34	chr17:27294076-27315926	+	12458.6	11845.6	10187.3	5334.39	6181.98	5117.88
ENSG00000133138.20	TBC1D8B	305.661	1.84085	0.147148	12.5103	6.56072e-36	3.7425e-34	chrX:106802673-106876150	+	136.874	106.381	156.261	458.883	475.895	499.672
ENSG00000198692.10	EIF1AY	95.8791	-5.08284	0.406745	-12.4964	7.81496e-36	4.44647e-34	chrY:20575776-20593154	+	151.068	195.742	211.929	5.87057	4.65651	6.00808
ENSG00000166682.13	TMPRSS5	158.896	-2.3871	0.191078	-12.4928	8.17206e-36	4.6377e-34	chr11:113687547-113706373	-	268.678	269.145	262.714	44.0293	57.7407	51.0686
ENSG00000239887.6	C1orf226	414.494	-1.48044	0.118571	-12.4857	8.93153e-36	5.0557e-34	chr1:162378841-162386812	+	604.273	589.353	636.765	216.233	203.024	237.319
ENSG00000196569.13	LAMA2	175.466	-2.218	0.178508	-12.4252	1.90748e-35	1.07423e-33	chr6:128883138-129516566	+	275.775	295.74	294.943	67.5116	57.7407	61.0821
ENSG00000183111.12	ARHGEF37	545.868	-1.75428	0.142208	-12.336	5.79334e-35	3.22964e-33	chr5:149551947-149634968	+	1050.38	709.564	766.657	255.37	271.94	221.297
ENSG00000108179.14	PPIF	1057.74	-1.09749	0.0889771	-12.3345	5.90373e-35	3.28289e-33	chr10:79347469-79355334	+	1364.68	1467	1493.27	617.389	676.125	727.979
ENSG00000124107.5	SLPI	113.657	-5.97666	0.484945	-12.3244	6.69511e-35	3.7136e-33	chr20:45252239-45254564	-	220.012	167.019	284.2	3.91372	2.7939	4.00538
ENSG00000107611.16	CUBN	471.973	1.42074	0.115554	12.2951	9.62351e-35	5.32453e-33	chr10:16823966-17129811	-	263.609	258.507	248.065	623.259	699.407	738.993
ENSG00000132429.10	POPDC3	969.749	-1.10664	0.0900124	-12.2943	9.72226e-35	5.36571e-33	chr6:105157900-105180014	-	1317.03	1365.94	1290.13	671.202	564.369	609.82
ENSG00000112715.25	VEGFA	6059.24	-1.02437	0.0835947	-12.254	1.59855e-34	8.75671e-33	chr6:43770184-43786487	+	9105.66	7595.64	7672.43	3697.48	4419.02	3865.2
ENSG00000170500.13	LONRF2	1786.91	-2.82051	0.230474	-12.2379	1.95078e-34	1.06598e-32	chr2:100271875-100322501	-	2683.74	4073.35	2634.96	392.35	468.444	468.63
ENSG00000114279.15	FGF12	174.717	2.54573	0.208447	12.2128	2.65544e-34	1.44745e-32	chr3:192139390-192767764	-	50.694	68.0841	35.1588	302.335	329.681	262.353
ENSG00000160183.17	TMPRSS3	100.591	-3.74555	0.306753	-12.2103	2.73791e-34	1.48872e-32	chr21:42371887-42396091	-	175.401	192.55	193.373	8.80586	8.38171	25.0337
ENSG00000231566.2	LINC02595	130.255	-3.06522	0.251707	-12.1777	4.08471e-34	2.21558e-32	chrX:45847042-45851541	-	181.485	298.932	217.789	26.4176	28.8703	28.0377
ENSG00000144681.11	STAC	338.986	-1.56672	0.12868	-12.1753	4.20599e-34	2.27577e-32	chr3:36380503-36548007	+	489.704	542.545	488.317	166.333	165.772	181.244
ENSG00000169908.12	TM4SF1	3804.49	1.07081	0.0882141	12.1388	6.57802e-34	3.55052e-32	chr3:149369022-149377692	-	2342.06	2237.2	2781.45	5663.15	4701.21	5101.86
ENSG00000134569.10	LRP4	1157.01	1.19899	0.0989366	12.1188	8.39715e-34	4.51035e-32	chr11:46856717-46918642	-	735.063	638.289	732.475	1401.11	1710.8	1724.32
ENSG00000134905.17	CARS2	520.939	-1.35919	0.112194	-12.1147	8.83212e-34	4.73248e-32	chr13:110641412-110713603	-	724.924	759.564	764.704	254.392	316.642	305.411
ENSG00000164047.6	CAMP	109.166	-3.11038	0.257643	-12.0724	1.47735e-33	7.85881e-32	chr3:48223347-48225491	+	202.776	219.146	165.051	19.5686	21.4199	27.0363
ENSG00000144857.15	BOC	511.157	-1.3444	0.11159	-12.0477	1.99453e-33	1.05844e-31	chr3:113211003-113287459	+	787.785	734.032	678.76	307.227	287.772	271.365
ENSG00000123700.5	KCNJ2	302.085	-1.72762	0.143528	-12.0368	2.2762e-33	1.20497e-31	chr17:70168673-70180044	+	418.733	494.674	478.55	158.505	123.863	138.186
ENSG00000106537.8	TSPAN13	996.504	-1.09692	0.091423	-11.9983	3.62562e-33	1.9057e-31	chr7:16753755-16784536	+	1295.74	1279.77	1498.16	642.828	614.659	647.871
ENSG00000163251.4	FZD5	263.901	-1.7244	0.143849	-11.9876	4.12823e-33	2.16472e-31	chr2:207762598-207769906	-	386.288	428.717	400.42	121.325	115.481	131.176
ENSG00000125538.12	IL1B	85.3552	-3.81377	0.319016	-11.9548	6.13053e-33	3.19193e-31	chr2:112829751-112836816	-	159.179	172.338	146.495	12.7196	8.38171	13.0175
ENSG00000164292.13	RHOBTB3	714.362	1.15187	0.0964549	11.9421	7.14145e-33	3.70952e-31	chr5:95713522-95824383	+	418.733	456.377	455.111	1044.96	939.683	971.306
ENSG00000168807.16	SNTB2	1027.68	-1.07272	0.0898444	-11.9397	7.34794e-33	3.80782e-31	chr16:69187129-69309052	+	1290.67	1444.66	1443.46	698.598	612.796	675.909
ENSG00000139793.19	MBNL2	1025.53	-1.2028	0.100885	-11.9225	9.04014e-33	4.66285e-31	chr13:97221434-97394120	+	1404.22	1367	1517.69	712.296	540.155	611.822
ENSG00000182287.15	AP1S2	2097.35	-1.02009	0.0857219	-11.8999	1.1842e-32	6.07962e-31	chrX:15825806-15854931	-	2822.64	2807.41	2798.05	1591.9	1296.37	1267.7
ENSG00000197442.10	MAP3K5	258.589	1.76958	0.148779	11.894	1.2714e-32	6.51214e-31	chr6:136557046-136792477	-	123.693	112.764	115.243	408.983	362.276	428.576
ENSG00000112541.18	PDE10A	316.361	-1.55872	0.131118	-11.8879	1.36724e-32	6.98684e-31	chr6:165327287-165988078	-	477.538	451.057	488.317	152.635	157.39	171.23
ENSG00000155629.15	PIK3AP1	175.469	2.40413	0.202539	11.87	1.69527e-32	8.62322e-31	chr10:96593315-96720514	-	44.6107	51.0631	71.2942	342.45	284.047	259.349
ENSG00000067646.12	ZFY	81.5238	-4.84064	0.40809	-11.8617	1.87115e-32	9.49597e-31	chrY:2935281-2982506	+	144.985	172.338	155.285	5.87057	4.65651	6.00808
ENSG00000156113.24	KCNMA1	302.24	1.81322	0.15298	11.8527	2.08324e-32	1.05481e-30	chr10:76869601-77638369	-	156.138	140.424	105.476	456.926	436.78	517.696
ENSG00000152767.17	FARP1	721.942	-1.27573	0.107678	-11.8477	2.21179e-32	1.11733e-30	chr13:98142562-98455176	+	1053.42	901.051	1110.43	395.285	408.841	462.622
ENSG00000138821.14	SLC39A8	104.421	3.35153	0.28477	11.7693	5.6205e-32	2.8072e-30	chr4:102251080-102431258	-	28.3887	12.7658	14.6495	211.341	161.115	198.267
ENSG00000113838.13	TBCCD1	886.347	1.07902	0.0918822	11.7435	7.62364e-32	3.78201e-30	chr3:186546067-186570543	-	539.384	597.864	571.331	1263.15	1115.7	1230.65
ENSG00000060656.20	PTPRU	349.088	-1.59702	0.136057	-11.7378	8.15495e-32	4.03652e-30	chr1:29236516-29326813	+	603.259	491.482	479.527	168.29	179.741	172.232
ENSG00000139842.15	CUL4A	1091.47	-1.09309	0.0931453	-11.7353	8.4017e-32	4.14935e-30	chr13:113208193-113267108	+	1543.13	1423.38	1491.32	732.843	608.14	750.008
ENSG00000256043.5	CTSO	497.278	1.33131	0.113516	11.7279	9.16786e-32	4.51762e-30	chr4:155921580-155953912	-	253.47	286.166	308.616	749.477	677.987	707.952
ENSG00000055118.17	KCNH2	93.7291	-3.28793	0.281319	-11.6875	1.47595e-31	7.25679e-30	chr7:150944961-150978321	-	159.179	173.402	177.747	11.7411	23.2825	17.0229
ENSG00000164741.15	DLC1	306.581	1.55823	0.133516	11.6707	1.79831e-31	8.80255e-30	chr8:13083361-13604610	-	153.096	148.934	164.074	481.387	455.406	436.587
ENSG00000237807.4	RP11-400K9.4	176.633	-2.25268	0.193251	-11.6567	2.11996e-31	1.0354e-29	chr8:53493523-53524336	-	303.15	325.527	247.088	64.5763	49.359	70.0942
ENSG00000108691.9	CCL2	518.865	-1.70245	0.146149	-11.6488	2.32761e-31	1.13431e-29	chr17:34255218-34257203	+	614.412	815.946	951.241	263.197	256.108	212.285
ENSG00000204131.9	NHSL2	152.311	2.35799	0.202643	11.6362	2.69713e-31	1.30861e-29	chrX:71910818-72161750	+	58.8051	39.3611	50.7849	272.982	262.627	229.308
ENSG00000111341.10	MGP	16286.7	1.89921	0.163475	11.6177	3.35013e-31	1.61832e-29	chr12:14880864-14885857	-	8108	6803.1	5748.46	27872.5	26108.1	23080
ENSG00000180730.5	SHISA2	87.9451	3.58069	0.309451	11.5711	5.77377e-31	2.77091e-29	chr13:26044597-26052016	-	9.12492	15.9572	15.6261	152.635	148.077	186.25
ENSG00000112562.19	SMOC2	117.056	-2.5617	0.222079	-11.5351	8.7833e-31	4.19697e-29	chr6:168441151-168673445	+	199.734	196.806	204.116	34.245	35.3894	32.0431
ENSG00000256235.3	SMIM3	2674.52	1.02267	0.0889369	11.4988	1.33708e-30	6.36149e-29	chr5:150778757-150796734	+	2046.01	1539.34	1707.16	3509.62	3565.02	3679.95
ENSG00000104490.18	NCALD	538.092	-1.27407	0.111086	-11.4692	1.88302e-30	8.92048e-29	chr8:101686542-102124907	-	801.979	685.097	796.933	330.709	319.436	294.396
ENSG00000047230.15	CTPS2	401.278	-1.48202	0.129342	-11.4582	2.13855e-30	1.01094e-28	chrX:16587999-16712936	-	641.786	580.843	550.821	223.082	231.894	179.241
ENSG00000163364.10	LINC01116	273.451	1.64324	0.14348	11.4528	2.27797e-30	1.07225e-28	chr2:176629572-176637931	-	122.68	141.487	133.799	448.12	392.078	402.541
ENSG00000262655.4	SPON1	112.331	-2.78803	0.24433	-11.4109	3.68841e-30	1.72877e-28	chr11:13962723-14268133	+	232.179	180.848	175.794	24.4607	31.6642	29.039
ENSG00000160932.11	LY6E	1002.2	-1.07085	0.0943013	-11.3556	6.95803e-30	3.24062e-28	chr8:143017982-143023832	+	1361.64	1357.43	1355.57	589.993	735.728	612.824
ENSG00000138162.19	TACC2	380.299	1.42978	0.12598	11.3492	7.4815e-30	3.47709e-28	chr10:121989163-122254545	+	186.554	220.21	210.953	534.222	528.048	601.809
ENSG00000143995.20	MEIS1	502.541	1.20622	0.106294	11.3479	7.59589e-30	3.52283e-28	chr2:66433452-66573869	+	311.261	293.613	306.663	673.159	710.583	719.968
ENSG00000068323.17	TFE3	864.859	-1.03646	0.0914546	-11.333	9.00325e-30	4.16679e-28	chrX:49028726-49043410	-	1205.5	1204.24	1079.18	540.093	591.376	568.765
ENSG00000034053.15	APBA2	876.391	-1.23321	0.109569	-11.2551	2.18614e-29	9.99197e-28	chr15:28884483-29118315	+	1376.85	1287.22	1025.47	498.02	541.086	529.712
ENSG00000143126.8	CELSR2	3213.09	-1.03579	0.0921244	-11.2433	2.49747e-29	1.13679e-27	chr1:109249539-109275751	+	4310.01	4152.07	4496.42	1746.5	2364.57	2208.97
ENSG00000163873.10	GRIK3	129.341	2.73949	0.243965	11.229	2.93696e-29	1.33134e-27	chr1:36795527-37034515	-	25.347	45.744	30.2756	191.772	209.543	273.367
ENSG00000171843.17	MLLT3	335.863	1.7666	0.15744	11.2207	3.22634e-29	1.45357e-27	chr9:20341669-20622499	-	182.498	108.509	166.028	565.532	488.933	503.677
ENSG00000119408.17	NEK6	830.337	-1.13762	0.101836	-11.1711	5.64819e-29	2.53434e-27	chr9:124257606-124353307	+	1127.43	1236.15	1062.58	489.214	582.995	483.65
ENSG00000177098.9	SCN4B	287.271	-1.60821	0.144309	-11.1442	7.64137e-29	3.4079e-27	chr11:118133377-118152888	-	426.844	401.058	469.761	124.26	142.489	159.214
ENSG00000104059.5	FAM189A1	174.909	2.31224	0.209072	11.0595	1.97123e-28	8.68601e-27	chr15:29120252-29570979	-	66.9161	54.2545	54.6915	217.211	312.917	343.462
ENSG00000138795.10	LEF1	79.9871	3.82874	0.346199	11.0593	1.97554e-28	8.68765e-27	chr4:108047545-108168956	-	17.236	8.51052	5.8598	174.16	135.97	138.186
ENSG00000154556.18	SORBS2	501.203	-1.35892	0.123462	-11.0068	3.54539e-28	1.54071e-26	chr4:185585444-185956652	-	684.369	696.799	782.283	233.844	291.497	318.428
ENSG00000180914.11	OXTR	115.323	2.60144	0.236535	10.9981	3.90122e-28	1.69201e-26	chr3:8750381-8769628	-	39.5413	36.1697	22.4626	204.492	203.024	186.25
ENSG00000124479.11	NDP	363.213	-1.87637	0.17128	-10.955	6.28713e-28	2.72147e-26	chrX:43948776-43973395	-	684.369	413.824	614.302	182.966	140.626	143.192
ENSG00000100784.12	RPS6KA5	237.565	-1.81646	0.165912	-10.9484	6.76627e-28	2.92314e-26	chr14:90847861-91060641	-	339.65	329.783	440.462	113.498	96.8553	105.141
ENSG00000003989.18	SLC7A2	379.674	1.3371	0.122289	10.934	7.92755e-28	3.41148e-26	chr8:17497088-17570573	+	218.998	199.997	226.579	569.446	511.284	551.742
ENSG00000144152.13	FBLN7	163.105	2.14412	0.196293	10.9231	8.9435e-28	3.83372e-26	chr2:112138385-112188218	+	54.7495	55.3184	70.3176	239.715	309.192	249.335
ENSG00000138131.4	LOXL4	228.51	-1.64143	0.150294	-10.9214	9.10358e-28	3.89095e-26	chr10:98247690-98268194	-	339.65	360.633	337.915	111.541	106.168	115.155
ENSG00000179761.12	PIPOX	427.651	-1.27655	0.116886	-10.9214	9.11226e-28	3.89095e-26	chr17:28950513-29057216	+	639.759	555.311	621.139	244.607	260.764	244.328
ENSG00000069018.19	TRPC7	125.829	2.394	0.219632	10.9	1.15204e-27	4.90975e-26	chr5:136212745-136365545	-	33.4581	36.1697	50.7849	201.556	220.718	212.285
ENSG00000165959.12	CLMN	382.035	-1.33866	0.123058	-10.8783	1.46317e-27	6.21173e-26	chr14:95181940-95319908	-	588.051	496.801	557.658	214.276	215.131	220.296
ENSG00000186417.14	GLDN	333.632	-1.79113	0.164948	-10.8587	1.81233e-27	7.67925e-26	chr15:51341655-51408005	+	592.106	565.949	395.537	136.002	176.016	136.183
ENSG00000114923.17	SLC4A3	701.462	-1.20009	0.110787	-10.8325	2.416e-27	1.02176e-25	chr2:219627394-219641980	+	938.853	1023.39	970.774	358.105	487.071	430.579
ENSG00000197249.14	SERPINA1	122.462	-2.32561	0.214965	-10.8185	2.81283e-27	1.18504e-25	chr14:94376747-94390693	-	224.068	199.997	188.49	43.0509	39.1146	40.0538
ENSG00000125772.14	GPCPD1	862.877	-1.08771	0.100647	-10.8073	3.18055e-27	1.33741e-25	chr20:5544439-5611006	-	1228.82	1078.71	1212.98	621.302	531.773	503.677
ENSG00000169814.16	BTD	718.921	1.00164	0.0927125	10.8037	3.30607e-27	1.38754e-25	chr3:15601341-15722311	+	481.593	493.61	461.948	934.4	993.698	948.275
ENSG00000185753.13	CXorf38	550.963	-1.1612	0.107551	-10.7967	3.56784e-27	1.49457e-25	chrX:40626921-40647561	-	789.813	759.564	735.405	310.162	374.383	336.452
ENSG00000235387.5	SPAAR	126.382	-2.27872	0.212705	-10.7131	8.83887e-27	3.6678e-25	chr9:35909490-35937153	+	204.804	206.38	217.789	43.0509	51.2216	35.0471
ENSG00000167767.14	KRT80	113.218	-2.36443	0.22091	-10.7031	9.84072e-27	4.06824e-25	chr12:52168996-52192014	-	193.651	180.848	194.35	35.2234	38.1833	37.0498
ENSG00000164116.17	GUCY1A1	91.5661	2.84535	0.266613	10.6722	1.37335e-26	5.64581e-25	chr4:155666726-155737059	+	18.2498	24.4677	24.4158	174.16	163.909	144.194
ENSG00000136235.17	GPNMB	185.971	-2.23846	0.210451	-10.6365	2.01586e-26	8.21074e-25	chr7:23235967-23275108	+	401.497	280.847	238.299	74.3606	57.7407	63.0848
ENSG00000078061.14	ARAF	696.22	-1.02641	0.0965875	-10.6268	2.23737e-26	9.09615e-25	chrX:47561205-47571908	+	882.076	1001.05	919.012	445.185	469.376	460.619
ENSG00000166741.8	NNMT	1373.19	1.00653	0.0948934	10.607	2.76593e-26	1.12038e-24	chr11:114257787-114313536	+	935.812	1009.56	794.003	1764.11	1988.33	1747.35
ENSG00000170921.15	TANC2	667.264	-1.01767	0.0960355	-10.5968	3.08246e-26	1.24403e-24	chr17:63009556-63427699	+	899.312	892.541	887.76	426.595	423.742	473.637
ENSG00000165246.14	NLGN4Y	67.7641	-5.08333	0.480216	-10.5855	3.47946e-26	1.40169e-24	chrY:14522573-14845650	+	114.568	155.317	125.009	1.95686	3.7252	6.00808
ENSG00000189337.17	KAZN	301.579	-1.55534	0.147346	-10.5557	4.7808e-26	1.92242e-24	chr1:13892792-15118043	+	506.94	459.568	383.817	137.958	162.978	158.213
ENSG00000065534.19	MYLK	857.476	-1.40283	0.132977	-10.5495	5.10908e-26	2.05069e-24	chr3:123610049-123884332	-	1333.25	1415.94	984.446	385.501	528.048	497.669
ENSG00000126391.14	FRMD8	1098.71	1.01982	0.0967494	10.5409	5.59671e-26	2.24234e-24	chr11:65386621-65413525	+	706.675	823.393	648.485	1406.98	1574.83	1431.92
ENSG00000286432.1	RP11-398J12.1	77.5595	3.34472	0.317452	10.5361	5.88759e-26	2.35461e-24	chr5:28614613-28654531	+	18.2498	12.7658	10.743	155.57	150.871	117.157
ENSG00000107518.18	ATRNL1	265.872	1.70327	0.162025	10.5124	7.57267e-26	3.00673e-24	chr10:115093365-115948999	+	119.638	117.02	137.705	415.832	333.406	471.634
ENSG00000167654.18	ATCAY	71.0667	-3.40588	0.324311	-10.5019	8.46898e-26	3.35657e-24	chr19:3879864-3928082	+	127.749	122.339	139.659	8.80586	15.8321	12.0162
ENSG00000012174.12	MBTPS2	231.572	-1.61584	0.154058	-10.4885	9.75622e-26	3.85983e-24	chrX:21839617-21885423	+	349.789	315.953	381.864	111.541	120.138	110.148
ENSG00000108176.15	DNAJC12	181.007	2.03964	0.194527	10.4851	1.0113e-25	3.9938e-24	chr10:67796669-67838188	-	60.8328	75.5308	76.1774	339.515	302.673	231.311
ENSG00000128805.15	ARHGAP22	146.489	-2.12335	0.202593	-10.4808	1.05816e-25	4.17143e-24	chr10:48446036-48656265	-	262.595	212.763	239.275	45.9862	51.2216	67.0902
ENSG00000149089.13	APIP	433.691	-1.24044	0.118417	-10.4752	1.12327e-25	4.42018e-24	chr11:34853094-34916379	-	550.537	622.332	655.321	271.025	249.589	253.341
ENSG00000114019.15	AMOTL2	2106.51	-3.18209	0.305001	-10.433	1.75196e-25	6.85748e-24	chr3:134355347-134375479	-	3040.63	4766.95	3577.41	338.536	555.056	360.485
ENSG00000225217.1	HSPA7	100.94	2.85523	0.274439	10.4039	2.38038e-25	9.26795e-24	chr1:161606291-161608217	+	25.347	32.9783	15.6261	168.29	214.199	149.201
ENSG00000147050.17	KDM6A	656.741	-1.01371	0.0974591	-10.4014	2.44304e-25	9.49516e-24	chrX:44873188-45112779	+	902.354	896.796	835.998	423.66	420.017	461.621
ENSG00000176399.4	DMRTA1	283.26	1.47884	0.142308	10.3918	2.7023e-25	1.04843e-23	chr9:22446824-22455740	+	136.874	161.7	150.402	451.056	420.017	379.51
ENSG00000144366.16	GULP1	849.002	-1.16978	0.112758	-10.3743	3.24744e-25	1.25773e-23	chr2:188291669-188595931	+	1172.05	1225.51	1128.99	634.022	476.826	456.614
ENSG00000205268.11	PDE7A	545.799	-1.23737	0.119335	-10.3688	3.43657e-25	1.32865e-23	chr8:65714334-65842322	-	792.854	655.31	850.648	330.709	300.81	344.463
ENSG00000171346.16	KRT15	80.1164	-4.90195	0.472803	-10.3678	3.47291e-25	1.33801e-23	chr17:41513745-41522529	-	250.428	115.956	98.64	5.87057	2.7939	7.00942
ENSG00000157388.20	CACNA1D	115.55	2.37121	0.229101	10.35	4.18291e-25	1.60868e-23	chr3:53328963-53813733	+	36.4997	47.8717	28.3224	200.578	192.779	187.252
ENSG00000124145.6	SDC4	1433.57	-1.02794	0.099445	-10.3368	4.80358e-25	1.83785e-23	chr20:45325288-45348424	-	1859.46	2138.27	1774.54	843.406	1077.52	908.221
ENSG00000185989.11	RASA3	509.965	-1.12361	0.108778	-10.3295	5.18489e-25	1.97348e-23	chr13:113977783-114132623	-	700.591	682.969	713.919	291.572	348.307	322.433
ENSG00000182054.10	IDH2	841.31	-1.01715	0.0985469	-10.3215	5.6358e-25	2.14141e-23	chr15:90083045-90102477	-	1176.1	1039.35	1163.17	498.999	603.483	566.762
ENSG00000198947.18	DMD	133.953	-2.36933	0.229865	-10.3075	6.51933e-25	2.46439e-23	chrX:31097677-33339609	-	210.887	279.783	182.63	49.8999	34.4581	46.0619
ENSG00000133216.17	EPHB2	776.775	-1.14233	0.110852	-10.305	6.68794e-25	2.52381e-23	chr1:22710839-22921500	+	1002.73	1251.05	954.171	458.883	486.139	507.682
ENSG00000110042.8	DTX4	188.99	1.78956	0.173737	10.3004	7.01715e-25	2.64353e-23	chr11:59171430-59208588	+	84.1521	70.2118	99.6166	307.227	293.36	279.376
ENSG00000162944.11	RFTN2	137.45	2.41906	0.234974	10.295	7.41913e-25	2.7902e-23	chr2:197568224-197676045	-	25.347	45.744	58.598	248.521	201.161	245.33
ENSG00000163235.16	TGFA	720.265	-1.02409	0.0995603	-10.2861	8.13776e-25	3.0449e-23	chr2:70447284-70554193	-	1003.74	940.412	953.194	513.675	488.002	422.568
ENSG00000169760.17	NLGN1	89.5877	2.66757	0.259361	10.2852	8.2192e-25	3.07017e-23	chr3:173396284-174286644	+	26.3609	20.2125	26.3691	155.57	151.802	157.211
ENSG00000180182.11	MED14	622.747	-1.04299	0.101484	-10.2774	8.90694e-25	3.32145e-23	chrX:40648305-40735858	-	828.34	811.691	875.063	388.436	388.353	444.598
ENSG00000170075.10	GPR37L1	178.184	-1.83746	0.179194	-10.254	1.13523e-24	4.21907e-23	chr1:202122886-202133592	+	264.623	315.953	254.901	68.49	81.0232	84.1131
ENSG00000081479.15	LRP2	66.5769	-5.32922	0.519796	-10.2525	1.153e-24	4.27793e-23	chr2:169127109-169362534	-	106.457	131.913	151.378	6.849	1.8626	1.00135
ENSG00000156510.13	HKDC1	60.6847	-4.39566	0.432026	-10.1745	2.5767e-24	9.48054e-23	chr10:69220332-69267552	+	108.485	140.424	98.64	7.82743	3.7252	5.00673
ENSG00000073734.10	ABCB11	308.181	-1.52662	0.150072	-10.1726	2.62841e-24	9.65472e-23	chr2:168915498-169031324	-	430.899	403.186	538.125	146.764	150.871	179.241
ENSG00000138772.13	ANXA3	63.8924	-3.50412	0.344735	-10.1647	2.85032e-24	1.04006e-22	chr4:78551747-78610451	+	120.652	108.509	123.056	11.7411	8.38171	11.0148
ENSG00000090539.15	CHRD	522.373	1.36112	0.13427	10.1372	3.77833e-24	1.37641e-22	chr3:184380073-184390736	+	300.109	302.123	276.387	606.626	894.98	754.014
ENSG00000142149.9	HUNK	301.422	-1.48807	0.146818	-10.1354	3.84605e-24	1.39877e-22	chr21:31873020-32044633	+	480.579	415.952	436.555	129.153	162.046	184.248
ENSG00000100065.15	CARD10	114.759	-2.33383	0.230412	-10.1289	4.11197e-24	1.48813e-22	chr22:37490362-37519542	-	193.651	170.21	210.953	36.2019	47.4964	30.0404
ENSG00000203727.4	SAMD5	62.7426	4.67614	0.461736	10.1273	4.18047e-24	1.51044e-22	chr6:147508690-147737547	+	3.04164	1.06381	9.76633	125.239	106.168	131.176
ENSG00000132613.15	MTSS2	338.836	-1.25968	0.124639	-10.1066	5.16253e-24	1.86222e-22	chr16:70661204-70686053	-	483.621	493.61	457.064	191.772	207.68	199.268
ENSG00000114790.13	ARHGEF26	153.339	1.90997	0.189082	10.1012	5.45504e-24	1.95914e-22	chr3:154121003-154257827	+	59.8189	70.2118	63.4812	217.211	257.97	251.338
ENSG00000172986.13	GXYLT2	523.036	-1.21544	0.120698	-10.0701	7.4891e-24	2.67957e-22	chr3:72888046-72998138	+	813.132	761.691	619.186	315.054	328.749	300.404
ENSG00000141542.11	RAB40B	452.031	-1.18641	0.117835	-10.0684	7.62011e-24	2.71763e-22	chr17:82654973-82698698	-	624.55	690.416	569.377	285.701	260.764	281.378
ENSG00000171533.12	MAP6	63.3457	-3.82057	0.379759	-10.0605	8.25651e-24	2.93985e-22	chr11:75586918-75669038	-	122.68	94.6795	137.705	4.89214	12.1069	8.01077
ENSG00000225434.3	LINC01504	132.397	-2.05318	0.204203	-10.0546	8.77104e-24	3.11803e-22	chr9:72305367-72356721	+	203.79	197.87	238.299	48.9214	48.4277	57.0767
ENSG00000126822.18	PLEKHG3	238.759	-1.53341	0.152588	-10.0494	9.24611e-24	3.28162e-22	chr14:64704102-64750249	+	342.692	397.867	324.242	125.239	117.344	125.168
ENSG00000026559.14	KCNG1	83.7823	2.77949	0.276878	10.0387	1.03047e-23	3.64561e-22	chr20:51003656-51023107	-	23.3192	17.021	23.4392	143.829	163.909	131.176
ENSG00000198189.11	HSD17B11	332.117	1.32363	0.132146	10.0164	1.29108e-23	4.55302e-22	chr4:87336515-87391188	-	185.54	184.04	199.233	504.869	495.452	423.569
ENSG00000102760.13	RGCC	72.6585	-3.24444	0.325405	-9.97047	2.05262e-23	7.19264e-22	chr13:41457550-41470871	+	131.804	105.318	157.238	8.80586	16.7634	16.0215
ENSG00000135912.11	TTLL4	680.862	-1.00083	0.10039	-9.96942	2.07431e-23	7.25712e-22	chr2:218710835-218755416	+	961.159	942.54	820.372	454.969	440.505	465.626
ENSG00000141753.7	IGFBP4	99.4427	-2.36632	0.237626	-9.95818	2.32279e-23	8.1136e-22	chr17:40443450-40457725	+	153.096	165.955	180.677	35.2234	31.6642	30.0404
ENSG00000153233.13	PTPRR	99.4277	-2.74177	0.275371	-9.95662	2.35945e-23	8.22863e-22	chr12:70638073-70920738	-	232.179	138.296	148.448	24.4607	25.1451	28.0377
ENSG00000081041.9	CXCL2	429.714	1.46879	0.147718	9.94319	2.70048e-23	9.37354e-22	chr4:74097040-74099196	-	211.901	175.529	295.92	623.259	652.842	618.832
ENSG00000146592.17	CREB5	585.37	1.01772	0.102431	9.93561	2.91387e-23	1.00727e-21	chr7:28299321-28825894	+	354.858	414.888	391.63	798.398	767.392	785.055
ENSG00000161267.12	BDH1	431.499	1.13249	0.114625	9.87993	5.0867e-23	1.7437e-21	chr3:197509783-197573323	-	250.428	289.358	271.504	601.734	607.208	568.765
ENSG00000130177.16	CDC16	439.016	-1.1075	0.112253	-9.8661	5.83892e-23	1.99845e-21	chr13:114234887-114272723	+	598.189	620.204	581.097	268.09	296.154	270.363
ENSG00000138376.11	BARD1	510.793	-1.05884	0.107383	-9.86039	6.18109e-23	2.10902e-21	chr2:214725646-214809683	-	665.106	689.352	715.872	340.493	305.467	348.468
ENSG00000073464.13	CLCN4	495.723	-1.02648	0.104342	-9.83767	7.74861e-23	2.63979e-21	chrX:10156975-10237660	+	677.272	657.437	660.204	328.752	322.23	328.441
ENSG00000132326.12	PER2	342.655	-1.26131	0.128417	-9.82203	9.05068e-23	3.07863e-21	chr2:238244044-238290102	-	495.788	503.184	452.181	208.405	215.131	181.244
ENSG00000137269.15	LRRC1	511.188	-1.10707	0.113011	-9.79613	1.16987e-22	3.97323e-21	chr6:53794497-53924125	+	700.591	751.053	643.601	340.493	338.994	292.393
ENSG00000138411.13	HECW2	55.7101	4.2882	0.438037	9.78959	1.24795e-22	4.23192e-21	chr2:196189099-196593684	-	4.05552	6.38289	5.8598	115.455	103.374	99.1333
ENSG00000102287.19	GABRE	465.994	1.09193	0.112005	9.74888	1.86519e-22	6.24825e-21	chrX:151953124-151974680	-	293.011	281.911	317.406	633.043	600.689	669.9
ENSG00000007174.18	DNAH9	290.573	1.33148	0.136974	9.72064	2.46236e-22	8.23621e-21	chr17:11598470-11969748	+	182.498	167.019	146.495	411.919	420.948	414.557
ENSG00000056736.10	IL17RB	121.937	-2.03527	0.209428	-9.71826	2.52045e-22	8.41777e-21	chr3:53846568-53865794	+	181.485	194.678	211.929	52.8352	45.6338	45.0606
ENSG00000143416.21	SELENBP1	58.3439	-3.81389	0.392793	-9.70966	2.74252e-22	9.14559e-21	chr1:151364304-151372707	-	112.541	88.2966	125.986	3.91372	9.31301	10.0135
ENSG00000127124.16	HIVEP3	601.162	-1.16669	0.120256	-9.70167	2.966e-22	9.87595e-21	chr1:41506365-42035925	-	861.798	942.54	691.456	392.35	361.345	357.481
ENSG00000174469.23	CNTNAP2	59.1535	3.69171	0.380892	9.69228	3.25195e-22	1.07793e-20	chr7:146116002-148420998	+	7.09716	11.702	6.83643	126.217	95.924	107.144
ENSG00000197971.16	MBP	269.972	-1.52643	0.1576	-9.68546	3.47642e-22	1.15061e-20	chr18:76978827-77133683	-	414.677	461.696	326.196	146.764	131.313	139.187
ENSG00000075461.6	CACNG4	296.804	-1.31738	0.13624	-9.6696	4.05973e-22	1.34166e-20	chr17:66964707-67033398	+	436.982	436.164	397.49	172.203	152.733	185.249
ENSG00000198478.8	SH3BGRL2	333.517	1.32399	0.137592	9.62261	6.41823e-22	2.11161e-20	chr6:79631329-79703655	+	209.873	190.423	170.911	524.438	422.811	482.649
ENSG00000183579.16	ZNRF3	412.911	-1.11835	0.116786	-9.5761	1.0078e-21	3.28143e-20	chr22:28883572-29057488	+	554.593	588.29	553.751	257.327	282.184	241.324
ENSG00000118997.14	DNAH7	90.8914	2.59799	0.271534	9.56781	1.09196e-21	3.55025e-20	chr2:195737703-196068837	-	32.4442	23.4039	21.4859	123.282	169.497	175.236
ENSG00000126768.12	TIMM17B	525.598	-1.04452	0.109323	-9.55445	1.24239e-21	4.02154e-20	chrX:48893447-48898143	-	686.397	764.883	672.9	316.033	353.894	359.483
ENSG00000171303.7	KCNK3	63.6593	-3.55285	0.372092	-9.54832	1.31822e-21	4.26075e-20	chr2:26692690-26733420	+	150.054	80.8499	121.103	10.7627	11.1756	8.01077
ENSG00000125848.10	FLRT3	57.511	3.91675	0.411096	9.52759	1.6097e-21	5.18771e-20	chr20:14322985-14337614	-	7.09716	9.57433	4.88317	121.325	81.0232	121.163
ENSG00000184371.14	CSF1	732.441	-1.22278	0.128584	-9.50957	1.91449e-21	6.15202e-20	chr1:109910242-109930992	+	956.089	1221.26	899.479	364.954	458.2	494.665
ENSG00000142634.13	EFHD2	470.627	-1.09526	0.115285	-9.5005	2.08892e-21	6.70276e-20	chr1:15409888-15430339	+	622.523	674.459	626.999	270.046	334.337	295.397
ENSG00000046647.14	GEMIN8	256.329	-1.39661	0.148364	-9.41336	4.80532e-21	1.53298e-19	chrX:14006726-14029893	-	396.427	376.59	341.822	156.549	143.42	123.166
ENSG00000127241.18	MASP1	52.8579	-3.79631	0.405322	-9.36615	7.52251e-21	2.37918e-19	chr3:187217282-187291980	-	117.61	90.4242	87.897	7.82743	8.38171	5.00673
ENSG00000049192.15	ADAMTS6	76.8614	2.65338	0.284898	9.31343	1.2377e-20	3.90336e-19	chr5:65148738-65481920	-	22.3054	25.5316	15.6261	147.743	124.794	125.168
ENSG00000171243.8	SOSTDC1	55.4122	-5.58654	0.600868	-9.29746	1.43846e-20	4.53001e-19	chr7:16461481-16530580	-	105.444	102.126	118.173	2.93529	2.7939	1.00135
ENSG00000185090.15	MANEAL	316.665	-1.29316	0.139278	-9.28476	1.62067e-20	5.08931e-19	chr1:37793847-37801137	+	477.538	424.462	447.298	152.635	192.779	205.276
ENSG00000056998.20	GYG2	416.966	-1.14412	0.123428	-9.26953	1.86973e-20	5.85479e-19	chrX:2828822-2882820	+	533.301	581.907	607.466	226.995	287.772	264.355
ENSG00000165124.18	SVEP1	145.278	1.98074	0.213983	9.25654	2.11174e-20	6.58456e-19	chr9:110365248-110579880	-	57.7912	44.6802	73.2475	203.513	216.062	276.371
ENSG00000152583.13	SPARCL1	34275.5	-1.60335	0.173628	-9.2344	2.59726e-20	8.08705e-19	chr4:87473335-87531061	-	49154.9	42962.2	62612	17261.4	15590.9	18071.3
ENSG00000138759.20	FRAS1	65.9633	-6.33401	0.687065	-9.21893	3.00072e-20	9.31699e-19	chr4:78057323-78544269	+	114.568	130.849	145.518	0.978429	1.8626	2.00269
ENSG00000111424.12	VDR	93.6754	-2.24469	0.243499	-9.21848	3.01343e-20	9.34334e-19	chr12:47841537-47943048	-	165.263	155.317	143.565	39.1372	30.7329	28.0377
ENSG00000111907.21	TPD52L1	176.934	-1.6194	0.176168	-9.19232	3.84457e-20	1.18537e-18	chr6:125119049-125264407	+	277.803	284.039	239.275	97.8429	87.5423	75.101
ENSG00000108830.10	RND2	61.8426	-3.19102	0.348017	-9.16914	4.76811e-20	1.46399e-18	chr17:43025231-43032041	+	119.638	97.871	117.196	9.78429	19.5573	7.00942
ENSG00000163975.12	MELTF	342.353	1.27525	0.139347	9.1516	5.60964e-20	1.71759e-18	chr3:196988621-197029817	-	222.04	181.912	196.303	432.466	465.651	555.747
ENSG00000074416.15	MGLL	150.911	1.80463	0.197224	9.15016	5.68492e-20	1.73823e-18	chr3:127689062-128052190	-	48.6663	78.7223	74.2241	242.65	231.894	229.308
ENSG00000122641.11	INHBA	63.3193	3.26849	0.357953	9.13107	6.78281e-20	2.0682e-18	chr7:41667168-41705834	-	9.12492	17.021	9.76633	83.1665	126.657	134.18
ENSG00000081320.11	STK17B	284.04	1.46	0.160552	9.0936	9.58131e-20	2.90147e-18	chr2:196133583-196176503	-	183.512	132.977	137.705	489.214	375.314	385.518
ENSG00000064225.12	ST3GAL6	176.612	1.7478	0.192734	9.06846	1.20716e-19	3.63565e-18	chr3:98732236-98821201	+	72.9994	102.126	68.3643	289.615	228.169	298.401
ENSG00000231817.9	LINC01198	149.672	1.83257	0.202227	9.06192	1.28171e-19	3.8549e-18	chr13:46455131-46515958	-	55.7634	79.7861	61.5279	263.197	197.436	240.323
ENSG00000118263.15	KLF7	217.735	-1.41036	0.155734	-9.05619	1.35091e-19	4.0575e-18	chr2:207074137-207167267	-	301.122	302.123	345.728	122.304	108.962	126.17
ENSG00000111885.7	MAN1A1	47.8819	4.05535	0.448273	9.04663	1.47454e-19	4.41682e-18	chr6:119177205-119349761	-	6.08328	6.38289	3.90653	94.9076	82.8858	93.1252
ENSG00000177807.10	KCNJ10	93.1238	2.21774	0.245671	9.0273	1.75956e-19	5.2563e-18	chr1:159998651-160070160	-	32.4442	37.2335	29.299	155.57	135.97	168.226
ENSG00000108551.5	RASD1	111.247	-2.03376	0.225315	-9.02626	1.77638e-19	5.29937e-18	chr17:17494437-17496395	-	206.832	159.572	169.934	49.8999	38.1833	43.0579
ENSG00000175302.5	ANKRD30BP1	49.1237	4.67037	0.517815	9.01937	1.89173e-19	5.63587e-18	chr21:13384249-13427773	-	3.04164	1.06381	6.83643	110.562	93.1301	80.1077
ENSG00000138623.10	SEMA7A	475.747	-1.07535	0.119649	-8.98759	2.5271e-19	7.47113e-18	chr15:74409289-74433958	-	662.064	641.48	632.858	319.946	341.788	256.345
ENSG00000168269.10	FOXI1	55.0049	-5.79922	0.64525	-8.98755	2.52805e-19	7.47113e-18	chr5:170105897-170109734	+	88.2076	126.594	109.383	0.978429	1.8626	3.00404
ENSG00000180447.7	GAS1	279.075	-1.53574	0.170886	-8.98695	2.54175e-19	7.50157e-18	chr9:86944362-86947506	-	435.969	391.484	417.022	179.052	98.7179	152.205
ENSG00000187391.22	MAGI2	251.171	1.38026	0.153632	8.98425	2.60516e-19	7.67843e-18	chr7:78017055-79453667	-	138.902	129.785	149.425	403.113	374.383	311.419
ENSG00000100167.20	SEPTIN3	352.427	-1.19046	0.132593	-8.97832	2.74928e-19	8.09242e-18	chr22:41969475-41998221	+	477.538	441.483	550.821	206.448	203.955	234.315
ENSG00000169255.15	B3GALNT1	324.677	-1.15085	0.128741	-8.93928	3.91731e-19	1.13787e-17	chr3:161083883-161105411	-	463.343	435.1	444.368	210.362	181.604	213.287
ENSG00000116985.12	BMP8B	229.561	1.41351	0.158178	8.93618	4.02856e-19	1.16865e-17	chr1:39757182-39788865	-	135.86	118.083	122.079	313.097	381.833	306.412
ENSG00000185112.6	FAM43A	161.585	-1.82289	0.204147	-8.92932	4.28647e-19	1.24021e-17	chr3:194685883-194689037	+	285.914	276.592	193.373	84.1449	62.3972	67.0902
ENSG00000147485.13	PXDNL	46.6013	4.45988	0.501057	8.90095	5.5369e-19	1.5999e-17	chr8:51319577-51809445	-	4.05552	1.06381	6.83643	82.188	90.3362	95.1279
ENSG00000164929.17	BAALC	96.3601	-2.11524	0.238272	-8.87743	6.84219e-19	1.97191e-17	chr8:103140713-103230305	+	166.276	153.189	150.402	42.0724	38.1833	28.0377
ENSG00000156869.14	FRRS1	108.689	2.01505	0.227298	8.86525	7.63326e-19	2.19417e-17	chr1:99703970-99766635	-	39.5413	47.8717	41.9952	198.621	150.871	173.233
ENSG00000171476.22	HOPX	50.1605	5.36609	0.606406	8.84901	8.83025e-19	2.52182e-17	chr4:56647988-56681899	-	2.02776	3.19144	1.95327	111.541	93.1301	89.1198
ENSG00000226067.7	LINC00623	68.2926	2.75897	0.312488	8.82903	1.05589e-18	2.99226e-17	chr1:120913184-121009291	+	22.3054	11.702	18.556	99.7997	119.207	138.186
ENSG00000205927.5	OLIG2	100.811	2.38874	0.271052	8.81286	1.21988e-18	3.44817e-17	chr21:33025935-33029196	+	36.4997	37.2335	23.4392	222.103	130.382	155.209
ENSG00000126016.17	AMOT	464.925	-1.03385	0.117456	-8.80205	1.34344e-18	3.79255e-17	chrX:112774503-112840831	-	613.398	653.182	607.466	271.025	298.016	346.466
ENSG00000086712.13	TXLNG	457.98	-1.10734	0.12592	-8.79401	1.4431e-18	4.0635e-17	chrX:16786432-16844519	+	696.536	572.332	607.466	327.774	252.383	291.392
ENSG00000197948.11	FCHSD1	704.003	1.12129	0.12752	8.79309	1.45498e-18	4.09173e-17	chr5:141639302-141651418	-	420.76	513.823	396.513	801.333	1121.29	970.304
ENSG00000080573.7	COL5A3	72.483	-2.50619	0.28567	-8.77302	1.73933e-18	4.87276e-17	chr19:9959561-10010504	-	107.471	124.466	137.705	21.5254	17.6947	26.035
ENSG00000185689.17	C6orf201	67.9417	2.65829	0.303041	8.77207	1.75414e-18	4.90803e-17	chr6:4079209-4130951	+	22.3054	12.7658	20.5093	108.606	131.313	112.151
ENSG00000173681.16	BCLAF3	314.803	-1.14842	0.131149	-8.75661	2.01219e-18	5.59458e-17	chrX:19912860-19970298	-	441.038	445.738	415.069	213.297	197.436	176.237
ENSG00000091844.8	RGS17	193.509	1.58053	0.180981	8.73308	2.47828e-18	6.85594e-17	chr6:153004459-153131282	-	111.527	90.4242	88.8736	337.558	240.276	292.393
ENSG00000182568.17	SATB1	144.774	1.68556	0.193828	8.6962	3.43174e-18	9.46988e-17	chr3:18345377-18445588	-	69.9577	79.7861	56.6447	228.952	230.031	203.273
ENSG00000161912.18	ADCY10P1	140.558	1.69356	0.195682	8.65463	4.94522e-18	1.34612e-16	chr6:41101022-41140835	+	64.8883	63.8289	70.3176	187.858	215.131	241.324
ENSG00000196517.13	SLC6A9	258.237	1.28062	0.14827	8.6371	5.76556e-18	1.55981e-16	chr1:43991500-44031467	-	143.971	174.466	133.799	345.385	362.276	389.524
ENSG00000010818.10	HIVEP2	335.659	1.23215	0.142812	8.62776	6.25668e-18	1.69061e-16	chr6:142751469-142956698	-	228.123	160.636	211.929	462.797	436.78	513.69
ENSG00000166780.11	BMERB1	331.376	1.09591	0.127699	8.582	9.32362e-18	2.50704e-16	chr16:15434475-15625028	+	201.762	235.103	197.28	449.099	455.406	449.604
ENSG00000197594.14	ENPP1	151.348	1.65237	0.192843	8.56847	1.04872e-17	2.8165e-16	chr6:131808016-131895155	+	71.9855	81.9137	65.4344	262.219	200.23	226.304
ENSG00000172985.11	SH3RF3	103.707	-1.90728	0.222665	-8.56568	1.07439e-17	2.88192e-16	chr2:109129205-109504634	+	167.29	149.998	173.841	42.0724	40.9773	48.0646
ENSG00000138311.18	ZNF365	284.293	1.15713	0.135217	8.55758	1.15256e-17	3.08787e-16	chr10:62374192-62480288	+	166.276	186.168	175.794	413.875	391.146	372.501
ENSG00000154734.16	ADAMTS1	57.903	2.79849	0.327299	8.55025	1.2282e-17	3.27856e-16	chr21:26835755-26845409	-	16.2221	11.702	15.6261	96.8645	96.8553	110.148
ENSG00000231131.8	LNCAROD	63.113	-2.61153	0.305686	-8.54316	1.30597e-17	3.48195e-16	chr10:52450874-52755507	-	104.43	111.701	109.383	12.7196	21.4199	19.0256
ENSG00000183454.18	GRIN2A	53.1401	3.131	0.367835	8.51197	1.71003e-17	4.53189e-16	chr16:9753404-10182928	-	15.2082	12.7658	4.88317	96.8645	94.9927	94.1265
ENSG00000096696.15	DSP	396.912	-1.00851	0.118926	-8.48016	2.24892e-17	5.95289e-16	chr6:7541617-7586714	+	526.204	515.95	548.868	247.543	290.566	252.339
ENSG00000137872.17	SEMA6D	52.7485	-3.01736	0.356115	-8.47298	2.39189e-17	6.30864e-16	chr15:47184101-47774228	+	104.43	91.4881	85.9437	12.7196	14.9008	7.00942
ENSG00000176595.4	KBTBD11	54.5861	-3.15992	0.374421	-8.4395	3.18711e-17	8.386e-16	chr8:1973677-2006936	+	90.2354	97.871	106.453	19.5686	8.38171	5.00673
ENSG00000095203.15	EPB41L4B	106.295	-1.84628	0.218774	-8.43922	3.19456e-17	8.3956e-16	chr9:109171974-109321059	-	154.11	167.019	177.747	48.9214	41.9086	48.0646
ENSG00000198521.12	ZNF43	230.692	1.30418	0.154735	8.4285	3.50133e-17	9.17998e-16	chr19:21804946-21852125	-	133.832	137.232	127.939	372.781	298.948	313.421
ENSG00000227082.3	LINC02798	61.4368	2.61564	0.310816	8.4154	3.91561e-17	1.02418e-15	chr1:121396754-121463508	+	18.2498	12.7658	20.5093	103.713	105.237	108.145
ENSG00000277778.2	PGM5P2	518.644	1.03059	0.122557	8.40905	4.1335e-17	1.0799e-15	chr9:41006999-41074617	-	297.067	397.867	328.149	749.477	632.354	706.95
ENSG00000049130.16	KITLG	414.255	-1.06094	0.126199	-8.40693	4.20898e-17	1.09832e-15	chr12:88492793-88580851	-	606.3	595.736	478.55	274.939	275.665	254.342
ENSG00000128683.14	GAD1	225.599	-1.51307	0.180601	-8.37798	5.38438e-17	1.38862e-15	chr2:170813213-170861151	+	398.455	251.06	352.565	109.584	111.756	130.175
ENSG00000165995.22	CACNB2	143.075	-1.63285	0.194969	-8.37491	5.52682e-17	1.42369e-15	chr10:18140424-18543557	+	226.095	191.487	231.462	57.7273	73.5728	78.105
ENSG00000131016.17	AKAP12	10961	-1.40963	0.168741	-8.35382	6.60917e-17	1.69066e-15	chr6:151239967-151358559	+	19586.1	13769	14425.9	6228.68	5861.61	5894.92
ENSG00000166473.17	PKD1L2	50.4845	-3.08563	0.369675	-8.34688	7.00871e-17	1.79079e-15	chr16:81100875-81220370	-	104.43	91.4881	75.2008	11.7411	13.0382	7.00942
ENSG00000143768.13	LEFTY2	70.8051	2.48859	0.298459	8.33812	7.54838e-17	1.92423e-15	chr1:225936598-225941383	-	25.347	23.4039	15.6261	100.778	115.481	144.194
ENSG00000250634.6	LINC01182	45.9766	-3.49883	0.419627	-8.33794	7.55944e-17	1.92482e-15	chr4:13654374-14003756	+	81.1104	86.169	85.9437	4.89214	3.7252	14.0188
ENSG00000147588.7	PMP2	135.436	8.63789	1.0366	8.33289	7.88904e-17	2.00412e-15	chr8:81440326-81447439	-	1.01388	1.06381	0	326.795	238.413	245.33
ENSG00000153823.19	PID1	48.8701	-3.07592	0.372208	-8.26398	1.40891e-16	3.55058e-15	chr2:228850526-229271287	-	88.2076	95.7433	78.1307	14.6764	7.45041	9.01211
ENSG00000104140.7	RHOV	59.2813	-2.59757	0.314587	-8.25708	1.49275e-16	3.7533e-15	chr15:40872214-40874234	-	110.513	87.2328	107.43	15.6549	15.8321	19.0256
ENSG00000183508.5	TENT5C	1407.55	1.92724	0.233401	8.25722	1.49108e-16	3.7533e-15	chr1:117606048-117628389	+	547.495	443.611	766.657	2181.9	2242.57	2263.04
ENSG00000123358.20	NR4A1	66.3067	2.76553	0.335016	8.25491	1.52013e-16	3.8178e-15	chr12:52022832-52059507	+	22.3054	18.0848	10.743	83.1665	117.344	146.197
ENSG00000103257.9	SLC7A5	479.093	-1.26075	0.152911	-8.24501	1.65148e-16	4.14295e-15	chr16:87830023-87869507	-	820.229	588.29	620.162	284.723	340.856	220.296
ENSG00000122877.17	EGR2	240.971	1.5263	0.185351	8.23463	1.80118e-16	4.50827e-15	chr10:62811996-62919900	-	171.346	94.6795	106.453	377.674	376.246	319.429
ENSG00000173110.8	HSPA6	204.471	1.44328	0.175473	8.22511	1.95014e-16	4.86456e-15	chr1:161524540-161526894	+	120.652	93.6157	115.243	253.413	292.429	351.472
ENSG00000243244.7	STON1	541.723	-1.01291	0.123243	-8.2188	2.05552e-16	5.11586e-15	chr2:48529383-48598513	+	667.133	651.055	854.554	382.566	331.543	363.489
ENSG00000157625.15	TAB3	333.05	-1.05613	0.128913	-8.19255	2.55754e-16	6.35099e-15	chrX:30827442-30975084	-	448.135	471.27	429.719	223.082	192.779	233.314
ENSG00000158445.10	KCNB1	45.5536	-3.12451	0.38245	-8.16973	3.0909e-16	7.64106e-15	chr20:49293394-49484297	-	70.9716	88.2966	85.9437	9.78429	9.31301	9.01211
ENSG00000106546.14	AHR	51.2758	-6.29292	0.770556	-8.16673	3.1686e-16	7.8244e-15	chr7:16916359-17346152	+	106.457	84.0414	113.289	2.93529	0.931301	0
ENSG00000186832.9	KRT16	100.178	-2.04514	0.250725	-8.15689	3.43748e-16	8.45996e-15	chr17:41609778-41615899	-	150.054	126.594	207.046	36.2019	39.1146	42.0565
ENSG00000125246.15	CLYBL	88.5937	-1.94731	0.239713	-8.12349	4.52972e-16	1.1074e-14	chr13:99606669-99897134	+	138.902	130.849	152.355	38.1587	37.252	34.0458
ENSG00000249306.6	LINC01411	61.3673	2.51178	0.309489	8.11588	4.82286e-16	1.17516e-14	chr5:174336295-174532457	+	21.2915	18.0848	15.6261	96.8645	119.207	97.1306
ENSG00000286058.1	RP11-32C20.1	40.5627	-5.34811	0.659177	-8.11331	4.92573e-16	1.1989e-14	chr2:130026845-130051131	-	82.1243	84.0414	71.2942	3.91372	0	2.00269
ENSG00000147155.11	EBP	358.626	-1.01471	0.12527	-8.10021	5.48628e-16	1.3324e-14	chrX:48521799-48528716	+	476.524	505.312	458.041	237.758	259.833	214.288
ENSG00000169129.15	AFAP1L2	101.196	1.97622	0.244036	8.09808	5.58345e-16	1.35154e-14	chr10:114294824-114404756	-	29.4025	46.8078	46.8784	134.045	178.81	171.23
ENSG00000118515.12	SGK1	408.66	1.16048	0.143487	8.0877	6.08044e-16	1.46541e-14	chr6:134169248-134318112	-	284.9	210.635	261.738	649.677	471.238	573.771
ENSG00000154930.15	ACSS1	356.942	-1.06308	0.131763	-8.06818	7.13537e-16	1.71404e-14	chr20:25006230-25058980	-	468.413	442.547	537.148	206.448	233.757	253.341
ENSG00000106688.12	SLC1A1	315.016	1.0203	0.126466	8.06774	7.16091e-16	1.71831e-14	chr9:4490468-4587469	+	210.887	202.125	210.953	424.638	407.91	433.583
ENSG00000182389.20	CACNB4	78.423	2.1164	0.262797	8.05336	8.05504e-16	1.92658e-14	chr2:151832771-152099167	-	27.3748	24.4677	36.1354	129.153	132.245	121.163
ENSG00000198597.9	ZNF536	92.9058	1.88268	0.23392	8.0484	8.38865e-16	2.0042e-14	chr19:30228290-30713538	+	41.5691	37.2335	40.042	137.958	143.42	157.211
ENSG00000118473.23	SGIP1	145.072	-1.5685	0.195069	-8.04072	8.93111e-16	2.13149e-14	chr1:66533267-66751139	+	249.415	189.359	211.929	77.2959	63.3285	79.1063
ENSG00000102174.10	PHEX	200.261	-1.31876	0.164207	-8.03111	9.65909e-16	2.29531e-14	chrX:22032325-22494713	+	323.428	251.06	283.224	113.498	119.207	111.149
ENSG00000231628.1	RP3-355L5.4	64.0496	-2.40231	0.299122	-8.0312	9.65237e-16	2.29531e-14	chr6:105279016-105281755	+	115.582	101.062	106.453	14.6764	20.4886	26.035
ENSG00000113494.17	PRLR	42.2831	-3.44844	0.429572	-8.02763	9.93741e-16	2.35637e-14	chr5:35048756-35230487	-	71.9855	62.7651	97.6633	4.89214	8.38171	8.01077
ENSG00000041353.10	RAB27B	84.9235	-1.96566	0.245559	-8.00484	1.19617e-15	2.81822e-14	chr18:54717860-54895516	+	133.832	134.041	137.705	40.1156	29.8016	34.0458
ENSG00000281162.2	LINC01127	166.522	-1.619	0.202699	-7.98722	1.38015e-15	3.23512e-14	chr2:101962056-101987167	+	247.387	297.868	209	84.1449	99.6492	61.0821
ENSG00000082482.14	KCNK2	41.7236	-5.6619	0.709096	-7.98468	1.40887e-15	3.29821e-14	chr1:215005775-215237090	+	88.2076	84.0414	73.2475	3.91372	0.931301	0
ENSG00000258590.5	NBEAP1	189.312	1.30099	0.163052	7.97904	1.47477e-15	3.44885e-14	chr15:20657638-20688408	-	100.374	121.275	106.453	281.788	262.627	263.354
ENSG00000176788.9	BASP1	52.572	-2.71734	0.340677	-7.9763	1.5079e-15	3.52259e-14	chr5:17065598-17276843	+	102.402	77.6585	93.7568	10.7627	15.8321	15.0202
ENSG00000185262.9	UBALD2	216.833	1.25463	0.157421	7.96991	1.58792e-15	3.69777e-14	chr17:76265348-76271298	+	126.735	141.487	116.219	331.687	278.459	306.412
ENSG00000116774.12	OLFML3	153.911	1.51361	0.189922	7.96963	1.59145e-15	3.70209e-14	chr1:113979391-114035572	+	82.1243	72.3394	84.9671	192.75	257.97	233.314
ENSG00000147408.14	CSGALNACT1	284.692	1.08121	0.135699	7.96776	1.61578e-15	3.75078e-14	chr8:19404161-19758029	-	195.679	180.848	171.887	383.544	410.704	365.491
ENSG00000164850.15	GPER1	175.692	1.38724	0.174178	7.96449	1.65904e-15	3.84717e-14	chr7:1082208-1093815	+	101.388	91.4881	98.64	222.103	282.184	258.347
ENSG00000137393.10	RNF144B	138.274	-1.654	0.207939	-7.95428	1.80171e-15	4.16488e-14	chr6:18387350-18468870	+	172.36	226.593	230.485	55.7704	63.3285	81.109
ENSG00000174482.10	LINGO2	172.207	-1.44451	0.182026	-7.93573	2.09267e-15	4.80727e-14	chr9:27948078-28670286	-	271.72	268.081	215.836	108.606	82.8858	86.1158
ENSG00000196459.15	TRAPPC2	349.543	-1.0358	0.130706	-7.9247	2.287e-15	5.23732e-14	chrX:13712244-13734635	-	405.552	502.121	501.99	227.974	226.306	233.314
ENSG00000198929.13	NOS1AP	235.479	-1.28014	0.161845	-7.90967	2.5808e-15	5.89791e-14	chr1:162069691-162370475	+	325.456	326.591	348.658	105.67	145.283	161.217
ENSG00000182704.8	TSKU	243.096	-1.18987	0.150747	-7.8932	2.94527e-15	6.70307e-14	chr11:76782251-76798153	+	384.261	309.57	320.336	143.829	157.39	143.192
ENSG00000230438.7	SERPINB9P1	136.894	-1.65047	0.209161	-7.89093	2.99954e-15	6.81956e-14	chr6:2851230-2881407	-	207.845	191.487	223.649	45.9862	77.298	75.101
ENSG00000189050.16	RNFT1	395.206	1.01145	0.128242	7.88705	3.09415e-15	7.02742e-14	chr17:59952240-59964761	-	250.428	284.039	251.971	602.712	482.414	499.672
ENSG00000102221.14	JADE3	148.053	-1.43959	0.182555	-7.88578	3.12572e-15	7.09181e-14	chrX:46912276-47061242	+	200.748	214.891	233.415	75.339	83.8171	80.1077
ENSG00000265190.7	ANXA8	36.1618	-3.90679	0.496337	-7.87124	3.51143e-15	7.92622e-14	chr10:47460162-47484158	-	71.9855	54.2545	77.154	3.91372	4.65651	5.00673
ENSG00000142871.18	CCN1	211.971	-1.27297	0.161927	-7.86139	3.79909e-15	8.55803e-14	chr1:85580761-85584589	+	305.178	310.634	284.2	109.584	148.077	114.153
ENSG00000256229.8	ZNF486	40.3399	3.71253	0.472569	7.85605	3.96427e-15	8.92103e-14	chr19:20167214-20200488	+	7.09716	0	9.76633	71.4253	72.6415	81.109
ENSG00000071246.11	VASH1	227.641	1.14597	0.146287	7.8337	4.73729e-15	1.06281e-13	chr14:76761468-76783015	+	136.874	145.743	142.588	311.14	324.093	305.411
ENSG00000062038.15	CDH3	84.3056	-1.90474	0.243669	-7.81692	5.41331e-15	1.20956e-13	chr16:68636189-68727468	+	136.874	139.36	123.056	34.245	37.252	35.0471
ENSG00000121207.12	LRAT	42.0473	3.29507	0.422736	7.79463	6.45989e-15	1.43469e-13	chr4:154626945-154753120	+	6.08328	6.38289	10.743	93.9292	67.0537	68.0915
ENSG00000243970.3	PPIEL	64.6142	2.2559	0.289498	7.79247	6.57131e-15	1.45797e-13	chr1:39522280-39559671	-	21.2915	22.3401	23.4392	105.67	97.7866	117.157
ENSG00000106617.15	PRKAG2	136.688	-1.64422	0.21103	-7.7914	6.62725e-15	1.46891e-13	chr7:151556124-151877125	-	221.026	226.593	173.841	48.9214	72.6415	77.1036
ENSG00000163435.16	ELF3	54.5955	-6.80565	0.876135	-7.76781	7.98574e-15	1.76824e-13	chr1:202007945-202017183	+	120.652	82.9775	121.103	0.978429	1.8626	0
ENSG00000073849.16	ST6GAL1	240.226	-1.18921	0.153437	-7.75049	9.15406e-15	2.01682e-13	chr3:186930325-187078553	+	362.969	341.485	297.873	133.066	165.772	140.188
ENSG00000139970.17	RTN1	108.815	1.72328	0.222736	7.73686	1.01899e-14	2.22945e-13	chr14:59595976-59870776	-	60.8328	49.9993	41.0186	181.009	151.802	168.226
ENSG00000061337.15	LZTS1	478.178	1.05604	0.13665	7.72804	1.09212e-14	2.38709e-13	chr8:20246165-20303963	-	301.122	352.123	279.317	638.914	760.873	536.721
ENSG00000206190.12	ATP10A	47.0582	-3.08026	0.398883	-7.7222	1.14343e-14	2.49677e-13	chr15:25677271-25865184	-	80.0965	68.0841	104.5	10.7627	14.9008	4.00538
ENSG00000130203.10	APOE	139.144	1.51741	0.196848	7.70853	1.2728e-14	2.77104e-13	chr19:44905791-44909393	+	78.0688	62.7651	75.2008	183.945	235.619	199.268
ENSG00000042980.13	ADAM28	135.339	-1.50369	0.19533	-7.69819	1.38006e-14	2.99864e-13	chr8:24294069-24359014	+	225.081	191.487	183.607	71.4253	63.3285	77.1036
ENSG00000164342.13	TLR3	93.6422	1.845	0.239734	7.69605	1.40336e-14	3.0403e-13	chr4:186069155-186088073	+	31.4303	51.0631	40.042	152.635	142.489	144.194
ENSG00000147231.14	RADX	117.969	1.60807	0.209254	7.68478	1.53259e-14	3.31375e-13	chrX:106611930-106679439	+	48.6663	60.6374	65.4344	173.182	167.634	192.258
ENSG00000099284.15	MACROH2A2	211.259	1.21344	0.157958	7.68203	1.56582e-14	3.38196e-13	chr10:70052544-70112282	+	128.763	121.275	131.846	317.989	307.329	260.35
ENSG00000166897.16	ELFN2	51.5222	-2.68359	0.349339	-7.68192	1.5672e-14	3.38196e-13	chr22:37367960-37427479	-	89.2215	103.19	75.2008	8.80586	17.6947	15.0202
ENSG00000224189.8	HAGLR	104.215	1.81183	0.236094	7.67418	1.66475e-14	3.57849e-13	chr2:176164051-176188958	-	34.4719	58.5098	45.9018	169.268	176.947	140.188
ENSG00000198814.13	GK	329.713	-1.05639	0.13771	-7.67107	1.70568e-14	3.65934e-13	chrX:30653359-30731462	+	418.733	448.93	467.807	195.686	192.779	254.342
ENSG00000102048.16	ASB9	89.1822	-1.91859	0.250258	-7.66646	1.76807e-14	3.78951e-13	chrX:15235288-15270467	-	145.999	149.998	126.962	33.2666	29.8016	49.066
ENSG00000173334.4	TRIB1	4279.72	1.30539	0.170294	7.66552	1.78112e-14	3.81378e-13	chr8:125430358-125438403	+	2228.51	2176.56	2991.43	5831.44	6714.68	5735.71
ENSG00000123643.13	SLC36A1	194.892	1.22231	0.159502	7.66331	1.81207e-14	3.87628e-13	chr5:151437046-151492379	+	115.582	115.956	119.149	271.025	254.245	293.394
ENSG00000166387.14	PPFIBP2	172.863	-1.31537	0.171876	-7.65303	1.96302e-14	4.19513e-13	chr11:7513298-7657127	+	238.262	268.081	233.415	102.735	87.5423	107.144
ENSG00000198959.12	TGM2	77.0302	-2.59121	0.338712	-7.65019	2.00676e-14	4.28445e-13	chr20:38127385-38166578	-	189.596	129.785	77.154	14.6764	27.939	23.031
ENSG00000173227.14	SYT12	747.086	-1.04744	0.137163	-7.63649	2.23229e-14	4.75218e-13	chr11:67006778-67050863	+	1032.13	1206.37	783.26	428.552	561.575	470.633
ENSG00000198542.14	ITGBL1	95.3552	-9.09694	1.19485	-7.61343	2.66909e-14	5.66566e-13	chr13:101452593-101720856	+	184.526	212.763	173.841	0	0	1.00135
ENSG00000236404.11	VLDLR-AS1	63.5094	-2.32943	0.306147	-7.60884	2.7657e-14	5.85384e-13	chr9:2421597-2622457	-	89.2215	130.849	97.6633	21.5254	16.7634	25.0337
ENSG00000234840.2	LINC01239	127.819	1.52527	0.20067	7.60089	2.94104e-14	6.21306e-13	chr9:22646200-22824213	+	65.9022	74.467	57.6214	207.427	186.26	175.236
ENSG00000287560.1	RP11-118K6.5	121.336	-1.88184	0.248366	-7.57691	3.53893e-14	7.46184e-13	chr10:3042535-3047083	-	230.151	128.722	213.883	45.0077	65.1911	45.0606
ENSG00000262001.1	DLGAP1-AS2	166.192	1.45806	0.192568	7.57168	3.68437e-14	7.75368e-13	chr18:3603000-3608336	+	108.485	90.4242	67.3877	273.96	222.581	234.315
ENSG00000006016.12	CRLF1	230.599	1.2221	0.161458	7.56917	3.75618e-14	7.89728e-13	chr19:18572220-18607741	-	141.943	143.615	129.892	279.831	380.902	307.413
ENSG00000163734.4	CXCL3	129.149	1.80437	0.238524	7.56474	3.88653e-14	8.1558e-13	chr4:74036589-74038807	-	45.6246	39.3611	86.9204	204.492	200.23	198.267
ENSG00000231238.2	LINC00349	51.8049	9.11298	1.20619	7.55519	4.18262e-14	8.74389e-13	chr13:18538880-18551214	+	0	0	0	99.7997	109.894	101.136
ENSG00000180638.19	SLC47A2	54.4845	-2.74117	0.363001	-7.55142	4.30548e-14	8.99223e-13	chr17:19678288-19718979	-	133.832	74.467	76.1774	12.7196	17.6947	12.0162
ENSG00000069509.6	FUNDC1	291.158	-1.03137	0.136644	-7.54787	4.42427e-14	9.2316e-13	chrX:44523639-44542859	-	372.094	429.781	371.121	193.729	176.947	203.273
ENSG00000179542.16	SLITRK4	92.815	8.9898	1.19455	7.52566	5.24556e-14	1.09143e-12	chrX:143622790-143636101	-	1.01388	0	0	193.729	190.917	171.23
ENSG00000166448.15	TMEM130	34.8854	-5.39362	0.718538	-7.50638	6.07856e-14	1.26119e-12	chr7:98846488-98870771	-	68.9439	67.0203	68.3643	0.978429	0	4.00538
ENSG00000081051.8	AFP	35.6116	5.08519	0.677549	7.50527	6.12999e-14	1.27066e-12	chr4:73431138-73456174	+	4.05552	2.12763	0	90.0155	62.3972	55.074
ENSG00000188338.15	SLC38A3	127.77	-1.51574	0.202035	-7.50238	6.267e-14	1.29784e-12	chr3:50205246-50221486	+	173.374	191.487	203.14	53.8136	71.7102	73.0983
ENSG00000134516.18	DOCK2	34.4143	-3.8378	0.512307	-7.49121	6.82436e-14	1.40536e-12	chr5:169637268-170083382	+	55.7634	55.3184	82.0372	3.91372	7.45041	2.00269
ENSG00000067082.15	KLF6	356.165	-1.14282	0.152777	-7.48035	7.41248e-14	1.52363e-12	chr10:3775996-3785281	-	602.245	382.973	485.387	231.888	214.199	220.296
ENSG00000144218.21	AFF3	79.1294	-1.91312	0.255764	-7.48	7.43238e-14	1.5263e-12	chr2:99545419-100192428	-	117.61	129.785	127.939	35.2234	38.1833	26.035
ENSG00000198719.9	DLL1	174.849	1.30286	0.174585	7.46258	8.48433e-14	1.73426e-12	chr6:170282206-170306565	-	98.3464	111.701	92.7802	217.211	261.696	267.359
ENSG00000134897.14	BIVM	223.042	-1.10181	0.14767	-7.4613	8.56742e-14	1.74962e-12	chr13:102799119-102841533	+	293.011	307.442	312.523	147.743	144.352	133.179
ENSG00000142619.4	PADI3	72.2508	-7.79808	1.04598	-7.45525	8.96976e-14	1.82504e-12	chr1:17249098-17284233	+	167.29	138.296	125.986	0	0.931301	1.00135
ENSG00000186462.9	NAP1L2	119.842	1.7239	0.231464	7.44779	9.49137e-14	1.92761e-12	chrX:73212299-73214851	-	67.93	56.3822	42.9719	222.103	183.466	146.197
ENSG00000163485.17	ADORA1	155.412	-1.4142	0.190094	-7.43952	1.01052e-13	2.0485e-12	chr1:203090654-203167405	+	237.248	221.273	219.743	64.5763	101.512	88.1184
ENSG00000142910.16	TINAGL1	45.3401	-6.53192	0.882083	-7.40511	1.31046e-13	2.63477e-12	chr1:31576485-31587686	+	106.457	90.4242	72.2709	1.95686	0.931301	0
ENSG00000165821.12	SALL2	306.22	-1.1052	0.149284	-7.40334	1.32804e-13	2.66768e-12	chr14:21521080-21537216	-	452.191	385.101	417.022	151.656	216.062	215.289
ENSG00000168268.11	NT5DC2	280.797	-1.04104	0.140854	-7.39093	1.45811e-13	2.92629e-12	chr3:52524385-52535054	-	405.552	341.485	386.747	164.376	198.367	188.253
ENSG00000091137.14	SLC26A4	108.018	1.68089	0.227908	7.37531	1.63961e-13	3.28457e-12	chr7:107660828-107717809	+	54.7495	40.425	58.598	191.772	144.352	158.213
ENSG00000165757.9	JCAD	229.17	1.11746	0.15152	7.375	1.64342e-13	3.28923e-12	chr10:30012803-30115494	-	131.804	158.508	143.565	312.119	290.566	338.455
ENSG00000175198.17	PCCA	291.837	-1.01482	0.137761	-7.36654	1.75109e-13	3.49206e-12	chr13:100089015-100530437	+	402.511	344.676	423.859	184.923	192.779	202.272
ENSG00000176170.14	SPHK1	251.24	1.04999	0.142583	7.36409	1.78361e-13	3.5537e-12	chr17:76376584-76387860	+	171.346	157.445	162.121	363.976	337.131	315.424
ENSG00000184307.17	ZDHHC23	224.567	1.10863	0.150975	7.34312	2.0867e-13	4.14262e-12	chr3:113947901-113965401	+	143.971	153.189	129.892	319.946	284.978	315.424
ENSG00000143674.11	MAP3K21	239.037	-1.10062	0.149899	-7.34245	2.09721e-13	4.15975e-12	chr1:233327724-233385148	+	341.678	289.358	346.705	158.505	138.764	159.214
ENSG00000187773.9	DIPK1C	97.9386	1.96158	0.267182	7.34174	2.10834e-13	4.17806e-12	chr18:74434775-74457944	-	59.8189	31.9144	28.3224	129.153	160.184	178.24
ENSG00000145990.11	GFOD1	300.151	-1.12911	0.155604	-7.2563	3.97817e-13	7.78565e-12	chr6:13357830-13487662	-	320.386	432.973	482.457	181.988	191.848	191.257
ENSG00000239922.2	RP11-71N10.1	99.0878	1.7883	0.246783	7.24643	4.27907e-13	8.35971e-12	chr3:147939905-148007127	+	31.4303	54.2545	47.855	176.117	126.657	158.213
ENSG00000131771.14	PPP1R1B	43.6027	-2.6526	0.366225	-7.2431	4.38547e-13	8.56e-12	chr17:39626740-39636626	+	80.0965	72.3394	73.2475	8.80586	12.1069	15.0202
ENSG00000197410.14	DCHS2	41.2779	2.83102	0.390888	7.24253	4.40377e-13	8.58813e-12	chr4:154231742-154491799	-	12.1666	9.57433	8.7897	60.6626	76.3667	80.1077
ENSG00000204542.3	C6orf15	207.466	-1.47469	0.204011	-7.22849	4.88381e-13	9.5075e-12	chr6:31111223-31112575	-	333.567	348.931	233.415	127.196	127.588	74.0996
ENSG00000225783.8	MIAT	67.3305	-1.98517	0.27558	-7.2036	5.86445e-13	1.13764e-11	chr22:26646411-26676475	+	111.527	94.6795	116.219	28.3744	25.1451	28.0377
ENSG00000117477.12	CCDC181	125.855	1.43025	0.198623	7.20084	5.98407e-13	1.15881e-11	chr1:169394870-169460669	-	66.9161	67.0203	70.3176	197.643	162.978	190.256
ENSG00000163053.11	SLC16A14	83.3851	-1.76891	0.246047	-7.18929	6.5127e-13	1.25897e-11	chr2:230034982-230068993	-	113.555	140.424	132.822	42.0724	35.3894	36.0485
ENSG00000178163.8	ZNF518B	38.0069	-8.73579	1.21707	-7.17775	7.08705e-13	1.36522e-11	chr4:10439880-10457426	-	74.0133	68.0841	85.9437	0	0	0
ENSG00000173926.6	MARCHF3	61.2814	2.27846	0.319821	7.12417	1.04707e-12	1.98412e-11	chr5:126867714-127030558	-	27.3748	13.8296	21.4859	77.2959	114.55	113.152
ENSG00000245848.3	CEBPA	157.632	-1.32666	0.186447	-7.11549	1.11514e-12	2.10769e-11	chr19:33299934-33302534	-	250.428	205.316	220.719	85.1233	107.1	77.1036
ENSG00000163803.13	PLB1	80.4065	-1.82172	0.256379	-7.10556	1.19835e-12	2.25916e-11	chr2:28457145-28644142	+	117.61	141.487	117.196	30.3313	43.7712	32.0431
ENSG00000254343.2	RP11-760H22.2	99.1132	-1.74706	0.246183	-7.09657	1.27895e-12	2.40085e-11	chr8:120052180-120056201	+	116.596	152.126	189.467	39.1372	50.2903	47.0633
ENSG00000150054.19	MPP7	74.2304	1.87125	0.264115	7.08499	1.39054e-12	2.60369e-11	chr10:28050993-28334486	-	26.3609	34.0421	35.1588	120.347	104.306	125.168
ENSG00000151952.16	TMEM132D	36.7606	8.6172	1.21844	7.07232	1.5236e-12	2.84559e-11	chr12:129071725-129904025	-	0	0	0	66.5332	68.9163	85.1144
ENSG00000111058.8	ACSS3	44.2547	2.64707	0.374348	7.07115	1.53654e-12	2.86733e-11	chr12:80936414-81261210	+	9.12492	12.7658	14.6495	62.6194	91.2675	75.101
ENSG00000109452.12	INPP4B	35.0087	-8.61692	1.22014	-7.06224	1.63836e-12	3.04962e-11	chr4:142023160-142847432	-	62.8606	68.0841	79.1073	0	0	0
ENSG00000141497.14	ZMYND15	77.2353	1.84653	0.261688	7.05622	1.71093e-12	3.17665e-11	chr17:4739833-4746119	+	34.4719	37.2335	29.299	107.627	140.626	114.153
ENSG00000152495.11	CAMK4	99.2731	1.76811	0.250663	7.05374	1.74173e-12	3.223e-11	chr5:111223653-111494886	+	27.3748	52.1269	55.6681	172.203	148.077	140.188
ENSG00000132204.14	LINC00470	34.4156	-8.59165	1.21957	-7.04483	1.85687e-12	3.43032e-11	chr18:1254383-1408344	-	69.9577	69.148	67.3877	0	0	0
ENSG00000231114.1	AC078842.4	115.292	-1.46993	0.208675	-7.04414	1.86608e-12	3.44156e-11	chr7:137318592-137326953	+	160.193	182.976	165.051	52.8352	59.6033	71.0956
ENSG00000112320.12	SOBP	151.705	1.33054	0.188939	7.04216	1.89279e-12	3.48704e-11	chr6:107490106-107661306	+	79.0827	81.9137	97.6633	212.319	190.917	248.334
ENSG00000152689.18	RASGRP3	49.3563	2.58363	0.368249	7.01597	2.28355e-12	4.18007e-11	chr2:33436324-33564750	+	12.1666	6.38289	23.4392	87.0802	81.9545	85.1144
ENSG00000003147.19	ICA1	30.1798	5.11848	0.73146	6.99762	2.60354e-12	4.75005e-11	chr7:8113184-8262687	-	0	1.06381	3.90653	61.641	62.3972	52.07
ENSG00000280109.3	PLAC4	62.1041	-2.21743	0.317019	-6.99462	2.65985e-12	4.84879e-11	chr21:41175231-41186788	-	100.374	85.1052	121.103	12.7196	23.2825	30.0404
ENSG00000122756.15	CNTFR	28.4883	-3.77893	0.540428	-6.99247	2.7009e-12	4.91955e-11	chr9:34551432-34590140	-	50.694	51.0631	57.6214	4.89214	4.65651	2.00269
ENSG00000249035.7	CLMAT3	320.461	1.10478	0.158201	6.98343	2.88062e-12	5.22965e-11	chr5:151676945-151725473	+	203.79	188.295	217.789	358.105	406.047	548.738
ENSG00000139832.5	RAB20	181.742	-1.23213	0.176529	-6.97979	2.95627e-12	5.36259e-11	chr13:110523066-110561722	-	305.178	222.337	237.322	103.713	111.756	110.148
ENSG00000129422.14	MTUS1	132.049	-1.4156	0.203291	-6.96341	3.32128e-12	5.99586e-11	chr8:17643795-17800917	-	228.123	186.168	162.121	74.3606	75.4354	66.0888
ENSG00000139835.14	GRTP1	37.148	-2.85659	0.410468	-6.95936	3.41826e-12	6.15509e-11	chr13:113324163-113364148	-	72.9994	58.5098	64.4578	8.80586	12.1069	6.00808
ENSG00000232803.1	SLCO4A1-AS1	37.6717	-3.20396	0.460683	-6.9548	3.53073e-12	6.33695e-11	chr20:62663019-62666724	-	85.166	44.6802	74.2241	6.849	12.1069	3.00404
ENSG00000236824.2	BCYRN1	84.052	-1.68909	0.242888	-6.9542	3.54569e-12	6.35863e-11	chr2:47335315-47335514	+	124.707	136.168	124.032	46.9646	35.3894	37.0498
ENSG00000136244.12	IL6	132.453	1.42234	0.204989	6.93865	3.95867e-12	7.08198e-11	chr7:22725884-22732002	+	60.8328	64.8927	89.8503	191.772	175.085	212.285
ENSG00000006042.12	TMEM98	28.1543	-4.20023	0.609776	-6.88816	5.65178e-12	1.00135e-10	chr17:32927910-32945106	+	62.8606	56.3822	41.0186	5.87057	2.7939	0
ENSG00000019549.13	SNAI2	30.4966	3.35813	0.488031	6.88098	5.94418e-12	1.05147e-10	chr8:48917598-48921740	-	7.09716	4.25526	4.88317	51.8567	56.8094	58.0781
ENSG00000139910.20	NOVA1	30.9488	-8.43907	1.2274	-6.87555	6.17498e-12	1.08881e-10	chr14:26443090-26598033	-	49.6801	62.7651	73.2475	0	0	0
ENSG00000052850.8	ALX4	157.294	-1.23155	0.179524	-6.86005	6.88353e-12	1.21084e-10	chr11:44260440-44310139	-	209.873	225.529	226.579	78.2743	103.374	100.135
ENSG00000088538.13	DOCK3	250.339	1.0322	0.150478	6.85945	6.91284e-12	1.21503e-10	chr3:50674927-51384198	+	138.902	175.529	178.724	322.882	318.505	367.494
ENSG00000276851.1	RP5-875H18.9	196.423	1.3098	0.191923	6.82463	8.81523e-12	1.53717e-10	chr17:50094065-50094647	+	115.582	131.913	91.8035	289.615	334.337	215.289
ENSG00000120217.14	CD274	75.4426	1.82017	0.267253	6.81067	9.71443e-12	1.68863e-10	chr9:5450503-5470566	+	40.5552	34.0421	25.3925	130.131	103.374	119.16
ENSG00000286540.1	RP11-96C13.1	84.8043	1.67615	0.246285	6.80575	1.00527e-11	1.7395e-10	chr6:120462511-120706789	+	47.6524	41.4888	32.2289	136.002	118.275	133.179
ENSG00000176842.15	IRX5	115.133	-1.48373	0.218672	-6.78518	1.15939e-11	1.99026e-10	chr16:54930865-54934485	+	180.471	132.977	195.327	59.6842	64.2598	58.0781
ENSG00000145824.13	CXCL14	26.3469	-4.48183	0.661029	-6.78007	1.20117e-11	2.05877e-10	chr5:135570679-135579279	-	53.7357	59.5736	38.0887	1.95686	3.7252	1.00135
ENSG00000111057.11	KRT18	29.0332	-8.34594	1.23985	-6.73144	1.67997e-11	2.85504e-10	chr12:52948871-52952906	+	34.4719	72.3394	67.3877	0	0	0
ENSG00000237515.9	SHISA9	95.3544	-1.64321	0.24442	-6.72287	1.78181e-11	3.02113e-10	chr16:12901598-13240416	+	133.832	138.296	161.145	62.6194	38.1833	38.0511
ENSG00000132386.11	SERPINF1	61.1099	-1.94468	0.28936	-6.7206	1.80977e-11	3.06149e-10	chr17:1762029-1777565	+	87.1937	91.4881	112.313	26.4176	24.2138	25.0337
ENSG00000169891.18	REPS2	46.1265	-2.40902	0.359779	-6.69582	2.14462e-11	3.59488e-10	chrX:16946658-17153272	+	65.9022	93.6157	73.2475	15.6549	9.31301	19.0256
ENSG00000223804.5	CH17-472G23.2	43.891	2.37358	0.354605	6.69358	2.17779e-11	3.64496e-10	chr1:120267334-120341871	-	14.1943	11.702	16.6028	79.2527	74.5041	67.0902
ENSG00000228459.4	LINC01546	41.353	-2.51669	0.376029	-6.69281	2.18925e-11	3.66136e-10	chrX:3271544-3286138	+	77.0549	75.5308	58.598	8.80586	12.1069	16.0215
ENSG00000124839.13	RAB17	28.2195	-5.41807	0.809712	-6.69136	2.21108e-11	3.69226e-10	chr2:237574322-237601614	-	71.9855	44.6802	48.8317	1.95686	1.8626	0
ENSG00000171791.14	BCL2	172.831	-1.18372	0.177919	-6.65317	2.86853e-11	4.73641e-10	chr18:63123346-63320128	-	198.721	246.805	274.434	103.713	106.168	107.144
ENSG00000198691.13	ABCA4	30.8662	3.47799	0.522785	6.65282	2.87537e-11	4.74414e-10	chr1:93992834-94121148	-	11.1527	2.12763	1.95327	63.5979	50.2903	56.0754
ENSG00000078053.17	AMPH	47.8094	8.03013	1.20806	6.64715	2.98825e-11	4.92303e-10	chr7:38383704-38631420	-	1.01388	0	0	93.9292	97.7866	94.1265
ENSG00000128833.13	MYO5C	117.361	-1.34402	0.202674	-6.63144	3.3243e-11	5.44416e-10	chr15:52192322-52295804	-	178.443	159.572	167.004	73.3822	58.672	67.0902
ENSG00000163545.11	NUAK2	197.02	-1.12299	0.169735	-6.61611	3.68778e-11	6.0038e-10	chr1:205302063-205321745	-	261.581	271.273	277.364	95.886	137.833	138.186
ENSG00000160271.16	RALGDS	140.273	-1.22837	0.186349	-6.59177	4.34626e-11	7.06019e-10	chr9:133097720-133149334	-	181.485	206.38	202.163	89.037	88.4736	74.0996
ENSG00000158258.16	CLSTN2	30.4641	3.16408	0.480794	6.58095	4.67444e-11	7.57657e-10	chr3:139935185-140577397	+	3.04164	8.51052	6.83643	56.7489	46.5651	61.0821
ENSG00000146006.8	LRRTM2	116.552	1.47262	0.224256	6.56668	5.1448e-11	8.28422e-10	chr5:138868921-138875368	-	64.8883	44.6802	75.2008	172.203	148.077	194.261
ENSG00000260850.2	RP11-437L7.1	104.545	1.46003	0.222859	6.55135	5.70205e-11	9.14815e-10	chr16:51354456-51525157	-	54.7495	62.7651	49.8083	144.807	136.901	178.24
ENSG00000139826.6	ABHD13	247.437	-1.00817	0.154404	-6.52941	6.60281e-11	1.05397e-09	chr13:108218392-108234243	+	360.941	313.825	316.429	178.074	134.107	181.244
ENSG00000133101.10	CCNA1	82.2174	1.59409	0.244756	6.513	7.36622e-11	1.17159e-09	chr13:36431520-36442870	+	40.5552	36.1697	45.9018	114.476	135.039	121.163
ENSG00000276115.1	RP11-817I4.2	108.809	-1.38783	0.214389	-6.47341	9.58156e-11	1.51304e-09	chr12:32352349-32354144	+	166.276	172.338	133.799	56.7489	59.6033	64.0861
ENSG00000196368.5	NUDT11	212.426	1.06686	0.164818	6.47296	9.61034e-11	1.5165e-09	chrX:51490011-51496592	-	147.013	114.892	149.425	307.227	249.589	306.412
ENSG00000102678.7	FGF9	25.1335	-5.24406	0.81023	-6.47231	9.65186e-11	1.52196e-09	chr13:21671073-21704498	+	51.7079	41.4888	53.7148	1.95686	0.931301	1.00135
ENSG00000154175.18	ABI3BP	166.724	-1.1624	0.179622	-6.47134	9.71365e-11	1.53061e-09	chr3:100749156-100993515	-	221.026	209.571	260.761	87.0802	111.756	110.148
ENSG00000287996.1	RP11-67L17.1	39.7574	6.86418	1.06275	6.4589	1.05464e-10	1.65247e-09	chr13:63397011-63513393	+	0	0	1.95327	85.1233	76.3667	75.101
ENSG00000095951.17	HIVEP1	163.336	1.15339	0.178682	6.45499	1.08229e-10	1.69451e-09	chr6:12008762-12164999	+	102.402	82.9775	118.173	229.931	227.237	219.295
ENSG00000080031.10	PTPRH	104.94	-1.49021	0.231677	-6.43227	1.25709e-10	1.95709e-09	chr19:55181247-55209506	-	182.498	140.424	141.612	43.0509	67.985	54.0727
ENSG00000164142.16	FAM160A1	199.586	-1.35082	0.210085	-6.42986	1.27718e-10	1.98696e-09	chr4:151409176-151670503	+	387.302	204.252	268.574	132.088	106.168	99.1333
ENSG00000237773.7	AC003075.4	22.2627	-7.96256	1.2427	-6.40745	1.47973e-10	2.29399e-09	chr7:16970320-17299368	-	39.5413	51.0631	42.9719	0	0	0
ENSG00000231703.2	RP4-669H2.1	23.591	-4.31329	0.674458	-6.39519	1.6035e-10	2.48239e-09	chr20:53397661-53412910	-	32.4442	57.446	44.9251	2.93529	2.7939	1.00135
ENSG00000146950.13	SHROOM2	227.203	-1.02476	0.160311	-6.39236	1.63342e-10	2.52517e-09	chrX:9786429-9949443	+	305.178	353.186	255.878	140.894	150.871	157.211
ENSG00000004848.8	ARX	26.4735	-3.52836	0.552296	-6.38853	1.6749e-10	2.58567e-09	chrX:25003694-25016420	-	60.8328	51.0631	34.1822	4.89214	1.8626	6.00808
ENSG00000198846.6	TOX	28.5132	-3.3245	0.520448	-6.38777	1.68326e-10	2.59677e-09	chr8:58805412-59119147	-	35.4858	58.5098	61.5279	1.95686	5.58781	8.01077
ENSG00000251026.2	LINC02163	22.6092	7.91664	1.2399	6.38492	1.71483e-10	2.63994e-09	chr5:104079847-104406121	+	0	0	0	44.0293	46.5651	45.0606
ENSG00000239713.9	APOBEC3G	35.919	-6.78428	1.06594	-6.36458	1.95828e-10	3.00633e-09	chr22:39077067-39087743	+	67.93	73.4032	72.2709	0.978429	0.931301	0
ENSG00000185567.7	AHNAK2	1575.63	-1.34535	0.212042	-6.34475	2.2279e-10	3.39427e-09	chr14:104937244-104978374	-	2781.07	1879.76	2123.2	770.024	1036.54	863.16
ENSG00000233355.7	CHRM3-AS2	22.523	-4.23565	0.668415	-6.33685	2.34509e-10	3.56789e-09	chr1:239703381-239770130	-	41.5691	44.6802	41.9952	1.95686	0.931301	4.00538
ENSG00000162946.23	DISC1	70.4256	1.7321	0.273852	6.32496	2.53306e-10	3.84592e-09	chr1:231626790-232041272	+	33.4581	34.0421	30.2756	92.9507	99.6492	132.178
ENSG00000160963.14	COL26A1	106.798	-1.40624	0.22298	-6.30657	2.85287e-10	4.30779e-09	chr7:101362875-101559024	+	152.082	149.998	163.098	43.0509	61.4659	71.0956
ENSG00000169297.8	NR0B1	20.7735	-7.86433	1.25061	-6.28838	3.20787e-10	4.8142e-09	chrX:30304206-30309390	-	51.7079	31.9144	41.0186	0	0	0
ENSG00000283498.1	MIR1244-2	93.6901	-1.45394	0.231227	-6.28793	3.21726e-10	4.82501e-09	chr5:118974586-118974670	+	137.888	123.403	150.402	59.6842	44.7025	46.0619
ENSG00000259048.1	CTD-2058B24.2	23.4838	-4.09969	0.652085	-6.28704	3.23574e-10	4.84944e-09	chr14:38034287-38194281	-	49.6801	53.1907	30.2756	4.89214	1.8626	1.00135
ENSG00000101187.16	SLCO4A1	140.178	-1.50582	0.239537	-6.2864	3.24912e-10	4.86618e-09	chr20:62642503-62685785	+	279.831	134.041	208.023	83.1665	68.9163	67.0902
ENSG00000170689.10	HOXB9	50.31	2.04122	0.325813	6.26502	3.72784e-10	5.55678e-09	chr17:48621156-48626358	-	25.347	18.0848	15.6261	74.3606	90.3362	78.105
ENSG00000280660.1	RP11-437J2.3	36.3813	-7.70509	1.23002	-6.26422	3.74697e-10	5.58152e-09	chr10:93762453-93771991	+	46.6385	69.148	101.57	0	0.931301	0
ENSG00000149256.16	TENM4	40.4267	2.35688	0.376493	6.26009	3.84765e-10	5.72377e-09	chr11:78652829-79441030	-	9.12492	13.8296	16.6028	58.7057	65.1911	79.1063
ENSG00000128052.10	KDR	39.966	-2.29559	0.367466	-6.24708	4.182e-10	6.19593e-09	chr4:55078481-55125595	-	70.9716	64.8927	63.4812	11.7411	17.6947	11.0148
ENSG00000145703.16	IQGAP2	180.215	-1.02437	0.164243	-6.23688	4.46391e-10	6.58726e-09	chr5:76403285-76708132	+	230.151	242.55	251.971	120.347	107.1	129.174
ENSG00000135144.7	DTX1	26.404	-3.19654	0.512761	-6.23398	4.5472e-10	6.69673e-09	chr12:113056709-113098028	+	54.7495	48.9355	39.0653	5.87057	2.7939	7.00942
ENSG00000131981.16	LGALS3	1880.5	-1.2328	0.197882	-6.23	4.66427e-10	6.85999e-09	chr14:55124110-55145423	+	3277.88	2064.86	2572.45	1127.15	1189.27	1051.41
ENSG00000165474.8	GJB2	237.056	-1.09954	0.176545	-6.22806	4.72248e-10	6.94097e-09	chr13:20187463-20192938	-	346.747	375.527	248.065	138.937	177.879	135.182
ENSG00000132185.18	FCRLA	27.1604	3.38444	0.545548	6.20374	5.5138e-10	8.05044e-09	chr1:161706972-161714352	+	8.11104	3.19144	2.9299	68.49	38.1833	42.0565
ENSG00000144406.19	UNC80	201.449	-1.04484	0.168472	-6.20187	5.57965e-10	8.13045e-09	chr2:209771832-209999300	+	226.095	273.4	314.476	140.894	126.657	127.171
ENSG00000112936.19	C7	68.894	7.66028	1.23581	6.19861	5.69658e-10	8.29536e-09	chr5:40909497-40984643	+	2.02776	0	0	196.664	61.4659	153.206
ENSG00000165194.15	PCDH19	22.2043	-5.06125	0.821197	-6.16327	7.126e-10	1.02954e-08	chrX:100291644-100410273	-	36.4997	48.9355	43.9485	0.978429	1.8626	1.00135
ENSG00000149294.17	NCAM1	276.131	1.09127	0.177271	6.15594	7.46322e-10	1.07755e-08	chr11:112961247-113278436	+	168.304	170.21	190.444	279.831	361.345	486.654
ENSG00000106415.13	GLCCI1	102.01	1.39399	0.226887	6.14396	8.04869e-10	1.15981e-08	chr7:7968796-8094272	+	60.8328	51.0631	56.6447	170.247	121.069	152.205
ENSG00000205683.12	DPF3	102.562	1.47401	0.240105	6.13901	8.30352e-10	1.19432e-08	chr14:72609034-72894101	-	69.9577	48.9355	43.9485	170.247	121.069	161.217
ENSG00000134258.17	VTCN1	27.837	-3.01955	0.49277	-6.12771	8.9155e-10	1.27804e-08	chr1:117143587-117210960	-	60.8328	36.1697	51.7616	5.87057	8.38171	4.00538
ENSG00000163762.7	TM4SF18	88.558	-1.70191	0.278162	-6.11842	9.45088e-10	1.35128e-08	chr3:149318498-149334414	-	148.027	126.594	131.846	63.5979	37.252	24.0323
ENSG00000134198.10	TSPAN2	86.6083	-1.43513	0.234683	-6.11516	9.64615e-10	1.37831e-08	chr1:115048011-115089503	-	128.763	114.892	135.752	46.9646	51.2216	42.0565
ENSG00000265185.6	SNORD3B-1	123.344	1.43673	0.23559	6.09845	1.07099e-09	1.52636e-08	chr17:19061912-19062669	+	92.2631	43.6164	63.4812	207.427	162.046	171.23
ENSG00000178776.5	C5orf46	54.0934	-1.95709	0.322098	-6.07608	1.23159e-09	1.74846e-08	chr5:147880726-147906538	-	90.2354	85.1052	83.0138	18.5901	32.5955	15.0202
ENSG00000180178.11	FAR2P1	21.8303	-4.2067	0.693345	-6.06725	1.30115e-09	1.8413e-08	chr2:130012065-130040560	-	42.583	32.9783	48.8317	0	5.58781	1.00135
ENSG00000113389.16	NPR3	46.668	2.33123	0.384488	6.06322	1.33424e-09	1.88691e-08	chr5:32689070-32791724	+	19.2637	6.38289	20.5093	103.713	67.0537	63.0848
ENSG00000151883.19	PARP8	24.1109	3.59061	0.593187	6.05308	1.42105e-09	2.00326e-08	chr5:50665899-50846519	+	4.05552	0	6.83643	53.8136	41.9086	38.0511
ENSG00000135638.14	EMX1	89.3055	1.51694	0.250633	6.05244	1.42666e-09	2.00989e-08	chr2:72916260-72936071	+	35.4858	59.5736	43.9485	110.562	148.077	138.186
ENSG00000134864.11	GGACT	94.2038	-1.46274	0.241971	-6.04512	1.49302e-09	2.09877e-08	chr13:100530164-100589528	-	133.832	129.785	151.378	40.1156	67.0537	43.0579
ENSG00000183087.15	GAS6	166.953	-1.21431	0.20109	-6.03862	1.55437e-09	2.1773e-08	chr13:113820549-113864076	-	270.706	211.699	217.789	70.4469	122.932	108.145
ENSG00000155849.16	ELMO1	21.3649	-5.00001	0.828949	-6.03175	1.6219e-09	2.26328e-08	chr7:36852906-37449223	-	30.4164	48.9355	44.9251	0.978429	0.931301	2.00269
ENSG00000171722.13	SPATA46	67.2581	-1.70945	0.283836	-6.02268	1.71556e-09	2.38194e-08	chr1:162373203-162376854	-	96.3186	108.509	104.5	26.4176	43.7712	24.0323
ENSG00000147509.14	RGS20	46.0513	-2.19806	0.365209	-6.01863	1.75902e-09	2.44074e-08	chr8:53851795-53959303	+	50.694	75.5308	100.593	19.5686	14.9008	15.0202
ENSG00000126216.15	TUBGCP3	187.94	-1.01132	0.168039	-6.01838	1.76177e-09	2.44301e-08	chr13:112485011-112588205	-	230.151	264.89	258.808	103.713	136.901	133.179
ENSG00000175445.17	LPL	98.0668	1.64365	0.273509	6.00948	1.86115e-09	2.57759e-08	chr8:19901717-19967259	+	30.4164	42.5526	69.341	134.045	124.794	187.252
ENSG00000105711.14	SCN1B	198.053	1.01084	0.168289	6.00654	1.8952e-09	2.62145e-08	chr19:35030470-35040449	+	117.61	132.977	143.565	226.995	300.81	266.358
ENSG00000214111.3	PAFAH1B2P1	21.2438	-3.94609	0.658002	-5.99708	2.00892e-09	2.77008e-08	chrX:25029545-25030235	+	39.5413	36.1697	43.9485	5.87057	0.931301	1.00135
ENSG00000101096.20	NFATC2	30.4768	2.62641	0.438119	5.99475	2.03797e-09	2.80663e-08	chr20:51386957-51562831	-	7.09716	10.6381	7.81307	47.943	50.2903	59.0794
ENSG00000145416.13	MARCHF1	171.222	-1.07921	0.18008	-5.99293	2.06089e-09	2.83298e-08	chr4:163524298-164384050	-	249.415	210.635	237.322	129.153	112.687	88.1184
ENSG00000059377.18	TBXAS1	67.553	1.78752	0.298341	5.99152	2.07891e-09	2.85248e-08	chr7:139777051-140020325	+	38.5275	19.1487	33.2055	102.735	127.588	84.1131
ENSG00000244128.7	LINC01322	29.8522	7.34811	1.2266	5.99063	2.09029e-09	2.86439e-08	chr3:165206929-165846519	+	0	0	0.976633	66.5332	60.5346	51.0686
ENSG00000128652.12	HOXD3	103.753	1.28766	0.215452	5.97653	2.27942e-09	3.11775e-08	chr2:176136612-176173102	+	67.93	54.2545	58.598	140.894	140.626	160.215
ENSG00000070731.11	ST6GALNAC2	69.8957	-1.54886	0.260096	-5.95494	2.60174e-09	3.53235e-08	chr17:76565377-76586956	-	109.499	105.318	97.6633	34.245	32.5955	40.0538
ENSG00000151025.11	GPR158	80.918	1.75881	0.295496	5.95206	2.64791e-09	3.59061e-08	chr10:25174802-25602229	+	39.5413	17.021	53.7148	138.937	120.138	116.156
ENSG00000103460.17	TOX3	16.6819	-7.54581	1.26811	-5.95043	2.67436e-09	3.62204e-08	chr16:52436417-52547802	-	24.3331	42.5526	33.2055	0	0	0
ENSG00000152822.14	GRM1	182.742	1.0988	0.184932	5.94164	2.82187e-09	3.81166e-08	chr6:146027646-146437601	+	117.61	89.3604	141.612	220.146	279.39	248.334
ENSG00000269902.1	RP6-99M1.3	34.7667	-2.42284	0.408051	-5.9376	2.89222e-09	3.89796e-08	chrX:45764772-45765299	-	55.7634	60.6374	59.5746	6.849	16.7634	9.01211
ENSG00000225768.1	LINC02620	80.6943	-1.44551	0.243671	-5.93221	2.98879e-09	4.02565e-08	chr10:104474939-104480274	-	128.763	115.956	109.383	38.1587	42.8399	49.066
ENSG00000075275.18	CELSR1	49.6106	-1.9227	0.32412	-5.93206	2.99149e-09	4.02683e-08	chr22:46360834-46537620	-	78.0688	86.169	71.2942	14.6764	21.4199	26.035
ENSG00000204540.11	PSORS1C1	88.1762	1.46174	0.246623	5.92705	3.08421e-09	4.14659e-08	chr6:31114750-31140092	+	50.694	56.3822	34.1822	132.088	141.558	114.153
ENSG00000154721.15	JAM2	100.304	1.30786	0.221901	5.8939	3.77176e-09	5.03419e-08	chr21:25639258-25717562	+	63.8745	58.5098	50.7849	151.656	124.794	152.205
ENSG00000143369.15	ECM1	159.514	1.10112	0.187072	5.88609	3.95444e-09	5.2621e-08	chr1:150508062-150513789	+	96.3186	106.381	101.57	181.988	210.474	260.35
ENSG00000170412.18	GPRC5C	54.9291	-1.79968	0.30588	-5.88361	4.01408e-09	5.33182e-08	chr17:74424851-74451653	+	103.416	75.5308	77.154	22.5039	27.939	23.031
ENSG00000128482.16	RNF112	37.5753	-2.22286	0.378292	-5.87604	4.20199e-09	5.57471e-08	chr17:19411125-19417276	+	52.7218	73.4032	59.5746	10.7627	13.9695	15.0202
ENSG00000248690.8	HAS2-AS1	39.5277	-2.11256	0.36011	-5.86643	4.45274e-09	5.8932e-08	chr8:121639293-121994185	+	66.9161	69.148	56.6447	14.6764	16.7634	13.0175
ENSG00000151117.9	TMEM86A	157.16	1.09049	0.186038	5.86164	4.58317e-09	6.05493e-08	chr11:18693122-18704785	+	115.582	97.871	87.897	186.88	211.405	243.327
ENSG00000162804.14	SNED1	83.3889	-1.44275	0.246155	-5.86116	4.59651e-09	6.06894e-08	chr2:240998618-241095568	+	145.999	108.509	111.336	42.0724	49.359	43.0579
ENSG00000107796.13	ACTA2	48.0153	-2.03754	0.34802	-5.85466	4.77996e-09	6.29609e-08	chr10:88935074-88991339	-	69.9577	89.3604	72.2709	28.3744	12.1069	16.0215
ENSG00000196159.14	FAT4	37.0505	2.29048	0.392246	5.83939	5.23932e-09	6.87245e-08	chr4:125314918-125492932	+	12.1666	14.8934	10.743	78.2743	52.1529	54.0727
ENSG00000198910.14	L1CAM	90.7907	-1.41091	0.241666	-5.83825	5.27505e-09	6.91521e-08	chrX:153861514-153886173	-	142.957	114.892	137.705	51.8567	37.252	60.0808
ENSG00000057294.16	PKP2	74.7185	-1.50991	0.259555	-5.81729	5.98079e-09	7.77116e-08	chr12:32790755-32896777	-	100.374	118.083	113.289	48.9214	32.5955	35.0471
ENSG00000183496.6	MEX3B	117.688	-1.17581	0.202569	-5.80447	6.45698e-09	8.36036e-08	chr15:82041778-82046119	-	163.235	178.721	147.472	72.4037	65.1911	79.1063
ENSG00000189058.9	APOD	26.0034	2.8238	0.487286	5.79494	6.83446e-09	8.82841e-08	chr3:195568705-195584033	-	8.11104	5.31907	5.8598	52.8352	42.8399	41.0552
ENSG00000162849.16	KIF26B	246.345	-1.02536	0.176999	-5.79304	6.91227e-09	8.92371e-08	chr1:245154985-245709432	+	314.303	404.25	272.481	163.398	130.382	193.26
ENSG00000179270.7	PCARE	46.6316	-1.99982	0.345285	-5.7918	6.96365e-09	8.97954e-08	chr2:29060976-29074523	-	68.9439	80.8499	74.2241	11.7411	27.0077	17.0229
ENSG00000231890.8	DARS1-AS1	106.54	1.21898	0.210537	5.78989	7.04341e-09	9.07707e-08	chr2:135985176-136022593	+	69.9577	60.6374	61.5279	150.678	159.253	137.184
ENSG00000250305.9	TRMT9B	113.458	1.32614	0.229133	5.78764	7.13833e-09	9.18867e-08	chr8:12945642-13031503	+	67.93	63.8289	62.5045	155.57	206.749	124.167
ENSG00000133816.18	MICAL2	132.355	-1.1555	0.199667	-5.78711	7.16082e-09	9.21226e-08	chr11:12094008-12359144	+	163.235	201.061	183.607	76.3175	70.7789	99.1333
ENSG00000248445.5	SEMA6A-AS1	25.9555	2.82303	0.488073	5.78403	7.29306e-09	9.37146e-08	chr5:116447547-116508276	+	9.12492	4.25526	5.8598	45.0077	48.4277	43.0579
ENSG00000285748.2	RP11-674P19.3	38.4761	2.21562	0.383649	5.77514	7.68908e-09	9.85738e-08	chr18:69240448-69250781	-	13.1804	18.0848	9.76633	58.7057	54.0155	77.1036
ENSG00000213023.11	SYT3	72.0304	1.5139	0.262639	5.76421	8.20434e-09	1.04875e-07	chr19:50621307-50639881	-	37.5136	42.5526	32.2289	104.692	121.069	94.1265
ENSG00000089127.15	OAS1	116.889	1.23864	0.215406	5.75026	8.91077e-09	1.13315e-07	chr12:112905856-112933219	+	59.8189	76.5947	72.2709	165.354	135.039	192.258
ENSG00000148604.15	RGR	14.3499	-7.33076	1.27606	-5.74486	9.1998e-09	1.16654e-07	chr10:84230666-84259960	+	29.4025	24.4677	32.2289	0	0	0
ENSG00000179111.9	HES7	42.83	1.98223	0.345304	5.74054	9.43772e-09	1.19602e-07	chr17:8120592-8124106	-	14.1943	19.1487	18.556	70.4469	60.5346	74.0996
ENSG00000259602.1	RP11-138E16.1	19.6933	3.7606	0.655849	5.73394	9.81265e-09	1.24069e-07	chr15:48938236-48948031	+	3.04164	2.12763	2.9299	37.1803	42.8399	30.0404
ENSG00000234323.8	LINC01505	28.5654	-2.80033	0.488461	-5.73296	9.86923e-09	1.24713e-07	chr9:105993310-106740875	+	45.6246	54.2545	49.8083	4.89214	2.7939	14.0188
ENSG00000164181.14	ELOVL7	61.8566	-1.67292	0.291972	-5.72973	1.0059e-08	1.27038e-07	chr5:60751791-60844274	-	83.1382	107.445	91.8035	26.4176	23.2825	39.0525
ENSG00000287706.1	RP11-788A4.3	25.035	7.09021	1.24005	5.71767	1.07993e-08	1.36076e-07	chr3:152650519-152679450	+	0	1.06381	0	59.6842	35.3894	54.0727
ENSG00000171557.17	FGG	14.3378	7.26018	1.27511	5.69375	1.24281e-08	1.558e-07	chr4:154604134-154612967	-	0	0	0	27.396	32.5955	26.035
ENSG00000286332.1	RP11-159H20.6	21.8947	-3.23775	0.568737	-5.69288	1.24915e-08	1.56506e-07	chr9:76915615-76919785	-	39.5413	49.9993	29.299	2.93529	5.58781	4.00538
ENSG00000137809.17	ITGA11	73.5755	-1.55539	0.273321	-5.69069	1.26526e-08	1.58255e-07	chr15:68296532-68432163	-	98.3464	123.403	107.43	33.2666	27.939	51.0686
ENSG00000142583.18	SLC2A5	18.5581	-4.46185	0.785707	-5.67878	1.35662e-08	1.69201e-07	chr1:9035106-9088478	-	32.4442	46.8078	27.3457	1.95686	2.7939	0
ENSG00000121005.9	CRISPLD1	19.8155	-3.661	0.646011	-5.66708	1.45247e-08	1.80749e-07	chr8:74984505-75034558	+	44.6107	25.5316	40.042	0.978429	3.7252	4.00538
ENSG00000091513.16	TF	62.0159	-1.62584	0.28694	-5.66612	1.4607e-08	1.81567e-07	chr3:133746040-133796641	+	114.568	76.5947	89.8503	31.3097	30.7329	29.039
ENSG00000236039.3	LINC02889	44.8883	-1.89289	0.335509	-5.64183	1.6825e-08	2.07501e-07	chr7:17405479-17558909	-	68.9439	80.8499	62.5045	15.6549	22.3512	19.0256
ENSG00000125675.20	GRIA3	19.2432	4.15128	0.736384	5.63738	1.72655e-08	2.12698e-07	chrX:123184153-123490915	+	2.02776	4.25526	0	31.3097	29.8016	48.0646
ENSG00000177873.14	ZNF619	25.5652	-2.70791	0.480671	-5.63361	1.76478e-08	2.17285e-07	chr3:40477113-40491053	+	45.6246	41.4888	45.9018	3.91372	7.45041	9.01211
ENSG00000227502.3	MROCKI	62.1067	1.70277	0.302307	5.63258	1.77537e-08	2.18467e-07	chr6:113868013-113873351	-	18.2498	37.2335	32.2289	85.1233	112.687	87.1171
ENSG00000113356.13	POLR3G	100.895	1.31448	0.233429	5.63117	1.7899e-08	2.20011e-07	chr5:90471748-90514557	+	70.9716	46.8078	55.6681	171.225	128.52	132.178
ENSG00000105516.11	DBP	209.412	-1.00894	0.179351	-5.62554	1.84929e-08	2.26931e-07	chr19:48630030-48637379	-	347.761	228.72	262.714	122.304	138.764	156.21
ENSG00000248522.1	SBF1P1	23.0035	-3.20141	0.569652	-5.61995	1.91015e-08	2.34009e-07	chr8:55449509-55455139	-	40.5552	47.8717	36.1354	0	7.45041	6.00808
ENSG00000154027.19	AK5	26.0077	-2.74297	0.488706	-5.61272	1.99173e-08	2.43598e-07	chr1:77282019-77559966	+	56.7773	35.1059	43.9485	7.82743	8.38171	4.00538
ENSG00000132639.13	SNAP25	71.8511	1.47996	0.264205	5.60157	2.12423e-08	2.59085e-07	chr20:10218830-10307418	+	47.6524	30.8506	35.1588	100.778	101.512	115.155
ENSG00000204869.8	IGFL4	226.015	1.06839	0.190792	5.59974	2.14673e-08	2.61685e-07	chr19:46039748-46077118	-	97.3325	146.806	193.373	318.968	282.184	317.427
ENSG00000118523.6	CCN2	2962.15	-1.43497	0.256322	-5.5983	2.16465e-08	2.63579e-07	chr6:131948176-131951372	-	3440.1	5856.3	3678	1581.14	1584.14	1633.2
ENSG00000214595.12	EML6	128.878	1.14323	0.204271	5.59661	2.18579e-08	2.65859e-07	chr2:54723499-54972025	+	90.2354	73.4032	77.154	179.052	147.146	206.277
ENSG00000233058.2	LINC00884	60.4118	1.64645	0.29459	5.58896	2.28439e-08	2.77394e-07	chr3:194487140-194521156	+	37.5136	30.8506	19.5327	94.9076	87.5423	92.1238
ENSG00000139800.8	ZIC5	39.2576	-2.05185	0.368807	-5.56348	2.64443e-08	3.19532e-07	chr13:99962964-99971909	-	70.9716	65.9565	52.7382	14.6764	11.1756	20.0269
ENSG00000124785.9	NRN1	1202.25	1.40152	0.252218	5.55677	2.74812e-08	3.31516e-07	chr6:5997999-6007605	-	871.937	478.717	629.929	1754.32	1825.35	1653.22
ENSG00000135925.9	WNT10A	42.263	1.88901	0.340032	5.55538	2.77006e-08	3.3382e-07	chr2:218880852-218899581	+	16.2221	19.1487	18.556	64.5763	67.985	67.0902
ENSG00000260941.1	LINC00622	18.5423	3.667	0.66514	5.51313	3.52517e-08	4.21113e-07	chr1:119597702-119599271	-	2.02776	2.12763	3.90653	33.2666	28.8703	41.0552
ENSG00000179023.9	KLHDC7A	17.9829	-5.17299	0.938817	-5.51011	3.58602e-08	4.27919e-07	chr1:18480930-18485974	+	29.4025	40.425	35.1588	0.978429	0.931301	1.00135
ENSG00000170745.12	KCNS3	69.2381	1.4717	0.267489	5.50188	3.75759e-08	4.47425e-07	chr2:17877847-18361616	+	32.4442	42.5526	35.1588	112.519	86.611	106.143
ENSG00000236740.6	RP11-411K7.1	39.3888	-1.98763	0.362435	-5.48411	4.1555e-08	4.92679e-07	chr6:53930022-53997667	+	57.7912	72.3394	58.598	20.547	13.0382	14.0188
ENSG00000103355.14	PRSS33	36.2258	-2.03471	0.371326	-5.47957	4.26367e-08	5.0442e-07	chr16:2783953-2787948	-	52.7218	58.5098	63.4812	15.6549	13.9695	13.0175
ENSG00000261616.1	RP11-6O2.3	105.046	-1.19984	0.2192	-5.47369	4.4075e-08	5.21156e-07	chr15:99139317-99145370	+	154.11	126.594	158.215	54.792	61.4659	75.101
ENSG00000229334.1	AC046143.3	58.7431	1.67426	0.306591	5.46089	4.73741e-08	5.58371e-07	chr3:194632923-194645401	+	35.4858	18.0848	30.2756	89.037	75.4354	104.14
ENSG00000168913.7	ENHO	79.0712	-1.32246	0.242191	-5.46042	4.75022e-08	5.59284e-07	chr9:34521043-34522990	-	109.499	106.381	123.056	42.0724	49.359	44.0592
ENSG00000138111.14	MFSD13A	125.414	1.07321	0.196623	5.45822	4.80919e-08	5.65624e-07	chr10:102461395-102477045	+	77.0549	90.4242	75.2008	160.462	188.123	161.217
ENSG00000128510.12	CPA4	41.272	-1.96546	0.36065	-5.44977	5.04357e-08	5.91929e-07	chr7:130293134-130324180	+	77.0549	58.5098	61.5279	23.4823	13.0382	14.0188
ENSG00000277630.4	ENSG00000277630	12.2537	7.03338	1.29081	5.44883	5.07027e-08	5.9443e-07	GL000213.1:108007-139659	-	0	0	0	26.4176	26.0764	21.0283
ENSG00000226124.8	FTCDNL1	25.0702	2.77382	0.509155	5.44788	5.09723e-08	5.97274e-07	chr2:199760544-199851192	-	5.0694	3.19144	10.743	41.094	37.252	53.0713
ENSG00000069535.14	MAOB	73.7036	-1.53515	0.282065	-5.44253	5.253e-08	6.13573e-07	chrX:43766610-43882450	-	118.624	109.573	100.593	21.5254	42.8399	49.066
ENSG00000142698.15	C1orf94	48.891	1.75235	0.322315	5.43674	5.42633e-08	6.3248e-07	chr1:34166883-34219131	+	18.2498	25.5316	23.4392	65.5547	88.4736	72.0969
ENSG00000174136.13	RGMB	82.1506	1.32156	0.24308	5.43676	5.42595e-08	6.3248e-07	chr5:98768650-98798643	+	46.6385	56.3822	38.0887	113.498	120.138	118.159
ENSG00000143882.12	ATP6V1C2	61.8035	-1.51742	0.279647	-5.42619	5.75698e-08	6.68901e-07	chr2:10721100-10785110	+	84.1521	85.1052	105.476	28.3744	31.6642	36.0485
ENSG00000229676.3	ZNF492	19.2382	-6.77942	1.25197	-5.415	6.12874e-08	7.10599e-07	chr19:22634324-22667671	+	39.5413	31.9144	42.9719	0	0	1.00135
ENSG00000257588.1	RP11-469H8.6	16.4898	-4.27899	0.792424	-5.39987	6.66884e-08	7.71196e-07	chr12:49951512-49962924	-	35.4858	36.1697	22.4626	1.95686	1.8626	1.00135
ENSG00000198857.3	HSD3BP5	28.5485	2.67794	0.49624	5.39645	6.79706e-08	7.852e-07	chr1:119601340-119609250	+	3.04164	4.25526	15.6261	42.0724	51.2216	55.074
ENSG00000132702.13	HAPLN2	29.3005	2.54964	0.472527	5.39575	6.82379e-08	7.87876e-07	chr1:156619331-156625725	+	11.1527	12.7658	1.95327	51.8567	54.0155	44.0592
ENSG00000261220.2	ST3GAL1-DT	46.4629	-1.81193	0.335901	-5.39424	6.88126e-08	7.93267e-07	chr8:133573183-133573861	+	58.8051	72.3394	85.9437	18.5901	26.0764	17.0229
ENSG00000231290.6	APCDD1L-DT	47.7139	1.81905	0.337486	5.38998	7.04637e-08	8.10608e-07	chr20:58515379-58619888	+	16.2221	26.5954	20.5093	56.7489	80.0919	86.1158
ENSG00000117114.20	ADGRL2	11.4937	-7.01019	1.30253	-5.38197	7.36745e-08	8.45781e-07	chr1:81306147-81992436	+	17.236	23.4039	28.3224	0	0	0
ENSG00000184221.13	OLIG1	23.4478	2.84296	0.529694	5.36717	7.99801e-08	9.11064e-07	chr21:33070141-33072413	+	6.08328	3.19144	7.81307	53.8136	30.7329	39.0525
ENSG00000230615.7	RP5-1198O20.4	94.4541	1.17728	0.219669	5.35934	8.35251e-08	9.49974e-07	chr1:44030437-44115913	+	57.7912	55.3184	60.5513	129.153	125.726	138.186
ENSG00000177614.11	PGBD5	119.968	-1.12338	0.209723	-5.3565	8.48472e-08	9.64515e-07	chr1:230314490-230426332	-	148.027	197.87	147.472	81.2096	66.1224	79.1063
ENSG00000183091.20	NEB	91.3054	1.22621	0.229502	5.34291	9.14677e-08	1.03445e-06	chr2:151485336-151734487	-	54.7495	60.6374	48.8317	141.872	127.588	114.153
ENSG00000102383.14	ZDHHC15	21.299	-2.9612	0.554648	-5.33888	9.35228e-08	1.05661e-06	chrX:75368427-75523502	-	28.3887	34.0421	50.7849	3.91372	4.65651	6.00808
ENSG00000198824.7	CHAMP1	75.12	-1.3446	0.252209	-5.3313	9.75126e-08	1.09831e-06	chr13:114314482-114337626	+	103.416	121.275	98.64	42.0724	37.252	48.0646
ENSG00000176658.17	MYO1D	104.77	-1.12766	0.211561	-5.33019	9.81093e-08	1.1039e-06	chr17:32492522-32877177	-	140.929	135.104	155.285	67.5116	71.7102	58.0781
ENSG00000240225.10	ZNF542P	121.14	-1.12865	0.212115	-5.32093	1.03238e-07	1.15748e-06	chr19:56368099-56379828	+	170.332	156.381	171.887	98.8213	63.3285	66.0888
ENSG00000148948.8	LRRC4C	16.9901	5.01526	0.942779	5.31965	1.03966e-07	1.16505e-06	chr11:40114203-41459773	-	0	2.12763	0.976633	33.2666	33.5268	32.0431
ENSG00000006453.14	BAIAP2L1	51.3609	-1.76195	0.331395	-5.31676	1.05632e-07	1.18132e-06	chr7:98291650-98401090	-	95.3048	70.2118	72.2709	19.5686	16.7634	34.0458
ENSG00000135245.10	HILPDA	1205.89	-1.74961	0.329501	-5.30987	1.09701e-07	1.22435e-06	chr7:128455849-128458418	+	2589.45	1142.54	1844.86	581.187	574.613	502.676
ENSG00000118292.9	C1orf54	87.8097	1.23993	0.23358	5.30838	1.10601e-07	1.23334e-06	chr1:150268200-150280916	+	50.694	55.3184	50.7849	139.915	122	108.145
ENSG00000148482.12	SLC39A12	17.8234	-6.66686	1.25592	-5.30836	1.10619e-07	1.23334e-06	chr10:17951839-18043292	+	36.4997	37.2335	32.2289	0.978429	0	0
ENSG00000167434.10	CA4	24.8007	-2.89916	0.546591	-5.30407	1.13251e-07	1.26015e-06	chr17:60149942-60170899	+	49.6801	52.1269	29.299	1.95686	3.7252	12.0162
ENSG00000120820.13	GLT8D2	69.0704	1.36719	0.258051	5.29814	1.16989e-07	1.30042e-06	chr12:103988987-104064183	-	37.5136	36.1697	41.9952	95.886	98.7179	104.14
ENSG00000183098.11	GPC6	17.2189	5.04065	0.951854	5.29561	1.18622e-07	1.31725e-06	chr13:93226807-94408020	+	2.02776	0	0.976633	43.0509	24.2138	33.0444
ENSG00000053524.13	MCF2L2	88.8579	1.26158	0.238346	5.29307	1.20283e-07	1.33435e-06	chr3:183178041-183428778	-	56.7773	39.3611	60.5513	127.196	134.107	115.155
ENSG00000182103.5	FAM181B	35.032	2.15414	0.407429	5.28714	1.24243e-07	1.37621e-06	chr11:82729940-82733864	-	12.1666	10.6381	15.6261	68.49	38.1833	65.0875
ENSG00000162407.9	PLPP3	81.2571	-1.48844	0.281623	-5.28522	1.25554e-07	1.38934e-06	chr1:56494761-56645301	-	148.027	74.467	136.729	42.0724	38.1833	48.0646
ENSG00000108001.16	EBF3	10.5564	-6.88556	1.30961	-5.25771	1.45864e-07	1.59885e-06	chr10:129835233-129973053	-	21.2915	24.4677	17.5794	0	0	0
ENSG00000110436.13	SLC1A2	82.1965	-1.52829	0.290929	-5.25315	1.49523e-07	1.63591e-06	chr11:35251205-35420063	-	104.43	140.424	121.103	30.3313	29.8016	67.0902
ENSG00000242574.9	HLA-DMB	23.5953	2.57312	0.490148	5.24968	1.52365e-07	1.66186e-06	chr6:32934629-32941028	-	7.09716	7.4467	5.8598	36.2019	41.9086	43.0579
ENSG00000229400.1	CNIH3-AS1	35.2332	2.34577	0.446942	5.2485	1.53345e-07	1.67007e-06	chr1:224717504-224730662	-	13.1804	14.8934	6.83643	31.3097	80.0919	65.0875
ENSG00000178662.16	CSRNP3	16.0051	4.16719	0.793993	5.2484	1.53426e-07	1.67014e-06	chr2:165469647-165689407	+	3.04164	0	1.95327	33.2666	30.7329	27.0363
ENSG00000282164.3	PEG13	34.8982	2.14666	0.41184	5.21237	1.8644e-07	2.00872e-06	chr8:140094894-140100543	-	5.0694	14.8934	18.556	61.641	52.1529	57.0767
ENSG00000226149.6	RP1-69D17.4	48.8694	-1.64583	0.316689	-5.19699	2.02546e-07	2.17376e-06	chr6:129439485-129576047	-	75.0271	78.7223	68.3643	28.3744	17.6947	25.0337
ENSG00000279864.2	NCOR1P4	10.6786	6.83405	1.32097	5.17351	2.29737e-07	2.45008e-06	chr21:9529934-9559268	+	0	0	0	32.2882	16.7634	15.0202
ENSG00000164318.18	EGFLAM	16.8767	6.51778	1.26258	5.16227	2.43979e-07	2.58201e-06	chr5:38258409-38465480	+	0	0	0.976633	38.1587	26.0764	36.0485
ENSG00000066248.15	NGEF	31.9215	-2.12577	0.413661	-5.13891	2.76336e-07	2.90356e-06	chr2:232878701-233013256	-	61.8467	39.3611	54.6915	9.78429	15.8321	10.0135
ENSG00000136250.12	AOAH	16.2919	-6.53613	1.27194	-5.13872	2.7662e-07	2.90517e-06	chr7:36512941-36724549	-	44.6107	28.723	23.4392	0.978429	0	0
ENSG00000158473.8	CD1D	20.1961	-3.09375	0.60317	-5.12915	2.91058e-07	3.05534e-06	chr1:158178030-158186427	+	30.4164	32.9783	44.9251	6.849	0	6.00808
ENSG00000141622.14	RNF165	16.5528	6.49093	1.26769	5.12027	3.05092e-07	3.19659e-06	chr18:46326809-46463140	+	0	1.06381	0	34.245	40.9773	23.031
ENSG00000198624.13	CCDC69	113.046	1.07917	0.21088	5.11745	3.09688e-07	3.2432e-06	chr5:151181052-151224093	-	63.8745	65.9565	87.897	148.721	167.634	144.194
ENSG00000149573.9	MPZL2	34.8	1.9579	0.38307	5.11107	3.20344e-07	3.34844e-06	chr11:118253416-118264536	-	16.2221	13.8296	12.6962	65.5547	48.4277	52.07
ENSG00000043355.12	ZIC2	31.6136	-2.05547	0.402557	-5.10605	3.28966e-07	3.42883e-06	chr13:99981784-99986765	+	43.5969	59.5736	49.8083	12.7196	13.9695	10.0135
ENSG00000261115.6	TMEM178B	62.0148	1.52222	0.299169	5.08815	3.61582e-07	3.75337e-06	chr7:141074064-141480380	+	34.4719	38.2973	23.4392	92.9507	70.7789	112.151
ENSG00000135116.9	HRK	59.1502	-1.44675	0.284402	-5.08699	3.63782e-07	3.7739e-06	chr12:116856144-116881441	-	75.0271	94.6795	89.8503	32.2882	27.0077	36.0485
ENSG00000048740.18	CELF2	15.1312	-4.91482	0.966428	-5.08556	3.66544e-07	3.79898e-06	chr10:10798397-11336675	+	23.3192	24.4677	40.042	1.95686	0	1.00135
ENSG00000111319.13	SCNN1A	15.3418	-6.45086	1.26961	-5.08099	3.75473e-07	3.88787e-06	chr12:6346843-6377730	-	28.3887	26.5954	36.1354	0	0.931301	0
ENSG00000163864.17	NMNAT3	116.551	-1.12461	0.221554	-5.07603	3.85405e-07	3.98697e-06	chr3:139560180-139678017	-	154.11	191.487	133.799	63.5979	65.1911	91.1225
ENSG00000228159.2	LINC01674	15.5094	4.88663	0.963029	5.07423	3.89062e-07	4.02104e-06	chr21:13516107-13574999	+	2.02776	0	0.976633	20.547	34.4581	35.0471
ENSG00000137752.24	CASP1	17.4091	-3.2831	0.647544	-5.07008	3.97651e-07	4.10404e-06	chr11:105025443-105035250	-	33.4581	31.9144	29.299	6.849	0.931301	2.00269
ENSG00000100311.17	PDGFB	14.4916	-4.4228	0.875655	-5.05085	4.39858e-07	4.51433e-06	chr22:39223359-39244982	-	22.3054	26.5954	34.1822	2.93529	0.931301	0
ENSG00000173166.18	RAPH1	117.289	-1.00096	0.198358	-5.04622	4.50635e-07	4.6142e-06	chr2:203394345-203535335	-	147.013	154.253	167.981	71.4253	81.9545	81.109
ENSG00000232692.1	AP001596.6	26.4054	-2.41264	0.478675	-5.04024	4.64947e-07	4.74315e-06	chr21:26378552-26471698	+	38.5275	38.2973	56.6447	3.91372	13.0382	8.01077
ENSG00000157152.17	SYN2	48.4449	1.60165	0.318345	5.03117	4.87505e-07	4.9618e-06	chr3:12004388-12192032	+	24.3331	20.2125	27.3457	81.2096	61.4659	76.1023
ENSG00000123453.18	SARDH	27.9461	-2.26135	0.450085	-5.02426	5.05383e-07	5.13667e-06	chr9:133663560-133739955	-	46.6385	53.1907	39.0653	5.87057	14.9008	8.01077
ENSG00000237978.6	KCNMB2-AS1	18.6493	3.31826	0.660575	5.02329	5.07931e-07	5.16019e-06	chr3:178526505-178937352	-	8.11104	2.12763	0	41.094	33.5268	27.0363
ENSG00000196090.12	PTPRT	9.19007	-6.6857	1.33239	-5.01781	5.22634e-07	5.29737e-06	chr20:42072752-43189970	-	13.1804	23.4039	18.556	0	0	0
ENSG00000288658.1	RP11-384O8.2	17.1323	-3.11865	0.622213	-5.01219	5.38134e-07	5.44698e-06	chr2:222317242-222320208	-	32.4442	26.5954	33.2055	1.95686	5.58781	3.00404
ENSG00000134215.16	VAV3	9.00854	-6.65725	1.32918	-5.00853	5.48473e-07	5.53892e-06	chr1:107571161-107965180	-	17.236	20.2125	16.6028	0	0	0
ENSG00000136514.3	RTP4	35.1839	1.89389	0.379709	4.98774	6.10891e-07	6.13839e-06	chr3:187368385-187372076	+	12.1666	15.9572	16.6028	60.6626	45.6338	60.0808
ENSG00000272788.1	RP11-674N23.4	31.0573	-2.0172	0.404771	-4.98355	6.24266e-07	6.26423e-06	chr18:8801656-8802305	+	55.7634	45.744	47.855	9.78429	11.1756	16.0215
ENSG00000176907.5	TCIM	89.585	1.28461	0.25783	4.98239	6.2804e-07	6.29923e-06	chr8:40153482-40155310	+	53.7357	46.8078	55.6681	155.57	87.5423	138.186
ENSG00000087250.9	MT3	34.4093	-2.11985	0.425754	-4.97904	6.39015e-07	6.39768e-06	chr16:56589074-56591088	+	81.1104	34.0421	52.7382	12.7196	15.8321	10.0135
ENSG00000154548.9	SRSF12	67.0218	-1.34547	0.270233	-4.97891	6.39446e-07	6.3991e-06	chr6:89095959-89118071	-	90.2354	108.509	89.8503	46.9646	33.5268	33.0444
ENSG00000165171.11	METTL27	143.881	-1.00661	0.202893	-4.96131	7.00196e-07	6.97161e-06	chr7:73834590-73842516	-	239.276	169.147	167.981	80.2312	101.512	105.141
ENSG00000113504.21	SLC12A7	52.1571	-1.48312	0.300066	-4.94265	7.70671e-07	7.61564e-06	chr5:1050384-1112063	-	66.9161	76.5947	86.9204	27.396	26.0764	29.039
ENSG00000237716.2	RP3-400B16.3	19.7759	3.14266	0.636281	4.93911	7.84801e-07	7.73449e-06	chr6:4185479-4188950	-	1.01388	2.12763	8.7897	24.4607	51.2216	31.0417
ENSG00000258998.2	LINC02302	8.92264	-6.64116	1.34726	-4.92938	8.24894e-07	8.10791e-06	chr14:44763153-44782829	-	13.1804	27.6592	12.6962	0	0	0
ENSG00000243232.6	PCDHAC2	55.1767	-1.60588	0.326999	-4.91095	9.0636e-07	8.85738e-06	chr5:140966470-141012347	+	91.2492	64.8927	92.7802	21.5254	19.5573	41.0552
ENSG00000187268.12	FAM9C	13.918	-4.78524	0.975219	-4.90684	9.25558e-07	9.03698e-06	chrX:13035617-13044682	-	18.2498	32.9783	29.299	0.978429	0	2.00269
ENSG00000162490.7	DRAXIN	13.9795	-4.79781	0.978101	-4.90522	9.33204e-07	9.09956e-06	chr1:11691710-11725857	+	31.4303	20.2125	29.299	2.93529	0	0
ENSG00000273820.2	USP27X	47.8213	-1.60345	0.327522	-4.89571	9.7953e-07	9.51765e-06	chrX:49879484-49882558	+	74.0133	86.169	55.6681	23.4823	19.5573	28.0377
ENSG00000183682.8	BMP8A	37.0617	1.79286	0.367357	4.88042	1.05858e-06	1.02451e-05	chr1:39491636-39529869	+	19.2637	14.8934	15.6261	46.9646	60.5346	65.0875
ENSG00000111674.9	ENO2	2371.37	-1.01665	0.20879	-4.86924	1.12029e-06	1.0814e-05	chr12:6913745-6923698	+	3847.68	2418.05	3256.1	1373.71	1701.49	1631.19
ENSG00000286818.1	CTC-431G16.4	8.54659	6.51352	1.33792	4.86839	1.12513e-06	1.08559e-05	chr5:79840797-79845239	+	0	0	0	13.698	19.5573	18.0242
ENSG00000102755.12	FLT1	14.9919	4.04876	0.833447	4.85785	1.1867e-06	1.14151e-05	chr13:28300346-28495145	-	2.02776	3.19144	0	45.0077	17.6947	22.0296
ENSG00000106236.4	NPTX2	44.849	-1.68255	0.348373	-4.82973	1.36721e-06	1.30435e-05	chr7:98617285-98629869	+	94.2909	54.2545	56.6447	21.5254	22.3512	20.0269
ENSG00000100968.14	NFATC4	80.271	-1.18762	0.245907	-4.82954	1.36847e-06	1.30498e-05	chr14:24365673-24379604	+	122.68	110.637	101.57	50.8783	56.8094	39.0525
ENSG00000013588.9	GPRC5A	60.2869	-1.51712	0.314525	-4.82353	1.41043e-06	1.34325e-05	chr12:12891559-12917937	+	113.555	62.7651	91.8035	37.1803	35.3894	21.0283
ENSG00000171903.17	CYP4F11	51.5578	1.73789	0.360915	4.81523	1.47033e-06	1.39729e-05	chr19:15912367-15934867	-	21.2915	10.6381	39.0653	65.5547	85.6797	87.1171
ENSG00000162591.16	MEGF6	65.3514	-1.46652	0.304915	-4.80961	1.51228e-06	1.43345e-05	chr1:3487951-3611508	-	129.777	72.3394	85.9437	28.3744	45.6338	30.0404
ENSG00000188613.7	NANOS1	61.2017	-1.35812	0.28252	-4.80716	1.5309e-06	1.45048e-05	chr10:119029714-119033730	+	97.3325	92.5519	74.2241	40.1156	27.939	35.0471
ENSG00000140538.16	NTRK3	81.5233	1.19307	0.248362	4.80376	1.55714e-06	1.47407e-05	chr15:87859751-88256768	-	55.7634	53.1907	40.042	94.9076	121.069	124.167
ENSG00000154493.20	C10orf90	17.4379	-2.86649	0.597039	-4.80117	1.57738e-06	1.49195e-05	chr10:126424997-126798708	-	29.4025	24.4677	38.0887	2.93529	3.7252	6.00808
ENSG00000105642.16	KCNN1	31.2974	2.03753	0.424755	4.79695	1.61103e-06	1.52313e-05	chr19:17951293-18000085	+	17.236	13.8296	5.8598	43.0509	57.7407	50.0673
ENSG00000002587.10	HS3ST1	26.6923	-2.16826	0.45271	-4.78951	1.67185e-06	1.57726e-05	chr4:11393150-11429564	-	49.6801	51.0631	30.2756	11.7411	8.38171	9.01211
ENSG00000188211.9	NCR3LG1	91.7418	1.16657	0.243599	4.78889	1.67707e-06	1.5815e-05	chr11:17351800-17377341	+	48.6663	55.3184	65.4344	134.045	97.7866	149.201
ENSG00000278626.1	RP11-467L19.16	41.4626	1.90494	0.398145	4.78455	1.71373e-06	1.614e-05	chr15:20642799-20643448	-	9.12492	12.7658	30.2756	77.2959	51.2216	68.0915
ENSG00000163331.12	DAPL1	36.4267	-1.9941	0.416933	-4.78279	1.72883e-06	1.62753e-05	chr2:158795317-158862781	+	34.4719	64.8927	75.2008	18.5901	8.38171	17.0229
ENSG00000113361.13	CDH6	13.0466	-4.6927	0.981602	-4.78065	1.74725e-06	1.64348e-05	chr5:31193686-31329146	+	24.3331	26.5954	24.4158	2.93529	0	0
ENSG00000171873.8	ADRA1D	22.4102	-2.4099	0.504745	-4.77449	1.80164e-06	1.69247e-05	chr20:4220630-4249287	-	45.6246	38.2973	29.299	9.78429	7.45041	4.00538
ENSG00000181790.11	ADGRB1	19.9589	2.7736	0.581128	4.77278	1.81698e-06	1.70615e-05	chr8:142449430-142545009	+	4.05552	6.38289	4.88317	50.8783	33.5268	20.0269
ENSG00000122420.10	PTGFR	14.32	3.46663	0.72747	4.76532	1.88553e-06	1.76602e-05	chr1:78303884-78540701	+	1.01388	3.19144	2.9299	24.4607	23.2825	31.0417
ENSG00000186918.14	ZNF395	751.82	-1.2546	0.263372	-4.7636	1.90171e-06	1.78042e-05	chr8:28345590-28402701	-	1400.17	751.053	1027.42	482.365	442.368	407.548
ENSG00000143603.19	KCNN3	114.675	1.07382	0.226111	4.74907	2.04359e-06	1.90516e-05	chr1:154697455-154870281	-	59.8189	63.8289	97.6633	132.088	170.428	164.221
ENSG00000109063.15	MYH3	88.6867	1.19396	0.251441	4.74849	2.04945e-06	1.90901e-05	chr17:10628526-10657309	-	64.8883	36.1697	60.5513	106.649	139.695	124.167
ENSG00000246228.6	CASC8	26.2642	-2.32156	0.488901	-4.74853	2.04905e-06	1.90901e-05	chr8:127289817-127482139	-	64.8883	35.1059	31.2523	5.87057	7.45041	13.0175
ENSG00000157368.11	IL34	16.1383	-3.18452	0.672832	-4.73301	2.21217e-06	2.05193e-05	chr16:70579895-70660682	+	23.3192	30.8506	33.2055	2.93529	6.51911	0
ENSG00000135744.9	AGT	66.4192	-1.26329	0.267613	-4.7206	2.35148e-06	2.17384e-05	chr1:230690776-230745576	-	105.444	97.871	78.1307	37.1803	42.8399	37.0498
ENSG00000179862.7	CITED4	44.5844	-1.53406	0.325079	-4.71905	2.36952e-06	2.18868e-05	chr1:40861054-40862363	-	65.9022	61.7013	71.2942	25.4392	25.1451	18.0242
ENSG00000244731.8	C4A	86.9756	-1.22258	0.260346	-4.696	2.65308e-06	2.43228e-05	chr6:31982057-32002681	+	156.138	111.701	97.6633	41.094	65.1911	50.0673
ENSG00000230937.12	MIR205HG	14.5141	-3.16749	0.675544	-4.6888	2.7481e-06	2.51418e-05	chr1:209428817-209432838	+	22.3054	28.723	27.3457	3.91372	2.7939	2.00269
ENSG00000108370.17	RGS9	66.5452	-1.23526	0.263579	-4.68647	2.77953e-06	2.54188e-05	chr17:65100812-65227703	+	88.2076	91.4881	100.593	44.0293	41.9086	33.0444
ENSG00000062096.15	ARSF	43.3549	-1.6741	0.35735	-4.68478	2.80261e-06	2.55874e-05	chrX:3041471-3112727	+	88.2076	65.9565	43.9485	19.5686	21.4199	21.0283
ENSG00000273002.1	ARHGEF2-AS2	29.6574	1.99361	0.425711	4.683	2.82702e-06	2.57889e-05	chr1:155978799-155982986	+	7.09716	17.021	11.7196	49.8999	52.1529	40.0538
ENSG00000141505.12	ASGR1	31.3253	1.85487	0.396361	4.67974	2.87246e-06	2.61602e-05	chr17:7173431-7179564	-	10.1388	15.9572	14.6495	48.9214	51.2216	47.0633
ENSG00000139973.17	SYT16	27.5957	-2.16044	0.462015	-4.67613	2.9234e-06	2.65803e-05	chr14:61811974-62112550	+	36.4997	47.8717	50.7849	14.6764	3.7252	12.0162
ENSG00000076864.20	RAP1GAP	41.6227	-1.66479	0.357125	-4.66165	3.13677e-06	2.83452e-05	chr1:21596215-21669363	-	83.1382	52.1269	54.6915	17.6117	25.1451	17.0229
ENSG00000003137.9	CYP26B1	12.9956	4.18349	0.898333	4.65695	3.20935e-06	2.89536e-05	chr2:72129238-72147862	-	4.05552	0	0	24.4607	21.4199	28.0377
ENSG00000165548.11	TMEM63C	99.8811	-1.03266	0.221946	-4.65277	3.27508e-06	2.95346e-05	chr14:77116568-77259495	+	124.707	149.998	127.939	52.8352	71.7102	72.0969
ENSG00000125931.11	CITED1	31.9144	1.95241	0.420665	4.64124	3.4632e-06	3.11293e-05	chrX:72301638-72307187	-	15.2082	5.31907	18.556	55.7704	46.5651	50.0673
ENSG00000149948.14	HMGA2	67.9322	-1.31095	0.282495	-4.64063	3.47342e-06	3.11958e-05	chr12:65824460-65966291	+	94.2909	103.19	92.7802	43.0509	24.2138	50.0673
ENSG00000153012.12	LGI2	19.6021	2.74114	0.592775	4.62425	3.75959e-06	3.35748e-05	chr4:24998847-25030946	-	2.02776	7.4467	5.8598	20.547	31.6642	50.0673
ENSG00000231298.7	MANCR	20.2284	2.58925	0.560684	4.61802	3.87411e-06	3.44719e-05	chr10:4650158-4678185	-	2.02776	7.4467	7.81307	46.9646	26.0764	31.0417
ENSG00000274964.1	RP11-817I4.1	63.5008	-1.27068	0.27577	-4.60776	4.07035e-06	3.60727e-05	chr12:32339368-32340724	+	88.2076	88.2966	92.7802	47.943	30.7329	33.0444
ENSG00000166351.11	POTED	11.8954	6.00568	1.30343	4.6076	4.07343e-06	3.60855e-05	chr21:13609777-13645823	+	1.01388	0	0	29.3529	13.9695	27.0363
ENSG00000253976.1	RP11-386G21.1	16.3286	-2.76162	0.600142	-4.60161	4.19242e-06	3.71247e-05	chr8:55135203-55142358	-	34.4719	25.5316	25.3925	3.91372	4.65651	4.00538
ENSG00000286625.1	RP11-124O5.2	11.7179	5.98453	1.30079	4.6007	4.21069e-06	3.72609e-05	chr5:25963839-25990687	+	0	0	0.976633	21.5254	16.7634	31.0417
ENSG00000135917.16	SLC19A3	14.2908	-3.14413	0.683673	-4.59888	4.2476e-06	3.75531e-05	chr2:227683763-227718028	-	24.3331	23.4039	29.299	0.978429	3.7252	4.00538
ENSG00000167549.19	CORO6	60.3619	-1.28115	0.279058	-4.59097	4.412e-06	3.89286e-05	chr17:29614756-29622912	-	74.0133	95.7433	86.9204	30.3313	39.1146	36.0485
ENSG00000279628.1	RP11-467L19.14	72.6226	1.3078	0.285143	4.58649	4.50766e-06	3.9725e-05	chr15:20658900-20664970	+	37.5136	30.8506	56.6447	120.347	78.2293	112.151
ENSG00000186998.16	EMID1	107.442	1.00347	0.219276	4.57628	4.73309e-06	4.15623e-05	chr22:29205896-29259597	+	75.0271	71.2756	68.3643	116.433	171.359	142.191
ENSG00000165895.19	ARHGAP42	76.7557	1.14378	0.250495	4.56609	4.96907e-06	4.34445e-05	chr11:100687288-100993941	+	58.8051	44.6802	40.042	113.498	103.374	100.135
ENSG00000271614.1	ATP2B1-AS1	16.6976	2.72208	0.59644	4.56389	5.02148e-06	4.38679e-05	chr12:89708959-89712590	+	3.04164	4.25526	5.8598	30.3313	31.6642	25.0337
ENSG00000165300.8	SLITRK5	7.09934	6.24574	1.36971	4.55991	5.11751e-06	4.46362e-05	chr13:87671371-87696272	+	0	0	0	17.6117	13.9695	11.0148
ENSG00000115596.4	WNT6	68.9313	-1.27023	0.278671	-4.55818	5.15978e-06	4.49871e-05	chr2:218859805-218874233	+	108.485	86.169	97.6633	55.7704	34.4581	31.0417
ENSG00000130224.15	LRCH2	68.4673	1.2094	0.265534	4.55457	5.24917e-06	4.57304e-05	chrX:115110616-115234096	-	39.5413	40.425	43.9485	85.1233	86.611	115.155
ENSG00000196440.11	ARMCX4	21.6249	-2.4297	0.534626	-4.54468	5.50191e-06	4.7725e-05	chrX:101418287-101533459	+	48.6663	39.3611	21.4859	3.91372	9.31301	7.00942
ENSG00000116329.11	OPRD1	36.2689	1.79376	0.395247	4.53833	5.67004e-06	4.9092e-05	chr1:28812142-28871267	+	10.1388	17.021	21.4859	75.339	46.5651	47.0633
ENSG00000206432.4	TMEM200C	92.9757	1.05002	0.231544	4.53488	5.76356e-06	4.98184e-05	chr18:5882072-5895955	-	76.041	47.8717	57.6214	126.217	122.932	127.171
ENSG00000149050.10	ZNF214	29.724	1.85839	0.410589	4.52615	6.00666e-06	5.18386e-05	chr11:6997085-7020346	-	13.1804	10.6381	14.6495	55.7704	40.046	44.0592
ENSG00000175352.11	NRIP3	14.7103	3.28192	0.727149	4.5134	6.37965e-06	5.48218e-05	chr11:8980576-9004049	-	3.04164	5.31907	0	19.5686	23.2825	37.0498
ENSG00000196208.14	GREB1	28.5396	-1.92452	0.426395	-4.51347	6.37756e-06	5.48218e-05	chr2:11482341-11642788	+	50.694	47.8717	37.1121	9.78429	16.7634	9.01211
ENSG00000223551.1	TMSB4XP4	48.2664	-1.42765	0.316769	-4.5069	6.57804e-06	5.64168e-05	chr9:128342153-128342770	+	80.0965	74.467	56.6447	29.3529	27.0077	22.0296
ENSG00000162746.14	FCRLB	31.6642	1.78398	0.396063	4.50429	6.65948e-06	5.70931e-05	chr1:161721563-161728143	+	15.2082	14.8934	12.6962	58.7057	48.4277	40.0538
ENSG00000135519.8	KCNH3	147.142	1.04835	0.232991	4.49954	6.81001e-06	5.83383e-05	chr12:49539030-49558337	+	83.1382	131.913	73.2475	149.7	249.589	195.262
ENSG00000136542.9	GALNT5	107.64	-1.01149	0.224863	-4.49824	6.85183e-06	5.8651e-05	chr2:157257705-157318491	+	163.235	152.126	116.219	75.339	56.8094	82.1104
ENSG00000229425.3	AJ006998.2	11.9394	-5.17246	1.15257	-4.48778	7.19684e-06	6.14375e-05	chr21:15368966-15627342	-	23.3192	18.0848	28.3224	0.978429	0.931301	0
ENSG00000213967.11	ZNF726	10.6658	-5.91769	1.32493	-4.46643	7.95366e-06	6.75847e-05	chr19:23914876-23945159	+	10.1388	25.5316	27.3457	0.978429	0	0
ENSG00000065989.16	PDE4A	27.9019	1.93505	0.434359	4.45496	8.39075e-06	7.11072e-05	chr19:10416773-10469630	+	15.2082	12.7658	6.83643	37.1803	49.359	46.0619
ENSG00000142449.13	FBN3	11.4545	-4.05456	0.910175	-4.4547	8.40101e-06	7.11668e-05	chr19:8065402-8149592	-	18.2498	19.1487	27.3457	0.978429	0	3.00404
ENSG00000197934.8	CYYR1-AS1	17.8127	-2.56726	0.577162	-4.44808	8.66404e-06	7.32825e-05	chr21:26393635-26569252	+	25.347	32.9783	33.2055	1.95686	8.38171	5.00673
ENSG00000218336.9	TENM3	6.68089	-6.23033	1.40123	-4.44632	8.73537e-06	7.38575e-05	chr4:182143987-182803024	+	11.1527	7.4467	21.4859	0	0	0
ENSG00000260947.1	RP11-384P7.7	11.8919	3.70189	0.833098	4.44353	8.84962e-06	7.47662e-05	chr9:33697459-33700986	+	1.01388	2.12763	1.95327	21.5254	17.6947	27.0363
ENSG00000110675.13	ELMOD1	42.3327	1.51166	0.34029	4.44227	8.90133e-06	7.51456e-05	chr11:107591091-107666779	+	15.2082	22.3401	28.3224	64.5763	61.4659	62.0835
ENSG00000264472.4	RP11-861L17.3	38.1164	1.69376	0.38164	4.43811	9.07517e-06	7.65547e-05	chr18:68899781-68902255	-	12.1666	23.4039	18.556	66.5332	67.985	40.0538
ENSG00000189221.10	MAOA	24.0415	-2.04058	0.460143	-4.43467	9.22125e-06	7.76978e-05	chrX:43654907-43746824	+	45.6246	36.1697	34.1822	8.80586	7.45041	12.0162
ENSG00000203808.12	BVES-AS1	55.4796	-1.299	0.293315	-4.42869	9.48073e-06	7.97017e-05	chr6:105136308-105169952	+	65.9022	93.6157	77.154	32.2882	28.8703	35.0471
ENSG00000229224.2	AC105398.3	12.4445	-3.56201	0.804336	-4.4285	9.48893e-06	7.97403e-05	chr2:29088649-29097586	-	29.4025	15.9572	23.4392	0	1.8626	4.00538
ENSG00000287066.1	AP000962.4	53.6544	-1.41013	0.318565	-4.42652	9.57663e-06	8.0416e-05	chr21:16505555-16507916	-	60.8328	87.2328	85.9437	38.1587	30.7329	19.0256
ENSG00000270823.1	RP11-2E11.6	26.0455	-1.90085	0.429536	-4.42535	9.62855e-06	8.08212e-05	chr7:130495794-130498427	-	38.5275	44.6802	40.042	10.7627	10.2443	12.0162
ENSG00000204706.14	MAMDC2-AS1	42.1008	-1.55298	0.351243	-4.42138	9.8072e-06	8.21958e-05	chr9:70033921-70175888	-	48.6663	71.2756	68.3643	16.6333	18.626	29.039
ENSG00000164099.3	PRSS12	46.9819	-1.39779	0.316502	-4.41636	1.00375e-05	8.39665e-05	chr4:118280038-118353003	-	81.1104	61.7013	61.5279	28.3744	25.1451	24.0323
ENSG00000249717.1	PARM1-AS1	10.455	5.81982	1.31868	4.41337	1.01773e-05	8.50718e-05	chr4:74955974-74970362	-	1.01388	0	0	26.4176	23.2825	12.0162
ENSG00000033122.21	LRRC7	39.2198	-1.83606	0.416759	-4.40556	1.05511e-05	8.7963e-05	chr1:69567922-70151945	+	71.9855	53.1907	58.598	32.2882	10.2443	9.01211
ENSG00000185483.12	ROR1	53.1889	1.29184	0.293383	4.40327	1.06633e-05	8.88317e-05	chr1:63774017-64181498	+	34.4719	29.7868	28.3224	80.2312	78.2293	68.0915
ENSG00000227115.8	LINC01630	13.8044	-3.09774	0.704152	-4.39925	1.08626e-05	9.03212e-05	chr18:51346249-51643939	+	21.2915	26.5954	26.3691	3.91372	4.65651	0
ENSG00000251396.7	LINC01301	52.1891	-1.34583	0.306145	-4.39606	1.10236e-05	9.15564e-05	chr8:60289928-60516795	-	63.8745	78.7223	82.0372	37.1803	23.2825	28.0377
ENSG00000112782.19	CLIC5	12.8137	-3.16127	0.721199	-4.38335	1.1687e-05	9.67746e-05	chr6:45880827-46080348	-	28.3887	21.2763	19.5327	1.95686	3.7252	2.00269
ENSG00000253549.6	CA3-AS1	14.6117	-2.84735	0.651829	-4.36824	1.25251e-05	0.000103289	chr8:85440596-85464915	-	23.3192	22.3401	31.2523	1.95686	2.7939	6.00808
ENSG00000179104.9	TMTC2	18.5743	2.34561	0.537795	4.36154	1.2915e-05	0.000106226	chr12:82686880-83134870	+	4.05552	7.4467	6.83643	30.3313	30.7329	32.0431
ENSG00000107159.13	CA9	494.553	-1.39713	0.320424	-4.36025	1.29915e-05	0.000106776	chr9:35673918-35681159	+	1028.07	530.844	591.84	274.939	294.291	247.332
ENSG00000162105.20	SHANK2	27.9375	-1.91741	0.439905	-4.35869	1.30845e-05	0.000107501	chr11:70467854-71252577	-	44.6107	46.8078	41.0186	6.849	9.31301	19.0256
ENSG00000287979.1	CH17-3B23.3	39.3648	1.61447	0.370443	4.35821	1.31132e-05	0.000107696	chr1:120849674-120850985	-	28.3887	18.0848	11.7196	59.6842	51.2216	67.0902
ENSG00000078549.15	ADCYAP1R1	6.06507	-6.08886	1.39973	-4.35002	1.36127e-05	0.000111549	chr7:31052308-31111479	+	12.1666	9.57433	14.6495	0	0	0
ENSG00000174939.11	ASPHD1	44.556	1.50175	0.345448	4.34724	1.3786e-05	0.000112885	chr16:29900375-29919864	+	26.3609	14.8934	28.3224	50.8783	70.7789	76.1023
ENSG00000164220.7	F2RL2	25.102	2.03533	0.468472	4.34462	1.39519e-05	0.00011416	chr5:76615482-76623413	-	15.2082	8.51052	5.8598	47.943	40.046	33.0444
ENSG00000244242.2	IFITM10	60.4421	-1.3541	0.311805	-4.3428	1.40678e-05	0.00011498	chr11:1732406-1750595	-	90.2354	93.6157	77.154	24.4607	52.1529	25.0337
ENSG00000142623.11	PADI1	10.6399	-4.39646	1.01298	-4.34013	1.42401e-05	0.000116302	chr1:17205128-17246007	+	27.3748	17.021	16.6028	0.978429	1.8626	0
ENSG00000164626.9	KCNK5	22.1806	2.08569	0.4813	4.33345	1.46794e-05	0.000119801	chr6:39188971-39229475	-	8.11104	7.4467	9.76633	43.0509	31.6642	33.0444
ENSG00000198216.12	CACNA1E	12.1835	-3.28091	0.757939	-4.32872	1.49975e-05	0.000122172	chr1:181317690-181808084	+	27.3748	21.2763	17.5794	2.93529	0.931301	3.00404
ENSG00000104419.17	NDRG1	7924.63	-1.14992	0.266225	-4.31937	1.56475e-05	0.000127045	chr8:133237175-133302022	-	14622.2	7782.87	10371.8	4757.12	5201.32	4812.47
ENSG00000162777.17	DENND2D	37.7448	1.58219	0.366508	4.31693	1.58217e-05	0.000128365	chr1:111185969-111204535	-	17.236	15.9572	23.4392	45.9862	70.7789	53.0713
ENSG00000169249.13	ZRSR2	68.7019	-1.22498	0.284062	-4.31236	1.61519e-05	0.000130851	chrX:15790472-15823260	+	124.707	93.6157	70.3176	43.0509	34.4581	46.0619
ENSG00000166206.15	GABRB3	27.3306	1.89805	0.440284	4.31097	1.62544e-05	0.000131633	chr15:26543546-26939539	-	11.1527	13.8296	9.76633	57.7273	34.4581	37.0498
ENSG00000249425.1	LINC02477	6.03191	-6.08223	1.41385	-4.30188	1.69355e-05	0.000136647	chr4:160539254-160586817	+	9.12492	8.51052	18.556	0	0	0
ENSG00000065361.17	ERBB3	76.5177	1.2202	0.283655	4.30169	1.69497e-05	0.000136712	chr12:56076799-56103505	+	39.5413	56.3822	41.9952	128.174	69.8476	123.166
ENSG00000229236.3	TTTY10	6.07946	-6.09165	1.41623	-4.30131	1.69793e-05	0.000136901	chrY:20464916-20575519	-	19.2637	7.4467	9.76633	0	0	0
ENSG00000130762.15	ARHGEF16	14.7839	-3.19948	0.743912	-4.30088	1.70118e-05	0.000137113	chr1:3454665-3481113	+	33.4581	7.4467	39.0653	2.93529	2.7939	3.00404
ENSG00000223760.4	MED15P9	11.5775	-3.74655	0.871648	-4.29824	1.7216e-05	0.000138706	chr2:130129621-130139417	+	23.3192	28.723	12.6962	0	3.7252	1.00135
ENSG00000147642.17	SYBU	22.2429	-2.09891	0.48871	-4.2948	1.74851e-05	0.000140722	chr8:109573978-109691791	-	27.3748	44.6802	36.1354	5.87057	8.38171	11.0148
ENSG00000102466.16	FGF14	9.17405	-5.69681	1.32718	-4.29241	1.76746e-05	0.000142144	chr13:101710804-102402457	-	21.2915	19.1487	13.6729	0	0.931301	0
ENSG00000171428.15	NAT1	94.0858	1.02616	0.2391	4.29176	1.77259e-05	0.000142504	chr8:18170477-18223689	+	70.9716	53.1907	61.5279	145.786	96.8553	136.183
ENSG00000198626.17	RYR2	25.5613	1.89823	0.442785	4.28702	1.81085e-05	0.000145315	chr1:237042184-237833988	+	14.1943	7.4467	10.743	41.094	42.8399	37.0498
ENSG00000280744.1	LINC01173	15.9941	-2.60799	0.609069	-4.28192	1.85287e-05	0.000148525	chr2:234682668-234717764	+	35.4858	25.5316	21.4859	5.87057	5.58781	2.00269
ENSG00000177076.6	ACER2	65.7073	1.13925	0.266441	4.2758	1.90454e-05	0.000152391	chr9:19409009-19452505	+	45.6246	40.425	37.1121	100.778	92.1988	78.105
ENSG00000185046.19	ANKS1B	12.7154	3.06443	0.717083	4.27347	1.92454e-05	0.000153936	chr12:98726457-99984654	-	2.02776	3.19144	2.9299	23.4823	18.626	26.035
ENSG00000076770.15	MBNL3	52.268	1.25998	0.295491	4.26401	2.0079e-05	0.000160197	chrX:132369317-132489968	-	28.3887	28.723	35.1588	79.2527	67.985	74.0996
ENSG00000163888.4	CAMK2N2	80.7481	1.04283	0.244748	4.26084	2.03664e-05	0.000162313	chr3:184259213-184261553	-	43.5969	51.0631	63.4812	117.411	97.7866	111.149
ENSG00000151702.17	FLI1	12.2076	-3.30723	0.776603	-4.25858	2.05726e-05	0.000163839	chr11:128686535-128813267	+	25.347	14.8934	26.3691	0.978429	4.65651	1.00135
ENSG00000113448.19	PDE4D	35.5165	1.52727	0.359777	4.24506	2.18537e-05	0.000172918	chr5:58969038-60522120	-	17.236	18.0848	19.5327	50.8783	50.2903	57.0767
ENSG00000183833.16	CFAP91	5.83503	-6.02831	1.4206	-4.2435	2.20061e-05	0.000173937	chr3:119703022-119767102	+	11.1527	17.021	6.83643	0	0	0
ENSG00000144810.16	COL8A1	60.1965	1.29677	0.305982	4.23806	2.2546e-05	0.000177886	chr3:99638475-99799226	+	32.4442	47.8717	24.4158	68.49	83.8171	104.14
ENSG00000182218.10	HHIPL1	39.4825	-1.51718	0.358889	-4.22744	2.36361e-05	0.000186221	chr14:99645129-99680569	+	54.7495	67.0203	53.7148	14.6764	17.6947	29.039
ENSG00000135525.19	MAP7	38.504	-1.44339	0.341524	-4.22632	2.37546e-05	0.000186909	chr6:136342281-136550819	-	53.7357	58.5098	56.6447	20.547	19.5573	22.0296
ENSG00000280623.1	PCAT14	10.4131	-4.96286	1.17424	-4.22644	2.37417e-05	0.000186909	chr22:23536881-23547797	+	20.2776	26.5954	13.6729	0	0.931301	1.00135
ENSG00000231240.1	KLF2P1	10.4573	-4.96958	1.17598	-4.2259	2.37986e-05	0.000187167	chr2:130036958-130038422	+	26.3609	14.8934	19.5327	1.95686	0	0
ENSG00000253250.3	C8orf88	46.4381	1.38809	0.32891	4.22028	2.43996e-05	0.000191416	chr8:90958471-90985238	-	32.4442	18.0848	26.3691	79.2527	62.3972	60.0808
ENSG00000128965.13	CHAC1	83.016	1.03669	0.245834	4.21704	2.47533e-05	0.000194122	chr15:40952962-40956512	+	66.9161	41.4888	54.6915	100.778	121.069	113.152
ENSG00000266578.2	RP11-838N2.5	14.4204	2.74875	0.653405	4.20681	2.59003e-05	0.000202327	chr18:3284120-3330984	+	2.02776	5.31907	3.90653	28.3744	28.8703	18.0242
ENSG00000140287.11	HDC	26.9248	-1.85634	0.442151	-4.19842	2.68778e-05	0.000209518	chr15:50241947-50265965	-	28.3887	54.2545	43.9485	13.698	10.2443	11.0148
ENSG00000286174.1	RP11-3L21.3	19.9726	2.37962	0.56792	4.19007	2.78872e-05	0.000217156	chr1:224703272-224712849	-	8.11104	6.38289	4.88317	23.4823	54.9468	22.0296
ENSG00000166401.15	SERPINB8	110.895	-1.02597	0.247173	-4.15083	3.31277e-05	0.00025464	chr18:63970029-64019779	+	107.471	193.614	145.518	65.5547	93.1301	60.0808
ENSG00000159640.17	ACE	11.9937	-3.05226	0.736369	-4.14502	3.3978e-05	0.000260361	chr17:63477061-63498380	+	17.236	25.5316	21.4859	3.91372	2.7939	1.00135
ENSG00000185008.17	ROBO2	8.6087	5.53277	1.33634	4.14025	3.46923e-05	0.000265281	chr3:75906695-77649964	+	0	0	0.976633	14.6764	13.9695	22.0296
ENSG00000270533.2	bP-21201H5.1	26.7275	2.02067	0.488078	4.14005	3.47234e-05	0.000265427	chr21:9975017-10119309	-	17.236	10.6381	3.90653	57.7273	29.8016	41.0552
ENSG00000241859.7	ANOS2P	8.372	-5.55914	1.3435	-4.1378	3.50649e-05	0.000267759	chrY:13703902-13915824	+	14.1943	22.3401	12.6962	0	0	1.00135
ENSG00000153237.18	CCDC148	60.858	1.17106	0.283245	4.13445	3.55799e-05	0.000271504	chr2:158171073-158456753	-	37.5136	27.6592	46.8784	77.2959	85.6797	90.1211
ENSG00000262576.3	PCDHGA4	61.5022	1.17586	0.284677	4.13051	3.61962e-05	0.00027554	chr5:141355021-141512975	+	40.5552	42.5526	30.2756	67.5116	94.9927	93.1252
ENSG00000205929.11	C21orf62	15.1814	-2.51534	0.609645	-4.12591	3.69266e-05	0.000280713	chr21:32790673-32813743	-	31.4303	26.5954	19.5327	2.93529	5.58781	5.00673
ENSG00000278971.1	RP11-644A7.2	24.1117	-1.86796	0.453432	-4.1196	3.79528e-05	0.000287821	chr18:70489630-70491205	+	37.5136	32.9783	42.9719	8.80586	8.38171	14.0188
ENSG00000115616.3	SLC9A2	12.6923	2.8682	0.6964	4.11862	3.81154e-05	0.000288756	chr2:102619553-102711355	+	4.05552	3.19144	1.95327	19.5686	22.3512	25.0337
ENSG00000219902.1	RPL35P3	15.0619	-2.75057	0.668687	-4.1134	3.89882e-05	0.000294761	chr6:105302453-105302823	-	22.3054	31.9144	24.4158	0	3.7252	8.01077
ENSG00000216639.1	RP3-355L5.3	23.3103	-1.98107	0.482164	-4.1087	3.97891e-05	0.000300508	chr6:105298149-105298895	+	29.4025	48.9355	33.2055	6.849	7.45041	14.0188
ENSG00000259905.7	PWRN1	21.9434	1.99547	0.486306	4.10333	4.07242e-05	0.00030736	chr15:24101827-24823365	+	6.08328	9.57433	10.743	28.3744	42.8399	34.0458
ENSG00000278962.1	RP11-399B17.1	25.7056	1.80151	0.43919	4.10189	4.09782e-05	0.000309171	chr2:112188364-112190635	+	10.1388	8.51052	15.6261	39.1372	43.7712	37.0498
ENSG00000147606.9	SLC26A7	34.2794	1.63523	0.400736	4.08057	4.49263e-05	0.000336772	chr8:91209494-91398155	+	18.2498	21.2763	10.743	62.6194	57.7407	35.0471
ENSG00000233836.7	ZNF726P1	41.3255	1.37108	0.336117	4.07917	4.51964e-05	0.000338568	chr19:23762944-23833314	+	27.3748	20.2125	21.4859	58.7057	53.0842	67.0902
ENSG00000060709.15	RIMBP2	9.67272	-4.25646	1.04482	-4.07387	4.62389e-05	0.000345907	chr12:130396137-130716281	-	14.1943	11.702	29.299	0.978429	1.8626	0
ENSG00000082196.21	C1QTNF3	28.7192	1.65478	0.40694	4.06639	4.77463e-05	0.000356513	chr5:34017858-34043213	-	14.1943	10.6381	16.6028	40.1156	44.7025	46.0619
ENSG00000113083.15	LOX	404.226	-1.40568	0.345696	-4.06622	4.77808e-05	0.000356546	chr5:122063195-122078413	-	802.993	353.186	604.536	239.715	221.65	203.273
ENSG00000235448.3	LURAP1L-AS1	20.0998	2.05812	0.506346	4.06464	4.81067e-05	0.000358543	chr9:12698554-12814377	-	6.08328	7.4467	9.76633	37.1803	26.0764	34.0458
ENSG00000146216.13	TTBK1	9.31682	-4.18911	1.03076	-4.06411	4.82151e-05	0.000359108	chr6:43243481-43288258	+	13.1804	21.2763	18.556	1.95686	0.931301	0
ENSG00000171121.16	KCNMB3	44.2422	1.34432	0.330948	4.06202	4.86509e-05	0.00036211	chr3:179236691-179267002	-	29.4025	18.0848	27.3457	67.5116	54.0155	69.0929
ENSG00000157570.12	TSPAN18	11.7711	-3.22665	0.797503	-4.04594	5.21143e-05	0.000385677	chr11:44726465-44932423	+	20.2776	18.0848	25.3925	5.87057	0	1.00135
ENSG00000196074.13	SYCP2	35.955	1.44307	0.357042	4.04174	5.3056e-05	0.000392121	chr20:59863564-59933655	-	20.2776	20.2125	17.5794	48.9214	58.672	50.0673
ENSG00000249378.6	LINC01060	11.2368	3.07744	0.761627	4.04061	5.33117e-05	0.000393747	chr4:188400736-188681051	+	2.02776	3.19144	1.95327	21.5254	17.6947	21.0283
ENSG00000151790.9	TDO2	19.3292	2.13988	0.529788	4.03912	5.36525e-05	0.000395765	chr4:155854738-155920406	+	10.1388	7.4467	3.90653	32.2882	25.1451	37.0498
ENSG00000156140.10	ADAMTS3	18.3532	2.14244	0.531076	4.03414	5.4803e-05	0.000403681	chr4:72280969-72569221	-	6.08328	7.4467	6.83643	30.3313	35.3894	24.0323
ENSG00000100156.11	SLC16A8	18.869	-2.10646	0.522647	-4.03036	5.56912e-05	0.000409813	chr22:38078134-38084093	-	28.3887	36.1697	27.3457	9.78429	6.51911	5.00673
ENSG00000286658.1	RP4-537P9.1	42.3241	1.37154	0.34043	4.02885	5.60512e-05	0.000412188	chr7:50641725-50643868	+	20.2776	18.0848	32.2289	66.5332	57.7407	59.0794
ENSG00000082684.16	SEMA5B	63.615	-1.27164	0.315896	-4.0255	5.68542e-05	0.000417397	chr3:122909082-123028605	-	125.721	69.148	75.2008	38.1587	48.4277	25.0337
ENSG00000136541.15	ERMN	7.91614	5.40984	1.34409	4.02492	5.69949e-05	0.000418291	chr2:157318631-157327713	-	1.01388	0	0	13.698	16.7634	16.0215
ENSG00000128040.11	SPINK2	16.1781	2.30572	0.57371	4.01896	5.8455e-05	0.000428437	chr4:56809860-56821742	-	6.08328	6.38289	3.90653	28.3744	23.2825	29.039
ENSG00000286214.1	COPG2IT1	23.4839	-1.81911	0.453227	-4.01367	5.97808e-05	0.000437138	chr7:130538954-130546900	+	32.4442	37.2335	40.042	9.78429	8.38171	13.0175
ENSG00000186910.4	SERPINA11	5.42553	5.86013	1.46195	4.00845	6.11189e-05	0.000446427	chr14:94442464-94452800	-	0	0	0	3.91372	18.626	10.0135
ENSG00000264230.9	ANXA8L1	13.8965	-2.75429	0.688047	-4.00306	6.25281e-05	0.000456472	chr10:46375627-46391784	+	20.2776	29.7868	22.4626	0.978429	1.8626	8.01077
ENSG00000163376.11	KBTBD8	56.1888	1.33044	0.332416	4.00233	6.2723e-05	0.000457592	chr3:66998307-67011210	+	27.3748	22.3401	45.9018	105.67	57.7407	78.105
ENSG00000169035.12	KLK7	4.92566	-5.78651	1.44625	-4.00103	6.30666e-05	0.000459604	chr19:50976468-50984099	-	12.1666	9.57433	7.81307	0	0	0
ENSG00000148204.12	CRB2	30.4593	-1.64123	0.410982	-3.99345	6.512e-05	0.000473358	chr9:123356170-123380324	+	38.5275	39.3611	60.5513	11.7411	19.5573	13.0175
ENSG00000273297.2	RP11-38M8.1	9.23234	4.71268	1.18026	3.99291	6.52679e-05	0.000474121	chr7:134368737-134432534	-	0	1.06381	0.976633	16.6333	17.6947	19.0256
ENSG00000224549.1	RP11-370B11.3	20.5513	1.94417	0.487175	3.9907	6.58788e-05	0.000478244	chr9:22767175-22768316	+	9.12492	8.51052	7.81307	35.2234	32.5955	30.0404
ENSG00000244161.1	FLNB-AS1	34.7234	-1.66057	0.416189	-3.98994	6.60897e-05	0.000479549	chr3:58162547-58170636	-	69.9577	29.7868	58.598	13.698	23.2825	13.0175
ENSG00000158525.16	CPA5	7.46475	-5.39201	1.35422	-3.98165	6.84389e-05	0.000494552	chr7:130344816-130368730	+	13.1804	15.9572	14.6495	0	0	1.00135
ENSG00000260412.1	RP11-438B23.2	36.86	-1.42461	0.357887	-3.9806	6.87411e-05	0.000496249	chr9:27937617-27944497	-	49.6801	48.9355	62.5045	24.4607	19.5573	16.0215
ENSG00000279998.1	CH507-210P18.1	4.98366	5.73617	1.44139	3.97962	6.90251e-05	0.000497811	chr21:6789592-6812297	+	0	0	0	9.78429	12.1069	8.01077
ENSG00000198153.8	ZNF849P	5.01578	-5.8166	1.46484	-3.9708	7.16316e-05	0.000515094	chr19:22685167-22686732	+	12.1666	4.25526	13.6729	0	0	0
ENSG00000258955.2	LINC00519	23.3664	1.78417	0.449568	3.96863	7.22871e-05	0.000518794	chr14:51304108-51331918	-	11.1527	10.6381	9.76633	36.2019	35.3894	37.0498
ENSG00000265590.10	CFAP298-TCP10L	53.3623	-1.16529	0.293708	-3.96753	7.26206e-05	0.000520849	chr21:32402511-32612865	-	64.8883	75.5308	81.0606	27.396	37.252	34.0458
ENSG00000170293.9	CMTM8	49.9124	1.20711	0.304678	3.96192	7.43486e-05	0.000531344	chr3:32238679-32370321	+	27.3748	30.8506	32.2289	79.2527	58.672	71.0956
ENSG00000231764.10	DLX6-AS1	49.1202	-1.22303	0.309002	-3.958	7.55788e-05	0.000539786	chr7:96955141-97014088	-	74.0133	77.6585	54.6915	31.3097	27.0077	30.0404
ENSG00000099725.14	PRKY	10.4968	-3.29959	0.833951	-3.95657	7.6033e-05	0.000542854	chrY:7273972-7381548	+	23.3192	20.2125	13.6729	3.91372	1.8626	0
ENSG00000285517.1	LINC00941	51.543	1.15771	0.292716	3.95506	7.6517e-05	0.000546133	chr12:30795458-30879268	+	31.4303	34.0421	30.2756	71.4253	67.985	74.0996
ENSG00000223492.1	RP11-15M15.1	9.59276	-3.44155	0.8721	-3.94628	7.93752e-05	0.00056398	chr20:53168643-53179550	-	16.2221	15.9572	20.5093	2.93529	0.931301	1.00135
ENSG00000165521.15	EML5	29.87	1.5829	0.401272	3.94471	7.98969e-05	0.000566957	chr14:88612431-88792752	-	16.2221	17.021	11.7196	45.9862	51.2216	37.0498
ENSG00000165694.10	FRMD7	44.3497	-1.58377	0.401743	-3.94224	8.07244e-05	0.000572461	chrX:132076990-132128020	-	46.6385	75.5308	77.154	32.2882	7.45041	27.0363
ENSG00000237880.2	LINC01885	4.84776	5.69495	1.44706	3.93553	8.30122e-05	0.000587365	chr2:107382715-107748270	-	0	0	0	7.82743	10.2443	11.0148
ENSG00000134061.5	CD180	12.9219	-2.65772	0.675696	-3.9333	8.37861e-05	0.000592271	chr5:67179613-67196799	-	28.3887	18.0848	20.5093	1.95686	5.58781	3.00404
ENSG00000162975.5	KCNF1	70.5515	1.26071	0.320784	3.93009	8.49152e-05	0.000599101	chr2:10911934-10914225	+	54.7495	27.6592	41.9952	132.088	58.672	108.145
ENSG00000250436.1	LINC02499	9.02449	4.68117	1.1932	3.92319	8.73827e-05	0.000615134	chr4:73508803-73534128	+	2.02776	0	0	17.6117	20.4886	14.0188
ENSG00000138639.18	ARHGAP24	4.86543	-5.77187	1.47207	-3.92092	8.82104e-05	0.000620367	chr4:85475150-86002668	+	14.1943	4.25526	10.743	0	0	0
ENSG00000286232.1	RP11-723K16.1	26.3876	-1.72004	0.438992	-3.91816	8.92257e-05	0.000626909	chr20:61267525-61271827	-	50.694	41.4888	29.299	15.6549	11.1756	10.0135
ENSG00000126803.10	HSPA2	39.3255	-1.56409	0.400238	-3.90789	9.31054e-05	0.000651679	chr14:64535905-64546173	+	62.8606	46.8078	66.4111	12.7196	12.1069	35.0471
ENSG00000124102.5	PI3	7.23641	-5.35029	1.36996	-3.90543	9.40574e-05	0.000657716	chr20:45174902-45176544	+	9.12492	13.8296	19.5327	0	0.931301	0
ENSG00000188783.6	PRELP	34.5382	-1.43253	0.366866	-3.90478	9.43101e-05	0.000659275	chr1:203475806-203491352	+	45.6246	49.9993	55.6681	16.6333	23.2825	16.0215
ENSG00000250320.6	EDIL3-DT	50.466	1.23237	0.316513	3.89358	9.87761e-05	0.00068723	chr5:84382424-84490765	+	38.5275	24.4677	27.3457	55.7704	73.5728	83.1117
ENSG00000188219.15	POTEE	38.1856	-1.48333	0.381064	-3.8926	9.9174e-05	0.000689781	chr2:131209536-131265278	+	35.4858	76.5947	56.6447	21.5254	15.8321	23.031
ENSG00000076826.10	CAMSAP3	52.0621	-1.19969	0.308648	-3.88691	0.000101529	0.000704828	chr19:7595863-7618304	+	74.0133	73.4032	70.3176	20.547	40.046	34.0458
ENSG00000236751.2	LINC01186	8.60687	-4.06056	1.04707	-3.87802	0.00010531	0.000729062	chrX:46256759-46327680	-	11.1527	17.021	20.5093	1.95686	0	1.00135
ENSG00000261210.8	CLEC19A	17.2725	-2.11299	0.544967	-3.87729	0.000105627	0.000730981	chr16:19285731-19322145	+	30.4164	23.4039	30.2756	5.87057	4.65651	9.01211
ENSG00000149295.14	DRD2	4.58559	-5.68334	1.46724	-3.87348	0.000107292	0.000742037	chr11:113409605-113475691	-	12.1666	8.51052	6.83643	0	0	0
ENSG00000236242.1	MYO16-AS1	4.69024	-5.71937	1.47784	-3.87009	0.000108795	0.000751802	chr13:109163902-109201483	-	12.1666	4.25526	11.7196	0	0	0
ENSG00000285780.2	RP11-784B9.1	14.039	2.41863	0.625045	3.86953	0.000109046	0.000753222	chr3:89283016-89314604	-	5.0694	5.31907	2.9299	27.396	20.4886	23.031
ENSG00000134595.9	SOX3	10.2753	-3.01223	0.780484	-3.85944	0.000113648	0.00078403	chrX:140502985-140505069	-	21.2915	15.9572	17.5794	1.95686	1.8626	3.00404
ENSG00000187550.9	SBK2	8.51134	-4.05311	1.05033	-3.85889	0.000113904	0.000785245	chr19:55528611-55537133	-	15.2082	21.2763	11.7196	0	1.8626	1.00135
ENSG00000144452.15	ABCA12	23.6376	-1.78939	0.463833	-3.85783	0.0001144	0.000788231	chr2:214931542-215138626	-	29.4025	43.6164	37.1121	9.78429	14.9008	7.00942
ENSG00000273812.3	WI2-87327B8.2	9.12444	-3.73203	0.970347	-3.84607	0.000120025	0.000823648	chr20:62596732-62603355	-	19.2637	18.0848	13.6729	0	3.7252	0
ENSG00000253227.2	RP11-383J24.1	24.4046	1.80314	0.469466	3.84083	0.000122619	0.000839098	chr8:124271667-124279580	+	11.1527	12.7658	8.7897	45.9862	44.7025	23.031
ENSG00000185633.10	NDUFA4L2	29.2908	1.55713	0.405688	3.83825	0.000123913	0.000846908	chr12:57234903-57240715	-	14.1943	12.7658	17.5794	42.0724	53.0842	36.0485
ENSG00000005379.17	TSPOAP1	8.58743	-4.05163	1.05633	-3.83558	0.000125269	0.000855112	chr17:58301228-58328795	-	16.2221	12.7658	19.5327	0	0	3.00404
ENSG00000069020.18	MAST4	42.965	1.2765	0.333132	3.83182	0.000127197	0.000866397	chr5:66596361-67169595	+	22.3054	28.723	24.4158	58.7057	73.5728	50.0673
ENSG00000271643.2	PDCD6IP-DT	74.2195	1.01501	0.265199	3.82734	0.000129537	0.000881525	chr3:33793644-33798539	-	52.7218	47.8717	46.8784	122.304	102.443	73.0983
ENSG00000159387.8	IRX6	11.6214	-3.20863	0.838695	-3.82574	0.000130377	0.000886421	chr16:55324203-55330756	+	24.3331	5.31907	33.2055	2.93529	0.931301	3.00404
ENSG00000196361.10	ELAVL3	10.9696	-2.89602	0.757227	-3.82451	0.000131034	0.000890612	chr19:11451326-11481046	-	22.3054	18.0848	17.5794	0.978429	1.8626	5.00673
ENSG00000233725.7	NRAD1	9.13939	3.62459	0.948452	3.82159	0.000132595	0.000900941	chr13:43908669-44030461	+	1.01388	3.19144	0	19.5686	13.0382	18.0242
ENSG00000164266.11	SPINK1	8.36596	-4.62901	1.2114	-3.82119	0.000132809	0.000901755	chr5:147824572-147831671	-	20.2776	19.1487	8.7897	0.978429	0	1.00135
ENSG00000278923.2	RP11-805F19.5	4.54921	5.60191	1.46623	3.82062	0.000133116	0.000903094	chr18:15056845-15066598	-	0	0	0	10.7627	6.51911	10.0135
ENSG00000216307.2	RP3-400B16.2	4.51398	5.59264	1.46394	3.82026	0.000133313	0.000903875	chr6:4189116-4189806	+	0	0	0	7.82743	10.2443	9.01211
ENSG00000168209.6	DDIT4	4892.21	-1.6525	0.432632	-3.81964	0.000133646	0.000905579	chr10:72273919-72276036	+	5838.94	10105.2	6325.65	1531.24	3437.43	2114.84
ENSG00000166924.9	NYAP1	45.6523	-1.21364	0.317847	-3.81831	0.000134371	0.00090993	chr7:100483927-100494802	+	70.9716	62.7651	57.6214	22.5039	27.0077	33.0444
ENSG00000215604.3	ZNF962P	4.78132	5.67813	1.4883	3.81517	0.000136087	0.000920421	chr13:18467172-18485448	-	0	0	0	3.91372	16.7634	8.01077
ENSG00000123119.12	NECAB1	60.1147	1.1147	0.292777	3.80734	0.000140472	0.000946022	chr8:90791741-90959393	+	47.6524	35.1059	31.2523	97.8429	84.7484	64.0861
ENSG00000272931.1	LRRC8D-DT	15.4711	-2.21607	0.582325	-3.80556	0.000141484	0.000952546	chr1:89820174-89820868	-	27.3748	26.5954	22.4626	2.93529	7.45041	6.00808
ENSG00000227705.1	RP11-15M15.2	9.60836	-3.4541	0.910048	-3.79551	0.00014734	0.000988959	chr20:53196229-53208705	-	7.09716	22.3401	23.4392	0.978429	2.7939	1.00135
ENSG00000258733.6	LINC02328	23.262	1.72254	0.454996	3.78584	0.000153191	0.00102356	chr14:85911438-86161500	+	11.1527	9.57433	11.7196	34.245	42.8399	30.0404
ENSG00000054356.14	PTPRN	40.638	-1.46949	0.38857	-3.78179	0.000155707	0.00103786	chr2:219289623-219309648	-	91.2492	36.1697	51.7616	20.547	26.0764	18.0242
ENSG00000251141.6	MRPS30-DT	47.8772	1.20767	0.319511	3.77975	0.000156988	0.00104545	chr5:44742420-44808777	-	22.3054	37.2335	27.3457	72.4037	55.8781	72.0969
ENSG00000269113.4	TRABD2B	16.1351	2.18906	0.579855	3.77518	0.000159891	0.00106254	chr1:47760528-47997385	-	4.05552	9.57433	3.90653	28.3744	28.8703	22.0296
ENSG00000143217.9	NECTIN4	12.3286	2.6678	0.707692	3.76972	0.000163432	0.00108346	chr1:161070998-161089558	-	2.02776	1.06381	6.83643	21.5254	20.4886	22.0296
ENSG00000229788.1	LINC00388	4.37043	5.54498	1.47228	3.76624	0.000165721	0.00109666	chr13:18610298-18611675	-	0	0	0	7.82743	8.38171	10.0135
ENSG00000187824.9	TMEM220	24.7017	-1.76503	0.469269	-3.76123	0.000169082	0.00111589	chr17:10699015-10730023	-	35.4858	36.1697	42.9719	14.6764	14.9008	4.00538
ENSG00000235961.6	PNMA6A	37.2833	-1.38428	0.369087	-3.75055	0.000176445	0.00115997	chrX:153072454-153075019	+	52.7218	42.5526	66.4111	13.698	23.2825	25.0337
ENSG00000256085.1	RP11-337L12.1	4.35472	5.54068	1.47952	3.74492	0.00018045	0.00118348	chr12:129521303-129522763	-	0	0	0	5.87057	10.2443	10.0135
ENSG00000102554.14	KLF5	47.8336	-1.22953	0.328436	-3.7436	0.000181404	0.00118904	chr13:73054976-73077541	+	77.0549	49.9993	74.2241	28.3744	36.3207	21.0283
ENSG00000279289.1	RP3-331H24.6	83.2271	-1.0352	0.276822	-3.73958	0.000184326	0.00120676	chr6:71386852-71390829	-	91.2492	160.636	83.9905	59.6842	57.7407	46.0619
ENSG00000157087.20	ATP2B2	60.4831	1.01666	0.271969	3.73813	0.000185391	0.00121301	chr3:10324023-10708007	-	42.583	40.425	37.1121	75.339	90.3362	77.1036
ENSG00000285646.2	RP5-934G17.7	57.2634	1.11268	0.297711	3.73744	0.000185903	0.00121528	chr1:11907940-11914298	+	43.5969	29.7868	35.1588	98.8213	66.1224	70.0942
ENSG00000139292.13	LGR5	8.26122	-3.55758	0.952383	-3.73545	0.000187379	0.0012242	chr12:71439798-71586310	+	16.2221	13.8296	15.6261	1.95686	0.931301	1.00135
ENSG00000171345.13	KRT19	7.84536	-4.54257	1.21755	-3.7309	0.000190798	0.00124363	chr17:41523617-41528308	-	12.1666	21.2763	11.7196	0.978429	0.931301	0
ENSG00000137460.10	FHDC1	60.8252	1.05521	0.28335	3.72403	0.000196065	0.00127416	chr4:152936323-152979671	+	34.4719	36.1697	47.855	68.49	96.8553	81.109
ENSG00000247213.7	LINC01498	6.39261	-5.16521	1.38709	-3.72378	0.000196259	0.00127505	chr12:108434130-108515023	-	14.1943	8.51052	14.6495	0	0	1.00135
ENSG00000261553.5	RP11-29G8.3	12.6175	2.53744	0.682076	3.72017	0.000199088	0.00129115	chr13:75549773-75807120	+	2.02776	3.19144	5.8598	24.4607	25.1451	15.0202
ENSG00000116661.11	FBXO2	31.1238	-1.53542	0.412923	-3.71842	0.000200472	0.0012986	chr1:11637018-11655785	-	43.5969	52.1269	42.9719	19.5686	7.45041	21.0283
ENSG00000242110.8	AMACR	28.9449	1.48115	0.398437	3.7174	0.000201282	0.00130308	chr5:33986165-34008104	-	18.2498	14.8934	12.6962	42.0724	44.7025	41.0552
ENSG00000133106.15	EPSTI1	28.5453	-1.54635	0.416596	-3.71187	0.000205733	0.00132955	chr13:42886388-42992271	-	29.4025	54.2545	43.9485	14.6764	13.9695	15.0202
ENSG00000228522.2	RP11-236F9.2	8.82102	3.58933	0.967766	3.70888	0.000208177	0.00134338	chr9:63330326-63343660	+	2.02776	1.06381	0.976633	16.6333	24.2138	8.01077
ENSG00000261054.1	RP11-6O2.4	25.8001	-1.5848	0.427317	-3.70873	0.0002083	0.00134341	chr15:99128832-99131806	-	36.4997	42.5526	37.1121	15.6549	13.9695	9.01211
ENSG00000286071.1	DISC2	16.6901	2.06046	0.55669	3.70127	0.000214525	0.00137871	chr1:231767464-231847706	-	8.11104	6.38289	4.88317	22.5039	24.2138	34.0458
ENSG00000236671.9	PRKG1-AS1	34.9301	-1.46803	0.397284	-3.69515	0.000219757	0.00140807	chr10:52230398-52314507	-	57.7912	38.2973	57.6214	18.5901	10.2443	27.0363
ENSG00000234390.4	USP27X-DT	14.6401	-2.22187	0.601544	-3.69362	0.000221084	0.0014155	chrX:49876724-49879241	-	20.2776	27.6592	24.4158	7.82743	4.65651	3.00404
ENSG00000181649.8	PHLDA2	61.5481	1.19801	0.325015	3.686	0.000227805	0.00145242	chr11:2928273-2929420	-	56.7773	32.9783	22.4626	64.5763	103.374	89.1198
ENSG00000230990.2	RP4-734C18.1	15.2974	2.10942	0.57237	3.68542	0.000228329	0.00145514	chr20:11234170-11301525	-	6.08328	5.31907	5.8598	23.4823	27.0077	24.0323
ENSG00000226930.1	GTF2IP2	4.18423	5.48367	1.48831	3.68449	0.000229159	0.00145958	chr21:13443373-13489176	-	0	0	0	9.78429	9.31301	6.00808
ENSG00000159625.15	DRC7	24.5628	1.74457	0.473726	3.68264	0.000230827	0.00146893	chr16:57694793-57731805	+	7.09716	19.1487	7.81307	29.3529	41.9086	42.0565
ENSG00000236682.2	MAP3K2-DT	41.0632	1.24701	0.339049	3.67796	0.000235108	0.00149317	chr2:127388184-127400580	+	22.3054	22.3401	28.3224	69.4684	55.8781	48.0646
ENSG00000197921.6	HES5	18.7247	1.93513	0.526355	3.67647	0.000236486	0.00150019	chr1:2528745-2530263	-	11.1527	4.25526	7.81307	35.2234	28.8703	25.0337
ENSG00000233997.5	LINC01425	4.33563	-5.60676	1.52782	-3.66977	0.000242768	0.00153695	chr21:21746973-21797415	+	12.1666	2.12763	11.7196	0	0	0
ENSG00000111799.22	COL12A1	26.4523	-1.52998	0.417014	-3.66889	0.000243606	0.00154181	chr6:75084326-75206267	-	35.4858	39.3611	42.9719	13.698	11.1756	16.0215
ENSG00000233670.7	PIRT	9.64034	-3.47438	0.950213	-3.65642	0.000255762	0.00160952	chr17:10822470-10838087	-	27.3748	17.021	8.7897	0	4.65651	0
ENSG00000115112.8	TFCP2L1	4.11391	-5.52442	1.51095	-3.65625	0.000255934	0.00161015	chr2:121216587-121285202	-	10.1388	10.6381	3.90653	0	0	0
ENSG00000183346.9	CABCOCO1	23.1085	-1.62959	0.445989	-3.65388	0.000258303	0.00162459	chr10:61662929-61766766	+	32.4442	37.2335	35.1588	10.7627	13.0382	10.0135
ENSG00000202515.1	VTRNA1-3	4.03928	-5.5026	1.50886	-3.64686	0.000265468	0.00166775	chr5:140726158-140726246	+	5.0694	7.4467	11.7196	0	0	0
ENSG00000267121.6	FMNL1-DT	42.7745	-1.23269	0.338375	-3.64297	0.000269505	0.00168783	chr17:45190931-45222222	-	52.7218	63.8289	63.4812	16.6333	27.939	32.0431
ENSG00000175874.10	CREG2	45.4907	-1.35028	0.370691	-3.6426	0.000269899	0.00168981	chr2:101345550-101387503	-	100.374	45.744	49.8083	29.3529	18.626	29.039
ENSG00000120594.17	PLXDC2	4.32028	-5.59354	1.53583	-3.64203	0.000270494	0.00169258	chr10:19816239-20289856	+	10.1388	13.8296	1.95327	0	0	0
ENSG00000171587.15	DSCAM	7.46955	-4.46291	1.22548	-3.64177	0.000270765	0.0016938	chr21:40010999-40847158	-	12.1666	17.021	13.6729	1.95686	0	0
ENSG00000287087.1	CTD-2081C10.8	4.03665	5.43101	1.49291	3.63786	0.000274914	0.00171732	chr5:53897464-53899370	+	0	0	0	7.82743	8.38171	8.01077
ENSG00000227268.5	KLLN	47.5327	-1.16082	0.319188	-3.63679	0.000276062	0.001724	chr10:87859158-87863533	-	51.7079	82.9775	62.5045	28.3744	32.5955	27.0363
ENSG00000248211.1	TRPC7-AS1	4.03283	5.42989	1.49425	3.63385	0.000279223	0.00174079	chr5:136214048-136222159	+	0	0	0	8.80586	8.38171	7.00942
ENSG00000214814.7	FER1L6	7.68883	-3.88974	1.07102	-3.6318	0.000281451	0.00175319	chr8:123851987-124120061	+	10.1388	22.3401	10.743	0.978429	0.931301	1.00135
ENSG00000259291.2	ZNF710-AS1	47.0773	-1.16702	0.321608	-3.6287	0.000284855	0.0017709	chr15:90074512-90082207	-	67.93	54.2545	73.2475	36.2019	29.8016	21.0283
ENSG00000187867.10	PALM3	25.237	1.60417	0.442171	3.62793	0.000285701	0.00177566	chr19:14053363-14062076	-	16.2221	8.51052	12.6962	31.3097	45.6338	37.0498
ENSG00000249835.2	VCAN-AS1	9.15248	-3.07509	0.849092	-3.62163	0.000292758	0.00181747	chr5:83531352-83581320	-	22.3054	17.021	9.76633	1.95686	1.8626	2.00269
ENSG00000268521.1	VN1R83P	35.0771	1.29389	0.357319	3.6211	0.000293355	0.00182015	chr19:21289554-21289998	-	18.2498	20.2125	22.4626	52.8352	45.6338	51.0686
ENSG00000184731.6	FAM110C	24.3232	-1.72248	0.475758	-3.6205	0.000294036	0.00182233	chr2:38814-46870	-	55.7634	30.8506	25.3925	14.6764	10.2443	9.01211
ENSG00000100024.15	UPB1	14.0579	-2.37662	0.656754	-3.61874	0.000296043	0.00183374	chr22:24494107-24528390	+	31.4303	26.5954	12.6962	7.82743	2.7939	3.00404
ENSG00000253857.2	RP11-386G21.2	10.2828	-2.79983	0.773794	-3.61831	0.000296531	0.00183624	chr8:55161446-55164727	+	10.1388	22.3401	21.4859	2.93529	2.7939	2.00269
ENSG00000164136.17	IL15	8.27779	3.9451	1.09171	3.61367	0.000301889	0.00186472	chr4:141636583-141733987	+	1.01388	0	1.95327	28.3744	9.31301	9.01211
ENSG00000246763.7	RGMB-AS1	8.24992	3.49116	0.966169	3.6134	0.000302203	0.00186614	chr5:98769618-98773469	-	0	1.06381	2.9299	15.6549	15.8321	14.0188
ENSG00000228162.1	AC097713.3	5.9695	-5.06206	1.40136	-3.61225	0.000303553	0.0018729	chr2:234438328-234462127	+	10.1388	15.9572	8.7897	0	0.931301	0
ENSG00000145708.11	CRHBP	3.90755	-5.4524	1.51039	-3.60993	0.000306282	0.00188815	chr5:76953045-76981158	+	10.1388	7.4467	5.8598	0	0	0
ENSG00000286642.1	RP11-644A7.3	11.1301	-2.71883	0.753583	-3.60787	0.000308719	0.00190052	chr18:70497923-70554100	-	15.2082	20.2125	22.4626	4.89214	0	4.00538
ENSG00000279587.1	RP1-278D1.2	43.2697	-1.24027	0.343802	-3.60752	0.000309134	0.00190255	chrX:117894632-117895683	-	44.6107	61.7013	76.1774	22.5039	32.5955	22.0296
ENSG00000088726.16	TMEM40	15.8262	-2.05469	0.569614	-3.60716	0.000309566	0.00190467	chr3:12733528-12769457	-	21.2915	30.8506	24.4158	8.80586	5.58781	4.00538
ENSG00000159713.11	TPPP3	31.8733	-1.41279	0.391706	-3.60677	0.000310028	0.00190699	chr16:67389809-67393518	-	44.6107	57.446	37.1121	13.698	22.3512	16.0215
ENSG00000112414.15	ADGRG6	7.73849	4.46146	1.23707	3.60647	0.000310391	0.00190869	chr6:142301854-142446266	+	0	0	1.95327	7.82743	18.626	18.0242
ENSG00000211448.13	DIO2	37.423	1.29337	0.358796	3.60475	0.000312457	0.00192033	chr14:80197526-80387757	-	25.347	19.1487	20.5093	65.5547	41.9086	52.07
ENSG00000114547.10	ROPN1B	18.3453	1.90062	0.52733	3.60423	0.000313083	0.00192351	chr3:125969160-125983454	+	10.1388	4.25526	8.7897	27.396	34.4581	25.0337
ENSG00000249599.2	BMPR1B-DT	8.16209	-3.53016	0.980294	-3.60112	0.000316847	0.00194514	chr4:94743668-94757681	-	18.2498	17.021	9.76633	0	0.931301	3.00404
ENSG00000147145.13	LPAR4	26.0939	-1.54665	0.430826	-3.58997	0.000330713	0.00202576	chrX:78747709-78758714	+	40.5552	32.9783	42.9719	15.6549	8.38171	16.0215
ENSG00000119508.18	NR4A3	19.8417	1.89694	0.528798	3.58728	0.00033415	0.0020451	chr9:99821855-99866891	+	8.11104	4.25526	12.6962	20.547	35.3894	38.0511
ENSG00000169436.17	COL22A1	7.51619	-4.48627	1.2512	-3.58557	0.00033634	0.0020568	chr8:138588235-138914041	-	8.11104	23.4039	11.7196	0	1.8626	0
ENSG00000125046.15	SSUH2	18.2116	1.95743	0.546047	3.58474	0.000337419	0.00206283	chr3:8619400-8745040	-	4.05552	8.51052	9.76633	27.396	20.4886	39.0525
ENSG00000226496.3	LINC00323	10.9442	-2.88977	0.806757	-3.58197	0.000341017	0.00208194	chr21:41141493-41148198	-	29.4025	12.7658	15.6261	0	1.8626	6.00808
ENSG00000236718.4	RBMY2QP	3.94296	-5.4631	1.52724	-3.5771	0.000347432	0.00211759	chrY:9954532-10035299	-	4.05552	12.7658	6.83643	0	0	0
ENSG00000184809.13	B3GALT5-AS1	25.6181	-1.61489	0.451696	-3.57518	0.000349992	0.00213025	chr21:39597147-39612910	-	32.4442	27.6592	55.6681	11.7411	11.1756	15.0202
ENSG00000280108.2	RP1-127M18.1	3.88525	5.37518	1.50553	3.5703	0.000356579	0.00216511	chr21:13305152-13314944	+	0	0	0	6.849	7.45041	9.01211
ENSG00000100453.13	GZMB	7.31879	4.3619	1.22225	3.56874	0.000358698	0.00217485	chr14:24630954-24634267	-	0	1.06381	0.976633	11.7411	12.1069	18.0242
ENSG00000249669.10	CARMN	15.6518	-2.12865	0.597893	-3.56025	0.000370496	0.00224023	chr5:149406689-149432835	+	22.3054	15.9572	38.0887	4.89214	4.65651	8.01077
ENSG00000204655.12	MOG	19.6267	-1.74009	0.488964	-3.55873	0.000372657	0.00225083	chr6:29657002-29672372	+	30.4164	31.9144	28.3224	6.849	10.2443	10.0135
ENSG00000253671.3	RP11-806O11.1	4.04972	-5.50549	1.54798	-3.55657	0.000375726	0.00226565	chr8:17808361-17822183	+	2.02776	9.57433	12.6962	0	0	0
ENSG00000224593.1	RP11-30B1.1	11.7241	-2.47716	0.696627	-3.55593	0.000376641	0.00226992	chr7:3337889-3338601	+	17.236	28.723	13.6729	3.91372	2.7939	4.00538
ENSG00000232034.1	AC092168.2	33.5756	-1.33086	0.374586	-3.55289	0.000381017	0.00229254	chr2:100822661-100847220	+	37.5136	48.9355	57.6214	18.5901	16.7634	22.0296
ENSG00000183206.18	POTEC	12.6243	-2.63798	0.744046	-3.54545	0.000391937	0.00234992	chr18:14507339-14543600	-	23.3192	12.7658	29.299	0.978429	8.38171	1.00135
ENSG00000234817.2	ECI2-DT	43.3272	1.24375	0.350833	3.54513	0.000392416	0.00235215	chr6:4136072-4157385	+	14.1943	28.723	34.1822	62.6194	52.1529	68.0915
ENSG00000224309.7	ANKRD30BP2	3.85427	5.36568	1.51512	3.54142	0.000397981	0.00238228	chr21:13038160-13067033	+	0	0	0	8.80586	9.31301	5.00673
ENSG00000110076.19	NRXN2	10.5758	-2.63942	0.746333	-3.53651	0.000405449	0.00242434	chr11:64606174-64723197	-	15.2082	15.9572	23.4392	3.91372	0.931301	4.00538
ENSG00000213080.3	RP11-312J18.5	9.82722	-2.72084	0.769747	-3.53473	0.000408197	0.0024388	chr1:160894980-160896076	+	17.236	21.2763	12.6962	1.95686	2.7939	3.00404
ENSG00000144339.12	TMEFF2	3.90332	-5.45122	1.54254	-3.53393	0.000409431	0.00244485	chr2:191949043-192194933	-	14.1943	5.31907	3.90653	0	0	0
ENSG00000251574.8	RP11-6N13.1	5.944	4.98747	1.41333	3.52888	0.000417329	0.00248663	chr5:104383298-105392970	-	1.01388	0	0	5.87057	16.7634	12.0162
ENSG00000150471.17	ADGRL3	10.6927	-2.65991	0.75416	-3.52698	0.000420329	0.00250241	chr4:61200326-62078335	+	24.3331	21.2763	9.76633	3.91372	1.8626	3.00404
ENSG00000226237.2	GAS1RR	11.8764	-2.36224	0.670046	-3.52549	0.000422695	0.00251453	chr9:86948666-87002033	+	22.3054	14.8934	22.4626	2.93529	4.65651	4.00538
ENSG00000176435.7	CLEC14A	3.71572	-5.38134	1.52796	-3.5219	0.000428458	0.00254607	chr14:38254000-38256093	-	10.1388	5.31907	6.83643	0	0	0
ENSG00000204950.4	LRRC10B	10.4164	-2.82218	0.80151	-3.52108	0.000429789	0.00255191	chr11:61508749-61511018	+	24.3331	13.8296	16.6028	5.87057	1.8626	0
ENSG00000286334.1	RP11-419D4.1	3.69709	-5.37538	1.5283	-3.51722	0.000436087	0.00258653	chr13:97278768-97295400	-	7.09716	5.31907	9.76633	0	0	0
ENSG00000111186.13	WNT5B	21.96	-1.63875	0.466154	-3.51546	0.000438995	0.00260028	chr12:1529891-1647212	+	35.4858	32.9783	31.2523	6.849	11.1756	14.0188
ENSG00000133985.3	TTC9	32.5118	1.35472	0.385589	3.51337	0.00044246	0.00261859	chr14:70641916-70675366	+	16.2221	17.021	21.4859	53.8136	34.4581	52.07
ENSG00000277749.1	RP11-60L3.6	4.14086	-5.533	1.57543	-3.51207	0.000444638	0.00262807	chr15:74311516-74319688	-	12.1666	11.702	0.976633	0	0	0
ENSG00000277586.4	NEFL	13.3937	-2.17739	0.620295	-3.51024	0.000447696	0.00264473	chr8:24950955-24956721	-	22.3054	18.0848	25.3925	6.849	3.7252	4.00538
ENSG00000196549.13	MME	21.0829	1.71229	0.48821	3.50728	0.000452713	0.00267222	chr3:155024124-155183704	+	5.0694	13.8296	10.743	29.3529	34.4581	33.0444
ENSG00000171643.14	S100Z	6.78776	-4.32568	1.23515	-3.50216	0.000461506	0.00272048	chr5:76850001-76921650	+	13.1804	14.8934	10.743	0.978429	0.931301	0
ENSG00000152503.10	TRIM36	35.5356	1.25374	0.358149	3.50061	0.000464198	0.00273489	chr5:115124762-115180546	-	16.2221	22.3401	24.4158	53.8136	49.359	47.0633
ENSG00000153391.16	INO80C	49.2494	1.03887	0.297364	3.4936	0.000476563	0.00280251	chr18:35452230-35497979	-	33.4581	34.0421	29.299	65.5547	67.0537	66.0888
ENSG00000226886.1	AC093787.1	3.73025	5.31602	1.52275	3.49106	0.000481104	0.00282846	chr2:132037787-132037993	-	0	0	0	9.78429	5.58781	7.00942
ENSG00000130822.16	PNCK	46.137	-1.30758	0.374729	-3.4894	0.000484113	0.00284387	chrX:153669733-153689010	-	81.1104	60.6374	55.6681	14.6764	44.7025	20.0269
ENSG00000105499.14	PLA2G4C	44.9836	1.08572	0.311312	3.48757	0.000487426	0.00286181	chr19:48047843-48110817	-	28.3887	28.723	29.299	60.6626	57.7407	65.0875
ENSG00000224389.9	C4B	33.0146	-1.49613	0.429001	-3.48747	0.000487605	0.0028621	chr6:32014795-32035418	+	34.4719	42.5526	69.341	16.6333	26.0764	9.01211
ENSG00000286246.1	RP11-337L12.2	3.74957	5.32218	1.52624	3.48712	0.000488255	0.00286516	chr12:129622929-129625366	+	0	0	0	7.82743	4.65651	10.0135
ENSG00000199218.1	RN7SKP184	7.82493	-3.92004	1.12523	-3.48376	0.000494416	0.00289746	chr20:53097652-53097984	+	21.2915	3.19144	19.5327	0	0.931301	2.00269
ENSG00000287038.1	RP11-373A6.2	11.8757	-2.3705	0.680506	-3.48344	0.000495011	0.00290017	chr9:29214322-29229229	+	18.2498	18.0848	23.4392	1.95686	6.51911	3.00404
ENSG00000134716.11	CYP2J2	5.67089	4.91678	1.41221	3.48163	0.000498366	0.00291442	chr1:59893308-59926773	-	0	0	0.976633	15.6549	8.38171	9.01211
ENSG00000236548.2	RNF217-AS1	19.5602	-1.85869	0.534148	-3.47973	0.000501914	0.00293361	chr6:124644434-124963165	-	38.5275	19.1487	34.1822	10.7627	3.7252	11.0148
ENSG00000258777.1	HIF1A-AS1	12.4192	2.34091	0.672782	3.47945	0.000502445	0.00293552	chr14:61681041-61695823	-	3.04164	6.38289	2.9299	28.3744	16.7634	17.0229
ENSG00000104369.5	JPH1	42.8991	1.1378	0.327043	3.47905	0.000503196	0.00293799	chr8:74234700-74321540	-	31.4303	25.5316	23.4392	56.7489	52.1529	68.0915
ENSG00000019991.18	HGF	3.57171	-5.32239	1.53386	-3.46992	0.000520605	0.00302842	chr7:81699010-81770438	-	6.08328	8.51052	6.83643	0	0	0
ENSG00000125740.14	FOSB	27.2785	1.49353	0.430723	3.46749	0.000525334	0.00305191	chr19:45467995-45475179	+	12.1666	19.1487	11.7196	46.9646	45.6338	28.0377
ENSG00000251129.2	LINC02506	38.737	1.17418	0.338646	3.46729	0.000525733	0.00305343	chr4:31997376-32228543	+	22.3054	27.6592	21.4859	56.7489	52.1529	52.07
ENSG00000125730.17	C3	28.8858	-1.39991	0.403775	-3.46705	0.000526208	0.00305538	chr19:6677704-6730562	-	44.6107	47.8717	33.2055	19.5686	13.0382	15.0202
ENSG00000138100.14	TRIM54	10.024	2.6882	0.776199	3.46329	0.000533622	0.00309518	chr2:27282429-27307439	+	1.01388	2.12763	4.88317	17.6117	20.4886	14.0188
ENSG00000128606.13	LRRC17	32.5991	-1.271	0.367416	-3.4593	0.000541591	0.00313645	chr7:102913000-102945111	+	47.6524	44.6802	45.9018	19.5686	16.7634	21.0283
ENSG00000253660.1	CTC-353G13.1	23.902	-1.54026	0.44578	-3.45521	0.000549868	0.00318105	chr5:167937717-167953469	-	30.4164	38.2973	38.0887	13.698	14.9008	8.01077
ENSG00000149506.11	ZP1	33.5065	-1.40142	0.406521	-3.44735	0.00056611	0.0032656	chr11:60867562-60875693	+	69.9577	44.6802	31.2523	22.5039	18.626	14.0188
ENSG00000113739.11	STC2	434.376	-1.08251	0.314325	-3.44391	0.000573368	0.00330229	chr5:173314723-173328447	-	795.896	377.654	596.723	271.025	303.604	261.351
ENSG00000072694.21	FCGR2B	6.92018	4.29365	1.24708	3.44297	0.000575367	0.00331121	chr1:161663147-161678654	+	0	0	1.95327	15.6549	14.9008	9.01211
ENSG00000185532.20	PRKG1	7.03269	-3.76528	1.0958	-3.4361	0.000590145	0.00339007	chr10:50990888-52298423	+	17.236	7.4467	14.6495	0	1.8626	1.00135
ENSG00000129682.16	FGF13	20.3835	-1.74307	0.508234	-3.42966	0.000604335	0.00346527	chrX:138614727-139222777	-	30.4164	26.5954	37.1121	3.91372	10.2443	14.0188
ENSG00000236384.7	LINC00479	3.66394	-5.36432	1.56424	-3.42935	0.000605019	0.00346829	chr21:41711520-41715775	-	4.05552	4.25526	13.6729	0	0	0
ENSG00000231826.6	LINC01819	5.42293	-4.92152	1.43691	-3.42508	0.000614615	0.003516	chr2:43027823-43040662	-	17.236	8.51052	5.8598	0	0.931301	0
ENSG00000237732.9	CT75	7.98245	-3.51519	1.027	-3.42279	0.000619829	0.00354216	chr2:222318275-222352989	+	5.0694	23.4039	15.6261	0	2.7939	1.00135
ENSG00000265417.1	RP11-288C17.1	7.14299	-3.78856	1.10772	-3.42013	0.000625917	0.00357325	chr18:1362445-1363873	-	19.2637	14.8934	5.8598	0.978429	1.8626	0
ENSG00000174567.8	GOLT1A	35.2499	-1.24369	0.363755	-3.41902	0.000628463	0.003585	chr1:204198163-204213988	-	47.6524	41.4888	59.5746	17.6117	25.1451	20.0269
ENSG00000185885.17	IFITM1	54.1732	1.05311	0.308095	3.41813	0.000630519	0.00359434	chr11:310041-315272	+	26.3609	39.3611	40.042	55.7704	89.4049	74.0996
ENSG00000230707.2	RP11-364B14.3	15.2314	-1.97724	0.579558	-3.41163	0.000645754	0.00367414	chrX:140091415-140092911	+	24.3331	19.1487	29.299	5.87057	3.7252	9.01211
ENSG00000224020.1	MIR181A2HG	25.3539	1.46256	0.429191	3.40771	0.000655096	0.00372058	chr9:124658467-124698631	+	12.1666	10.6381	17.5794	38.1587	33.5268	40.0538
ENSG00000137491.15	SLCO2B1	8.25716	3.4643	1.0178	3.40373	0.000664722	0.0037704	chr11:75100563-75206549	+	1.01388	3.19144	0	4.89214	21.4199	19.0256
ENSG00000142494.13	SLC47A1	41.2196	-1.16396	0.342068	-3.40272	0.000667177	0.00378335	chr17:19495385-19579034	+	55.7634	47.8717	67.3877	30.3313	27.939	18.0242
ENSG00000169562.13	GJB1	7.50578	3.33034	0.978874	3.40222	0.000668414	0.0037894	chrX:71212811-71225516	+	2.02776	1.06381	0.976633	16.6333	9.31301	15.0202
ENSG00000047936.11	ROS1	3.63815	-5.34474	1.5741	-3.39543	0.000685214	0.00387568	chr6:117287353-117425942	-	5.0694	13.8296	2.9299	0	0	0
ENSG00000253706.5	RP11-758M4.4	6.87552	-3.71902	1.09717	-3.38965	0.00069982	0.00395121	chr8:74798784-74866939	-	9.12492	10.6381	18.556	0	0.931301	2.00269
ENSG00000171724.3	VAT1L	37.8344	-1.25739	0.371188	-3.38747	0.000705402	0.00397885	chr16:77788564-77980107	+	53.7357	71.2756	35.1588	18.5901	24.2138	24.0323
ENSG00000259156.7	CHEK2P2	10.3233	2.52065	0.744712	3.38473	0.000712474	0.00400997	chr15:20282744-20291586	+	2.02776	4.25526	2.9299	18.5901	12.1069	22.0296
ENSG00000228184.1	SNX19P1	6.80471	3.63011	1.07384	3.38048	0.000723584	0.00406356	chr21:13525599-13528579	+	1.01388	1.06381	0.976633	12.7196	13.0382	12.0162
ENSG00000224087.1	POTEF-AS1	3.3882	-5.24734	1.55279	-3.37929	0.000726726	0.00407913	chr2:130107684-130109741	+	5.0694	7.4467	7.81307	0	0	0
ENSG00000237013.1	LINC01812	3.57907	5.25568	1.55567	3.37839	0.000729104	0.00409143	chr2:67796054-67825562	-	0	0	0	11.7411	3.7252	6.00808
ENSG00000204362.6	LINC02783	6.68898	-4.29275	1.27182	-3.37528	0.000737415	0.00413387	chr1:17189783-17197617	+	8.11104	21.2763	8.7897	1.95686	0	0
ENSG00000232624.8	LINC01517	5.3163	-4.88886	1.44887	-3.37425	0.000740168	0.00414719	chr10:28743506-28941910	+	12.1666	14.8934	3.90653	0	0.931301	0
ENSG00000154451.14	GBP5	6.4618	-4.24714	1.25892	-3.37365	0.000741798	0.00415527	chr1:89258950-89272804	-	17.236	12.7658	6.83643	0	0.931301	1.00135
ENSG00000271133.5	ITGB8-AS1	19.3084	1.80812	0.536139	3.37249	0.000744923	0.00417172	chr7:20328299-20331747	-	8.11104	14.8934	2.9299	29.3529	33.5268	27.0363
ENSG00000111181.13	SLC6A12	10.3288	2.52226	0.748171	3.37124	0.000748313	0.00418752	chr12:190077-214570	-	4.05552	3.19144	1.95327	16.6333	12.1069	24.0323
ENSG00000179083.7	FAM133A	17.2393	1.85548	0.550434	3.37094	0.000749118	0.00419044	chrX:93674013-93712274	+	7.09716	8.51052	6.83643	16.6333	36.3207	28.0377
ENSG00000145832.15	SLC25A48	5.06772	-4.81877	1.43053	-3.36853	0.000755712	0.0042225	chr5:135579202-135889770	+	8.11104	9.57433	11.7196	0	0	1.00135
ENSG00000164304.16	CAGE1	36.7058	-1.1717	0.348202	-3.36502	0.000765387	0.00427115	chr6:7326656-7389742	-	47.6524	53.1907	51.7616	24.4607	25.1451	18.0242
ENSG00000241218.1	CSP2	12.7038	2.12744	0.633657	3.3574	0.000786782	0.00437837	chr3:107327830-107329197	-	6.08328	3.19144	4.88317	23.4823	19.5573	19.0256
ENSG00000229824.1	RPL12P34	3.39626	5.18138	1.54572	3.35208	0.000802069	0.00445334	chr13:68654572-68655050	+	0	0	0	6.849	6.51911	7.00942
ENSG00000215218.4	UBE2QL1	32.7874	1.37507	0.410519	3.34959	0.000809322	0.00449022	chr5:6448859-6496723	+	18.2498	14.8934	21.4859	70.4469	32.5955	39.0525
ENSG00000259564.2	RP11-16B9.1	15.9359	1.88576	0.565442	3.33502	0.00085294	0.00470973	chr15:61834682-61935738	+	5.0694	8.51052	6.83643	28.3744	29.8016	17.0229
ENSG00000135324.6	MRAP2	15.7171	-1.86578	0.560119	-3.33104	0.00086522	0.004768	chr6:84033772-84090881	+	31.4303	19.1487	23.4392	7.82743	7.45041	5.00673
ENSG00000119865.9	CNRIP1	14.7487	1.92909	0.58041	3.32366	0.000888446	0.00487894	chr2:68284171-68320051	-	5.0694	8.51052	4.88317	22.5039	20.4886	27.0363
ENSG00000128564.7	VGF	34.5358	-1.26459	0.380638	-3.32228	0.00089286	0.00489959	chr7:101162509-101165569	-	56.7773	44.6802	44.9251	27.396	21.4199	12.0162
ENSG00000170703.16	TTLL6	6.66095	3.5959	1.08236	3.32227	0.000892873	0.00489959	chr17:48762234-48817229	-	1.01388	1.06381	0.976633	9.78429	12.1069	15.0202
ENSG00000170122.6	FOXD4	40.7357	-1.27001	0.382999	-3.31596	0.000913276	0.00500037	chr9:116231-118417	-	80.0965	59.5736	33.2055	16.6333	28.8703	26.035
ENSG00000244675.2	AC108676.1	25.5498	1.42537	0.429892	3.31565	0.000914312	0.00500386	chr3:194496317-194501503	-	16.2221	10.6381	14.6495	45.0077	30.7329	36.0485
ENSG00000267505.1	CTC-296K1.3	6.7749	3.63736	1.09878	3.31036	0.000931765	0.00509024	chr17:44793199-44794474	+	1.01388	0	1.95327	16.6333	13.0382	8.01077
ENSG00000172572.7	PDE3A	57.2647	1.0715	0.3241	3.30608	0.000946096	0.00515959	chr12:20368537-20688583	+	36.4997	20.2125	53.7148	66.5332	74.5041	92.1238
ENSG00000135378.4	PRRG4	23.7721	1.76217	0.533553	3.30272	0.000957531	0.0052141	chr11:32829927-32858120	+	23.3192	4.25526	4.88317	32.2882	42.8399	35.0471
ENSG00000285636.2	RP11-384L19.1	21.151	-1.5741	0.476702	-3.30206	0.000959783	0.00522391	chr1:162146709-162175243	-	28.3887	39.3611	27.3457	7.82743	13.9695	10.0135
ENSG00000274209.6	ANTXRL	22.4439	-1.95855	0.593271	-3.30126	0.000962504	0.00523614	chr10:46286345-46330207	+	33.4581	43.6164	30.2756	4.89214	21.4199	1.00135
ENSG00000203855.7	HSD3BP4	3.42767	5.19256	1.57537	3.29609	0.000980419	0.0053231	chr1:119564066-119572067	+	0	0	0	10.7627	2.7939	7.00942
ENSG00000152229.18	PSTPIP2	4.90932	-4.77176	1.44824	-3.29485	0.000984725	0.00534254	chr18:45983536-46072272	-	14.1943	7.4467	6.83643	0.978429	0	0
ENSG00000258696.1	CTD-2058B24.3	3.21499	-5.17202	1.57025	-3.29376	0.000988575	0.00536079	chr14:38003113-38004847	-	8.11104	5.31907	5.8598	0	0	0
ENSG00000285863.1	RP11-16B9.3	14.1978	1.96276	0.596	3.29323	0.000990438	0.00536957	chr15:61861109-61894164	+	5.0694	8.51052	3.90653	24.4607	24.2138	19.0256
ENSG00000227674.3	LINC00355	6.3148	4.15362	1.26157	3.29243	0.000993274	0.0053823	chr13:63851197-64076044	-	0	0	1.95327	14.6764	10.2443	11.0148
ENSG00000164619.10	BMPER	24.7252	1.40267	0.427004	3.2849	0.00102018	0.00551185	chr7:33904308-34156427	+	12.1666	14.8934	13.6729	40.1156	34.4581	33.0444
ENSG00000230712.3	GGTLC4P	21.989	-1.6031	0.488266	-3.28324	0.0010262	0.00553625	chr22:24248074-24249466	-	40.5552	26.5954	32.2289	6.849	17.6947	8.01077
ENSG00000197301.7	HMGA2-AS1	15.8616	-1.96673	0.599058	-3.28304	0.00102693	0.00553751	chr12:65851340-65882167	-	18.2498	22.3401	35.1588	1.95686	7.45041	10.0135
ENSG00000287439.1	CTD-2007H18.2	7.16108	3.26784	0.995709	3.28192	0.00103102	0.00555681	chr15:47956521-47988044	-	2.02776	0	1.95327	12.7196	10.2443	16.0215
ENSG00000149257.16	SERPINH1	10.139	-2.59838	0.792335	-3.2794	0.0010403	0.00560409	chr11:75562056-75572783	+	14.1943	24.4677	13.6729	0.978429	6.51911	1.00135
ENSG00000158887.19	MPZ	8.91497	2.69935	0.825322	3.27066	0.00107296	0.00576596	chr1:161304735-161309968	-	2.02776	3.19144	1.95327	8.80586	20.4886	17.0229
ENSG00000213613.2	RPL11P3	25.6927	-1.49559	0.458225	-3.26388	0.00109898	0.00589439	chr10:87945502-87946024	+	27.3748	43.6164	42.9719	10.7627	21.4199	8.01077
ENSG00000280432.1	AP000962.1	24.4588	-1.46608	0.44992	-3.25854	0.00111987	0.00599474	chr21:16525919-16527019	+	40.5552	31.9144	35.1588	9.78429	9.31301	20.0269
ENSG00000251273.4	LINC02228	8.60614	2.9078	0.892546	3.25787	0.00112251	0.00600741	chr5:25087450-25190956	-	0	2.12763	3.90653	23.4823	12.1069	10.0135
ENSG00000125618.18	PAX8	25.2218	-1.4004	0.43001	-3.25666	0.00112733	0.00602883	chr2:113215997-113278921	-	39.5413	35.1059	35.1588	17.6117	14.9008	9.01211
ENSG00000231023.7	LINC00326	6.37055	-3.60023	1.1087	-3.24725	0.00116525	0.00621353	chr6:132954257-133107410	+	11.1527	8.51052	15.6261	0	0.931301	2.00269
ENSG00000269921.1	RP11-646I6.5	23.7142	1.42632	0.439329	3.24658	0.00116799	0.00622574	chr4:56387625-56388153	+	13.1804	11.702	13.6729	41.094	32.5955	30.0404
ENSG00000242009.2	RP11-359D24.1	3.36145	5.16894	1.59339	3.24399	0.00117868	0.00627151	chr3:81840514-81953534	+	0	0	0	9.78429	8.38171	2.00269
ENSG00000186710.12	CFAP73	10.9012	-2.20694	0.681904	-3.23645	0.00121028	0.00642111	chr12:113149724-113159276	+	18.2498	15.9572	19.5327	2.93529	3.7252	5.00673
ENSG00000287414.1	RP11-215P9.1	4.82836	4.67911	1.44616	3.23555	0.00121411	0.00643983	chr2:132010195-132017000	+	0	0	0.976633	11.7411	10.2443	6.00808
ENSG00000258657.5	RP11-104E19.1	6.48617	3.56229	1.10176	3.23328	0.00122377	0.00648487	chr14:24595723-24657774	+	2.02776	0	0.976633	15.6549	10.2443	10.0135
ENSG00000285694.1	RP11-274H24.3	8.40888	2.85403	0.882765	3.23306	0.00122473	0.00648683	chr6:4449392-4468181	+	4.05552	2.12763	0	13.698	19.5573	11.0148
ENSG00000126259.20	KIRREL2	49.4614	-1.04436	0.323318	-3.23013	0.00123734	0.00654264	chr19:35855861-35867136	+	74.0133	57.446	68.3643	19.5686	36.3207	41.0552
ENSG00000137033.12	IL33	5.39689	4.84402	1.50095	3.22729	0.00124967	0.0066015	chr9:6215786-6257983	+	0	1.06381	0	1.95686	22.3512	7.00942
ENSG00000154162.15	CDH12	12.991	-2.00697	0.622162	-3.2258	0.0012562	0.00663443	chr5:21750673-22853344	-	23.3192	24.4677	14.6495	3.91372	5.58781	6.00808
ENSG00000179057.14	IGSF22	17.7155	1.6683	0.517912	3.22121	0.00127652	0.00673369	chr11:18704312-18726230	-	8.11104	8.51052	8.7897	26.4176	21.4199	33.0444
ENSG00000272944.1	CTD-2308L22.1	8.43887	-2.68198	0.832935	-3.21991	0.00128231	0.00675774	chr2:221572506-221574454	+	10.1388	17.021	16.6028	2.93529	0.931301	3.00404
ENSG00000100346.18	CACNA1I	6.29238	-3.56863	1.11088	-3.21242	0.00131621	0.00692318	chr22:39570753-39689735	+	14.1943	12.7658	7.81307	0.978429	0	2.00269
ENSG00000276704.1	RP11-128N14.4	3.04812	-5.09486	1.58679	-3.2108	0.00132366	0.00696073	chr13:97437268-97437630	+	5.0694	6.38289	6.83643	0	0	0
ENSG00000165566.13	AMER2	4.72201	4.641	1.44805	3.205	0.00135062	0.00708561	chr13:25161679-25172288	-	1.01388	0	0	9.78429	6.51911	11.0148
ENSG00000116194.13	ANGPTL1	14.1836	1.87159	0.58412	3.20412	0.00135478	0.00710405	chr1:178849535-178871077	-	6.08328	5.31907	6.83643	26.4176	21.4199	19.0256
ENSG00000073737.17	DHRS9	14.4389	-1.88073	0.587725	-3.20001	0.00137422	0.00718724	chr2:169064789-169096167	+	17.236	24.4677	26.3691	4.89214	4.65651	9.01211
ENSG00000083067.24	TRPM3	41.1436	1.26982	0.396937	3.19905	0.00137882	0.00720741	chr9:70529060-71446904	-	31.4303	7.4467	33.2055	53.8136	55.8781	65.0875
ENSG00000258920.1	FOXN3-AS1	9.87522	-2.35999	0.738249	-3.19673	0.00138993	0.0072505	chr14:89417354-89419793	+	12.1666	15.9572	21.4859	3.91372	3.7252	2.00269
ENSG00000176945.17	MUC20	33.2213	1.21564	0.380302	3.19651	0.00139102	0.00725275	chr3:195720884-195741123	+	20.2776	20.2125	19.5327	32.2882	54.9468	52.07
ENSG00000173557.15	FAM166C	7.16609	-3.31201	1.0364	-3.19568	0.00139503	0.00726849	chr2:26562585-26579532	+	13.1804	17.021	8.7897	0	0	4.00538
ENSG00000277268.2	LHX1-DT	36.3748	1.233	0.38602	3.19413	0.00140253	0.00730414	chr17:36861674-36936670	-	20.2776	24.4677	20.5093	32.2882	72.6415	48.0646
ENSG00000160339.16	FCN2	16.3182	-1.77291	0.555278	-3.19282	0.00140889	0.00733379	chr9:134880810-134887523	+	19.2637	22.3401	34.1822	5.87057	10.2443	6.00808
ENSG00000227170.1	AF178030.2	36.5731	-1.13719	0.356412	-3.19066	0.0014195	0.00737858	chr8:115509602-115511325	+	55.7634	40.425	54.6915	18.5901	27.939	22.0296
ENSG00000164627.18	KIF6	11.3655	-2.14326	0.671973	-3.1895	0.00142518	0.00740461	chr6:39329990-39725408	-	20.2776	13.8296	21.4859	5.87057	3.7252	3.00404
ENSG00000041515.16	MYO16	8.84064	-2.79458	0.878086	-3.18258	0.00145971	0.00756267	chr13:108596152-109208005	+	20.2776	9.57433	16.6028	0	5.58781	1.00135
ENSG00000224141.6	MIR548XHG	3.07011	5.03594	1.58282	3.18162	0.00146455	0.00758584	chr21:18561265-18760320	-	0	0	0	4.89214	6.51911	7.00942
ENSG00000188051.7	TMEM221	24.9172	-1.52581	0.479604	-3.1814	0.00146566	0.00758756	chr19:17435509-17448668	-	33.4581	41.4888	36.1354	3.91372	20.4886	14.0188
ENSG00000280165.1	PCDH20	4.73993	-4.71837	1.48382	-3.17989	0.00147332	0.00762247	chr13:61409685-61415522	-	17.236	5.31907	4.88317	0	0	1.00135
ENSG00000249278.1	RP11-688H10.1	6.09549	-3.53513	1.11242	-3.17787	0.0014836	0.00766845	chr4:76509284-76509719	-	11.1527	12.7658	9.76633	1.95686	0.931301	0
ENSG00000248648.1	RP11-485M7.1	3.05462	5.02994	1.58513	3.1732	0.00150768	0.00778563	chr5:133003119-133003365	+	0	0	0	5.87057	7.45041	5.00673
ENSG00000205978.6	NYNRIN	21.8198	1.59353	0.502554	3.17087	0.00151984	0.00784293	chr14:24399003-24419283	+	19.2637	7.4467	5.8598	32.2882	27.0077	39.0525
ENSG00000207870.1	MIR221	8.09789	-2.62538	0.828428	-3.16912	0.00152903	0.00788667	chrX:45746157-45746266	-	13.1804	15.9572	12.6962	1.95686	2.7939	2.00269
ENSG00000155918.8	RAET1L	18.6175	-1.64892	0.520332	-3.16897	0.00152979	0.00788872	chr6:150018334-150025532	-	21.2915	36.1697	27.3457	9.78429	12.1069	5.00673
ENSG00000138152.10	BTBD16	23.8053	1.42757	0.45113	3.16443	0.00155389	0.00800177	chr10:122271296-122338159	+	17.236	11.702	9.76633	42.0724	27.0077	35.0471
ENSG00000173262.12	SLC2A14	15.427	-1.92361	0.609746	-3.15478	0.00160622	0.00824434	chr12:7812512-7891148	-	24.3331	12.7658	36.1354	2.93529	8.38171	8.01077
ENSG00000099260.11	PALMD	4.40496	-4.61145	1.46196	-3.1543	0.00160886	0.00825213	chr1:99646113-99694541	+	8.11104	9.57433	7.81307	0	0.931301	0
ENSG00000181652.19	ATG9B	26.0214	-1.54859	0.491681	-3.14959	0.00163498	0.00836668	chr7:151012209-151024499	-	65.9022	19.1487	31.2523	16.6333	11.1756	12.0162
ENSG00000131097.7	HIGD1B	16.3267	1.67616	0.532924	3.14522	0.00165964	0.00848498	chr17:44846353-44850476	+	9.12492	6.38289	7.81307	24.4607	25.1451	25.0337
ENSG00000272416.1	CTD-2081C10.7	6.00766	4.06221	1.29272	3.14237	0.00167588	0.00856008	chr5:53880293-53881051	-	0	1.06381	0.976633	20.547	7.45041	6.00808
ENSG00000153283.13	CD96	3.04698	5.02692	1.6024	3.13711	0.00170621	0.00870697	chr3:111292719-111665750	+	0	0	0	7.82743	7.45041	3.00404
ENSG00000250722.6	SELENOP	27.9653	1.27816	0.407513	3.13649	0.00170984	0.00871941	chr5:42799880-42887392	-	13.1804	20.2125	15.6261	40.1156	32.5955	46.0619
ENSG00000110195.14	FOLR1	41.4338	-1.06749	0.340597	-3.13417	0.00172341	0.00878256	chr11:72189558-72196323	+	70.9716	43.6164	53.7148	30.3313	27.939	22.0296
ENSG00000272374.1	RP3-329A5.8	28.4408	-1.2615	0.402717	-3.13248	0.00173338	0.00883133	chr6:35220370-35224630	-	43.5969	31.9144	44.9251	13.698	20.4886	16.0215
ENSG00000163624.6	CDS1	13.9755	-1.94124	0.62032	-3.12942	0.00175154	0.00891358	chr4:84583127-84651334	+	24.3331	14.8934	27.3457	7.82743	7.45041	2.00269
ENSG00000120256.11	LRP11	48.5819	-1.10281	0.353458	-3.12007	0.00180807	0.00916531	chr6:149818757-149864359	-	57.7912	49.9993	90.8269	24.4607	22.3512	46.0619
ENSG00000181215.15	C4orf50	2.90609	-5.02355	1.6105	-3.11925	0.00181309	0.00918445	chr4:5897373-6200555	-	6.08328	7.4467	3.90653	0	0	0
ENSG00000163536.13	SERPINI1	8.77013	2.44719	0.787748	3.10656	0.00189276	0.0095595	chr3:167735243-167825569	+	3.04164	3.19144	1.95327	15.6549	16.7634	12.0162
ENSG00000150337.14	FCGR1A	5.52637	-4.02689	1.29644	-3.10611	0.00189567	0.00956982	chr1:149782671-149791675	+	11.1527	7.4467	12.6962	0	1.8626	0
ENSG00000140873.16	ADAMTS18	5.90775	-3.48718	1.12478	-3.10031	0.0019332	0.00973478	chr16:77247813-77435034	-	14.1943	9.57433	8.7897	1.95686	0.931301	0
ENSG00000087245.13	MMP2	39.8381	-1.15553	0.372911	-3.09867	0.00194388	0.0097819	chr16:55389700-55506691	+	59.8189	54.2545	50.7849	13.698	21.4199	39.0525
ENSG00000249867.6	LINC02742	10.7797	-2.18144	0.704032	-3.09849	0.00194509	0.00978571	chr11:28702607-29064322	+	14.1943	20.2125	18.556	6.849	1.8626	3.00404
ENSG00000273375.1	RP11-803P9.1	13.339	1.86482	0.602012	3.09765	0.00195063	0.00981135	chr3:197789700-197790369	+	5.0694	5.31907	6.83643	22.5039	23.2825	17.0229
ENSG00000203805.11	PLPP4	4.48083	4.56715	1.47777	3.09058	0.00199765	0.0100342	chr10:120457227-120592065	+	1.01388	0	0	4.89214	13.9695	7.00942
ENSG00000148053.17	NTRK2	741.433	1.01527	0.328907	3.08681	0.00202317	0.0101485	chr9:84668551-85027054	+	448.135	339.357	684.62	976.472	834.446	1165.57
ENSG00000165197.5	VEGFD	29.0179	-1.2535	0.406366	-3.08466	0.00203785	0.0102198	chrX:15345596-15384413	-	39.5413	36.1697	46.8784	24.4607	13.0382	14.0188
ENSG00000168505.7	GBX2	24.0507	1.35678	0.440364	3.08104	0.00206276	0.0103273	chr2:236165236-236168386	-	11.1527	11.702	17.5794	41.094	30.7329	32.0431
ENSG00000224786.2	CETN4P	28.3539	1.23434	0.401949	3.07089	0.0021342	0.0106402	chr4:122728532-122732482	-	19.2637	13.8296	17.5794	47.943	34.4581	37.0498
ENSG00000269994.3	LINC02893	5.43675	-3.96981	1.29385	-3.06821	0.00215348	0.010729	chr9:87008440-87042419	-	12.1666	10.6381	7.81307	0	0	2.00269
ENSG00000163520.14	FBLN2	26.385	1.29258	0.421381	3.06748	0.00215873	0.0107506	chr3:13549125-13638422	+	19.2637	15.9572	10.743	43.0509	37.252	32.0431
ENSG00000165923.16	AGBL2	33.3447	1.15644	0.377019	3.06733	0.00215979	0.0107506	chr11:47659591-47715389	-	18.2498	21.2763	22.4626	53.8136	51.2216	33.0444
ENSG00000128422.17	KRT17	9.56883	-2.3108	0.75364	-3.06618	0.00216813	0.0107823	chr17:41619442-41624842	-	17.236	15.9572	14.6495	0.978429	5.58781	3.00404
ENSG00000259520.6	CTD-2651B20.3	25.9777	-1.31963	0.430401	-3.06605	0.00216906	0.0107823	chr15:45235930-45279251	-	34.4719	30.8506	45.9018	9.78429	15.8321	19.0256
ENSG00000170323.9	FABP4	2.93464	4.96872	1.62062	3.06594	0.0021699	0.0107841	chr8:81478419-81483236	-	0	0	0	8.80586	2.7939	6.00808
ENSG00000265962.1	GACAT2	22.4356	-1.40609	0.458758	-3.065	0.00217669	0.0108129	chr18:8695856-8707621	-	27.3748	36.1697	34.1822	7.82743	13.0382	16.0215
ENSG00000184669.9	OR7E14P	25.3749	-1.27123	0.415186	-3.06183	0.00219989	0.0109159	chr11:17013998-17053024	+	33.4581	35.1059	39.0653	13.698	14.9008	16.0215
ENSG00000224865.8	AC009518.4	22.0147	1.42818	0.467145	3.05726	0.0022337	0.0110588	chr7:131897289-131948953	+	10.1388	15.9572	9.76633	25.4392	30.7329	40.0538
ENSG00000230140.7	NPAS2-AS1	6.20882	-3.11241	1.01824	-3.05667	0.00223813	0.0110758	chr2:100970767-100977766	-	13.1804	8.51052	11.7196	0.978429	1.8626	1.00135
ENSG00000259126.1	RP11-99L13.2	2.94558	-5.03998	1.64904	-3.05631	0.00224078	0.0110839	chr14:44392531-44393716	-	3.04164	11.702	2.9299	0	0	0
ENSG00000223784.2	LINP1	30.5921	-1.24809	0.408553	-3.0549	0.00225132	0.0111335	chr10:6709530-6740532	+	42.583	56.3822	30.2756	24.4607	15.8321	14.0188
ENSG00000276107.1	THBS1-IT1	7.21649	-3.01636	0.987793	-3.05364	0.00226086	0.0111732	chr15:39586561-39587293	+	13.1804	12.7658	12.6962	0	4.65651	0
ENSG00000258986.7	TMEM179	17.8377	-1.62712	0.533584	-3.04941	0.00229291	0.0113215	chr14:104474678-104605647	-	32.4442	18.0848	30.2756	4.89214	9.31301	12.0162
ENSG00000213997.3	PGAM1P7	9.96685	-2.20747	0.724866	-3.04535	0.00232408	0.0114574	chrX:46646594-46647330	-	18.2498	20.2125	10.743	2.93529	4.65651	3.00404
ENSG00000231367.6	LINC02613	7.42126	-2.7363	0.900034	-3.04022	0.00236405	0.0116259	chr2:38406527-38515934	-	13.1804	13.8296	11.7196	0	2.7939	3.00404
ENSG00000162692.12	VCAM1	22.6452	-1.38646	0.45629	-3.03855	0.0023772	0.0116828	chr1:100719742-100739045	+	27.3748	31.9144	39.0653	11.7411	16.7634	9.01211
ENSG00000238273.3	AC012360.6	19.9882	-1.46241	0.481683	-3.03605	0.00239701	0.0117697	chr2:105363038-105378839	+	34.4719	21.2763	32.2289	10.7627	11.1756	10.0135
ENSG00000232630.1	PRPS1P2	27.1161	-1.3939	0.459246	-3.0352	0.00240377	0.0117924	chr9:125150653-125151589	+	40.5552	36.1697	41.0186	26.4176	6.51911	12.0162
ENSG00000155875.15	SAXO1	15.5367	-1.67445	0.55408	-3.02204	0.00251077	0.0122601	chr9:18858906-19049358	-	17.236	24.4677	29.299	7.82743	8.38171	6.00808
ENSG00000261366.1	MANEA-DT	13.9841	1.85665	0.614453	3.02162	0.00251422	0.0122721	chr6:95575183-95577450	-	6.08328	3.19144	8.7897	30.3313	20.4886	15.0202
ENSG00000283176.1	RP11-629O1.3	7.22588	-2.69861	0.894023	-3.01851	0.00254025	0.0123903	chr8:133515506-133515745	+	16.2221	10.6381	10.743	1.95686	2.7939	1.00135
ENSG00000266256.3	LINC00683	4.17527	-4.53303	1.50228	-3.01744	0.0025492	0.0124257	chr18:76528652-76670111	+	10.1388	3.19144	10.743	0.978429	0	0
ENSG00000120332.16	TNN	5.86413	3.38888	1.12367	3.01592	0.00256203	0.01248	chr1:175067833-175148075	+	2.02776	1.06381	0	13.698	8.38171	10.0135
ENSG00000168243.11	GNG4	16.7888	-1.8302	0.606892	-3.01569	0.00256396	0.0124867	chr1:235547685-235650754	-	32.4442	15.9572	30.2756	11.7411	9.31301	1.00135
ENSG00000079101.16	CLUL1	5.28509	-3.93403	1.30732	-3.00923	0.00261913	0.0127133	chr18:596988-650334	+	8.11104	13.8296	7.81307	1.95686	0	0
ENSG00000259754.2	RP11-208K4.1	4.25254	4.48294	1.49064	3.00739	0.00263504	0.0127849	chr15:47812729-48050507	+	1.01388	0	0	10.7627	3.7252	10.0135
ENSG00000266074.10	BAHCC1	47.705	1.07745	0.358542	3.00508	0.0026551	0.0128692	chr17:81395457-81466332	+	37.5136	21.2763	33.2055	41.094	94.0614	59.0794
ENSG00000196196.3	HRCT1	46.6022	-1.03857	0.345654	-3.00465	0.00265889	0.0128808	chr9:35906202-35907136	+	43.5969	59.5736	84.9671	30.3313	39.1146	22.0296
ENSG00000237892.1	KLF7-IT1	13.2618	-1.82366	0.606944	-3.00466	0.00265876	0.0128808	chr2:207120884-207122044	-	18.2498	21.2763	22.4626	3.91372	4.65651	9.01211
ENSG00000130176.8	CNN1	4.28155	-4.56636	1.52063	-3.00295	0.00267377	0.0129443	chr19:11538767-11550323	+	12.1666	10.6381	1.95327	0	0.931301	0
ENSG00000196741.5	LINC01560	32.2725	-1.12075	0.373238	-3.00278	0.00267523	0.0129485	chrX:47483571-47484823	+	38.5275	53.1907	41.0186	18.5901	23.2825	19.0256
ENSG00000264215.1	RP11-283C24.1	23.0827	-1.36473	0.454674	-3.00155	0.00268609	0.0129954	chr17:20788071-20789584	+	23.3192	39.3611	37.1121	9.78429	14.9008	14.0188
ENSG00000155307.19	SAMSN1	5.71012	3.35245	1.1194	2.99486	0.0027457	0.0132519	chr21:14485228-14658821	-	1.01388	1.06381	0.976633	8.80586	8.38171	14.0188
ENSG00000184838.15	PRR16	7.98963	2.51445	0.840035	2.99327	0.00276006	0.0133124	chr5:120464300-120687332	+	4.05552	2.12763	0.976633	12.7196	13.0382	15.0202
ENSG00000233555.2	RP11-452D2.1	2.91151	4.95927	1.66038	2.98683	0.00281883	0.0135549	chr9:63581254-63581834	-	0	0	0	11.7411	3.7252	2.00269
ENSG00000275557.1	RP11-353N4.6	15.6151	1.6753	0.561214	2.98513	0.00283457	0.0136153	chr1:149607765-149612402	+	7.09716	7.4467	7.81307	28.3744	27.939	15.0202
ENSG00000103089.9	FA2H	4.11468	-4.50619	1.51096	-2.98234	0.0028605	0.013719	chr16:74712955-74774831	-	9.12492	11.702	2.9299	0	0.931301	0
ENSG00000173080.6	RXFP4	23.3495	1.33627	0.448145	2.98178	0.00286576	0.0137412	chr1:155941638-155943087	+	12.1666	15.9572	11.7196	28.3744	42.8399	29.039
ENSG00000267257.1	RP11-1151B14.4	11.6995	-2.05034	0.687901	-2.98057	0.00287711	0.0137867	chr18:58535415-58538552	+	24.3331	10.6381	21.4859	2.93529	2.7939	8.01077
ENSG00000231811.3	RP3-527G5.1	4.07041	4.41572	1.48179	2.97998	0.00288264	0.0138042	chr6:4341756-4347162	-	0	1.06381	0	7.82743	6.51911	9.01211
ENSG00000010379.16	SLC6A13	11.324	2.06765	0.69413	2.97877	0.00289406	0.0138498	chr12:220621-262873	-	6.08328	1.06381	5.8598	19.5686	22.3512	13.0175
ENSG00000288584.1	RP1-230L10.3	12.9156	1.89577	0.636618	2.97788	0.00290246	0.013878	chr6:164148022-164152175	+	3.04164	9.57433	3.90653	24.4607	20.4886	16.0215
ENSG00000230570.1	RP11-69L16.6	16.9258	-1.58828	0.533733	-2.97579	0.00292231	0.0139638	chr6:7340854-7342056	-	21.2915	25.5316	29.299	10.7627	4.65651	10.0135
ENSG00000258710.8	LINC01193	9.49458	-2.26825	0.762595	-2.97439	0.00293572	0.0140249	chr15:20940380-21058440	+	12.1666	21.2763	13.6729	3.91372	0.931301	5.00673
ENSG00000236460.1	SNX2P2	21.9686	-1.35852	0.457501	-2.96943	0.00298351	0.0142362	chr7:31941261-31941583	+	36.4997	31.9144	26.3691	10.7627	10.2443	16.0215
ENSG00000285582.1	RP11-87P3.1	4.06352	4.41803	1.48937	2.96637	0.00301337	0.014363	chr10:115123482-115218819	-	0	0	0.976633	5.87057	6.51911	11.0148
ENSG00000239893.2	ZNF736P9Y	5.70021	-3.45084	1.16365	-2.96552	0.00302172	0.0143983	chrY:8068445-8126293	-	14.1943	7.4467	9.76633	0	2.7939	0
ENSG00000171872.5	KLF17	16.9018	1.58124	0.534315	2.95938	0.00308255	0.0146566	chr1:44118821-44135140	+	11.1527	6.38289	7.81307	27.396	18.626	30.0404
ENSG00000167912.6	RP11-25K19.1	12.1927	-1.89572	0.641604	-2.95466	0.0031301	0.014873	chr8:59119040-59123478	+	25.347	12.7658	19.5327	6.849	4.65651	4.00538
ENSG00000265763.4	ZNF488	9.02646	-2.39836	0.812187	-2.95297	0.00314735	0.0149486	chr10:47365496-47384293	-	23.3192	9.57433	12.6962	0.978429	5.58781	2.00269
ENSG00000109956.13	B3GAT1	11.0476	2.01384	0.68214	2.95223	0.00315484	0.0149751	chr11:134378504-134412242	-	2.02776	4.25526	6.83643	15.6549	20.4886	17.0229
ENSG00000240710.1	RP11-430C7.4	9.131	2.33162	0.790272	2.9504	0.00317367	0.0150541	chr1:204603035-204616565	+	1.01388	2.12763	5.8598	12.7196	13.0382	20.0269
ENSG00000168874.13	ATOH8	5.18207	-3.93034	1.33705	-2.93957	0.00328663	0.0155033	chr2:85751344-85791383	+	15.2082	4.25526	9.76633	0	1.8626	0
ENSG00000154099.18	DNAAF1	18.7884	1.43496	0.488198	2.9393	0.00328952	0.0155137	chr16:84145287-84178767	+	11.1527	8.51052	10.743	26.4176	28.8703	27.0363
ENSG00000124215.17	CDH26	11.7806	2.00262	0.68164	2.93794	0.003304	0.015562	chr20:59958423-60034011	+	6.08328	2.12763	5.8598	18.5901	27.0077	11.0148
ENSG00000286084.2	RP3-359N14.3	32.6935	-1.13022	0.385468	-2.93208	0.00336705	0.0158151	chr6:105403207-105588802	+	45.6246	47.8717	41.0186	19.5686	13.0382	29.039
ENSG00000175426.11	PCSK1	39.9111	-1.04942	0.358209	-2.92963	0.00339364	0.0159231	chr5:96390333-96434143	-	67.93	46.8078	46.8784	22.5039	36.3207	19.0256
ENSG00000271040.1	TMEM242-DT	10.0889	2.13051	0.727847	2.92715	0.00342089	0.0160373	chr6:157323964-157324477	+	4.05552	5.31907	1.95327	10.7627	21.4199	17.0229
ENSG00000214182.5	PTMAP5	15.5221	-1.5913	0.543828	-2.9261	0.00343239	0.0160844	chr13:81689911-81691072	+	24.3331	20.2125	25.3925	5.87057	9.31301	8.01077
ENSG00000171812.13	COL8A2	21.4554	-1.37768	0.471999	-2.91881	0.00351367	0.0164061	chr1:36095239-36125222	-	35.4858	35.1059	22.4626	13.698	13.9695	8.01077
ENSG00000257097.1	CLIP1-AS1	13.0291	1.80581	0.619434	2.91525	0.00355401	0.0165707	chr12:122395542-122400857	+	5.0694	8.51052	3.90653	18.5901	26.0764	16.0215
ENSG00000148426.13	PROSER2	6.19472	3.00875	1.03299	2.91266	0.00358366	0.0166905	chr10:11823339-11872277	+	0	3.19144	0.976633	11.7411	10.2443	11.0148
ENSG00000283563.1	RP11-9J18.1	32.9379	1.12218	0.3856	2.91022	0.00361169	0.0168104	chr3:28349178-29767537	+	13.1804	27.6592	21.4859	38.1587	53.0842	44.0592
ENSG00000174403.16	MIR1-1HG-AS1	5.3553	-3.33969	1.15029	-2.90334	0.00369203	0.0171482	chr20:62544343-62551526	-	9.12492	7.4467	12.6962	0	1.8626	1.00135
ENSG00000248971.2	KRT8P46	19.0639	-1.5373	0.52977	-2.90183	0.00370994	0.0172241	chr4:102728746-102730171	-	36.4997	31.9144	16.6028	7.82743	6.51911	15.0202
ENSG00000145088.9	EAF2	29.0225	1.30213	0.44879	2.90142	0.00371473	0.0172427	chr3:121835183-121886526	+	18.2498	6.38289	25.3925	53.8136	37.252	33.0444
ENSG00000218549.2	OR4K12P	5.24502	3.83292	1.32118	2.90113	0.00371819	0.0172479	chr21:13581060-13582004	-	0	2.12763	0	5.87057	7.45041	16.0215
ENSG00000279722.1	RP11-44F14.6	32.7867	-1.08322	0.373751	-2.89824	0.00375268	0.017375	chr16:53487607-53489943	-	44.6107	49.9993	39.0653	27.396	18.626	17.0229
ENSG00000186197.15	EDARADD	11.7833	1.96771	0.679976	2.8938	0.00380612	0.0175966	chr1:236348257-236502915	+	6.08328	7.4467	0.976633	14.6764	20.4886	21.0283
ENSG00000158270.12	COLEC12	16.8483	-1.59871	0.552486	-2.89366	0.00380779	0.0176007	chr18:316737-500722	-	28.3887	21.2763	26.3691	2.93529	12.1069	10.0135
ENSG00000286615.1	CTB-88F18.6	4.05535	4.41127	1.52729	2.8883	0.0038733	0.0178735	chr5:127231977-127290731	-	0	1.06381	0	14.6764	5.58781	3.00404
ENSG00000272142.4	LYRM4-AS1	33.5666	1.05771	0.366458	2.88631	0.00389792	0.0179759	chr6:5003774-5045666	+	18.2498	27.6592	19.5327	43.0509	42.8399	50.0673
ENSG00000131781.13	FMO5	36.8782	1.00582	0.348766	2.88394	0.00392732	0.0181039	chr1:147175351-147243050	-	22.3054	30.8506	20.5093	49.8999	45.6338	52.07
ENSG00000147869.5	CER1	6.44408	-2.79714	0.971417	-2.87945	0.00398373	0.018318	chr9:14719724-14722733	-	14.1943	12.7658	6.83643	2.93529	0.931301	1.00135
ENSG00000183840.7	GPR39	23.9558	-1.24498	0.432421	-2.8791	0.00398816	0.0183346	chr2:132416805-132646582	+	33.4581	39.3611	28.3224	11.7411	15.8321	15.0202
ENSG00000166349.10	RAG1	12.297	1.82189	0.633004	2.87817	0.00399989	0.0183808	chr11:36510709-36593156	+	7.09716	4.25526	4.88317	17.6117	14.9008	25.0337
ENSG00000264444.1	SDHCP1	5.34514	3.24993	1.13015	2.87565	0.00403197	0.0185128	chr18:68866517-68867028	+	1.01388	1.06381	0.976633	7.82743	11.1756	10.0135
ENSG00000271590.1	RP11-181E10.3	40.4775	-1.05044	0.365514	-2.87386	0.00405483	0.0185946	chr2:111210995-111212476	-	40.5552	59.5736	63.4812	31.3097	14.9008	33.0444
ENSG00000177483.12	RBM44	36.3095	-1.02135	0.355505	-2.87295	0.00406661	0.0186409	chr2:237798389-237842808	+	41.5691	44.6802	59.5746	25.4392	19.5573	27.0363
ENSG00000214783.9	POLR2J4	28.633	1.13129	0.394087	2.87066	0.00409619	0.0187609	chr7:43940895-44019175	-	19.2637	17.021	17.5794	43.0509	42.8399	32.0431
ENSG00000248152.2	ANK2-AS1	13.8171	1.70912	0.59618	2.86678	0.00414668	0.0189646	chr4:112973272-113071962	-	5.0694	8.51052	5.8598	21.5254	14.9008	27.0363
ENSG00000166104.15	RP11-299H22.3	4.9907	3.7973	1.32551	2.86477	0.00417307	0.0190774	chr15:62227896-62253235	-	0	0	1.95327	5.87057	12.1069	10.0135
ENSG00000179776.19	CDH5	4.00588	-4.46932	1.56211	-2.86108	0.00422205	0.0192694	chr16:66366622-66404784	+	13.1804	1.06381	8.7897	0	0	1.00135
ENSG00000203721.7	LINC00862	18.5883	1.48793	0.52073	2.8574	0.0042713	0.0194588	chr1:200253419-200400705	-	15.2082	4.25526	9.76633	24.4607	29.8016	28.0377
ENSG00000185860.13	CCDC190	5.09406	3.78687	1.32562	2.85668	0.00428092	0.0194978	chr1:162824458-162868815	-	0	2.12763	0	10.7627	4.65651	13.0175
ENSG00000249252.5	C1QTNF7-AS1	16.6641	-1.55375	0.545008	-2.85088	0.00435982	0.0198031	chr4:15004942-15427914	-	23.3192	28.723	22.4626	11.7411	3.7252	10.0135
ENSG00000260000.2	RP3-467N11.1	28.2737	1.14987	0.403347	2.85083	0.00436052	0.0198031	chr6:100881471-100882987	+	13.1804	17.021	22.4626	41.094	42.8399	33.0444
ENSG00000225285.1	LINC01770	7.53011	-2.5005	0.877209	-2.85051	0.00436487	0.0198188	chr1:1430539-1434573	-	20.2776	6.38289	11.7196	2.93529	1.8626	2.00269
ENSG00000278709.2	NKILA	19.0685	1.39835	0.490979	2.84808	0.00439839	0.0199587	chr20:57710156-57712780	+	9.12492	10.6381	11.7196	25.4392	34.4581	23.031
ENSG00000154645.14	CHODL	9.54643	-2.28984	0.804192	-2.84738	0.00440805	0.0199902	chr21:17901263-18267373	+	20.2776	10.6381	16.6028	7.82743	0.931301	1.00135
ENSG00000256120.2	SOX5-AS1	10.6389	1.94012	0.683163	2.83991	0.00451257	0.0204222	chr12:24223233-24260056	+	3.04164	4.25526	5.8598	17.6117	13.0382	20.0269
ENSG00000170231.16	FABP6	5.39469	3.24645	1.14542	2.83429	0.0045927	0.0207423	chr5:160187367-160238735	+	1.01388	2.12763	0	7.82743	8.38171	13.0175
ENSG00000144908.14	ALDH1L1	6.4329	-2.78474	0.98262	-2.83399	0.00459703	0.0207536	chr3:126103562-126197994	-	15.2082	10.6381	7.81307	2.93529	0	2.00269
ENSG00000138675.17	FGF5	3.72899	4.28465	1.51277	2.83233	0.00462103	0.0208532	chr4:80266639-80336680	+	0	1.06381	0	9.78429	6.51911	5.00673
ENSG00000259868.3	RP11-1012E15.2	20.938	-1.36542	0.482432	-2.83029	0.00465052	0.0209563	chr14:55896443-55962970	+	37.5136	25.5316	27.3457	13.698	6.51911	15.0202
ENSG00000269028.3	MTRNR2L12	25.2377	-1.22839	0.434221	-2.82896	0.00466995	0.0210353	chr3:96617188-96618236	-	39.5413	26.5954	40.042	11.7411	20.4886	13.0175
ENSG00000277758.6	ABC7-42404400C24.1	33.4264	-1.14663	0.405627	-2.82681	0.00470138	0.0211596	chr10:47744717-47763592	-	55.7634	42.5526	40.042	18.5901	32.5955	11.0148
ENSG00000287405.1	RP11-275G7.3	27.3559	-1.12973	0.399797	-2.82576	0.00471688	0.0212207	chr2:239194118-239197654	+	37.5136	34.0421	41.0186	16.6333	14.9008	20.0269
ENSG00000268894.7	PLCE1-AS1	12.2906	-1.78427	0.631638	-2.82483	0.00473058	0.0212736	chr10:94278681-94287478	-	20.2776	20.2125	16.6028	3.91372	3.7252	9.01211
ENSG00000279029.1	RP11-144I2.1	12.0919	-1.77388	0.629139	-2.81954	0.00480933	0.0216014	chr10:24481180-24483034	-	20.2776	21.2763	14.6495	4.89214	7.45041	4.00538
ENSG00000146090.16	RASGEF1C	22.1514	1.27779	0.45385	2.81544	0.004871	0.0218369	chr5:180100795-180209211	-	15.2082	14.8934	8.7897	34.245	30.7329	29.039
ENSG00000175274.19	TP53I11	37.281	-1.03001	0.365998	-2.81426	0.00488903	0.0219014	chr11:44885903-44951306	-	61.8467	54.2545	34.1822	19.5686	29.8016	24.0323
ENSG00000256234.1	RP11-283G6.4	3.71685	4.28339	1.52271	2.81299	0.00490826	0.0219787	chr12:26211164-26335856	-	1.01388	0	0	10.7627	6.51911	4.00538
ENSG00000232415.1	ELN-AS1	8.67606	2.2334	0.795332	2.80813	0.00498297	0.0222842	chr7:74059576-74062284	-	1.01388	3.19144	4.88317	13.698	10.2443	19.0256
ENSG00000259590.1	LINC02244	3.53462	-4.27993	1.52437	-2.80767	0.00499016	0.0223092	chr15:99395179-99396593	-	7.09716	5.31907	7.81307	0.978429	0	0
ENSG00000214534.5	ZNF705E	3.69068	4.27667	1.52341	2.80729	0.00499597	0.0223306	chr11:71814045-71821548	-	0	0	0.976633	3.91372	10.2443	7.00942
ENSG00000234861.2	ATP5F1AP1	6.58515	2.74198	0.97723	2.80587	0.00501804	0.0224132	chr9:42410830-42412150	-	1.01388	3.19144	0.976633	12.7196	5.58781	16.0215
ENSG00000267405.1	CTC-296K1.4	12.2815	2.1911	0.780973	2.8056	0.00502228	0.0224255	chr17:44794747-44797783	-	12.1666	1.06381	0	21.5254	14.9008	24.0323
ENSG00000242512.9	LINC01206	16.4016	-1.46722	0.523058	-2.80508	0.00503037	0.0224571	chr3:181952343-182035644	+	21.2915	26.5954	24.4158	9.78429	9.31301	7.00942
ENSG00000224173.2	LINC02831	6.82955	2.52478	0.900441	2.80393	0.00504831	0.0225236	chr2:67562067-67620545	+	2.02776	1.06381	2.9299	10.7627	11.1756	13.0175
ENSG00000273311.1	DGCR11	29.5997	-1.07087	0.383327	-2.79361	0.00521226	0.0231567	chr22:19046162-19048375	-	36.4997	45.744	38.0887	17.6117	18.626	21.0283
ENSG00000182459.5	TEX19	18.4917	-1.43131	0.513036	-2.78988	0.00527275	0.0233831	chr17:82359247-82363775	+	29.4025	34.0421	17.5794	11.7411	11.1756	7.00942
ENSG00000129538.14	RNASE1	9.31664	-2.42883	0.871594	-2.78665	0.00532559	0.0235796	chr14:20801228-20802855	-	8.11104	23.4039	15.6261	7.82743	0.931301	0
ENSG00000213277.3	MARCKSL1P1	10.8275	-1.92224	0.69038	-2.78432	0.00536406	0.0237118	chr10:103175554-103176094	+	12.1666	26.5954	12.6962	3.91372	5.58781	4.00538
ENSG00000234428.2	RP11-666F17.1	29.0803	1.08212	0.388714	2.78386	0.00537164	0.0237406	chr12:26623369-26649479	+	16.2221	20.2125	19.5327	36.2019	37.252	45.0606
ENSG00000073146.16	MOV10L1	26.3799	-1.13639	0.408497	-2.78189	0.00540437	0.0238658	chr22:50089879-50161690	+	42.583	32.9783	33.2055	18.5901	14.9008	16.0215
ENSG00000220472.1	RP11-69L16.5	16.3283	-1.60884	0.578357	-2.78174	0.00540691	0.0238678	chr6:7338839-7339568	-	22.3054	20.2125	31.2523	14.6764	6.51911	3.00404
ENSG00000253452.6	RP11-473J6.1	3.55521	4.21827	1.51905	2.77691	0.00548776	0.0241957	chr8:35862123-36191194	+	0	0	0.976633	7.82743	6.51911	6.00808
ENSG00000276248.1	RP11-230F18.5	14.9295	-1.57999	0.569123	-2.77619	0.00550008	0.0242403	chr13:113527260-113530621	+	20.2776	22.3401	24.4158	5.87057	4.65651	12.0162
ENSG00000165633.13	VSTM4	17.6687	-1.47538	0.53169	-2.77488	0.00552216	0.0243182	chr10:49014236-49115522	-	23.3192	23.4039	31.2523	3.91372	12.1069	12.0162
ENSG00000249577.1	CTD-2195M15.1	3.56927	4.22098	1.52133	2.77454	0.00552807	0.0243394	chr5:127465822-127466118	+	1.01388	0	0	8.80586	5.58781	6.00808
ENSG00000235172.8	LINC01366	21.0964	1.30874	0.471803	2.77391	0.00553863	0.024381	chr5:170307722-170335508	+	14.1943	7.4467	14.6495	25.4392	29.8016	35.0471
ENSG00000257056.3	LINC02282	9.87479	-2.03364	0.734115	-2.7702	0.00560222	0.0246364	chr14:28782909-28785798	-	20.2776	11.702	15.6261	0.978429	4.65651	6.00808
ENSG00000287539.1	RP11-323N12.6	3.58455	4.2262	1.52694	2.76775	0.00564443	0.0248022	chr17:78845345-78846686	+	1.01388	0	0	4.89214	5.58781	10.0135
ENSG00000250132.6	RP11-359B12.2	23.3258	-1.19623	0.432499	-2.76586	0.00567731	0.0249219	chr12:974133-991190	-	32.4442	30.8506	34.1822	13.698	16.7634	12.0162
ENSG00000272824.1	RP6-74O6.6	7.91786	2.29048	0.828485	2.76465	0.00569831	0.0249942	chr1:148358245-148358686	-	3.04164	1.06381	3.90653	9.78429	17.6947	12.0162
ENSG00000120471.16	TP53AIP1	5.33157	3.24847	1.17514	2.76432	0.00570407	0.0250075	chr11:128934731-128943399	-	3.04164	0	0	10.7627	11.1756	7.00942
ENSG00000224843.8	LINC00240	27.4718	1.17377	0.424619	2.76429	0.00570474	0.0250075	chr6:26956932-27059749	+	18.2498	12.7658	19.5327	51.8567	35.3894	27.0363
ENSG00000272599.2	RP11-152N13.16	20.3774	1.3291	0.481376	2.76105	0.0057615	0.0252013	chr10:73124573-73125532	-	13.1804	14.8934	6.83643	25.4392	28.8703	33.0444
ENSG00000197584.12	KCNMB2	4.69787	3.66504	1.32783	2.76017	0.00577719	0.0252649	chr3:178272932-178844429	+	0	2.12763	0	8.80586	10.2443	7.00942
ENSG00000233766.7	CAVIN2-AS1	4.54141	-3.7255	1.35284	-2.75383	0.0058902	0.0257184	chr2:191846539-192044525	+	12.1666	6.38289	6.83643	0	1.8626	0
ENSG00000233785.1	RP13-314C10.5	10.2035	2.01661	0.732448	2.75324	0.00590077	0.0257543	chrX:23772992-23782956	-	1.01388	4.25526	6.83643	17.6117	20.4886	11.0148
ENSG00000273745.1	MIR6870	6.48985	2.72369	0.990045	2.75108	0.00593998	0.0258999	chr20:10649636-10649695	-	3.04164	2.12763	0	15.6549	12.1069	6.00808
ENSG00000176912.5	TYMSOS	25.6274	-1.16893	0.425218	-2.74901	0.00597747	0.0260174	chr18:630886-658340	-	42.583	28.723	35.1588	18.5901	17.6947	11.0148
ENSG00000214226.9	C17orf67	23.582	1.27103	0.46268	2.74711	0.00601229	0.0261532	chr17:56791913-56838773	-	18.2498	7.4467	15.6261	43.0509	26.0764	31.0417
ENSG00000009694.13	TENM1	5.70936	2.90398	1.05788	2.74509	0.0060495	0.0262995	chrX:124375903-124963817	-	2.02776	0	1.95327	8.80586	7.45041	14.0188
ENSG00000225511.7	LINC00475	15.9481	1.63818	0.596966	2.74417	0.00606642	0.0263626	chr9:92141298-92160114	+	11.1527	4.25526	7.81307	10.7627	31.6642	30.0404
ENSG00000173928.4	SWSAP1	22.8946	1.20429	0.438947	2.74358	0.00607727	0.0263994	chr19:11374666-11376951	+	12.1666	12.7658	16.6028	33.2666	33.5268	29.039
ENSG00000231530.1	RP11-187A9.3	3.39306	-4.2184	1.53755	-2.74358	0.00607724	0.0263994	chr13:42043727-42044247	-	7.09716	7.4467	4.88317	0	0.931301	0
ENSG00000229386.3	OR8B9P	3.42137	-4.22433	1.54276	-2.73816	0.00617849	0.0267654	chr11:124476963-124482870	-	5.0694	9.57433	4.88317	0	0	1.00135
ENSG00000165152.9	PGAP4	5.17404	-3.2911	1.20238	-2.73716	0.00619725	0.0268125	chr9:101473170-101533537	-	16.2221	3.19144	8.7897	0.978429	1.8626	0
ENSG00000259158.4	ADAM20P1	17.6008	-1.45179	0.531207	-2.73299	0.00627618	0.0270823	chr14:70453541-70483775	-	30.4164	23.4039	23.4392	14.6764	4.65651	9.01211
ENSG00000286017.1	RP11-21N3.2	4.71247	3.67901	1.3468	2.73168	0.00630131	0.0271536	chr3:196973709-196979197	+	1.01388	1.06381	0	2.93529	10.2443	13.0175
ENSG00000115590.14	IL1R2	13.7198	-1.61791	0.593011	-2.7283	0.00636617	0.0273849	chr2:101991960-102028544	+	16.2221	24.4677	21.4859	4.89214	10.2443	5.00673
ENSG00000117115.13	PADI2	14.5602	-1.54216	0.565333	-2.72788	0.00637421	0.0274142	chr1:17066761-17119451	-	25.347	19.1487	20.5093	4.89214	7.45041	10.0135
ENSG00000173114.13	LRRN3	15.51	-1.50914	0.55458	-2.72123	0.0065039	0.0278851	chr7:111091006-111125454	+	26.3609	18.0848	24.4158	11.7411	7.45041	5.00673
ENSG00000172005.11	MAL	3.6265	-4.31466	1.58567	-2.72103	0.0065079	0.027886	chr2:95025677-95053992	+	2.02776	14.8934	3.90653	0	0.931301	0
ENSG00000286383.1	RP11-450D21.4	4.92511	-3.20188	1.17668	-2.72113	0.006506	0.027886	chr1:203996532-204008357	+	9.12492	11.702	5.8598	0	1.8626	1.00135
ENSG00000100767.17	PAPLN	23.6757	-1.21898	0.448079	-2.72045	0.00651936	0.0279242	chr14:73237497-73274640	+	28.3887	44.6802	26.3691	10.7627	15.8321	16.0215
ENSG00000261335.1	RP11-318A15.2	14.506	1.53548	0.564854	2.71836	0.00656056	0.0280571	chr17:76671942-76673658	+	6.08328	7.4467	8.7897	17.6117	26.0764	21.0283
ENSG00000171450.6	CDK5R2	16.0697	1.57266	0.578577	2.71815	0.00656487	0.0280701	chr2:218959666-218962155	+	5.0694	6.38289	12.6962	33.2666	13.9695	25.0337
ENSG00000285551.2	RP11-13A2.4	5.551	2.84977	1.0486	2.71769	0.00657385	0.0280946	chr10:62520448-62672011	+	1.01388	1.06381	1.95327	11.7411	6.51911	11.0148
ENSG00000142552.8	RCN3	20.3978	-1.27093	0.468272	-2.71408	0.00664606	0.0283404	chr19:49528003-49546962	+	34.4719	27.6592	24.4158	9.78429	13.0382	13.0175
ENSG00000179796.12	LRRC3B	13.4519	1.66731	0.617623	2.69956	0.00694314	0.0294706	chr3:26622806-26717537	+	6.08328	6.38289	6.83643	11.7411	18.626	31.0417
ENSG00000254231.3	CTD-2284J15.1	15.7638	1.53038	0.566953	2.69931	0.00694843	0.0294874	chr8:86333274-86343429	-	12.1666	5.31907	6.83643	25.4392	29.8016	15.0202
ENSG00000233611.3	AC079135.1	5.19545	3.20579	1.18945	2.69518	0.00703498	0.0298146	chr2:236167447-236294927	+	3.04164	0	0	5.87057	10.2443	12.0162
ENSG00000265766.3	CXADRP3	6.43175	-2.48826	0.923584	-2.69414	0.00705703	0.0298966	chr18:14477955-14499278	-	12.1666	12.7658	7.81307	0.978429	1.8626	3.00404
ENSG00000229344.1	MTCO2P12	24.6508	-1.24312	0.461923	-2.69119	0.00711973	0.0301275	chr1:632757-633438	+	35.4858	36.1697	32.2289	23.4823	6.51911	14.0188
ENSG00000143028.9	SYPL2	32.4994	1.00387	0.373043	2.69103	0.00712316	0.0301362	chr1:109466546-109482134	+	21.2915	18.0848	25.3925	37.1803	40.9773	52.07
ENSG00000168122.4	ZNF355P	3.43098	4.16137	1.54647	2.69088	0.00712641	0.0301384	chr21:13095305-13113790	-	0	0	0.976633	5.87057	3.7252	10.0135
ENSG00000139344.8	AMDHD1	13.5981	1.58347	0.589099	2.68794	0.00718937	0.0303814	chr12:95943331-95968720	+	6.08328	8.51052	5.8598	26.4176	17.6947	17.0229
ENSG00000143365.19	RORC	6.54596	-2.51188	0.936	-2.68363	0.00728269	0.0307111	chr1:151806071-151831845	-	14.1943	7.4467	11.7196	0.978429	0.931301	4.00538
ENSG00000240429.1	LRRFIP1P1	36.9347	1.01252	0.377412	2.68279	0.00730104	0.030765	chr3:179259028-179261273	-	26.3609	28.723	18.556	42.0724	69.8476	36.0485
ENSG00000234663.7	LINC01934	5.73621	2.89671	1.08065	2.68052	0.0073507	0.0309447	chr2:181086076-181409321	+	2.02776	1.06381	0.976633	17.6117	3.7252	9.01211
ENSG00000248228.2	SLIT2-IT1	8.11629	-2.39095	0.892231	-2.67974	0.00736786	0.031011	chr4:20392154-20394856	+	7.09716	6.38289	27.3457	2.93529	0.931301	4.00538
ENSG00000251194.2	RP1-68D18.2	28.6317	-1.07497	0.401248	-2.67907	0.00738262	0.0310613	chr11:35212550-35214007	+	30.4164	49.9993	36.1354	15.6549	19.5573	20.0269
ENSG00000085276.19	MECOM	20.9036	1.27827	0.477383	2.67766	0.00741384	0.0311749	chr3:169083499-169663775	-	14.1943	10.6381	11.7196	27.396	21.4199	40.0538
ENSG00000232913.8	PLCE1-AS2	14.972	-1.51473	0.565685	-2.67768	0.00741335	0.0311749	chr10:94081950-94108814	-	19.2637	15.9572	31.2523	7.82743	6.51911	9.01211
ENSG00000226674.11	TEX41	6.49577	2.44044	0.911914	2.67617	0.00744692	0.031302	chr2:144666312-145262988	+	2.02776	1.06381	2.9299	10.7627	11.1756	11.0148
ENSG00000287986.1	RP11-327L3.7	8.67984	-2.1175	0.791731	-2.67452	0.00748367	0.0314266	chr9:35922159-35925554	-	12.1666	9.57433	20.5093	4.89214	0.931301	4.00538
ENSG00000253947.1	CTB-77H17.1	8.98703	-2.01157	0.752707	-2.67245	0.00752986	0.0316085	chr5:167965187-167967086	-	12.1666	21.2763	9.76633	3.91372	2.7939	4.00538
ENSG00000116663.11	FBXO6	18.5672	-1.48569	0.556057	-2.67184	0.00754377	0.0316609	chr1:11664200-11674354	+	37.5136	18.0848	26.3691	4.89214	6.51911	18.0242
ENSG00000204334.7	ERICH2	8.95679	-2.01537	0.754321	-2.67176	0.00754538	0.0316616	chr2:170783786-170798971	+	12.1666	20.2125	10.743	1.95686	4.65651	4.00538
ENSG00000258134.1	RP11-956A19.1	18.8988	-1.28773	0.482163	-2.67073	0.0075687	0.0317293	chr12:32227410-32228154	-	28.3887	27.6592	24.4158	8.80586	12.1069	12.0162
ENSG00000275793.1	RIMBP3	20.049	1.31974	0.49449	2.66889	0.00761028	0.0318976	chr22:18605815-18611919	-	17.236	6.38289	10.743	25.4392	34.4581	26.035
ENSG00000239218.2	RPS20P22	18.2323	-1.40404	0.526343	-2.66754	0.0076408	0.0320134	chr8:38434347-38435664	-	31.4303	25.5316	22.4626	3.91372	13.0382	13.0175
ENSG00000227929.4	SRGAP3-AS3	19.1986	-1.31105	0.491569	-2.66707	0.00765165	0.0320405	chr3:9216895-9219508	+	31.4303	21.2763	29.299	9.78429	8.38171	15.0202
ENSG00000198732.11	SMOC1	3.35308	4.13298	1.55491	2.65802	0.00786017	0.0327645	chr14:69854131-70032366	+	0	0	0.976633	4.89214	10.2443	4.00538
ENSG00000188649.15	CC2D2B	14.8691	-1.49806	0.564058	-2.65586	0.00791059	0.0329542	chr10:95907603-96033745	+	28.3887	15.9572	21.4859	9.78429	5.58781	8.01077
ENSG00000215417.13	MIR17HG	31.4027	-1.03861	0.391579	-2.65236	0.00799311	0.0331996	chr13:91347820-91354579	+	50.694	35.1059	41.0186	22.5039	26.0764	13.0175
ENSG00000213763.4	ACTBP2	19.6932	-1.30721	0.493272	-2.65008	0.00804737	0.0333873	chr5:77784881-77786003	+	24.3331	39.3611	20.5093	13.698	10.2443	10.0135
ENSG00000258168.6	RP11-588H23.3	12.6521	-1.65031	0.623156	-2.6483	0.00808976	0.0335379	chr12:70468080-70543040	+	21.2915	13.8296	22.4626	8.80586	6.51911	3.00404
ENSG00000228791.8	THRB-AS1	11.0928	1.74418	0.658779	2.64759	0.0081067	0.0335955	chr3:24494087-24681711	+	7.09716	5.31907	2.9299	16.6333	19.5573	15.0202
ENSG00000224822.1	THRB-IT1	18.914	1.31515	0.49711	2.64559	0.00815484	0.0337663	chr3:24455136-24459434	-	10.1388	11.702	10.743	20.547	36.3207	24.0323
ENSG00000167550.11	RHEBL1	23.6404	1.16946	0.442141	2.64498	0.00816947	0.0338049	chr12:49064676-49070025	-	10.1388	14.8934	18.556	30.3313	28.8703	39.0525
ENSG00000235829.1	TBCAP2	3.22149	-4.13708	1.56421	-2.64483	0.00817321	0.0338077	chr1:14692129-14692613	-	9.12492	5.31907	3.90653	0.978429	0	0
ENSG00000187288.12	CIDEC	5.6169	-2.92514	1.1061	-2.64457	0.00817952	0.0338275	chr3:9866711-9880255	-	3.04164	15.9572	10.743	1.95686	0	2.00269
ENSG00000146530.14	VWDE	17.9682	-1.37565	0.520194	-2.64449	0.00818148	0.0338292	chr7:12330885-12403941	-	31.4303	30.8506	15.6261	9.78429	12.1069	8.01077
ENSG00000207650.1	MIR570	26.0588	1.09221	0.413124	2.64378	0.00819854	0.0338934	chr3:195699401-195699497	+	13.1804	20.2125	16.6028	33.2666	40.046	33.0444
ENSG00000238228.1	OR7E7P	23.1642	-1.33222	0.504467	-2.64085	0.00826973	0.0341384	chr7:97946987-97947998	-	33.4581	31.9144	34.1822	21.5254	14.9008	3.00404
ENSG00000263563.6	UBBP4	32.9694	1.22021	0.46206	2.64081	0.0082709	0.0341384	chr17:22090743-22205154	+	7.09716	32.9783	19.5327	34.245	68.9163	35.0471
ENSG00000174332.5	GLIS1	9.61998	2.05373	0.777957	2.6399	0.00829301	0.0342135	chr1:53506237-53738106	-	8.11104	2.12763	0.976633	9.78429	17.6947	19.0256
ENSG00000183570.17	PCBP3	4.9181	-3.18085	1.20592	-2.6377	0.00834694	0.0344103	chr21:45643694-45942454	+	3.04164	12.7658	10.743	1.95686	0	1.00135
ENSG00000230131.6	LINC02641	34.2125	1.01721	0.385804	2.63661	0.00837383	0.0345083	chr10:123356450-123537767	+	26.3609	15.9572	25.3925	38.1587	36.3207	63.0848
ENSG00000273055.1	CTB-13F3.1	16.5226	1.39197	0.52833	2.63466	0.00842225	0.0346496	chr7:107942116-107942740	+	6.08328	8.51052	12.6962	24.4607	22.3512	25.0337
ENSG00000102935.12	ZNF423	12.6795	-1.74677	0.666165	-2.62213	0.0087381	0.0358088	chr16:49487524-49857919	-	17.236	28.723	12.6962	10.7627	4.65651	2.00269
ENSG00000143570.19	SLC39A1	29.5443	1.00872	0.385296	2.61804	0.00884358	0.0362008	chr1:153959099-153968184	-	22.3054	15.9572	20.5093	43.0509	35.3894	40.0538
ENSG00000132321.17	IQCA1	24.6805	1.17931	0.450838	2.61582	0.00890138	0.0364098	chr2:236324147-236507535	-	10.1388	10.6381	24.4158	37.1803	31.6642	34.0458
ENSG00000281128.2	PTENP1-AS	4.91811	3.11285	1.19085	2.61397	0.00894971	0.0365878	chr9:33676785-33688011	+	1.01388	1.06381	0.976633	3.91372	6.51911	16.0215
ENSG00000229321.2	AC008269.2	26.7384	-1.11533	0.427081	-2.61152	0.009014	0.0368019	chr2:206798325-206926876	+	28.3887	38.2973	42.9719	22.5039	10.2443	18.0242
ENSG00000114757.19	PEX5L	20.6764	1.20203	0.460503	2.61025	0.00904768	0.0369063	chr3:179794958-180037053	-	12.1666	11.702	13.6729	27.396	26.0764	33.0444
ENSG00000223117.1	RN7SKP296	17.3215	1.33177	0.510222	2.61018	0.00904952	0.0369069	chr3:190642163-190642503	+	9.12492	11.702	8.7897	23.4823	29.8016	21.0283
ENSG00000182366.11	FAM87A	3.34238	-4.19547	1.60752	-2.6099	0.00905677	0.0369297	chr8:375931-384079	-	11.1527	1.06381	6.83643	0	0	1.00135
ENSG00000183778.18	B3GALT5	27.8614	-1.06593	0.408508	-2.60932	0.00907215	0.0369787	chr21:39556442-39673137	+	40.5552	27.6592	44.9251	18.5901	21.4199	14.0188
ENSG00000287063.1	RP11-384P7.10	4.18198	3.51533	1.34866	2.60654	0.00914634	0.0372262	chr9:33706679-33710715	+	1.01388	0	0.976633	6.849	10.2443	6.00808
ENSG00000139209.16	SLC38A4	17.481	-1.31777	0.505626	-2.60622	0.00915477	0.0372536	chr12:46764761-46832408	-	24.3331	20.2125	30.2756	8.80586	10.2443	11.0148
ENSG00000235381.1	RP11-477D19.2	28.4824	-1.02977	0.395328	-2.60485	0.00919147	0.0373891	chr6:155253139-155256724	-	44.6107	32.9783	37.1121	14.6764	20.4886	21.0283
ENSG00000232400.1	RAD17P1	4.1862	-3.58355	1.37743	-2.60162	0.00927845	0.0376805	chr7:16864267-16866308	-	3.04164	7.4467	12.6962	0	0.931301	1.00135
ENSG00000136574.19	GATA4	4.06491	-3.53389	1.35845	-2.60142	0.00928391	0.0376957	chr8:11676959-11760002	+	5.0694	9.57433	7.81307	0	0.931301	1.00135
ENSG00000173535.15	TNFRSF10C	6.87402	2.25329	0.867291	2.59808	0.00937463	0.0379942	chr8:23102921-23117445	+	2.02776	3.19144	1.95327	11.7411	9.31301	13.0175
ENSG00000286333.1	RP3-514A23.4	14.6069	-1.55038	0.596887	-2.59744	0.00939219	0.0380514	chr14:72515407-72544622	-	32.4442	20.2125	12.6962	10.7627	6.51911	5.00673
ENSG00000173868.12	PHOSPHO1	5.95565	2.60818	1.00547	2.59401	0.00948644	0.0383839	chr17:49223366-49230787	-	3.04164	0	1.95327	7.82743	14.9008	8.01077
ENSG00000232564.3	MRTFA-AS1	12.994	-1.5866	0.612073	-2.59217	0.00953716	0.0385397	chr22:40521800-40526707	+	15.2082	27.6592	15.6261	8.80586	4.65651	6.00808
ENSG00000261048.1	RP11-810K23.9	8.6793	2.02354	0.781114	2.59058	0.00958135	0.0386687	chr15:20890206-20890606	-	2.02776	6.38289	1.95327	18.5901	12.1069	11.0148
ENSG00000205611.5	LINC01597	13.6796	-1.58709	0.612742	-2.59015	0.00959351	0.0387087	chr20:30278906-30289956	-	18.2498	14.8934	28.3224	8.80586	2.7939	9.01211
ENSG00000204347.4	BTBD17	4.0192	-3.51996	1.36107	-2.58616	0.00970506	0.0390751	chr17:74356416-74361868	-	7.09716	5.31907	9.76633	0	0.931301	1.00135
ENSG00000259269.2	RP11-624L4.2	3.19404	4.05918	1.57274	2.58095	0.00985278	0.0395904	chr15:39472703-39497074	+	0	0	0.976633	5.87057	9.31301	3.00404
ENSG00000135898.10	GPR55	15.2797	-1.3972	0.541411	-2.58066	0.00986118	0.039617	chr2:230907318-230961066	-	22.3054	26.5954	17.5794	8.80586	8.38171	8.01077
ENSG00000244125.1	AC078882.1	32.8996	-1.0288	0.398688	-2.58045	0.00986709	0.0396263	chr2:142131178-142137830	-	25.347	56.3822	50.7849	25.4392	21.4199	18.0242
ENSG00000233860.2	SHROOM3-AS1	29.963	-1.01514	0.393574	-2.57928	0.00990051	0.0397461	chr4:76708853-76802426	-	36.4997	43.6164	40.042	20.547	13.0382	26.035
ENSG00000204620.3	RP11-1148L6.9	15.5199	-1.43026	0.555012	-2.57699	0.00996641	0.039941	chrX:48568014-48574860	-	31.4303	15.9572	20.5093	10.7627	7.45041	7.00942
ENSG00000285215.2	CH17-118O6.7	6.37147	2.38812	0.927701	2.57423	0.0100464	0.0402073	chr1:120963645-120977585	+	1.01388	3.19144	1.95327	14.6764	8.38171	9.01211
ENSG00000145911.6	N4BP3	7.25845	2.38921	0.928333	2.57366	0.0100629	0.0402516	chr5:178113532-178126081	+	1.01388	0	5.8598	7.82743	15.8321	13.0175
ENSG00000154928.19	EPHB1	5.35412	-2.84774	1.10768	-2.57091	0.0101432	0.0405507	chr3:134795260-135260467	+	5.0694	7.4467	15.6261	0.978429	0	3.00404
ENSG00000173237.5	C11orf86	5.70551	-2.62356	1.02066	-2.57046	0.0101563	0.0405886	chr11:66975277-66977009	+	9.12492	10.6381	9.76633	0.978429	3.7252	0
ENSG00000275120.3	RP11-182J1.18	6.73471	-2.32711	0.905413	-2.57022	0.0101634	0.040602	chr15:84597809-84633988	-	11.1527	13.8296	8.7897	0.978429	4.65651	1.00135
ENSG00000127152.18	BCL11B	9.17684	1.96626	0.766376	2.56566	0.0102979	0.0410578	chr14:99169287-99272197	-	6.08328	3.19144	1.95327	22.5039	9.31301	12.0162
ENSG00000241472.7	PTPRG-AS1	15.5067	-1.42439	0.555811	-2.56272	0.0103856	0.0413253	chr3:62221249-62369406	-	24.3331	17.021	26.3691	12.7196	5.58781	7.00942
ENSG00000228842.3	PCDH9-AS2	5.72666	2.51667	0.98245	2.56163	0.0104183	0.0414329	chr13:66825169-66915031	+	2.02776	2.12763	0.976633	10.7627	7.45041	11.0148
ENSG00000106341.11	PPP1R17	28.3143	-1.06051	0.414356	-2.55941	0.0104849	0.0416304	chr7:31687215-31708455	+	47.6524	34.0421	33.2055	23.4823	20.4886	11.0148
ENSG00000002746.15	HECW1	17.5504	1.29818	0.507398	2.5585	0.0105124	0.0417245	chr7:43112629-43566001	+	8.11104	9.57433	12.6962	27.396	20.4886	27.0363
ENSG00000185924.7	RTN4RL1	11.9186	-1.63352	0.638576	-2.55806	0.0105257	0.0417661	chr17:1934677-2025334	-	14.1943	22.3401	17.5794	8.80586	5.58781	3.00404
ENSG00000106852.15	LHX6	5.70205	-2.60436	1.01952	-2.55449	0.0106342	0.0421474	chr9:122202577-122229626	-	17.236	5.31907	6.83643	1.95686	1.8626	1.00135
ENSG00000287910.1	RP11-416I2.3	12.2017	1.59022	0.622643	2.55398	0.0106499	0.042202	chr17:17033531-17042305	-	4.05552	6.38289	7.81307	15.6549	23.2825	16.0215
ENSG00000109667.12	SLC2A9	8.99939	-1.87049	0.732932	-2.55206	0.0107089	0.0424128	chr4:9771153-10054936	-	16.2221	9.57433	16.6028	2.93529	4.65651	4.00538
ENSG00000234279.2	LINC01937	3.02106	-4.04076	1.58427	-2.55056	0.010755	0.0425345	chr2:238554541-238740849	+	7.09716	3.19144	6.83643	0	0	1.00135
ENSG00000216802.1	RP11-390P2.2	8.58049	-1.94793	0.764368	-2.54842	0.0108211	0.0427728	chr6:138650226-138650973	-	11.1527	18.0848	11.7196	2.93529	5.58781	2.00269
ENSG00000164362.21	TERT	4.0392	-3.50828	1.37721	-2.54738	0.0108535	0.0428858	chr5:1253147-1295068	-	6.08328	6.38289	9.76633	0	0	2.00269
ENSG00000262202.4	RP11-160E2.6	27.0441	1.31005	0.514354	2.54698	0.0108658	0.0429267	chr17:19112000-19112636	-	11.1527	30.8506	4.88317	53.8136	33.5268	28.0377
ENSG00000281571.2	CH17-195P21.2	5.4695	2.83084	1.11168	2.54646	0.0108821	0.0429832	chr1:145214851-145215938	+	1.01388	1.06381	1.95327	14.6764	12.1069	2.00269
ENSG00000183780.13	SLC35F3	14.7188	-1.58296	0.62172	-2.54611	0.0108932	0.0430152	chr1:233904676-234324511	+	29.4025	8.51052	28.3224	7.82743	10.2443	4.00538
ENSG00000239486.1	RP11-163E9.1	16.28	-1.37519	0.540123	-2.54608	0.0108941	0.0430152	chr7:102380465-102382737	-	21.2915	28.723	20.5093	13.698	7.45041	6.00808
ENSG00000172901.20	LVRN	25.4082	1.09894	0.431835	2.54481	0.0109338	0.0431588	chr5:115962454-116027619	+	12.1666	12.7658	23.4392	35.2234	29.8016	39.0525
ENSG00000226243.1	RPL37AP1	16.3197	-1.37388	0.539879	-2.54479	0.0109344	0.0431588	chr20:44466564-44466842	-	22.3054	29.7868	18.556	5.87057	8.38171	13.0175
ENSG00000144671.11	SLC22A14	4.72805	3.06085	1.20293	2.5445	0.0109434	0.0431868	chr3:38282294-38318575	+	2.02776	0	0.976633	13.698	4.65651	7.00942
ENSG00000112539.15	C6orf118	11.1447	1.63455	0.642891	2.54249	0.0110065	0.0433813	chr6:165279664-165309605	-	6.08328	5.31907	4.88317	15.6549	14.9008	20.0269
ENSG00000286742.1	CTB-85C5.2	28.4276	1.0933	0.430004	2.54252	0.0110055	0.0433813	chr7:92647906-92667083	+	12.1666	28.723	13.6729	42.0724	28.8703	45.0606
ENSG00000106565.18	TMEM176B	8.09668	-2.00236	0.787581	-2.54242	0.0110087	0.0433824	chr7:150791285-150801360	-	15.2082	14.8934	8.7897	4.89214	2.7939	2.00269
ENSG00000166126.11	AMN	6.39339	2.38766	0.940926	2.53756	0.0111628	0.0439426	chr14:102922663-102933596	+	2.02776	3.19144	0.976633	16.6333	6.51911	9.01211
ENSG00000265717.1	RP11-94B19.7	3.10654	-4.07683	1.60721	-2.5366	0.0111936	0.0440324	chr18:76254292-76255214	-	5.0694	10.6381	1.95327	0.978429	0	0
ENSG00000228824.7	MIR4500HG	3.08027	3.99731	1.57637	2.53577	0.0112199	0.0441123	chr13:87427214-87674235	-	1.01388	0	0	8.80586	4.65651	4.00538
ENSG00000285664.2	RP11-589M4.5	5.6979	-2.5993	1.02566	-2.53427	0.0112681	0.044279	chr14:52791756-52930185	+	11.1527	7.4467	10.743	3.91372	0.931301	0
ENSG00000241231.2	RP11-275H4.1	14.2107	1.48733	0.587037	2.53362	0.0112893	0.0443534	chr3:181372732-181442597	-	12.1666	6.38289	3.90653	19.5686	24.2138	19.0256
ENSG00000125245.14	GPR18	10.2172	-1.93344	0.763251	-2.53317	0.0113037	0.044384	chr13:99254732-99261744	-	20.2776	23.4039	4.88317	2.93529	2.7939	7.00942
ENSG00000247809.9	NR2F2-AS1	23.3023	-1.27296	0.502663	-2.53243	0.0113274	0.0444556	chr15:96110040-96327361	-	49.6801	14.8934	34.1822	12.7196	9.31301	19.0256
ENSG00000287574.1	RP5-971C3.1	26.665	1.07446	0.42481	2.52926	0.0114303	0.0447721	chr7:44582519-44583676	+	14.1943	12.7658	24.4158	28.3744	38.1833	42.0565
ENSG00000266946.1	MRPL37P1	18.0619	-1.24926	0.494656	-2.5255	0.0115533	0.0451656	chr18:58690356-58692153	+	24.3331	25.5316	26.3691	8.80586	9.31301	14.0188
ENSG00000103710.11	RASL12	3.09698	4.0065	1.58903	2.52135	0.0116905	0.0456214	chr15:65053337-65076690	-	0	0	0.976633	2.93529	4.65651	10.0135
ENSG00000287822.1	RP11-597D13.11	13.4851	-1.48683	0.589894	-2.5205	0.0117189	0.0457159	chr4:158178168-158182806	-	14.1943	18.0848	27.3457	7.82743	7.45041	6.00808
ENSG00000141506.15	PIK3R5	8.8528	-1.83515	0.728557	-2.51888	0.0117728	0.0458857	chr17:8878911-8965712	-	15.2082	10.6381	15.6261	3.91372	3.7252	4.00538
ENSG00000163017.14	ACTG2	3.00653	-4.03471	1.60228	-2.5181	0.0117989	0.045963	chr2:73892314-73919865	+	7.09716	2.12763	7.81307	0	0	1.00135
ENSG00000230732.4	AC127904.2	21.1957	1.25137	0.497018	2.51776	0.0118104	0.0459834	chr3:196912646-196914579	+	20.2776	8.51052	8.7897	39.1372	21.4199	29.039
ENSG00000272620.2	AFAP1-AS1	25.9179	-1.07089	0.42563	-2.51601	0.0118693	0.0461721	chr4:7754077-7778928	+	26.3609	35.1059	43.9485	15.6549	21.4199	13.0175
ENSG00000238755.3	LINC02006	5.02295	2.68754	1.0688	2.51455	0.0119186	0.0463148	chr3:153384934-153980186	-	1.01388	1.06381	1.95327	9.78429	9.31301	7.00942
ENSG00000267107.8	PCAT19	5.04453	-2.76901	1.10117	-2.51461	0.0119166	0.0463148	chr19:41449520-41501223	-	6.08328	9.57433	10.743	2.93529	0.931301	0
ENSG00000125508.4	SRMS	10.1282	1.71704	0.683006	2.51394	0.011939	0.0463698	chr20:63538489-63547749	-	5.0694	3.19144	5.8598	18.5901	13.0382	15.0202
ENSG00000165495.16	PKNOX2	10.3768	1.74361	0.693977	2.51249	0.0119883	0.0465446	chr11:125164687-125433389	+	6.08328	5.31907	2.9299	15.6549	10.2443	22.0296
ENSG00000255443.1	CD44-AS1	26.8003	-1.04153	0.41517	-2.50869	0.012118	0.0469988	chr11:35210343-35214985	-	34.4719	41.4888	32.2289	23.4823	12.1069	17.0229
ENSG00000176919.13	C8G	11.0805	1.74195	0.694984	2.50646	0.0121948	0.0472383	chr9:136945185-136946975	+	7.09716	5.31907	2.9299	7.82743	23.2825	20.0269
ENSG00000183668.18	PSG9	4.63832	-3.08786	1.2332	-2.50395	0.0122816	0.0475328	chr19:43211791-43269530	-	4.05552	15.9572	4.88317	0	0.931301	2.00269
ENSG00000177688.7	SUMO4	17.2926	-1.2934	0.516898	-2.50223	0.0123415	0.047723	chr6:149400262-149401278	+	25.347	17.021	31.2523	8.80586	9.31301	12.0162
ENSG00000224418.1	STK24-AS1	6.51519	-2.26359	0.905427	-2.50002	0.0124186	0.0479624	chr13:98577244-98578830	+	7.09716	10.6381	14.6495	0.978429	3.7252	2.00269
ENSG00000276545.1	PCDHGB9P	15.7897	1.3558	0.542558	2.4989	0.012458	0.0480892	chr5:141439853-141442449	+	9.12492	11.702	5.8598	27.396	18.626	22.0296
ENSG00000279713.1	CTD-3035K23.3	21.3835	1.20792	0.484068	2.49535	0.0125834	0.0485139	chr17:62679403-62681354	-	10.1388	17.021	11.7196	20.547	42.8399	26.035
ENSG00000058335.16	RASGRF1	4.28902	-3.59526	1.44258	-2.49224	0.0126941	0.0488128	chr15:78959906-79090780	-	13.1804	9.57433	0.976633	0	0	2.00269
ENSG00000206145.8	P2RX6P	4.428	-3.02015	1.2118	-2.49229	0.0126923	0.0488128	chr22:21035243-21045017	-	11.1527	9.57433	2.9299	0.978429	0.931301	1.00135
ENSG00000287071.1	CDRT15P4	7.83828	2.06951	0.831088	2.49012	0.0127701	0.0490796	chr2:131758031-131767221	+	2.02776	1.06381	5.8598	14.6764	8.38171	15.0202
ENSG00000260788.6	RP11-298D21.1	6.18487	2.36291	0.950327	2.48642	0.0129036	0.0494892	chr16:83720402-83772974	-	3.04164	0	2.9299	11.7411	8.38171	11.0148

## Sheet: Filtered_DEGs_DAPT_vs_Ctrl
GeneID	GeneSymbol	baseMean	log2FoldChange	lfcSE	stat	pvalue	padj	Chromosome	Strand	CPM_Par_1	CPM_Par_2	CPM_Par_3	CPM_DAPT_1	CPM_DAPT_2	CPM_DAPT_3
ENSG00000179826.8	MRGPRX3	7.81422	-5.91136	1.25467	-4.71149	2.46e-06	2.81e-05	chr11:18120955-18138488	+	12.8732	17.3178	16.3499	0	0.344464	0
ENSG00000164116.17	GUCY1A1	10.8621	-5.02879	1.01827	-4.93858	7.87e-07	9.67e-06	chr4:155666726-155737059	+	25.7463	12.1225	25.4332	0	0.688928	1.18141
ENSG00000268104.3	SLC6A14	147.321	-4.65397	0.284607	-16.3523	4.19e-60	1.29e-57	chrX:116436606-116461458	+	238.869	242.449	368.782	18.7668	10.3339	4.72564
ENSG00000081041.9	CXCL2	143.929	-4.39675	0.286602	-15.341	4.07e-53	9.69e-51	chr4:74097040-74099196	-	270.336	192.228	365.148	9.38338	15.8454	10.6327
ENSG00000115902.11	SLC1A4	4012.54	-4.3788	0.239583	-18.2767	1.27e-74	5.33e-72	chr2:64988477-65023865	+	6452.32	6402.39	10117	332.589	379.944	391.047
ENSG00000069018.19	TRPC7	18.2041	-4.34968	0.706165	-6.15959	7.29e-10	1.32e-08	chr5:136212745-136365545	-	28.607	25.1108	49.0498	1.0426	0.688928	4.72564
ENSG00000134827.8	TCN1	15.3667	-4.15167	0.741017	-5.60267	2.11e-08	3.24e-07	chr11:59852800-59866489	-	32.8981	13.8542	39.9665	2.0852	1.03339	2.36282
ENSG00000249669.10	CARMN	13.5751	-4.14749	0.739821	-5.60607	2.07e-08	3.19e-07	chr5:149406689-149432835	+	28.607	21.6473	27.2499	1.0426	1.72232	1.18141
ENSG00000152822.14	GRM1	56.4283	-4.06153	0.377413	-10.7615	5.23e-27	3.52e-25	chr6:146027646-146437601	+	92.9728	95.2479	128.983	6.25559	4.47803	10.6327
ENSG00000124102.5	PI3	7.57871	-3.97452	0.973901	-4.08103	4.48e-05	0.000392386	chr20:45174902-45176544	+	15.7339	8.6589	18.1666	1.0426	0.688928	1.18141
ENSG00000148677.7	ANKRD1	1050.23	-3.91488	0.251224	-15.5832	9.47e-55	2.43e-52	chr10:90912096-90921087	-	1554.79	1981.16	2376.19	100.089	153.287	135.862
ENSG00000136928.7	GABBR2	738.878	-3.88617	0.136347	-28.5021	1.1e-178	3.11e-175	chr9:98288109-98708935	-	1278.73	1241.69	1631.36	75.0671	93.0053	113.415
ENSG00000198435.4	NRARP	101.966	-3.82892	0.293887	-13.0285	8.42e-39	1.07e-36	chr9:137299631-137302271	-	178.794	145.47	250.699	13.5538	16.1898	7.08846
ENSG00000117152.14	RGS4	24718.6	-3.81566	0.0940294	-40.5795	0	0	chr1:163068775-163076802	+	41322.9	48752.2	48421.2	3138.22	3812.18	2864.92
ENSG00000166535.20	A2ML1	11.5401	-3.62647	0.742376	-4.88495	1.03e-06	1.25e-05	chr12:8822621-8887001	+	18.5946	16.4519	29.0665	1.0426	1.72232	2.36282
ENSG00000264230.9	ANXA8L1	9.27123	-3.55577	0.829553	-4.28636	1.82e-05	0.000173534	chr10:46375627-46391784	+	11.4428	12.9884	27.2499	1.0426	1.72232	1.18141
ENSG00000265190.7	ANXA8	30.612	-3.54809	0.462974	-7.6637	1.81e-14	5.27e-13	chr10:47460162-47484158	-	60.0748	47.624	59.9497	3.12779	3.44464	9.45128
ENSG00000163331.12	DAPL1	27.3008	-3.45647	0.501634	-6.89042	5.56e-12	1.3e-10	chr2:158795317-158862781	+	31.4677	43.2945	76.2996	5.21299	5.16696	2.36282
ENSG00000183570.17	PCBP3	7.48999	-3.42975	0.94342	-3.63544	0.000277506	0.0020348	chr21:45643694-45942454	+	17.1642	4.32945	19.9832	2.0852	1.37786	0
ENSG00000108691.9	CCL2	472.73	-3.40442	0.144279	-23.596	4.23e-123	4.65e-120	chr17:34255218-34257203	+	702.303	926.502	964.645	84.4504	84.0492	74.4288
ENSG00000165694.10	FRMD7	39.15	-3.37744	0.392225	-8.61099	7.24e-18	2.78e-16	chrX:132076990-132128020	-	75.8086	69.2712	70.8497	8.34078	8.26714	2.36282
ENSG00000116745.7	RPE65	30.7494	-3.35338	0.466898	-7.18225	6.86e-13	1.75e-11	chr1:68428822-68449954	-	48.6319	47.624	74.483	3.12779	8.26714	2.36282
ENSG00000099998.19	GGT5	383.318	-3.28925	0.152893	-21.5135	1.16e-102	8.85e-100	chr22:24219654-24245108	-	627.924	716.091	739.38	51.0873	68.5484	96.8756
ENSG00000286288.1	RP5-968J1.1	39.267	-3.28536	0.402011	-8.17233	3.02e-16	1.01e-14	chr20:1729038-1817765	-	77.239	51.0875	87.1996	5.21299	8.95607	5.90705
ENSG00000163734.4	CXCL3	41.9107	-3.22537	0.392904	-8.20907	2.23e-16	7.58e-15	chr4:74036589-74038807	-	77.239	56.2829	96.2829	6.25559	10.6784	4.72564
ENSG00000260423.2	LINC02367	6.54026	-3.21572	0.922256	-3.4868	0.000488833	0.00333903	chr12:9347056-9400387	+	11.4428	9.52479	14.5333	0	1.37786	2.36282
ENSG00000197921.6	HES5	5.60356	-3.1902	1.1227	-2.84156	0.00448938	0.0225737	chr1:2528745-2530263	-	7.15176	2.59767	19.9832	0	0.344464	3.54423
ENSG00000196136.18	SERPINA3	14.986	-3.17319	0.610462	-5.19802	2.01e-07	2.71e-06	chr14:94612384-94624055	+	21.4553	37.2333	21.7999	3.12779	2.75571	3.54423
ENSG00000099994.11	SUSD2	193.196	-3.06406	0.190255	-16.105	2.35e-58	7.05e-56	chr22:24181487-24189106	+	314.677	318.648	405.115	29.1927	45.4693	46.075
ENSG00000128262.8	POM121L9P	52.9636	-2.97148	0.325884	-9.11821	7.64e-20	3.32e-18	chr22:24251828-24265525	+	85.8211	92.6502	101.733	8.34078	10.3339	18.9026
ENSG00000163762.7	TM4SF18	73.737	-2.93126	0.29103	-10.072	7.35e-24	4.12e-22	chr3:149318498-149334414	-	151.617	116.895	123.533	26.065	17.2232	7.08846
ENSG00000148053.17	NTRK2	290.559	-2.88255	0.438819	-6.56888	5.07e-11	1.05e-09	chr9:84668551-85027054	+	480.598	324.709	728.48	84.4504	44.7803	80.3359
ENSG00000144152.13	FBLN7	38.655	-2.87947	0.396555	-7.26121	3.84e-13	9.96e-12	chr2:112138385-112188218	+	58.6444	63.21	85.3829	4.17039	13.4341	7.08846
ENSG00000188488.14	SERPINA5	1960.57	-2.87547	0.0923239	-31.1455	5.84e-213	3.85e-209	chr14:94561442-94593118	+	3407.1	3291.25	3655.12	543.194	459.171	407.586
ENSG00000188290.11	HES4	113.58	-2.85283	0.235416	-12.1182	8.46e-34	8.66e-32	chr1:998962-1000172	-	244.59	182.703	174.399	29.1927	31.6907	18.9026
ENSG00000129009.13	ISLR	148.122	-2.79652	0.198081	-14.1181	2.94e-45	5.28e-43	chr15:74173710-74176872	+	253.172	238.12	283.399	45.8743	32.7241	35.4423
ENSG00000114315.4	HES1	97.5982	-2.77202	0.234912	-11.8002	3.89e-32	3.66e-30	chr3:194136148-194138732	+	157.339	167.983	187.116	18.7668	27.2127	27.1724
ENSG00000173467.9	AGR3	159.463	-2.74019	0.191038	-14.3437	1.17e-46	2.22e-44	chr7:16859412-16881987	-	247.451	265.828	317.915	37.5335	39.6134	48.4378
ENSG00000173334.4	TRIB1	1447.48	-2.72081	0.120634	-22.5543	1.22e-112	1.15e-109	chr8:125430358-125438403	+	2237.07	2253.05	3053.8	320.078	394.411	426.489
ENSG00000147869.5	CER1	6.45021	-2.72034	0.896838	-3.03326	0.00241931	0.0133318	chr9:14719724-14722733	-	14.3035	12.9884	7.26663	1.0426	3.10018	0
ENSG00000117525.14	F3	581.147	-2.71919	0.120492	-22.5674	9.06e-113	8.96e-110	chr1:94529173-94541759	-	944.032	918.709	1166.29	156.39	152.598	148.858
ENSG00000118777.12	ABCG2	21.0022	-2.71853	0.528237	-5.14643	2.65e-07	3.51e-06	chr4:88090150-88231628	-	25.7463	24.2449	59.9497	3.12779	5.85589	7.08846
ENSG00000273259.3	RP11-986E7.7	5.05596	-2.68119	1.01102	-2.65195	0.00800282	0.036634	chr14:94592058-94624646	+	8.58211	6.06123	10.8999	2.0852	0.344464	2.36282
ENSG00000179796.12	LRRC3B	4.93144	-2.68105	0.981307	-2.73212	0.00629276	0.0299209	chr3:26622806-26717537	+	8.58211	11.2566	5.44997	2.0852	1.03339	1.18141
ENSG00000108231.14	LGI1	464.306	-2.65341	0.137511	-19.296	5.8e-83	3.02e-80	chr10:93757840-93806272	+	673.696	782.765	951.929	125.112	135.374	116.96
ENSG00000130066.17	SAT1	14773.8	-2.64484	0.211041	-12.5323	4.97e-36	5.64e-34	chrX:23783173-23786210	+	20813	22771.2	32839.7	4135.99	4027.13	4055.78
ENSG00000103740.10	ACSBG1	103.399	-2.64334	0.241247	-10.957	6.15e-28	4.23e-26	chr15:78167468-78245688	-	138.744	193.959	205.282	25.0224	33.7575	23.6282
ENSG00000121207.12	LRAT	4.93903	-2.64185	0.979918	-2.69599	0.00701808	0.0328092	chr4:154626945-154753120	+	5.72141	10.3907	9.08329	1.0426	1.03339	2.36282
ENSG00000253633.2	KB-1980E6.3	7.39574	-2.63977	0.851895	-3.0987	0.0019437	0.0110626	chr8:102528740-102539943	+	18.5946	6.06123	14.5333	2.0852	3.10018	0
ENSG00000164199.18	ADGRV1	84.5303	-2.63758	0.251125	-10.503	8.37e-26	5.17e-24	chr5:90529344-91164437	+	147.326	135.079	152.599	31.2779	19.6345	21.2654
ENSG00000271239.1	RP11-238F2.1	19.2415	-2.62861	0.500449	-5.2525	1.5e-07	2.06e-06	chr17:70778604-70779230	-	34.3284	32.9038	32.6998	7.29819	5.85589	2.36282
ENSG00000196415.10	PRTN3	15.57	-2.58048	0.567961	-4.54342	5.53e-06	5.88e-05	chr19:840999-848175	+	30.0374	19.0496	30.8832	7.29819	3.78911	2.36282
ENSG00000185985.11	SLITRK2	321.83	-2.56738	0.308741	-8.31564	9.13e-17	3.19e-15	chrX:145817829-145829856	+	497.762	419.957	733.93	76.1097	85.0826	118.141
ENSG00000117595.12	IRF6	34.3131	-2.54788	0.378673	-6.72844	1.71e-11	3.78e-10	chr1:209785617-209806175	-	47.2016	56.2829	72.6663	11.4686	9.98946	8.26987
ENSG00000280587.1	LINC01348	7.40602	-2.53958	0.804127	-3.15818	0.00158756	0.00931743	chr1:235065479-235074220	-	15.7339	7.79301	14.5333	3.12779	2.06678	1.18141
ENSG00000105246.6	EBI3	5.86784	-2.52425	0.949416	-2.65874	0.00784327	0.0360444	chr19:4229523-4237528	+	14.3035	6.06123	9.08329	0	1.03339	4.72564
ENSG00000160963.14	COL26A1	86.627	-2.50871	0.236346	-10.6146	2.55e-26	1.64e-24	chr7:101362875-101559024	+	148.757	143.738	150.783	22.9372	27.5571	25.991
ENSG00000101670.12	LIPG	477.331	-2.50204	0.128931	-19.4061	6.85e-84	3.66e-81	chr18:49560699-49599185	+	733.77	757.654	941.029	158.475	133.652	139.406
ENSG00000078549.15	ADCYAP1R1	5.15506	-2.49067	0.962126	-2.58871	0.00963348	0.0426784	chr7:31052308-31111479	+	12.8732	4.32945	9.08329	2.0852	1.37786	1.18141
ENSG00000065833.9	ME1	5.70734	-2.43631	0.935769	-2.60354	0.00922675	0.0411301	chr6:83210402-83431051	-	11.4428	12.9884	3.63332	3.12779	0.688928	2.36282
ENSG00000102760.13	RGCC	95.4165	-2.43076	0.230843	-10.53	6.29e-26	3.92e-24	chr13:41457550-41470871	+	167.351	145.47	168.949	25.0224	27.9016	37.8051
ENSG00000164265.9	SCGB3A2	13.5753	-2.42552	0.581477	-4.17131	3.03e-05	0.000274655	chr5:147870682-147882191	+	18.5946	26.8426	23.6166	5.21299	4.8225	2.36282
ENSG00000235750.10	KIAA0040	68.4306	-2.3794	0.280296	-8.48888	2.09e-17	7.68e-16	chr1:175156986-175192999	-	91.5425	105.639	147.149	17.7242	21.3568	27.1724
ENSG00000163435.16	ELF3	68.2148	-2.33852	0.27745	-8.42862	3.5e-17	1.28e-15	chr1:202007945-202017183	+	138.744	90.0526	112.633	27.1075	20.6678	20.084
ENSG00000061918.14	GUCY1B1	189.5	-2.33677	0.178795	-13.0695	4.92e-39	6.31e-37	chr4:155758992-155807811	+	261.754	316.05	368.782	61.5133	56.8366	72.066
ENSG00000134013.16	LOXL2	632.924	-2.33257	0.370147	-6.30173	2.94e-10	5.57e-09	chr8:23296897-23425328	-	1241.55	769.776	1157.21	298.183	186.7	144.132
ENSG00000146250.7	PRSS35	231.533	-2.33206	0.394039	-5.91833	3.25e-09	5.52e-08	chr6:83512534-83525704	+	449.13	340.295	368.782	120.941	59.2478	50.8006
ENSG00000074181.9	NOTCH3	391.407	-2.32261	0.14971	-15.514	2.79e-54	6.89e-52	chr19:15159038-15200995	-	620.773	532.522	806.596	139.708	129.519	119.322
ENSG00000223485.4	LINC01615	41.9393	-2.32164	0.347253	-6.68572	2.3e-11	5e-10	chr6:169157162-169162992	-	71.5176	66.6735	74.483	9.38338	18.9455	10.6327
ENSG00000141639.12	MAPK4	267.855	-2.30876	0.1474	-15.6632	2.7e-55	7.21e-53	chr18:50560087-50731826	+	431.966	405.237	501.398	96.9616	88.8717	82.6987
ENSG00000104140.7	RHOV	70.201	-2.2978	0.259406	-8.85792	8.15e-19	3.38e-17	chr15:40872214-40874234	-	124.441	111.7	112.633	20.852	22.0457	29.5352
ENSG00000230712.3	GGTLC4P	9.98438	-2.29602	0.678304	-3.38495	0.000711921	0.0046384	chr22:24248074-24249466	-	12.8732	20.7814	16.3499	1.0426	4.13357	4.72564
ENSG00000267579.1	RP11-126O1.2	6.19261	-2.28841	0.843191	-2.71399	0.00664788	0.0313754	chr18:58557070-58566677	+	10.0125	13.8542	7.26663	2.0852	2.75571	1.18141
ENSG00000203883.7	SOX18	5.88686	-2.2869	0.886406	-2.57997	0.00988099	0.0436039	chr20:64047582-64049639	-	11.4428	7.79301	10.8999	2.0852	3.10018	0
ENSG00000143603.19	KCNN3	52.5497	-2.28649	0.310073	-7.37405	1.66e-13	4.39e-12	chr1:154697455-154870281	-	75.8086	72.7348	114.449	15.639	18.9455	17.7211
ENSG00000104055.16	TGM5	142.283	-2.28215	0.221579	-10.2995	7.08e-25	4.15e-23	chr15:43232590-43266928	-	261.754	265.828	185.299	46.9169	62.0035	31.8981
ENSG00000172201.12	ID4	4778	-2.27354	0.0844738	-26.9142	1.5e-159	3.29e-156	chr6:19837370-19842197	+	7566.56	7455.31	8727.22	1816.21	1510.13	1592.54
ENSG00000167131.17	CCDC103	18.7831	-2.27001	0.538561	-4.21495	2.5e-05	0.000231461	chr17:44899142-44905390	+	17.1642	29.4403	45.4164	6.25559	3.78911	10.6327
ENSG00000265112.1	MIR3153	8.03962	-2.26675	0.755899	-2.99875	0.00271091	0.014633	chr9:89312225-89312306	+	20.0249	10.3907	9.08329	3.12779	2.06678	3.54423
ENSG00000205336.14	ADGRG1	2390.58	-2.26271	0.218065	-10.3763	3.18e-25	1.91e-23	chr16:57610652-57665580	+	3458.59	3943.26	4467.16	647.453	801.568	1025.46
ENSG00000288648.1	RP11-34M7.1	13.7215	-2.24123	0.582505	-3.84758	0.000119292	0.000960992	chr6:164228331-164231610	+	17.1642	22.5131	27.2499	5.21299	3.10018	7.08846
ENSG00000135925.9	WNT10A	9.87501	-2.23182	0.673542	-3.31356	0.000921161	0.00579346	chr2:218880852-218899581	+	11.4428	20.7814	16.3499	5.21299	3.10018	2.36282
ENSG00000276851.1	RP5-875H18.9	78.8617	-2.21975	0.245279	-9.04987	1.43e-19	6.18e-18	chr17:50094065-50094647	+	138.744	142.006	108.999	28.1501	29.2795	25.991
ENSG00000204869.8	IGFL4	103.281	-2.2084	0.221186	-9.98436	1.78e-23	9.74e-22	chr19:46039748-46077118	-	161.63	193.959	154.416	42.7465	38.58	28.3538
ENSG00000240541.3	TM4SF1-AS1	6.10843	-2.20636	0.838295	-2.63196	0.00848945	0.0384418	chr3:149377778-149386583	+	11.4428	7.79301	10.8999	2.0852	2.06678	2.36282
ENSG00000225217.1	HSPA7	15.3194	-2.2055	0.545791	-4.04092	5.32e-05	0.000459029	chr1:161606291-161608217	+	30.0374	19.0496	27.2499	3.12779	6.54482	5.90705
ENSG00000123104.12	ITPR2	2171.02	-2.20463	0.0978598	-22.5284	2.19e-112	1.96e-109	chr12:26335352-26833194	-	3276.94	3254.01	4172.86	834.078	739.22	749.014
ENSG00000116774.12	OLFML3	50.058	-2.20413	0.314058	-7.01823	2.25e-12	5.44e-11	chr1:113979391-114035572	+	84.3907	76.1983	89.0162	11.4686	22.7346	16.5397
ENSG00000065371.17	ROPN1	6.10887	-2.20395	0.871396	-2.52922	0.0114317	0.0490453	chr3:123968521-123992178	-	17.1642	6.06123	7.26663	1.0426	2.75571	2.36282
ENSG00000280660.1	RP11-437J2.3	49.6621	-2.20305	0.329211	-6.69191	2.2e-11	4.79e-10	chr10:93762453-93771991	+	65.7962	93.5161	85.3829	8.34078	18.9455	25.991
ENSG00000167614.14	TTYH1	4036.17	-2.19335	0.0727337	-30.1559	8.98e-200	4.44e-196	chr19:54415219-54436904	+	6688.32	6151.28	7037.73	1379.36	1472.93	1487.4
ENSG00000187527.11	ATP13A5	7.28102	-2.19095	0.785165	-2.79043	0.00526387	0.0258241	chr3:193274789-193378820	-	8.58211	13.8542	12.7166	2.0852	1.72232	4.72564
ENSG00000175445.17	LPL	26.017	-2.18639	0.41745	-5.2375	1.63e-07	2.22e-06	chr8:19901717-19967259	+	44.3409	38.9651	43.5998	12.5112	7.23375	9.45128
ENSG00000123358.20	NR4A1	14.4073	-2.17647	0.590421	-3.68631	0.000227531	0.00170119	chr12:52022832-52059507	+	30.0374	15.586	25.4332	9.38338	4.8225	1.18141
ENSG00000186007.10	LEMD1	233.171	-2.17413	0.182063	-11.9416	7.18e-33	7.1e-31	chr1:205381378-205455954	-	343.284	315.184	485.048	76.1097	75.4376	103.964
ENSG00000163520.14	FBLN2	11.098	-2.16375	0.647975	-3.33926	0.000840028	0.0053565	chr3:13549125-13638422	+	24.316	20.7814	9.08329	6.25559	3.78911	2.36282
ENSG00000158710.15	TAGLN2	4026.42	-2.15275	0.075183	-28.6335	2.57e-180	8.47e-177	chr1:159918107-159925507	-	6284.96	6249.13	7193.97	1409.59	1503.93	1516.93
ENSG00000207729.3	MIR556	8.20587	-2.14921	0.799593	-2.68788	0.00719063	0.0334575	chr1:162342546-162342640	+	8.58211	11.2566	21.7999	2.0852	5.51143	0
ENSG00000204950.4	LRRC10B	12.077	-2.14624	0.625563	-3.43089	0.000601612	0.00400825	chr11:61508749-61511018	+	17.1642	31.172	10.8999	4.17039	5.51143	3.54423
ENSG00000183484.12	GPR132	11.3679	-2.1392	0.661489	-3.23391	0.00122106	0.00742899	chr14:105049395-105065445	-	17.1642	18.1837	21.7999	4.17039	6.88928	0
ENSG00000105642.16	KCNN1	12.1807	-2.11749	0.594272	-3.56317	0.000366402	0.00260168	chr19:17951293-18000085	+	22.8856	19.9155	16.3499	6.25559	4.13357	3.54423
ENSG00000183722.9	LHFPL6	3162.03	-2.10562	0.0783242	-26.8833	3.44e-159	6.8e-156	chr13:39209116-39603528	-	4734.46	5020.43	5646.17	1154.16	1224.91	1192.04
ENSG00000094755.17	GABRP	14.3325	-2.09607	0.55231	-3.7951	0.000147585	0.00116424	chr5:170763350-170814047	+	20.0249	31.172	18.1666	5.21299	5.51143	5.90705
ENSG00000234810.4	RP11-90C4.1	10.1323	-2.09191	0.658474	-3.1769	0.00148858	0.00879926	chr1:55329288-56070513	+	11.4428	19.0496	18.1666	3.12779	3.10018	5.90705
ENSG00000136160.17	EDNRB	2469.4	-2.09119	0.104068	-20.0945	8.25e-90	5.26e-87	chr13:77895481-77975529	-	3720.34	3635.01	4636.11	985.255	809.491	1030.19
ENSG00000175877.4	TMEM270	8.05165	-2.09075	0.729092	-2.86761	0.00413589	0.0210112	chr7:73861159-73865890	+	17.1642	12.9884	9.08329	2.0852	3.44464	3.54423
ENSG00000181201.3	H2BU2P	11.8095	-2.08661	0.604845	-3.44982	0.000560956	0.00376914	chr1:228464103-228464626	-	21.4553	14.7201	21.7999	4.17039	5.16696	3.54423
ENSG00000013588.9	GPRC5A	51.3875	-2.08167	0.363536	-5.72617	1.03e-08	1.64e-07	chr12:12891559-12917937	+	120.15	51.9534	76.2996	31.2779	14.4675	14.1769
ENSG00000214381.6	LINC00488	10.0411	-2.06251	0.699147	-2.95004	0.0031773	0.0168284	chr3:109178143-109216965	+	20.0249	8.6589	19.9832	7.29819	3.10018	1.18141
ENSG00000183508.5	TENT5C	372.69	-2.04896	0.140261	-14.6082	2.49e-48	5.12e-46	chr1:117606048-117628389	+	564.989	516.936	719.397	139.708	139.164	155.946
ENSG00000244682.7	FCGR2C	12.952	-2.03985	0.566557	-3.60042	0.000317698	0.00229544	chr1:161581339-161605662	+	20.0249	20.7814	21.7999	5.21299	5.16696	4.72564
ENSG00000256673.1	RP11-599J14.2	11.9924	-2.03981	0.603743	-3.37861	0.000728531	0.00472947	chr12:9398355-9414851	-	18.5946	13.8542	25.4332	5.21299	4.13357	4.72564
ENSG00000182752.10	PAPPA	188.339	-2.03852	0.167064	-12.2021	3.03e-34	3.19e-32	chr9:116153791-116402321	+	341.854	300.464	268.865	71.9393	79.5712	67.3404
ENSG00000171992.13	SYNPO	115.101	-2.03794	0.206939	-9.84798	6.99e-23	3.67e-21	chr5:150601080-150659207	+	190.237	188.764	176.216	33.3631	46.5027	55.5263
ENSG00000144218.21	AFF3	79.0757	-2.0345	0.265988	-7.64885	2.03e-14	5.88e-13	chr2:99545419-100192428	-	102.985	103.907	174.399	33.3631	27.9016	31.8981
ENSG00000086570.13	FAT2	79.8771	-2.03385	0.268043	-7.58777	3.25e-14	9.28e-13	chr5:151504092-151591331	-	120.15	91.7843	174.399	29.1927	30.6573	33.0795
ENSG00000186897.5	C1QL4	17.6208	-2.03114	0.514812	-3.9454	7.97e-05	0.000663365	chr12:49332409-49337188	-	32.8981	30.3062	21.7999	11.4686	6.88928	2.36282
ENSG00000143226.15	FCGR2A	100.13	-2.02251	0.233391	-8.66579	4.48e-18	1.74e-16	chr1:161505430-161524013	+	143.035	166.251	174.399	52.1299	41.3357	23.6282
ENSG00000260785.2	CASC17	27.7903	-2.01771	0.397273	-5.07892	3.8e-07	4.91e-06	chr17:71097774-71202203	-	35.7588	47.624	50.8664	12.5112	11.7118	8.26987
ENSG00000261633.1	RP11-405F3.5	10.26	-2.01688	0.666798	-3.02473	0.00248858	0.0136527	chr16:57622034-57631647	-	17.1642	14.7201	16.3499	4.17039	2.06678	7.08846
ENSG00000149596.7	JPH2	41.13	-2.01248	0.351006	-5.73346	9.84e-09	1.57e-07	chr20:44106590-44187188	-	47.2016	64.9418	87.1996	10.426	19.29	17.7211
ENSG00000165507.9	DEPP1	475.004	-2.00532	0.626441	-3.20114	0.00136887	0.00818958	chr10:44970981-44978809	-	752.365	985.383	544.997	219.988	283.494	63.7961
ENSG00000242574.9	HLA-DMB	8.34616	-2.00426	0.71219	-2.81423	0.00488948	0.0242158	chr6:32934629-32941028	-	11.4428	15.586	12.7166	5.21299	2.75571	2.36282
ENSG00000054356.14	PTPRN	35.023	-1.96199	0.444791	-4.41105	1.03e-05	0.000103507	chr2:219289623-219309648	-	74.3783	43.2945	49.0498	29.1927	10.6784	3.54423
ENSG00000230937.12	MIR205HG	22.8587	-1.95619	0.472188	-4.14282	3.43e-05	0.000308281	chr1:209428817-209432838	+	18.5946	49.3557	41.7831	6.25559	11.7118	9.45128
ENSG00000124107.5	SLPI	122.081	-1.95598	0.242134	-8.07808	6.58e-16	2.17e-14	chr20:45252239-45254564	-	193.097	141.14	245.249	60.4707	35.8243	56.7077
ENSG00000184347.15	SLIT3	65.3006	-1.95416	0.264361	-7.392	1.45e-13	3.87e-12	chr5:168661733-169301139	-	117.289	102.175	90.8329	22.9372	25.4903	33.0795
ENSG00000128285.4	MCHR1	11.2356	-1.95325	0.670367	-2.9137	0.00357173	0.0185984	chr22:40678750-40682814	+	27.1767	14.7201	12.7166	6.25559	6.54482	0
ENSG00000148482.12	SLC39A12	20.5327	-1.94418	0.477875	-4.06838	4.73e-05	0.000411567	chr10:17951839-18043292	+	30.0374	33.7697	34.5165	13.5538	8.95607	2.36282
ENSG00000137868.19	STRA6	148.56	-1.93733	0.181483	-10.675	1.33e-26	8.72e-25	chr15:74179466-74212267	-	207.401	238.12	263.415	59.4281	65.1037	57.8891
ENSG00000253368.4	TRNP1	191.906	-1.93643	0.165085	-11.7299	8.95e-32	8.15e-30	chr1:26993692-27000886	+	308.956	295.269	310.649	93.8338	81.2935	61.4333
ENSG00000100626.17	GALNT16	55.1984	-1.93066	0.313908	-6.15041	7.73e-10	1.4e-08	chr14:69259277-69357033	+	75.8086	68.4053	118.083	15.639	21.3568	31.8981
ENSG00000128422.17	KRT17	14.0734	-1.92172	0.607421	-3.16374	0.00155757	0.00916865	chr17:41619442-41624842	-	24.316	12.1225	30.8832	10.426	5.51143	1.18141
ENSG00000225774.2	SIRPAP1	9.19403	-1.91585	0.687239	-2.78775	0.00530756	0.0259739	chr22:30542536-30544305	+	10.0125	16.4519	16.3499	5.21299	2.41125	4.72564
ENSG00000147234.11	FRMPD3	16.4768	-1.89733	0.531763	-3.56799	0.000359725	0.00255886	chrX:107449652-107605255	+	17.1642	32.0379	27.2499	7.29819	4.47803	10.6327
ENSG00000251396.7	LINC01301	57.1089	-1.89396	0.281803	-6.72086	1.81e-11	3.98e-10	chr8:60289928-60516795	-	81.53	80.5278	107.183	26.065	21.3568	25.991
ENSG00000271447.6	MMP28	9.73213	-1.88001	0.651651	-2.88499	0.00391424	0.0200595	chr17:35756249-35795707	-	11.4428	16.4519	18.1666	3.12779	4.47803	4.72564
ENSG00000163072.16	NOSTRIN	17.2457	-1.87896	0.501452	-3.74703	0.000178939	0.00137481	chr2:168786539-168865514	+	28.607	19.9155	32.6998	6.25559	6.54482	9.45128
ENSG00000081479.15	LRP2	85.5147	-1.87361	0.245496	-7.63193	2.31e-14	6.66e-13	chr2:169127109-169362534	-	115.858	114.297	172.583	34.4057	33.413	42.5308
ENSG00000259207.9	ITGB3	1770.86	-1.8733	0.117979	-15.8783	8.96e-57	2.46e-54	chr17:47253827-47313743	+	2882.16	3023.69	2447.04	855.973	837.392	578.891
ENSG00000157404.16	KIT	292.743	-1.86952	0.164908	-11.3367	8.64e-30	6.69e-28	chr4:54657918-54740715	+	477.737	343.758	561.347	126.154	128.141	119.322
ENSG00000286505.1	RP11-255M6.2	14.1873	-1.86452	0.581605	-3.20582	0.0013468	0.00808203	chr15:84913144-84915705	-	24.316	30.3062	12.7166	2.0852	8.6116	7.08846
ENSG00000274209.6	ANTXRL	22.3035	-1.86195	0.44559	-4.17861	2.93e-05	0.000266911	chr10:46286345-46330207	+	40.0498	30.3062	36.3332	7.29819	12.7452	7.08846
ENSG00000185885.17	IFITM1	23.868	-1.86044	0.434232	-4.28444	1.83e-05	0.000174802	chr11:310041-315272	+	45.7712	26.8426	39.9665	7.29819	10.3339	12.9955
ENSG00000198729.5	PPP1R14C	902.981	-1.85898	0.12341	-15.0635	2.82e-51	6.12e-49	chr6:150143044-150250392	+	1270.15	1327.41	1642.26	372.207	334.475	471.383
ENSG00000234428.2	RP11-666F17.1	9.57193	-1.85503	0.672168	-2.75978	0.00578412	0.0279189	chr12:26623369-26649479	+	21.4553	13.8542	9.08329	5.21299	3.10018	4.72564
ENSG00000133401.16	PDZD2	1359.06	-1.85403	0.112788	-16.4382	1.02e-60	3.2e-58	chr5:31639131-32110932	+	1882.34	1932.67	2568.75	609.92	529.786	630.873
ENSG00000181652.19	ATG9B	25.6235	-1.84805	0.473906	-3.89961	9.63e-05	0.000789015	chr7:151012209-151024499	-	60.0748	29.4403	30.8832	19.8094	9.98946	3.54423
ENSG00000162692.12	VCAM1	18.7682	-1.84696	0.502791	-3.67341	0.000239333	0.00178067	chr1:100719742-100739045	+	18.5946	26.8426	41.7831	10.426	5.51143	9.45128
ENSG00000165092.13	ALDH1A1	17.3354	-1.84519	0.511869	-3.60481	0.000312376	0.00226278	chr9:72900671-73080442	-	21.4553	24.2449	34.5165	8.34078	4.8225	10.6327
ENSG00000168078.10	PBK	351.42	-1.83752	0.140061	-13.1194	2.55e-39	3.4e-37	chr8:27809624-27838082	-	512.066	497.887	644.914	138.666	170.854	144.132
ENSG00000141314.13	RHBDL3	361.185	-1.83616	0.138677	-13.2406	5.12e-40	7.07e-38	chr17:32265832-32324659	+	514.927	527.327	653.997	130.325	165.687	174.849
ENSG00000273124.1	RP11-236B18.5	9.07665	-1.82929	0.708317	-2.58259	0.00980614	0.0433026	chr10:90997480-90997713	-	14.3035	9.52479	19.9832	2.0852	6.20035	2.36282
ENSG00000007968.7	E2F2	87.9362	-1.82847	0.223537	-8.17973	2.84e-16	9.57e-15	chr1:23506438-23531233	-	124.441	136.811	150.783	36.4909	38.9244	40.1679
ENSG00000197410.14	DCHS2	9.04619	-1.82434	0.678993	-2.68683	0.00721329	0.0335551	chr4:154231742-154491799	-	18.5946	11.2566	12.7166	5.21299	4.13357	2.36282
ENSG00000286522.2	H3C2	1301.95	-1.82376	0.114699	-15.9004	6.3e-57	1.8e-54	chr6:26031589-26032099	-	1982.47	1747.37	2359.84	507.745	543.22	671.041
ENSG00000131771.14	PPP1R1B	50.3643	-1.82202	0.315705	-5.77128	7.87e-09	1.27e-07	chr17:39626740-39636626	+	84.3907	55.417	98.0995	22.9372	24.8014	16.5397
ENSG00000183780.13	SLC35F3	17.7148	-1.81795	0.500894	-3.62942	0.000284064	0.00207595	chr1:233904676-234324511	+	37.1891	23.379	21.7999	11.4686	6.54482	5.90705
ENSG00000261325.1	LINC02192	16.7015	-1.81345	0.527304	-3.4391	0.000583654	0.003906	chr16:47849314-47887130	-	12.8732	34.6356	30.8832	7.29819	8.6116	5.90705
ENSG00000134258.17	VTCN1	28.6599	-1.80731	0.397736	-4.54399	5.52e-06	5.86e-05	chr1:117143587-117210960	-	55.7837	33.7697	45.4164	14.5964	14.123	8.26987
ENSG00000076864.20	RAP1GAP	38.9444	-1.80321	0.396929	-4.5429	5.55e-06	5.89e-05	chr1:21596215-21669363	-	91.5425	37.2333	52.6831	27.1075	14.4675	10.6327
ENSG00000113739.11	STC2	406.022	-1.79964	0.639404	-2.81455	0.00488452	0.0242004	chr5:173314723-173328447	-	865.363	427.75	599.497	315.907	156.731	70.8846
ENSG00000115163.15	CENPA	131.186	-1.78503	0.191297	-9.33123	1.05e-20	4.68e-19	chr2:26764289-26801067	+	214.553	182.703	210.732	65.6837	52.0141	61.4333
ENSG00000186510.12	CLCNKA	11.8231	-1.7819	0.659881	-2.70033	0.00692707	0.0324451	chr1:16018875-16034050	+	27.1767	8.6589	18.1666	6.25559	2.41125	8.26987
ENSG00000100302.7	RASD2	19.7467	-1.77879	0.470934	-3.77716	0.000158629	0.00123606	chr22:35540831-35553999	+	31.4677	20.7814	39.9665	9.38338	8.6116	8.26987
ENSG00000051180.17	RAD51	36.8292	-1.77513	0.346185	-5.12768	2.93e-07	3.86e-06	chr15:40694774-40732340	+	52.923	54.5511	61.7664	17.7242	12.7452	21.2654
ENSG00000104368.19	PLAT	3550.05	-1.77427	0.0737024	-24.0734	4.75e-128	5.87e-125	chr8:42174718-42207709	-	5383.84	5352.07	5760.62	1576.41	1728.18	1499.21
ENSG00000255471.1	RP11-736K20.5	20.1285	-1.76674	0.487254	-3.62592	0.000287937	0.00210193	chr11:86892214-86925037	-	17.1642	33.7697	43.5998	6.25559	11.7118	8.26987
ENSG00000113083.15	LOX	363.564	-1.76418	0.534017	-3.3036	0.000954518	0.00598611	chr5:122063195-122078413	-	766.668	335.099	583.147	268.99	116.429	111.053
ENSG00000129195.16	PIMREG	315.858	-1.76341	0.142057	-12.4134	2.21e-35	2.39e-33	chr17:6444441-6451469	+	544.964	415.627	503.214	130.325	139.164	161.853
ENSG00000158008.10	EXTL1	45.0057	-1.75749	0.319803	-5.49556	3.89e-08	5.8e-07	chr1:26019884-26036464	+	68.6569	70.1371	70.8497	11.4686	24.1125	24.8096
ENSG00000173110.8	HSPA6	59.9512	-1.75704	0.26818	-6.55173	5.69e-11	1.18e-09	chr1:161524540-161526894	+	107.276	84.8572	85.3829	28.1501	26.8682	27.1724
ENSG00000110076.19	NRXN2	11.4544	-1.75595	0.655663	-2.67813	0.00740352	0.0342786	chr11:64606174-64723197	-	21.4553	15.586	14.5333	8.34078	1.72232	7.08846
ENSG00000276410.4	H2BC3	62.3432	-1.74936	0.30567	-5.72302	1.05e-08	1.66e-07	chr6:26043227-26043713	-	118.719	67.5394	99.9162	37.5335	19.6345	30.7167
ENSG00000277639.2	RP11-467J12.4	13.089	-1.74899	0.580261	-3.01414	0.00257709	0.0140215	chr16:53035690-53052873	-	15.7339	22.5131	23.6166	4.17039	8.95607	3.54423
ENSG00000169047.6	IRS1	603.686	-1.74704	0.102512	-17.0422	3.99e-65	1.36e-62	chr2:226731312-226799820	-	895.4	919.575	977.362	252.309	282.116	295.352
ENSG00000171848.16	RRM2	847.324	-1.74402	0.123614	-14.1087	3.36e-45	5.98e-43	chr2:10120698-10211725	+	1291.61	1079.76	1544.16	350.313	372.71	445.392
ENSG00000184357.5	H1-5	1047.17	-1.74326	0.128841	-13.5303	1.04e-41	1.53e-39	chr6:27866792-27867588	-	1896.65	1238.22	1700.39	506.703	427.136	513.913
ENSG00000178999.13	AURKB	174.251	-1.74253	0.16451	-10.5923	3.24e-26	2.05e-24	chr17:8204733-8210600	-	270.336	245.913	288.849	77.1523	78.1934	85.0615
ENSG00000149573.9	MPZL2	15.5192	-1.74128	0.531905	-3.27368	0.00106158	0.00659683	chr11:118253416-118264536	-	22.8856	20.7814	27.2499	11.4686	4.8225	5.90705
ENSG00000138741.11	TRPC3	13.0072	-1.7395	0.575222	-3.02405	0.00249411	0.0136792	chr4:121874481-121952060	-	21.4553	12.9884	25.4332	6.25559	4.8225	7.08846
ENSG00000253361.3	RP11-675F6.4	54.4694	-1.73659	0.312544	-5.55632	2.76e-08	4.18e-07	chr8:38543276-38560877	-	62.9355	75.3324	116.266	20.852	31.3462	20.084
ENSG00000198300.14	PEG3	250.727	-1.72571	0.160142	-10.7761	4.46e-27	3.02e-25	chr19:56810077-56840728	-	409.081	337.697	408.748	145.964	109.54	93.3314
ENSG00000198796.7	ALPK2	2039.59	-1.72497	0.0806157	-21.3975	1.41e-101	1.03e-98	chr18:58481247-58629091	-	2957.97	3267	3175.52	999.851	980.689	856.522
ENSG00000258998.2	LINC02302	11.0248	-1.72449	0.612022	-2.81769	0.0048371	0.0240286	chr14:44763153-44782829	-	14.3035	21.6473	14.5333	7.29819	4.8225	3.54423
ENSG00000106541.12	AGR2	1015.82	-1.72274	0.113979	-15.1146	1.3e-51	2.85e-49	chr7:16791811-16833433	-	1390.3	1461.62	1820.29	462.914	419.902	539.904
ENSG00000101412.13	E2F1	545.579	-1.72141	0.12616	-13.6446	2.17e-42	3.33e-40	chr20:33675477-33686385	-	720.897	833.852	957.379	215.818	254.903	290.627
ENSG00000274641.2	H2BC17	650.233	-1.72014	0.118165	-14.5572	5.26e-48	1.06e-45	chr6:27893425-27893891	+	994.094	870.219	1129.96	265.862	298.65	342.609
ENSG00000263293.2	EFCAB13-DT	69.5631	-1.71867	0.275752	-6.23267	4.59e-10	8.52e-09	chr17:47303460-47323613	-	112.998	95.2479	110.816	49.0021	26.8682	22.4468
ENSG00000024526.17	DEPDC1	236.604	-1.71504	0.15222	-11.2668	1.91e-29	1.45e-27	chr1:68474152-68497221	-	356.158	322.977	406.931	114.686	99.5501	119.322
ENSG00000204682.8	MIR1915HG	88.8658	-1.71447	0.228675	-7.49742	6.51e-14	1.8e-12	chr10:21492658-21497260	-	117.289	128.152	163.499	37.5335	40.6468	46.075
ENSG00000183578.8	TNFAIP8L3	115.194	-1.70882	0.20318	-8.41035	4.09e-17	1.47e-15	chr15:51056598-51105276	-	157.339	178.373	192.566	65.6837	49.9473	47.2564
ENSG00000259498.1	TPM1-AS	12.8414	-1.70648	0.574147	-2.97221	0.00295663	0.015778	chr15:63046034-63049387	-	14.3035	18.1837	27.2499	4.17039	7.23375	5.90705
ENSG00000124635.9	H2BC11	530.577	-1.70645	0.307182	-5.55518	2.77e-08	4.2e-07	chr6:27125897-27132795	-	893.97	578.415	962.829	281.501	180.844	285.901
ENSG00000143320.9	CRABP2	450.145	-1.70328	0.149059	-11.4268	3.07e-30	2.44e-28	chr1:156699606-156705816	-	733.77	655.479	677.613	278.374	203.234	152.402
ENSG00000197930.13	ERO1A	1524.31	-1.69868	0.438531	-3.87357	0.000107254	0.00087364	chr14:52639915-52695900	-	2952.25	1646.92	2392.54	1084.3	580.767	489.104
ENSG00000287080.2	H3C3	1110.4	-1.69838	0.240377	-7.06548	1.6e-12	3.93e-11	chr6:26045384-26045869	+	1848.01	1325.68	1918.39	443.104	469.16	658.045
ENSG00000138180.16	CEP55	454.807	-1.69659	0.119803	-14.1615	1.59e-45	2.9e-43	chr10:93496612-93529092	+	680.847	626.904	777.53	203.307	206.334	233.919
ENSG00000125931.11	CITED1	9.46863	-1.69494	0.665501	-2.54687	0.0108695	0.0470005	chrX:72301638-72307187	-	17.1642	12.9884	12.7166	7.29819	3.10018	3.54423
ENSG00000101057.16	MYBL2	166.525	-1.69492	0.183513	-9.23599	2.56e-20	1.13e-18	chr20:43667019-43716495	+	217.413	247.645	303.382	71.9393	90.2496	68.5218
ENSG00000130762.15	ARHGEF16	11.3478	-1.6938	0.601656	-2.81523	0.00487418	0.0241703	chr1:3454665-3481113	+	11.4428	19.0496	21.7999	5.21299	5.85589	4.72564
ENSG00000122952.17	ZWINT	410.545	-1.693	0.119754	-14.1374	2.24e-45	4.05e-43	chr10:56357227-56361273	-	609.33	580.146	695.78	182.455	199.445	196.114
ENSG00000273983.1	H3C8	529.721	-1.69129	0.298157	-5.67249	1.41e-08	2.21e-07	chr6:26269405-26271815	-	1004.11	608.721	812.046	291.927	181.533	279.994
ENSG00000196132.14	MYT1	28.9266	-1.68748	0.421923	-3.99949	6.35e-05	0.000540236	chr20:64102394-64242253	+	47.2016	37.2333	50.8664	13.5538	19.9789	4.72564
ENSG00000170312.16	CDK1	967.151	-1.68512	0.107393	-15.6911	1.74e-55	4.71e-53	chr10:60778331-60794852	+	1503.3	1246.88	1676.78	462.914	435.747	477.29
ENSG00000187134.14	AKR1C1	700.388	-1.68361	0.112244	-14.9996	7.39e-51	1.59e-48	chr10:4963253-4983283	+	1004.11	1015.69	1179.01	377.42	291.761	334.339
ENSG00000237649.8	KIFC1	268.893	-1.68005	0.146099	-11.4994	1.33e-30	1.08e-28	chr6:33391823-33409896	+	450.561	376.662	406.931	106.345	140.541	132.318
ENSG00000204516.10	MICB	10.966	-1.67321	0.617099	-2.7114	0.00669988	0.0315865	chr6:31494881-31511124	+	11.4428	17.3178	21.7999	3.12779	6.20035	5.90705
ENSG00000164106.8	SCRG1	1006.4	-1.67299	0.107814	-15.5174	2.65e-54	6.62e-52	chr4:173384701-173406380	-	1463.25	1499.72	1634.99	571.344	467.438	401.679
ENSG00000160339.16	FCN2	18.8075	-1.67202	0.493399	-3.38877	0.000702074	0.00458028	chr9:134880810-134887523	+	40.0498	21.6473	23.6166	13.5538	6.88928	7.08846
ENSG00000143228.13	NUF2	227.752	-1.66803	0.144159	-11.5708	5.79e-31	4.89e-29	chr1:163266576-163355764	+	357.588	325.575	357.882	107.388	110.573	107.508
ENSG00000103018.17	CYB5B	6424.19	-1.66525	0.059861	-27.8186	2.58e-170	6.37e-167	chr16:69424619-69466264	+	9757.86	9822.66	9724.57	3187.22	3065.04	2987.79
ENSG00000065328.17	MCM10	178.866	-1.66447	0.210402	-7.9109	2.56e-15	7.95e-14	chr10:13161558-13211110	+	253.172	213.009	350.615	59.4281	84.7382	112.234
ENSG00000276903.2	H2AC16	372.733	-1.66215	0.133846	-12.4184	2.08e-35	2.25e-33	chr6:27865317-27865798	+	613.621	503.082	581.331	155.347	171.543	211.472
ENSG00000118193.12	KIF14	584.586	-1.6608	0.108383	-15.3235	5.33e-53	1.25e-50	chr1:200551497-200620751	-	968.348	796.619	899.246	290.885	270.06	282.357
ENSG00000078269.15	SYNJ2	2378.96	-1.65997	0.0734027	-22.6145	3.12e-113	3.24e-110	chr6:157981863-158099176	+	3364.19	3705.14	3775.02	1161.45	1151.54	1116.43
ENSG00000100266.19	PACSIN2	3924.91	-1.65982	0.0737152	-22.5167	2.85e-112	2.45e-109	chr22:42835412-43015149	-	5669.91	5691.5	6529.07	1943.4	1858.38	1857.18
ENSG00000261527.1	RP11-343C2.10	12.639	-1.65761	0.614516	-2.69743	0.00698767	0.0326902	chr16:69443240-69444290	-	30.0374	10.3907	18.1666	7.29819	7.57821	2.36282
ENSG00000128342.5	LIF	78.3049	-1.64759	0.256198	-6.43093	1.27e-10	2.5e-09	chr22:30240453-30246759	-	100.125	127.286	132.616	34.4057	48.225	27.1724
ENSG00000179284.6	DAND5	12.2583	-1.64758	0.579713	-2.84206	0.00448227	0.0225666	chr19:12965159-12974760	+	18.5946	16.4519	19.9832	7.29819	4.13357	7.08846
ENSG00000196557.13	CACNA1H	26.1977	-1.64639	0.410933	-4.00645	6.16e-05	0.000526364	chr16:1153106-1221771	+	51.4927	36.3674	32.6998	12.5112	15.8454	8.26987
ENSG00000121966.7	CXCR4	20.044	-1.64617	0.526359	-3.12747	0.0017632	0.0101933	chr2:136114349-136118149	-	21.4553	14.7201	56.3164	7.29819	11.0229	9.45128
ENSG00000110427.17	KIAA1549L	74.7934	-1.64072	0.257521	-6.37122	1.88e-10	3.61e-09	chr11:33376108-33674102	+	112.998	91.7843	138.066	39.6187	40.3023	25.991
ENSG00000171241.9	SHCBP1	510.11	-1.64018	0.126184	-12.9983	1.25e-38	1.57e-36	chr16:46578591-46621379	-	759.517	652.015	906.512	240.84	235.958	265.817
ENSG00000139211.7	AMIGO2	427.792	-1.63879	0.128214	-12.7817	2.08e-37	2.5e-35	chr12:47075707-47079959	-	656.531	570.622	713.947	238.755	188.422	198.477
ENSG00000183856.11	IQGAP3	390.338	-1.63596	0.117637	-13.9069	5.75e-44	9.97e-42	chr1:156525405-156572604	-	623.633	559.365	590.414	177.242	192.9	198.477
ENSG00000249306.6	LINC01411	13.6657	-1.63587	0.564065	-2.90014	0.00373	0.0192801	chr5:174336295-174532457	+	24.316	25.9767	10.8999	9.38338	5.51143	5.90705
ENSG00000277586.4	NEFL	15.7961	-1.63109	0.506144	-3.22257	0.00127044	0.0076892	chr8:24950955-24956721	-	27.1767	25.1108	19.9832	7.29819	9.30053	5.90705
ENSG00000164266.11	SPINK1	12.7063	-1.62837	0.577181	-2.82124	0.00478379	0.0238117	chr5:147824572-147831671	-	27.1767	16.4519	14.5333	7.29819	7.23375	3.54423
ENSG00000117650.13	NEK2	296.738	-1.62751	0.138782	-11.7271	9.26e-32	8.39e-30	chr1:211658657-211675630	-	462.004	395.712	485.048	150.134	131.585	155.946
ENSG00000119938.9	PPP1R3C	1065.18	-1.62649	0.299081	-5.43827	5.38e-08	7.83e-07	chr10:91628442-91633071	-	1663.5	1496.26	1669.51	658.922	578.011	324.888
ENSG00000156970.13	BUB1B	227.856	-1.62458	0.154106	-10.542	5.53e-26	3.47e-24	chr15:40161023-40221123	+	357.588	290.939	385.131	111.558	108.506	113.415
ENSG00000186185.14	KIF18B	163.816	-1.62451	0.185916	-8.73784	2.38e-18	9.43e-17	chr17:44924709-44947773	-	230.287	236.388	276.132	57.3429	82.3269	100.42
ENSG00000104635.15	SLC39A14	2816.03	-1.6236	0.0865923	-18.75	1.94e-78	9.34e-76	chr8:22367278-22434129	+	4414.06	3804.72	4534.38	1509.68	1275.9	1357.44
ENSG00000270661.1	RP1-142L7.9	16.0909	-1.61618	0.5133	-3.1486	0.00164054	0.00957934	chr6:112217640-112219570	-	18.5946	32.0379	21.7999	5.21299	8.26714	10.6327
ENSG00000183186.8	C2CD4C	92.6938	-1.61282	0.225454	-7.15366	8.45e-13	2.14e-11	chr19:405445-409147	-	165.921	122.956	132.616	46.9169	49.9473	37.8051
ENSG00000157680.16	DGKI	502.425	-1.61212	0.117813	-13.6837	1.27e-42	1.99e-40	chr7:137381037-137847092	-	645.088	825.193	801.146	254.394	250.081	238.645
ENSG00000135363.12	LMO2	49.6603	-1.60619	0.303206	-5.29736	1.17e-07	1.63e-06	chr11:33858576-33892076	-	80.0997	58.0146	85.3829	28.1501	20.3234	25.991
ENSG00000137310.12	TCF19	623.188	-1.60453	0.116566	-13.765	4.14e-43	6.76e-41	chr6:31158547-31167159	+	889.679	835.584	1095.44	281.501	326.208	310.711
ENSG00000135898.10	GPR55	15.132	-1.60392	0.531345	-3.0186	0.00253948	0.0138665	chr2:230907318-230961066	-	18.5946	17.3178	32.6998	9.38338	6.88928	5.90705
ENSG00000131747.15	TOP2A	4264.63	-1.60206	0.0842972	-19.0049	1.55e-80	7.87e-78	chr17:40388525-40417896	-	6429.43	5682.84	7134.02	2100.83	2003.06	2237.59
ENSG00000198133.9	TMEM229B	225.172	-1.60097	0.154318	-10.3745	3.24e-25	1.94e-23	chr14:67447084-67533739	-	298.943	331.636	383.315	107.388	103.339	126.411
ENSG00000171320.15	ESCO2	152.098	-1.60053	0.185564	-8.62523	6.4e-18	2.46e-16	chr8:27771949-27812640	+	248.881	183.569	254.332	79.2374	70.9596	75.6102
ENSG00000101224.18	CDC25B	1334.54	-1.59872	0.117075	-13.6555	1.87e-42	2.89e-40	chr20:3786772-3806121	+	1919.53	1710.13	2388.91	601.579	617.969	769.098
ENSG00000068831.19	RASGRP2	12.567	-1.59748	0.566505	-2.81988	0.00480418	0.0238831	chr11:64726911-64745456	-	20.0249	17.3178	19.9832	7.29819	7.23375	3.54423
ENSG00000112742.10	TTK	347.756	-1.5939	0.140417	-11.3512	7.32e-30	5.69e-28	chr6:80003887-80042527	+	527.8	457.19	577.697	184.54	146.742	192.57
ENSG00000161888.11	SPC24	243.678	-1.59376	0.143455	-11.1099	1.12e-28	8.01e-27	chr19:11131520-11155808	-	394.777	342.892	361.515	108.43	123.318	131.136
ENSG00000089685.15	BIRC5	826.748	-1.59317	0.0990104	-16.0909	2.95e-58	8.71e-56	chr17:78214186-78225636	+	1255.85	1144.71	1322.53	388.889	391.311	457.206
ENSG00000278637.2	H4C1	245.638	-1.59314	0.179698	-8.86565	7.61e-19	3.16e-17	chr6:26021649-26022050	+	380.473	284.012	446.898	91.7486	133.652	137.044
ENSG00000134107.5	BHLHE40	989.998	-1.59287	0.39968	-3.98537	6.74e-05	0.000570427	chr3:4979437-4985323	+	1337.38	1788.93	1337.06	417.039	740.598	318.981
ENSG00000139734.19	DIAPH3	119.036	-1.58595	0.195391	-8.11684	4.78e-16	1.59e-14	chr13:59665583-60163928	-	200.249	156.726	179.849	58.3855	59.9368	59.0705
ENSG00000267257.1	RP11-1151B14.4	15.3397	-1.5827	0.520532	-3.04055	0.00236149	0.0130671	chr18:58535415-58538552	+	18.5946	21.6473	29.0665	10.426	7.57821	4.72564
ENSG00000093009.11	CDC45	125.074	-1.5792	0.205448	-7.68663	1.51e-14	4.44e-13	chr22:19479457-19520612	+	150.187	195.691	217.999	49.0021	67.8594	69.7032
ENSG00000253837.1	RP11-177H13.2	11.9829	-1.57704	0.595963	-2.6462	0.0081402	0.0371412	chr8:23336171-23366125	+	15.7339	19.9155	18.1666	2.0852	6.54482	9.45128
ENSG00000085840.13	ORC1	109.51	-1.57617	0.212335	-7.42304	1.14e-13	3.09e-12	chr1:52372829-52404423	-	160.199	139.408	196.199	47.9595	61.3146	51.982
ENSG00000185201.17	IFITM2	74.0811	-1.57249	0.242539	-6.48345	8.96e-11	1.8e-09	chr11:303655-309397	+	101.555	114.297	114.449	39.6187	32.0352	42.5308
ENSG00000189057.11	FAM111B	297.568	-1.5724	0.15062	-10.4395	1.64e-25	1e-23	chr11:59107185-59127412	+	434.827	397.444	503.214	121.984	143.642	184.3
ENSG00000204711.9	C9orf135	42.9463	-1.5676	0.318027	-4.92915	8.26e-07	1.01e-05	chr9:69820817-69906227	+	51.4927	65.8076	76.2996	16.6816	23.768	23.6282
ENSG00000114268.12	PFKFB4	1054.95	-1.56554	0.544411	-2.87565	0.0040319	0.0205877	chr3:48517684-48562015	-	2021.09	1007.9	1702.21	875.782	414.39	308.348
ENSG00000101665.10	SMAD7	35.654	-1.56251	0.334956	-4.66483	3.09e-06	3.46e-05	chr18:48919853-48950965	-	52.923	51.9534	54.4997	18.7668	16.8787	18.9026
ENSG00000154760.14	SLFN13	29.7853	-1.5624	0.374369	-4.17342	3e-05	0.000272375	chr17:35435096-35448837	-	42.9105	44.1604	47.2331	18.7668	16.1898	9.45128
ENSG00000169679.15	BUB1	514.49	-1.55982	0.122875	-12.6943	6.36e-37	7.62e-35	chr2:110637528-110678063	-	769.529	655.479	879.262	262.735	241.125	278.813
ENSG00000164125.16	GASK1B	3889.26	-1.55824	0.0834026	-18.6833	6.77e-78	3.19e-75	chr4:158124474-158173318	-	5711.39	5435.19	6272.92	2207.18	1869.41	1839.46
ENSG00000140092.15	FBLN5	28.596	-1.55723	0.391559	-3.977	6.98e-05	0.000589123	chr14:91869411-91947987	-	41.4802	33.7697	54.4997	10.426	17.2232	14.1769
ENSG00000080573.7	COL5A3	81.4976	-1.55449	0.236839	-6.5635	5.26e-11	1.09e-09	chr19:9959561-10010504	-	94.4032	132.481	138.066	40.6613	42.0246	41.3493
ENSG00000126259.20	KIRREL2	46.5537	-1.55426	0.31218	-4.97872	6.4e-07	8.04e-06	chr19:35855861-35867136	+	74.3783	51.9534	83.5663	26.065	24.457	18.9026
ENSG00000145779.8	TNFAIP8	56.0639	-1.55258	0.278055	-5.58373	2.35e-08	3.6e-07	chr5:119268692-119399688	+	82.9604	71.003	98.0995	23.9798	29.6239	30.7167
ENSG00000094804.12	CDC6	427.328	-1.55234	0.122318	-12.691	6.64e-37	7.9e-35	chr17:40287879-40304657	+	637.937	587.073	686.697	190.795	212.19	249.277
ENSG00000286333.1	RP3-514A23.4	11.6672	-1.55195	0.58566	-2.64992	0.0080511	0.0367941	chr14:72515407-72544622	-	18.5946	17.3178	16.3499	8.34078	5.85589	3.54423
ENSG00000164976.9	MYORG	1069.48	-1.54504	0.105961	-14.5812	3.7e-48	7.53e-46	chr9:34366666-34376898	-	1456.1	1463.35	1858.44	522.342	515.318	601.338
ENSG00000226440.7	LAMA4-AS1	47.0979	-1.54406	0.317175	-4.86815	1.13e-06	1.36e-05	chr6:112236093-112307009	+	50.0623	93.5161	65.3997	26.065	22.7346	24.8096
ENSG00000281406.2	BLACAT1	244.352	-1.5434	0.16138	-9.56376	1.14e-21	5.43e-20	chr1:205434885-205457091	-	290.361	394.846	408.748	105.302	135.719	131.136
ENSG00000157150.5	TIMP4	121.204	-1.54291	0.196412	-7.85548	3.98e-15	1.22e-13	chr3:12153068-12158912	-	177.364	161.056	201.649	60.4707	55.8032	70.8846
ENSG00000230943.3	LINC02541	21.2859	-1.5428	0.469277	-3.28761	0.00101041	0.00631062	chr6:113616927-113650090	-	22.8856	22.5131	50.8664	11.4686	11.7118	8.26987
ENSG00000143476.18	DTL	383.938	-1.54237	0.150074	-10.2774	8.91e-25	5.18e-23	chr1:212035553-212107400	+	509.205	484.898	719.397	199.136	173.61	217.379
ENSG00000165376.12	CLDN2	39.1791	-1.54113	0.325104	-4.74042	2.13e-06	2.46e-05	chrX:106900164-106930861	+	58.6444	57.1487	58.1331	25.0224	17.2232	18.9026
ENSG00000167900.12	TK1	219.513	-1.54063	0.1558	-9.88851	4.67e-23	2.47e-21	chr17:78174091-78187233	-	308.956	310.855	359.698	94.8764	109.195	133.499
ENSG00000141750.7	STAC2	42.618	-1.53862	0.344439	-4.46703	7.93e-06	8.15e-05	chr17:39210541-39225945	-	77.239	74.4665	39.9665	17.7242	28.5905	17.7211
ENSG00000011426.11	ANLN	1126.89	-1.53763	0.0944582	-16.2784	1.4e-59	4.27e-57	chr7:36389821-36453791	+	1677.8	1513.58	1834.82	594.281	535.986	604.882
ENSG00000142945.13	KIF2C	369.422	-1.53673	0.122851	-12.5089	6.68e-36	7.54e-34	chr1:44739818-44767767	+	543.534	502.216	606.764	186.625	194.278	183.119
ENSG00000075218.19	GTSE1	116.821	-1.53065	0.19757	-7.74738	9.38e-15	2.81e-13	chr22:46296870-46330810	+	195.958	165.385	161.683	60.4707	65.4482	51.982
ENSG00000188783.6	PRELP	35.8361	-1.52928	0.380315	-4.02108	5.79e-05	0.000496654	chr1:203475806-203491352	+	37.1891	48.4898	76.2996	20.852	22.7346	9.45128
ENSG00000105889.16	STEAP1B	17.1301	-1.52889	0.524775	-2.91341	0.003575	0.0186105	chr7:22419444-22727613	-	14.3035	23.379	39.9665	9.38338	11.0229	4.72564
ENSG00000135476.12	ESPL1	119.033	-1.52801	0.195201	-7.82787	4.96e-15	1.51e-13	chr12:53268299-53293638	+	177.364	156.726	198.016	55.2577	63.0369	63.7961
ENSG00000202354.1	RNY3	31.8612	-1.52753	0.416577	-3.66685	0.00024556	0.00181946	chr7:148983755-148983856	+	77.239	37.2333	29.0665	15.639	21.3568	10.6327
ENSG00000169908.12	TM4SF1	1681.56	-1.52448	0.0833934	-18.2806	1.18e-74	5.08e-72	chr3:149369022-149377692	-	2427.31	2319.72	2741.34	903.932	842.904	854.159
ENSG00000121152.10	NCAPH	235.779	-1.52433	0.162077	-9.40498	5.2e-21	2.36e-19	chr2:96335766-96377091	+	314.677	308.257	425.098	127.197	107.128	132.318
ENSG00000137812.20	KNL1	339.214	-1.52204	0.126625	-12.0201	2.79e-33	2.82e-31	chr15:40594020-40664342	+	510.635	452.86	546.814	178.284	169.476	177.211
ENSG00000178752.16	ERFE	38.4348	-1.5206	0.322241	-4.71885	2.37e-06	2.72e-05	chr2:238158970-238168900	+	60.0748	54.5511	56.3164	18.7668	19.6345	21.2654
ENSG00000286553.1	RP11-486M3.5	33.8495	-1.5201	0.369547	-4.11342	3.9e-05	0.000347796	chr6:154477982-154479593	+	64.3658	44.1604	43.5998	20.852	20.6678	9.45128
ENSG00000186832.9	KRT16	110.39	-1.51854	0.20723	-7.32779	2.34e-13	6.16e-12	chr17:41609778-41615899	-	188.806	141.14	163.499	49.0021	62.0035	57.8891
ENSG00000131095.14	GFAP	135.626	-1.51853	0.180374	-8.41878	3.8e-17	1.38e-15	chr17:44903159-44916937	-	188.806	215.607	199.832	67.7689	74.4043	67.3404
ENSG00000268894.7	PLCE1-AS1	15.8017	-1.51775	0.516457	-2.93877	0.00329518	0.0173689	chr10:94278681-94287478	-	18.5946	19.0496	32.6998	6.25559	7.57821	10.6327
ENSG00000099194.6	SCD	38914.6	-1.51775	0.263434	-5.76138	8.34e-09	1.34e-07	chr10:100347233-100364826	+	64280	49193.8	59579.1	26427.8	18935.9	15071.2
ENSG00000185585.20	OLFML2A	583.941	-1.51707	0.269633	-5.62642	1.84e-08	2.86e-07	chr9:124777133-124814885	+	1045.59	728.214	822.946	389.932	286.594	230.375
ENSG00000131094.4	C1QL1	467.756	-1.51698	0.133988	-11.3217	1.02e-29	7.91e-28	chr17:44959693-44968303	-	826.743	679.724	577.697	229.372	269.715	223.286
ENSG00000152253.9	SPC25	61.9858	-1.5153	0.266576	-5.68431	1.31e-08	2.07e-07	chr2:168834132-168913371	-	87.2514	95.2479	90.8329	28.1501	27.9016	42.5308
ENSG00000103257.9	SLC7A5	476.46	-1.51487	0.282059	-5.37075	7.84e-08	1.11e-06	chr16:87830023-87869507	-	839.616	607.855	670.347	327.376	230.447	183.119
ENSG00000141526.18	SLC16A3	2203.5	-1.51146	0.277323	-5.45018	5.03e-08	7.37e-07	chr17:82217934-82261129	+	3909.15	3040.14	2839.44	1444	1190.81	797.452
ENSG00000164611.13	PTTG1	506.19	-1.51062	0.109401	-13.8081	2.28e-43	3.78e-41	chr5:160421855-160428739	+	683.708	761.983	799.329	274.203	249.736	268.18
ENSG00000164087.8	POC1A	86.3021	-1.5078	0.238163	-6.33094	2.44e-10	4.66e-09	chr3:52075226-52154690	-	150.187	112.566	123.533	47.9595	51.6696	31.8981
ENSG00000223131.1	RNA5SP304	33.7592	-1.50469	0.361768	-4.15928	3.19e-05	0.000288206	chr10:22997255-22997358	+	60.0748	39.8309	49.0498	22.9372	14.123	16.5397
ENSG00000164124.11	TMEM144	170.274	-1.5028	0.174665	-8.6039	7.71e-18	2.95e-16	chr4:158201604-158255416	+	241.729	231.193	285.215	102.175	91.6275	69.7032
ENSG00000163808.17	KIF15	221.428	-1.50279	0.163908	-9.16848	4.8e-20	2.1e-18	chr3:44761721-44873376	+	333.272	264.096	385.131	115.728	107.473	122.867
ENSG00000111674.9	ENO2	2180	-1.50243	0.27403	-5.48274	4.19e-08	6.21e-07	chr12:6913745-6923698	+	3899.14	2518.87	3250	1454.42	1056.13	901.416
ENSG00000182632.15	CCNYL2	14.0685	-1.50153	0.534596	-2.80872	0.00497386	0.0245721	chr10:42408168-42475349	-	18.5946	19.0496	25.4332	8.34078	8.26714	4.72564
ENSG00000275714.2	H3C1	192.079	-1.50043	0.179781	-8.3459	7.07e-17	2.49e-15	chr6:26020451-26020958	+	280.349	219.936	352.432	99.0468	94.3832	106.327
ENSG00000109255.11	NMU	89.0417	-1.49805	0.225266	-6.65013	2.93e-11	6.28e-10	chr4:55595229-55636698	-	145.896	129.884	119.899	54.2151	48.9139	35.4423
ENSG00000165304.8	MELK	332.575	-1.49691	0.126664	-11.818	3.15e-32	2.98e-30	chr9:36572862-36677683	+	470.586	466.715	534.097	174.114	163.276	186.663
ENSG00000066279.19	ASPM	1032.18	-1.49652	0.112163	-13.3424	1.31e-40	1.85e-38	chr1:197084121-197146694	-	1494.72	1305.76	1769.42	539.023	486.383	597.793
ENSG00000277775.2	H3C7	1032.85	-1.49576	0.106825	-14.0019	1.52e-44	2.68e-42	chr6:26250142-26250635	-	1493.29	1353.39	1727.64	492.106	516.352	614.333
ENSG00000072571.20	HMMR	262.352	-1.49288	0.156343	-9.54871	1.31e-21	6.21e-20	chr5:163460203-163491941	+	414.802	331.636	410.565	145.964	114.018	157.128
ENSG00000059804.16	SLC2A3	2310.88	-1.49161	0.27996	-5.32796	9.93e-08	1.4e-06	chr12:7919230-7936187	-	4085.08	2477.31	3667.83	1417.93	1325.15	891.964
ENSG00000111640.15	GAPDH	52570.6	-1.48881	0.226309	-6.57868	4.75e-11	9.93e-10	chr12:6534512-6538374	+	91011.8	63747.7	77802	33913.6	26217.2	22731.5
ENSG00000138778.13	CENPE	323.112	-1.48793	0.144349	-10.3078	6.5e-25	3.83e-23	chr4:103105349-103198445	-	472.016	406.102	550.447	194.966	153.287	161.853
ENSG00000137807.16	KIF23	578.054	-1.48789	0.112815	-13.1887	1.02e-39	1.39e-37	chr15:69414246-69448427	+	892.539	742.068	921.046	304.439	284.527	323.706
ENSG00000035499.13	DEPDC1B	175.34	-1.4877	0.166453	-8.93762	3.98e-19	1.68e-17	chr5:60596912-60700190	-	240.299	238.12	297.932	99.0468	89.2162	87.4243
ENSG00000100162.15	CENPM	100.947	-1.48497	0.221124	-6.71556	1.87e-11	4.11e-10	chr22:41938737-41947152	-	135.883	128.152	181.666	47.9595	48.225	63.7961
ENSG00000123219.13	CENPK	196.681	-1.48442	0.159863	-9.28562	1.61e-20	7.16e-19	chr5:65517766-65563168	-	277.488	267.56	325.182	117.814	99.8946	92.15
ENSG00000184557.4	SOCS3	486.47	-1.48325	0.119369	-12.4258	1.89e-35	2.08e-33	chr17:78356778-78360077	-	805.288	725.616	614.03	254.394	244.225	275.268
ENSG00000196747.4	H2AC13	448.41	-1.48026	0.138702	-10.6722	1.37e-26	8.93e-25	chr6:27808199-27808701	+	750.935	518.668	710.313	242.925	215.979	251.64
ENSG00000177602.5	HASPIN	65.6646	-1.4795	0.260525	-5.6789	1.36e-08	2.13e-07	chr17:3723903-3726699	+	88.6818	89.1867	110.816	31.2779	30.3128	43.7122
ENSG00000129521.15	EGLN3	1117.11	-1.47475	0.522629	-2.82179	0.00477567	0.0237893	chr14:33924227-34462774	-	2071.15	1230.43	1627.73	960.233	520.141	292.99
ENSG00000157456.8	CCNB2	260.933	-1.4745	0.145417	-10.1398	3.68e-24	2.09e-22	chr15:59105126-59125045	+	379.043	342.027	435.998	134.495	148.809	125.229
ENSG00000148344.11	PTGES	44.0926	-1.47384	0.314992	-4.67897	2.88e-06	3.24e-05	chr9:129738331-129753042	-	57.2141	54.5511	83.5663	19.8094	23.4236	25.991
ENSG00000119900.9	OGFRL1	2604.03	-1.4721	0.0826018	-17.8217	4.8e-71	1.86e-68	chr6:71288811-71309059	+	3924.88	3577.86	3974.85	1514.89	1254.19	1377.52
ENSG00000112562.19	SMOC2	144.559	-1.47197	0.225116	-6.53872	6.2e-11	1.28e-09	chr6:168441151-168673445	+	234.578	213.009	188.932	114.686	68.8928	47.2564
ENSG00000282851.2	BISPR	17.5675	-1.4718	0.49448	-2.97647	0.0029159	0.0155802	chr19:17405686-17419324	+	17.1642	25.1108	36.3332	8.34078	11.3673	7.08846
ENSG00000132481.7	TRIM47	211.697	-1.46841	0.151218	-9.7106	2.72e-22	1.36e-20	chr17:75874164-75878581	-	280.349	329.038	321.548	106.345	108.851	124.048
ENSG00000127824.15	TUBA4A	86.9572	-1.46594	0.225743	-6.49386	8.37e-11	1.69e-09	chr2:219249710-219277902	-	130.162	110.834	141.699	52.1299	42.0246	44.8936
ENSG00000168077.14	SCARA3	407.959	-1.46453	0.115995	-12.6259	1.52e-36	1.78e-34	chr8:27633868-27676776	+	609.33	554.17	637.647	214.775	223.902	207.928
ENSG00000150995.21	ITPR1	2907.49	-1.46362	0.103054	-14.2024	8.85e-46	1.65e-43	chr3:4493345-4847506	+	4555.67	3815.11	4427.2	1845.4	1357.88	1443.68
ENSG00000129675.16	ARHGEF6	1353.18	-1.46317	0.108959	-13.4286	4.11e-41	5.93e-39	chrX:136665547-136780932	-	1766.48	1774.21	2421.61	698.541	717.519	740.744
ENSG00000134824.14	FADS2	2121.32	-1.46158	0.0775317	-18.8514	2.86e-79	1.41e-76	chr11:61792980-61867354	+	3008.03	2934.5	3400.78	1118.71	1141.21	1124.7
ENSG00000179242.16	CDH4	2356.35	-1.46059	0.0801051	-18.2335	2.8e-74	1.15e-71	chr20:61252261-61940617	+	3291.24	3403.81	3687.82	1181.26	1363.04	1210.95
ENSG00000278588.2	H2BC10	453.768	-1.46027	0.112885	-12.936	2.82e-38	3.53e-36	chr6:26272931-26273412	+	647.949	639.027	708.497	226.244	233.891	266.999
ENSG00000140451.13	PIF1	60.0096	-1.45966	0.266781	-5.47138	4.47e-08	6.58e-07	chr15:64815632-64825668	-	95.8335	84.8572	85.3829	26.065	37.2021	30.7167
ENSG00000174371.17	EXO1	276.161	-1.45924	0.137621	-10.6034	2.87e-26	1.84e-24	chr1:241847967-241895148	+	390.486	371.467	455.981	137.623	150.186	151.22
ENSG00000122966.17	CIT	168.26	-1.45795	0.167458	-8.70636	3.14e-18	1.23e-16	chr12:119685791-119877320	-	238.869	245.913	256.149	74.0245	93.0053	101.601
ENSG00000114019.15	AMOTL2	2660.93	-1.45617	0.279783	-5.20463	1.94e-07	2.63e-06	chr3:134355347-134375479	-	3062.38	4958.95	3680.55	1066.58	1700.27	1496.85
ENSG00000117724.13	CENPF	3275.59	-1.45436	0.08518	-17.074	2.32e-65	8.03e-63	chr1:214603195-214664571	+	4821.71	4236.8	5340.97	1815.16	1662.04	1776.84
ENSG00000222220.1	RN7SKP129	16.3406	-1.45409	0.536874	-2.70843	0.00676021	0.0317889	chr7:94801514-94801812	+	30.0374	28.5744	14.5333	5.21299	13.7786	5.90705
ENSG00000234393.1	RP11-211N11.5	33.3856	-1.45148	0.355955	-4.07771	4.55e-05	0.000397337	chr10:113710681-113719332	-	55.7837	43.2945	47.2331	23.9798	15.8454	14.1769
ENSG00000179715.13	PCED1B	21.2673	-1.45131	0.441285	-3.28882	0.00100608	0.00628556	chr12:47079603-47236662	+	38.6195	25.1108	29.0665	12.5112	9.30053	12.9955
ENSG00000124785.9	NRN1	479.77	-1.44957	0.546058	-2.6546	0.00794014	0.0364303	chr6:5997999-6007605	-	952.614	482.301	672.163	428.508	205.99	137.044
ENSG00000148773.14	MKI67	549.194	-1.44918	0.121193	-11.9577	5.92e-33	5.91e-31	chr10:128096659-128126423	-	798.136	697.907	917.412	263.777	288.316	329.613
ENSG00000112715.25	VEGFA	5882.76	-1.44834	0.396469	-3.65311	0.000259088	0.00191253	chr6:43770184-43786487	+	9902.32	7963.59	7966.05	4408.1	3482.88	1573.64
ENSG00000198832.10	SELENOM	18.2937	-1.44822	0.484112	-2.9915	0.0027761	0.0149478	chr22:31104772-31120069	-	34.3284	18.1837	29.0665	9.38338	11.7118	7.08846
ENSG00000248727.6	LINC01948	17.863	-1.44781	0.4789	-3.02319	0.00250125	0.0137009	chr5:56451627-56481946	-	28.607	19.9155	30.8832	7.29819	11.0229	9.45128
ENSG00000135362.14	PRR5L	176.95	-1.44313	0.202316	-7.13304	9.82e-13	2.46e-11	chr11:36296288-36465204	+	323.259	194.825	256.149	117.814	77.5044	92.15
ENSG00000280339.1	RP11-736K20.4	16.038	-1.44288	0.512109	-2.81753	0.00483943	0.0240342	chr11:86908990-86912238	-	31.4677	17.3178	21.7999	11.4686	8.26714	5.90705
ENSG00000168404.13	MLKL	29.9707	-1.44173	0.368706	-3.91026	9.22e-05	0.000758192	chr16:74671855-74700960	-	50.0623	45.8922	34.5165	15.639	14.812	18.9026
ENSG00000179270.7	PCARE	67.5592	-1.44146	0.261523	-5.51178	3.55e-08	5.29e-07	chr2:29060976-29074523	-	124.441	86.589	85.3829	42.7465	35.4798	30.7167
ENSG00000142611.17	PRDM16	41.9956	-1.44111	0.323571	-4.45377	8.44e-06	8.66e-05	chr1:3069168-3438621	+	77.239	45.8922	61.7664	21.8946	22.7346	22.4468
ENSG00000151224.13	MAT1A	17.671	-1.43699	0.474572	-3.02797	0.00246204	0.0135371	chr10:80271820-80289658	-	22.8856	26.8426	27.2499	12.5112	8.26714	8.26987
ENSG00000126787.13	DLGAP5	311.968	-1.43597	0.142554	-10.0732	7.26e-24	4.09e-22	chr14:55148112-55191608	-	494.902	387.919	481.414	186.625	148.464	172.486
ENSG00000109805.10	NCAPG	320.618	-1.43481	0.150085	-9.56001	1.18e-21	5.62e-20	chr4:17810979-17844865	+	484.889	372.333	546.814	185.582	155.698	178.393
ENSG00000164741.15	DLC1	119.703	-1.43455	0.193477	-7.41459	1.22e-13	3.29e-12	chr8:13083361-13604610	-	178.794	172.312	176.216	55.2577	73.0264	62.6147
ENSG00000151725.12	CENPU	233.792	-1.43388	0.141353	-10.144	3.52e-24	2.01e-22	chr4:184694085-184734130	-	337.563	327.306	357.882	124.069	121.251	134.681
ENSG00000157152.17	SYN2	12.8986	-1.43366	0.5483	-2.61473	0.00892972	0.0400773	chr3:12004388-12192032	+	20.0249	16.4519	19.9832	7.29819	6.54482	7.08846
ENSG00000204128.6	C2orf72	126.148	-1.43221	0.544933	-2.62823	0.0085831	0.0388214	chr2:231037523-231049719	+	263.185	138.542	150.783	106.345	66.1371	31.8981
ENSG00000253190.4	AC084082.3	93.0343	-1.43049	0.305027	-4.6897	2.74e-06	3.09e-05	chr8:66112667-66126632	+	223.135	76.1983	107.183	51.0873	42.7136	57.8891
ENSG00000196154.12	S100A4	185.674	-1.42643	0.18741	-7.6113	2.71e-14	7.75e-13	chr1:153543613-153550136	-	257.463	247.645	301.565	119.899	74.0598	113.415
ENSG00000005884.18	ITGA3	18304	-1.42635	0.0811137	-17.5846	3.23e-69	1.21e-66	chr17:50055968-50090481	+	26251.2	28864.4	24937.3	9506.41	11122.7	9141.75
ENSG00000228412.9	LNC-LBCS	104.241	-1.42493	0.206616	-6.89653	5.33e-12	1.24e-10	chr6:19323428-19839080	-	155.908	166.251	132.616	49.0021	57.87	63.7961
ENSG00000237423.3	LINC01522	13.8601	-1.42483	0.564549	-2.52383	0.0116084	0.0496738	chr20:47976739-47990127	-	15.7339	25.1108	18.1666	9.38338	4.13357	10.6327
ENSG00000284946.1	AC068831.18	61.4541	-1.42397	0.270083	-5.27234	1.35e-07	1.86e-06	chr15:90966190-91022566	-	80.0997	83.9913	107.183	34.4057	38.2355	24.8096
ENSG00000104213.13	PDGFRL	36.911	-1.42232	0.340658	-4.17522	2.98e-05	0.000270477	chr8:17576433-17644071	+	52.923	52.8193	54.4997	28.1501	16.5343	16.5397
ENSG00000113070.8	HBEGF	371.051	-1.4203	0.123382	-11.5114	1.16e-30	9.52e-29	chr5:140332843-140346603	-	487.75	600.928	530.464	201.221	203.923	202.021
ENSG00000106031.9	HOXA13	87.9006	-1.41967	0.515044	-2.75641	0.00584395	0.0281527	chr7:27193503-27200091	-	141.605	71.8689	170.766	72.9819	40.6468	29.5352
ENSG00000213694.6	S1PR3	143.81	-1.4161	0.183145	-7.73212	1.06e-14	3.16e-13	chr9:88990863-89005155	+	180.224	222.534	221.632	86.5356	69.2373	82.6987
ENSG00000164434.12	FABP7	32125.6	-1.41582	0.0782846	-18.0856	4.14e-73	1.67e-70	chr6:122779716-122784074	+	44076.3	44186.4	51940.1	18925.2	16351.4	17274.6
ENSG00000123485.12	HJURP	313.8	-1.41514	0.132484	-10.6816	1.24e-26	8.18e-25	chr2:233833416-233854566	-	506.344	406.102	459.614	160.56	175.332	174.849
ENSG00000234323.8	LINC01505	32.4839	-1.41297	0.376689	-3.75102	0.000176119	0.00135525	chr9:105993310-106740875	+	28.607	51.0875	61.7664	21.8946	16.1898	15.3583
ENSG00000129810.15	SGO1	61.7869	-1.41275	0.272678	-5.18101	2.21e-07	2.96e-06	chr3:20160593-20186206	-	94.4032	67.5394	108.999	30.2353	34.1019	35.4423
ENSG00000286387.1	RP11-166M16.1	19.4593	-1.41153	0.464353	-3.03978	0.0023675	0.0130924	chr17:71678899-71743468	-	20.0249	29.4403	36.3332	11.4686	12.4007	7.08846
ENSG00000076716.9	GPC4	2584.5	-1.41002	0.0990641	-14.2334	5.69e-46	1.07e-43	chrX:133300103-133415489	-	3261.2	3646.26	4365.43	1267.8	1477.75	1488.58
ENSG00000112984.12	KIF20A	483.241	-1.40676	0.121524	-11.576	5.45e-31	4.65e-29	chr5:138178719-138187723	+	735.201	599.196	770.263	263.777	246.292	284.72
ENSG00000175063.17	UBE2C	260.852	-1.4046	0.162157	-8.662	4.64e-18	1.8e-16	chr20:45812576-45816957	+	360.449	342.892	434.181	106.345	146.397	174.849
ENSG00000142227.11	EMP3	475.427	-1.4034	0.115291	-12.1727	4.34e-34	4.54e-32	chr19:48321509-48330553	+	709.454	608.721	753.913	271.075	254.215	255.185
ENSG00000139832.5	RAB20	206.44	-1.40261	0.19753	-7.10076	1.24e-12	3.08e-11	chr13:110523066-110561722	-	380.473	246.779	274.315	140.751	119.529	76.7916
ENSG00000148926.10	ADM	985.687	-1.39619	0.518977	-2.69027	0.00713939	0.0332426	chr11:10305073-10307397	+	1313.06	1784.6	1189.91	417.039	920.064	289.445
ENSG00000073734.10	ABCB11	309.053	-1.39304	0.124105	-11.2247	3.08e-29	2.28e-27	chr2:168915498-169031324	-	436.257	460.653	445.081	173.071	169.132	170.123
ENSG00000076641.4	PAG1	703.383	-1.39099	0.121254	-11.4717	1.83e-30	1.48e-28	chr8:80967810-81112068	-	1006.97	871.085	1177.19	446.232	353.765	365.056
ENSG00000145386.11	CCNA2	321.076	-1.3902	0.131135	-10.6013	2.94e-26	1.88e-24	chr4:121816444-121823883	-	489.18	410.432	494.131	179.327	166.721	186.663
ENSG00000162591.16	MEGF6	64.4697	-1.38987	0.263399	-5.2767	1.32e-07	1.82e-06	chr1:3487951-3611508	-	102.985	77.0642	101.733	40.6613	37.2021	27.1724
ENSG00000077152.11	UBE2T	395.902	-1.38985	0.121133	-11.4738	1.79e-30	1.45e-28	chr1:202331657-202341980	-	579.292	520.4	617.664	229.372	201.856	226.831
ENSG00000157470.12	FAM81A	144.319	-1.38936	0.175238	-7.92844	2.22e-15	7.01e-14	chr15:59372693-59523555	+	190.237	217.338	217.999	75.0671	77.8489	87.4243
ENSG00000274997.2	H2AC12	543.539	-1.38917	0.141804	-9.79639	1.17e-22	6.04e-21	chr6:27147106-27147562	+	908.273	613.05	835.663	320.078	254.559	329.613
ENSG00000151632.17	AKR1C2	118.729	-1.38883	0.209076	-6.64271	3.08e-11	6.6e-10	chr10:4987400-5018031	-	138.744	155.86	221.632	68.8115	62.348	64.9775
ENSG00000142731.11	PLK4	188.438	-1.38812	0.169339	-8.19728	2.46e-16	8.33e-15	chr4:127880893-127899224	+	290.361	233.79	294.299	124.069	97.1389	90.9686
ENSG00000121621.7	KIF18A	216.469	-1.38695	0.164743	-8.4189	3.8e-17	1.38e-15	chr11:28020619-28108156	-	320.399	265.828	350.615	133.453	100.928	127.592
ENSG00000237234.7	RP1-142L7.5	53.6213	-1.38603	0.284901	-4.86494	1.14e-06	1.38e-05	chr6:112154765-112166476	+	80.0997	76.1983	76.2996	39.6187	28.2461	21.2654
ENSG00000278828.1	H3C10	596.086	-1.38593	0.114112	-12.1453	6.07e-34	6.25e-32	chr6:27810064-27811300	+	871.084	781.033	933.762	292.97	317.251	380.414
ENSG00000152583.13	SPARCL1	35181	-1.38467	0.228382	-6.06298	1.34e-09	2.37e-08	chr4:87473335-87531061	-	48381.6	42416.5	61831.8	20540.2	15322.8	22593.3
ENSG00000136960.13	ENPP2	48.3983	-1.38288	0.30648	-4.51215	6.42e-06	6.7e-05	chr8:119557086-119673453	-	74.3783	84.8572	50.8664	30.2353	29.9684	20.084
ENSG00000111206.13	FOXM1	150.235	-1.38284	0.171794	-8.0494	8.32e-16	2.71e-14	chr12:2857680-2877174	-	228.856	196.557	227.082	82.3652	82.6714	83.8801
ENSG00000168675.19	LDLRAD4	1418.91	-1.38049	0.0951606	-14.5069	1.1e-47	2.12e-45	chr18:13217498-13652755	+	1863.75	1984.62	2298.07	848.675	718.552	799.814
ENSG00000165244.7	ZNF367	262.316	-1.37838	0.14055	-9.80702	1.05e-22	5.45e-21	chr9:96385941-96418370	-	370.461	341.161	428.731	140.751	149.842	142.951
ENSG00000102384.14	CENPI	311.245	-1.37593	0.137468	-10.009	1.39e-23	7.63e-22	chrX:101098188-101166126	+	457.712	396.578	497.764	149.092	180.844	185.481
ENSG00000152952.12	PLOD2	9356.78	-1.37583	0.294546	-4.67101	3e-06	3.36e-05	chr3:146069440-146163653	-	15537.9	11789.1	13198	7087.58	4713.3	3814.77
ENSG00000168961.17	LGALS9	31.1646	-1.37531	0.358632	-3.83487	0.000125633	0.00100593	chr17:27629798-27649560	+	51.4927	38.0992	45.4164	17.7242	16.5343	17.7211
ENSG00000173918.15	C1QTNF1	212.046	-1.37465	0.15423	-8.91301	4.97e-19	2.07e-17	chr17:79022814-79049788	+	258.894	329.904	328.815	113.643	118.151	122.867
ENSG00000164109.14	MAD2L1	390.512	-1.37426	0.128677	-10.68	1.26e-26	8.29e-25	chr4:120055623-120066858	-	585.014	475.374	632.197	218.946	209.434	222.105
ENSG00000047457.14	CP	3450.59	-1.37092	0.452881	-3.02711	0.00246903	0.0135605	chr3:149162410-149221829	-	6140.5	4057.56	4732.39	3014.15	1570.41	1188.5
ENSG00000266946.1	MRPL37P1	19.9126	-1.36975	0.462584	-2.96109	0.00306557	0.0162933	chr18:58690356-58692153	+	22.8856	30.3062	34.5165	8.34078	15.1564	8.26987
ENSG00000051341.15	POLQ	205.186	-1.36904	0.155937	-8.77947	1.64e-18	6.62e-17	chr3:121431431-121545988	-	298.943	262.365	325.182	113.643	105.75	125.229
ENSG00000166979.13	EVA1C	216.314	-1.3683	0.144885	-9.44405	3.59e-21	1.65e-19	chr21:32412006-32515397	+	297.513	317.782	319.732	128.24	118.84	115.778
ENSG00000090889.12	KIF4A	359.198	-1.36757	0.119838	-11.4118	3.65e-30	2.89e-28	chrX:70290104-70420886	+	497.762	497.887	557.714	209.562	194.967	197.295
ENSG00000143878.10	RHOB	5591.87	-1.36755	0.0741585	-18.4409	6.17e-76	2.83e-73	chr2:20447074-20449440	+	8360.4	7915.1	7918.81	3110.07	3404.34	2842.47
ENSG00000125746.18	EML2	23.1662	-1.36459	0.421847	-3.2348	0.00121727	0.00741279	chr19:45606994-45645602	-	31.4677	41.5627	27.2499	9.38338	15.1564	14.1769
ENSG00000169116.11	PARM1	45.6247	-1.36373	0.297287	-4.58724	4.49e-06	4.86e-05	chr4:74933095-75050115	+	68.6569	64.9418	63.583	20.852	26.1793	29.5352
ENSG00000129173.13	E2F8	53.1503	-1.36357	0.286254	-4.7635	1.9e-06	2.22e-05	chr11:19224063-19241620	-	74.3783	64.9418	92.6496	30.2353	33.0686	23.6282
ENSG00000267529.3	RP11-53B2.1	24.547	-1.362	0.441393	-3.08569	0.00203081	0.0114924	chr18:13471012-13472709	-	21.4553	38.0992	45.4164	20.852	9.645	11.8141
ENSG00000278463.2	H2AC4	243.919	-1.36033	0.185096	-7.34931	1.99e-13	5.27e-12	chr6:26033092-26033618	-	401.929	279.682	368.782	111.558	116.084	185.481
ENSG00000154330.13	PGM5	148.327	-1.3603	0.172126	-7.90295	2.72e-15	8.45e-14	chr9:68328308-68531061	+	194.528	214.741	230.716	85.493	80.6046	83.8801
ENSG00000105974.13	CAV1	1111.92	-1.36027	0.316062	-4.3038	1.68e-05	0.000161367	chr7:116524994-116561179	+	1971.02	1333.47	1496.93	843.462	571.81	454.843
ENSG00000135451.13	TROAP	86.7343	-1.35485	0.244764	-5.53534	3.11e-08	4.66e-07	chr12:49323236-49331731	+	165.921	96.9797	112.633	42.7465	51.3252	50.8006
ENSG00000214357.9	NEURL1B	200.419	-1.35205	0.168277	-8.03466	9.38e-16	3.04e-14	chr5:172641263-172691540	+	296.083	246.779	325.182	89.6634	121.94	122.867
ENSG00000131187.10	F12	42.7742	-1.35052	0.330008	-4.0924	4.27e-05	0.000376924	chr5:177402141-177409564	-	82.9604	50.2216	52.6831	17.7242	28.2461	24.8096
ENSG00000248608.2	RP11-206P5.2	58.8574	-1.34989	0.285982	-4.72021	2.36e-06	2.71e-05	chr4:25504997-25506675	+	101.555	78.796	74.483	42.7465	35.4798	20.084
ENSG00000138160.7	KIF11	742.783	-1.34922	0.10882	-12.3987	2.66e-35	2.85e-33	chr10:92574105-92655395	+	1042.73	932.564	1226.24	433.721	396.134	425.308
ENSG00000141448.11	GATA6	24.4456	-1.34861	0.419319	-3.2162	0.00129901	0.0078429	chr18:22169589-22202528	+	38.6195	37.2333	30.8832	8.34078	18.6011	12.9955
ENSG00000143847.15	PPFIA4	1105.58	-1.34847	0.449198	-3.00194	0.00268263	0.0145038	chr1:203026498-203078740	+	2052.55	1129.99	1580.49	942.509	529.786	398.135
ENSG00000172164.15	SNTB1	999.625	-1.3482	0.120842	-11.1567	6.64e-29	4.81e-27	chr8:120535745-120813273	-	1368.85	1226.97	1709.48	649.539	499.473	543.449
ENSG00000116661.11	FBXO2	30.7107	-1.34629	0.409531	-3.28739	0.00101121	0.0063116	chr1:11637018-11655785	-	48.6319	63.21	19.9832	19.8094	19.6345	12.9955
ENSG00000225614.4	ZNF469	17.3001	-1.34596	0.494425	-2.72228	0.00648336	0.0306795	chr16:88382959-88440757	+	30.0374	15.586	29.0665	8.34078	8.95607	11.8141
ENSG00000111247.15	RAD51AP1	93.1545	-1.34547	0.228293	-5.8936	3.78e-09	6.37e-08	chr12:4538798-4560047	+	135.883	110.834	152.599	56.3003	43.058	60.2519
ENSG00000162745.11	OLFML2B	193.158	-1.34411	0.156532	-8.58684	8.94e-18	3.39e-16	chr1:161983192-162023869	-	310.386	277.085	243.432	109.473	109.884	108.69
ENSG00000158402.21	CDC25C	68.5221	-1.34175	0.252345	-5.31711	1.05e-07	1.47e-06	chr5:138285269-138338355	-	110.137	81.3937	105.366	34.4057	42.0246	37.8051
ENSG00000178852.16	EFCAB13	689.882	-1.34144	0.112428	-11.9316	8.1e-33	7.93e-31	chr17:47323290-47441312	+	1062.75	994.908	911.962	447.275	397.512	324.888
ENSG00000171004.18	HS6ST2	1144.88	-1.3387	0.0871949	-15.353	3.38e-53	8.25e-51	chrX:132626016-132961395	-	1557.65	1615.75	1743.99	682.902	603.846	665.134
ENSG00000116981.4	NT5C1A	47.3747	-1.33811	0.302724	-4.42022	9.86e-06	9.97e-05	chr1:39651229-39672107	-	54.3534	64.9418	83.5663	26.065	23.4236	31.8981
ENSG00000138193.16	PLCE1	1488.86	-1.3369	0.0962833	-13.885	7.81e-44	1.33e-41	chr10:93993931-94332823	+	2038.25	2049.56	2319.87	926.87	881.484	717.116
ENSG00000259367.1	RP11-815J21.4	21.5179	-1.33643	0.444983	-3.00333	0.00267041	0.0144501	chr15:85619623-85670948	-	32.8981	24.2449	34.5165	10.426	9.30053	17.7211
ENSG00000279587.1	RP1-278D1.2	42.7562	-1.33634	0.305192	-4.3787	1.19e-05	0.000118557	chrX:117894632-117895683	-	55.7837	65.8076	61.7664	21.8946	24.1125	27.1724
ENSG00000174804.4	FZD4	373.582	-1.33587	0.120389	-11.0962	1.31e-28	9.23e-27	chr11:86945679-86955395	-	513.496	522.132	566.797	230.414	196	212.654
ENSG00000156802.13	ATAD2	1306.61	-1.33402	0.100647	-13.2544	4.25e-40	5.92e-38	chr8:123319850-123416350	-	1737.88	1692.82	2181.81	763.182	691.34	772.642
ENSG00000169607.13	CKAP2L	167.779	-1.33345	0.175824	-7.584	3.35e-14	9.54e-13	chr2:112736349-112764664	-	268.906	205.216	245.249	87.5782	87.4939	112.234
ENSG00000117266.16	CDK18	135.711	-1.33234	0.195754	-6.8062	1e-11	2.27e-10	chr1:205504596-205532793	+	227.426	168.849	190.749	63.5985	89.2162	74.4288
ENSG00000168685.15	IL7R	41.4293	-1.33222	0.31665	-4.20722	2.59e-05	0.000238735	chr5:35852695-35879603	+	57.2141	51.0875	70.8497	26.065	24.457	18.9026
ENSG00000168453.16	HR	22.5467	-1.33118	0.437654	-3.04164	0.00235293	0.0130242	chr8:22114419-22133384	-	41.4802	30.3062	23.6166	12.5112	9.645	17.7211
ENSG00000179388.9	EGR3	58.6279	-1.32995	0.315874	-4.21038	2.55e-05	0.000235747	chr8:22687659-22693480	-	84.3907	58.8805	107.183	25.0224	25.4903	50.8006
ENSG00000105011.9	ASF1B	179.549	-1.32976	0.158001	-8.41611	3.89e-17	1.41e-15	chr19:14119512-14136613	-	277.488	256.303	236.166	99.0468	101.961	106.327
ENSG00000003096.14	KLHL13	4530.25	-1.32801	0.0678324	-19.5779	2.39e-85	1.31e-82	chrX:117897813-118117340	-	6166.25	6471.66	6796.12	2533.51	2499.09	2714.88
ENSG00000197299.13	BLM	135.255	-1.32623	0.192146	-6.90224	5.12e-12	1.2e-10	chr15:90717346-90816166	+	187.376	163.653	230.716	66.7263	76.8155	86.2429
ENSG00000008086.13	CDKL5	1070.56	-1.3248	0.0895335	-14.7967	1.54e-49	3.24e-47	chrX:18425583-18653629	+	1526.18	1562.93	1491.48	602.622	563.199	676.948
ENSG00000166803.14	PCLAF	170.475	-1.32459	0.168087	-7.88037	3.26e-15	1e-13	chr15:64364304-64387687	-	247.451	212.143	274.315	101.132	99.2057	88.6057
ENSG00000232913.8	PLCE1-AS2	16.7348	-1.32384	0.502281	-2.63567	0.0083972	0.0381027	chr10:94081950-94108814	-	22.8856	19.0496	29.0665	8.34078	6.88928	14.1769
ENSG00000024422.12	EHD2	273.283	-1.31972	0.151058	-8.73647	2.41e-18	9.51e-17	chr19:47713422-47743134	+	429.105	317.782	423.281	152.219	143.642	173.667
ENSG00000163898.10	LIPH	1275.05	-1.31876	0.105919	-12.4506	1.39e-35	1.55e-33	chr3:185506262-185552588	-	1835.14	1921.41	1709.48	814.269	784	585.979
ENSG00000205795.4	CYS1	110.56	-1.31691	0.194242	-6.77974	1.2e-11	2.7e-10	chr2:10056780-10080944	-	158.769	148.067	167.133	62.5559	63.0369	63.7961
ENSG00000144554.13	FANCD2	394.335	-1.31586	0.135878	-9.68409	3.52e-22	1.75e-20	chr3:10026370-10101932	+	533.521	473.642	684.88	219.988	225.968	228.012
ENSG00000119922.11	IFIT2	580.103	-1.31571	0.119764	-10.9858	4.47e-28	3.1e-26	chr10:89283694-89309271	+	799.566	855.499	817.496	331.546	280.738	395.772
ENSG00000153714.6	LURAP1L	106.127	-1.31566	0.224418	-5.86255	4.56e-09	7.61e-08	chr9:12775020-12823060	+	148.757	120.359	187.116	74.0245	59.2478	47.2564
ENSG00000272870.3	SAP30-DT	83.7473	-1.31305	0.249877	-5.25476	1.48e-07	2.03e-06	chr4:173349543-173370721	-	117.289	101.309	141.699	62.5559	48.9139	30.7167
ENSG00000182253.15	SYNM	8424.26	-1.31291	0.0649574	-20.2118	7.7e-91	5.07e-88	chr15:99098217-99135593	+	11654.5	11691.2	12705.7	4799.08	5045.02	4650.03
ENSG00000100784.12	RPS6KA5	255.215	-1.31276	0.146493	-8.96124	3.21e-19	1.36e-17	chr14:90847861-91060641	-	323.259	348.954	417.831	142.836	135.374	163.035
ENSG00000127564.17	PKMYT1	57.8085	-1.31177	0.277605	-4.72531	2.3e-06	2.64e-05	chr16:2968024-2980479	-	74.3783	83.9913	90.8329	22.9372	39.2689	35.4423
ENSG00000074706.13	IPCEF1	36.4853	-1.31164	0.331936	-3.95149	7.77e-05	0.000649216	chr6:154154496-154356792	-	47.2016	52.8193	56.3164	25.0224	21.0123	16.5397
ENSG00000277157.2	H4C4	894.73	-1.31126	0.306233	-4.28191	1.85e-05	0.000176409	chr6:26188710-26189112	-	1619.16	917.843	1288.01	571.344	381.322	590.705
ENSG00000146670.10	CDCA5	134.01	-1.31043	0.184564	-7.1001	1.25e-12	3.09e-11	chr11:65066300-65084164	-	190.237	181.837	198.016	78.1949	67.1705	88.6057
ENSG00000213853.10	EMP2	504.394	-1.30779	0.111875	-11.6897	1.44e-31	1.29e-29	chr16:10528422-10580632	-	730.91	665.869	755.73	317.992	265.237	290.627
ENSG00000123505.19	AMD1	5228.22	-1.30607	0.0960194	-13.6021	3.89e-42	5.87e-40	chr6:110874770-110898879	+	7565.13	7106.36	7664.48	3592.79	2858.02	2582.56
ENSG00000142149.9	HUNK	298.073	-1.30532	0.135977	-9.59958	8.03e-22	3.91e-20	chr21:31873020-32044633	+	384.765	460.653	430.548	179.327	184.288	148.858
ENSG00000133101.10	CCNA1	29.1166	-1.30478	0.388294	-3.36028	0.00077863	0.00501189	chr13:36431520-36442870	+	45.7712	33.7697	45.4164	9.38338	17.9121	22.4468
ENSG00000109674.4	NEIL3	112.735	-1.30465	0.199774	-6.53064	6.55e-11	1.34e-09	chr4:177309874-177362936	+	171.642	135.079	176.216	62.5559	64.7593	66.159
ENSG00000142583.18	SLC2A5	25.3435	-1.30342	0.41713	-3.12473	0.00177966	0.010268	chr1:9035106-9088478	-	45.7712	38.0992	23.6166	20.852	13.0896	10.6327
ENSG00000145536.15	ADAMTS16	4985.45	-1.30234	0.0752003	-17.3183	3.42e-67	1.23e-64	chr5:5140330-5320304	+	6907.17	7054.41	7330.21	2571.05	3069.18	2980.7
ENSG00000196787.3	H2AC11	583.455	-1.29964	0.148587	-8.74671	2.2e-18	8.75e-17	chr6:27133042-27135291	+	816.731	645.088	1026.41	390.974	282.461	339.065
ENSG00000049323.16	LTBP1	10332.1	-1.29874	0.0707896	-18.3464	3.52e-75	1.55e-72	chr2:32946953-33399509	+	14658.2	14032.6	15383.5	6509.98	5679.87	5728.66
ENSG00000189212.12	DPY19L2P1	44.9305	-1.2986	0.30112	-4.31255	1.61e-05	0.000155672	chr7:35079989-35186041	-	75.8086	63.21	52.6831	25.0224	26.8682	25.991
ENSG00000134057.15	CCNB1	804.624	-1.29813	0.094359	-13.7574	4.6e-43	7.45e-41	chr5:69167135-69178245	+	1197.2	1062.45	1169.93	487.936	438.847	471.383
ENSG00000111319.13	SCNN1A	24.5221	-1.29704	0.431273	-3.00748	0.00263426	0.0142814	chr12:6346843-6377730	-	27.1767	40.6968	38.1498	7.29819	19.6345	14.1769
ENSG00000161800.13	RACGAP1	501.913	-1.296	0.11666	-11.1092	1.13e-28	8.04e-27	chr12:49976923-50033136	-	706.594	630.368	806.596	268.99	291.761	307.167
ENSG00000010818.10	HIVEP2	138.291	-1.2955	0.195128	-6.63925	3.15e-11	6.75e-10	chr6:142751469-142956698	-	213.122	154.128	223.449	90.706	75.0932	73.2474
ENSG00000163507.14	CIP2A	339.985	-1.29507	0.135519	-9.55634	1.22e-21	5.81e-20	chr3:108549864-108589644	-	470.586	418.225	564.981	180.369	202.545	203.202
ENSG00000080986.13	NDC80	247.519	-1.29423	0.156172	-8.28722	1.16e-16	4.03e-15	chr18:2571557-2616635	+	320.399	309.989	423.281	148.049	127.452	155.946
ENSG00000172716.16	SLFN11	1241.69	-1.2939	0.105591	-12.2539	1.6e-34	1.69e-32	chr17:35350305-35373701	-	1746.46	1581.12	1963.81	836.164	661.027	661.59
ENSG00000068489.13	PRR11	393.101	-1.2938	0.118468	-10.9211	9.13e-28	6.25e-26	chr17:59155732-59206709	+	585.014	504.814	586.781	237.712	222.179	222.105
ENSG00000106689.11	LHX2	16.9159	-1.29317	0.487521	-2.65254	0.00798891	0.0365861	chr9:124001670-124033301	+	24.316	25.1108	23.6166	6.25559	12.7452	9.45128
ENSG00000155090.15	KLF10	112.438	-1.29311	0.208329	-6.20707	5.4e-10	9.95e-09	chr8:102648784-102655725	-	144.465	142.006	192.566	56.3003	61.3146	77.9731
ENSG00000123453.18	SARDH	30.6282	-1.29213	0.362437	-3.56511	0.000363703	0.0025853	chr9:133663560-133739955	-	37.1891	48.4898	43.5998	17.7242	15.5009	21.2654
ENSG00000184661.14	CDCA2	205.003	-1.29178	0.156755	-8.24078	1.71e-16	5.91e-15	chr8:25459199-25507911	+	306.095	249.376	319.732	126.154	116.429	112.234
ENSG00000172794.20	RAB37	16.6838	-1.29024	0.496507	-2.59863	0.00935957	0.0416377	chr17:74670578-74747335	+	27.1767	22.5131	21.7999	13.5538	10.3339	4.72564
ENSG00000160179.19	ABCG1	301.882	-1.28373	0.157031	-8.17504	2.96e-16	9.91e-15	chr21:42199689-42297244	+	377.613	436.409	463.248	164.73	143.642	225.649
ENSG00000140525.19	FANCI	764.944	-1.28256	0.0975093	-13.1532	1.63e-39	2.19e-37	chr15:89243945-89317261	+	1038.44	1013.96	1200.81	455.615	429.547	451.299
ENSG00000179111.9	HES7	18.9748	-1.28021	0.468362	-2.73339	0.00626868	0.0298279	chr17:8120592-8124106	-	24.316	23.379	34.5165	10.426	14.123	7.08846
ENSG00000180347.14	ITPRID1	59.1326	-1.28003	0.27486	-4.65701	3.21e-06	3.58e-05	chr7:31514090-31658720	+	97.2639	69.2712	83.5663	40.6613	28.5905	35.4423
ENSG00000136492.10	BRIP1	300.8	-1.27493	0.129003	-9.88295	4.94e-23	2.61e-21	chr17:61679139-61863559	-	413.372	411.298	452.348	161.603	173.61	192.57
ENSG00000233532.6	LINC00460	297.245	-1.27255	0.1327	-9.58966	8.84e-22	4.27e-20	chr13:106374477-106384315	+	410.511	403.505	450.531	190.795	178.088	150.039
ENSG00000164047.6	CAMP	135.711	-1.27072	0.18095	-7.02247	2.18e-12	5.29e-11	chr3:48223347-48225491	+	173.073	206.948	194.382	88.6208	76.8155	74.4288
ENSG00000128805.15	ARHGAP22	166.266	-1.26536	0.183217	-6.90634	4.97e-12	1.17e-10	chr10:48446036-48656265	-	243.16	211.277	254.332	70.8967	111.606	106.327
ENSG00000099250.18	NRP1	4958.63	-1.26478	0.185928	-6.80253	1.03e-11	2.32e-10	chr10:33177492-33336262	-	8157.29	5961.65	6890.58	3419.72	2813.24	2509.31
ENSG00000112149.10	CD83	387.592	-1.26233	0.123205	-10.2457	1.24e-24	7.17e-23	chr6:14117256-14136918	+	522.078	522.998	592.23	225.201	206.678	256.366
ENSG00000246228.6	CASC8	24.3186	-1.26173	0.448178	-2.81526	0.00487383	0.0241703	chr8:127289817-127482139	-	18.5946	39.8309	43.5998	9.38338	12.0562	22.4468
ENSG00000100968.14	NFATC4	73.0558	-1.26113	0.24612	-5.12404	2.99e-07	3.91e-06	chr14:24365673-24379604	+	121.58	97.8456	89.0162	52.1299	39.9578	37.8051
ENSG00000063660.9	GPC1	6447.38	-1.26088	0.0807038	-15.6236	5.03e-55	1.33e-52	chr2:240435663-240468076	+	9158.54	9336.03	8803.52	3287.31	4033.67	4065.23
ENSG00000006638.13	TBXA2R	20.4897	-1.26064	0.461647	-2.73075	0.00631907	0.0300027	chr19:3594507-3606875	-	34.3284	25.9767	27.2499	5.21299	14.812	15.3583
ENSG00000115041.13	KCNIP3	202.51	-1.25914	0.150414	-8.37117	5.7e-17	2.03e-15	chr2:95297327-95386077	+	293.222	271.889	290.665	112.601	114.362	132.318
ENSG00000169129.15	AFAP1L2	34.3105	-1.25875	0.360871	-3.48808	0.000486504	0.00332542	chr10:114294824-114404756	-	45.7712	46.7581	52.6831	30.2353	18.6011	11.8141
ENSG00000154864.13	PIEZO2	723.162	-1.25869	0.0960853	-13.0997	3.31e-39	4.33e-37	chr18:10666483-11149569	-	998.385	985.383	1080.91	450.402	434.025	389.865
ENSG00000184916.9	JAG2	132.23	-1.25862	0.190674	-6.60093	4.09e-11	8.65e-10	chr14:105140982-105168824	-	214.553	157.592	190.749	74.0245	84.3937	72.066
ENSG00000176244.7	ACBD7	84.758	-1.257	0.229649	-5.47357	4.41e-08	6.52e-07	chr10:15075475-15088776	-	127.301	119.493	114.449	39.6187	59.2478	48.4378
ENSG00000109846.9	CRYAB	834.488	-1.25548	0.104867	-11.9721	4.97e-33	4.99e-31	chr11:111908564-111923722	-	1157.15	1064.18	1317.08	509.83	523.93	434.759
ENSG00000176890.16	TYMS	125.517	-1.25541	0.202321	-6.20501	5.47e-10	1.01e-08	chr18:657653-673578	+	180.224	148.067	207.099	77.1523	82.6714	57.8891
ENSG00000138798.13	EGF	224.198	-1.25479	0.148778	-8.43394	3.34e-17	1.22e-15	chr4:109912883-110013766	+	326.12	333.368	290.665	138.666	142.953	113.415
ENSG00000169862.19	CTNND2	622.192	-1.25336	0.100238	-12.5039	7.11e-36	7.99e-34	chr5:10971836-11904446	-	883.957	843.377	910.146	347.185	394.067	354.423
ENSG00000225768.1	LINC02620	75.5118	-1.24882	0.243692	-5.12458	2.98e-07	3.91e-06	chr10:104474939-104480274	-	123.01	89.1867	107.183	53.1725	42.7136	37.8051
ENSG00000183087.15	GAS6	184.511	-1.24814	0.171584	-7.27424	3.48e-13	9.08e-12	chr13:113820549-113864076	-	306.095	234.656	239.799	126.154	110.573	89.7871
ENSG00000198121.14	LPAR1	338.217	-1.24704	0.132336	-9.42324	4.37e-21	1.99e-19	chr9:110873263-111038470	-	444.839	481.435	495.948	230.414	174.643	202.021
ENSG00000134755.18	DSC2	25.2496	-1.24539	0.402327	-3.09547	0.001965	0.0111652	chr18:31058840-31102522	-	38.6195	37.2333	30.8832	19.8094	15.5009	9.45128
ENSG00000146038.12	DCDC2	245.548	-1.24527	0.154981	-8.03496	9.36e-16	3.03e-14	chr6:24171755-24358059	-	366.17	317.782	350.615	181.412	130.896	126.411
ENSG00000259932.1	CTD-2651B20.7	69.5081	-1.24109	0.261851	-4.73968	2.14e-06	2.47e-05	chr15:45198517-45199139	-	130.162	82.2596	79.9329	42.7465	38.2355	43.7122
ENSG00000075702.19	WDR62	177.102	-1.24035	0.164769	-7.52783	5.16e-14	1.44e-12	chr19:36054649-36105108	+	220.274	266.694	257.965	93.8338	103.339	120.504
ENSG00000175264.8	CHST1	86.1635	-1.24007	0.241149	-5.14234	2.71e-07	3.58e-06	chr11:45647689-45665622	-	125.871	105.639	136.249	51.0873	62.6925	35.4423
ENSG00000187773.9	DIPK1C	33.3022	-1.23946	0.381127	-3.2521	0.00114556	0.00705214	chr18:74434775-74457944	-	62.9355	33.7697	45.4164	23.9798	23.0791	10.6327
ENSG00000092470.12	WDR76	395.623	-1.23871	0.127585	-9.7089	2.76e-22	1.38e-20	chr15:43826980-43868412	+	470.586	561.097	634.014	232.499	223.902	251.64
ENSG00000120833.14	SOCS2	398.37	-1.2384	0.116989	-10.5856	3.47e-26	2.19e-24	chr12:93569814-93583487	+	522.078	575.817	584.964	223.116	253.87	230.375
ENSG00000275491.1	LINC01730	19.6709	-1.23813	0.447312	-2.76794	0.00564122	0.0273964	chr20:3808357-3812434	+	28.607	28.5744	25.4332	8.34078	11.7118	15.3583
ENSG00000100526.20	CDKN3	201.073	-1.23779	0.166129	-7.45076	9.28e-14	2.53e-12	chr14:54396849-54420218	+	297.513	247.645	303.382	94.8764	121.251	141.769
ENSG00000129244.9	ATP1B2	353.147	-1.23779	0.124238	-9.96299	2.21e-23	1.2e-21	chr17:7646627-7657770	+	540.673	457.19	494.131	193.923	221.49	211.472
ENSG00000146410.12	MTFR2	30.402	-1.23655	0.372047	-3.32364	0.000888501	0.00562565	chr6:136231024-136250335	-	52.923	32.9038	43.5998	14.5964	20.6678	17.7211
ENSG00000119969.15	HELLS	449.673	-1.23565	0.126223	-9.7894	1.25e-22	6.45e-21	chr10:94501434-94613905	+	605.039	566.292	719.397	271.075	237.336	298.897
ENSG00000165633.13	VSTM4	18.2928	-1.2356	0.470259	-2.62748	0.00860198	0.0388623	chr10:49014236-49115522	-	24.316	30.3062	21.7999	7.29819	10.6784	15.3583
ENSG00000123560.14	PLP1	463.054	-1.23441	0.147698	-8.35767	6.4e-17	2.27e-15	chrX:103773718-103792619	+	580.723	548.974	821.129	324.248	250.425	252.822
ENSG00000118785.15	SPP1	61377.3	-1.2331	0.0732362	-16.8373	1.3e-63	4.28e-61	chr4:87975667-87983532	+	88554.5	87196	82603.4	40691.6	35481.9	33736.3
ENSG00000119917.15	IFIT3	343.817	-1.2318	0.16539	-7.44785	9.49e-14	2.58e-12	chr10:89327307-89377473	+	450.561	535.986	450.531	205.392	152.253	268.18
ENSG00000122547.11	EEPD1	817.158	-1.22986	0.109891	-11.1916	4.48e-29	3.27e-27	chr7:36153254-36301538	+	1200.06	957.674	1284.38	512.958	481.216	466.657
ENSG00000185130.5	H2BC13	180.141	-1.22847	0.171894	-7.14668	8.89e-13	2.24e-11	chr6:27807444-27807931	-	277.488	225.997	250.699	102.175	93.3498	131.136
ENSG00000279965.1	RP11-472K17.3	52.1981	-1.22813	0.290176	-4.23236	2.31e-05	0.000216068	chr13:110123208-110125234	+	71.5176	57.1487	92.6496	32.3205	32.3796	27.1724
ENSG00000087586.18	AURKA	363.375	-1.22754	0.125414	-9.78786	1.27e-22	6.53e-21	chr20:56369389-56392337	-	513.496	449.397	568.614	223.116	217.701	207.928
ENSG00000165072.10	MAMDC2	481.587	-1.22663	0.111971	-10.9548	6.3e-28	4.32e-26	chr9:70043848-70226972	+	689.429	615.648	717.58	288.8	269.715	308.348
ENSG00000154556.18	SORBS2	534.564	-1.22661	0.109102	-11.2428	2.51e-29	1.89e-27	chr4:185585444-185956652	-	740.922	680.59	826.579	311.737	309.673	337.883
ENSG00000188610.12	FAM72B	69.6359	-1.22607	0.25397	-4.8276	1.38e-06	1.65e-05	chr1:121167646-121185539	-	102.985	83.9913	105.366	53.1725	36.8577	35.4423
ENSG00000154839.10	SKA1	39.5969	-1.22361	0.323097	-3.78714	0.000152392	0.00119548	chr18:50375040-50394168	+	67.2265	49.3557	49.0498	21.8946	21.7012	28.3538
ENSG00000164045.12	CDC25A	154.466	-1.22274	0.174563	-7.00461	2.48e-12	5.95e-11	chr3:48157146-48188417	-	191.667	211.277	248.882	84.4504	99.5501	90.9686
ENSG00000134198.10	TSPAN2	87.9308	-1.22254	0.291013	-4.20098	2.66e-05	0.000244492	chr1:115048011-115089503	-	138.744	103.041	128.983	81.3226	53.0475	22.4468
ENSG00000158164.7	TMSB15A	31.1948	-1.21987	0.359929	-3.38919	0.00070099	0.00457624	chrX:102513682-102516739	-	42.9105	35.5015	52.6831	18.7668	17.2232	20.084
ENSG00000198517.10	MAFK	625.465	-1.21934	0.105606	-11.5462	7.72e-31	6.41e-29	chr7:1530702-1543043	+	906.843	877.147	848.379	334.674	417.146	368.6
ENSG00000276644.5	DACH1	328.315	-1.21658	0.133605	-9.10581	8.56e-20	3.7e-18	chr13:71437966-71867204	-	426.245	429.481	526.831	207.477	207.367	172.486
ENSG00000278971.1	RP11-644A7.2	19.3283	-1.21596	0.465302	-2.61328	0.00896785	0.0402118	chr18:70489630-70491205	+	20.0249	24.2449	36.3332	14.5964	8.95607	11.8141
ENSG00000104147.9	OIP5	28.1493	-1.21529	0.369853	-3.28588	0.00101663	0.00634142	chr15:41309273-41332591	-	38.6195	40.6968	38.1498	16.6816	15.8454	18.9026
ENSG00000177679.16	SRRM3	154.118	-1.2141	0.173338	-7.00423	2.48e-12	5.96e-11	chr7:76201896-76287288	+	225.996	235.522	181.666	96.9616	88.8717	95.6942
ENSG00000261054.1	RP11-6O2.4	29.8486	-1.21371	0.378216	-3.20903	0.00133183	0.00800194	chr15:99128832-99131806	-	37.1891	45.8922	39.9665	20.852	12.7452	22.4468
ENSG00000236460.1	SNX2P2	23.0144	-1.20665	0.457366	-2.63826	0.00833326	0.0378821	chr7:31941261-31941583	+	14.3035	45.8922	36.3332	13.5538	16.1898	11.8141
ENSG00000266074.10	BAHCC1	26.2803	-1.20501	0.4033	-2.98786	0.00280935	0.0150939	chr17:81395457-81466332	+	34.3284	28.5744	47.2331	11.4686	14.812	21.2654
ENSG00000165490.13	DDIAS	65.2172	-1.20412	0.25196	-4.77901	1.76e-06	2.07e-05	chr11:82899975-82958277	+	101.555	82.2596	90.8329	35.4483	43.4025	37.8051
ENSG00000230570.1	RP11-69L16.6	18.0366	-1.20122	0.467756	-2.56804	0.0102274	0.0447429	chr6:7340854-7342056	-	21.4553	23.379	30.8832	13.5538	10.6784	8.26987
ENSG00000107798.18	LIPA	3263.92	-1.20075	0.0793379	-15.1346	9.58e-52	2.13e-49	chr10:89213569-89414557	-	4558.53	4349.37	4741.48	2190.5	1945.53	1798.11
ENSG00000128283.7	CDC42EP1	324.122	-1.20072	0.148883	-8.06481	7.33e-16	2.4e-14	chr22:37560480-37569405	+	494.902	443.336	425.098	170.986	241.469	168.942
ENSG00000143502.16	SUSD4	564.29	-1.20025	0.103	-11.653	2.22e-31	1.97e-29	chr1:223220819-223364233	-	769.529	743.8	844.746	340.93	327.585	359.149
ENSG00000186871.7	ERCC6L	183.506	-1.20021	0.173826	-6.90466	5.03e-12	1.18e-10	chrX:72204657-72239027	-	251.742	206.948	312.465	111.558	114.362	103.964
ENSG00000231991.4	ANXA2P2	42.516	-1.2	0.32492	-3.69321	0.000221437	0.00166115	chr9:33624274-33625293	+	47.2016	75.3324	52.6831	28.1501	21.0123	30.7167
ENSG00000112297.18	CRYBG1	1011.15	-1.19966	0.0916153	-13.0946	3.54e-39	4.6e-37	chr6:106360717-106572017	+	1456.1	1312.69	1453.33	654.752	563.888	626.147
ENSG00000135905.20	DOCK10	10922.8	-1.19891	0.0948428	-12.6411	1.25e-36	1.47e-34	chr2:224765090-225042468	-	14242	13630	17776	6720.59	5952.34	7216.05
ENSG00000029534.21	ANK1	223.641	-1.19855	0.146493	-8.18156	2.8e-16	9.45e-15	chr8:41653220-41896762	-	330.411	315.184	288.849	151.177	135.719	120.504
ENSG00000112312.10	GMNN	307.188	-1.19694	0.136854	-8.74609	2.21e-18	8.78e-17	chr6:24774931-24786099	+	387.625	392.248	505.031	181.412	181.877	194.933
ENSG00000165238.16	WNK2	154.034	-1.19564	0.175859	-6.79885	1.05e-11	2.38e-10	chr9:93184916-93320572	+	184.515	212.143	248.882	84.4504	98.5167	95.6942
ENSG00000088325.16	TPX2	518.739	-1.19331	0.120395	-9.91164	3.71e-23	1.98e-21	chr20:31739271-31801805	+	703.733	637.295	826.579	283.587	310.362	350.879
ENSG00000112769.20	LAMA4	7048.73	-1.19299	0.0603432	-19.7701	5.39e-87	3.13e-84	chr6:112107931-112254939	-	9414.57	9882.4	10129.7	4275.69	4344.04	4245.99
ENSG00000125319.15	HROB	51.3109	-1.19276	0.305188	-3.90828	9.3e-05	0.000763472	chr17:44141906-44162476	+	82.9604	54.5511	79.9329	23.9798	39.2689	27.1724
ENSG00000141384.13	TAF4B	101.441	-1.19273	0.236829	-5.03625	4.75e-07	6.06e-06	chr18:26226445-26391685	+	121.58	115.163	185.299	69.8541	48.225	68.5218
ENSG00000127423.11	AUNIP	40.8613	-1.19218	0.31842	-3.74405	0.000181075	0.00138906	chr1:25831913-25859458	-	57.2141	54.5511	58.1331	18.7668	23.4236	33.0795
ENSG00000197747.9	S100A10	911.425	-1.1911	0.101127	-11.7783	5.05e-32	4.69e-30	chr1:151982915-151993859	-	1310.2	1091.89	1406.09	565.088	551.832	543.449
ENSG00000162433.15	AK4	978.788	-1.18964	0.454492	-2.61752	0.0088572	0.039806	chr1:65147549-65232145	+	1736.45	1125.66	1220.79	912.273	543.22	334.339
ENSG00000008513.16	ST3GAL1	3358.85	-1.18919	0.0684962	-17.3614	1.62e-67	5.92e-65	chr8:133454848-133571940	-	4401.19	4818.68	4785.08	2009.09	2013.74	2125.36
ENSG00000231742.6	LINC01273	22.3186	-1.18861	0.416129	-2.85635	0.00428537	0.0217025	chr20:50171809-50176676	+	32.8981	27.7085	32.6998	11.4686	13.7786	15.3583
ENSG00000203760.9	CENPW	92.0105	-1.18803	0.220348	-5.3916	6.98e-08	1e-06	chr6:126340115-126348875	+	131.592	119.493	130.799	49.0021	50.2918	70.8846
ENSG00000130052.14	STARD8	27.9893	-1.18798	0.378963	-3.13481	0.00171963	0.00997891	chrX:68647666-68725842	+	48.6319	38.9651	29.0665	15.639	17.9121	17.7211
ENSG00000134690.11	CDCA8	141.888	-1.18699	0.183655	-6.46316	1.03e-10	2.04e-09	chr1:37692481-37709719	+	190.237	176.642	225.266	74.0245	84.7382	100.42
ENSG00000175305.18	CCNE2	150.312	-1.18673	0.182226	-6.5124	7.4e-11	1.5e-09	chr8:94879770-94896678	-	170.212	206.082	252.515	91.7486	95.0721	86.2429
ENSG00000067057.18	PFKP	6766.7	-1.1862	0.249823	-4.74815	2.05e-06	2.38e-05	chr10:3066333-3137718	+	11165.3	8234.61	8805.34	5268.25	3884.87	3241.79
ENSG00000074410.14	CA12	3232.85	-1.18235	0.102367	-11.5502	7.37e-31	6.14e-29	chr15:63321378-63381846	-	4572.83	3984.83	4899.53	2242.63	1653.43	2043.84
ENSG00000228716.7	DHFR	1382.12	-1.18214	0.0950699	-12.4344	1.7e-35	1.88e-33	chr5:80626226-80654983	-	1749.32	1784.6	2227.22	859.101	844.282	828.168
ENSG00000125895.6	TMEM74B	20.2218	-1.18205	0.439292	-2.6908	0.00712811	0.0332135	chr20:1180561-1185415	-	27.1767	25.9767	30.8832	15.639	11.0229	10.6327
ENSG00000091651.9	ORC6	406.868	-1.18196	0.134052	-8.81713	1.17e-18	4.81e-17	chr16:46689643-46698394	+	500.623	587.939	603.13	207.477	240.78	301.26
ENSG00000133321.11	PLAAT4	72.6622	-1.18147	0.242879	-4.86446	1.15e-06	1.38e-05	chr11:63536808-63546462	+	114.428	94.382	94.4662	52.1299	45.1248	35.4423
ENSG00000246985.8	SOCS2-AS1	41.2322	-1.18056	0.325423	-3.62777	0.000285884	0.00208849	chr12:93542022-93571768	-	64.3658	43.2945	65.3997	18.7668	27.2127	28.3538
ENSG00000100479.13	POLE2	45.3739	-1.18051	0.292907	-4.03031	5.57e-05	0.000478381	chr14:49643555-49688422	-	64.3658	59.7464	65.3997	28.1501	28.5905	25.991
ENSG00000020181.18	ADGRA2	122.567	-1.17989	0.199877	-5.9031	3.57e-09	6.03e-08	chr8:37784191-37844896	+	151.617	165.385	192.566	93.8338	68.2039	63.7961
ENSG00000165480.16	SKA3	77.4228	-1.17948	0.252341	-4.67414	2.95e-06	3.31e-05	chr13:21153595-21176552	-	81.53	104.773	134.433	55.2577	38.9244	49.6192
ENSG00000116016.14	EPAS1	1264.79	-1.17924	0.0935008	-12.6121	1.81e-36	2.1e-34	chr2:46293667-46386697	+	1782.22	1638.26	1852.99	827.823	816.38	671.041
ENSG00000159259.8	CHAF1B	88.5684	-1.17606	0.219172	-5.36589	8.05e-08	1.14e-06	chr21:36385392-36419015	+	125.871	128.152	116.266	55.2577	60.9702	44.8936
ENSG00000198901.14	PRC1	22.7774	-1.17543	0.443049	-2.65305	0.00797683	0.0365731	chr15:90966040-90995629	-	21.4553	28.5744	45.4164	8.34078	15.1564	17.7211
ENSG00000144655.15	CSRNP1	212.171	-1.17537	0.165952	-7.08258	1.41e-12	3.49e-11	chr3:39141855-39154562	-	257.463	341.161	287.032	117.814	152.598	116.96
ENSG00000148204.12	CRB2	33.8252	-1.17197	0.347137	-3.37611	0.000735173	0.00476632	chr9:123356170-123380324	+	48.6319	39.8309	52.6831	15.639	21.3568	24.8096
ENSG00000111665.12	CDCA3	109.24	-1.17174	0.206937	-5.66231	1.49e-08	2.33e-07	chr12:6844793-6851292	-	127.301	141.14	185.299	68.8115	62.0035	70.8846
ENSG00000283160.1	MIR4521	21.9326	-1.17058	0.429534	-2.72523	0.00642574	0.0304433	chr17:8186945-8187004	+	35.7588	22.5131	32.6998	13.5538	11.7118	15.3583
ENSG00000159200.18	RCAN1	2681.86	-1.16966	0.0767782	-15.2342	2.1e-52	4.82e-50	chr21:34513142-34615113	-	3485.77	4053.23	3600.62	1623.33	1714.4	1613.81
ENSG00000133131.15	MORC4	1326.03	-1.16826	0.0842032	-13.8743	9.07e-44	1.52e-41	chrX:106813871-107000212	-	1883.77	1706.67	1912.94	855.973	767.466	829.35
ENSG00000164104.12	HMGB2	732.315	-1.16764	0.100517	-11.6164	3.4e-31	2.99e-29	chr4:173331376-173334432	-	1061.32	897.062	1084.54	459.786	439.881	451.299
ENSG00000130303.14	BST2	159.414	-1.16602	0.172118	-6.77455	1.25e-11	2.8e-10	chr19:17402939-17405630	-	197.388	218.204	248.882	85.493	106.095	100.42
ENSG00000176171.11	BNIP3	4986.35	-1.16534	0.355564	-3.27745	0.00104751	0.00651758	chr10:131966455-131982013	-	7995.66	5842.16	6854.25	4462.32	2610	2153.71
ENSG00000117399.14	CDC20	261.429	-1.16478	0.132109	-8.8168	1.18e-18	4.82e-17	chr1:43358981-43363203	+	361.879	367.137	354.248	156.39	158.798	170.123
ENSG00000084444.14	FAM234B	265.099	-1.16475	0.146314	-7.96058	1.71e-15	5.45e-14	chr12:13044381-13142521	+	427.675	339.429	336.082	172.029	173.61	141.769
ENSG00000168497.5	CAVIN2	1988.89	-1.16451	0.109893	-10.5967	3.09e-26	1.96e-24	chr2:191834310-191847088	-	2919.35	2890.34	2450.67	1270.93	1416.78	985.296
ENSG00000146918.20	NCAPG2	813.042	-1.16444	0.0974205	-11.9527	6.28e-33	6.24e-31	chr7:158631169-158704804	-	1127.12	1015.69	1231.69	495.234	483.972	524.546
ENSG00000176170.14	SPHK1	143.346	-1.16196	0.174005	-6.67776	2.43e-11	5.25e-10	chr17:76376584-76387860	+	190.237	206.948	198.016	78.1949	93.3498	93.3314
ENSG00000168306.13	ACOX2	46.6835	-1.15949	0.297096	-3.90275	9.51e-05	0.000780162	chr3:58505136-58537283	-	75.8086	57.1487	59.9497	26.065	26.8682	34.2609
ENSG00000166106.4	ADAMTS15	1061.26	-1.15944	0.0939536	-12.3406	5.47e-35	5.82e-33	chr11:130448645-130476645	+	1384.58	1415.73	1598.66	597.409	649.315	721.841
ENSG00000130164.14	LDLR	2160.7	-1.15944	0.0884317	-13.1112	2.84e-39	3.74e-37	chr19:11089462-11133820	+	2863.56	3191.67	2908.47	1348.08	1478.1	1174.32
ENSG00000166851.15	PLK1	114.871	-1.15706	0.202665	-5.70925	1.13e-08	1.8e-07	chr16:23677656-23690367	+	164.49	150.665	163.499	53.1725	80.6046	76.7916
ENSG00000084710.14	EFR3B	1646.42	-1.15461	0.083209	-13.876	8.85e-44	1.5e-41	chr2:25042076-25159135	+	2248.51	2133.55	2439.77	1092.64	1018.92	945.128
ENSG00000179604.10	CDC42EP4	1024.22	-1.15447	0.0813017	-14.1998	9.18e-46	1.7e-43	chr17:73283624-73312005	-	1416.05	1405.34	1422.44	637.027	648.97	615.515
ENSG00000163689.20	CFAP20DC	22.0381	-1.14787	0.424938	-2.70127	0.00690751	0.0323688	chr3:58717365-59050084	-	22.8856	30.3062	38.1498	15.639	13.4341	11.8141
ENSG00000196550.11	FAM72A	21.3783	-1.14537	0.43697	-2.62115	0.00876326	0.039459	chr1:206186179-206204414	-	25.7463	26.8426	36.3332	8.34078	14.4675	16.5397
ENSG00000171243.8	SOSTDC1	83.5949	-1.14256	0.238104	-4.79857	1.6e-06	1.89e-05	chr7:16461481-16530580	-	94.4032	114.297	139.883	47.9595	61.3146	43.7122
ENSG00000076382.17	SPAG5	694.487	-1.14218	0.104191	-10.9624	5.79e-28	4e-26	chr17:28577565-28599025	-	975.5	855.499	1037.31	409.741	417.491	471.383
ENSG00000167601.12	AXL	873.087	-1.13915	0.109687	-10.3855	2.89e-25	1.74e-23	chr19:41219223-41261766	+	1255.85	1040.8	1302.54	543.194	485.35	610.789
ENSG00000147408.14	CSGALNACT1	164.63	-1.13724	0.181523	-6.265	3.73e-10	7e-09	chr8:19404161-19758029	-	277.488	193.093	210.732	112.601	106.439	87.4243
ENSG00000046604.14	DSG2	822.292	-1.13619	0.103345	-10.9941	4.08e-28	2.84e-26	chr18:31498177-31549008	+	1212.94	1023.48	1153.58	579.684	480.872	483.197
ENSG00000198053.12	SIRPA	1113.31	-1.13284	0.0848976	-13.3436	1.29e-40	1.84e-38	chr20:1894167-1940592	+	1483.27	1524.83	1587.76	699.583	738.187	646.231
ENSG00000154920.15	EME1	107.246	-1.13184	0.219499	-5.15645	2.52e-07	3.34e-06	chr17:50373220-50381483	+	137.314	129.884	172.583	60.4707	55.8032	87.4243
ENSG00000123975.5	CKS2	501.21	-1.13001	0.109564	-10.3137	6.11e-25	3.61e-23	chr9:89311195-89316703	+	669.404	639.893	753.913	319.035	296.584	328.432
ENSG00000136997.21	MYC	381.481	-1.12813	0.140033	-8.05614	7.87e-16	2.58e-14	chr8:127735434-127742951	+	497.762	514.339	566.797	191.838	286.594	231.556
ENSG00000068078.20	FGFR3	1066.28	-1.12753	0.0879461	-12.8207	1.26e-37	1.53e-35	chr4:1793293-1808872	+	1408.9	1488.46	1495.11	603.664	700.985	700.576
ENSG00000164211.13	STARD4	1426.58	-1.12674	0.102179	-11.0271	2.83e-28	1.99e-26	chr5:111496033-111512590	-	1945.28	1769.01	2154.56	1036.34	806.046	848.252
ENSG00000280721.1	LINC01943	48.6614	-1.12602	0.291926	-3.8572	0.000114691	0.000928857	chr2:87439523-87459044	-	68.6569	55.417	78.1163	29.1927	33.413	27.1724
ENSG00000108370.17	RGS9	65.9486	-1.12497	0.250104	-4.49802	6.86e-06	7.12e-05	chr17:65100812-65227703	+	92.9728	87.4549	89.0162	45.8743	35.4798	44.8936
ENSG00000102144.15	PGK1	27047.4	-1.12395	0.272875	-4.11894	3.81e-05	0.000340497	chrX:77910739-78129295	+	42688.8	33208.6	35344.9	22712	15399.6	12930.5
ENSG00000085063.17	CD59	11823.4	-1.12379	0.0656158	-17.1268	9.37e-66	3.31e-63	chr11:33703010-33736479	-	15515	15883	17238.3	7574.47	7667.08	7062.47
ENSG00000112541.18	PDE10A	332.102	-1.12126	0.14015	-8.00046	1.24e-15	3.97e-14	chr6:165327287-165988078	-	449.13	416.493	497.764	253.351	185.666	190.207
ENSG00000198363.18	ASPH	12841.4	-1.12107	0.0861479	-13.0134	1.03e-38	1.3e-36	chr8:61500556-61714640	-	18776.2	17136.8	16867.7	9293.72	7811.07	7162.89
ENSG00000115468.12	EFHD1	45.9692	-1.12068	0.310967	-3.60385	0.000313541	0.0022692	chr2:232606057-232682780	+	44.3409	76.1983	69.033	30.2353	32.3796	23.6282
ENSG00000114346.14	ECT2	1127.26	-1.11702	0.094455	-11.826	2.86e-32	2.73e-30	chr3:172750682-172821474	+	1540.49	1427.85	1656.79	690.2	655.515	792.726
ENSG00000261051.1	RP11-274H2.5	75.5328	-1.11679	0.252774	-4.41816	9.95e-06	0.000100467	chr3:146059585-146061679	-	107.276	112.566	90.8329	61.5133	50.2918	30.7167
ENSG00000164855.16	TMEM184A	77.3887	-1.116	0.241169	-4.62744	3.7e-06	4.08e-05	chr7:1542235-1560821	-	118.719	103.041	98.0995	36.4909	57.181	50.8006
ENSG00000140416.23	TPM1	2591.33	-1.11555	0.0702286	-15.8846	8.1e-57	2.26e-54	chr15:63042632-63071915	+	3358.47	3586.52	3698.72	1597.26	1686.15	1620.89
ENSG00000182718.18	ANXA2	31865.9	-1.11174	0.0714126	-15.5678	1.2e-54	3.05e-52	chr15:60347134-60402883	-	43805.9	39694.1	47211.3	20781.1	19209	20493.9
ENSG00000148175.13	STOM	1980.19	-1.11152	0.0914493	-12.1545	5.43e-34	5.61e-32	chr9:121338987-121370304	-	2753.43	2470.38	2893.94	1397.08	1122.26	1244.02
ENSG00000261616.1	RP11-6O2.3	123.547	-1.11137	0.194441	-5.71571	1.09e-08	1.73e-07	chr15:99139317-99145370	+	188.806	141.14	176.216	80.28	70.9596	83.8801
ENSG00000110195.14	FOLR1	48.0788	-1.10836	0.289034	-3.83471	0.000125711	0.00100614	chr11:72189558-72196323	+	57.2141	71.8689	67.2163	27.1075	29.6239	35.4423
ENSG00000101447.15	FAM83D	263.252	-1.10741	0.144494	-7.66406	1.8e-14	5.27e-13	chr20:38926312-38953106	+	397.638	320.379	361.515	144.921	166.032	189.026
ENSG00000100505.14	TRIM9	2826.61	-1.10685	0.0823812	-13.4358	3.73e-41	5.46e-39	chr14:50975262-51096061	-	4077.93	3760.56	3747.77	1962.17	1824.63	1586.63
ENSG00000168491.10	CCDC110	35.4216	-1.10551	0.384738	-2.87341	0.00406072	0.0206979	chr4:185445182-185471752	-	62.9355	29.4403	52.6831	33.3631	17.5677	16.5397
ENSG00000111341.10	MGP	5002.56	-1.10456	0.361831	-3.05268	0.00226808	0.0126323	chr12:14880864-14885857	-	8198.77	6619.73	5669.79	4285.08	3414.33	1827.64
ENSG00000118804.9	STBD1	27.537	-1.10338	0.373795	-2.95184	0.00315884	0.0167485	chr4:76306733-76311130	+	41.4802	33.7697	38.1498	16.6816	18.6011	16.5397
ENSG00000170421.12	KRT8	200.341	-1.10055	0.163972	-6.71181	1.92e-11	4.22e-10	chr12:52897187-52949954	-	247.451	238.986	336.082	120.941	127.452	131.136
ENSG00000121281.13	ADCY7	314.787	-1.09991	0.13123	-8.38159	5.22e-17	1.86e-15	chr16:50246137-50318135	+	454.852	403.505	435.998	196.008	221.146	177.211
ENSG00000142798.20	HSPG2	356.723	-1.09781	0.142885	-7.68315	1.55e-14	4.55e-13	chr1:21822244-21937310	-	434.827	491.826	537.731	177.242	260.07	238.645
ENSG00000185697.17	MYBL1	258.192	-1.09734	0.15015	-7.30828	2.71e-13	7.11e-12	chr8:66562175-66614247	-	387.625	284.012	386.948	166.816	161.898	161.853
ENSG00000010278.15	CD9	2950.27	-1.09717	0.0832044	-13.1864	1.05e-39	1.42e-37	chr12:6199715-6238271	+	4136.58	3630.68	4294.58	2037.24	1751.26	1851.27
ENSG00000012171.20	SEMA3B	129.717	-1.09567	0.197205	-5.55599	2.76e-08	4.18e-07	chr3:50267558-50277546	+	215.983	164.519	152.599	74.0245	94.3832	76.7916
ENSG00000171223.6	JUNB	269.257	-1.09415	0.159414	-6.86358	6.72e-12	1.56e-10	chr19:12791486-12793315	+	462.004	325.575	316.098	154.305	189.8	167.76
ENSG00000071539.14	TRIP13	203.912	-1.09411	0.153888	-7.10974	1.16e-12	2.9e-11	chr5:892884-919357	+	298.943	239.852	296.115	129.282	128.141	131.136
ENSG00000165891.16	E2F7	80.0423	-1.09338	0.229578	-4.76257	1.91e-06	2.23e-05	chr12:77021248-77065569	-	108.707	93.5161	125.349	52.1299	48.5694	51.982
ENSG00000128016.7	ZFP36	33.7835	-1.09334	0.355389	-3.07646	0.00209476	0.0118068	chr19:39406847-39409412	+	35.7588	53.6852	49.0498	14.5964	24.8014	24.8096
ENSG00000139865.16	TTC6	22.2187	-1.09312	0.425065	-2.57165	0.0101216	0.044408	chr14:37595847-38041442	+	32.8981	36.3674	21.7999	13.5538	16.8787	11.8141
ENSG00000177119.17	ANO6	2731.77	-1.0924	0.083466	-13.088	3.86e-39	4.98e-37	chr12:45215987-45482280	+	3897.71	3425.46	3829.51	1906.91	1587.29	1743.76
ENSG00000286502.1	RP13-129E14.1	32.5308	-1.0923	0.36469	-2.99513	0.00274324	0.014791	chr9:134770651-134775671	-	37.1891	46.7581	50.8664	20.852	26.5237	12.9955
ENSG00000163932.15	PRKCD	29.4393	-1.09223	0.362647	-3.01183	0.00259678	0.0141215	chr3:53156009-53192717	+	35.7588	39.8309	45.4164	18.7668	20.3234	16.5397
ENSG00000179862.7	CITED4	56.9878	-1.09018	0.273492	-3.98613	6.72e-05	0.000568849	chr1:40861054-40862363	-	91.5425	81.3937	59.9497	31.2779	39.9578	37.8051
ENSG00000214274.10	ANG	50.2516	-1.08996	0.315768	-3.45177	0.000556924	0.00374715	chr14:20684177-20698971	+	84.3907	59.7464	59.9497	47.9595	25.8348	23.6282
ENSG00000136770.11	DNAJC1	731.713	-1.0878	0.0920285	-11.8203	3.07e-32	2.91e-30	chr10:21756548-22003769	-	951.184	995.774	1042.76	463.956	482.939	453.661
ENSG00000250548.7	LINC01303	34.438	-1.0876	0.336576	-3.23135	0.00123205	0.0074826	chr14:61556273-61570653	-	40.0498	52.8193	47.2331	20.852	22.0457	23.6282
ENSG00000078114.19	NEBL	2155.24	-1.08617	0.0828249	-13.114	2.74e-39	3.63e-37	chr10:20779973-21293011	-	3046.65	2759.59	2979.32	1521.15	1267.28	1357.44
ENSG00000117394.24	SLC2A1	4588.57	-1.08478	0.271334	-3.99794	6.39e-05	0.000543309	chr1:42925353-42958893	-	7786.83	4906.13	6018.59	3564.64	3024.74	2230.5
ENSG00000177453.7	NIM1K	147.913	-1.08477	0.410225	-2.64432	0.00818549	0.0373134	chr5:43192071-43280850	+	241.729	143.738	217.999	139.708	84.0492	60.2519
ENSG00000136068.16	FLNB	17522	-1.08428	0.234737	-4.61911	3.85e-06	4.23e-05	chr3:58008398-58172251	+	27299.7	21059.3	23080.6	14226.2	10753.1	8712.9
ENSG00000188549.12	CCDC9B	113.704	-1.08209	0.198836	-5.44214	5.26e-08	7.67e-07	chr15:40331452-40340967	-	150.187	163.653	147.149	62.5559	68.8928	89.7871
ENSG00000138061.12	CYP1B1	42.7249	-1.08136	0.302385	-3.57612	0.000348734	0.00248785	chr2:38066973-38109902	-	57.2141	63.21	52.6831	30.2353	25.8348	27.1724
ENSG00000164304.16	CAGE1	47.5728	-1.07958	0.287627	-3.75339	0.000174457	0.00134403	chr6:7326656-7389742	-	64.3658	58.8805	70.8497	33.3631	29.6239	28.3538
ENSG00000149925.22	ALDOA	460.945	-1.07911	0.130222	-8.28668	1.16e-16	4.04e-15	chr16:30064164-30070457	+	685.138	601.794	597.68	241.883	346.186	292.99
ENSG00000163399.16	ATP1A1	10327.8	-1.07778	0.0775038	-13.9061	5.81e-44	9.99e-42	chr1:116372668-116410261	+	14007.4	13198.8	14858.4	6247.25	7382.9	6272.1
ENSG00000130270.16	ATP8B3	108.198	-1.07539	0.203788	-5.27702	1.31e-07	1.82e-06	chr19:1782075-1812276	-	167.351	135.079	139.883	76.1097	74.0598	56.7077
ENSG00000105088.9	OLFM2	83.4088	-1.07327	0.230506	-4.65614	3.22e-06	3.59e-05	chr19:9853718-9936515	-	108.707	94.382	138.066	49.0021	54.7698	55.5263
ENSG00000186480.13	INSIG1	7567.7	-1.07325	0.188047	-5.70735	1.15e-08	1.81e-07	chr7:155297776-155310235	+	10902.1	9354.21	10523.9	5906.32	4880.02	3839.58
ENSG00000168389.18	MFSD2A	590.228	-1.07192	0.110174	-9.72932	2.26e-22	1.15e-20	chr1:39955112-39969968	+	738.061	812.205	848.379	333.631	377.877	431.215
ENSG00000110693.19	SOX6	556.958	-1.07178	0.110491	-9.70021	3.01e-22	1.5e-20	chr11:15966449-16739591	-	762.377	687.517	812.046	388.889	325.863	365.056
ENSG00000139618.17	BRCA2	206.124	-1.07109	0.176901	-6.05476	1.41e-09	2.48e-08	chr13:32315086-32400268	+	277.488	229.461	328.815	153.262	107.128	140.588
ENSG00000135750.15	KCNK1	54.5887	-1.07107	0.26769	-4.00117	6.3e-05	0.000537112	chr1:233614106-233672514	+	70.0872	77.9301	74.483	34.4057	37.5466	33.0795
ENSG00000130707.18	ASS1	969.731	-1.06986	0.0959425	-11.151	7.08e-29	5.09e-27	chr9:130444961-130501274	+	1318.78	1192.33	1427.89	624.516	581.455	673.404
ENSG00000185989.11	RASA3	493.283	-1.06732	0.10779	-9.90185	4.09e-23	2.18e-21	chr13:113977783-114132623	-	673.696	626.038	708.497	295.055	330.341	326.069
ENSG00000153721.19	CNKSR3	1494.46	-1.06703	0.0857594	-12.4421	1.54e-35	1.71e-33	chr6:154387515-154510685	-	1838	2090.26	2147.29	983.17	1011.35	896.69
ENSG00000198826.11	ARHGAP11A	324.969	-1.06688	0.126844	-8.41095	4.07e-17	1.47e-15	chr15:32615144-32639941	+	467.725	392.248	461.431	204.349	206.678	217.379
ENSG00000174125.8	TLR1	47.8261	-1.0616	0.29148	-3.64212	0.000270406	0.00198717	chr4:38790677-38856817	-	78.6693	57.1487	58.1331	32.3205	29.9684	30.7167
ENSG00000134256.13	CD101	23.8166	-1.05897	0.419648	-2.52348	0.0116201	0.0497131	chr1:117001750-117036552	+	37.1891	27.7085	32.6998	19.8094	17.2232	8.26987
ENSG00000163535.18	SGO2	258.363	-1.05882	0.15667	-6.75826	1.4e-11	3.11e-10	chr2:200510008-200584096	+	384.765	296.134	368.782	200.179	163.276	137.044
ENSG00000196083.10	IL1RAP	4753.38	-1.05865	0.0729031	-14.5213	8.88e-48	1.75e-45	chr3:190514051-190659750	+	6366.49	6323.59	6581.75	3366.55	3057.12	2824.75
ENSG00000007237.19	GAS7	1539.41	-1.05783	0.0869581	-12.1648	4.79e-34	4.98e-32	chr17:9910606-10198606	-	1920.96	2209.75	2114.59	922.699	1081.96	986.477
ENSG00000004399.13	PLXND1	3294.33	-1.05759	0.0773926	-13.6652	1.64e-42	2.55e-40	chr3:129555214-129606676	-	4229.55	4448.08	4672.44	1960.08	2120.18	2335.65
ENSG00000104738.18	MCM4	1307.7	-1.05756	0.0937496	-11.2807	1.63e-29	1.25e-27	chr8:47960185-47978160	+	1629.17	1704.07	1965.62	793.417	817.069	936.858
ENSG00000137193.14	PIM1	85.5486	-1.05553	0.253077	-4.1708	3.04e-05	0.000275022	chr6:37170152-37175428	+	80.0997	117.761	150.783	41.7039	62.6925	60.2519
ENSG00000129514.8	FOXA1	52.5954	-1.05533	0.318469	-3.31375	0.000920549	0.00579146	chr14:37589552-37596059	-	100.125	48.4898	63.583	30.2353	28.2461	44.8936
ENSG00000182732.18	RGS6	557.206	-1.05488	0.104746	-10.0708	7.44e-24	4.16e-22	chr14:71932429-72566530	+	685.138	768.044	801.146	354.483	349.287	385.14
ENSG00000172159.16	FRMD3	1394.74	-1.05439	0.10242	-10.2948	7.44e-25	4.34e-23	chr9:83242990-83538546	-	1743.6	1712.73	2192.71	998.809	838.081	882.513
ENSG00000176912.5	TYMSOS	31.6288	-1.05223	0.359961	-2.92319	0.00346468	0.0181462	chr18:630886-658340	-	41.4802	37.2333	50.8664	22.9372	23.0791	14.1769
ENSG00000162783.11	IER5	540.062	-1.04969	0.11179	-9.38988	6.01e-21	2.72e-19	chr1:181088700-181092900	+	723.758	643.356	821.129	364.909	343.431	343.79
ENSG00000142192.21	APP	33324.1	-1.0484	0.0622632	-16.8383	1.28e-63	4.28e-61	chr21:25880550-26171128	-	46589.4	43340.4	44858.7	22257.4	22457.7	20440.8
ENSG00000152377.14	SPOCK1	1559.11	-1.0472	0.207554	-5.04543	4.53e-07	5.79e-06	chr5:136975298-137598379	-	1902.37	1865.99	2534.24	985.255	857.027	1209.76
ENSG00000152078.10	TLCD4	351.839	-1.04679	0.137104	-7.63504	2.26e-14	6.51e-13	chr1:95117355-95197607	+	476.307	434.677	512.298	277.331	216.668	193.751
ENSG00000182175.14	RGMA	533.551	-1.04549	0.118467	-8.82517	1.09e-18	4.5e-17	chr15:93035273-93089204	-	642.228	725.616	793.88	297.14	378.566	363.874
ENSG00000185904.12	LINC00839	871.625	-1.04454	0.0929957	-11.2321	2.84e-29	2.11e-27	chr10:42475480-42495337	+	1191.48	1101.41	1226.24	608.877	528.752	572.984
ENSG00000097046.13	CDC7	91.9195	-1.04453	0.219898	-4.75006	2.03e-06	2.36e-05	chr1:91500851-91525764	+	125.871	103.041	143.516	66.7263	56.8366	55.5263
ENSG00000169231.13	THBS3	566.681	-1.04354	0.101245	-10.3071	6.54e-25	3.85e-23	chr1:155195588-155209051	-	736.631	737.738	813.863	366.994	356.176	388.684
ENSG00000221869.5	CEBPD	326.555	-1.04336	0.176796	-5.90149	3.6e-09	6.08e-08	chr8:47736913-47738164	-	437.688	506.546	381.498	175.156	288.316	170.123
ENSG00000160447.7	PKN3	62.8858	-1.03989	0.251933	-4.12764	3.67e-05	0.000328762	chr9:128702503-128720916	+	78.6693	87.4549	87.1996	46.9169	39.2689	37.8051
ENSG00000103995.14	CEP152	228.201	-1.03917	0.165676	-6.2723	3.56e-10	6.69e-09	chr15:48712928-48811146	-	301.804	241.583	379.682	151.177	140.197	154.765
ENSG00000260035.1	CTD-2651B20.6	146.299	-1.03791	0.218435	-4.75156	2.02e-06	2.34e-05	chr15:45200325-45200632	-	283.21	150.665	158.049	92.7912	100.928	92.15
ENSG00000155380.13	SLC16A1	13079.3	-1.03789	0.282326	-3.67623	0.000236709	0.0017658	chr1:112911847-112957593	-	20050.7	15528	17194.7	11528	7877.55	6296.91
ENSG00000176273.15	SLC35G1	266.91	-1.03774	0.134855	-7.6952	1.41e-14	4.18e-13	chr10:93893973-93956062	+	331.842	359.344	386.948	187.668	174.988	160.672
ENSG00000125355.16	TMEM255A	362.174	-1.03642	0.124595	-8.31831	8.92e-17	3.13e-15	chrX:120258650-120311556	-	483.459	455.458	526.831	255.437	246.292	205.565
ENSG00000188039.16	NWD1	454.552	-1.03547	0.154455	-6.70405	2.03e-11	4.44e-10	chr19:16719847-16817963	+	683.708	574.951	572.247	399.315	263.171	233.919
ENSG00000103485.19	QPRT	73.241	-1.03321	0.233847	-4.41834	9.95e-06	0.000100434	chr16:29663279-29698699	+	92.9728	99.5774	103.55	42.7465	50.9807	49.6192
ENSG00000240032.1	LNCSRLR	49.6319	-1.03288	0.298354	-3.46191	0.000536349	0.00362104	chr3:146066344-146069185	-	74.3783	78.796	47.2331	32.3205	37.8911	27.1724
ENSG00000179869.15	ABCA13	2422.7	-1.03246	0.0878013	-11.7591	6.34e-32	5.85e-30	chr7:48171458-48647497	+	3163.94	3413.34	3177.33	1825.59	1459.15	1496.85
ENSG00000095015.6	MAP3K1	1853.41	-1.03194	0.0878489	-11.7467	7.34e-32	6.75e-30	chr5:56815549-56896152	+	2275.69	2375.14	2824.9	1240.69	1246.27	1157.78
ENSG00000134602.16	STK26	519.018	-1.02995	0.109186	-9.43304	3.98e-21	1.82e-19	chrX:132023302-132075943	+	659.392	680.59	750.28	378.463	327.585	317.799
ENSG00000256235.3	SMIM3	1328.66	-1.02945	0.293242	-3.51057	0.00044715	0.00309497	chr5:150778757-150796734	+	2129.79	1582.85	1638.63	1145.82	871.15	603.7
ENSG00000106341.11	PPP1R17	26.1526	-1.02728	0.383989	-2.67529	0.00746652	0.0345038	chr7:31687215-31708455	+	34.3284	37.2333	34.5165	16.6816	19.9789	14.1769
ENSG00000169247.14	SH3TC2	361.433	-1.02688	0.127485	-8.05495	7.95e-16	2.6e-14	chr5:148923639-149063163	-	510.635	442.47	501.398	273.161	223.557	217.379
ENSG00000124575.7	H1-3	776.105	-1.02603	0.101956	-10.0635	8.01e-24	4.46e-22	chr6:26234212-26234987	-	1087.07	943.82	1088.18	517.129	463.993	556.444
ENSG00000114023.15	FAM162A	1414.04	-1.02483	0.330263	-3.10308	0.00191515	0.0109285	chr3:122384176-122412334	+	2237.07	1596.7	1854.81	1304.29	835.67	655.682
ENSG00000109099.16	PMP22	2675.33	-1.02306	0.085851	-11.9167	9.69e-33	9.38e-31	chr17:15229773-15272292	-	3515.8	3258.34	3982.11	1774.5	1634.48	1886.71
ENSG00000115353.11	TACR1	42.7039	-1.02278	0.309642	-3.30309	0.000956253	0.00599509	chr2:75046463-75199520	-	47.2016	53.6852	70.8497	26.065	26.5237	31.8981
ENSG00000121858.11	TNFSF10	147.999	-1.02255	0.18975	-5.38894	7.09e-08	1.01e-06	chr3:172505508-172523475	-	218.844	206.082	167.133	124.069	86.805	85.0615
ENSG00000181544.15	FANCB	131.725	-1.02255	0.194037	-5.26985	1.37e-07	1.88e-06	chrX:14835961-14873069	-	188.806	142.872	201.649	75.0671	93.3498	88.6057
ENSG00000132640.15	BTBD3	3581.63	-1.02051	0.0821333	-12.425	1.91e-35	2.09e-33	chr20:11890723-11926609	+	4805.98	4336.38	5250.14	2473.04	2187	2437.25
ENSG00000162975.5	KCNF1	34.9471	-1.02013	0.337227	-3.02504	0.002486	0.0136423	chr2:10911934-10914225	+	41.4802	42.4286	56.3164	23.9798	20.6678	24.8096
ENSG00000110042.8	DTX4	49.9766	-1.01909	0.289302	-3.52259	0.000427357	0.00297359	chr11:59171430-59208588	+	71.5176	51.9534	78.1163	32.3205	31.6907	34.2609
ENSG00000274290.3	H2BC6	168.669	-1.01899	0.161296	-6.31755	2.66e-10	5.07e-09	chr6:26172059-26184655	+	220.274	212.143	247.065	104.26	113.673	114.597
ENSG00000151006.7	PRSS53	58.4282	-1.01833	0.269009	-3.7855	0.0001534	0.00120196	chr16:31083425-31089628	-	90.1121	65.8076	78.1163	43.7891	33.7575	38.9865
ENSG00000171914.16	TLN2	2202.97	-1.01819	0.0821582	-12.393	2.85e-35	3.05e-33	chr15:62390526-62844631	+	2796.34	2914.59	3135.55	1344.95	1418.5	1607.9
ENSG00000136425.14	CIB2	51.2786	-1.01743	0.290193	-3.50606	0.000454792	0.00314346	chr15:78104606-78131535	-	77.239	71.8689	58.1331	37.5335	39.2689	23.6282
ENSG00000246640.1	PICART1	36.2476	-1.0164	0.336612	-3.01951	0.00253184	0.0138334	chr17:50050349-50055739	-	37.1891	58.0146	50.8664	22.9372	27.2127	21.2654
ENSG00000125538.12	IL1B	118.524	-1.01529	0.194877	-5.2099	1.89e-07	2.56e-06	chr2:112829751-112836816	-	134.453	180.105	159.866	71.9393	78.5378	86.2429
ENSG00000100504.17	PYGL	1730.55	-1.01332	0.103286	-9.81081	1.01e-22	5.26e-21	chr14:50857891-50944483	-	2464.5	2175.12	2301.71	1376.23	1056.82	1008.92
ENSG00000243415.2	RP11-274H2.2	49.4107	-1.01324	0.33229	-3.04927	0.00229397	0.0127411	chr3:146064042-146105204	+	82.9604	71.8689	45.4164	34.4057	44.0914	17.7211
ENSG00000113368.12	LMNB1	679.195	-1.01215	0.0950369	-10.65	1.74e-26	1.13e-24	chr5:126776623-126837020	+	888.248	878.012	959.195	428.508	447.459	473.745
ENSG00000141753.7	IGFBP4	138.174	-1.01127	0.181602	-5.56861	2.57e-08	3.9e-07	chr17:40443450-40457725	+	158.769	180.971	214.366	98.0042	87.1494	89.7871
ENSG00000185745.10	IFIT1	337.641	-1.01083	0.365361	-2.76667	0.00566317	0.0274828	chr10:89392546-89406487	+	404.789	535.986	410.565	199.136	148.12	327.251
ENSG00000132646.11	PCNA	1226.08	-1.00925	0.10032	-10.0603	8.27e-24	4.59e-22	chr20:5114953-5126626	-	1447.52	1540.42	1931.11	809.056	808.457	819.898
ENSG00000185634.12	SHC4	381.001	-1.00366	0.127337	-7.88189	3.22e-15	9.94e-14	chr15:48823741-48963919	-	529.23	510.009	486.864	295.055	254.559	210.291
ENSG00000120913.23	PDLIM2	193.117	-1.00356	0.159036	-6.31025	2.79e-10	5.29e-09	chr8:22578279-22598025	+	294.652	252.84	223.449	121.984	124.007	141.769
ENSG00000158373.8	H2BC5	1598.59	-1.00015	0.0933525	-10.7137	8.78e-27	5.84e-25	chr6:26158146-26171349	+	2161.26	1861.66	2372.56	1066.58	1002.39	1127.06
ENSG00000197261.11	C6orf141	1157.49	1.00128	0.212314	4.71604	2.4e-06	2.75e-05	chr6:49550646-49561907	+	752.365	903.989	655.814	1570.15	1836.34	1226.3
ENSG00000265727.2	RN7SL648P	53.0267	1.00165	0.296432	3.37902	0.000727447	0.00472398	chrX:74242608-74242908	-	28.607	38.0992	38.1498	61.5133	62.0035	89.7871
ENSG00000116990.11	MYCL	60.6195	1.00228	0.284272	3.52577	0.000422257	0.00294018	chr1:39895426-39902256	-	38.6195	33.7697	49.0498	82.3652	63.0369	96.8756
ENSG00000038427.16	VCAN	8189.75	1.00488	0.0660592	15.2117	2.96e-52	6.71e-50	chr5:83471618-83582303	+	5232.23	5733.92	5371.86	10350.9	11357.3	11092.3
ENSG00000134769.23	DTNA	929.59	1.01022	0.0870312	11.6075	3.77e-31	3.28e-29	chr18:34493291-34891844	+	620.773	604.391	624.93	1290.74	1191.5	1245.21
ENSG00000136114.17	THSD1	100.558	1.01055	0.237843	4.24883	2.15e-05	0.000201831	chr13:52377167-52416373	-	75.8086	72.7348	49.0498	102.175	132.274	171.304
ENSG00000214562.15	NUTM2D	43.7812	1.01339	0.314077	3.22656	0.00125286	0.00759511	chr10:87357720-87370695	+	21.4553	32.9038	32.6998	59.4281	63.0369	53.1634
ENSG00000178623.12	GPR35	29.1233	1.01501	0.384596	2.63915	0.00831146	0.0378004	chr2:240605430-240631259	+	15.7339	25.9767	14.5333	37.5335	39.6134	41.3493
ENSG00000140262.18	TCF12	4579.17	1.01637	0.0677987	14.9909	8.42e-51	1.79e-48	chr15:56918623-57299281	+	3025.19	3057.46	3001.12	6539.17	5808.01	6044.09
ENSG00000176532.4	PRR15	65.7757	1.01841	0.25629	3.97366	7.08e-05	0.00059693	chr7:29563835-29567293	+	41.4802	48.4898	39.9665	88.6208	95.761	80.3359
ENSG00000156689.7	GLYATL2	61.9866	1.01988	0.287011	3.55347	0.000380187	0.00268605	chr11:58834065-58904215	-	25.7463	43.2945	54.4997	100.089	80.9491	67.3404
ENSG00000174292.12	TNK1	87.9943	1.01998	0.225371	4.52577	6.02e-06	6.33e-05	chr17:7380534-7389774	+	55.7837	63.21	54.4997	103.217	123.663	127.592
ENSG00000286721.1	CTD-2093G19.1	29.3559	1.02116	0.391245	2.61004	0.00905328	0.0405306	chr5:81408517-81411867	-	21.4553	22.5131	12.7166	51.0873	34.1019	34.2609
ENSG00000158321.18	AUTS2	670.178	1.02291	0.0950408	10.7629	5.15e-27	3.48e-25	chr7:69598296-70793506	+	457.712	443.336	423.281	888.294	892.851	915.593
ENSG00000139908.15	TSSK4	37.6905	1.0242	0.345349	2.96571	0.0030199	0.0160802	chr14:24205696-24208362	+	31.4677	17.3178	27.2499	56.3003	48.9139	44.8936
ENSG00000144724.20	PTPRG	2994.05	1.02944	0.0709553	14.5083	1.07e-47	2.1e-45	chr3:61561569-62297609	+	1925.25	2022.72	1951.09	3996.28	3811.15	4257.8
ENSG00000241489.8	AF011889.5	92.1989	1.02984	0.230043	4.47672	7.58e-06	7.82e-05	chrX:149477104-149540926	-	68.6569	69.2712	41.7831	110.515	135.374	127.592
ENSG00000173227.14	SYT12	1544.64	1.0308	0.207631	4.96457	6.89e-07	8.61e-06	chr11:67006778-67050863	+	1055.6	1191.46	795.696	1759.91	2392.99	2072.19
ENSG00000184226.15	PCDH9	868.039	1.03101	0.0981196	10.5077	7.96e-26	4.93e-24	chr13:66302834-67230445	-	534.951	642.49	523.197	1206.29	1130.53	1170.78
ENSG00000203872.7	C6orf163	35.2994	1.03146	0.341769	3.018	0.00254453	0.0138787	chr6:87344813-87365463	+	21.4553	24.2449	23.6166	44.8317	46.8471	50.8006
ENSG00000189423.13	USP32P3	787.666	1.0326	0.103318	9.99438	1.61e-23	8.83e-22	chr17:20408311-20434286	+	433.396	542.047	575.881	1067.62	1029.6	1077.45
ENSG00000137877.10	SPTBN5	134.927	1.03325	0.193891	5.32904	9.87e-08	1.39e-06	chr15:41848146-41894053	-	88.6818	94.382	83.5663	161.603	213.568	167.76
ENSG00000161328.11	LRRC56	90.3194	1.03383	0.22235	4.64956	3.33e-06	3.7e-05	chr11:537527-554912	+	67.2265	60.6123	49.0498	111.558	124.696	128.774
ENSG00000285367.1	RP11-437L7.2	54.1206	1.03406	0.291992	3.5414	0.000398003	0.00279593	chr16:51150770-51442519	+	37.1891	30.3062	39.9665	58.3855	70.2707	88.6057
ENSG00000273173.5	SNURF	55.3271	1.03602	0.275937	3.75455	0.000173651	0.00133834	chr15:24954986-24977850	+	32.8981	38.9651	36.3332	70.8967	73.7153	79.1545
ENSG00000112852.7	PCDHB2	533.053	1.03802	0.104592	9.92447	3.26e-23	1.75e-21	chr5:141094606-141098703	+	321.829	355.015	370.598	724.606	704.429	721.841
ENSG00000112137.18	PHACTR1	26.0565	1.03987	0.411236	2.52864	0.0114505	0.0491046	chr6:12716554-13287843	+	18.5946	15.586	18.1666	28.1501	45.1248	30.7167
ENSG00000182568.17	SATB1	104.566	1.04059	0.209886	4.95789	7.13e-07	8.87e-06	chr3:18345377-18445588	-	77.239	60.6123	69.033	125.112	145.364	150.039
ENSG00000272899.4	ATP6V1FNB	35.4674	1.04331	0.352775	2.95742	0.00310221	0.0164704	chr7:128866330-128872047	+	30.0374	19.9155	19.9832	38.5761	49.9473	54.3449
ENSG00000112782.19	CLIC5	30.7475	1.04361	0.381139	2.73814	0.00617874	0.0294496	chr6:45880827-46080348	-	18.5946	17.3178	25.4332	51.0873	41.3357	30.7167
ENSG00000109927.11	TECTA	33.7884	1.04919	0.375486	2.79423	0.00520238	0.0255478	chr11:121101243-121191490	+	30.0374	14.7201	21.7999	43.7891	36.8577	55.5263
ENSG00000224430.2	MKRN5P	43.7982	1.05088	0.319313	3.29107	0.000998059	0.0062374	chrX:74161062-74162528	-	31.4677	33.7697	18.1666	66.7263	54.7698	57.8891
ENSG00000260661.1	RP11-152L20.3	36.6998	1.05124	0.346051	3.03781	0.00238301	0.0131615	chr15:92148752-92331037	-	18.5946	30.3062	21.7999	42.7465	54.7698	51.982
ENSG00000111728.11	ST8SIA1	219.817	1.05482	0.160553	6.56992	5.03e-11	1.05e-09	chr12:22063773-22437041	-	148.757	143.738	138.066	310.694	333.097	244.552
ENSG00000254995.4	STX16-NPEPL1	55.0456	1.05695	0.287292	3.679	0.000234154	0.00174807	chr20:58651434-58715410	+	47.2016	35.5015	23.6166	69.8541	76.1266	77.9731
ENSG00000176945.17	MUC20	33.1805	1.05762	0.369558	2.86185	0.00421173	0.0213515	chr3:195720884-195741123	+	30.0374	16.4519	18.1666	46.9169	37.8911	49.6192
ENSG00000197479.7	PCDHB11	100.41	1.06645	0.210167	5.07431	3.89e-07	5.02e-06	chr5:141199610-141203779	+	67.2265	69.2712	56.3164	131.367	132.963	145.313
ENSG00000012232.9	EXTL3	3838.92	1.06682	0.0833012	12.8068	1.5e-37	1.82e-35	chr8:28600469-28755599	+	2418.72	2793.36	2216.32	4939.83	5295.79	5369.51
ENSG00000160145.16	KALRN	548.796	1.06861	0.111985	9.54242	1.4e-21	6.57e-20	chr3:124033369-124726325	+	361.879	383.589	312.465	679.774	772.978	782.093
ENSG00000253767.3	PCDHGA8	58.6215	1.07107	0.29772	3.59756	0.00032122	0.00231496	chr5:141390157-141512975	+	22.8856	38.0992	52.6831	72.9819	68.2039	96.8756
ENSG00000157890.18	MEGF11	111.618	1.07289	0.209266	5.12694	2.94e-07	3.87e-06	chr15:65895079-66253750	-	72.9479	74.4665	67.2163	126.154	150.531	178.393
ENSG00000288079.1	RP11-325J6.2	28.1888	1.07413	0.383894	2.798	0.00514207	0.0253082	chr3:113259786-113266824	-	15.7339	17.3178	21.7999	39.6187	36.8577	37.8051
ENSG00000162946.23	DISC1	56.6472	1.07613	0.281129	3.82788	0.00012925	0.00103155	chr1:231626790-232041272	+	31.4677	39.8309	38.1498	85.493	82.3269	62.6147
ENSG00000154265.16	ABCA5	502.847	1.07967	0.115101	9.38016	6.59e-21	2.97e-19	chr17:69244311-69327244	-	314.677	335.965	312.465	700.626	611.424	741.925
ENSG00000165895.19	ARHGAP42	64.4819	1.08385	0.256129	4.23165	2.32e-05	0.000216643	chr11:100687288-100993941	+	41.4802	40.6968	41.7831	86.5356	85.4271	90.9686
ENSG00000179698.14	WDR97	90.3901	1.0891	0.230949	4.71577	2.41e-06	2.76e-05	chr8:144107726-144118328	+	58.6444	65.8076	47.2331	102.175	132.619	135.862
ENSG00000182704.8	TSKU	548.166	1.09009	0.103583	10.5238	6.71e-26	4.17e-24	chr11:76782251-76798153	+	344.715	358.478	348.798	737.117	781.589	718.297
ENSG00000074590.14	NUAK1	609.013	1.09095	0.112779	9.67341	3.91e-22	1.93e-20	chr12:106063345-106138954	-	330.411	413.03	421.465	788.204	793.645	907.323
ENSG00000057704.13	TMCC3	66.9734	1.09536	0.257441	4.25481	2.09e-05	0.000196976	chr12:94567122-94650557	-	51.4927	40.6968	36.3332	92.7912	97.8278	82.6987
ENSG00000270823.1	RP11-2E11.6	72.3073	1.09599	0.255705	4.28617	1.82e-05	0.000173534	chr7:130495794-130498427	-	34.3284	54.5511	47.2331	109.473	87.8384	100.42
ENSG00000224152.1	AC009506.1	43.3646	1.10006	0.316398	3.47684	0.000507364	0.00345053	chr2:159615296-159617082	+	31.4677	30.3062	19.9832	64.6411	60.6257	53.1634
ENSG00000196689.13	TRPV1	75.1817	1.10088	0.241791	4.55303	5.29e-06	5.63e-05	chr17:3565444-3609411	-	44.3409	49.3557	49.0498	95.919	97.8278	114.597
ENSG00000146001.5	PCDHB18P	38.8212	1.10372	0.332591	3.31853	0.000904916	0.00570764	chr5:141234333-141237529	+	31.4677	22.5131	19.9832	50.0447	53.3919	55.5263
ENSG00000135116.9	HRK	169.291	1.10573	0.181978	6.07616	1.23e-09	2.19e-08	chr12:116856144-116881441	-	75.8086	126.42	118.083	221.031	234.58	239.826
ENSG00000189223.15	PAX8-AS1	41.6197	1.10623	0.333359	3.31842	0.000905277	0.0057081	chr2:113211421-113276581	+	34.3284	22.5131	23.6166	45.8743	67.8594	55.5263
ENSG00000122877.17	EGR2	212.351	1.10819	0.187558	5.90855	3.45e-09	5.84e-08	chr10:62811996-62919900	-	187.376	98.7115	119.899	285.672	269.371	313.074
ENSG00000286214.1	COPG2IT1	43.6946	1.10987	0.335658	3.30654	0.000944546	0.00593487	chr7:130538954-130546900	+	24.316	38.9651	16.3499	66.7263	52.0141	63.7961
ENSG00000251867.4	RP11-48B3.5	23.55	1.11066	0.428194	2.59384	0.00949117	0.0421661	chr8:80484561-80486699	-	11.4428	16.4519	16.3499	39.6187	27.9016	29.5352
ENSG00000260855.1	RP11-439E19.10	71.1922	1.12173	0.246427	4.55197	5.31e-06	5.65e-05	chr1:246772301-246775772	+	50.0623	41.5627	43.5998	99.0468	99.5501	93.3314
ENSG00000107984.10	DKK1	8653.06	1.12458	0.181483	6.19662	5.77e-10	1.06e-08	chr10:52314281-52318042	+	5847.28	6192.85	4280.05	13189.9	11865.4	10542.9
ENSG00000268403.2	CTD-2371O3.3	37.5941	1.12511	0.335002	3.35851	0.000783625	0.00504076	chr11:9459556-9460702	-	21.4553	22.5131	27.2499	51.0873	48.9139	54.3449
ENSG00000196912.12	ANKRD36B	507.056	1.12554	0.109314	10.2964	7.32e-25	4.28e-23	chr2:97492663-97589965	-	294.652	315.184	346.982	713.137	659.993	712.39
ENSG00000261770.1	CTC-459F4.1	52.2655	1.12791	0.296278	3.80695	0.000140693	0.00111433	chr19:27757184-27760849	-	22.8856	41.5627	32.6998	66.7263	76.471	73.2474
ENSG00000113211.6	PCDHB6	27.3705	1.13113	0.404261	2.79802	0.00514172	0.0253082	chr5:141150057-141153287	+	15.7339	12.1225	25.4332	39.6187	38.2355	33.0795
ENSG00000092421.17	SEMA6A	70.8352	1.13274	0.26572	4.2629	2.02e-05	0.000190524	chr5:116443555-116574823	-	32.8981	51.0875	49.0498	76.1097	109.54	106.327
ENSG00000278594.1	RP11-146E13.5	22.5093	1.13553	0.446896	2.54092	0.011056	0.0476922	chr14:19131842-19132890	-	7.15176	13.8542	21.7999	30.2353	28.935	33.0795
ENSG00000198586.14	TLK1	1041.17	1.13756	0.0944364	12.0457	2.04e-33	2.08e-31	chr2:170990823-171231314	-	683.708	612.184	655.814	1500.3	1293.46	1501.57
ENSG00000286997.1	RP11-136H19.1	32.4743	1.13784	0.364913	3.11812	0.00182009	0.0104615	chr17:61119095-61135969	-	25.7463	17.3178	18.1666	50.0447	43.4025	40.1679
ENSG00000227954.7	TARID	100.192	1.14276	0.220657	5.17891	2.23e-07	2.99e-06	chr6:133502252-133892802	-	57.2141	64.9418	63.583	160.56	117.807	137.044
ENSG00000173442.13	EHBP1L1	137.331	1.14299	0.196477	5.81742	5.98e-09	9.81e-08	chr11:65576046-65592650	+	90.1121	97.8456	67.2163	172.029	218.39	178.393
ENSG00000228486.10	C2orf92	171.926	1.1432	0.184232	6.20524	5.46e-10	1e-08	chr2:97664217-97703064	+	97.2639	132.481	87.1996	264.82	244.225	205.565
ENSG00000261578.1	RP11-21L23.2	48.7146	1.14352	0.307334	3.72077	0.000198616	0.00150898	chr11:76800364-76804555	+	41.4802	27.7085	21.7999	74.0245	68.2039	59.0705
ENSG00000205085.13	FAM71F2	56.4346	1.14554	0.299806	3.82093	0.000132951	0.00105937	chr7:128671693-128687877	+	42.9105	38.0992	21.7999	72.9819	64.7593	98.057
ENSG00000197813.6	CTC-301O7.4	25.5551	1.14936	0.406327	2.82867	0.00467424	0.0233724	chr19:49331525-49340303	-	18.5946	17.3178	10.8999	35.4483	34.4464	36.6237
ENSG00000125434.11	SLC25A35	27.9684	1.14941	0.393839	2.91848	0.00351738	0.0183852	chr17:8287763-8295400	-	12.8732	21.6473	16.3499	39.6187	34.7909	42.5308
ENSG00000264943.1	SH3GL1P2	21.8861	1.15337	0.452034	2.55152	0.0107254	0.0464996	chr17:30624413-30625494	+	17.1642	15.586	7.26663	22.9372	34.1019	34.2609
ENSG00000143507.18	DUSP10	612.661	1.15624	0.123629	9.35251	8.56e-21	3.84e-19	chr1:221701424-221742089	-	439.118	375.796	317.915	949.807	745.076	848.252
ENSG00000030419.17	IKZF2	30.2845	1.15823	0.379438	3.05249	0.00226949	0.0126366	chr2:212999691-213152427	-	24.316	14.7201	18.1666	43.7891	44.0914	36.6237
ENSG00000163884.4	KLF15	124.3	1.15834	0.192587	6.01466	1.8e-09	3.15e-08	chr3:126342635-126357408	-	70.0872	84.8572	74.483	180.369	175.332	160.672
ENSG00000072422.17	RHOBTB1	437.977	1.15861	0.117754	9.83921	7.63e-23	3.99e-21	chr10:60869438-61001440	-	264.615	286.61	257.965	664.135	586.278	568.258
ENSG00000173269.14	MMRN2	23.6937	1.15969	0.443833	2.6129	0.00897768	0.0402468	chr10:86935540-86969481	-	7.15176	20.7814	14.5333	37.5335	27.9016	34.2609
ENSG00000235204.1	RP11-121A14.2	24.5196	1.15989	0.419286	2.76635	0.0056688	0.0274966	chr9:124259250-124261156	-	18.5946	11.2566	16.3499	36.4909	31.3462	33.0795
ENSG00000176387.7	HSD11B2	21.4842	1.1664	0.446925	2.60982	0.00905894	0.0405375	chr16:67430652-67437553	+	17.1642	10.3907	12.7166	33.3631	29.2795	25.991
ENSG00000153823.19	PID1	162.079	1.16912	0.17282	6.76496	1.33e-11	2.98e-10	chr2:228850526-229271287	-	94.4032	111.7	90.8329	236.67	229.758	209.11
ENSG00000070729.14	CNGB1	26.1183	1.16946	0.407813	2.86763	0.00413561	0.0210112	chr16:57882340-57971128	-	18.5946	18.1837	10.8999	30.2353	40.9912	37.8051
ENSG00000283538.3	RP11-180P8.1	26.2026	1.17024	0.415849	2.8141	0.0048914	0.0242193	chr17:62910021-62968549	-	21.4553	14.7201	12.7166	39.6187	42.7136	25.991
ENSG00000129682.16	FGF13	48.2767	1.17112	0.312596	3.74643	0.000179366	0.00137702	chrX:138614727-139222777	-	21.4553	26.8426	41.7831	74.0245	58.2144	67.3404
ENSG00000213197.3	NUDCP1	22.0928	1.17225	0.441849	2.65305	0.00797683	0.0365731	chr2:152389937-152390630	+	8.58211	15.586	16.3499	34.4057	29.2795	28.3538
ENSG00000177426.22	TGIF1	1682.53	1.17529	0.109794	10.7046	9.69e-27	6.42e-25	chr18:3411608-3459978	+	932.589	1115.27	1048.21	1893.36	2479.45	2626.27
ENSG00000154511.12	DIPK1A	1183.34	1.17657	0.0867614	13.561	6.82e-42	1.01e-39	chr1:92832737-92961522	-	729.479	715.225	730.296	1636.88	1526.67	1761.48
ENSG00000229474.8	PATL2	48.3558	1.17956	0.296827	3.9739	7.07e-05	0.000596593	chr15:44665732-44711323	-	31.4677	28.5744	29.0665	70.8967	67.515	62.6147
ENSG00000225783.8	MIAT	183.303	1.17957	0.171602	6.87387	6.25e-12	1.45e-10	chr22:26646411-26676475	+	120.15	116.029	99.9162	286.714	263.171	213.835
ENSG00000146966.13	DENND2A	5263.19	1.18342	0.0759275	15.5862	9.03e-55	2.35e-52	chr7:140518420-140673993	-	3214	3527.64	2899.39	7173.07	7584.41	7180.61
ENSG00000187550.9	SBK2	26.9403	1.18667	0.409885	2.89512	0.00379011	0.0195348	chr19:55528611-55537133	-	21.4553	18.1837	9.08329	41.7039	41.6802	29.5352
ENSG00000179431.7	FJX1	423.466	1.18776	0.116522	10.1935	2.12e-24	1.22e-22	chr11:35618460-35620865	+	251.742	281.414	237.982	574.472	610.39	584.798
ENSG00000092529.25	CAPN3	58.8259	1.18825	0.275178	4.31811	1.57e-05	0.000152443	chr15:42359498-42412949	+	38.6195	37.2333	30.8832	71.9393	80.9491	93.3314
ENSG00000180539.8	C9orf139	23.0094	1.19128	0.451919	2.63605	0.00838761	0.0380766	chr9:137027464-137037957	+	18.5946	12.1225	10.8999	25.0224	26.5237	44.8936
ENSG00000278921.2	EPB41L4A-DT	31.5235	1.19514	0.40265	2.96819	0.0029956	0.0159644	chr5:112419583-112420978	+	22.8856	25.9767	7.26663	37.5335	56.4921	38.9865
ENSG00000003400.15	CASP10	21.2418	1.1952	0.466703	2.56094	0.010439	0.0455577	chr2:201182898-201229406	+	11.4428	19.9155	5.44997	32.3205	29.9684	28.3538
ENSG00000163638.13	ADAMTS9	179.096	1.19605	0.174542	6.85255	7.25e-12	1.68e-10	chr3:64515654-64688000	-	123.01	106.504	98.0995	266.905	272.127	207.928
ENSG00000179241.13	LDLRAD3	623.778	1.19689	0.103245	11.5927	4.49e-31	3.89e-29	chr11:35943981-36232136	+	376.182	365.406	399.665	799.673	903.874	897.871
ENSG00000138814.17	PPP3CA	838.072	1.19724	0.0950225	12.5996	2.12e-36	2.45e-34	chr4:101023409-101348278	-	532.091	532.522	454.164	1187.52	1117.1	1205.04
ENSG00000123146.20	ADGRE5	709.581	1.19767	0.124619	9.61064	7.21e-22	3.52e-20	chr19:14380501-14408725	+	417.663	455.458	417.831	784.034	1055.44	1127.06
ENSG00000174599.5	TRAM1L1	23.9064	1.20046	0.445937	2.69199	0.00710267	0.0331184	chr4:117083554-117085576	-	20.0249	9.52479	14.5333	43.7891	27.2127	28.3538
ENSG00000164684.13	ZNF704	36.3603	1.20168	0.354534	3.38946	0.000700293	0.0045744	chr8:80628451-80874781	-	24.316	22.5131	18.1666	62.5559	40.9912	49.6192
ENSG00000159216.19	RUNX1	609.515	1.20471	0.102113	11.7978	4.01e-32	3.75e-30	chr21:34787801-36004667	-	386.195	375.796	343.348	868.484	878.728	804.54
ENSG00000257225.1	RP11-328C8.4	29.4865	1.2081	0.412613	2.92791	0.00341246	0.0179154	chr12:42459366-42466128	+	15.7339	19.0496	18.1666	61.5133	34.1019	28.3538
ENSG00000272931.1	LRRC8D-DT	34.8621	1.21399	0.373525	3.25009	0.00115368	0.00708888	chr1:89820174-89820868	-	12.8732	28.5744	19.9832	38.5761	48.9139	60.2519
ENSG00000115414.21	FN1	2454.73	1.21718	0.20986	5.79996	6.63e-09	1.08e-07	chr2:215360440-215436073	-	1775.07	1400.14	1253.49	4121.39	3159.77	3018.5
ENSG00000145777.15	TSLP	35.1453	1.22149	0.364683	3.34945	0.000809722	0.005185	chr5:111070062-111078026	+	17.1642	27.7085	16.3499	42.7465	45.4693	61.4333
ENSG00000113448.19	PDE4D	21.6626	1.22211	0.461501	2.64812	0.00809404	0.0369647	chr5:58969038-60522120	-	20.0249	11.2566	7.26663	26.065	27.5571	37.8051
ENSG00000248449.2	PCDHGB8P	29.5308	1.23225	0.395099	3.11883	0.00181568	0.0104423	chr5:141426286-141429158	+	17.1642	12.9884	23.6166	42.7465	33.413	47.2564
ENSG00000140044.13	JDP2	167.697	1.23792	0.181948	6.80371	1.02e-11	2.31e-10	chr14:75427716-75474111	+	85.8211	117.761	92.6496	203.307	243.192	263.454
ENSG00000224593.1	RP11-30B1.1	29.6851	1.24119	0.378405	3.28006	0.00103783	0.00646144	chr7:3337889-3338601	+	18.5946	19.0496	14.5333	43.7891	39.6134	42.5308
ENSG00000177706.9	FAM20C	236.169	1.24229	0.157346	7.89527	2.9e-15	8.97e-14	chr7:192571-260772	+	125.871	153.263	141.699	356.569	359.621	279.994
ENSG00000149506.11	ZP1	71.5843	1.24666	0.254529	4.8979	9.69e-07	1.18e-05	chr11:60867562-60875693	+	51.4927	44.1604	30.8832	101.132	108.506	93.3314
ENSG00000249835.2	VCAN-AS1	28.0457	1.25294	0.401023	3.12436	0.00178193	0.0102751	chr5:83531352-83581320	-	12.8732	20.7814	14.5333	44.8317	32.7241	42.5308
ENSG00000234567.1	RP1-283K11.2	140.391	1.25386	0.204442	6.13307	8.62e-10	1.55e-08	chr6:133452857-133456605	-	92.9728	59.7464	99.9162	208.52	173.265	207.928
ENSG00000185760.17	KCNQ5	26.8033	1.26425	0.41442	3.05065	0.00228348	0.0127038	chr6:72621792-73198853	+	14.3035	13.8542	19.9832	47.9595	37.5466	27.1724
ENSG00000111886.11	GABRR2	33.7651	1.26467	0.383978	3.29361	0.00098909	0.00618526	chr6:89254464-89315299	-	17.1642	24.2449	16.3499	37.5335	39.9578	67.3404
ENSG00000240038.7	AMY2B	42.2798	1.26671	0.332817	3.80603	0.000141218	0.00111803	chr1:103553815-103579534	+	18.5946	31.172	23.6166	69.8541	62.0035	48.4378
ENSG00000280780.2	JAKMIP2-AS1	20.5688	1.27197	0.456124	2.78865	0.00529279	0.0259273	chr5:147559994-147662009	+	12.8732	9.52479	14.5333	29.1927	28.935	28.3538
ENSG00000238039.1	AF011889.2	23.9577	1.27395	0.425434	2.99448	0.00274917	0.0148149	chrX:149511509-149526264	-	12.8732	12.1225	18.1666	32.3205	37.5466	30.7167
ENSG00000113209.9	PCDHB5	43.9938	1.27602	0.316506	4.03159	5.54e-05	0.000475993	chr5:141135206-141138615	+	28.607	22.5131	27.2499	56.3003	67.8594	61.4333
ENSG00000177614.11	PGBD5	264.888	1.27825	0.145252	8.80023	1.37e-18	5.56e-17	chr1:230314490-230426332	-	167.351	167.983	125.349	369.08	399.234	360.33
ENSG00000286153.1	AP000331.1	48.6059	1.27841	0.307717	4.15451	3.26e-05	0.000293881	chr21:34836286-34884882	+	30.0374	32.0379	21.7999	81.3226	68.5484	57.8891
ENSG00000124766.7	SOX4	6033.19	1.27905	0.0715021	17.8883	1.46e-71	5.75e-69	chr6:21593751-21598619	+	3402.81	3769.22	3378.98	8184.39	8343.27	9120.48
ENSG00000120328.6	PCDHB12	129.37	1.28341	0.193419	6.63538	3.24e-11	6.91e-10	chr5:141208697-141212571	+	70.0872	77.9301	76.2996	184.54	165.343	202.021
ENSG00000227953.7	LINC01341	20.2023	1.28472	0.467919	2.7456	0.00604007	0.0289282	chr1:246775880-246792385	+	15.7339	12.1225	7.26663	23.9798	33.7575	28.3538
ENSG00000269054.2	ZNF497-AS1	24.7643	1.28491	0.416793	3.08286	0.00205021	0.0115854	chr19:58362583-58367593	+	12.8732	12.9884	18.1666	36.4909	36.1687	31.8981
ENSG00000262096.2	PCDHB19P	41.1878	1.28542	0.3497	3.67579	0.000237113	0.00176815	chr5:141239923-141243034	+	34.3284	20.7814	16.3499	75.0671	50.9807	49.6192
ENSG00000163590.14	PPM1L	53.0993	1.2864	0.29123	4.41715	1e-05	0.000100885	chr3:160755602-161078902	+	28.607	35.5015	27.2499	85.493	74.4043	67.3404
ENSG00000160716.6	CHRNB2	21.0426	1.28647	0.458872	2.80355	0.00505428	0.0249134	chr1:154567778-154580013	+	17.1642	12.1225	7.26663	26.065	34.1019	29.5352
ENSG00000242732.4	RTL5	211.426	1.28827	0.163255	7.89117	2.99e-15	9.24e-14	chrX:72127110-72131901	-	150.187	116.895	99.9162	282.544	291.761	327.251
ENSG00000280007.1	AC008079.10	19.7586	1.28941	0.463266	2.78329	0.005381	0.0262813	chr22:18110759-18131154	-	12.8732	12.1225	9.08329	30.2353	28.2461	25.991
ENSG00000253159.3	PCDHGA12	25.3745	1.29074	0.427242	3.02109	0.00251868	0.0137795	chr5:141430507-141512975	+	12.8732	17.3178	12.7166	31.2779	29.6239	48.4378
ENSG00000179023.9	KLHDC7A	59.5007	1.29107	0.291867	4.42349	9.71e-06	9.85e-05	chr1:18480930-18485974	+	40.0498	40.6968	19.9832	102.175	76.1266	77.9731
ENSG00000063127.16	SLC6A16	75.3859	1.29157	0.256565	5.0341	4.8e-07	6.12e-06	chr19:49289638-49325215	-	31.4677	57.1487	39.9665	111.558	110.573	101.601
ENSG00000223813.3	AC007255.8	32.8105	1.29243	0.373522	3.46013	0.000539921	0.00364267	chr7:29514224-29563670	-	24.316	19.0496	12.7166	41.7039	42.3691	56.7077
ENSG00000253537.3	PCDHGA7	54.0771	1.29466	0.288258	4.49134	7.08e-06	7.33e-05	chr5:141382739-141512975	+	25.7463	29.4403	39.9665	80.28	75.7821	73.2474
ENSG00000128294.16	TPST2	1193.7	1.30499	0.0951849	13.7101	8.84e-43	1.4e-40	chr22:26521996-26596717	-	749.504	715.225	594.047	1736.97	1788.11	1578.36
ENSG00000264932.3	CTD-2104P17.2	19.4489	1.30551	0.498138	2.62078	0.008773	0.0394815	chr17:19649373-19649935	-	17.1642	5.19534	12.7166	30.2353	28.935	22.4468
ENSG00000162595.7	DIRAS3	128.29	1.30851	0.212162	6.16752	6.94e-10	1.26e-08	chr1:68045886-68051631	-	95.8335	77.9301	45.4164	166.816	199.445	184.3
ENSG00000274895.1	RP11-478J18.2	27.2456	1.31059	0.400828	3.26971	0.00107657	0.00668153	chr1:213983793-213986419	-	17.1642	16.4519	12.7166	45.8743	35.8243	35.4423
ENSG00000254726.3	MEX3A	205.263	1.31563	0.170973	7.69493	1.42e-14	4.18e-13	chr1:156072013-156082465	-	140.174	109.968	103.55	243.968	311.396	322.525
ENSG00000116584.20	ARHGEF2	3699.87	1.31672	0.0866321	15.199	3.59e-52	8.07e-50	chr1:155946851-156007070	-	2056.85	2300.67	1994.69	4643.73	5644.73	5558.53
ENSG00000223542.1	RP1-283K11.3	41.3448	1.31735	0.333261	3.95291	7.72e-05	0.000646477	chr6:133435077-133439464	-	24.316	24.2449	21.7999	49.0021	55.4587	73.2474
ENSG00000279536.1	RP11-445N20.2	18.7452	1.33192	0.496324	2.68357	0.00728413	0.0338368	chr7:149881477-149882105	+	14.3035	12.9884	3.63332	21.8946	28.935	30.7167
ENSG00000241231.2	RP11-275H4.1	25.6803	1.33722	0.411373	3.25062	0.00115152	0.00708001	chr3:181372732-181442597	-	14.3035	12.1225	18.1666	37.5335	36.5132	35.4423
ENSG00000243323.7	PTPRVP	35.8456	1.33813	0.350921	3.81318	0.000137192	0.00108833	chr1:202168051-202189455	+	17.1642	20.7814	23.6166	45.8743	56.8366	50.8006
ENSG00000002746.15	HECW1	17.985	1.3391	0.508933	2.63119	0.00850853	0.0385089	chr7:43112629-43566001	+	11.4428	6.92712	12.7166	21.8946	20.6678	34.2609
ENSG00000236708.1	SDK1-AS1	16.9377	1.33969	0.515204	2.6003	0.00931417	0.0414544	chr7:3264032-3302452	-	5.72141	12.9884	9.08329	29.1927	21.0123	23.6282
ENSG00000231443.2	AC024937.6	23.5662	1.34642	0.428745	3.14037	0.00168732	0.00981547	chr3:195937243-195938739	+	14.3035	15.586	9.08329	34.4057	33.7575	34.2609
ENSG00000079337.16	RAPGEF3	22.5128	1.34753	0.451316	2.98577	0.00282863	0.015181	chr12:47734363-47771040	-	15.7339	11.2566	10.8999	26.065	28.5905	42.5308
ENSG00000037280.16	FLT4	20.6065	1.34939	0.468117	2.88258	0.00394433	0.0201875	chr5:180601506-180649624	-	10.0125	16.4519	7.26663	27.1075	34.4464	28.3538
ENSG00000223749.11	MIR503HG	97.6885	1.35157	0.263564	5.12803	2.93e-07	3.85e-06	chrX:134543119-134546642	-	40.0498	81.3937	39.9665	123.027	172.921	128.774
[truncated: 219 more rows]

## Sheet: Common_DEGs
Downregulated				Upregulated
[truncated: 866 more rows]
