# Supplementary material for: CD44 Depletion in Glioblastoma Cells Suppresses Growth and Stemness and Induces Senescence
Source: Cancers (Basel). 2022 Jul 31;14(15):3747. doi: 10.3390/cancers14153747 (PMC9367353; doi:10.3390/cancers14153747)
Supplement: Supplementary file 1 [file cancers-14-03747-s001.zip › Table S3_Hallmarks_Lists_CD44KO_vs_Parental.xlsx]

## Sheet: Enriched_Hallmarks
NAME	SIZE	ES	NES	NOM p-val	FDR q-val	FWER p-val	RANK AT MAX	LEADING EDGE
HALLMARK_ESTROGEN_RESPONSE_EARLY	200	-0.576728	-1.80637	0	0.00499286	0.004	3515	tags=40%, list=9%, signal=43%
HALLMARK_HYPOXIA	200	-0.573495	-1.79994	0	0.00249643	0.004	4069	tags=42%, list=10%, signal=46%
HALLMARK_ESTROGEN_RESPONSE_LATE	200	-0.53794	-1.68273	0	0.00533553	0.013	3313	tags=34%, list=8%, signal=36%
HALLMARK_REACTIVE_OXYGEN_SPECIES_PATHWAY	49	-0.607832	-1.57261	0.00720721	0.0206718	0.061	5774	tags=49%, list=14%, signal=57%
HALLMARK_GLYCOLYSIS	200	-0.498918	-1.56874	0	0.0168133	0.062	6048	tags=35%, list=15%, signal=41%
HALLMARK_IL6_JAK_STAT3_SIGNALING	87	-0.542053	-1.52232	0.00504202	0.0254824	0.112	5555	tags=32%, list=14%, signal=37%
HALLMARK_G2M_CHECKPOINT	200	-0.4798	-1.50606	0	0.0257596	0.13	10589	tags=56%, list=26%, signal=75%
HALLMARK_EPITHELIAL_MESENCHYMAL_TRANSITION	200	-0.46669	-1.46196	0.00151976	0.0388641	0.212	2375	tags=29%, list=6%, signal=31%
HALLMARK_HEDGEHOG_SIGNALING	36	-0.589268	-1.41701	0.0510563	0.0605346	0.352	2857	tags=47%, list=7%, signal=51%
HALLMARK_APICAL_JUNCTION	200	-0.436642	-1.37762	0.0133333	0.0847507	0.491	5017	tags=30%, list=12%, signal=34%
HALLMARK_ANDROGEN_RESPONSE	100	-0.469126	-1.36293	0.0346535	0.090967	0.545	5508	tags=41%, list=14%, signal=47%
HALLMARK_APOPTOSIS	161	-0.424	-1.31555	0.024	0.1354	0.709	4104	tags=27%, list=10%, signal=30%
HALLMARK_MITOTIC_SPINDLE	199	-0.416909	-1.30132	0.0244648	0.144892	0.753	4962	tags=26%, list=12%, signal=30%
HALLMARK_E2F_TARGETS	200	-0.410249	-1.29023	0.034375	0.147564	0.785	10928	tags=52%, list=27%, signal=72%
HALLMARK_MYOGENESIS	200	-0.403363	-1.27177	0.0459418	0.165504	0.853	5258	tags=29%, list=13%, signal=34%
HALLMARK_APICAL_SURFACE	44	-0.502452	-1.26794	0.129562	0.161001	0.864	5144	tags=36%, list=13%, signal=42%
HALLMARK_COMPLEMENT	200	-0.393745	-1.23615	0.065449	0.198402	0.92	4946	tags=28%, list=12%, signal=32%
HALLMARK_CHOLESTEROL_HOMEOSTASIS	74	-0.442605	-1.21686	0.129534	0.221563	0.956	4542	tags=42%, list=11%, signal=47%
HALLMARK_MTORC1_SIGNALING	200	-0.386147	-1.20883	0.0972222	0.223379	0.962	4593	tags=29%, list=11%, signal=32%
HALLMARK_UV_RESPONSE_DN	144	-0.380195	-1.15998	0.158228	0.314362	0.99	2706	tags=27%, list=7%, signal=29%
HALLMARK_IL2_STAT5_SIGNALING	199	-0.354582	-1.11381	0.18	0.416122	0.998	6091	tags=30%, list=15%, signal=35%
HALLMARK_MYC_TARGETS_V1	200	-0.356884	-1.11286	0.212214	0.399562	0.998	10502	tags=45%, list=26%, signal=61%
HALLMARK_FATTY_ACID_METABOLISM	158	-0.354542	-1.0871	0.256569	0.459732	1	5055	tags=26%, list=13%, signal=30%
HALLMARK_PANCREAS_BETA_CELLS	40	-0.434558	-1.08556	0.301887	0.445607	1	5582	tags=23%, list=14%, signal=26%
HALLMARK_KRAS_SIGNALING_UP	200	-0.344453	-1.07971	0.255708	0.444871	1	4370	tags=22%, list=11%, signal=25%
HALLMARK_OXIDATIVE_PHOSPHORYLATION	200	-0.342156	-1.07945	0.246106	0.428705	1	11520	tags=49%, list=29%, signal=68%
HALLMARK_XENOBIOTIC_METABOLISM	200	-0.344217	-1.07936	0.267964	0.413213	1	5945	tags=29%, list=15%, signal=34%
HALLMARK_UV_RESPONSE_UP	158	-0.350008	-1.06412	0.289515	0.439726	1	2924	tags=16%, list=7%, signal=18%
HALLMARK_INFLAMMATORY_RESPONSE	200	-0.339163	-1.06308	0.305864	0.427407	1	5125	tags=25%, list=13%, signal=28%
HALLMARK_P53_PATHWAY	200	-0.34173	-1.06248	0.301205	0.414851	1	4942	tags=24%, list=12%, signal=27%
HALLMARK_ADIPOGENESIS	200	-0.329734	-1.03777	0.348624	0.467675	1	5327	tags=24%, list=13%, signal=27%
HALLMARK_SPERMATOGENESIS	135	-0.328429	-0.988543	0.477778	0.591348	1	6146	tags=24%, list=15%, signal=29%
HALLMARK_NOTCH_SIGNALING	32	-0.400206	-0.970742	0.488656	0.627359	1	3228	tags=28%, list=8%, signal=31%
HALLMARK_KRAS_SIGNALING_DN	200	-0.30795	-0.96195	0.531915	0.635519	1	4638	tags=18%, list=12%, signal=20%
HALLMARK_INTERFERON_GAMMA_RESPONSE	200	-0.296775	-0.94113	0.629129	0.680666	1	5162	tags=23%, list=13%, signal=26%
HALLMARK_PI3K_AKT_MTOR_SIGNALING	105	-0.329078	-0.93925	0.576606	0.666755	1	5492	tags=22%, list=14%, signal=25%
HALLMARK_HEME_METABOLISM	200	-0.285771	-0.90209	0.724728	0.757025	1	4888	tags=20%, list=12%, signal=23%
HALLMARK_WNT_BETA_CATENIN_SIGNALING	42	-0.356879	-0.893004	0.636882	0.762877	1	4750	tags=33%, list=12%, signal=38%
HALLMARK_MYC_TARGETS_V2	58	-0.265248	-0.699975	0.980903	1	1	8934	tags=34%, list=22%, signal=44%
HALLMARK_PROTEIN_SECRETION	96	-0.237387	-0.671771	0.996683	0.996209	1	5084	tags=15%, list=13%, signal=17%

## Sheet: Estrogen_Response_Early
SYMBOL	TITLE	RANK IN GENE LIST	RANK METRIC SCORE	RUNNING ES	CORE ENRICHMENT
ADCY1	adenylate cyclase 1 [Source:HGNC Symbol;Acc:HGNC:232]	20	3.5702	0.0219558	No
KRT15	keratin 15 [Source:HGNC Symbol;Acc:HGNC:6421]	53	3.03795	0.0402563	No
KLF4	Kruppel like factor 4 [Source:HGNC Symbol;Acc:HGNC:6348]	140	2.5211	0.0539272	No
TSKU	tsukushi, small leucine rich proteoglycan [Source:HGNC Symbol;Acc:HGNC:28850]	391	1.80148	0.0588868	No
SYT12	synaptotagmin 12 [Source:HGNC Symbol;Acc:HGNC:18381]	441	1.71687	0.0684406	No
GAB2	GRB2 associated binding protein 2 [Source:HGNC Symbol;Acc:HGNC:14458]	482	1.67013	0.0779298	No
GFRA1	GDNF family receptor alpha 1 [Source:HGNC Symbol;Acc:HGNC:4243]	562	1.5908	0.0859252	No
NRIP1	nuclear receptor interacting protein 1 [Source:HGNC Symbol;Acc:HGNC:8001]	677	1.48106	0.0923373	No
RHOBTB3	Rho related BTB domain containing 3 [Source:HGNC Symbol;Acc:HGNC:18757]	701	1.46029	0.10094	No
NADSYN1	NAD synthetase 1 [Source:HGNC Symbol;Acc:HGNC:29832]	756	1.42944	0.108557	No
SOX3	SRY-box transcription factor 3 [Source:HGNC Symbol;Acc:HGNC:11199]	1034	1.2563	0.109398	No
KRT13	keratin 13 [Source:HGNC Symbol;Acc:HGNC:6415]	1397	1.0986	0.107078	No
REEP1	receptor accessory protein 1 [Source:HGNC Symbol;Acc:HGNC:25786]	1450	1.07817	0.112536	No
PDZK1	PDZ domain containing 1 [Source:HGNC Symbol;Acc:HGNC:8821]	1643	1.00759	0.113979	No
DEPTOR	DEP domain containing MTOR interacting protein [Source:HGNC Symbol;Acc:HGNC:22953]	1702	0.987579	0.118714	No
ABAT	4-aminobutyrate aminotransferase [Source:HGNC Symbol;Acc:HGNC:23]	1880	0.934592	0.120081	No
ADD3	adducin 3 [Source:HGNC Symbol;Acc:HGNC:245]	1969	0.913357	0.123584	No
INHBB	inhibin subunit beta B [Source:HGNC Symbol;Acc:HGNC:6067]	2142	0.882245	0.124748	No
OVOL2	ovo like zinc finger 2 [Source:HGNC Symbol;Acc:HGNC:15804]	2259	0.8744	0.127292	No
TPBG	trophoblast glycoprotein [Source:HGNC Symbol;Acc:HGNC:12004]	2395	0.854101	0.129223	No
CXCL12	C-X-C motif chemokine ligand 12 [Source:HGNC Symbol;Acc:HGNC:10672]	2578	0.817677	0.129727	No
CLDN7	claudin 7 [Source:HGNC Symbol;Acc:HGNC:2049]	2698	0.796124	0.131701	No
KRT19	keratin 19 [Source:HGNC Symbol;Acc:HGNC:6436]	3189	0.728046	0.123785	No
RPS6KA2	ribosomal protein S6 kinase A2 [Source:HGNC Symbol;Acc:HGNC:10431]	3376	0.69808	0.123433	No
ESRP2	epithelial splicing regulatory protein 2 [Source:HGNC Symbol;Acc:HGNC:26152]	3426	0.690725	0.12653	No
ELF1	E74 like ETS transcription factor 1 [Source:HGNC Symbol;Acc:HGNC:3316]	3699	0.650536	0.123686	No
DHCR7	7-dehydrocholesterol reductase [Source:HGNC Symbol;Acc:HGNC:2860]	3703	0.649681	0.127698	No
NCOR2	nuclear receptor corepressor 2 [Source:HGNC Symbol;Acc:HGNC:7673]	3814	0.636568	0.128898	No
AREG	amphiregulin [Source:HGNC Symbol;Acc:HGNC:651]	4070	0.62982	0.126357	No
RAB31	RAB31, member RAS oncogene family [Source:HGNC Symbol;Acc:HGNC:9771]	4819	0.540473	0.11068	No
ABHD2	abhydrolase domain containing 2, acylglycerol lipase [Source:HGNC Symbol;Acc:HGNC:18717]	4850	0.53689	0.113293	No
WFS1	wolframin ER transmembrane glycoprotein [Source:HGNC Symbol;Acc:HGNC:12762]	4982	0.525193	0.113257	No
MAST4	microtubule associated serine/threonine kinase family member 4 [Source:HGNC Symbol;Acc:HGNC:19037]	5148	0.509641	0.112255	No
TOB1	transducer of ERBB2, 1 [Source:HGNC Symbol;Acc:HGNC:11979]	5929	0.447488	0.0951769	No
KCNK15	potassium two pore domain channel subfamily K member 15 [Source:HGNC Symbol;Acc:HGNC:13814]	6749	0.432402	0.0770087	No
CALCR	calcitonin receptor [Source:HGNC Symbol;Acc:HGNC:1440]	7554	0.384177	0.0589196	No
PAPSS2	3'-phosphoadenosine 5'-phosphosulfate synthase 2 [Source:HGNC Symbol;Acc:HGNC:8604]	8078	0.342423	0.0477349	No
BAG1	BAG cochaperone 1 [Source:HGNC Symbol;Acc:HGNC:937]	8100	0.341066	0.0493455	No
NPY1R	neuropeptide Y receptor Y1 [Source:HGNC Symbol;Acc:HGNC:7956]	8794	0.288071	0.0334828	No
LAD1	ladinin 1 [Source:HGNC Symbol;Acc:HGNC:6472]	9309	0.287862	0.0221843	No
CALB2	calbindin 2 [Source:HGNC Symbol;Acc:HGNC:1435]	9738	0.287836	0.0130792	No
BCL11B	BAF chromatin remodeling complex subunit BCL11B [Source:HGNC Symbol;Acc:HGNC:13222]	9889	0.277972	0.0110025	No
GJA1	gap junction protein alpha 1 [Source:HGNC Symbol;Acc:HGNC:4274]	9903	0.276539	0.0124111	No
LRIG1	leucine rich repeats and immunoglobulin like domains 1 [Source:HGNC Symbol;Acc:HGNC:17360]	10002	0.269417	0.0116069	No
RRP12	ribosomal RNA processing 12 homolog [Source:HGNC Symbol;Acc:HGNC:29100]	10391	0.241679	0.00323146	No
JAK2	Janus kinase 2 [Source:HGNC Symbol;Acc:HGNC:6192]	11087	0.196435	-0.0132589	No
PMAIP1	phorbol-12-myristate-13-acetate-induced protein 1 [Source:HGNC Symbol;Acc:HGNC:9108]	11416	0.173011	-0.020536	No
MYBBP1A	MYB binding protein 1a [Source:HGNC Symbol;Acc:HGNC:7546]	11632	0.161093	-0.0250061	No
ARL3	ADP ribosylation factor like GTPase 3 [Source:HGNC Symbol;Acc:HGNC:694]	11667	0.158842	-0.0248737	No
CCN5	cellular communication network factor 5 [Source:HGNC Symbol;Acc:HGNC:12770]	12104	0.132501	-0.0351604	No
TGM2	transglutaminase 2 [Source:HGNC Symbol;Acc:HGNC:11778]	12151	0.130806	-0.0355105	No
FHL2	four and a half LIM domains 2 [Source:HGNC Symbol;Acc:HGNC:3703]	12275	0.123151	-0.0378728	No
THSD4	thrombospondin type 1 domain containing 4 [Source:HGNC Symbol;Acc:HGNC:25835]	12411	0.114443	-0.0405959	No
SFN	stratifin [Source:HGNC Symbol;Acc:HGNC:10773]	12437	0.112863	-0.0405234	No
AFF1	AF4/FMR2 family member 1 [Source:HGNC Symbol;Acc:HGNC:7135]	12586	0.103629	-0.0436461	No
PLAAT3	phospholipase A and acyltransferase 3 [Source:HGNC Symbol;Acc:HGNC:17825]	13232	0.07007	-0.0596563	No
MED24	mediator complex subunit 24 [Source:HGNC Symbol;Acc:HGNC:22963]	13625	0.0478906	-0.0693532	No
TUBB2B	tubulin beta 2B class IIb [Source:HGNC Symbol;Acc:HGNC:30829]	13709	0.0422255	-0.0712044	No
ASB13	ankyrin repeat and SOCS box containing 13 [Source:HGNC Symbol;Acc:HGNC:19765]	13806	0.0354415	-0.0734299	No
IGF1R	insulin like growth factor 1 receptor [Source:HGNC Symbol;Acc:HGNC:5465]	13892	0.0297367	-0.0754108	No
KDM4B	lysine demethylase 4B [Source:HGNC Symbol;Acc:HGNC:29136]	14179	0.0144076	-0.0826148	No
SEC14L2	SEC14 like lipid binding 2 [Source:HGNC Symbol;Acc:HGNC:10699]	14392	0.00093252	-0.0880161	No
FCMR	Fc fragment of IgM receptor [Source:HGNC Symbol;Acc:HGNC:14315]	15524	0	-0.116863	No
SLC27A2	solute carrier family 27 member 2 [Source:HGNC Symbol;Acc:HGNC:10996]	16611	0	-0.144562	No
PGR	progesterone receptor [Source:HGNC Symbol;Acc:HGNC:8910]	20973	0	-0.255792	No
MPPED2	metallophosphoesterase domain containing 2 [Source:HGNC Symbol;Acc:HGNC:1180]	22554	0	-0.296091	No
SLC19A2	solute carrier family 19 member 2 [Source:HGNC Symbol;Acc:HGNC:10938]	26816	-0.00585221	-0.404734	No
RETREG1	reticulophagy regulator 1 [Source:HGNC Symbol;Acc:HGNC:25964]	26878	-0.0101596	-0.406226	No
MAPT	microtubule associated protein tau [Source:HGNC Symbol;Acc:HGNC:6893]	27098	-0.0213079	-0.411677	No
TMEM164	transmembrane protein 164 [Source:HGNC Symbol;Acc:HGNC:26217]	27681	-0.0542762	-0.42618	No
SLC24A3	solute carrier family 24 member 3 [Source:HGNC Symbol;Acc:HGNC:10977]	27712	-0.0550305	-0.426599	No
PEX11A	peroxisomal biogenesis factor 11 alpha [Source:HGNC Symbol;Acc:HGNC:8852]	27767	-0.057513	-0.427615	No
SLC9A3R1	SLC9A3 regulator 1 [Source:HGNC Symbol;Acc:HGNC:11075]	28444	-0.0914605	-0.444281	No
MED13L	mediator complex subunit 13L [Source:HGNC Symbol;Acc:HGNC:22962]	28520	-0.094456	-0.445599	No
TBC1D30	TBC1 domain family member 30 [Source:HGNC Symbol;Acc:HGNC:29164]	28556	-0.0964465	-0.445885	No
FRK	fyn related Src family tyrosine kinase [Source:HGNC Symbol;Acc:HGNC:3955]	28875	-0.115676	-0.453268	No
SLC7A2	solute carrier family 7 member 2 [Source:HGNC Symbol;Acc:HGNC:11060]	28885	-0.116052	-0.452767	No
NBL1	NBL1, DAN family BMP antagonist [Source:HGNC Symbol;Acc:HGNC:7650]	29189	-0.133609	-0.459655	No
SLC39A6	solute carrier family 39 member 6 [Source:HGNC Symbol;Acc:HGNC:18607]	29306	-0.1421	-0.461719	No
DHRS3	dehydrogenase/reductase 3 [Source:HGNC Symbol;Acc:HGNC:17693]	29740	-0.167845	-0.471707	No
FKBP4	FKBP prolyl isomerase 4 [Source:HGNC Symbol;Acc:HGNC:3720]	29797	-0.170754	-0.472061	No
CLIC3	chloride intracellular channel 3 [Source:HGNC Symbol;Acc:HGNC:2064]	30420	-0.207468	-0.48662	No
CBFA2T3	CBFA2/RUNX1 partner transcriptional co-repressor 3 [Source:HGNC Symbol;Acc:HGNC:1537]	30594	-0.220317	-0.489646	No
ISG20L2	interferon stimulated exonuclease gene 20 like 2 [Source:HGNC Symbol;Acc:HGNC:25745]	30610	-0.220486	-0.488641	No
FARP1	FERM, ARH/RhoGEF and pleckstrin domain protein 1 [Source:HGNC Symbol;Acc:HGNC:3591]	30679	-0.224882	-0.48896	No
UNC119	unc-119 lipid binding chaperone [Source:HGNC Symbol;Acc:HGNC:12565]	30751	-0.230304	-0.489322	No
RAPGEFL1	Rap guanine nucleotide exchange factor like 1 [Source:HGNC Symbol;Acc:HGNC:17428]	30803	-0.234113	-0.48915	No
GLA	galactosidase alpha [Source:HGNC Symbol;Acc:HGNC:4296]	30834	-0.236712	-0.488425	No
CANT1	calcium activated nucleotidase 1 [Source:HGNC Symbol;Acc:HGNC:19721]	30987	-0.247158	-0.490747	No
ZNF185	zinc finger protein 185 with LIM domain [Source:HGNC Symbol;Acc:HGNC:12976]	31002	-0.248286	-0.489542	No
UGCG	UDP-glucose ceramide glucosyltransferase [Source:HGNC Symbol;Acc:HGNC:12524]	31198	-0.250708	-0.492938	No
AMFR	autocrine motility factor receptor [Source:HGNC Symbol;Acc:HGNC:463]	31215	-0.251616	-0.491762	No
TIAM1	TIAM Rac1 associated GEF 1 [Source:HGNC Symbol;Acc:HGNC:11805]	31293	-0.256863	-0.49211	No
NAV2	neuron navigator 2 [Source:HGNC Symbol;Acc:HGNC:15997]	31460	-0.266907	-0.494664	No
FAM102A	family with sequence similarity 102 member A [Source:HGNC Symbol;Acc:HGNC:31419]	31496	-0.269272	-0.493863	No
RARA	retinoic acid receptor alpha [Source:HGNC Symbol;Acc:HGNC:9864]	31974	-0.308812	-0.504086	No
SLC1A1	solute carrier family 1 member 1 [Source:HGNC Symbol;Acc:HGNC:10939]	31999	-0.310856	-0.502742	No
BCL2	BCL2 apoptosis regulator [Source:HGNC Symbol;Acc:HGNC:990]	32179	-0.324181	-0.505267	No
CD44	CD44 molecule (Indian blood group) [Source:HGNC Symbol;Acc:HGNC:1681]	32183	-0.324393	-0.503302	No
P2RY2	purinergic receptor P2Y2 [Source:HGNC Symbol;Acc:HGNC:8541]	32315	-0.335305	-0.504534	No
B4GALT1	beta-1,4-galactosyltransferase 1 [Source:HGNC Symbol;Acc:HGNC:924]	32364	-0.339309	-0.503623	No
OPN3	opsin 3 [Source:HGNC Symbol;Acc:HGNC:14007]	32471	-0.349924	-0.504124	No
NXT1	nuclear transport factor 2 like export factor 1 [Source:HGNC Symbol;Acc:HGNC:15913]	32500	-0.352179	-0.502622	No
KCNK5	potassium two pore domain channel subfamily K member 5 [Source:HGNC Symbol;Acc:HGNC:6280]	32501	-0.352193	-0.500406	No
MLPH	melanophilin [Source:HGNC Symbol;Acc:HGNC:29643]	32527	-0.353241	-0.498821	No
OLFM1	olfactomedin 1 [Source:HGNC Symbol;Acc:HGNC:17187]	32772	-0.366894	-0.502736	No
SLC22A5	solute carrier family 22 member 5 [Source:HGNC Symbol;Acc:HGNC:10969]	32785	-0.368041	-0.500726	No
ANXA9	annexin A9 [Source:HGNC Symbol;Acc:HGNC:547]	32846	-0.374222	-0.499901	No
RAB17	RAB17, member RAS oncogene family [Source:HGNC Symbol;Acc:HGNC:16523]	32850	-0.374373	-0.497622	No
CISH	cytokine inducible SH2 containing protein [Source:HGNC Symbol;Acc:HGNC:1984]	32897	-0.378872	-0.496411	No
PPIF	peptidylprolyl isomerase F [Source:HGNC Symbol;Acc:HGNC:9259]	32950	-0.383699	-0.495323	No
AR	androgen receptor [Source:HGNC Symbol;Acc:HGNC:644]	33158	-0.394396	-0.498121	No
SLC26A2	solute carrier family 26 member 2 [Source:HGNC Symbol;Acc:HGNC:10994]	33230	-0.400216	-0.497414	No
TJP3	tight junction protein 3 [Source:HGNC Symbol;Acc:HGNC:11829]	33781	-0.420856	-0.508793	No
GREB1	growth regulating estrogen receptor binding 1 [Source:HGNC Symbol;Acc:HGNC:24885]	34069	-0.450264	-0.51328	No
AKAP1	A-kinase anchoring protein 1 [Source:HGNC Symbol;Acc:HGNC:367]	34172	-0.46165	-0.512977	No
SNX24	sorting nexin 24 [Source:HGNC Symbol;Acc:HGNC:21533]	34206	-0.463879	-0.510899	No
TFF3	trefoil factor 3 [Source:HGNC Symbol;Acc:HGNC:11757]	34270	-0.464786	-0.509582	No
MSMB	microseminoprotein beta [Source:HGNC Symbol;Acc:HGNC:7372]	34276	-0.464786	-0.506784	No
DHRS2	dehydrogenase/reductase 2 [Source:HGNC Symbol;Acc:HGNC:18349]	34485	-0.465633	-0.509159	No
TFF1	trefoil factor 1 [Source:HGNC Symbol;Acc:HGNC:11755]	34789	-0.484889	-0.513836	No
MINDY1	MINDY lysine 48 deubiquitinase 1 [Source:HGNC Symbol;Acc:HGNC:25648]	34963	-0.488055	-0.515178	No
DYNLT3	dynein light chain Tctex-type 3 [Source:HGNC Symbol;Acc:HGNC:11694]	35039	-0.495715	-0.513971	No
ELOVL2	ELOVL fatty acid elongase 2 [Source:HGNC Symbol;Acc:HGNC:14416]	35178	-0.513485	-0.51426	No
SYNGR1	synaptogyrin 1 [Source:HGNC Symbol;Acc:HGNC:11498]	35510	-0.545812	-0.519268	Yes
FOXC1	forkhead box C1 [Source:HGNC Symbol;Acc:HGNC:3800]	35589	-0.556452	-0.517756	Yes
FKBP5	FKBP prolyl isomerase 5 [Source:HGNC Symbol;Acc:HGNC:3721]	35790	-0.586609	-0.519165	Yes
TIPARP	TCDD inducible poly(ADP-ribose) polymerase [Source:HGNC Symbol;Acc:HGNC:23696]	35839	-0.595809	-0.51664	Yes
KLK10	kallikrein related peptidase 10 [Source:HGNC Symbol;Acc:HGNC:6358]	35849	-0.597727	-0.513109	Yes
SLC37A1	solute carrier family 37 member 1 [Source:HGNC Symbol;Acc:HGNC:11024]	35946	-0.614381	-0.511691	Yes
XBP1	X-box binding protein 1 [Source:HGNC Symbol;Acc:HGNC:12801]	36048	-0.629609	-0.510305	Yes
SYBU	syntabulin [Source:HGNC Symbol;Acc:HGNC:26011]	36228	-0.662812	-0.5107	Yes
RET	ret proto-oncogene [Source:HGNC Symbol;Acc:HGNC:9967]	36272	-0.670433	-0.507578	Yes
SH3BP5	SH3 domain binding protein 5 [Source:HGNC Symbol;Acc:HGNC:10827]	36309	-0.678965	-0.504224	Yes
TPD52L1	TPD52 like 1 [Source:HGNC Symbol;Acc:HGNC:12006]	36325	-0.680952	-0.500321	Yes
CELSR1	cadherin EGF LAG seven-pass G-type receptor 1 [Source:HGNC Symbol;Acc:HGNC:1850]	36349	-0.685405	-0.496595	Yes
CYP26B1	cytochrome P450 family 26 subfamily B member 1 [Source:HGNC Symbol;Acc:HGNC:20581]	36410	-0.698114	-0.493732	Yes
ABCA3	ATP binding cassette subfamily A member 3 [Source:HGNC Symbol;Acc:HGNC:33]	36704	-0.747386	-0.496503	Yes
PRSS23	serine protease 23 [Source:HGNC Symbol;Acc:HGNC:14370]	36733	-0.754986	-0.492466	Yes
RHOD	ras homolog family member D [Source:HGNC Symbol;Acc:HGNC:670]	36749	-0.760726	-0.488061	Yes
ABLIM1	actin binding LIM protein 1 [Source:HGNC Symbol;Acc:HGNC:78]	36800	-0.773339	-0.48447	Yes
ADCY9	adenylate cyclase 9 [Source:HGNC Symbol;Acc:HGNC:240]	36848	-0.785968	-0.480723	Yes
SIAH2	siah E3 ubiquitin protein ligase 2 [Source:HGNC Symbol;Acc:HGNC:10858]	36872	-0.790858	-0.476333	Yes
MREG	melanoregulin [Source:HGNC Symbol;Acc:HGNC:25478]	36883	-0.793155	-0.471598	Yes
PODXL	podocalyxin like [Source:HGNC Symbol;Acc:HGNC:9171]	36989	-0.814204	-0.469152	Yes
IL6ST	interleukin 6 signal transducer [Source:HGNC Symbol;Acc:HGNC:6021]	37224	-0.865201	-0.469676	Yes
ELOVL5	ELOVL fatty acid elongase 5 [Source:HGNC Symbol;Acc:HGNC:21308]	37278	-0.878399	-0.4655	Yes
FOS	Fos proto-oncogene, AP-1 transcription factor subunit [Source:HGNC Symbol;Acc:HGNC:3796]	37304	-0.887981	-0.46055	Yes
KRT18	keratin 18 [Source:HGNC Symbol;Acc:HGNC:6430]	37516	-0.949198	-0.459959	Yes
KAZN	kazrin, periplakin interacting protein [Source:HGNC Symbol;Acc:HGNC:29173]	37572	-0.967763	-0.455272	Yes
INPP5F	inositol polyphosphate-5-phosphatase F [Source:HGNC Symbol;Acc:HGNC:17054]	37620	-0.988497	-0.450251	Yes
MYOF	myoferlin [Source:HGNC Symbol;Acc:HGNC:3656]	37680	-1.01408	-0.445374	Yes
FDFT1	farnesyl-diphosphate farnesyltransferase 1 [Source:HGNC Symbol;Acc:HGNC:3629]	37695	-1.01819	-0.439324	Yes
ENDOD1	endonuclease domain containing 1 [Source:HGNC Symbol;Acc:HGNC:29129]	37698	-1.01952	-0.43296	Yes
SVIL	supervillin [Source:HGNC Symbol;Acc:HGNC:11480]	37770	-1.0487	-0.428172	Yes
ITPK1	inositol-tetrakisphosphate 1-kinase [Source:HGNC Symbol;Acc:HGNC:6177]	37848	-1.07567	-0.423367	Yes
HSPB8	heat shock protein family B (small) member 8 [Source:HGNC Symbol;Acc:HGNC:30171]	37849	-1.0761	-0.416595	Yes
SULT2B1	sulfotransferase family 2B member 1 [Source:HGNC Symbol;Acc:HGNC:11459]	37882	-1.09249	-0.410537	Yes
CHPT1	choline phosphotransferase 1 [Source:HGNC Symbol;Acc:HGNC:17852]	37913	-1.1051	-0.404348	Yes
ALDH3B1	aldehyde dehydrogenase 3 family member B1 [Source:HGNC Symbol;Acc:HGNC:410]	37921	-1.10845	-0.397551	Yes
RBBP8	RB binding protein 8, endonuclease [Source:HGNC Symbol;Acc:HGNC:9891]	37942	-1.11583	-0.39104	Yes
BLVRB	biliverdin reductase B [Source:HGNC Symbol;Acc:HGNC:1063]	37963	-1.12527	-0.384469	Yes
AQP3	aquaporin 3 (Gill blood group) [Source:HGNC Symbol;Acc:HGNC:636]	37967	-1.12784	-0.377449	Yes
SCARB1	scavenger receptor class B member 1 [Source:HGNC Symbol;Acc:HGNC:1664]	37978	-1.133	-0.370574	Yes
MUC1	mucin 1, cell surface associated [Source:HGNC Symbol;Acc:HGNC:7508]	38056	-1.17393	-0.365151	Yes
FASN	fatty acid synthase [Source:HGNC Symbol;Acc:HGNC:3594]	38092	-1.18697	-0.358575	Yes
WWC1	WW and C2 domain containing 1 [Source:HGNC Symbol;Acc:HGNC:29435]	38124	-1.20608	-0.351776	Yes
TTC39A	tetratricopeptide repeat domain 39A [Source:HGNC Symbol;Acc:HGNC:18657]	38162	-1.22841	-0.34499	Yes
TGIF2	TGFB induced factor homeobox 2 [Source:HGNC Symbol;Acc:HGNC:15764]	38242	-1.27434	-0.338986	Yes
EGR3	early growth response 3 [Source:HGNC Symbol;Acc:HGNC:3240]	38246	-1.27753	-0.331023	Yes
STC2	stanniocalcin 2 [Source:HGNC Symbol;Acc:HGNC:11374]	38295	-1.30417	-0.324041	Yes
TMPRSS3	transmembrane serine protease 3 [Source:HGNC Symbol;Acc:HGNC:11877]	38428	-1.40178	-0.318587	Yes
HR	HR lysine demethylase and nuclear receptor corepressor [Source:HGNC Symbol;Acc:HGNC:5172]	38439	-1.41076	-0.309964	Yes
RASGRP1	RAS guanyl releasing protein 1 [Source:HGNC Symbol;Acc:HGNC:9878]	38442	-1.41224	-0.301129	Yes
TFAP2C	transcription factor AP-2 gamma [Source:HGNC Symbol;Acc:HGNC:11744]	38450	-1.42116	-0.292364	Yes
IL17RB	interleukin 17 receptor B [Source:HGNC Symbol;Acc:HGNC:18015]	38457	-1.43025	-0.283517	Yes
CCND1	cyclin D1 [Source:HGNC Symbol;Acc:HGNC:1582]	38482	-1.45099	-0.274999	Yes
SLC16A1	solute carrier family 16 member 1 [Source:HGNC Symbol;Acc:HGNC:10922]	38489	-1.45515	-0.265995	Yes
MYB	MYB proto-oncogene, transcription factor [Source:HGNC Symbol;Acc:HGNC:7545]	38524	-1.4843	-0.257522	Yes
CELSR2	cadherin EGF LAG seven-pass G-type receptor 2 [Source:HGNC Symbol;Acc:HGNC:3231]	38564	-1.51212	-0.249002	Yes
SLC2A1	solute carrier family 2 member 1 [Source:HGNC Symbol;Acc:HGNC:11005]	38615	-1.55248	-0.240508	Yes
PDLIM3	PDZ and LIM domain 3 [Source:HGNC Symbol;Acc:HGNC:20767]	38659	-1.5871	-0.231618	Yes
SCNN1A	sodium channel epithelial 1 subunit alpha [Source:HGNC Symbol;Acc:HGNC:10599]	38691	-1.61886	-0.222221	Yes
FLNB	filamin B [Source:HGNC Symbol;Acc:HGNC:3755]	38730	-1.66651	-0.212704	Yes
IGFBP4	insulin like growth factor binding protein 4 [Source:HGNC Symbol;Acc:HGNC:5473]	38748	-1.68365	-0.202543	Yes
MICB	MHC class I polypeptide-related sequence B [Source:HGNC Symbol;Acc:HGNC:7091]	38768	-1.70907	-0.192273	Yes
MYBL1	MYB proto-oncogene like 1 [Source:HGNC Symbol;Acc:HGNC:7547]	38853	-1.83332	-0.182879	Yes
KRT8	keratin 8 [Source:HGNC Symbol;Acc:HGNC:6446]	38865	-1.84264	-0.171565	Yes
SEMA3B	semaphorin 3B [Source:HGNC Symbol;Acc:HGNC:10724]	38867	-1.84956	-0.159952	Yes
MYC	MYC proto-oncogene, bHLH transcription factor [Source:HGNC Symbol;Acc:HGNC:7553]	38902	-1.89498	-0.148894	Yes
BHLHE40	basic helix-loop-helix family member e40 [Source:HGNC Symbol;Acc:HGNC:1046]	38929	-1.92128	-0.137468	Yes
CA12	carbonic anhydrase 12 [Source:HGNC Symbol;Acc:HGNC:1371]	38941	-1.93774	-0.125555	Yes
PTGES	prostaglandin E synthase [Source:HGNC Symbol;Acc:HGNC:9599]	39023	-2.03529	-0.114813	Yes
KLF10	Kruppel like factor 10 [Source:HGNC Symbol;Acc:HGNC:11810]	39057	-2.10079	-0.102436	Yes
SLC7A5	solute carrier family 7 member 5 [Source:HGNC Symbol;Acc:HGNC:11063]	39089	-2.13744	-0.0897761	Yes
DLC1	DLC1 Rho GTPase activating protein [Source:HGNC Symbol;Acc:HGNC:2897]	39194	-2.34206	-0.077691	Yes
OLFML3	olfactomedin like 3 [Source:HGNC Symbol;Acc:HGNC:24956]	39349	-2.97484	-0.0628994	Yes
ELF3	E74 like ETS transcription factor 3 [Source:HGNC Symbol;Acc:HGNC:3318]	39363	-3.15634	-0.0433693	Yes
SLC1A4	solute carrier family 1 member 4 [Source:HGNC Symbol;Acc:HGNC:10942]	39376	-3.30746	-0.0228628	Yes
HES1	hes family bHLH transcription factor 1 [Source:HGNC Symbol;Acc:HGNC:5192]	39396	-3.7508	0.000254988	Yes

## Sheet: Hypoxia
NAME	SYMBOL	TITLE	RANK IN GENE LIST	RANK METRIC SCORE	RUNNING ES	CORE ENRICHMENT
row_0	SERPINE1	serpin family E member 1 [Source:HGNC Symbol;Acc:HGNC:8583]	84	3.58914	0.017501	No
row_1	HOXB9	homeobox B9 [Source:HGNC Symbol;Acc:HGNC:5120]	177	2.88346	0.0309492	No
row_2	IL6	interleukin 6 [Source:HGNC Symbol;Acc:HGNC:6018]	357	2.23092	0.0386628	No
row_3	STC1	stanniocalcin 1 [Source:HGNC Symbol;Acc:HGNC:11373]	414	2.10453	0.0487563	No
row_4	GPC1	glypican 1 [Source:HGNC Symbol;Acc:HGNC:4449]	619	1.72154	0.0530646	No
row_5	BRS3	bombesin receptor subtype 3 [Source:HGNC Symbol;Acc:HGNC:1113]	622	1.71929	0.0624025	No
row_6	ZFP36	ZFP36 ring finger protein [Source:HGNC Symbol;Acc:HGNC:12862]	761	1.57763	0.0675723	No
row_7	HAS1	hyaluronan synthase 1 [Source:HGNC Symbol;Acc:HGNC:4818]	932	1.4061	0.0710067	No
row_8	IGFBP3	insulin like growth factor binding protein 3 [Source:HGNC Symbol;Acc:HGNC:5472]	1029	1.33851	0.0759192	No
row_9	ALDOC	aldolase, fructose-bisphosphate C [Source:HGNC Symbol;Acc:HGNC:418]	1109	1.28398	0.0809583	No
row_10	TMEM45A	transmembrane protein 45A [Source:HGNC Symbol;Acc:HGNC:25480]	1369	1.15784	0.0808158	No
row_11	CAVIN3	caveolae associated protein 3 [Source:HGNC Symbol;Acc:HGNC:9400]	1465	1.11253	0.0845193	No
row_12	DUSP1	dual specificity phosphatase 1 [Source:HGNC Symbol;Acc:HGNC:3064]	1478	1.10272	0.0902409	No
row_13	ANGPTL4	angiopoietin like 4 [Source:HGNC Symbol;Acc:HGNC:16039]	1544	1.07787	0.094504	No
row_14	BHLHE40	basic helix-loop-helix family member e40 [Source:HGNC Symbol;Acc:HGNC:1046]	1689	1.03176	0.0965434	No
row_15	F3	coagulation factor III, tissue factor [Source:HGNC Symbol;Acc:HGNC:3541]	2040	0.936085	0.0929187	No
row_16	LXN	latexin [Source:HGNC Symbol;Acc:HGNC:13347]	2041	0.935607	0.0980274	No
row_17	CA12	carbonic anhydrase 12 [Source:HGNC Symbol;Acc:HGNC:1371]	2159	0.903468	0.10004	No
row_18	FOS	Fos proto-oncogene, AP-1 transcription factor subunit [Source:HGNC Symbol;Acc:HGNC:3796]	2718	0.826659	0.0906263	No
row_19	COL5A1	collagen type V alpha 1 chain [Source:HGNC Symbol;Acc:HGNC:2209]	2959	0.786745	0.0889318	No
row_20	PKLR	pyruvate kinase L/R [Source:HGNC Symbol;Acc:HGNC:9020]	3002	0.780346	0.0921443	No
row_21	CHST2	carbohydrate sulfotransferase 2 [Source:HGNC Symbol;Acc:HGNC:1970]	3148	0.75734	0.0926604	No
row_22	PLAC8	placenta associated 8 [Source:HGNC Symbol;Acc:HGNC:19254]	3299	0.730774	0.0929066	No
row_23	VHL	von Hippel-Lindau tumor suppressor [Source:HGNC Symbol;Acc:HGNC:12687]	3383	0.71432	0.0947353	No
row_24	KLHL24	kelch like family member 24 [Source:HGNC Symbol;Acc:HGNC:25947]	3625	0.67515	0.0924065	No
row_25	ILVBL	ilvB acetolactate synthase like [Source:HGNC Symbol;Acc:HGNC:6041]	3706	0.661537	0.0940218	No
row_26	AMPD3	adenosine monophosphate deaminase 3 [Source:HGNC Symbol;Acc:HGNC:470]	3745	0.655454	0.0966523	No
row_27	CXCR4	C-X-C motif chemokine receptor 4 [Source:HGNC Symbol;Acc:HGNC:2561]	3852	0.639809	0.0975001	No
row_28	CHST3	carbohydrate sulfotransferase 3 [Source:HGNC Symbol;Acc:HGNC:1971]	4314	0.577587	0.0891473	No
row_29	SRPX	sushi repeat containing protein X-linked [Source:HGNC Symbol;Acc:HGNC:11309]	4465	0.561532	0.0884694	No
row_30	KDELR3	KDEL endoplasmic reticulum protein retention receptor 3 [Source:HGNC Symbol;Acc:HGNC:6306]	4519	0.553926	0.0901711	No
row_31	GAA	glucosidase alpha, acid [Source:HGNC Symbol;Acc:HGNC:4065]	4802	0.524173	0.0859945	No
row_32	GCK	glucokinase [Source:HGNC Symbol;Acc:HGNC:4195]	5076	0.503286	0.0819285	No
row_33	TES	testin LIM domain protein [Source:HGNC Symbol;Acc:HGNC:14620]	5212	0.492211	0.0812465	No
row_34	IDS	iduronate 2-sulfatase [Source:HGNC Symbol;Acc:HGNC:5389]	5285	0.49152	0.0821332	No
row_35	SIAH2	siah E3 ubiquitin protein ligase 2 [Source:HGNC Symbol;Acc:HGNC:10858]	5426	0.488568	0.0813065	No
row_36	MIF	macrophage migration inhibitory factor [Source:HGNC Symbol;Acc:HGNC:7097]	6892	0.42082	0.0470378	No
row_37	GLRX	glutaredoxin [Source:HGNC Symbol;Acc:HGNC:4330]	7387	0.403586	0.0369112	No
row_38	PGF	placental growth factor [Source:HGNC Symbol;Acc:HGNC:8893]	7570	0.388816	0.0344916	No
row_39	GALK1	galactokinase 1 [Source:HGNC Symbol;Acc:HGNC:4118]	7605	0.386171	0.0357515	No
row_40	HSPA5	heat shock protein family A (Hsp70) member 5 [Source:HGNC Symbol;Acc:HGNC:5238]	7755	0.374294	0.0340762	No
row_41	BCAN	brevican [Source:HGNC Symbol;Acc:HGNC:23059]	7853	0.366058	0.0336539	No
row_42	AK4	adenylate kinase 4 [Source:HGNC Symbol;Acc:HGNC:363]	7900	0.361634	0.0344803	No
row_43	DDIT3	DNA damage inducible transcript 3 [Source:HGNC Symbol;Acc:HGNC:2726]	7990	0.353579	0.0341895	No
row_44	LDHA	lactate dehydrogenase A [Source:HGNC Symbol;Acc:HGNC:6535]	8052	0.349486	0.0345753	No
row_45	GBE1	1,4-alpha-glucan branching enzyme 1 [Source:HGNC Symbol;Acc:HGNC:4180]	8156	0.339867	0.0338601	No
row_46	NOCT	nocturnin [Source:HGNC Symbol;Acc:HGNC:14254]	8868	0.283965	0.0176641	No
row_47	CCN5	cellular communication network factor 5 [Source:HGNC Symbol;Acc:HGNC:12770]	9130	0.267581	0.0126105	No
row_48	NAGK	N-acetylglucosamine kinase [Source:HGNC Symbol;Acc:HGNC:17174]	9181	0.263099	0.0127991	No
row_49	PGM2	phosphoglucomutase 2 [Source:HGNC Symbol;Acc:HGNC:8906]	9238	0.260152	0.0128219	No
row_50	PAM	peptidylglycine alpha-amidating monooxygenase [Source:HGNC Symbol;Acc:HGNC:8596]	9516	0.241207	0.00722499	No
row_51	NDST1	N-deacetylase and N-sulfotransferase 1 [Source:HGNC Symbol;Acc:HGNC:7680]	9615	0.234693	0.00606039	No
row_52	ATF3	activating transcription factor 3 [Source:HGNC Symbol;Acc:HGNC:785]	9825	0.21724	0.00202993	No
row_53	P4HA2	prolyl 4-hydroxylase subunit alpha 2 [Source:HGNC Symbol;Acc:HGNC:8547]	9885	0.213337	0.00172217	No
row_54	SULT2B1	sulfotransferase family 2B member 1 [Source:HGNC Symbol;Acc:HGNC:11459]	10137	0.19592	-0.00347303	No
row_55	TIPARP	TCDD inducible poly(ADP-ribose) polymerase [Source:HGNC Symbol;Acc:HGNC:23696]	10320	0.185706	-0.00700176	No
row_56	PRDX5	peroxiredoxin 5 [Source:HGNC Symbol;Acc:HGNC:9355]	10848	0.157228	-0.0192972	No
row_57	TPBG	trophoblast glycoprotein [Source:HGNC Symbol;Acc:HGNC:12004]	10882	0.154489	-0.0192773	No
row_58	PLIN2	perilipin 2 [Source:HGNC Symbol;Acc:HGNC:248]	11522	0.113941	-0.0346047	No
row_59	MXI1	MAX interactor 1, dimerization protein [Source:HGNC Symbol;Acc:HGNC:7534]	11877	0.0916593	-0.04294	No
row_60	EFNA3	ephrin A3 [Source:HGNC Symbol;Acc:HGNC:3223]	11917	0.0891745	-0.0434266	No
row_61	ALDOB	aldolase, fructose-bisphosphate B [Source:HGNC Symbol;Acc:HGNC:417]	12841	0.0244034	-0.0663315	No
row_62	HEXA	hexosaminidase subunit alpha [Source:HGNC Symbol;Acc:HGNC:4878]	12936	0.0175603	-0.0685818	No
row_63	PYGM	glycogen phosphorylase, muscle associated [Source:HGNC Symbol;Acc:HGNC:9726]	13045	0.010065	-0.0712225	No
row_64	MAP3K1	mitogen-activated protein kinase kinase kinase 1 [Source:HGNC Symbol;Acc:HGNC:6848]	13058	0.00896047	-0.0714731	No
row_65	DCN	decorin [Source:HGNC Symbol;Acc:HGNC:2705]	13578	0	-0.0844274	No
row_66	B4GALNT2	beta-1,4-N-acetyl-galactosaminyltransferase 2 [Source:HGNC Symbol;Acc:HGNC:24136]	18563	0	-0.208828	No
row_67	EDN2	endothelin 2 [Source:HGNC Symbol;Acc:HGNC:3177]	18769	0	-0.213945	No
row_68	PKP1	plakophilin 1 [Source:HGNC Symbol;Acc:HGNC:9023]	20252	0	-0.250936	No
row_69	PGAM2	phosphoglycerate mutase 2 [Source:HGNC Symbol;Acc:HGNC:8889]	21239	0	-0.275547	No
row_70	IGFBP1	insulin like growth factor binding protein 1 [Source:HGNC Symbol;Acc:HGNC:5469]	21469	0	-0.281262	No
row_71	LALBA	lactalbumin alpha [Source:HGNC Symbol;Acc:HGNC:6480]	22281	0	-0.301505	No
row_72	NCAN	neurocan [Source:HGNC Symbol;Acc:HGNC:2465]	26517	-0.00359102	-0.407191	No
row_73	PPP1R15A	protein phosphatase 1 regulatory subunit 15A [Source:HGNC Symbol;Acc:HGNC:14375]	27859	-0.0571386	-0.440351	No
row_74	TNFAIP3	TNF alpha induced protein 3 [Source:HGNC Symbol;Acc:HGNC:11896]	28017	-0.0693412	-0.443891	No
row_75	XPNPEP1	X-prolyl aminopeptidase 1 [Source:HGNC Symbol;Acc:HGNC:12822]	28146	-0.0791217	-0.446654	No
row_76	EGFR	epidermal growth factor receptor [Source:HGNC Symbol;Acc:HGNC:3236]	28173	-0.0815119	-0.446858	No
row_77	KIF5A	kinesin family member 5A [Source:HGNC Symbol;Acc:HGNC:6323]	28200	-0.0836671	-0.44705	No
row_78	NR3C1	nuclear receptor subfamily 3 group C member 1 [Source:HGNC Symbol;Acc:HGNC:7978]	28463	-0.10353	-0.453024	No
row_79	ATP7A	ATPase copper transporting alpha [Source:HGNC Symbol;Acc:HGNC:869]	28498	-0.106102	-0.453293	No
row_80	JUN	Jun proto-oncogene, AP-1 transcription factor subunit [Source:HGNC Symbol;Acc:HGNC:6204]	28814	-0.127209	-0.460461	No
row_81	PHKG1	phosphorylase kinase catalytic subunit gamma 1 [Source:HGNC Symbol;Acc:HGNC:8930]	28881	-0.13112	-0.461393	No
row_82	EFNA1	ephrin A1 [Source:HGNC Symbol;Acc:HGNC:3221]	29015	-0.140233	-0.463947	No
row_83	CDKN1C	cyclin dependent kinase inhibitor 1C [Source:HGNC Symbol;Acc:HGNC:1786]	29473	-0.170806	-0.474421	No
row_84	IER3	immediate early response 3 [Source:HGNC Symbol;Acc:HGNC:5392]	29546	-0.176044	-0.475256	No
row_85	P4HA1	prolyl 4-hydroxylase subunit alpha 1 [Source:HGNC Symbol;Acc:HGNC:8546]	29556	-0.176547	-0.474517	No
row_86	PCK1	phosphoenolpyruvate carboxykinase 1 [Source:HGNC Symbol;Acc:HGNC:8724]	29652	-0.183367	-0.475887	No
row_87	CDKN1B	cyclin dependent kinase inhibitor 1B [Source:HGNC Symbol;Acc:HGNC:1785]	29777	-0.19113	-0.477939	No
row_88	SAP30	Sin3A associated protein 30 [Source:HGNC Symbol;Acc:HGNC:10532]	30050	-0.208361	-0.48359	No
row_89	SLC37A4	solute carrier family 37 member 4 [Source:HGNC Symbol;Acc:HGNC:4061]	30552	-0.241399	-0.494777	No
row_90	DTNA	dystrobrevin alpha [Source:HGNC Symbol;Acc:HGNC:3057]	30613	-0.2457	-0.494933	No
row_91	TPI1	triosephosphate isomerase 1 [Source:HGNC Symbol;Acc:HGNC:12009]	30691	-0.251694	-0.49548	No
row_92	CASP6	caspase 6 [Source:HGNC Symbol;Acc:HGNC:1507]	30807	-0.260078	-0.496931	No
row_93	INHA	inhibin subunit alpha [Source:HGNC Symbol;Acc:HGNC:6065]	30814	-0.261253	-0.495654	No
row_94	BTG1	BTG anti-proliferation factor 1 [Source:HGNC Symbol;Acc:HGNC:1130]	30941	-0.271032	-0.497319	No
row_95	NDST2	N-deacetylase and N-sulfotransferase 2 [Source:HGNC Symbol;Acc:HGNC:7681]	31603	-0.31867	-0.512078	No
row_96	KDM3A	lysine demethylase 3A [Source:HGNC Symbol;Acc:HGNC:20815]	31808	-0.335667	-0.515337	No
row_97	HMOX1	heme oxygenase 1 [Source:HGNC Symbol;Acc:HGNC:5013]	31903	-0.343153	-0.515809	No
row_98	PFKFB3	6-phosphofructo-2-kinase/fructose-2,6-biphosphatase 3 [Source:HGNC Symbol;Acc:HGNC:8874]	31947	-0.347847	-0.514983	No
row_99	RORA	RAR related orphan receptor A [Source:HGNC Symbol;Acc:HGNC:10258]	32352	-0.385586	-0.522962	No
row_100	SLC25A1	solute carrier family 25 member 1 [Source:HGNC Symbol;Acc:HGNC:10979]	32387	-0.389039	-0.521686	No
row_101	LDHC	lactate dehydrogenase C [Source:HGNC Symbol;Acc:HGNC:6544]	33810	-0.435529	-0.554801	No
row_102	GRHPR	glyoxylate and hydroxypyruvate reductase [Source:HGNC Symbol;Acc:HGNC:4570]	34272	-0.466622	-0.56376	No
row_103	SLC6A6	solute carrier family 6 member 6 [Source:HGNC Symbol;Acc:HGNC:11052]	34320	-0.472088	-0.562355	No
row_104	DPYSL4	dihydropyrimidinase like 4 [Source:HGNC Symbol;Acc:HGNC:3016]	34416	-0.482181	-0.562094	No
row_105	ADORA2B	adenosine A2b receptor [Source:HGNC Symbol;Acc:HGNC:264]	34634	-0.493084	-0.564817	No
row_106	TGFBI	transforming growth factor beta induced [Source:HGNC Symbol;Acc:HGNC:11771]	34876	-0.497792	-0.568115	No
row_107	B3GALT6	beta-1,3-galactosyltransferase 6 [Source:HGNC Symbol;Acc:HGNC:17978]	34928	-0.503697	-0.566637	No
row_108	ANXA2	annexin A2 [Source:HGNC Symbol;Acc:HGNC:537]	35002	-0.510522	-0.565672	No
row_109	RRAGD	Ras related GTP binding D [Source:HGNC Symbol;Acc:HGNC:19903]	35211	-0.527229	-0.567985	No
row_110	GAPDHS	glyceraldehyde-3-phosphate dehydrogenase, spermatogenic [Source:HGNC Symbol;Acc:HGNC:24864]	35376	-0.541592	-0.569121	No
row_111	ENO3	enolase 3 [Source:HGNC Symbol;Acc:HGNC:3354]	35404	-0.544394	-0.566822	No
row_112	MT2A	metallothionein 2A [Source:HGNC Symbol;Acc:HGNC:7406]	35501	-0.560117	-0.56616	No
row_113	PNRC1	proline rich nuclear receptor coactivator 1 [Source:HGNC Symbol;Acc:HGNC:17278]	35723	-0.594131	-0.568432	No
row_114	SDC3	syndecan 3 [Source:HGNC Symbol;Acc:HGNC:10660]	35830	-0.608333	-0.567756	No
row_115	FOXO3	forkhead box O3 [Source:HGNC Symbol;Acc:HGNC:3821]	35857	-0.612856	-0.565059	No
row_116	GAPDH	glyceraldehyde-3-phosphate dehydrogenase [Source:HGNC Symbol;Acc:HGNC:4141]	36196	-0.66851	-0.569845	Yes
row_117	CAV1	caveolin 1 [Source:HGNC Symbol;Acc:HGNC:1527]	36199	-0.668984	-0.566242	Yes
row_118	PFKL	phosphofructokinase, liver type [Source:HGNC Symbol;Acc:HGNC:8876]	36243	-0.678105	-0.563613	Yes
row_119	EXT1	exostosin glycosyltransferase 1 [Source:HGNC Symbol;Acc:HGNC:3512]	36291	-0.687055	-0.561034	Yes
row_120	PGM1	phosphoglucomutase 1 [Source:HGNC Symbol;Acc:HGNC:8905]	36486	-0.721914	-0.561935	Yes
row_121	PGK1	phosphoglycerate kinase 1 [Source:HGNC Symbol;Acc:HGNC:8896]	36675	-0.756732	-0.562495	Yes
row_122	CAVIN1	caveolae associated protein 1 [Source:HGNC Symbol;Acc:HGNC:9688]	36694	-0.758566	-0.558803	Yes
row_123	ANKZF1	ankyrin repeat and zinc finger peptidyl tRNA hydrolase 1 [Source:HGNC Symbol;Acc:HGNC:25527]	36867	-0.791222	-0.558776	Yes
row_124	JMJD6	jumonji domain containing 6, arginine demethylase and lysine hydroxylase [Source:HGNC Symbol;Acc:HGNC:19355]	36877	-0.793372	-0.554668	Yes
row_125	ADM	adrenomedullin [Source:HGNC Symbol;Acc:HGNC:259]	36914	-0.804253	-0.551175	Yes
row_126	MAFF	MAF bZIP transcription factor F [Source:HGNC Symbol;Acc:HGNC:6780]	36915	-0.804335	-0.546783	Yes
row_127	ZNF292	zinc finger protein 292 [Source:HGNC Symbol;Acc:HGNC:18410]	36916	-0.804362	-0.542391	Yes
row_128	GPC3	glypican 3 [Source:HGNC Symbol;Acc:HGNC:4451]	36919	-0.805354	-0.538044	Yes
row_129	IRS2	insulin receptor substrate 2 [Source:HGNC Symbol;Acc:HGNC:6126]	36932	-0.808631	-0.533928	Yes
row_130	BNIP3L	BCL2 interacting protein 3 like [Source:HGNC Symbol;Acc:HGNC:1085]	36933	-0.808635	-0.529513	Yes
row_131	FAM162A	family with sequence similarity 162 member A [Source:HGNC Symbol;Acc:HGNC:17865]	36997	-0.818583	-0.526615	Yes
row_132	BGN	biglycan [Source:HGNC Symbol;Acc:HGNC:1044]	37076	-0.829357	-0.524034	Yes
row_133	PRKCA	protein kinase C alpha [Source:HGNC Symbol;Acc:HGNC:9393]	37079	-0.83066	-0.519548	Yes
row_134	NFIL3	nuclear factor, interleukin 3 regulated [Source:HGNC Symbol;Acc:HGNC:7787]	37152	-0.841568	-0.51675	Yes
row_135	ERO1A	endoplasmic reticulum oxidoreductase 1 alpha [Source:HGNC Symbol;Acc:HGNC:13280]	37173	-0.845173	-0.512634	Yes
row_136	CSRP2	cysteine and glycine rich protein 2 [Source:HGNC Symbol;Acc:HGNC:2470]	37214	-0.849977	-0.508992	Yes
row_137	FBP1	fructose-bisphosphatase 1 [Source:HGNC Symbol;Acc:HGNC:3606]	37315	-0.85623	-0.506812	Yes
row_138	S100A4	S100 calcium binding protein A4 [Source:HGNC Symbol;Acc:HGNC:10494]	37337	-0.859258	-0.502645	Yes
row_139	PIM1	Pim-1 proto-oncogene, serine/threonine kinase [Source:HGNC Symbol;Acc:HGNC:8986]	37516	-0.874274	-0.502314	Yes
row_140	ISG20	interferon stimulated exonuclease gene 20 [Source:HGNC Symbol;Acc:HGNC:6130]	37518	-0.874815	-0.497562	Yes
row_141	STBD1	starch binding domain 1 [Source:HGNC Symbol;Acc:HGNC:24854]	37564	-0.885271	-0.493851	Yes
row_142	RBPJ	recombination signal binding protein for immunoglobulin kappa J region [Source:HGNC Symbol;Acc:HGNC:5724]	37625	-0.898772	-0.490441	Yes
row_143	ETS1	ETS proto-oncogene 1, transcription factor [Source:HGNC Symbol;Acc:HGNC:3488]	37703	-0.914914	-0.487368	Yes
row_144	NEDD4L	NEDD4 like E3 ubiquitin protein ligase [Source:HGNC Symbol;Acc:HGNC:7728]	37732	-0.922019	-0.483032	Yes
row_145	PPFIA4	PTPRF interacting protein alpha 4 [Source:HGNC Symbol;Acc:HGNC:9248]	37898	-0.965123	-0.481881	Yes
row_146	HDLBP	high density lipoprotein binding protein [Source:HGNC Symbol;Acc:HGNC:4857]	37949	-0.978944	-0.477783	Yes
row_147	CCNG2	cyclin G2 [Source:HGNC Symbol;Acc:HGNC:1593]	37956	-0.980874	-0.472577	Yes
row_148	GYS1	glycogen synthase 1 [Source:HGNC Symbol;Acc:HGNC:4706]	38026	-0.995584	-0.468863	Yes
row_149	SLC2A1	solute carrier family 2 member 1 [Source:HGNC Symbol;Acc:HGNC:11005]	38171	-1.04506	-0.466751	Yes
row_150	TGFB3	transforming growth factor beta 3 [Source:HGNC Symbol;Acc:HGNC:11769]	38282	-1.09262	-0.463531	Yes
row_151	UGP2	UDP-glucose pyrophosphorylase 2 [Source:HGNC Symbol;Acc:HGNC:12527]	38321	-1.10693	-0.458435	Yes
row_152	STC2	stanniocalcin 2 [Source:HGNC Symbol;Acc:HGNC:11374]	38487	-1.17551	-0.456135	Yes
row_153	CITED2	Cbp/p300 interacting transactivator with Glu/Asp rich carboxy-terminal domain 2 [Source:HGNC Symbol;Acc:HGNC:1987]	38507	-1.1841	-0.450144	Yes
row_154	FOSL2	FOS like 2, AP-1 transcription factor subunit [Source:HGNC Symbol;Acc:HGNC:3798]	38577	-1.2166	-0.445223	Yes
row_155	ACKR3	atypical chemokine receptor 3 [Source:HGNC Symbol;Acc:HGNC:23692]	38603	-1.22938	-0.439134	Yes
row_156	TPST2	tyrosylprotein sulfotransferase 2 [Source:HGNC Symbol;Acc:HGNC:12021]	38632	-1.23908	-0.433067	Yes
row_157	GPI	glucose-6-phosphate isomerase [Source:HGNC Symbol;Acc:HGNC:4458]	38636	-1.2409	-0.426367	Yes
row_158	SCARB1	scavenger receptor class B member 1 [Source:HGNC Symbol;Acc:HGNC:1664]	38651	-1.24942	-0.419894	Yes
row_159	PPP1R3C	protein phosphatase 1 regulatory subunit 3C [Source:HGNC Symbol;Acc:HGNC:9293]	38764	-1.30677	-0.415554	Yes
row_160	PFKP	phosphofructokinase, platelet [Source:HGNC Symbol;Acc:HGNC:8878]	38774	-1.31275	-0.408611	Yes
row_161	MT1E	metallothionein 1E [Source:HGNC Symbol;Acc:HGNC:7397]	38799	-1.32733	-0.401962	Yes
row_162	ALDOA	aldolase, fructose-bisphosphate A [Source:HGNC Symbol;Acc:HGNC:414]	38815	-1.3428	-0.395004	Yes
row_163	NDRG1	N-myc downstream regulated 1 [Source:HGNC Symbol;Acc:HGNC:7679]	38830	-1.35246	-0.387969	Yes
row_164	LOX	lysyl oxidase [Source:HGNC Symbol;Acc:HGNC:6664]	38833	-1.35454	-0.380623	Yes
row_165	PLAUR	plasminogen activator, urokinase receptor [Source:HGNC Symbol;Acc:HGNC:9053]	38887	-1.37466	-0.37444	Yes
row_166	HK1	hexokinase 1 [Source:HGNC Symbol;Acc:HGNC:4922]	38902	-1.3835	-0.367235	Yes
row_167	SLC2A3	solute carrier family 2 member 3 [Source:HGNC Symbol;Acc:HGNC:11007]	38976	-1.43185	-0.361239	Yes
row_168	PDK1	pyruvate dehydrogenase kinase 1 [Source:HGNC Symbol;Acc:HGNC:8809]	38992	-1.44465	-0.353725	Yes
row_169	GCNT2	glucosaminyl (N-acetyl) transferase 2 (I blood group) [Source:HGNC Symbol;Acc:HGNC:4204]	39038	-1.47111	-0.346815	Yes
row_170	DDIT4	DNA damage inducible transcript 4 [Source:HGNC Symbol;Acc:HGNC:24944]	39111	-1.52841	-0.340267	Yes
row_171	TPD52	tumor protein D52 [Source:HGNC Symbol;Acc:HGNC:12005]	39152	-1.55282	-0.332787	Yes
row_172	ENO2	enolase 2 [Source:HGNC Symbol;Acc:HGNC:3353]	39155	-1.55521	-0.324345	Yes
row_173	GPC4	glypican 4 [Source:HGNC Symbol;Acc:HGNC:4452]	39158	-1.55718	-0.315892	Yes
row_174	HK2	hexokinase 2 [Source:HGNC Symbol;Acc:HGNC:4923]	39190	-1.57985	-0.308039	Yes
row_175	SDC2	syndecan 2 [Source:HGNC Symbol;Acc:HGNC:10659]	39206	-1.59017	-0.299731	Yes
row_176	CDKN1A	cyclin dependent kinase inhibitor 1A [Source:HGNC Symbol;Acc:HGNC:1784]	39247	-1.62521	-0.291855	Yes
row_177	CCN2	cellular communication network factor 2 [Source:HGNC Symbol;Acc:HGNC:2500]	39271	-1.65016	-0.283419	Yes
row_178	LARGE1	LARGE xylosyl- and glucuronyltransferase 1 [Source:HGNC Symbol;Acc:HGNC:6511]	39273	-1.65211	-0.274423	Yes
row_179	VEGFA	vascular endothelial growth factor A [Source:HGNC Symbol;Acc:HGNC:12680]	39331	-1.70429	-0.26654	Yes
row_180	SDC4	syndecan 4 [Source:HGNC Symbol;Acc:HGNC:10661]	39340	-1.71084	-0.257398	Yes
row_181	KLF6	Kruppel like factor 6 [Source:HGNC Symbol;Acc:HGNC:2235]	39385	-1.73915	-0.249	Yes
row_182	WSB1	WD repeat and SOCS box containing 1 [Source:HGNC Symbol;Acc:HGNC:19221]	39393	-1.7464	-0.239639	Yes
row_183	TGM2	transglutaminase 2 [Source:HGNC Symbol;Acc:HGNC:11778]	39399	-1.75172	-0.230199	Yes
row_184	MYH9	myosin heavy chain 9 [Source:HGNC Symbol;Acc:HGNC:7579]	39412	-1.76478	-0.220862	Yes
row_185	ERRFI1	ERBB receptor feedback inhibitor 1 [Source:HGNC Symbol;Acc:HGNC:18185]	39463	-1.82108	-0.212166	Yes
row_186	ENO1	enolase 1 [Source:HGNC Symbol;Acc:HGNC:3350]	39543	-1.91359	-0.203689	Yes
row_187	BCL2	BCL2 apoptosis regulator [Source:HGNC Symbol;Acc:HGNC:990]	39567	-1.94281	-0.193655	Yes
row_188	CCN1	cellular communication network factor 1 [Source:HGNC Symbol;Acc:HGNC:2654]	39659	-2.07653	-0.184588	Yes
row_189	KLF7	Kruppel like factor 7 [Source:HGNC Symbol;Acc:HGNC:6350]	39759	-2.26399	-0.174697	Yes
row_190	AKAP12	A-kinase anchoring protein 12 [Source:HGNC Symbol;Acc:HGNC:370]	39760	-2.26502	-0.16233	Yes
row_191	PDK3	pyruvate dehydrogenase kinase 3 [Source:HGNC Symbol;Acc:HGNC:8811]	39843	-2.4385	-0.151061	Yes
row_192	HS3ST1	heparan sulfate-glucosamine 3-sulfotransferase 1 [Source:HGNC Symbol;Acc:HGNC:5194]	39864	-2.50353	-0.137891	Yes
row_193	VLDLR	very low density lipoprotein receptor [Source:HGNC Symbol;Acc:HGNC:12698]	40003	-2.92206	-0.12538	Yes
row_194	SLC2A5	solute carrier family 2 member 5 [Source:HGNC Symbol;Acc:HGNC:11010]	40008	-2.94548	-0.109397	Yes
row_195	PDGFB	platelet derived growth factor subunit B [Source:HGNC Symbol;Acc:HGNC:8800]	40116	-3.5141	-0.0928792	Yes
row_196	SELENBP1	selenium binding protein 1 [Source:HGNC Symbol;Acc:HGNC:10719]	40177	-4.02745	-0.0723858	Yes
row_197	PPARGC1A	PPARG coactivator 1 alpha [Source:HGNC Symbol;Acc:HGNC:9237]	40195	-4.24282	-0.0496431	Yes
row_198	CP	ceruloplasmin [Source:HGNC Symbol;Acc:HGNC:2295]	40235	-4.63509	-0.0253077	Yes
row_199	TKTL1	transketolase like 1 [Source:HGNC Symbol;Acc:HGNC:11835]	40249	-4.75831	0.000349543	Yes

## Sheet: Estrogen_Response_Late
SYMBOL	TITLE	RANK IN GENE LIST	RANK METRIC SCORE	RUNNING ES	CORE ENRICHMENT
CXCL14	C-X-C motif chemokine ligand 14 [Source:HGNC Symbol;Acc:HGNC:10640]	4	4.27602	0.0249295	No
KLF4	Kruppel like factor 4 [Source:HGNC Symbol;Acc:HGNC:6348]	140	2.5211	0.0362446	No
ID2	inhibitor of DNA binding 2 [Source:HGNC Symbol;Acc:HGNC:5361]	148	2.4895	0.0506394	No
NRIP1	nuclear receptor interacting protein 1 [Source:HGNC Symbol;Acc:HGNC:8001]	677	1.48106	0.0458424	No
MAPK13	mitogen-activated protein kinase 13 [Source:HGNC Symbol;Acc:HGNC:6875]	1019	1.26329	0.0445402	No
SOX3	SRY-box transcription factor 3 [Source:HGNC Symbol;Acc:HGNC:11199]	1034	1.2563	0.0515374	No
ALDH3A2	aldehyde dehydrogenase 3 family member A2 [Source:HGNC Symbol;Acc:HGNC:403]	1181	1.18393	0.0547443	No
LSR	lipolysis stimulated lipoprotein receptor [Source:HGNC Symbol;Acc:HGNC:29572]	1342	1.1213	0.0572273	No
KRT13	keratin 13 [Source:HGNC Symbol;Acc:HGNC:6415]	1397	1.0986	0.0622811	No
PDZK1	PDZ domain containing 1 [Source:HGNC Symbol;Acc:HGNC:8821]	1643	1.00759	0.0619306	No
S100A9	S100 calcium binding protein A9 [Source:HGNC Symbol;Acc:HGNC:10499]	1676	0.997515	0.0669538	No
ADD3	adducin 3 [Source:HGNC Symbol;Acc:HGNC:245]	1969	0.913357	0.0648529	No
PTGER3	prostaglandin E receptor 3 [Source:HGNC Symbol;Acc:HGNC:9595]	2119	0.887198	0.0662461	No
OVOL2	ovo like zinc finger 2 [Source:HGNC Symbol;Acc:HGNC:15804]	2259	0.8744	0.0678195	No
DUSP2	dual specificity phosphatase 2 [Source:HGNC Symbol;Acc:HGNC:3068]	2361	0.861656	0.0702875	No
TPBG	trophoblast glycoprotein [Source:HGNC Symbol;Acc:HGNC:12004]	2395	0.854101	0.0744457	No
CXCL12	C-X-C motif chemokine ligand 12 [Source:HGNC Symbol;Acc:HGNC:10672]	2578	0.817677	0.0745903	No
PTPN6	protein tyrosine phosphatase non-receptor type 6 [Source:HGNC Symbol;Acc:HGNC:9658]	3042	0.750528	0.0671747	No
KRT19	keratin 19 [Source:HGNC Symbol;Acc:HGNC:6436]	3189	0.728046	0.0677128	No
RPS6KA2	ribosomal protein S6 kinase A2 [Source:HGNC Symbol;Acc:HGNC:10431]	3376	0.69808	0.0670552	No
DHCR7	7-dehydrocholesterol reductase [Source:HGNC Symbol;Acc:HGNC:2860]	3703	0.649681	0.0625436	No
MDK	midkine [Source:HGNC Symbol;Acc:HGNC:6972]	3734	0.645738	0.0655585	No
NCOR2	nuclear receptor corepressor 2 [Source:HGNC Symbol;Acc:HGNC:7673]	3814	0.636568	0.06727	No
CHST8	carbohydrate sulfotransferase 8 [Source:HGNC Symbol;Acc:HGNC:15993]	3996	0.62982	0.0663404	No
AREG	amphiregulin [Source:HGNC Symbol;Acc:HGNC:651]	4070	0.62982	0.0681654	No
GPER1	G protein-coupled estrogen receptor 1 [Source:HGNC Symbol;Acc:HGNC:4485]	4146	0.618673	0.0698741	No
PLXNB1	plexin B1 [Source:HGNC Symbol;Acc:HGNC:9103]	4292	0.606256	0.0697248	No
HOMER2	homer scaffold protein 2 [Source:HGNC Symbol;Acc:HGNC:17513]	4350	0.599442	0.0717801	No
MEST	mesoderm specific transcript [Source:HGNC Symbol;Acc:HGNC:7028]	4540	0.576175	0.0703324	No
GJB3	gap junction protein beta 3 [Source:HGNC Symbol;Acc:HGNC:4285]	4561	0.573088	0.0731771	No
XRCC3	X-ray repair cross complementing 3 [Source:HGNC Symbol;Acc:HGNC:12830]	4739	0.550351	0.0718843	No
RAB31	RAB31, member RAS oncogene family [Source:HGNC Symbol;Acc:HGNC:9771]	4819	0.540473	0.0730332	No
ABHD2	abhydrolase domain containing 2, acylglycerol lipase [Source:HGNC Symbol;Acc:HGNC:18717]	4850	0.53689	0.075411	No
WFS1	wolframin ER transmembrane glycoprotein [Source:HGNC Symbol;Acc:HGNC:12762]	4982	0.525193	0.0751442	No
METTL3	methyltransferase like 3 [Source:HGNC Symbol;Acc:HGNC:17563]	5087	0.516674	0.0755162	No
PDCD4	programmed cell death 4 [Source:HGNC Symbol;Acc:HGNC:8763]	5337	0.495179	0.072064	No
TOB1	transducer of ERBB2, 1 [Source:HGNC Symbol;Acc:HGNC:11979]	5929	0.447488	0.0596097	No
GAL	galanin and GMAP prepropeptide [Source:HGNC Symbol;Acc:HGNC:4114]	5961	0.446445	0.0614325	No
TFPI2	tissue factor pathway inhibitor 2 [Source:HGNC Symbol;Acc:HGNC:11761]	6609	0.433363	0.0474672	No
CALCR	calcitonin receptor [Source:HGNC Symbol;Acc:HGNC:1440]	7554	0.384177	0.0256388	No
PAPSS2	3'-phosphoadenosine 5'-phosphosulfate synthase 2 [Source:HGNC Symbol;Acc:HGNC:8604]	8078	0.342423	0.0143039	No
BAG1	BAG cochaperone 1 [Source:HGNC Symbol;Acc:HGNC:937]	8100	0.341066	0.0157648	No
TST	thiosulfate sulfurtransferase [Source:HGNC Symbol;Acc:HGNC:12388]	8701	0.294823	0.00218733	No
NPY1R	neuropeptide Y receptor Y1 [Source:HGNC Symbol;Acc:HGNC:7956]	8794	0.288071	0.00152716	No
PCP4	Purkinje cell protein 4 [Source:HGNC Symbol;Acc:HGNC:8742]	9935	0.274586	-0.0259419	No
CACNA2D2	calcium voltage-gated channel auxiliary subunit alpha2delta 2 [Source:HGNC Symbol;Acc:HGNC:1400]	10275	0.249835	-0.0331258	No
SLC2A8	solute carrier family 2 member 8 [Source:HGNC Symbol;Acc:HGNC:13812]	10505	0.235511	-0.0375879	No
JAK2	Janus kinase 2 [Source:HGNC Symbol;Acc:HGNC:6192]	11087	0.196435	-0.0512568	No
NAB2	NGFI-A binding protein 2 [Source:HGNC Symbol;Acc:HGNC:7627]	11367	0.177599	-0.0573332	No
ARL3	ADP ribosylation factor like GTPase 3 [Source:HGNC Symbol;Acc:HGNC:694]	11667	0.158842	-0.0640295	No
CCN5	cellular communication network factor 5 [Source:HGNC Symbol;Acc:HGNC:12770]	12104	0.132501	-0.0743743	No
SFN	stratifin [Source:HGNC Symbol;Acc:HGNC:10773]	12437	0.112863	-0.0821815	No
PLAC1	placenta enriched 1 [Source:HGNC Symbol;Acc:HGNC:9044]	12509	0.108662	-0.0833563	No
IGSF1	immunoglobulin superfamily member 1 [Source:HGNC Symbol;Acc:HGNC:5948]	12527	0.107544	-0.0831604	No
AFF1	AF4/FMR2 family member 1 [Source:HGNC Symbol;Acc:HGNC:7135]	12586	0.103629	-0.0840331	No
CPE	carboxypeptidase E [Source:HGNC Symbol;Acc:HGNC:2303]	12620	0.102637	-0.0842739	No
TNNC1	troponin C1, slow skeletal and cardiac type [Source:HGNC Symbol;Acc:HGNC:11943]	13165	0.074034	-0.0977156	No
PLAAT3	phospholipase A and acyltransferase 3 [Source:HGNC Symbol;Acc:HGNC:17825]	13232	0.07007	-0.0989888	No
JAK1	Janus kinase 1 [Source:HGNC Symbol;Acc:HGNC:6190]	13840	0.0329825	-0.114278	No
KLK11	kallikrein related peptidase 11 [Source:HGNC Symbol;Acc:HGNC:6359]	16343	0	-0.178093	No
SLC27A2	solute carrier family 27 member 2 [Source:HGNC Symbol;Acc:HGNC:10996]	16611	0	-0.184903	No
TH	tyrosine hydroxylase [Source:HGNC Symbol;Acc:HGNC:11782]	18725	0	-0.238796	No
LTF	lactotransferrin [Source:HGNC Symbol;Acc:HGNC:6720]	20251	0	-0.277692	No
PGR	progesterone receptor [Source:HGNC Symbol;Acc:HGNC:8910]	20973	0	-0.296082	No
HMGCS2	3-hydroxy-3-methylglutaryl-CoA synthase 2 [Source:HGNC Symbol;Acc:HGNC:5008]	20989	0	-0.296465	No
TPSAB1	tryptase alpha/beta 1 [Source:HGNC Symbol;Acc:HGNC:12019]	24192	0	-0.378134	No
BATF	basic leucine zipper ATF-like transcription factor [Source:HGNC Symbol;Acc:HGNC:958]	26689	0	-0.441796	No
MAPT	microtubule associated protein tau [Source:HGNC Symbol;Acc:HGNC:6893]	27098	-0.0213079	-0.452077	No
RABEP1	rabaptin, RAB GTPase binding effector protein 1 [Source:HGNC Symbol;Acc:HGNC:17677]	27548	-0.0456934	-0.463262	No
SLC24A3	solute carrier family 24 member 3 [Source:HGNC Symbol;Acc:HGNC:10977]	27712	-0.0550305	-0.467097	No
PRKAR2B	protein kinase cAMP-dependent type II regulatory subunit beta [Source:HGNC Symbol;Acc:HGNC:9392]	27910	-0.0650268	-0.471741	No
IMPA2	inositol monophosphatase 2 [Source:HGNC Symbol;Acc:HGNC:6051]	28168	-0.0768989	-0.477846	No
SCUBE2	signal peptide, CUB domain and EGF like domain containing 2 [Source:HGNC Symbol;Acc:HGNC:30425]	28329	-0.0864237	-0.481421	No
SLC9A3R1	SLC9A3 regulator 1 [Source:HGNC Symbol;Acc:HGNC:11075]	28444	-0.0914605	-0.483793	No
LAMC2	laminin subunit gamma 2 [Source:HGNC Symbol;Acc:HGNC:6493]	28463	-0.0927006	-0.483709	No
FRK	fyn related Src family tyrosine kinase [Source:HGNC Symbol;Acc:HGNC:3955]	28875	-0.115676	-0.493515	No
COX6C	cytochrome c oxidase subunit 6C [Source:HGNC Symbol;Acc:HGNC:2285]	29042	-0.124569	-0.49702	No
NBL1	NBL1, DAN family BMP antagonist [Source:HGNC Symbol;Acc:HGNC:7650]	29189	-0.133609	-0.499962	No
GFUS	GDP-L-fucose synthase [Source:HGNC Symbol;Acc:HGNC:12390]	29773	-0.169355	-0.51384	No
FKBP4	FKBP prolyl isomerase 4 [Source:HGNC Symbol;Acc:HGNC:3720]	29797	-0.170754	-0.513427	No
CLIC3	chloride intracellular channel 3 [Source:HGNC Symbol;Acc:HGNC:2064]	30420	-0.207468	-0.528077	No
FARP1	FERM, ARH/RhoGEF and pleckstrin domain protein 1 [Source:HGNC Symbol;Acc:HGNC:3591]	30679	-0.224882	-0.533341	No
RAPGEFL1	Rap guanine nucleotide exchange factor like 1 [Source:HGNC Symbol;Acc:HGNC:17428]	30803	-0.234113	-0.535108	No
GLA	galactosidase alpha [Source:HGNC Symbol;Acc:HGNC:4296]	30834	-0.236712	-0.534487	No
AMFR	autocrine motility factor receptor [Source:HGNC Symbol;Acc:HGNC:463]	31215	-0.251616	-0.542706	No
FABP5	fatty acid binding protein 5 [Source:HGNC Symbol;Acc:HGNC:3560]	31274	-0.255197	-0.542692	No
TIAM1	TIAM Rac1 associated GEF 1 [Source:HGNC Symbol;Acc:HGNC:11805]	31293	-0.256863	-0.541647	No
FAM102A	family with sequence similarity 102 member A [Source:HGNC Symbol;Acc:HGNC:31419]	31496	-0.269272	-0.545223	No
UGDH	UDP-glucose 6-dehydrogenase [Source:HGNC Symbol;Acc:HGNC:12525]	31728	-0.287542	-0.549432	No
MOCS2	molybdenum cofactor synthesis 2 [Source:HGNC Symbol;Acc:HGNC:7193]	31890	-0.300875	-0.551777	No
LLGL2	LLGL scribble cell polarity complex component 2 [Source:HGNC Symbol;Acc:HGNC:6629]	32028	-0.312991	-0.553439	No
ETFB	electron transfer flavoprotein subunit beta [Source:HGNC Symbol;Acc:HGNC:3482]	32095	-0.31806	-0.55326	No
BCL2	BCL2 apoptosis regulator [Source:HGNC Symbol;Acc:HGNC:990]	32179	-0.324181	-0.55348	No
CD44	CD44 molecule (Indian blood group) [Source:HGNC Symbol;Acc:HGNC:1681]	32183	-0.324393	-0.551657	No
GALE	UDP-galactose-4-epimerase [Source:HGNC Symbol;Acc:HGNC:4116]	32392	-0.341685	-0.554962	No
OPN3	opsin 3 [Source:HGNC Symbol;Acc:HGNC:14007]	32471	-0.349924	-0.554903	No
NXT1	nuclear transport factor 2 like export factor 1 [Source:HGNC Symbol;Acc:HGNC:15913]	32500	-0.352179	-0.553556	No
KCNK5	potassium two pore domain channel subfamily K member 5 [Source:HGNC Symbol;Acc:HGNC:6280]	32501	-0.352193	-0.551494	No
OLFM1	olfactomedin 1 [Source:HGNC Symbol;Acc:HGNC:17187]	32772	-0.366894	-0.556233	No
SLC22A5	solute carrier family 22 member 5 [Source:HGNC Symbol;Acc:HGNC:10969]	32785	-0.368041	-0.554384	No
ANXA9	annexin A9 [Source:HGNC Symbol;Acc:HGNC:547]	32846	-0.374222	-0.553724	No
CISH	cytokine inducible SH2 containing protein [Source:HGNC Symbol;Acc:HGNC:1984]	32897	-0.378872	-0.552781	No
DNAJC12	DnaJ heat shock protein family (Hsp40) member C12 [Source:HGNC Symbol;Acc:HGNC:28908]	32909	-0.379958	-0.550838	No
PPIF	peptidylprolyl isomerase F [Source:HGNC Symbol;Acc:HGNC:9259]	32950	-0.383699	-0.549612	No
RNASEH2A	ribonuclease H2 subunit A [Source:HGNC Symbol;Acc:HGNC:18518]	33025	-0.387705	-0.54923	No
SLC26A2	solute carrier family 26 member 2 [Source:HGNC Symbol;Acc:HGNC:10994]	33230	-0.400216	-0.55209	No
DCXR	dicarbonyl and L-xylulose reductase [Source:HGNC Symbol;Acc:HGNC:18985]	33681	-0.412833	-0.561151	No
HPRT1	hypoxanthine phosphoribosyltransferase 1 [Source:HGNC Symbol;Acc:HGNC:5157]	33710	-0.415356	-0.559433	No
LARGE1	LARGE xylosyl- and glucuronyltransferase 1 [Source:HGNC Symbol;Acc:HGNC:6511]	33745	-0.418439	-0.557851	No
TJP3	tight junction protein 3 [Source:HGNC Symbol;Acc:HGNC:11829]	33781	-0.420856	-0.55628	No
ST14	ST14 transmembrane serine protease matriptase [Source:HGNC Symbol;Acc:HGNC:11344]	34190	-0.462639	-0.563978	No
TFF3	trefoil factor 3 [Source:HGNC Symbol;Acc:HGNC:11757]	34270	-0.464786	-0.563272	No
PERP	p53 apoptosis effector related to PMP22 [Source:HGNC Symbol;Acc:HGNC:17637]	34326	-0.464786	-0.561954	No
ASCL1	achaete-scute family bHLH transcription factor 1 [Source:HGNC Symbol;Acc:HGNC:738]	34409	-0.464786	-0.561325	No
DHRS2	dehydrogenase/reductase 2 [Source:HGNC Symbol;Acc:HGNC:18349]	34485	-0.465633	-0.560512	No
TFF1	trefoil factor 1 [Source:HGNC Symbol;Acc:HGNC:11755]	34789	-0.484889	-0.565402	No
DYNLT3	dynein light chain Tctex-type 3 [Source:HGNC Symbol;Acc:HGNC:11694]	35039	-0.495715	-0.568851	No
UNC13B	unc-13 homolog B [Source:HGNC Symbol;Acc:HGNC:12566]	35279	-0.520188	-0.571901	No
FOXC1	forkhead box C1 [Source:HGNC Symbol;Acc:HGNC:3800]	35589	-0.556452	-0.576525	No
FKBP5	FKBP prolyl isomerase 5 [Source:HGNC Symbol;Acc:HGNC:3721]	35790	-0.586609	-0.578192	Yes
KLK10	kallikrein related peptidase 10 [Source:HGNC Symbol;Acc:HGNC:6358]	35849	-0.597727	-0.576173	Yes
ISG20	interferon stimulated exonuclease gene 20 [Source:HGNC Symbol;Acc:HGNC:6130]	36030	-0.627404	-0.577091	Yes
XBP1	X-box binding protein 1 [Source:HGNC Symbol;Acc:HGNC:12801]	36048	-0.629609	-0.573839	Yes
ATP2B4	ATPase plasma membrane Ca2+ transporting 4 [Source:HGNC Symbol;Acc:HGNC:817]	36049	-0.62962	-0.570153	Yes
RET	ret proto-oncogene [Source:HGNC Symbol;Acc:HGNC:9967]	36272	-0.670433	-0.571891	Yes
TPD52L1	TPD52 like 1 [Source:HGNC Symbol;Acc:HGNC:12006]	36325	-0.680952	-0.569231	Yes
CYP26B1	cytochrome P450 family 26 subfamily B member 1 [Source:HGNC Symbol;Acc:HGNC:20581]	36410	-0.698114	-0.567287	Yes
PKP3	plakophilin 3 [Source:HGNC Symbol;Acc:HGNC:9025]	36469	-0.706186	-0.564632	Yes
ABCA3	ATP binding cassette subfamily A member 3 [Source:HGNC Symbol;Acc:HGNC:33]	36704	-0.747386	-0.566225	Yes
PRSS23	serine protease 23 [Source:HGNC Symbol;Acc:HGNC:14370]	36733	-0.754986	-0.56252	Yes
SIAH2	siah E3 ubiquitin protein ligase 2 [Source:HGNC Symbol;Acc:HGNC:10858]	36872	-0.790858	-0.56141	Yes
DLG5	discs large MAGUK scaffold protein 5 [Source:HGNC Symbol;Acc:HGNC:2904]	37111	-0.836046	-0.562586	Yes
SLC29A1	solute carrier family 29 member 1 (Augustine blood group) [Source:HGNC Symbol;Acc:HGNC:11003]	37137	-0.841956	-0.558295	Yes
IL6ST	interleukin 6 signal transducer [Source:HGNC Symbol;Acc:HGNC:6021]	37224	-0.865201	-0.555424	Yes
SORD	sorbitol dehydrogenase [Source:HGNC Symbol;Acc:HGNC:11184]	37243	-0.869208	-0.550794	Yes
CA2	carbonic anhydrase 2 [Source:HGNC Symbol;Acc:HGNC:1373]	37265	-0.874931	-0.546208	Yes
ELOVL5	ELOVL fatty acid elongase 5 [Source:HGNC Symbol;Acc:HGNC:21308]	37278	-0.878399	-0.541372	Yes
FOS	Fos proto-oncogene, AP-1 transcription factor subunit [Source:HGNC Symbol;Acc:HGNC:3796]	37304	-0.887981	-0.536812	Yes
CKB	creatine kinase B [Source:HGNC Symbol;Acc:HGNC:1991]	37484	-0.941616	-0.535865	Yes
SNX10	sorting nexin 10 [Source:HGNC Symbol;Acc:HGNC:14974]	37587	-0.972069	-0.532776	Yes
SERPINA1	serpin family A member 1 [Source:HGNC Symbol;Acc:HGNC:8941]	37603	-0.979478	-0.527425	Yes
BTG3	BTG anti-proliferation factor 3 [Source:HGNC Symbol;Acc:HGNC:1132]	37657	-1.00241	-0.522909	Yes
HSPA4L	heat shock protein family A (Hsp70) member 4 like [Source:HGNC Symbol;Acc:HGNC:17041]	37679	-1.01387	-0.517509	Yes
MYOF	myoferlin [Source:HGNC Symbol;Acc:HGNC:3656]	37680	-1.01408	-0.511573	Yes
CYP4F11	cytochrome P450 family 4 subfamily F member 11 [Source:HGNC Symbol;Acc:HGNC:13265]	37689	-1.01629	-0.505828	Yes
FDFT1	farnesyl-diphosphate farnesyltransferase 1 [Source:HGNC Symbol;Acc:HGNC:3629]	37695	-1.01819	-0.499995	Yes
TSPAN13	tetraspanin 13 [Source:HGNC Symbol;Acc:HGNC:21643]	37762	-1.04539	-0.495559	Yes
ITPK1	inositol-tetrakisphosphate 1-kinase [Source:HGNC Symbol;Acc:HGNC:6177]	37848	-1.07567	-0.49143	Yes
HSPB8	heat shock protein family B (small) member 8 [Source:HGNC Symbol;Acc:HGNC:30171]	37849	-1.0761	-0.48513	Yes
SULT2B1	sulfotransferase family 2B member 1 [Source:HGNC Symbol;Acc:HGNC:11459]	37882	-1.09249	-0.479551	Yes
CHPT1	choline phosphotransferase 1 [Source:HGNC Symbol;Acc:HGNC:17852]	37913	-1.1051	-0.473847	Yes
ALDH3B1	aldehyde dehydrogenase 3 family member B1 [Source:HGNC Symbol;Acc:HGNC:410]	37921	-1.10845	-0.467537	Yes
RBBP8	RB binding protein 8, endonuclease [Source:HGNC Symbol;Acc:HGNC:9891]	37942	-1.11583	-0.461515	Yes
BLVRB	biliverdin reductase B [Source:HGNC Symbol;Acc:HGNC:1063]	37963	-1.12527	-0.455438	Yes
SCARB1	scavenger receptor class B member 1 [Source:HGNC Symbol;Acc:HGNC:1664]	37978	-1.133	-0.449162	Yes
ST6GALNAC2	ST6 N-acetylgalactosaminide alpha-2,6-sialyltransferase 2 [Source:HGNC Symbol;Acc:HGNC:10867]	37999	-1.14327	-0.44298	Yes
SGK1	serum/glucocorticoid regulated kinase 1 [Source:HGNC Symbol;Acc:HGNC:10810]	38236	-1.26544	-0.441591	Yes
EGR3	early growth response 3 [Source:HGNC Symbol;Acc:HGNC:3240]	38246	-1.27753	-0.434342	Yes
PRLR	prolactin receptor [Source:HGNC Symbol;Acc:HGNC:9446]	38284	-1.29744	-0.427691	Yes
IDH2	isocitrate dehydrogenase (NADP(+)) 2 [Source:HGNC Symbol;Acc:HGNC:5383]	38367	-1.34795	-0.421892	Yes
TMPRSS3	transmembrane serine protease 3 [Source:HGNC Symbol;Acc:HGNC:11877]	38428	-1.40178	-0.415216	Yes
HR	HR lysine demethylase and nuclear receptor corepressor [Source:HGNC Symbol;Acc:HGNC:5172]	38439	-1.41076	-0.407213	Yes
TFAP2C	transcription factor AP-2 gamma [Source:HGNC Symbol;Acc:HGNC:11744]	38450	-1.42116	-0.399148	Yes
IL17RB	interleukin 17 receptor B [Source:HGNC Symbol;Acc:HGNC:18015]	38457	-1.43025	-0.390929	Yes
CCND1	cyclin D1 [Source:HGNC Symbol;Acc:HGNC:1582]	38482	-1.45099	-0.383047	Yes
SLC16A1	solute carrier family 16 member 1 [Source:HGNC Symbol;Acc:HGNC:10922]	38489	-1.45515	-0.374682	Yes
MYB	MYB proto-oncogene, transcription factor [Source:HGNC Symbol;Acc:HGNC:7545]	38524	-1.4843	-0.36686	Yes
CELSR2	cadherin EGF LAG seven-pass G-type receptor 2 [Source:HGNC Symbol;Acc:HGNC:3231]	38564	-1.51212	-0.359003	Yes
TRIM29	tripartite motif containing 29 [Source:HGNC Symbol;Acc:HGNC:17274]	38584	-1.5304	-0.350528	Yes
STIL	STIL centriolar assembly protein [Source:HGNC Symbol;Acc:HGNC:10879]	38636	-1.56738	-0.342654	Yes
CDH1	cadherin 1 [Source:HGNC Symbol;Acc:HGNC:1748]	38637	-1.56858	-0.333471	Yes
GINS2	GINS complex subunit 2 [Source:HGNC Symbol;Acc:HGNC:24575]	38638	-1.56878	-0.324288	Yes
PDLIM3	PDZ and LIM domain 3 [Source:HGNC Symbol;Acc:HGNC:20767]	38659	-1.5871	-0.315507	Yes
SCNN1A	sodium channel epithelial 1 subunit alpha [Source:HGNC Symbol;Acc:HGNC:10599]	38691	-1.61886	-0.306821	Yes
ZFP36	ZFP36 ring finger protein [Source:HGNC Symbol;Acc:HGNC:12862]	38704	-1.62917	-0.29759	Yes
FLNB	filamin B [Source:HGNC Symbol;Acc:HGNC:3755]	38730	-1.66651	-0.288472	Yes
CCNA1	cyclin A1 [Source:HGNC Symbol;Acc:HGNC:1577]	38739	-1.67556	-0.278868	Yes
IGFBP4	insulin like growth factor binding protein 4 [Source:HGNC Symbol;Acc:HGNC:5473]	38748	-1.68365	-0.269216	Yes
MICB	MHC class I polypeptide-related sequence B [Source:HGNC Symbol;Acc:HGNC:7091]	38768	-1.70907	-0.259696	Yes
ASS1	argininosuccinate synthase 1 [Source:HGNC Symbol;Acc:HGNC:758]	38815	-1.76994	-0.250508	Yes
DNAJC1	DnaJ heat shock protein family (Hsp40) member C1 [Source:HGNC Symbol;Acc:HGNC:20090]	38838	-1.80987	-0.240474	Yes
CD9	CD9 molecule [Source:HGNC Symbol;Acc:HGNC:1709]	38840	-1.81398	-0.229881	Yes
CAV1	caveolin 1 [Source:HGNC Symbol;Acc:HGNC:1527]	38861	-1.84177	-0.219609	Yes
SEMA3B	semaphorin 3B [Source:HGNC Symbol;Acc:HGNC:10724]	38867	-1.84956	-0.20891	Yes
FGFR3	fibroblast growth factor receptor 3 [Source:HGNC Symbol;Acc:HGNC:3690]	38883	-1.86571	-0.198371	Yes
ACOX2	acyl-CoA oxidase 2 [Source:HGNC Symbol;Acc:HGNC:120]	38897	-1.88705	-0.187655	Yes
CDC20	cell division cycle 20 [Source:HGNC Symbol;Acc:HGNC:1723]	38912	-1.90604	-0.176855	Yes
CA12	carbonic anhydrase 12 [Source:HGNC Symbol;Acc:HGNC:1371]	38941	-1.93774	-0.166225	Yes
PTGES	prostaglandin E synthase [Source:HGNC Symbol;Acc:HGNC:9599]	39023	-2.03529	-0.156377	Yes
EMP2	epithelial membrane protein 2 [Source:HGNC Symbol;Acc:HGNC:3334]	39069	-2.11252	-0.145158	Yes
SLC7A5	solute carrier family 7 member 5 [Source:HGNC Symbol;Acc:HGNC:11063]	39089	-2.13744	-0.13313	Yes
PLK4	polo like kinase 4 [Source:HGNC Symbol;Acc:HGNC:11397]	39152	-2.23891	-0.121605	Yes
KIF20A	kinesin family member 20A [Source:HGNC Symbol;Acc:HGNC:9787]	39161	-2.25883	-0.108586	Yes
NMU	neuromedin U [Source:HGNC Symbol;Acc:HGNC:7859]	39215	-2.37688	-0.0960241	Yes
CDC6	cell division cycle 6 [Source:HGNC Symbol;Acc:HGNC:1744]	39247	-2.45604	-0.0824373	Yes
SERPINA3	serpin family A member 3 [Source:HGNC Symbol;Acc:HGNC:16]	39248	-2.45712	-0.0680535	Yes
TOP2A	DNA topoisomerase II alpha [Source:HGNC Symbol;Acc:HGNC:11989]	39268	-2.52167	-0.0537764	Yes
AGR2	anterior gradient 2, protein disulphide isomerase family member [Source:HGNC Symbol;Acc:HGNC:328]	39309	-2.66573	-0.0391916	Yes
SLC1A4	solute carrier family 1 member 4 [Source:HGNC Symbol;Acc:HGNC:10942]	39376	-3.30746	-0.0215134	Yes
SERPINA5	serpin family A member 5 [Source:HGNC Symbol;Acc:HGNC:8723]	39397	-3.80141	0.000229661	Yes

## Sheet: REACTIVE_Oxygen_Species
NAME	SYMBOL	TITLE	RANK IN GENE LIST	RANK METRIC SCORE	RUNNING ES	CORE ENRICHMENT
row_0	GPX3	glutathione peroxidase 3 [Source:HGNC Symbol;Acc:HGNC:4555]	1315	1.18237	0.00206979	No
row_1	ATOX1	antioxidant 1 copper chaperone [Source:HGNC Symbol;Acc:HGNC:798]	1506	1.09141	0.0294395	No
row_2	G6PD	glucose-6-phosphate dehydrogenase [Source:HGNC Symbol;Acc:HGNC:4057]	2255	0.873634	0.0365298	No
row_3	JUNB	JunB proto-oncogene, AP-1 transcription factor subunit [Source:HGNC Symbol;Acc:HGNC:6205]	3136	0.758267	0.0369452	No
row_4	SBNO2	strawberry notch homolog 2 [Source:HGNC Symbol;Acc:HGNC:29158]	3430	0.706086	0.0504228	No
row_5	GPX4	glutathione peroxidase 4 [Source:HGNC Symbol;Acc:HGNC:4556]	3849	0.639904	0.0588458	No
row_6	GLRX	glutaredoxin [Source:HGNC Symbol;Acc:HGNC:4330]	7387	0.403586	-0.0172385	No
row_7	HMOX2	heme oxygenase 2 [Source:HGNC Symbol;Acc:HGNC:5014]	8950	0.27919	-0.0478698	No
row_8	PTPA	protein phosphatase 2 phosphatase activator [Source:HGNC Symbol;Acc:HGNC:9308]	9242	0.259744	-0.0474678	No
row_9	FTL	ferritin light chain [Source:HGNC Symbol;Acc:HGNC:3999]	9593	0.235868	-0.049235	No
row_10	FES	FES proto-oncogene, tyrosine kinase [Source:HGNC Symbol;Acc:HGNC:3657]	9782	0.220933	-0.047413	No
row_11	ERCC2	ERCC excision repair 2, TFIIH core complex helicase subunit [Source:HGNC Symbol;Acc:HGNC:3434]	12232	0.0680187	-0.106311	No
row_12	GCLM	glutamate-cysteine ligase modifier subunit [Source:HGNC Symbol;Acc:HGNC:4312]	12315	0.0622646	-0.106519	No
row_13	GLRX2	glutaredoxin 2 [Source:HGNC Symbol;Acc:HGNC:16065]	12320	0.061858	-0.104799	No
row_14	LAMTOR5	late endosomal/lysosomal adaptor, MAPK and MTOR activator 5 [Source:HGNC Symbol;Acc:HGNC:17955]	12421	0.0558217	-0.105644	No
row_15	SRXN1	sulfiredoxin 1 [Source:HGNC Symbol;Acc:HGNC:16132]	12435	0.0544387	-0.104367	No
row_16	SELENOS	selenoprotein S [Source:HGNC Symbol;Acc:HGNC:30396]	12976	0.0150514	-0.117352	No
row_17	CDKN2D	cyclin dependent kinase inhibitor 2D [Source:HGNC Symbol;Acc:HGNC:1790]	26853	-0.014663	-0.461966	No
row_18	PRDX1	peroxiredoxin 1 [Source:HGNC Symbol;Acc:HGNC:9352]	27229	-0.0256456	-0.470537	No
row_19	PRDX2	peroxiredoxin 2 [Source:HGNC Symbol;Acc:HGNC:9353]	28438	-0.101587	-0.497588	No
row_20	NDUFS2	NADH:ubiquinone oxidoreductase core subunit S2 [Source:HGNC Symbol;Acc:HGNC:7708]	29475	-0.170854	-0.518325	No
row_21	MPO	myeloperoxidase [Source:HGNC Symbol;Acc:HGNC:7218]	29975	-0.204548	-0.524719	No
row_22	OXSR1	oxidative stress responsive kinase 1 [Source:HGNC Symbol;Acc:HGNC:8508]	30461	-0.235171	-0.529863	No
row_23	NDUFA6	NADH:ubiquinone oxidoreductase subunit A6 [Source:HGNC Symbol;Acc:HGNC:7690]	31717	-0.327687	-0.551435	No
row_24	PDLIM1	PDZ and LIM domain 1 [Source:HGNC Symbol;Acc:HGNC:2067]	32774	-0.426184	-0.565161	No
row_25	TXN	thioredoxin [Source:HGNC Symbol;Acc:HGNC:12435]	34491	-0.489253	-0.593445	Yes
row_26	HHEX	hematopoietically expressed homeobox [Source:HGNC Symbol;Acc:HGNC:4901]	34586	-0.490382	-0.581362	Yes
row_27	GSR	glutathione-disulfide reductase [Source:HGNC Symbol;Acc:HGNC:4623]	34986	-0.508904	-0.576318	Yes
row_28	NDUFB4	NADH:ubiquinone oxidoreductase subunit B4 [Source:HGNC Symbol;Acc:HGNC:7699]	35177	-0.522531	-0.565677	Yes
row_29	EGLN2	egl-9 family hypoxia inducible factor 2 [Source:HGNC Symbol;Acc:HGNC:14660]	35339	-0.536663	-0.553899	Yes
row_30	TXNRD2	thioredoxin reductase 2 [Source:HGNC Symbol;Acc:HGNC:18155]	35435	-0.5496	-0.5401	Yes
row_31	MSRA	methionine sulfoxide reductase A [Source:HGNC Symbol;Acc:HGNC:7377]	35709	-0.592028	-0.529479	Yes
row_32	IPCEF1	interaction protein for cytohesin exchange factors 1 [Source:HGNC Symbol;Acc:HGNC:21204]	36535	-0.730505	-0.528513	Yes
row_33	GCLC	glutamate-cysteine ligase catalytic subunit [Source:HGNC Symbol;Acc:HGNC:4311]	36704	-0.761123	-0.510308	Yes
row_34	SOD1	superoxide dismutase 1 [Source:HGNC Symbol;Acc:HGNC:11179]	36868	-0.791518	-0.491086	Yes
row_35	PRDX6	peroxiredoxin 6 [Source:HGNC Symbol;Acc:HGNC:16753]	37149	-0.84081	-0.473323	Yes
row_36	CAT	catalase [Source:HGNC Symbol;Acc:HGNC:1516]	37329	-0.858093	-0.452541	Yes
row_37	STK25	serine/threonine kinase 25 [Source:HGNC Symbol;Acc:HGNC:11404]	37558	-0.884444	-0.432203	Yes
row_38	SOD2	superoxide dismutase 2 [Source:HGNC Symbol;Acc:HGNC:11180]	37755	-0.927592	-0.409799	Yes
row_39	SCAF4	SR-related CTD associated factor 4 [Source:HGNC Symbol;Acc:HGNC:19304]	37807	-0.942668	-0.383347	Yes
row_40	LSP1	lymphocyte specific protein 1 [Source:HGNC Symbol;Acc:HGNC:6707]	38131	-1.03208	-0.361029	Yes
row_41	TXNRD1	thioredoxin reductase 1 [Source:HGNC Symbol;Acc:HGNC:12437]	38705	-1.27529	-0.337776	Yes
row_42	PFKP	phosphofructokinase, platelet [Source:HGNC Symbol;Acc:HGNC:8878]	38774	-1.31275	-0.300864	Yes
row_43	PRDX4	peroxiredoxin 4 [Source:HGNC Symbol;Acc:HGNC:17169]	38798	-1.32478	-0.262479	Yes
row_44	PRNP	prion protein [Source:HGNC Symbol;Acc:HGNC:9449]	39077	-1.49829	-0.225333	Yes
row_45	NQO1	NAD(P)H quinone dehydrogenase 1 [Source:HGNC Symbol;Acc:HGNC:2874]	39274	-1.6523	-0.181619	Yes
row_46	MGST1	microsomal glutathione S-transferase 1 [Source:HGNC Symbol;Acc:HGNC:7061]	39684	-2.11685	-0.12954	Yes
row_47	MBP	myelin basic protein [Source:HGNC Symbol;Acc:HGNC:6925]	39832	-2.42403	-0.0619142	Yes
row_48	ABCC1	ATP binding cassette subfamily C member 1 [Source:HGNC Symbol;Acc:HGNC:51]	39851	-2.46909	0.0102451	Yes

## Sheet: Glycolysis
NAME	SYMBOL	TITLE	RANK IN GENE LIST	RANK METRIC SCORE	RUNNING ES	CORE ENRICHMENT
row_0	B3GAT1	beta-1,3-glucuronyltransferase 1 [Source:HGNC Symbol;Acc:HGNC:921]	350	2.24318	0.00829193	No
row_1	STC1	stanniocalcin 1 [Source:HGNC Symbol;Acc:HGNC:11373]	414	2.10453	0.0226949	No
row_2	GPC1	glypican 1 [Source:HGNC Symbol;Acc:HGNC:4449]	619	1.72154	0.0306713	No
row_3	IGFBP3	insulin like growth factor binding protein 3 [Source:HGNC Symbol;Acc:HGNC:5472]	1029	1.33851	0.0306233	No
row_4	MERTK	MER proto-oncogene, tyrosine kinase [Source:HGNC Symbol;Acc:HGNC:7027]	1048	1.32759	0.0402518	No
row_5	SOX9	SRY-box transcription factor 9 [Source:HGNC Symbol;Acc:HGNC:11204]	1425	1.1298	0.0394431	No
row_6	LCT	lactase [Source:HGNC Symbol;Acc:HGNC:6530]	1472	1.10812	0.0467067	No
row_7	ANGPTL4	angiopoietin like 4 [Source:HGNC Symbol;Acc:HGNC:16039]	1544	1.07787	0.0531167	No
row_8	G6PD	glucose-6-phosphate dehydrogenase [Source:HGNC Symbol;Acc:HGNC:4057]	2255	0.873634	0.0420268	No
row_9	CTH	cystathionine gamma-lyase [Source:HGNC Symbol;Acc:HGNC:2501]	2418	0.850334	0.0444381	No
row_10	IDUA	alpha-L-iduronidase [Source:HGNC Symbol;Acc:HGNC:5391]	2929	0.793319	0.0377306	No
row_11	COL5A1	collagen type V alpha 1 chain [Source:HGNC Symbol;Acc:HGNC:2209]	2959	0.786745	0.0429789	No
row_12	HOMER1	homer scaffold protein 1 [Source:HGNC Symbol;Acc:HGNC:17512]	3086	0.76636	0.0456514	No
row_13	CHST2	carbohydrate sulfotransferase 2 [Source:HGNC Symbol;Acc:HGNC:1970]	3148	0.75734	0.0498778	No
row_14	FUT8	fucosyltransferase 8 [Source:HGNC Symbol;Acc:HGNC:4019]	3223	0.74386	0.0536774	No
row_15	ARTN	artemin [Source:HGNC Symbol;Acc:HGNC:727]	3402	0.711646	0.0546366	No
row_16	SLC25A10	solute carrier family 25 member 10 [Source:HGNC Symbol;Acc:HGNC:10980]	3630	0.674171	0.0540883	No
row_17	TPST1	tyrosylprotein sulfotransferase 1 [Source:HGNC Symbol;Acc:HGNC:12020]	3720	0.659465	0.0568729	No
row_18	NASP	nuclear autoantigenic sperm protein [Source:HGNC Symbol;Acc:HGNC:7644]	3812	0.645627	0.0595025	No
row_19	CXCR4	C-X-C motif chemokine receptor 4 [Source:HGNC Symbol;Acc:HGNC:2561]	3852	0.639809	0.0633858	No
row_20	CHST12	carbohydrate sulfotransferase 12 [Source:HGNC Symbol;Acc:HGNC:17423]	3860	0.638223	0.0680559	No
row_21	ALG1	ALG1 chitobiosyldiphosphodolichol beta-mannosyltransferase [Source:HGNC Symbol;Acc:HGNC:18294]	3943	0.62732	0.0707711	No
row_22	PSMC4	proteasome 26S subunit, ATPase 4 [Source:HGNC Symbol;Acc:HGNC:9551]	4003	0.618594	0.0739942	No
row_23	PGLS	6-phosphogluconolactonase [Source:HGNC Symbol;Acc:HGNC:8903]	4160	0.59825	0.0746418	No
row_24	HAX1	HCLS1 associated protein X-1 [Source:HGNC Symbol;Acc:HGNC:16915]	4191	0.594372	0.0784048	No
row_25	B4GALT7	beta-1,4-galactosyltransferase 7 [Source:HGNC Symbol;Acc:HGNC:930]	4418	0.566057	0.0770608	No
row_26	KDELR3	KDEL endoplasmic reticulum protein retention receptor 3 [Source:HGNC Symbol;Acc:HGNC:6306]	4519	0.553926	0.0787697	No
row_27	GALK2	galactokinase 2 [Source:HGNC Symbol;Acc:HGNC:4119]	4833	0.520508	0.0749083	No
row_28	PLOD2	procollagen-lysine,2-oxoglutarate 5-dioxygenase 2 [Source:HGNC Symbol;Acc:HGNC:9082]	4894	0.516446	0.0773311	No
row_29	RARS1	arginyl-tRNA synthetase 1 [Source:HGNC Symbol;Acc:HGNC:9870]	5785	0.463164	0.0586325	No
row_30	BIK	BCL2 interacting killer [Source:HGNC Symbol;Acc:HGNC:1051]	6093	0.431007	0.0542415	No
row_31	TFF3	trefoil factor 3 [Source:HGNC Symbol;Acc:HGNC:11757]	6184	0.428955	0.0552513	No
row_32	MIF	macrophage migration inhibitory factor [Source:HGNC Symbol;Acc:HGNC:7097]	6892	0.42082	0.040799	No
row_33	XYLT2	xylosyltransferase 2 [Source:HGNC Symbol;Acc:HGNC:15517]	7296	0.412018	0.0338678	No
row_34	AGL	amylo-alpha-1, 6-glucosidase, 4-alpha-glucanotransferase [Source:HGNC Symbol;Acc:HGNC:321]	7374	0.405032	0.0350204	No
row_35	GLRX	glutaredoxin [Source:HGNC Symbol;Acc:HGNC:4330]	7387	0.403586	0.0377845	No
row_36	GALK1	galactokinase 1 [Source:HGNC Symbol;Acc:HGNC:4118]	7605	0.386171	0.0352996	No
row_37	KIF20A	kinesin family member 20A [Source:HGNC Symbol;Acc:HGNC:9787]	7628	0.384159	0.0376667	No
row_38	HSPA5	heat shock protein family A (Hsp70) member 5 [Source:HGNC Symbol;Acc:HGNC:5238]	7755	0.374294	0.037363	No
row_39	AK4	adenylate kinase 4 [Source:HGNC Symbol;Acc:HGNC:363]	7900	0.361634	0.0365139	No
row_40	LDHA	lactate dehydrogenase A [Source:HGNC Symbol;Acc:HGNC:6535]	8052	0.349486	0.0353979	No
row_41	ECD	ecdysoneless cell cycle regulator [Source:HGNC Symbol;Acc:HGNC:17029]	8479	0.314072	0.027149	No
row_42	BPNT1	3'(2'), 5'-bisphosphate nucleotidase 1 [Source:HGNC Symbol;Acc:HGNC:1096]	8538	0.308818	0.0280456	No
row_43	CAPN5	calpain 5 [Source:HGNC Symbol;Acc:HGNC:1482]	8598	0.304611	0.0288852	No
row_44	HS6ST2	heparan sulfate 6-O-sulfotransferase 2 [Source:HGNC Symbol;Acc:HGNC:19133]	8603	0.304248	0.0310949	No
row_45	CACNA1H	calcium voltage-gated channel subunit alpha1 H [Source:HGNC Symbol;Acc:HGNC:1395]	8805	0.288516	0.0282681	No
row_46	PPP2CB	protein phosphatase 2 catalytic subunit beta [Source:HGNC Symbol;Acc:HGNC:9300]	8953	0.278998	0.0267168	No
row_47	QSOX1	quiescin sulfhydryl oxidase 1 [Source:HGNC Symbol;Acc:HGNC:9756]	9216	0.26135	0.0221612	No
row_48	PGM2	phosphoglucomutase 2 [Source:HGNC Symbol;Acc:HGNC:8906]	9238	0.260152	0.0236118	No
row_49	MDH1	malate dehydrogenase 1 [Source:HGNC Symbol;Acc:HGNC:6970]	9435	0.245952	0.0205867	No
row_50	CHPF2	chondroitin polymerizing factor 2 [Source:HGNC Symbol;Acc:HGNC:29270]	9484	0.242678	0.0212308	No
row_51	PAM	peptidylglycine alpha-amidating monooxygenase [Source:HGNC Symbol;Acc:HGNC:8596]	9516	0.241207	0.022288	No
row_52	B4GALT4	beta-1,4-galactosyltransferase 4 [Source:HGNC Symbol;Acc:HGNC:927]	9525	0.240385	0.0239131	No
row_53	RBCK1	RANBP2-type and C3HC4-type zinc finger containing 1 [Source:HGNC Symbol;Acc:HGNC:15864]	9577	0.236801	0.0244377	No
row_54	P4HA2	prolyl 4-hydroxylase subunit alpha 2 [Source:HGNC Symbol;Acc:HGNC:8547]	9885	0.213337	0.0183944	No
row_55	SRD5A3	steroid 5 alpha-reductase 3 [Source:HGNC Symbol;Acc:HGNC:25812]	10050	0.200292	0.0158214	No
row_56	MED24	mediator complex subunit 24 [Source:HGNC Symbol;Acc:HGNC:22963]	10243	0.189586	0.0124682	No
row_57	EXT2	exostosin glycosyltransferase 2 [Source:HGNC Symbol;Acc:HGNC:3513]	10282	0.187887	0.012946	No
row_58	GLCE	glucuronic acid epimerase [Source:HGNC Symbol;Acc:HGNC:17855]	10421	0.180206	0.0108694	No
row_59	POLR3K	RNA polymerase III subunit K [Source:HGNC Symbol;Acc:HGNC:14121]	10634	0.170334	0.00687089	No
row_60	PFKFB1	6-phosphofructo-2-kinase/fructose-2,6-biphosphatase 1 [Source:HGNC Symbol;Acc:HGNC:8872]	10652	0.169496	0.00773321	No
row_61	ALDH7A1	aldehyde dehydrogenase 7 family member A1 [Source:HGNC Symbol;Acc:HGNC:877]	10855	0.156757	0.00388122	No
row_62	TPBG	trophoblast glycoprotein [Source:HGNC Symbol;Acc:HGNC:12004]	10882	0.154489	0.00440499	No
row_63	MPI	mannose phosphate isomerase [Source:HGNC Symbol;Acc:HGNC:7216]	10938	0.151164	0.00417967	No
row_64	FKBP4	FKBP prolyl isomerase 4 [Source:HGNC Symbol;Acc:HGNC:3720]	10999	0.146916	0.0037973	No
row_65	SPAG4	sperm associated antigen 4 [Source:HGNC Symbol;Acc:HGNC:11214]	11177	0.13564	0.000409016	No
row_66	GMPPB	GDP-mannose pyrophosphorylase B [Source:HGNC Symbol;Acc:HGNC:22932]	11408	0.121532	-0.00440925	No
row_67	COG2	component of oligomeric golgi complex 2 [Source:HGNC Symbol;Acc:HGNC:6546]	11618	0.106295	-0.00881902	No
row_68	PPIA	peptidylprolyl isomerase A [Source:HGNC Symbol;Acc:HGNC:9253]	11803	0.095693	-0.0126853	No
row_69	MXI1	MAX interactor 1, dimerization protein [Source:HGNC Symbol;Acc:HGNC:7534]	11877	0.0916593	-0.0138116	No
row_70	EFNA3	ephrin A3 [Source:HGNC Symbol;Acc:HGNC:3223]	11917	0.0891745	-0.0141081	No
row_71	LHX9	LIM homeobox 9 [Source:HGNC Symbol;Acc:HGNC:14222]	12105	0.0765886	-0.0181942	No
row_72	GNPDA1	glucosamine-6-phosphate deaminase 1 [Source:HGNC Symbol;Acc:HGNC:4417]	12343	0.060325	-0.0236518	No
row_73	AK3	adenylate kinase 3 [Source:HGNC Symbol;Acc:HGNC:17376]	12498	0.0491127	-0.0271229	No
row_74	PYGL	glycogen phosphorylase L [Source:HGNC Symbol;Acc:HGNC:9725]	12662	0.0379157	-0.0309035	No
row_75	ALDOB	aldolase, fructose-bisphosphate B [Source:HGNC Symbol;Acc:HGNC:417]	12841	0.0244034	-0.0351612	No
row_76	AKR1A1	aldo-keto reductase family 1 member A1 [Source:HGNC Symbol;Acc:HGNC:380]	12904	0.0199451	-0.0365573	No
row_77	DCN	decorin [Source:HGNC Symbol;Acc:HGNC:2705]	13578	0	-0.0533554	No
row_78	NDST3	N-deacetylase and N-sulfotransferase 3 [Source:HGNC Symbol;Acc:HGNC:7682]	17494	0	-0.151074	No
row_79	B3GNT3	UDP-GlcNAc:betaGal beta-1,3-N-acetylglucosaminyltransferase 3 [Source:HGNC Symbol;Acc:HGNC:13528]	20788	0	-0.233268	No
row_80	PGAM2	phosphoglycerate mutase 2 [Source:HGNC Symbol;Acc:HGNC:8889]	21239	0	-0.2445	No
row_81	GYS2	glycogen synthase 2 [Source:HGNC Symbol;Acc:HGNC:4707]	21535	0	-0.251863	No
row_82	CLDN3	claudin 3 [Source:HGNC Symbol;Acc:HGNC:2045]	22795	0	-0.283288	No
row_83	GNE	glucosamine (UDP-N-acetyl)-2-epimerase/N-acetylmannosamine kinase [Source:HGNC Symbol;Acc:HGNC:23657]	26477	-0.00241214	-0.375147	No
row_84	B3GAT3	beta-1,3-glucuronyltransferase 3 [Source:HGNC Symbol;Acc:HGNC:923]	26906	-0.0173337	-0.385699	No
row_85	DEPDC1	DEP domain containing 1 [Source:HGNC Symbol;Acc:HGNC:22949]	26993	-0.0182615	-0.387707	No
row_86	FBP2	fructose-bisphosphatase 2 [Source:HGNC Symbol;Acc:HGNC:3607]	27509	-0.038347	-0.40027	No
row_87	CENPA	centromere protein A [Source:HGNC Symbol;Acc:HGNC:1851]	27526	-0.0387021	-0.400375	No
row_88	AGRN	agrin [Source:HGNC Symbol;Acc:HGNC:329]	27731	-0.0480522	-0.405102	No
row_89	CHST6	carbohydrate sulfotransferase 6 [Source:HGNC Symbol;Acc:HGNC:6938]	27959	-0.0646027	-0.410278	No
row_90	SDC1	syndecan 1 [Source:HGNC Symbol;Acc:HGNC:10658]	27991	-0.0673363	-0.410541	No
row_91	SDHC	succinate dehydrogenase complex subunit C [Source:HGNC Symbol;Acc:HGNC:10682]	28006	-0.0686825	-0.410369	No
row_92	TALDO1	transaldolase 1 [Source:HGNC Symbol;Acc:HGNC:11559]	28118	-0.0768858	-0.412556	No
row_93	EGFR	epidermal growth factor receptor [Source:HGNC Symbol;Acc:HGNC:3236]	28173	-0.0815119	-0.413285	No
row_94	PAXIP1	PAX interacting protein 1 [Source:HGNC Symbol;Acc:HGNC:8624]	28197	-0.0834442	-0.413225	No
row_95	B4GALT2	beta-1,4-galactosyltransferase 2 [Source:HGNC Symbol;Acc:HGNC:925]	28577	-0.110993	-0.421843	No
row_96	PRPS1	phosphoribosyl pyrophosphate synthetase 1 [Source:HGNC Symbol;Acc:HGNC:9462]	28734	-0.122418	-0.424807	No
row_97	IL13RA1	interleukin 13 receptor subunit alpha 1 [Source:HGNC Symbol;Acc:HGNC:5974]	28754	-0.123348	-0.424345	No
row_98	COPB2	COPI coat complex subunit beta 2 [Source:HGNC Symbol;Acc:HGNC:2232]	28817	-0.127413	-0.424925	No
row_99	CYB5A	cytochrome b5 type A [Source:HGNC Symbol;Acc:HGNC:2570]	28897	-0.13239	-0.425892	No
row_100	GUSB	glucuronidase beta [Source:HGNC Symbol;Acc:HGNC:4696]	29022	-0.141222	-0.427915	No
row_101	PMM2	phosphomannomutase 2 [Source:HGNC Symbol;Acc:HGNC:9115]	29404	-0.166245	-0.436163	No
row_102	DSC2	desmocollin 2 [Source:HGNC Symbol;Acc:HGNC:3036]	29447	-0.168838	-0.43593	No
row_103	IER3	immediate early response 3 [Source:HGNC Symbol;Acc:HGNC:5392]	29546	-0.176044	-0.43704	No
row_104	P4HA1	prolyl 4-hydroxylase subunit alpha 1 [Source:HGNC Symbol;Acc:HGNC:8546]	29556	-0.176547	-0.435924	No
row_105	MDH2	malate dehydrogenase 2 [Source:HGNC Symbol;Acc:HGNC:6971]	29643	-0.183051	-0.436681	No
row_106	PLOD1	procollagen-lysine,2-oxoglutarate 5-dioxygenase 1 [Source:HGNC Symbol;Acc:HGNC:9081]	29656	-0.183558	-0.435587	No
row_107	HS2ST1	heparan sulfate 2-O-sulfotransferase 1 [Source:HGNC Symbol;Acc:HGNC:5193]	29658	-0.183583	-0.434219	No
row_108	NSDHL	NAD(P) dependent steroid dehydrogenase-like [Source:HGNC Symbol;Acc:HGNC:13398]	29966	-0.20363	-0.440336	No
row_109	SAP30	Sin3A associated protein 30 [Source:HGNC Symbol;Acc:HGNC:10532]	30050	-0.208361	-0.440826	No
row_110	GMPPA	GDP-mannose pyrophosphorylase A [Source:HGNC Symbol;Acc:HGNC:22923]	30162	-0.214851	-0.441965	No
row_111	LHPP	phospholysine phosphohistidine inorganic pyrophosphate phosphatase [Source:HGNC Symbol;Acc:HGNC:30042]	30190	-0.217063	-0.440991	No
row_112	GFPT1	glutamine--fructose-6-phosphate transaminase 1 [Source:HGNC Symbol;Acc:HGNC:4241]	30219	-0.219189	-0.440026	No
row_113	CDK1	cyclin dependent kinase 1 [Source:HGNC Symbol;Acc:HGNC:1722]	30395	-0.231323	-0.442638	No
row_114	PGAM1	phosphoglycerate mutase 1 [Source:HGNC Symbol;Acc:HGNC:8888]	30504	-0.237615	-0.44353	No
row_115	SLC37A4	solute carrier family 37 member 4 [Source:HGNC Symbol;Acc:HGNC:4061]	30552	-0.241399	-0.442871	No
row_116	PKM	pyruvate kinase M1/2 [Source:HGNC Symbol;Acc:HGNC:9021]	30634	-0.247564	-0.443014	No
row_117	TPI1	triosephosphate isomerase 1 [Source:HGNC Symbol;Acc:HGNC:12009]	30691	-0.251694	-0.442501	No
row_118	CASP6	caspase 6 [Source:HGNC Symbol;Acc:HGNC:1507]	30807	-0.260078	-0.443397	No
row_119	CHST4	carbohydrate sulfotransferase 4 [Source:HGNC Symbol;Acc:HGNC:1972]	30955	-0.271986	-0.445001	No
row_120	KIF2A	kinesin family member 2A [Source:HGNC Symbol;Acc:HGNC:6318]	31044	-0.279847	-0.445074	No
row_121	SLC35A3	solute carrier family 35 member A3 [Source:HGNC Symbol;Acc:HGNC:11023]	31289	-0.296813	-0.448911	No
row_122	GOT2	glutamic-oxaloacetic transaminase 2 [Source:HGNC Symbol;Acc:HGNC:4433]	31560	-0.315671	-0.453254	No
row_123	NANP	N-acetylneuraminic acid phosphatase [Source:HGNC Symbol;Acc:HGNC:16140]	31669	-0.324234	-0.453488	No
row_124	MIOX	myo-inositol oxygenase [Source:HGNC Symbol;Acc:HGNC:14522]	31810	-0.335796	-0.454433	No
row_125	NDUFV3	NADH:ubiquinone oxidoreductase subunit V3 [Source:HGNC Symbol;Acc:HGNC:7719]	32213	-0.372052	-0.461643	No
row_126	AURKA	aurora kinase A [Source:HGNC Symbol;Acc:HGNC:11393]	32445	-0.394377	-0.464415	No
row_127	GOT1	glutamic-oxaloacetic transaminase 1 [Source:HGNC Symbol;Acc:HGNC:4432]	32508	-0.402276	-0.462909	No
row_128	CLDN9	claudin 9 [Source:HGNC Symbol;Acc:HGNC:2051]	33458	-0.430323	-0.48333	No
row_129	LDHC	lactate dehydrogenase C [Source:HGNC Symbol;Acc:HGNC:6544]	33810	-0.435529	-0.488784	No
row_130	STMN1	stathmin 1 [Source:HGNC Symbol;Acc:HGNC:6510]	34217	-0.45974	-0.495428	Yes
row_131	DLD	dihydrolipoamide dehydrogenase [Source:HGNC Symbol;Acc:HGNC:2898]	34303	-0.471034	-0.493974	Yes
row_132	ARPP19	cAMP regulated phosphoprotein 19 [Source:HGNC Symbol;Acc:HGNC:16967]	34360	-0.476236	-0.491757	Yes
row_133	GPR87	G protein-coupled receptor 87 [Source:HGNC Symbol;Acc:HGNC:4538]	34371	-0.477003	-0.488386	Yes
row_134	GALE	UDP-galactose-4-epimerase [Source:HGNC Symbol;Acc:HGNC:4116]	34383	-0.478551	-0.485028	Yes
row_135	ALDH9A1	aldehyde dehydrogenase 9 family member A1 [Source:HGNC Symbol;Acc:HGNC:412]	34402	-0.480582	-0.481829	Yes
row_136	DPYSL4	dihydropyrimidinase like 4 [Source:HGNC Symbol;Acc:HGNC:3016]	34416	-0.482181	-0.478493	Yes
row_137	NOL3	nucleolar protein 3 [Source:HGNC Symbol;Acc:HGNC:7869]	34464	-0.486422	-0.475974	Yes
row_138	GFUS	GDP-L-fucose synthase [Source:HGNC Symbol;Acc:HGNC:12390]	34481	-0.488175	-0.472667	Yes
row_139	TXN	thioredoxin [Source:HGNC Symbol;Acc:HGNC:12435]	34491	-0.489253	-0.469178	Yes
row_140	ADORA2B	adenosine A2b receptor [Source:HGNC Symbol;Acc:HGNC:264]	34634	-0.493084	-0.468979	Yes
row_141	TGFBI	transforming growth factor beta induced [Source:HGNC Symbol;Acc:HGNC:11771]	34876	-0.497792	-0.471216	Yes
row_142	B3GALT6	beta-1,3-galactosyltransferase 6 [Source:HGNC Symbol;Acc:HGNC:17978]	34928	-0.503697	-0.468665	Yes
row_143	RRAGD	Ras related GTP binding D [Source:HGNC Symbol;Acc:HGNC:19903]	35211	-0.527229	-0.471702	Yes
row_144	GAPDHS	glyceraldehyde-3-phosphate dehydrogenase, spermatogenic [Source:HGNC Symbol;Acc:HGNC:24864]	35376	-0.541592	-0.471684	Yes
row_145	HMMR	hyaluronan mediated motility receptor [Source:HGNC Symbol;Acc:HGNC:5012]	35726	-0.594903	-0.475879	Yes
row_146	SDC3	syndecan 3 [Source:HGNC Symbol;Acc:HGNC:10660]	35830	-0.608333	-0.473832	Yes
row_147	RPE	ribulose-5-phosphate-3-epimerase [Source:HGNC Symbol;Acc:HGNC:10293]	36254	-0.681337	-0.479218	Yes
row_148	EXT1	exostosin glycosyltransferase 1 [Source:HGNC Symbol;Acc:HGNC:3512]	36291	-0.687055	-0.474901	Yes
row_149	MET	MET proto-oncogene, receptor tyrosine kinase [Source:HGNC Symbol;Acc:HGNC:7029]	36566	-0.73713	-0.476145	Yes
row_150	PYGB	glycogen phosphorylase B [Source:HGNC Symbol;Acc:HGNC:9723]	36581	-0.740173	-0.470876	Yes
row_151	PGK1	phosphoglycerate kinase 1 [Source:HGNC Symbol;Acc:HGNC:8896]	36675	-0.756732	-0.467453	Yes
row_152	GCLC	glutamate-cysteine ligase catalytic subunit [Source:HGNC Symbol;Acc:HGNC:4311]	36704	-0.761123	-0.462374	Yes
row_153	CHST1	carbohydrate sulfotransferase 1 [Source:HGNC Symbol;Acc:HGNC:1969]	36768	-0.770735	-0.458096	Yes
row_154	ANKZF1	ankyrin repeat and zinc finger peptidyl tRNA hydrolase 1 [Source:HGNC Symbol;Acc:HGNC:25527]	36867	-0.791222	-0.454536	Yes
row_155	SOD1	superoxide dismutase 1 [Source:HGNC Symbol;Acc:HGNC:11179]	36868	-0.791518	-0.448527	Yes
row_156	ZNF292	zinc finger protein 292 [Source:HGNC Symbol;Acc:HGNC:18410]	36916	-0.804362	-0.443594	Yes
row_157	GPC3	glypican 3 [Source:HGNC Symbol;Acc:HGNC:4451]	36919	-0.805354	-0.437531	Yes
row_158	IRS2	insulin receptor substrate 2 [Source:HGNC Symbol;Acc:HGNC:6126]	36932	-0.808631	-0.431692	Yes
row_159	NT5E	5'-nucleotidase ecto [Source:HGNC Symbol;Acc:HGNC:8021]	36966	-0.816091	-0.426321	Yes
row_160	FAM162A	family with sequence similarity 162 member A [Source:HGNC Symbol;Acc:HGNC:17865]	36997	-0.818583	-0.420856	Yes
row_161	ERO1A	endoplasmic reticulum oxidoreductase 1 alpha [Source:HGNC Symbol;Acc:HGNC:13280]	37173	-0.845173	-0.418808	Yes
row_162	CLN6	CLN6 transmembrane ER protein [Source:HGNC Symbol;Acc:HGNC:2077]	37501	-0.869419	-0.42037	Yes
row_163	ISG20	interferon stimulated exonuclease gene 20 [Source:HGNC Symbol;Acc:HGNC:6130]	37518	-0.874815	-0.414129	Yes
row_164	SLC25A13	solute carrier family 25 member 13 [Source:HGNC Symbol;Acc:HGNC:10983]	37677	-0.910957	-0.411157	Yes
row_165	ANG	angiogenin [Source:HGNC Symbol;Acc:HGNC:483]	37742	-0.924586	-0.405736	Yes
row_166	ME1	malic enzyme 1 [Source:HGNC Symbol;Acc:HGNC:6983]	37818	-0.947165	-0.400418	Yes
row_167	PC	pyruvate carboxylase [Source:HGNC Symbol;Acc:HGNC:8636]	37819	-0.947677	-0.393225	Yes
row_168	GAL3ST1	galactose-3-O-sulfotransferase 1 [Source:HGNC Symbol;Acc:HGNC:24240]	37894	-0.964093	-0.387753	Yes
row_169	PPFIA4	PTPRF interacting protein alpha 4 [Source:HGNC Symbol;Acc:HGNC:9248]	37898	-0.965123	-0.380502	Yes
row_170	HDLBP	high density lipoprotein binding protein [Source:HGNC Symbol;Acc:HGNC:4857]	37949	-0.978944	-0.374319	Yes
row_171	GYS1	glycogen synthase 1 [Source:HGNC Symbol;Acc:HGNC:4706]	38026	-0.995584	-0.368658	Yes
row_172	IDH1	isocitrate dehydrogenase (NADP(+)) 1 [Source:HGNC Symbol;Acc:HGNC:5382]	38102	-1.02176	-0.362774	Yes
row_173	SLC16A3	solute carrier family 16 member 3 [Source:HGNC Symbol;Acc:HGNC:10924]	38112	-1.02487	-0.355219	Yes
row_174	UGP2	UDP-glucose pyrophosphorylase 2 [Source:HGNC Symbol;Acc:HGNC:12527]	38321	-1.10693	-0.352008	Yes
row_175	CHPF	chondroitin polymerizing factor [Source:HGNC Symbol;Acc:HGNC:24291]	38460	-1.16529	-0.346607	Yes
row_176	STC2	stanniocalcin 2 [Source:HGNC Symbol;Acc:HGNC:11374]	38487	-1.17551	-0.338332	Yes
row_177	CITED2	Cbp/p300 interacting transactivator with Glu/Asp rich carboxy-terminal domain 2 [Source:HGNC Symbol;Acc:HGNC:1987]	38507	-1.1841	-0.329818	Yes
row_178	B4GALT1	beta-1,4-galactosyltransferase 1 [Source:HGNC Symbol;Acc:HGNC:924]	38613	-1.23199	-0.323087	Yes
row_179	PFKP	phosphofructokinase, platelet [Source:HGNC Symbol;Acc:HGNC:8878]	38774	-1.31275	-0.317115	Yes
row_180	ALDOA	aldolase, fructose-bisphosphate A [Source:HGNC Symbol;Acc:HGNC:414]	38815	-1.3428	-0.30792	Yes
row_181	ABCB6	ATP binding cassette subfamily B member 6 (Langereis blood group) [Source:HGNC Symbol;Acc:HGNC:47]	39016	-1.45646	-0.301856	Yes
row_182	ME2	malic enzyme 2 [Source:HGNC Symbol;Acc:HGNC:6984]	39076	-1.49727	-0.291963	Yes
row_183	DDIT4	DNA damage inducible transcript 4 [Source:HGNC Symbol;Acc:HGNC:24944]	39111	-1.52841	-0.28121	Yes
row_184	PHKA2	phosphorylase kinase regulatory subunit alpha 2 [Source:HGNC Symbol;Acc:HGNC:8926]	39118	-1.53258	-0.269726	Yes
row_185	ENO2	enolase 2 [Source:HGNC Symbol;Acc:HGNC:3353]	39155	-1.55521	-0.258819	Yes
row_186	GPC4	glypican 4 [Source:HGNC Symbol;Acc:HGNC:4452]	39158	-1.55718	-0.247048	Yes
row_187	HK2	hexokinase 2 [Source:HGNC Symbol;Acc:HGNC:4923]	39190	-1.57985	-0.235829	Yes
row_188	SDC2	syndecan 2 [Source:HGNC Symbol;Acc:HGNC:10659]	39206	-1.59017	-0.224133	Yes
row_189	VEGFA	vascular endothelial growth factor A [Source:HGNC Symbol;Acc:HGNC:12680]	39331	-1.70429	-0.21429	Yes
row_190	TGFA	transforming growth factor alpha [Source:HGNC Symbol;Acc:HGNC:11765]	39332	-1.70435	-0.201353	Yes
row_191	ENO1	enolase 1 [Source:HGNC Symbol;Acc:HGNC:3350]	39543	-1.91359	-0.192068	Yes
row_192	PKP2	plakophilin 2 [Source:HGNC Symbol;Acc:HGNC:9024]	39788	-2.31976	-0.180549	Yes
row_193	PDK3	pyruvate dehydrogenase kinase 3 [Source:HGNC Symbol;Acc:HGNC:8811]	39843	-2.4385	-0.163386	Yes
row_194	EGLN3	egl-9 family hypoxia inducible factor 3 [Source:HGNC Symbol;Acc:HGNC:14661]	39993	-2.8924	-0.145149	Yes
row_195	VLDLR	very low density lipoprotein receptor [Source:HGNC Symbol;Acc:HGNC:12698]	40003	-2.92206	-0.123192	Yes
row_196	VCAN	versican [Source:HGNC Symbol;Acc:HGNC:2464]	40030	-3.05713	-0.100635	Yes
row_197	CD44	CD44 molecule (Indian blood group) [Source:HGNC Symbol;Acc:HGNC:1681]	40226	-4.55202	-0.0709476	Yes
row_198	ELF3	E74 like ETS transcription factor 3 [Source:HGNC Symbol;Acc:HGNC:3318]	40245	-4.70308	-0.0356958	Yes
row_199	TKTL1	transketolase like 1 [Source:HGNC Symbol;Acc:HGNC:11835]	40249	-4.75831	0.000349679	Yes

## Sheet: IL6_JAK_STAT
NAME	SYMBOL	TITLE	RANK IN GENE LIST	RANK METRIC SCORE	RUNNING ES	CORE ENRICHMENT
row_0	IL6	interleukin 6 [Source:HGNC Symbol;Acc:HGNC:6018]	357	2.23092	0.026096	No
row_1	CXCL3	C-X-C motif chemokine ligand 3 [Source:HGNC Symbol;Acc:HGNC:4604]	378	2.17587	0.0597167	No
row_2	TNFRSF21	TNF receptor superfamily member 21 [Source:HGNC Symbol;Acc:HGNC:13469]	954	1.3861	0.0671396	No
row_3	TYK2	tyrosine kinase 2 [Source:HGNC Symbol;Acc:HGNC:12440]	1126	1.27711	0.082909	No
row_4	TGFB1	transforming growth factor beta 1 [Source:HGNC Symbol;Acc:HGNC:11766]	1141	1.26875	0.102455	No
row_5	TNFRSF12A	TNF receptor superfamily member 12A [Source:HGNC Symbol;Acc:HGNC:18152]	3936	0.627953	0.0427593	No
row_6	HAX1	HCLS1 associated protein X-1 [Source:HGNC Symbol;Acc:HGNC:16915]	4191	0.594372	0.0457573	No
row_7	GRB2	growth factor receptor bound protein 2 [Source:HGNC Symbol;Acc:HGNC:4566]	4294	0.581011	0.052329	No
row_8	BAK1	BCL2 antagonist/killer 1 [Source:HGNC Symbol;Acc:HGNC:949]	4512	0.554805	0.0556275	No
row_9	TNF	tumor necrosis factor [Source:HGNC Symbol;Acc:HGNC:11892]	4905	0.516406	0.0539681	No
row_10	STAT1	signal transducer and activator of transcription 1 [Source:HGNC Symbol;Acc:HGNC:11362]	6047	0.434969	0.0323893	No
row_11	MYD88	MYD88 innate immune signal transduction adaptor [Source:HGNC Symbol;Acc:HGNC:7562]	6099	0.430631	0.0378724	No
row_12	CXCL11	C-X-C motif chemokine ligand 11 [Source:HGNC Symbol;Acc:HGNC:10638]	6156	0.428955	0.0432047	No
row_13	PLA2G2A	phospholipase A2 group IIA [Source:HGNC Symbol;Acc:HGNC:9031]	6636	0.426389	0.0379684	No
row_14	IL12RB1	interleukin 12 receptor subunit beta 1 [Source:HGNC Symbol;Acc:HGNC:5971]	6904	0.42082	0.0379215	No
row_15	PTPN2	protein tyrosine phosphatase non-receptor type 2 [Source:HGNC Symbol;Acc:HGNC:9650]	7408	0.402201	0.0317086	No
row_16	STAM2	signal transducing adaptor molecule 2 [Source:HGNC Symbol;Acc:HGNC:11358]	7787	0.372181	0.0281361	No
row_17	IFNGR1	interferon gamma receptor 1 [Source:HGNC Symbol;Acc:HGNC:5439]	7885	0.362848	0.0314114	No
row_18	A2M	alpha-2-macroglobulin [Source:HGNC Symbol;Acc:HGNC:7]	9017	0.275732	0.00758459	No
row_19	IRF9	interferon regulatory factor 9 [Source:HGNC Symbol;Acc:HGNC:6131]	9237	0.260196	0.00621369	No
row_20	CBL	Cbl proto-oncogene [Source:HGNC Symbol;Acc:HGNC:1541]	9461	0.244166	0.00449188	No
row_21	IL6ST	interleukin 6 signal transducer [Source:HGNC Symbol;Acc:HGNC:6021]	10936	0.15139	-0.0298219	No
row_22	IRF1	interferon regulatory factor 1 [Source:HGNC Symbol;Acc:HGNC:6116]	10950	0.150174	-0.0277907	No
row_23	SOCS1	suppressor of cytokine signaling 1 [Source:HGNC Symbol;Acc:HGNC:19383]	11183	0.135085	-0.031447	No
row_24	PTPN11	protein tyrosine phosphatase non-receptor type 11 [Source:HGNC Symbol;Acc:HGNC:9644]	11855	0.0924936	-0.0466977	No
row_25	IL17RA	interleukin 17 receptor A [Source:HGNC Symbol;Acc:HGNC:5985]	12332	0.0609787	-0.0575891	No
row_26	CCR1	C-C motif chemokine receptor 1 [Source:HGNC Symbol;Acc:HGNC:1602]	12938	0.0173259	-0.0723758	No
row_27	IL2RG	interleukin 2 receptor subunit gamma [Source:HGNC Symbol;Acc:HGNC:6010]	13318	0	-0.0818091	No
row_28	IL2RA	interleukin 2 receptor subunit alpha [Source:HGNC Symbol;Acc:HGNC:6008]	13327	0	-0.0820082	No
row_29	IL3RA	interleukin 3 receptor subunit alpha [Source:HGNC Symbol;Acc:HGNC:6012]	13879	0	-0.0957225	No
row_30	ACVRL1	activin A receptor like type 1 [Source:HGNC Symbol;Acc:HGNC:175]	13933	0	-0.0970417	No
row_31	DNTT	DNA nucleotidylexotransferase [Source:HGNC Symbol;Acc:HGNC:2983]	14543	0	-0.1122	No
row_32	CXCL9	C-X-C motif chemokine ligand 9 [Source:HGNC Symbol;Acc:HGNC:7098]	15827	0	-0.144133	No
row_33	PF4	platelet factor 4 [Source:HGNC Symbol;Acc:HGNC:8861]	16153	0	-0.152223	No
row_34	IL9R	interleukin 9 receptor [Source:HGNC Symbol;Acc:HGNC:6030]	17701	0	-0.190727	No
row_35	TLR2	toll like receptor 2 [Source:HGNC Symbol;Acc:HGNC:11848]	17894	0	-0.195506	No
row_36	CCL7	C-C motif chemokine ligand 7 [Source:HGNC Symbol;Acc:HGNC:10634]	19869	0	-0.244639	No
row_37	CRLF2	cytokine receptor like factor 2 [Source:HGNC Symbol;Acc:HGNC:14281]	20909	0	-0.270499	No
row_38	CSF2RA	colony stimulating factor 2 receptor subunit alpha [Source:HGNC Symbol;Acc:HGNC:2435]	21563	0	-0.286752	No
row_39	CSF2	colony stimulating factor 2 [Source:HGNC Symbol;Acc:HGNC:2434]	22584	0	-0.31214	No
row_40	REG1A	regenerating family member 1 alpha [Source:HGNC Symbol;Acc:HGNC:9951]	25760	0	-0.391165	No
row_41	LEPR	leptin receptor [Source:HGNC Symbol;Acc:HGNC:6554]	28385	-0.0980534	-0.454939	No
row_42	ACVR1B	activin A receptor type 1B [Source:HGNC Symbol;Acc:HGNC:172]	28562	-0.109815	-0.457597	No
row_43	IL13RA1	interleukin 13 receptor subunit alpha 1 [Source:HGNC Symbol;Acc:HGNC:5974]	28754	-0.123348	-0.460417	No
row_44	JUN	Jun proto-oncogene, AP-1 transcription factor subunit [Source:HGNC Symbol;Acc:HGNC:6204]	28814	-0.127209	-0.459891	No
row_45	MAP3K8	mitogen-activated protein kinase kinase kinase 8 [Source:HGNC Symbol;Acc:HGNC:6860]	29020	-0.140693	-0.462787	No
row_46	CXCL13	C-X-C motif chemokine ligand 13 [Source:HGNC Symbol;Acc:HGNC:10639]	29691	-0.186011	-0.476547	No
row_47	LTB	lymphotoxin beta [Source:HGNC Symbol;Acc:HGNC:6711]	29741	-0.188283	-0.474814	No
row_48	CXCL1	C-X-C motif chemokine ligand 1 [Source:HGNC Symbol;Acc:HGNC:4602]	30028	-0.207819	-0.478674	No
row_49	PTPN1	protein tyrosine phosphatase non-receptor type 1 [Source:HGNC Symbol;Acc:HGNC:9642]	30586	-0.244237	-0.488708	No
row_50	ITGA4	integrin subunit alpha 4 [Source:HGNC Symbol;Acc:HGNC:6140]	30676	-0.250947	-0.486988	No
row_51	CSF3R	colony stimulating factor 3 receptor [Source:HGNC Symbol;Acc:HGNC:2439]	30876	-0.265964	-0.487771	No
row_52	INHBE	inhibin subunit beta E [Source:HGNC Symbol;Acc:HGNC:24029]	31198	-0.29136	-0.491192	No
row_53	EBI3	Epstein-Barr virus induced 3 [Source:HGNC Symbol;Acc:HGNC:3129]	31565	-0.316336	-0.495341	No
row_54	LTBR	lymphotoxin beta receptor [Source:HGNC Symbol;Acc:HGNC:6718]	31878	-0.341038	-0.497759	No
row_55	HMOX1	heme oxygenase 1 [Source:HGNC Symbol;Acc:HGNC:5013]	31903	-0.343153	-0.492976	No
row_56	IL15RA	interleukin 15 receptor subunit alpha [Source:HGNC Symbol;Acc:HGNC:5978]	32719	-0.423383	-0.506622	No
row_57	CXCL10	C-X-C motif chemokine ligand 10 [Source:HGNC Symbol;Acc:HGNC:10637]	33683	-0.435529	-0.523762	No
row_58	TNFRSF1B	TNF receptor superfamily member 1B [Source:HGNC Symbol;Acc:HGNC:11917]	34227	-0.460472	-0.530057	No
row_59	CSF2RB	colony stimulating factor 2 receptor subunit beta [Source:HGNC Symbol;Acc:HGNC:2436]	34710	-0.49311	-0.534321	Yes
row_60	OSMR	oncostatin M receptor [Source:HGNC Symbol;Acc:HGNC:8507]	34748	-0.493539	-0.527503	Yes
row_61	IFNAR1	interferon alpha and beta receptor subunit 1 [Source:HGNC Symbol;Acc:HGNC:5432]	34900	-0.50057	-0.523412	Yes
row_62	IFNGR2	interferon gamma receptor 2 [Source:HGNC Symbol;Acc:HGNC:5440]	35238	-0.529633	-0.523496	Yes
row_63	CD36	CD36 molecule [Source:HGNC Symbol;Acc:HGNC:1663]	35437	-0.550481	-0.519792	Yes
row_64	CD14	CD14 molecule [Source:HGNC Symbol;Acc:HGNC:1628]	35504	-0.560579	-0.512645	Yes
row_65	TNFRSF1A	TNF receptor superfamily member 1A [Source:HGNC Symbol;Acc:HGNC:11916]	35505	-0.560698	-0.503853	Yes
row_66	STAT3	signal transducer and activator of transcription 3 [Source:HGNC Symbol;Acc:HGNC:11364]	35523	-0.563908	-0.495433	Yes
row_67	STAT2	signal transducer and activator of transcription 2 [Source:HGNC Symbol;Acc:HGNC:11363]	36357	-0.698542	-0.505213	Yes
row_68	IL4R	interleukin 4 receptor [Source:HGNC Symbol;Acc:HGNC:6015]	36473	-0.719932	-0.496787	Yes
row_69	CD9	CD9 molecule [Source:HGNC Symbol;Acc:HGNC:1709]	37497	-0.86856	-0.50863	Yes
row_70	PIM1	Pim-1 proto-oncogene, serine/threonine kinase [Source:HGNC Symbol;Acc:HGNC:8986]	37516	-0.874274	-0.495369	Yes
row_71	ITGB3	integrin subunit beta 3 [Source:HGNC Symbol;Acc:HGNC:6156]	37559	-0.884472	-0.482545	Yes
row_72	PDGFC	platelet derived growth factor C [Source:HGNC Symbol;Acc:HGNC:8801]	37620	-0.897501	-0.469965	Yes
row_73	CD38	CD38 molecule [Source:HGNC Symbol;Acc:HGNC:1667]	38053	-1.00336	-0.464985	Yes
row_74	SOCS3	suppressor of cytokine signaling 3 [Source:HGNC Symbol;Acc:HGNC:19391]	38291	-1.09603	-0.453697	Yes
row_75	IL1R1	interleukin 1 receptor type 1 [Source:HGNC Symbol;Acc:HGNC:5993]	38435	-1.15581	-0.439133	Yes
row_76	IL7	interleukin 7 [Source:HGNC Symbol;Acc:HGNC:6023]	39141	-1.54599	-0.432439	Yes
row_77	IL10RB	interleukin 10 receptor subunit beta [Source:HGNC Symbol;Acc:HGNC:5965]	39251	-1.62696	-0.40964	Yes
row_78	IL1R2	interleukin 1 receptor type 2 [Source:HGNC Symbol;Acc:HGNC:5994]	39563	-1.93716	-0.387006	Yes
row_79	IL18R1	interleukin 18 receptor 1 [Source:HGNC Symbol;Acc:HGNC:5988]	39564	-1.93771	-0.356621	Yes
row_80	CSF1	colony stimulating factor 1 [Source:HGNC Symbol;Acc:HGNC:2432]	39603	-2.00131	-0.326186	Yes
row_81	PIK3R5	phosphoinositide-3-kinase regulatory subunit 5 [Source:HGNC Symbol;Acc:HGNC:30035]	39977	-2.80602	-0.29147	Yes
row_82	IL17RB	interleukin 17 receptor B [Source:HGNC Symbol;Acc:HGNC:18015]	40027	-3.0382	-0.24505	Yes
row_83	FAS	Fas cell surface death receptor [Source:HGNC Symbol;Acc:HGNC:11920]	40046	-3.1213	-0.196554	Yes
row_84	CNTFR	ciliary neurotrophic factor receptor [Source:HGNC Symbol;Acc:HGNC:2170]	40178	-4.02916	-0.136636	Yes
row_85	IL1B	interleukin 1 beta [Source:HGNC Symbol;Acc:HGNC:5992]	40203	-4.29353	-0.0699091	Yes
row_86	CD44	CD44 molecule (Indian blood group) [Source:HGNC Symbol;Acc:HGNC:1681]	40226	-4.55202	0.000920821	Yes

## Sheet: G2_M_Checkpoint
NAME	SYMBOL	TITLE	RANK IN GENE LIST	RANK METRIC SCORE	RUNNING ES	CORE ENRICHMENT
row_0	MEIS1	Meis homeobox 1 [Source:HGNC Symbol;Acc:HGNC:7000]	477	1.97691	0.00955945	No
row_1	TGFB1	transforming growth factor beta 1 [Source:HGNC Symbol;Acc:HGNC:11766]	1141	1.26875	0.00678708	No
row_2	ATF5	activating transcription factor 5 [Source:HGNC Symbol;Acc:HGNC:790]	1277	1.20139	0.0164622	No
row_3	EGF	epidermal growth factor [Source:HGNC Symbol;Acc:HGNC:3229]	1601	1.0616	0.019927	No
row_4	NUSAP1	nucleolar and spindle associated protein 1 [Source:HGNC Symbol;Acc:HGNC:18538]	2058	0.931004	0.0186542	No
row_5	H2AZ1	H2A.Z variant histone 1 [Source:HGNC Symbol;Acc:HGNC:4741]	2754	0.818123	0.0101902	No
row_6	PURA	purine rich element binding protein A [Source:HGNC Symbol;Acc:HGNC:9701]	2901	0.80048	0.0152377	No
row_7	PRPF4B	pre-mRNA processing factor 4B [Source:HGNC Symbol;Acc:HGNC:17346]	2937	0.79114	0.0229543	No
row_8	SMC4	structural maintenance of chromosomes 4 [Source:HGNC Symbol;Acc:HGNC:14013]	3027	0.775849	0.0291571	No
row_9	UCK2	uridine-cytidine kinase 2 [Source:HGNC Symbol;Acc:HGNC:12562]	3180	0.752281	0.0335315	No
row_10	CDC7	cell division cycle 7 [Source:HGNC Symbol;Acc:HGNC:1745]	3233	0.741552	0.0402854	No
row_11	PTTG1	PTTG1 regulator of sister chromatid separation, securin [Source:HGNC Symbol;Acc:HGNC:9690]	3575	0.683433	0.0391948	No
row_12	NASP	nuclear autoantigenic sperm protein [Source:HGNC Symbol;Acc:HGNC:7644]	3812	0.645627	0.0403145	No
row_13	G3BP1	G3BP stress granule assembly factor 1 [Source:HGNC Symbol;Acc:HGNC:30292]	4073	0.610282	0.0404513	No
row_14	PRMT5	protein arginine methyltransferase 5 [Source:HGNC Symbol;Acc:HGNC:10894]	4225	0.589909	0.0430876	No
row_15	PDS5B	PDS5 cohesin associated factor B [Source:HGNC Symbol;Acc:HGNC:20418]	4583	0.546263	0.0401082	No
row_16	CHAF1A	chromatin assembly factor 1 subunit A [Source:HGNC Symbol;Acc:HGNC:1910]	5281	0.492049	0.0280538	No
row_17	DBF4	DBF4 zinc finger [Source:HGNC Symbol;Acc:HGNC:17364]	5414	0.489903	0.0300785	No
row_18	E2F3	E2F transcription factor 3 [Source:HGNC Symbol;Acc:HGNC:3115]	5648	0.475209	0.0294226	No
row_19	BRCA2	BRCA2 DNA repair associated [Source:HGNC Symbol;Acc:HGNC:1101]	5922	0.447933	0.0274722	No
row_20	HOXC10	homeobox C10 [Source:HGNC Symbol;Acc:HGNC:5122]	7411	0.401901	-0.00530449	No
row_21	TNPO2	transportin 2 [Source:HGNC Symbol;Acc:HGNC:19998]	7429	0.400495	-0.00138021	No
row_22	PRIM2	DNA primase subunit 2 [Source:HGNC Symbol;Acc:HGNC:9370]	7551	0.390965	-0.000155253	No
row_23	TRA2B	transformer 2 beta homolog [Source:HGNC Symbol;Acc:HGNC:10781]	8263	0.331451	-0.0143029	No
row_24	NOLC1	nucleolar and coiled-body phosphoprotein 1 [Source:HGNC Symbol;Acc:HGNC:15608]	8954	0.27892	-0.0284969	No
row_25	HIF1A	hypoxia inducible factor 1 subunit alpha [Source:HGNC Symbol;Acc:HGNC:4910]	9156	0.26528	-0.0306334	No
row_26	FANCC	FA complementation group C [Source:HGNC Symbol;Acc:HGNC:3584]	9524	0.240464	-0.0371828	No
row_27	H2BC12	H2B clustered histone 12 [Source:HGNC Symbol;Acc:HGNC:13954]	9596	0.235762	-0.036395	No
row_28	PML	PML nuclear body scaffold [Source:HGNC Symbol;Acc:HGNC:9113]	9808	0.219064	-0.039283	No
row_29	AMD1	adenosylmethionine decarboxylase 1 [Source:HGNC Symbol;Acc:HGNC:457]	9913	0.210798	-0.0395899	No
row_30	DR1	down-regulator of transcription 1 [Source:HGNC Symbol;Acc:HGNC:3017]	10106	0.198602	-0.0422259	No
row_31	CCNF	cyclin F [Source:HGNC Symbol;Acc:HGNC:1591]	10209	0.191785	-0.0426894	No
row_32	UPF1	UPF1 RNA helicase and ATPase [Source:HGNC Symbol;Acc:HGNC:9962]	10700	0.166754	-0.0531092	No
row_33	NDC80	NDC80 kinetochore complex component [Source:HGNC Symbol;Acc:HGNC:16909]	11179	0.135545	-0.0635683	No
row_34	RBM14	RNA binding motif protein 14 [Source:HGNC Symbol;Acc:HGNC:14219]	11256	0.129752	-0.0640564	No
row_35	SS18	SS18 subunit of BAF chromatin remodeling complex [Source:HGNC Symbol;Acc:HGNC:11340]	11365	0.123437	-0.0654118	No
row_36	SLC7A1	solute carrier family 7 member 1 [Source:HGNC Symbol;Acc:HGNC:11057]	11374	0.123034	-0.0642756	No
row_37	KIF2C	kinesin family member 2C [Source:HGNC Symbol;Acc:HGNC:6393]	11379	0.122792	-0.0630422	No
row_38	PAFAH1B1	platelet activating factor acetylhydrolase 1b regulatory subunit 1 [Source:HGNC Symbol;Acc:HGNC:8574]	11438	0.11971	-0.06319	No
row_39	HUS1	HUS1 checkpoint clamp component [Source:HGNC Symbol;Acc:HGNC:5309]	11665	0.103605	-0.0677061	No
row_40	ILF3	interleukin enhancer binding factor 3 [Source:HGNC Symbol;Acc:HGNC:6038]	11748	0.0986724	-0.0686814	No
row_41	KIF5B	kinesin family member 5B [Source:HGNC Symbol;Acc:HGNC:6324]	11913	0.0894893	-0.0718031	No
row_42	BUB3	BUB3 mitotic checkpoint protein [Source:HGNC Symbol;Acc:HGNC:1151]	11954	0.0863942	-0.0718635	No
row_43	DDX39A	DExD-box helicase 39A [Source:HGNC Symbol;Acc:HGNC:17821]	12050	0.0800923	-0.073365	No
row_44	KMT5A	lysine methyltransferase 5A [Source:HGNC Symbol;Acc:HGNC:29489]	12056	0.0797319	-0.0726241	No
row_45	TROAP	trophinin associated protein [Source:HGNC Symbol;Acc:HGNC:12327]	12074	0.0785695	-0.0721953	No
row_46	H2AZ2	H2A.Z variant histone 2 [Source:HGNC Symbol;Acc:HGNC:20664]	12258	0.066653	-0.0760393	No
row_47	MTF2	metal response element binding transcription factor 2 [Source:HGNC Symbol;Acc:HGNC:29535]	12316	0.0622233	-0.0767864	No
row_48	RAD54L	RAD54 like [Source:HGNC Symbol;Acc:HGNC:9826]	12318	0.0619054	-0.0761392	No
row_49	AURKB	aurora kinase B [Source:HGNC Symbol;Acc:HGNC:11390]	12625	0.0402345	-0.0833401	No
row_50	NUP98	nucleoporin 98 and 96 precursor [Source:HGNC Symbol;Acc:HGNC:8068]	12777	0.0294125	-0.0867897	No
row_51	KPNA2	karyopherin subunit alpha 2 [Source:HGNC Symbol;Acc:HGNC:6395]	12822	0.0260875	-0.0876047	No
row_52	CASP8AP2	caspase 8 associated protein 2 [Source:HGNC Symbol;Acc:HGNC:1510]	12874	0.0221501	-0.0886371	No
row_53	ESPL1	extra spindle pole bodies like 1, separase [Source:HGNC Symbol;Acc:HGNC:16856]	12898	0.0203876	-0.0889898	No
row_54	MCM6	minichromosome maintenance complex component 6 [Source:HGNC Symbol;Acc:HGNC:6949]	13071	0.00795117	-0.0931966	No
row_55	RPA2	replication protein A2 [Source:HGNC Symbol;Acc:HGNC:10290]	13184	0.00316153	-0.0959578	No
row_56	PTTG3P	pituitary tumor-transforming 3, pseudogene [Source:HGNC Symbol;Acc:HGNC:13422]	15217	0	-0.146677	No
row_57	CDKN2C	cyclin dependent kinase inhibitor 2C [Source:HGNC Symbol;Acc:HGNC:1789]	16881	0	-0.188185	No
row_58	EFNA5	ephrin A5 [Source:HGNC Symbol;Acc:HGNC:3225]	17919	0	-0.214069	No
row_59	CCNB2	cyclin B2 [Source:HGNC Symbol;Acc:HGNC:1580]	26493	-0.00348224	-0.428014	No
row_60	KATNA1	katanin catalytic subunit A1 [Source:HGNC Symbol;Acc:HGNC:6216]	26560	-0.00452672	-0.429612	No
row_61	MAPK14	mitogen-activated protein kinase 14 [Source:HGNC Symbol;Acc:HGNC:6876]	26720	-0.0103547	-0.433468	No
row_62	CDC20	cell division cycle 20 [Source:HGNC Symbol;Acc:HGNC:1723]	27046	-0.0210938	-0.441351	No
row_63	TACC3	transforming acidic coiled-coil containing protein 3 [Source:HGNC Symbol;Acc:HGNC:11524]	27374	-0.0314449	-0.449172	No
row_64	CHMP1A	charged multivesicular body protein 1A [Source:HGNC Symbol;Acc:HGNC:8740]	27384	-0.0321931	-0.449047	No
row_65	CHEK1	checkpoint kinase 1 [Source:HGNC Symbol;Acc:HGNC:1925]	27423	-0.0350825	-0.449614	No
row_66	CENPA	centromere protein A [Source:HGNC Symbol;Acc:HGNC:1851]	27526	-0.0387021	-0.45174	No
row_67	TMPO	thymopoietin [Source:HGNC Symbol;Acc:HGNC:11875]	27689	-0.0463261	-0.45528	No
row_68	WRN	WRN RecQ like helicase [Source:HGNC Symbol;Acc:HGNC:12791]	27768	-0.0499896	-0.456685	No
row_69	HIRA	histone cell cycle regulator [Source:HGNC Symbol;Acc:HGNC:4916]	27823	-0.0543738	-0.457442	No
row_70	TTK	TTK protein kinase [Source:HGNC Symbol;Acc:HGNC:12401]	27852	-0.0564361	-0.457528	No
row_71	INCENP	inner centromere protein [Source:HGNC Symbol;Acc:HGNC:6058]	27998	-0.0679601	-0.460409	No
row_72	TPX2	TPX2 microtubule nucleation factor [Source:HGNC Symbol;Acc:HGNC:1249]	28009	-0.0687895	-0.459912	No
row_73	TRAIP	TRAF interacting protein [Source:HGNC Symbol;Acc:HGNC:30764]	28144	-0.0789824	-0.462399	No
row_74	KNL1	kinetochore scaffold 1 [Source:HGNC Symbol;Acc:HGNC:24054]	28364	-0.0969148	-0.466813	No
row_75	SMC1A	structural maintenance of chromosomes 1A [Source:HGNC Symbol;Acc:HGNC:11111]	28382	-0.0978597	-0.466175	No
row_76	ARID4A	AT-rich interaction domain 4A [Source:HGNC Symbol;Acc:HGNC:9885]	28444	-0.101979	-0.46659	No
row_77	E2F4	E2F transcription factor 4 [Source:HGNC Symbol;Acc:HGNC:3118]	28526	-0.107852	-0.467441	No
row_78	CENPE	centromere protein E [Source:HGNC Symbol;Acc:HGNC:1856]	28635	-0.115533	-0.468882	No
row_79	TOP1	DNA topoisomerase I [Source:HGNC Symbol;Acc:HGNC:11986]	28638	-0.115778	-0.467675	No
row_80	TLE3	TLE family member 3, transcriptional corepressor [Source:HGNC Symbol;Acc:HGNC:11839]	28695	-0.119288	-0.467777	No
row_81	ODF2	outer dense fiber of sperm tails 2 [Source:HGNC Symbol;Acc:HGNC:8114]	28758	-0.123626	-0.467982	No
row_82	CDC27	cell division cycle 27 [Source:HGNC Symbol;Acc:HGNC:1728]	28808	-0.126741	-0.467829	No
row_83	KIF11	kinesin family member 11 [Source:HGNC Symbol;Acc:HGNC:6388]	28830	-0.127951	-0.466964	No
row_84	KIF22	kinesin family member 22 [Source:HGNC Symbol;Acc:HGNC:6391]	28899	-0.132516	-0.467223	No
row_85	LMNB1	lamin B1 [Source:HGNC Symbol;Acc:HGNC:6637]	28935	-0.134851	-0.466632	No
row_86	STIL	STIL centriolar assembly protein [Source:HGNC Symbol;Acc:HGNC:10879]	29038	-0.142069	-0.467635	No
row_87	FBXO5	F-box protein 5 [Source:HGNC Symbol;Acc:HGNC:13584]	29457	-0.16944	-0.476229	No
row_88	SMARCC1	SWI/SNF related, matrix associated, actin dependent regulator of chromatin subfamily c member 1 [Source:HGNC Symbol;Acc:HGNC:11104]	29461	-0.169936	-0.474459	No
row_89	LIG3	DNA ligase 3 [Source:HGNC Symbol;Acc:HGNC:6600]	29676	-0.185373	-0.477787	Yes
row_90	NEK2	NIMA related kinase 2 [Source:HGNC Symbol;Acc:HGNC:7745]	29680	-0.185476	-0.475848	Yes
row_91	NOTCH2	notch receptor 2 [Source:HGNC Symbol;Acc:HGNC:7882]	29723	-0.187291	-0.474863	Yes
row_92	CUL1	cullin 1 [Source:HGNC Symbol;Acc:HGNC:2551]	29763	-0.189658	-0.473777	Yes
row_93	CDKN1B	cyclin dependent kinase inhibitor 1B [Source:HGNC Symbol;Acc:HGNC:1785]	29777	-0.19113	-0.472026	Yes
row_94	CDKN3	cyclin dependent kinase inhibitor 3 [Source:HGNC Symbol;Acc:HGNC:1791]	29826	-0.194236	-0.471115	Yes
row_95	STAG1	stromal antigen 1 [Source:HGNC Symbol;Acc:HGNC:11354]	29843	-0.195513	-0.469392	Yes
row_96	KIF20B	kinesin family member 20B [Source:HGNC Symbol;Acc:HGNC:7212]	29884	-0.198055	-0.46824	Yes
row_97	CCNT1	cyclin T1 [Source:HGNC Symbol;Acc:HGNC:1599]	29914	-0.200021	-0.466792	Yes
row_98	HSPA8	heat shock protein family A (Hsp70) member 8 [Source:HGNC Symbol;Acc:HGNC:5241]	29939	-0.201685	-0.465201	Yes
row_99	SAP30	Sin3A associated protein 30 [Source:HGNC Symbol;Acc:HGNC:10532]	30050	-0.208361	-0.465684	Yes
row_100	BUB1	BUB1 mitotic checkpoint serine/threonine kinase [Source:HGNC Symbol;Acc:HGNC:1148]	30247	-0.221062	-0.468176	Yes
row_101	SMC2	structural maintenance of chromosomes 2 [Source:HGNC Symbol;Acc:HGNC:14011]	30250	-0.221306	-0.465823	Yes
row_102	CTCF	CCCTC-binding factor [Source:HGNC Symbol;Acc:HGNC:13723]	30296	-0.224791	-0.464505	Yes
row_103	CDK1	cyclin dependent kinase 1 [Source:HGNC Symbol;Acc:HGNC:1722]	30395	-0.231323	-0.46444	Yes
row_104	SFPQ	splicing factor proline and glutamine rich [Source:HGNC Symbol;Acc:HGNC:10774]	30422	-0.232639	-0.462563	Yes
row_105	PBK	PDZ binding kinase [Source:HGNC Symbol;Acc:HGNC:18282]	30503	-0.237556	-0.46198	Yes
row_106	CCNA2	cyclin A2 [Source:HGNC Symbol;Acc:HGNC:1578]	30621	-0.246295	-0.462226	Yes
row_107	GSPT1	G1 to S phase transition 1 [Source:HGNC Symbol;Acc:HGNC:4621]	30751	-0.255881	-0.462667	Yes
row_108	ORC5	origin recognition complex subunit 5 [Source:HGNC Symbol;Acc:HGNC:8491]	30794	-0.259371	-0.4609	Yes
row_109	UBE2S	ubiquitin conjugating enzyme E2 S [Source:HGNC Symbol;Acc:HGNC:17895]	30797	-0.259528	-0.458131	Yes
row_110	POLA2	DNA polymerase alpha 2, accessory subunit [Source:HGNC Symbol;Acc:HGNC:30073]	30863	-0.265165	-0.456875	Yes
row_111	CBX1	chromobox 1 [Source:HGNC Symbol;Acc:HGNC:1551]	30920	-0.268788	-0.455354	Yes
row_112	NUMA1	nuclear mitotic apparatus protein 1 [Source:HGNC Symbol;Acc:HGNC:8059]	31327	-0.29983	-0.462232	Yes
row_113	CUL5	cullin 5 [Source:HGNC Symbol;Acc:HGNC:2556]	31535	-0.314151	-0.463988	Yes
row_114	MYC	MYC proto-oncogene, bHLH transcription factor [Source:HGNC Symbol;Acc:HGNC:7553]	31699	-0.327101	-0.464505	Yes
row_115	MAD2L1	mitotic arrest deficient 2 like 1 [Source:HGNC Symbol;Acc:HGNC:6763]	31759	-0.330267	-0.462391	Yes
row_116	MNAT1	MNAT1 component of CDK activating kinase [Source:HGNC Symbol;Acc:HGNC:7181]	32007	-0.353653	-0.464716	Yes
row_117	YTHDC1	YTH domain containing 1 [Source:HGNC Symbol;Acc:HGNC:30626]	32069	-0.358918	-0.462342	Yes
row_118	KIF4A	kinesin family member 4A [Source:HGNC Symbol;Acc:HGNC:13339]	32103	-0.362676	-0.459227	Yes
row_119	MYBL2	MYB proto-oncogene like 2 [Source:HGNC Symbol;Acc:HGNC:7548]	32112	-0.363336	-0.455482	Yes
row_120	MARCKS	myristoylated alanine rich protein kinase C substrate [Source:HGNC Symbol;Acc:HGNC:6759]	32186	-0.369714	-0.45329	Yes
row_121	CCND1	cyclin D1 [Source:HGNC Symbol;Acc:HGNC:1582]	32202	-0.37113	-0.449634	Yes
row_122	NSD2	nuclear receptor binding SET domain protein 2 [Source:HGNC Symbol;Acc:HGNC:12766]	32236	-0.373615	-0.446401	Yes
row_123	CKS2	CDC28 protein kinase regulatory subunit 2 [Source:HGNC Symbol;Acc:HGNC:2000]	32261	-0.376911	-0.442908	Yes
row_124	ORC6	origin recognition complex subunit 6 [Source:HGNC Symbol;Acc:HGNC:17151]	32337	-0.384741	-0.440602	Yes
row_125	CDC6	cell division cycle 6 [Source:HGNC Symbol;Acc:HGNC:1744]	32409	-0.39111	-0.438128	Yes
row_126	AURKA	aurora kinase A [Source:HGNC Symbol;Acc:HGNC:11393]	32445	-0.394377	-0.434719	Yes
row_127	JPT1	Jupiter microtubule associated homolog 1 [Source:HGNC Symbol;Acc:HGNC:14569]	32489	-0.400019	-0.431449	Yes
row_128	EXO1	exonuclease 1 [Source:HGNC Symbol;Acc:HGNC:3511]	32679	-0.419514	-0.431611	Yes
row_129	SNRPD1	small nuclear ribonucleoprotein D1 polypeptide [Source:HGNC Symbol;Acc:HGNC:11158]	32686	-0.420388	-0.427196	Yes
row_130	PLK1	polo like kinase 1 [Source:HGNC Symbol;Acc:HGNC:9077]	32708	-0.421983	-0.423139	Yes
row_131	RAD23B	RAD23 homolog B, nucleotide excision repair protein [Source:HGNC Symbol;Acc:HGNC:9813]	33994	-0.439763	-0.450437	Yes
row_132	HMGB3	high mobility group box 3 [Source:HGNC Symbol;Acc:HGNC:5004]	34018	-0.441401	-0.446219	Yes
row_133	CDC45	cell division cycle 45 [Source:HGNC Symbol;Acc:HGNC:1739]	34080	-0.447995	-0.442877	Yes
row_134	NUP50	nucleoporin 50 [Source:HGNC Symbol;Acc:HGNC:8065]	34081	-0.448038	-0.438012	Yes
row_135	MCM3	minichromosome maintenance complex component 3 [Source:HGNC Symbol;Acc:HGNC:6945]	34136	-0.452207	-0.43445	Yes
row_136	KIF23	kinesin family member 23 [Source:HGNC Symbol;Acc:HGNC:6392]	34140	-0.45243	-0.429612	Yes
row_137	HMGA1	high mobility group AT-hook 1 [Source:HGNC Symbol;Acc:HGNC:5010]	34160	-0.453829	-0.425159	Yes
row_138	STMN1	stathmin 1 [Source:HGNC Symbol;Acc:HGNC:6510]	34217	-0.45974	-0.421565	Yes
row_139	HMGN2	high mobility group nucleosomal binding domain 2 [Source:HGNC Symbol;Acc:HGNC:4986]	34234	-0.46137	-0.416954	Yes
row_140	XPO1	exportin 1 [Source:HGNC Symbol;Acc:HGNC:12825]	34264	-0.465131	-0.412628	Yes
row_141	HNRNPU	heterogeneous nuclear ribonucleoprotein U [Source:HGNC Symbol;Acc:HGNC:5048]	34418	-0.482438	-0.411208	Yes
row_142	SMAD3	SMAD family member 3 [Source:HGNC Symbol;Acc:HGNC:6769]	34451	-0.484855	-0.406743	Yes
row_143	ATRX	ATRX chromatin remodeler [Source:HGNC Symbol;Acc:HGNC:886]	34466	-0.486813	-0.401806	Yes
row_144	EZH2	enhancer of zeste 2 polycomb repressive complex 2 subunit [Source:HGNC Symbol;Acc:HGNC:3527]	34747	-0.493474	-0.403437	Yes
row_145	SRSF10	serine and arginine rich splicing factor 10 [Source:HGNC Symbol;Acc:HGNC:16713]	34753	-0.493718	-0.398201	Yes
row_146	SRSF1	serine and arginine rich splicing factor 1 [Source:HGNC Symbol;Acc:HGNC:10780]	34892	-0.499738	-0.396219	Yes
row_147	PRC1	protein regulator of cytokinesis 1 [Source:HGNC Symbol;Acc:HGNC:9341]	34936	-0.504404	-0.391815	Yes
row_148	SYNCRIP	synaptotagmin binding cytoplasmic RNA interacting protein [Source:HGNC Symbol;Acc:HGNC:16918]	34968	-0.5075	-0.387079	Yes
row_149	RAD21	RAD21 cohesin complex component [Source:HGNC Symbol;Acc:HGNC:9811]	34980	-0.508437	-0.381833	Yes
row_150	CDK4	cyclin dependent kinase 4 [Source:HGNC Symbol;Acc:HGNC:1773]	35119	-0.518321	-0.379649	Yes
row_151	DKC1	dyskerin pseudouridine synthase 1 [Source:HGNC Symbol;Acc:HGNC:2890]	35135	-0.520217	-0.374375	Yes
row_152	SRSF2	serine and arginine rich splicing factor 2 [Source:HGNC Symbol;Acc:HGNC:10783]	35199	-0.52545	-0.370242	Yes
row_153	EWSR1	EWS RNA binding protein 1 [Source:HGNC Symbol;Acc:HGNC:3508]	35223	-0.528448	-0.365078	Yes
row_154	MEIS2	Meis homeobox 2 [Source:HGNC Symbol;Acc:HGNC:7001]	35277	-0.531821	-0.360627	Yes
row_155	RASAL2	RAS protein activator like 2 [Source:HGNC Symbol;Acc:HGNC:9874]	35303	-0.533757	-0.355455	Yes
row_156	PLK4	polo like kinase 4 [Source:HGNC Symbol;Acc:HGNC:11397]	35385	-0.542335	-0.351588	Yes
row_157	UBE2C	ubiquitin conjugating enzyme E2 C [Source:HGNC Symbol;Acc:HGNC:15937]	35407	-0.544835	-0.346196	Yes
row_158	LBR	lamin B receptor [Source:HGNC Symbol;Acc:HGNC:6518]	35447	-0.55249	-0.341171	Yes
row_159	POLQ	DNA polymerase theta [Source:HGNC Symbol;Acc:HGNC:9186]	35489	-0.558682	-0.336128	Yes
row_160	MT2A	metallothionein 2A [Source:HGNC Symbol;Acc:HGNC:7406]	35501	-0.560117	-0.330321	Yes
row_161	CKS1B	CDC28 protein kinase regulatory subunit 1B [Source:HGNC Symbol;Acc:HGNC:19083]	35520	-0.563047	-0.324656	Yes
row_162	BIRC5	baculoviral IAP repeat containing 5 [Source:HGNC Symbol;Acc:HGNC:593]	35725	-0.594615	-0.323292	Yes
row_163	HMMR	hyaluronan mediated motility receptor [Source:HGNC Symbol;Acc:HGNC:5012]	35726	-0.594903	-0.316832	Yes
row_164	RACGAP1	Rac GTPase activating protein 1 [Source:HGNC Symbol;Acc:HGNC:9804]	35894	-0.619432	-0.314275	Yes
row_165	MKI67	marker of proliferation Ki-67 [Source:HGNC Symbol;Acc:HGNC:7107]	35994	-0.636493	-0.309835	Yes
row_166	KPNB1	karyopherin subunit beta 1 [Source:HGNC Symbol;Acc:HGNC:6400]	36168	-0.662792	-0.306956	Yes
row_167	CENPF	centromere protein F [Source:HGNC Symbol;Acc:HGNC:1857]	36213	-0.672471	-0.300753	Yes
row_168	KIF15	kinesin family member 15 [Source:HGNC Symbol;Acc:HGNC:17273]	36224	-0.674825	-0.293675	Yes
row_169	E2F2	E2F transcription factor 2 [Source:HGNC Symbol;Acc:HGNC:3114]	36388	-0.704418	-0.290095	Yes
row_170	TENT4A	terminal nucleotidyltransferase 4A [Source:HGNC Symbol;Acc:HGNC:16705]	36518	-0.726865	-0.285423	Yes
row_171	RBL1	RB transcriptional corepressor like 1 [Source:HGNC Symbol;Acc:HGNC:9893]	36537	-0.73071	-0.277938	Yes
row_172	POLE	DNA polymerase epsilon, catalytic subunit [Source:HGNC Symbol;Acc:HGNC:9177]	36657	-0.75318	-0.27273	Yes
row_173	SLC12A2	solute carrier family 12 member 2 [Source:HGNC Symbol;Acc:HGNC:10911]	36787	-0.774596	-0.267539	Yes
row_174	H2AX	H2A.X variant histone [Source:HGNC Symbol;Acc:HGNC:4739]	36812	-0.779979	-0.259669	Yes
row_175	TOP2A	DNA topoisomerase II alpha [Source:HGNC Symbol;Acc:HGNC:11989]	37100	-0.834262	-0.257774	Yes
row_176	MCM5	minichromosome maintenance complex component 5 [Source:HGNC Symbol;Acc:HGNC:6948]	37111	-0.837072	-0.248935	Yes
row_177	MCM2	minichromosome maintenance complex component 2 [Source:HGNC Symbol;Acc:HGNC:6944]	37114	-0.837592	-0.23989	Yes
row_178	MAP3K20	mitogen-activated protein kinase kinase kinase 20 [Source:HGNC Symbol;Acc:HGNC:17797]	37422	-0.864181	-0.238169	Yes
row_179	CDC25B	cell division cycle 25B [Source:HGNC Symbol;Acc:HGNC:1726]	37426	-0.864486	-0.228858	Yes
row_180	CDC25A	cell division cycle 25A [Source:HGNC Symbol;Acc:HGNC:1725]	37563	-0.885261	-0.22264	Yes
row_181	SQLE	squalene epoxidase [Source:HGNC Symbol;Acc:HGNC:11279]	37569	-0.886665	-0.213137	Yes
row_182	HNRNPD	heterogeneous nuclear ribonucleoprotein D [Source:HGNC Symbol;Acc:HGNC:5036]	37643	-0.901709	-0.205169	Yes
row_183	FOXN3	forkhead box N3 [Source:HGNC Symbol;Acc:HGNC:1928]	37648	-0.903193	-0.195461	Yes
row_184	BCL3	BCL3 transcription coactivator [Source:HGNC Symbol;Acc:HGNC:998]	37741	-0.923925	-0.187726	Yes
row_185	DTYMK	deoxythymidylate kinase [Source:HGNC Symbol;Acc:HGNC:3061]	37864	-0.956279	-0.180388	Yes
row_186	ODC1	ornithine decarboxylase 1 [Source:HGNC Symbol;Acc:HGNC:8109]	38010	-0.989791	-0.17326	Yes
row_187	SLC38A1	solute carrier family 38 member 1 [Source:HGNC Symbol;Acc:HGNC:13447]	38085	-1.01677	-0.164066	Yes
row_188	CUL3	cullin 3 [Source:HGNC Symbol;Acc:HGNC:2553]	38091	-1.01831	-0.153134	Yes
row_189	E2F1	E2F transcription factor 1 [Source:HGNC Symbol;Acc:HGNC:3113]	38176	-1.04713	-0.143861	Yes
row_190	ABL1	ABL proto-oncogene 1, non-receptor tyrosine kinase [Source:HGNC Symbol;Acc:HGNC:76]	38227	-1.06724	-0.133521	Yes
row_191	GINS2	GINS complex subunit 2 [Source:HGNC Symbol;Acc:HGNC:24575]	38358	-1.12215	-0.124582	Yes
row_192	NCL	nucleolin [Source:HGNC Symbol;Acc:HGNC:7667]	38729	-1.28862	-0.119825	Yes
row_193	TFDP1	transcription factor Dp-1 [Source:HGNC Symbol;Acc:HGNC:11749]	39110	-1.52767	-0.112722	Yes
row_194	SUV39H1	suppressor of variegation 3-9 homolog 1 [Source:HGNC Symbol;Acc:HGNC:11479]	39169	-1.56865	-0.0971373	Yes
row_195	BARD1	BRCA1 associated RING domain 1 [Source:HGNC Symbol;Acc:HGNC:952]	39401	-1.75528	-0.0838441	Yes
row_196	CUL4A	cullin 4A [Source:HGNC Symbol;Acc:HGNC:2554]	39447	-1.80707	-0.065346	Yes
row_197	SLC7A5	solute carrier family 7 member 5 [Source:HGNC Symbol;Acc:HGNC:11063]	39616	-2.01597	-0.0476498	Yes
row_198	RPS6KA5	ribosomal protein S6 kinase A5 [Source:HGNC Symbol;Acc:HGNC:10434]	39969	-2.78661	-0.0261785	Yes
row_199	DMD	dystrophin [Source:HGNC Symbol;Acc:HGNC:2928]	40038	-3.0845	0.00561591	Yes

## Sheet: Epithelial_Mesenchymal
NAME	SYMBOL	TITLE	RANK IN GENE LIST	RANK METRIC SCORE	RUNNING ES	CORE ENRICHMENT
row_0	SNAI2	snail family transcriptional repressor 2 [Source:HGNC Symbol;Acc:HGNC:11094]	53	3.97881	0.0167643	No
row_1	FBN1	fibrillin 1 [Source:HGNC Symbol;Acc:HGNC:3603]	66	3.85883	0.0340065	No
row_2	COL5A2	collagen type V alpha 2 chain [Source:HGNC Symbol;Acc:HGNC:2210]	78	3.70436	0.0505715	No
row_3	SERPINE1	serpin family E member 1 [Source:HGNC Symbol;Acc:HGNC:8583]	84	3.58914	0.0667625	No
row_4	OXTR	oxytocin receptor [Source:HGNC Symbol;Acc:HGNC:8529]	111	3.39703	0.081556	No
row_5	FBLN5	fibulin 5 [Source:HGNC Symbol;Acc:HGNC:3602]	118	3.35527	0.0966589	No
row_6	INHBA	inhibin subunit beta A [Source:HGNC Symbol;Acc:HGNC:6066]	136	3.21687	0.110858	No
row_7	MMP14	matrix metallopeptidase 14 [Source:HGNC Symbol;Acc:HGNC:7160]	169	2.95824	0.123507	No
row_8	MGP	matrix Gla protein [Source:HGNC Symbol;Acc:HGNC:7060]	176	2.88585	0.136476	No
row_9	PMEPA1	prostate transmembrane protein, androgen induced 1 [Source:HGNC Symbol;Acc:HGNC:14107]	239	2.61926	0.146835	No
row_10	IL6	interleukin 6 [Source:HGNC Symbol;Acc:HGNC:6018]	357	2.23092	0.154056	No
row_11	CRLF1	cytokine receptor like factor 1 [Source:HGNC Symbol;Acc:HGNC:2364]	468	1.99731	0.16039	No
row_12	FBLN2	fibulin 2 [Source:HGNC Symbol;Acc:HGNC:3601]	522	1.8775	0.167602	No
row_13	ECM1	extracellular matrix protein 1 [Source:HGNC Symbol;Acc:HGNC:3153]	553	1.82086	0.175131	No
row_14	ITGA5	integrin subunit alpha 5 [Source:HGNC Symbol;Acc:HGNC:6141]	561	1.81436	0.183204	No
row_15	GPC1	glypican 1 [Source:HGNC Symbol;Acc:HGNC:4449]	619	1.72154	0.189607	No
row_16	SPARC	secreted protein acidic and cysteine rich [Source:HGNC Symbol;Acc:HGNC:11219]	652	1.6788	0.19644	No
row_17	NNMT	nicotinamide N-methyltransferase [Source:HGNC Symbol;Acc:HGNC:7861]	666	1.67518	0.203731	No
row_18	IGFBP3	insulin like growth factor binding protein 3 [Source:HGNC Symbol;Acc:HGNC:5472]	1029	1.33851	0.20078	No
row_19	RGS4	regulator of G protein signaling 4 [Source:HGNC Symbol;Acc:HGNC:10000]	1111	1.28386	0.204595	No
row_20	TGFB1	transforming growth factor beta 1 [Source:HGNC Symbol;Acc:HGNC:11766]	1141	1.26875	0.209638	No
row_21	PCOLCE2	procollagen C-endopeptidase enhancer 2 [Source:HGNC Symbol;Acc:HGNC:8739]	1178	1.24564	0.214402	No
row_22	PDLIM4	PDZ and LIM domain 4 [Source:HGNC Symbol;Acc:HGNC:16501]	1207	1.23178	0.219303	No
row_23	DAB2	DAB adaptor protein 2 [Source:HGNC Symbol;Acc:HGNC:2662]	1222	1.22563	0.224525	No
row_24	IL15	interleukin 15 [Source:HGNC Symbol;Acc:HGNC:5977]	1260	1.20776	0.229092	No
row_25	FMOD	fibromodulin [Source:HGNC Symbol;Acc:HGNC:3774]	1330	1.17513	0.232711	No
row_26	EDIL3	EGF like repeats and discoidin domains 3 [Source:HGNC Symbol;Acc:HGNC:3173]	1396	1.14778	0.236307	No
row_27	SFRP4	secreted frizzled related protein 4 [Source:HGNC Symbol;Acc:HGNC:10778]	1439	1.12604	0.240377	No
row_28	DST	dystonin [Source:HGNC Symbol;Acc:HGNC:1090]	1593	1.06433	0.241397	No
row_29	TNC	tenascin C [Source:HGNC Symbol;Acc:HGNC:5318]	1811	0.994118	0.240499	No
row_30	SAT1	spermidine/spermine N1-acetyltransferase 1 [Source:HGNC Symbol;Acc:HGNC:10540]	1946	0.963509	0.241535	No
row_31	ITGAV	integrin subunit alpha V [Source:HGNC Symbol;Acc:HGNC:6150]	1978	0.957666	0.245114	No
row_32	COLGALT1	collagen beta(1-O)galactosyltransferase 1 [Source:HGNC Symbol;Acc:HGNC:26182]	2072	0.927649	0.24701	No
row_33	ID2	inhibitor of DNA binding 2 [Source:HGNC Symbol;Acc:HGNC:5361]	2134	0.911599	0.249632	No
row_34	VEGFC	vascular endothelial growth factor C [Source:HGNC Symbol;Acc:HGNC:12682]	2703	0.827101	0.239214	No
row_35	LAMC1	laminin subunit gamma 1 [Source:HGNC Symbol;Acc:HGNC:6492]	2761	0.817339	0.241507	No
row_36	VIM	vimentin [Source:HGNC Symbol;Acc:HGNC:12692]	2867	0.805822	0.242549	No
row_37	COL5A1	collagen type V alpha 1 chain [Source:HGNC Symbol;Acc:HGNC:2209]	2959	0.786745	0.243854	No
row_38	FSTL3	follistatin like 3 [Source:HGNC Symbol;Acc:HGNC:3973]	2995	0.781701	0.246534	No
row_39	DPYSL3	dihydropyrimidinase like 3 [Source:HGNC Symbol;Acc:HGNC:3015]	3087	0.765967	0.247745	No
row_40	SLIT3	slit guidance ligand 3 [Source:HGNC Symbol;Acc:HGNC:11087]	3221	0.743979	0.247807	No
row_41	EMP3	epithelial membrane protein 3 [Source:HGNC Symbol;Acc:HGNC:3335]	3656	0.670179	0.240021	No
row_42	P3H1	prolyl 3-hydroxylase 1 [Source:HGNC Symbol;Acc:HGNC:19316]	3732	0.658123	0.241141	No
row_43	TNFRSF12A	TNF receptor superfamily member 12A [Source:HGNC Symbol;Acc:HGNC:18152]	3936	0.627953	0.238929	No
row_44	PLOD3	procollagen-lysine,2-oxoglutarate 5-dioxygenase 3 [Source:HGNC Symbol;Acc:HGNC:9083]	3977	0.622539	0.24076	No
row_45	LAMC2	laminin subunit gamma 2 [Source:HGNC Symbol;Acc:HGNC:6493]	4080	0.60965	0.240986	No
row_46	GADD45A	growth arrest and DNA damage inducible alpha [Source:HGNC Symbol;Acc:HGNC:4095]	4216	0.591042	0.240303	No
row_47	SERPINE2	serpin family E member 2 [Source:HGNC Symbol;Acc:HGNC:8951]	4351	0.573579	0.239566	No
row_48	WIPF1	WAS/WASL interacting protein family member 1 [Source:HGNC Symbol;Acc:HGNC:12736]	4358	0.572688	0.242019	No
row_49	COL16A1	collagen type XVI alpha 1 chain [Source:HGNC Symbol;Acc:HGNC:2193]	4806	0.523715	0.233243	No
row_50	PLOD2	procollagen-lysine,2-oxoglutarate 5-dioxygenase 2 [Source:HGNC Symbol;Acc:HGNC:9082]	4894	0.516446	0.233419	No
row_51	GREM1	gremlin 1, DAN family BMP antagonist [Source:HGNC Symbol;Acc:HGNC:2001]	5517	0.486812	0.220107	No
row_52	LOXL2	lysyl oxidase like 2 [Source:HGNC Symbol;Acc:HGNC:6666]	5928	0.447558	0.211908	No
row_53	TFPI2	tissue factor pathway inhibitor 2 [Source:HGNC Symbol;Acc:HGNC:11761]	6329	0.428955	0.203874	No
row_54	NID2	nidogen 2 [Source:HGNC Symbol;Acc:HGNC:13389]	6842	0.420874	0.193007	No
row_55	GPX7	glutathione peroxidase 7 [Source:HGNC Symbol;Acc:HGNC:4559]	7013	0.42082	0.190677	No
row_56	COL6A2	collagen type VI alpha 2 chain [Source:HGNC Symbol;Acc:HGNC:2212]	7354	0.406449	0.184038	No
row_57	CXCL8	C-X-C motif chemokine ligand 8 [Source:HGNC Symbol;Acc:HGNC:6025]	7642	0.383313	0.178617	No
row_58	CADM1	cell adhesion molecule 1 [Source:HGNC Symbol;Acc:HGNC:5951]	7711	0.378036	0.178639	No
row_59	COL3A1	collagen type III alpha 1 chain [Source:HGNC Symbol;Acc:HGNC:2201]	7971	0.355415	0.17379	No
row_60	TAGLN	transgelin [Source:HGNC Symbol;Acc:HGNC:11553]	8006	0.352193	0.174542	No
row_61	PCOLCE	procollagen C-endopeptidase enhancer [Source:HGNC Symbol;Acc:HGNC:8738]	8337	0.325235	0.167784	No
row_62	FN1	fibronectin 1 [Source:HGNC Symbol;Acc:HGNC:3778]	8451	0.316403	0.166402	No
row_63	SGCG	sarcoglycan gamma [Source:HGNC Symbol;Acc:HGNC:10809]	8800	0.289036	0.159029	No
row_64	BMP1	bone morphogenetic protein 1 [Source:HGNC Symbol;Acc:HGNC:1067]	8940	0.279689	0.156831	No
row_65	CALU	calumenin [Source:HGNC Symbol;Acc:HGNC:1458]	9009	0.276642	0.156392	No
row_66	QSOX1	quiescin sulfhydryl oxidase 1 [Source:HGNC Symbol;Acc:HGNC:9756]	9216	0.26135	0.152438	No
row_67	GEM	GTP binding protein overexpressed in skeletal muscle [Source:HGNC Symbol;Acc:HGNC:4234]	9381	0.250323	0.149482	No
row_68	ELN	elastin [Source:HGNC Symbol;Acc:HGNC:3327]	9445	0.245393	0.149025	No
row_69	COL6A3	collagen type VI alpha 3 chain [Source:HGNC Symbol;Acc:HGNC:2213]	9959	0.208115	0.137167	No
row_70	COL7A1	collagen type VII alpha 1 chain [Source:HGNC Symbol;Acc:HGNC:2214]	10183	0.192955	0.132478	No
row_71	ITGB1	integrin subunit beta 1 [Source:HGNC Symbol;Acc:HGNC:6153]	10554	0.173546	0.124032	No
row_72	IL32	interleukin 32 [Source:HGNC Symbol;Acc:HGNC:16830]	11054	0.143692	0.11223	No
row_73	ITGB5	integrin subunit beta 5 [Source:HGNC Symbol;Acc:HGNC:6160]	11498	0.115263	0.101697	No
row_74	PDGFRB	platelet derived growth factor receptor beta [Source:HGNC Symbol;Acc:HGNC:8804]	11707	0.101255	0.0969651	No
row_75	WNT5A	Wnt family member 5A [Source:HGNC Symbol;Acc:HGNC:12784]	11749	0.0986139	0.0963901	No
row_76	LRP1	LDL receptor related protein 1 [Source:HGNC Symbol;Acc:HGNC:6692]	11905	0.0902422	0.0929315	No
row_77	MSX1	msh homeobox 1 [Source:HGNC Symbol;Acc:HGNC:7391]	12267	0.0657816	0.0842199	No
row_78	CDH2	cadherin 2 [Source:HGNC Symbol;Acc:HGNC:1759]	12381	0.0580532	0.0816634	No
row_79	PPIB	peptidylprolyl isomerase B [Source:HGNC Symbol;Acc:HGNC:9255]	12715	0.033615	0.0735045	No
row_80	HTRA1	HtrA serine peptidase 1 [Source:HGNC Symbol;Acc:HGNC:9476]	12859	0.023413	0.0700416	No
row_81	CDH11	cadherin 11 [Source:HGNC Symbol;Acc:HGNC:1750]	12887	0.0211723	0.0694639	No
row_82	CAPG	capping actin protein, gelsolin like [Source:HGNC Symbol;Acc:HGNC:1474]	12969	0.0152667	0.0675116	No
row_83	DCN	decorin [Source:HGNC Symbol;Acc:HGNC:2705]	13578	0	0.0523359	No
row_84	FAP	fibroblast activation protein alpha [Source:HGNC Symbol;Acc:HGNC:3590]	13961	0	0.0428011	No
row_85	CXCL6	C-X-C motif chemokine ligand 6 [Source:HGNC Symbol;Acc:HGNC:10643]	15824	0	-0.00367453	No
row_86	MXRA5	matrix remodeling associated 5 [Source:HGNC Symbol;Acc:HGNC:7539]	17199	0	-0.0379697	No
row_87	TNFRSF11B	TNF receptor superfamily member 11b [Source:HGNC Symbol;Acc:HGNC:11909]	20599	0	-0.122809	No
row_88	FOXC2	forkhead box C2 [Source:HGNC Symbol;Acc:HGNC:3801]	22074	0	-0.1596	No
row_89	AREG	amphiregulin [Source:HGNC Symbol;Acc:HGNC:651]	23579	0	-0.19714	No
row_90	PRSS2	serine protease 2 [Source:HGNC Symbol;Acc:HGNC:9483]	24955	0	-0.23146	No
row_91	MFAP5	microfibril associated protein 5 [Source:HGNC Symbol;Acc:HGNC:29673]	25061	0	-0.234081	No
row_92	FSTL1	follistatin like 1 [Source:HGNC Symbol;Acc:HGNC:3972]	27853	-0.0565414	-0.303487	No
row_93	FUCA1	alpha-L-fucosidase 1 [Source:HGNC Symbol;Acc:HGNC:4006]	27950	-0.0638398	-0.305593	No
row_94	SDC1	syndecan 1 [Source:HGNC Symbol;Acc:HGNC:10658]	27991	-0.0673363	-0.306286	No
row_95	TNFAIP3	TNF alpha induced protein 3 [Source:HGNC Symbol;Acc:HGNC:11896]	28017	-0.0693412	-0.306594	No
row_96	TPM2	tropomyosin 2 [Source:HGNC Symbol;Acc:HGNC:12011]	28031	-0.0705729	-0.306598	No
row_97	ADAM12	ADAM metallopeptidase domain 12 [Source:HGNC Symbol;Acc:HGNC:190]	28536	-0.10848	-0.318685	No
row_98	PFN2	profilin 2 [Source:HGNC Symbol;Acc:HGNC:8882]	28636	-0.115544	-0.320631	No
row_99	JUN	Jun proto-oncogene, AP-1 transcription factor subunit [Source:HGNC Symbol;Acc:HGNC:6204]	28814	-0.127209	-0.32447	No
row_100	ITGA2	integrin subunit alpha 2 [Source:HGNC Symbol;Acc:HGNC:6137]	28839	-0.128429	-0.324485	No
row_101	PVR	PVR cell adhesion molecule [Source:HGNC Symbol;Acc:HGNC:9705]	29307	-0.159379	-0.335417	No
row_102	PLOD1	procollagen-lysine,2-oxoglutarate 5-dioxygenase 1 [Source:HGNC Symbol;Acc:HGNC:9081]	29656	-0.183558	-0.343269	No
row_103	GADD45B	growth arrest and DNA damage inducible beta [Source:HGNC Symbol;Acc:HGNC:4096]	29708	-0.186176	-0.343696	No
row_104	NOTCH2	notch receptor 2 [Source:HGNC Symbol;Acc:HGNC:7882]	29723	-0.187291	-0.343194	No
row_105	CTHRC1	collagen triple helix repeat containing 1 [Source:HGNC Symbol;Acc:HGNC:18831]	29845	-0.195562	-0.345325	No
row_106	CXCL1	C-X-C motif chemokine ligand 1 [Source:HGNC Symbol;Acc:HGNC:4602]	30028	-0.207819	-0.348923	No
row_107	BDNF	brain derived neurotrophic factor [Source:HGNC Symbol;Acc:HGNC:1033]	30200	-0.217919	-0.3522	No
row_108	MCM7	minichromosome maintenance complex component 7 [Source:HGNC Symbol;Acc:HGNC:6950]	30245	-0.220882	-0.352295	No
row_109	TPM4	tropomyosin 4 [Source:HGNC Symbol;Acc:HGNC:12013]	30511	-0.238054	-0.357827	No
row_110	COPA	COPI coat complex subunit alpha [Source:HGNC Symbol;Acc:HGNC:2230]	30512	-0.238185	-0.356744	No
row_111	LGALS1	galectin 1 [Source:HGNC Symbol;Acc:HGNC:6561]	30821	-0.261553	-0.363243	No
row_112	APLP1	amyloid beta precursor like protein 1 [Source:HGNC Symbol;Acc:HGNC:597]	30825	-0.261966	-0.362127	No
row_113	CD59	CD59 molecule (CD59 blood group) [Source:HGNC Symbol;Acc:HGNC:1689]	30919	-0.268754	-0.363226	No
row_114	LRRC15	leucine rich repeat containing 15 [Source:HGNC Symbol;Acc:HGNC:20818]	31047	-0.280365	-0.365122	No
row_115	SGCB	sarcoglycan beta [Source:HGNC Symbol;Acc:HGNC:10806]	31292	-0.297201	-0.369861	No
row_116	MMP1	matrix metallopeptidase 1 [Source:HGNC Symbol;Acc:HGNC:7155]	31434	-0.306409	-0.371987	No
row_117	MATN3	matrilin 3 [Source:HGNC Symbol;Acc:HGNC:6909]	32312	-0.382442	-0.392139	No
row_118	FERMT2	fermitin family member 2 [Source:HGNC Symbol;Acc:HGNC:15767]	32350	-0.385456	-0.39131	No
row_119	CXCL12	C-X-C motif chemokine ligand 12 [Source:HGNC Symbol;Acc:HGNC:10672]	32792	-0.426184	-0.40038	No
row_120	SGCD	sarcoglycan delta [Source:HGNC Symbol;Acc:HGNC:10807]	33059	-0.426184	-0.405082	No
row_121	COL4A1	collagen type IV alpha 1 chain [Source:HGNC Symbol;Acc:HGNC:2202]	33136	-0.426224	-0.405042	No
row_122	LUM	lumican [Source:HGNC Symbol;Acc:HGNC:6724]	33229	-0.430323	-0.405382	No
row_123	MYL9	myosin light chain 9 [Source:HGNC Symbol;Acc:HGNC:15754]	33740	-0.435529	-0.416131	No
row_124	LOXL1	lysyl oxidase like 1 [Source:HGNC Symbol;Acc:HGNC:6665]	34019	-0.441623	-0.421063	No
row_125	EFEMP2	EGF containing fibulin extracellular matrix protein 2 [Source:HGNC Symbol;Acc:HGNC:3219]	34271	-0.466539	-0.425207	No
row_126	CAP2	cyclase associated actin cytoskeleton regulatory protein 2 [Source:HGNC Symbol;Acc:HGNC:20039]	34406	-0.480811	-0.426366	No
row_127	ECM2	extracellular matrix protein 2 [Source:HGNC Symbol;Acc:HGNC:3154]	34409	-0.48127	-0.424228	No
row_128	TGFBI	transforming growth factor beta induced [Source:HGNC Symbol;Acc:HGNC:11771]	34876	-0.497792	-0.433597	No
row_129	MATN2	matrilin 2 [Source:HGNC Symbol;Acc:HGNC:6908]	35262	-0.530335	-0.440795	No
row_130	FBN2	fibrillin 2 [Source:HGNC Symbol;Acc:HGNC:3604]	35387	-0.542496	-0.441424	No
row_131	THBS2	thrombospondin 2 [Source:HGNC Symbol;Acc:HGNC:11786]	35574	-0.57265	-0.443464	No
row_132	COL1A1	collagen type I alpha 1 chain [Source:HGNC Symbol;Acc:HGNC:2197]	36083	-0.649563	-0.45319	No
row_133	MMP3	matrix metallopeptidase 3 [Source:HGNC Symbol;Acc:HGNC:7173]	36125	-0.655538	-0.451234	No
row_134	COMP	cartilage oligomeric matrix protein [Source:HGNC Symbol;Acc:HGNC:2227]	36188	-0.666416	-0.449752	No
row_135	PRRX1	paired related homeobox 1 [Source:HGNC Symbol;Acc:HGNC:9142]	36588	-0.740659	-0.456344	No
row_136	LAMA1	laminin subunit alpha 1 [Source:HGNC Symbol;Acc:HGNC:6481]	36589	-0.740728	-0.452977	No
row_137	POSTN	periostin [Source:HGNC Symbol;Acc:HGNC:16953]	36806	-0.778876	-0.454827	No
row_138	TIMP1	TIMP metallopeptidase inhibitor 1 [Source:HGNC Symbol;Acc:HGNC:11820]	36833	-0.785021	-0.451908	No
row_139	NT5E	5'-nucleotidase ecto [Source:HGNC Symbol;Acc:HGNC:8021]	36966	-0.816091	-0.451493	No
row_140	BGN	biglycan [Source:HGNC Symbol;Acc:HGNC:1044]	37076	-0.829357	-0.450443	No
row_141	ITGB3	integrin subunit beta 3 [Source:HGNC Symbol;Acc:HGNC:6156]	37559	-0.884472	-0.458453	No
row_142	COL4A2	collagen type IV alpha 2 chain [Source:HGNC Symbol;Acc:HGNC:2203]	37890	-0.962002	-0.462317	Yes
row_143	NTM	neurotrimin [Source:HGNC Symbol;Acc:HGNC:17941]	37978	-0.984814	-0.460012	Yes
row_144	ANPEP	alanyl aminopeptidase, membrane [Source:HGNC Symbol;Acc:HGNC:500]	38038	-0.998	-0.456948	Yes
row_145	TPM1	tropomyosin 1 [Source:HGNC Symbol;Acc:HGNC:12010]	38049	-1.00181	-0.452643	Yes
row_146	PTX3	pentraxin 3 [Source:HGNC Symbol;Acc:HGNC:9692]	38114	-1.02568	-0.449578	Yes
row_147	PMP22	peripheral myelin protein 22 [Source:HGNC Symbol;Acc:HGNC:9118]	38277	-1.08978	-0.448667	Yes
row_148	SLC6A8	solute carrier family 6 member 8 [Source:HGNC Symbol;Acc:HGNC:11055]	38467	-1.16743	-0.448078	Yes
row_149	CALD1	caldesmon 1 [Source:HGNC Symbol;Acc:HGNC:1441]	38490	-1.17614	-0.44328	Yes
row_150	GLIPR1	GLI pathogenesis related 1 [Source:HGNC Symbol;Acc:HGNC:17001]	38635	-1.24051	-0.441235	Yes
row_151	MMP2	matrix metallopeptidase 2 [Source:HGNC Symbol;Acc:HGNC:7166]	38684	-1.26026	-0.436705	Yes
row_152	THY1	Thy-1 cell surface antigen [Source:HGNC Symbol;Acc:HGNC:11801]	38686	-1.26212	-0.430992	Yes
row_153	SNTB1	syntrophin beta 1 [Source:HGNC Symbol;Acc:HGNC:11168]	38754	-1.29914	-0.426759	Yes
row_154	SPP1	secreted phosphoprotein 1 [Source:HGNC Symbol;Acc:HGNC:11255]	38760	-1.30448	-0.420953	Yes
row_155	TGFBR3	transforming growth factor beta receptor 3 [Source:HGNC Symbol;Acc:HGNC:11774]	38780	-1.31389	-0.415455	Yes
row_156	PTHLH	parathyroid hormone like hormone [Source:HGNC Symbol;Acc:HGNC:9607]	38786	-1.31672	-0.409594	Yes
row_157	LOX	lysyl oxidase [Source:HGNC Symbol;Acc:HGNC:6664]	38833	-1.35454	-0.404585	Yes
row_158	MAGEE1	MAGE family member E1 [Source:HGNC Symbol;Acc:HGNC:24934]	38884	-1.37207	-0.399595	Yes
row_159	PLAUR	plasminogen activator, urokinase receptor [Source:HGNC Symbol;Acc:HGNC:9053]	38887	-1.37466	-0.393396	Yes
row_160	FZD8	frizzled class receptor 8 [Source:HGNC Symbol;Acc:HGNC:4046]	38964	-1.42505	-0.388815	Yes
row_161	RHOB	ras homolog family member B [Source:HGNC Symbol;Acc:HGNC:668]	38999	-1.44919	-0.383076	Yes
row_162	SFRP1	secreted frizzled related protein 1 [Source:HGNC Symbol;Acc:HGNC:10776]	39022	-1.46378	-0.376971	Yes
row_163	SLIT2	slit guidance ligand 2 [Source:HGNC Symbol;Acc:HGNC:11086]	39067	-1.48847	-0.371303	Yes
row_164	FGF2	fibroblast growth factor 2 [Source:HGNC Symbol;Acc:HGNC:3676]	39101	-1.52193	-0.365208	Yes
row_165	LAMA3	laminin subunit alpha 3 [Source:HGNC Symbol;Acc:HGNC:6483]	39145	-1.54704	-0.359249	Yes
row_166	COL1A2	collagen type I alpha 2 chain [Source:HGNC Symbol;Acc:HGNC:2198]	39153	-1.55285	-0.352364	Yes
row_167	ENO2	enolase 2 [Source:HGNC Symbol;Acc:HGNC:3353]	39155	-1.55521	-0.345319	Yes
row_168	SERPINH1	serpin family H member 1 [Source:HGNC Symbol;Acc:HGNC:1546]	39178	-1.57461	-0.338711	Yes
row_169	FLNA	filamin A [Source:HGNC Symbol;Acc:HGNC:3754]	39199	-1.58784	-0.331992	Yes
row_170	CCN2	cellular communication network factor 2 [Source:HGNC Symbol;Acc:HGNC:2500]	39271	-1.65016	-0.326262	Yes
row_171	VEGFA	vascular endothelial growth factor A [Source:HGNC Symbol;Acc:HGNC:12680]	39331	-1.70429	-0.319988	Yes
row_172	SDC4	syndecan 4 [Source:HGNC Symbol;Acc:HGNC:10661]	39340	-1.71084	-0.31241	Yes
row_173	TGM2	transglutaminase 2 [Source:HGNC Symbol;Acc:HGNC:11778]	39399	-1.75172	-0.305895	Yes
row_174	COL8A2	collagen type VIII alpha 2 chain [Source:HGNC Symbol;Acc:HGNC:2216]	39420	-1.77474	-0.298326	Yes
row_175	GJA1	gap junction protein alpha 1 [Source:HGNC Symbol;Acc:HGNC:4274]	39518	-1.86433	-0.292272	Yes
row_176	ABI3BP	ABI family member 3 binding protein [Source:HGNC Symbol;Acc:HGNC:17265]	39540	-1.91122	-0.284108	Yes
row_177	MEST	mesoderm specific transcript [Source:HGNC Symbol;Acc:HGNC:7028]	39542	-1.91214	-0.275441	Yes
row_178	VCAM1	vascular cell adhesion molecule 1 [Source:HGNC Symbol;Acc:HGNC:12663]	39561	-1.93343	-0.267101	Yes
row_179	CCN1	cellular communication network factor 1 [Source:HGNC Symbol;Acc:HGNC:2654]	39659	-2.07653	-0.260082	Yes
row_180	IGFBP2	insulin like growth factor binding protein 2 [Source:HGNC Symbol;Acc:HGNC:5471]	39662	-2.08001	-0.250677	Yes
row_181	COL11A1	collagen type XI alpha 1 chain [Source:HGNC Symbol;Acc:HGNC:2186]	39687	-2.1197	-0.24164	Yes
row_182	GAS1	growth arrest specific 1 [Source:HGNC Symbol;Acc:HGNC:4165]	39731	-2.19196	-0.232749	Yes
row_183	MYLK	myosin light chain kinase [Source:HGNC Symbol;Acc:HGNC:7590]	39757	-2.25703	-0.223113	Yes
row_184	COL12A1	collagen type XII alpha 1 chain [Source:HGNC Symbol;Acc:HGNC:2188]	39830	-2.42334	-0.213894	Yes
row_185	ACTA2	actin alpha 2, smooth muscle [Source:HGNC Symbol;Acc:HGNC:130]	39844	-2.43887	-0.203131	Yes
row_186	THBS1	thrombospondin 1 [Source:HGNC Symbol;Acc:HGNC:11785]	39938	-2.6863	-0.193241	Yes
row_187	DKK1	dickkopf WNT signaling pathway inhibitor 1 [Source:HGNC Symbol;Acc:HGNC:2891]	39990	-2.87068	-0.181464	Yes
row_188	VCAN	versican [Source:HGNC Symbol;Acc:HGNC:2464]	40030	-3.05713	-0.16854	Yes
row_189	SCG2	secretogranin II [Source:HGNC Symbol;Acc:HGNC:10575]	40034	-3.06569	-0.154679	Yes
row_190	FAS	Fas cell surface death receptor [Source:HGNC Symbol;Acc:HGNC:11920]	40046	-3.1213	-0.140765	Yes
row_191	FBLN1	fibulin 1 [Source:HGNC Symbol;Acc:HGNC:3600]	40056	-3.16184	-0.126616	Yes
row_192	LAMA2	laminin subunit alpha 2 [Source:HGNC Symbol;Acc:HGNC:6482]	40063	-3.2301	-0.112082	Yes
row_193	TIMP3	TIMP metallopeptidase inhibitor 3 [Source:HGNC Symbol;Acc:HGNC:11822]	40072	-3.26413	-0.0974433	Yes
row_194	IGFBP4	insulin like growth factor binding protein 4 [Source:HGNC Symbol;Acc:HGNC:5473]	40092	-3.37548	-0.082573	Yes
row_195	COL5A3	collagen type V alpha 3 chain [Source:HGNC Symbol;Acc:HGNC:14864]	40115	-3.49953	-0.0672137	Yes
row_196	CDH6	cadherin 6 [Source:HGNC Symbol;Acc:HGNC:1765]	40126	-3.59298	-0.0511301	Yes
row_197	BASP1	brain abundant membrane attached signal protein 1 [Source:HGNC Symbol;Acc:HGNC:957]	40136	-3.6807	-0.0346228	Yes
row_198	SPOCK1	SPARC (osteonectin), cwcv and kazal like domains proteoglycan 1 [Source:HGNC Symbol;Acc:HGNC:11251]	40145	-3.75059	-0.0177727	Yes
row_199	CD44	CD44 molecule (Indian blood group) [Source:HGNC Symbol;Acc:HGNC:1681]	40226	-4.55202	0.000923387	Yes

## Sheet: Hedgehog_Signaling
NAME	SYMBOL	TITLE	RANK IN GENE LIST	RANK METRIC SCORE	RUNNING ES	CORE ENRICHMENT
row_0	RTN1	reticulon 1 [Source:HGNC Symbol;Acc:HGNC:10467]	224	2.67417	0.0521697	No
row_1	GLI1	GLI family zinc finger 1 [Source:HGNC Symbol;Acc:HGNC:4317]	258	2.55847	0.106589	No
row_2	NRP2	neuropilin 2 [Source:HGNC Symbol;Acc:HGNC:8005]	498	1.93468	0.14242	No
row_3	CDK6	cyclin dependent kinase 6 [Source:HGNC Symbol;Acc:HGNC:1777]	514	1.89203	0.182898	No
row_4	OPHN1	oligophrenin 1 [Source:HGNC Symbol;Acc:HGNC:8148]	2233	0.879787	0.159187	No
row_5	HEY1	hes related family bHLH transcription factor with YRPW motif 1 [Source:HGNC Symbol;Acc:HGNC:4880]	2419	0.850205	0.172944	No
row_6	NKX6-1	NK6 homeobox 1 [Source:HGNC Symbol;Acc:HGNC:7839]	2741	0.820736	0.182685	No
row_7	HEY2	hes related family bHLH transcription factor with YRPW motif 2 [Source:HGNC Symbol;Acc:HGNC:4881]	3152	0.756503	0.188827	No
row_8	PML	PML nuclear body scaffold [Source:HGNC Symbol;Acc:HGNC:9113]	9808	0.219064	0.028125	No
row_9	SHH	sonic hedgehog signaling molecule [Source:HGNC Symbol;Acc:HGNC:10848]	27350	-0.0306465	-0.407253	No
row_10	TLE3	TLE family member 3, transcriptional corepressor [Source:HGNC Symbol;Acc:HGNC:11839]	28695	-0.119288	-0.438087	No
row_11	ADGRG1	adhesion G protein-coupled receptor G1 [Source:HGNC Symbol;Acc:HGNC:4512]	30082	-0.210958	-0.467986	No
row_12	NF1	neurofibromin 1 [Source:HGNC Symbol;Acc:HGNC:7765]	30682	-0.25152	-0.477445	No
row_13	NRP1	neuropilin 1 [Source:HGNC Symbol;Acc:HGNC:8004]	31456	-0.307163	-0.490029	No
row_14	SLIT1	slit guidance ligand 1 [Source:HGNC Symbol;Acc:HGNC:11085]	31518	-0.312773	-0.484792	No
row_15	RASA1	RAS p21 protein activator 1 [Source:HGNC Symbol;Acc:HGNC:9871]	31719	-0.32774	-0.482688	No
row_16	PLG	plasminogen [Source:HGNC Symbol;Acc:HGNC:9071]	32401	-0.390367	-0.491188	No
row_17	ACHE	acetylcholinesterase (Cartwright blood group) [Source:HGNC Symbol;Acc:HGNC:108]	35757	-0.599259	-0.561649	No
row_18	PTCH1	patched 1 [Source:HGNC Symbol;Acc:HGNC:9585]	35892	-0.619353	-0.551607	No
row_19	LDB1	LIM domain binding 1 [Source:HGNC Symbol;Acc:HGNC:6532]	37408	-0.861308	-0.570671	Yes
row_20	CDK5R1	cyclin dependent kinase 5 regulatory subunit 1 [Source:HGNC Symbol;Acc:HGNC:1775]	37573	-0.887666	-0.555582	Yes
row_21	DPYSL2	dihydropyrimidinase like 2 [Source:HGNC Symbol;Acc:HGNC:3014]	37841	-0.95192	-0.541667	Yes
row_22	TLE1	TLE family member 1, transcriptional corepressor [Source:HGNC Symbol;Acc:HGNC:11837]	38281	-1.0924	-0.528993	Yes
row_23	CRMP1	collapsin response mediator protein 1 [Source:HGNC Symbol;Acc:HGNC:2365]	38483	-1.17368	-0.508649	Yes
row_24	THY1	Thy-1 cell surface antigen [Source:HGNC Symbol;Acc:HGNC:11801]	38686	-1.26212	-0.48642	Yes
row_25	ETS2	ETS proto-oncogene 2, transcription factor [Source:HGNC Symbol;Acc:HGNC:3489]	38814	-1.34091	-0.460625	Yes
row_26	UNC5C	unc-5 netrin receptor C [Source:HGNC Symbol;Acc:HGNC:12569]	38905	-1.38479	-0.432964	Yes
row_27	NRCAM	neuronal cell adhesion molecule [Source:HGNC Symbol;Acc:HGNC:7994]	39126	-1.538	-0.405226	Yes
row_28	VEGFA	vascular endothelial growth factor A [Source:HGNC Symbol;Acc:HGNC:12680]	39331	-1.70429	-0.373499	Yes
row_29	AMOT	angiomotin [Source:HGNC Symbol;Acc:HGNC:17810]	39344	-1.71809	-0.336702	Yes
row_30	MYH9	myosin heavy chain 9 [Source:HGNC Symbol;Acc:HGNC:7579]	39412	-1.76478	-0.300265	Yes
row_31	L1CAM	L1 cell adhesion molecule [Source:HGNC Symbol;Acc:HGNC:6470]	39721	-2.16495	-0.261178	Yes
row_32	CELSR1	cadherin EGF LAG seven-pass G-type receptor 1 [Source:HGNC Symbol;Acc:HGNC:1850]	39945	-2.69911	-0.208445	Yes
row_33	VLDLR	very low density lipoprotein receptor [Source:HGNC Symbol;Acc:HGNC:12698]	40003	-2.92206	-0.146771	Yes
row_34	SCG2	secretogranin II [Source:HGNC Symbol;Acc:HGNC:10575]	40034	-3.06569	-0.0813259	Yes
row_35	CNTFR	ciliary neurotrophic factor receptor [Source:HGNC Symbol;Acc:HGNC:2170]	40178	-4.02916	0.00211296	Yes

[truncated: 6 more sheets: Apical Junction, Androgen_Response, Apoptosis, Mitotic_Spindles, E2F_Targets, Myogenesis]
