# Supplementary material for: CD44 Depletion in Glioblastoma Cells Suppresses Growth and Stemness and Induces Senescence
Source: Cancers (Basel). 2022 Jul 31;14(15):3747. doi: 10.3390/cancers14153747 (PMC9367353; doi:10.3390/cancers14153747)
Supplement: Supplementary file 1 [file cancers-14-03747-s001.zip › Table S4_Hallmarks_DAPT_vs_Parental.xlsx]

## Sheet: HALLMARKS
NAME	SIZE	ES	NES	NOM p-val	FDR q-val	FWER p-val	RANK AT MAX
HALLMARK_E2F_TARGETS	200	-0.812006	-2.74334	0	0	0	4117
HALLMARK_G2M_CHECKPOINT	200	-0.774086	-2.62813	0	0	0	3186
HALLMARK_MTORC1_SIGNALING	200	-0.692971	-2.32351	0	0	0	4918
HALLMARK_GLYCOLYSIS	200	-0.656688	-2.25259	0	0	0	4123
HALLMARK_HYPOXIA	200	-0.649429	-2.20493	0	0	0	4169
HALLMARK_MYC_TARGETS_V1	200	-0.629299	-2.14385	0	0	0	9359
HALLMARK_TNFA_SIGNALING_VIA_NFKB	200	-0.613716	-2.0763	0	0	0	4347
HALLMARK_MITOTIC_SPINDLE	199	-0.59132	-2.00371	0	0	0	3963
HALLMARK_ESTROGEN_RESPONSE_LATE	200	-0.581626	-1.98027	0	0	0	3618
HALLMARK_OXIDATIVE_PHOSPHORYLATION	200	-0.58095	-1.95874	0	0	0	10248
HALLMARK_UV_RESPONSE_UP	158	-0.575752	-1.89204	0	0.000215311	0.001	4384
HALLMARK_CHOLESTEROL_HOMEOSTASIS	74	-0.63366	-1.87734	0	0.000197368	0.001	4404
HALLMARK_INFLAMMATORY_RESPONSE	200	-0.552227	-1.86984	0	0.000182186	0.001	5479
HALLMARK_INTERFERON_ALPHA_RESPONSE	97	-0.5952	-1.84162	0	0.000322234	0.002	6627
HALLMARK_ESTROGEN_RESPONSE_EARLY	200	-0.522857	-1.77101	0	0.000562095	0.004	3618
HALLMARK_UV_RESPONSE_DN	144	-0.53887	-1.76036	0	0.000660893	0.005	3958
HALLMARK_IL6_JAK_STAT3_SIGNALING	87	-0.561142	-1.73275	0	0.000838193	0.007	5666
HALLMARK_UNFOLDED_PROTEIN_RESPONSE	113	-0.54888	-1.71659	0	0.000980373	0.009	9652
HALLMARK_IL2_STAT5_SIGNALING	199	-0.501979	-1.70139	0	0.00110445	0.011	4114
HALLMARK_ANGIOGENESIS	36	-0.650551	-1.69423	0.00613497	0.00113923	0.012	3215
HALLMARK_ANDROGEN_RESPONSE	100	-0.547825	-1.69409	0	0.00108498	0.012	3983
HALLMARK_ADIPOGENESIS	200	-0.497605	-1.67812	0	0.00112864	0.013	8465
HALLMARK_REACTIVE_OXYGEN_SPECIES_PATHWAY	49	-0.603498	-1.66896	0	0.00116463	0.014	8039
HALLMARK_EPITHELIAL_MESENCHYMAL_TRANSITION	200	-0.49112	-1.66864	0	0.00111611	0.014	3705
HALLMARK_INTERFERON_GAMMA_RESPONSE	200	-0.482294	-1.61393	0	0.00233362	0.03	5680
HALLMARK_SPERMATOGENESIS	135	-0.49471	-1.59808	0	0.00289291	0.038	3560
HALLMARK_APOPTOSIS	161	-0.481645	-1.57524	0.004329	0.00320099	0.043	4022
HALLMARK_PROTEIN_SECRETION	96	-0.516957	-1.57304	0.00217865	0.00308667	0.043	9632
HALLMARK_MYC_TARGETS_V2	58	-0.557326	-1.56565	0.00814664	0.00319747	0.046	7258
HALLMARK_P53_PATHWAY	200	-0.461383	-1.55494	0	0.00347063	0.052	5326
HALLMARK_APICAL_JUNCTION	200	-0.461139	-1.54637	0	0.00367427	0.057	5440
HALLMARK_HEME_METABOLISM	200	-0.442779	-1.49468	0	0.0064036	0.101	7112
HALLMARK_NOTCH_SIGNALING	32	-0.575911	-1.45837	0.034413	0.00890187	0.141	2780
HALLMARK_DNA_REPAIR	150	-0.424718	-1.3843	0.0133038	0.0203229	0.298	8658
HALLMARK_PI3K_AKT_MTOR_SIGNALING	105	-0.437026	-1.37124	0.0195652	0.0230289	0.339	8583
HALLMARK_ALLOGRAFT_REJECTION	200	-0.392381	-1.33689	0.0126582	0.0328198	0.465	5242
HALLMARK_FATTY_ACID_METABOLISM	158	-0.404667	-1.33552	0.0110132	0.0324374	0.47	8636
HALLMARK_PEROXISOME	104	-0.423738	-1.32846	0.0273684	0.0343113	0.492	7837
HALLMARK_KRAS_SIGNALING_UP	200	-0.365882	-1.23464	0.0581655	0.08277	0.832	2759
HALLMARK_BILE_ACID_METABOLISM	112	-0.381849	-1.20155	0.104255	0.108832	0.909	7671
HALLMARK_MYOGENESIS	200	-0.346443	-1.18339	0.0757576	0.125148	0.938	3853
HALLMARK_COMPLEMENT	200	-0.347562	-1.1575	0.112527	0.151409	0.963	5662
HALLMARK_XENOBIOTIC_METABOLISM	200	-0.29456	-0.992641	0.435789	0.479175	1	7780
HALLMARK_APICAL_SURFACE	44	-0.347483	-0.949827	0.514463	0.594525	1	3814
HALLMARK_WNT_BETA_CATENIN_SIGNALING	42	-0.283564	-0.76435	0.886555	0.974342	1	3929

## Sheet: E2F_Targets
SYMBOL	TITLE	RANK IN GENE LIST	RANK METRIC SCORE	RUNNING ES	CORE ENRICHMENT
PDS5B	PDS5 cohesin associated factor B [Source:HGNC Symbol;Acc:HGNC:20418]	5262	0.502742	-0.131758	No
STAG1	stromal antigen 1 [Source:HGNC Symbol;Acc:HGNC:11354]	6286	0.441335	-0.155697	No
HMGB3	high mobility group box 3 [Source:HGNC Symbol;Acc:HGNC:5004]	6369	0.433414	-0.155674	No
PAN2	poly(A) specific ribonuclease subunit PAN2 [Source:HGNC Symbol;Acc:HGNC:20074]	7096	0.403221	-0.172224	No
RAD50	RAD50 double strand break repair protein [Source:HGNC Symbol;Acc:HGNC:9816]	7643	0.380032	-0.184296	No
ASF1A	anti-silencing function 1A histone chaperone [Source:HGNC Symbol;Acc:HGNC:20995]	7658	0.378807	-0.182805	No
NASP	nuclear autoantigenic sperm protein [Source:HGNC Symbol;Acc:HGNC:7644]	7721	0.373666	-0.182564	No
CDKN1B	cyclin dependent kinase inhibitor 1B [Source:HGNC Symbol;Acc:HGNC:1785]	7872	0.361546	-0.184626	No
CTCF	CCCTC-binding factor [Source:HGNC Symbol;Acc:HGNC:13723]	8166	0.335569	-0.190462	No
TP53	tumor protein p53 [Source:HGNC Symbol;Acc:HGNC:11998]	8721	0.293462	-0.20316	No
LUC7L3	LUC7 like 3 pre-mRNA splicing factor [Source:HGNC Symbol;Acc:HGNC:24309]	10404	0.241171	-0.244884	No
BRMS1L	BRMS1 like transcriptional repressor [Source:HGNC Symbol;Acc:HGNC:20512]	10678	0.223187	-0.250758	No
ORC2	origin recognition complex subunit 2 [Source:HGNC Symbol;Acc:HGNC:8488]	11159	0.19171	-0.262066	No
STMN1	stathmin 1 [Source:HGNC Symbol;Acc:HGNC:6510]	11769	0.152518	-0.276855	No
MSH2	mutS homolog 2 [Source:HGNC Symbol;Acc:HGNC:7325]	12020	0.138345	-0.282556	No
ING3	inhibitor of growth family member 3 [Source:HGNC Symbol;Acc:HGNC:14587]	12240	0.12558	-0.287529	No
NAP1L1	nucleosome assembly protein 1 like 1 [Source:HGNC Symbol;Acc:HGNC:7637]	12257	0.124495	-0.28733	No
PPP1R8	protein phosphatase 1 regulatory subunit 8 [Source:HGNC Symbol;Acc:HGNC:9296]	12534	0.107365	-0.293846	No
NOP56	NOP56 ribonucleoprotein [Source:HGNC Symbol;Acc:HGNC:15911]	13001	0.0815519	-0.305333	No
NUP107	nucleoporin 107 [Source:HGNC Symbol;Acc:HGNC:29914]	13008	0.0811206	-0.305091	No
PMS2	PMS1 homolog 2, mismatch repair system component [Source:HGNC Symbol;Acc:HGNC:9122]	13762	0.0384354	-0.324109	No
PNN	pinin, desmosome associated protein [Source:HGNC Symbol;Acc:HGNC:9162]	14195	0.0135244	-0.335061	No
CDKN2C	cyclin dependent kinase inhibitor 2C [Source:HGNC Symbol;Acc:HGNC:1789]	17187	0	-0.411349	No
CDKN2A	cyclin dependent kinase inhibitor 2A [Source:HGNC Symbol;Acc:HGNC:1787]	17188	0	-0.411349	No
WEE1	WEE1 G2 checkpoint kinase [Source:HGNC Symbol;Acc:HGNC:12761]	27304	-0.0315841	-0.669184	No
SRSF2	serine and arginine rich splicing factor 2 [Source:HGNC Symbol;Acc:HGNC:10783]	27331	-0.033276	-0.669685	No
ILF3	interleukin enhancer binding factor 3 [Source:HGNC Symbol;Acc:HGNC:6038]	27438	-0.040098	-0.672193	No
RAD1	RAD1 checkpoint DNA exonuclease [Source:HGNC Symbol;Acc:HGNC:9806]	27600	-0.0488994	-0.676061	No
TRA2B	transformer 2 beta homolog [Source:HGNC Symbol;Acc:HGNC:10781]	27870	-0.062356	-0.682618	No
MLH1	mutL homolog 1 [Source:HGNC Symbol;Acc:HGNC:7127]	27905	-0.0646649	-0.68317	No
NUP153	nucleoporin 153 [Source:HGNC Symbol;Acc:HGNC:8062]	28195	-0.0783315	-0.690159	No
SRSF1	serine and arginine rich splicing factor 1 [Source:HGNC Symbol;Acc:HGNC:10780]	28226	-0.0802349	-0.690532	No
PPM1D	protein phosphatase, Mg2+/Mn2+ dependent 1D [Source:HGNC Symbol;Acc:HGNC:9277]	28240	-0.0813223	-0.690467	No
SYNCRIP	synaptotagmin binding cytoplasmic RNA interacting protein [Source:HGNC Symbol;Acc:HGNC:16918]	28450	-0.0918349	-0.69535	No
SMC6	structural maintenance of chromosomes 6 [Source:HGNC Symbol;Acc:HGNC:20466]	28496	-0.0931801	-0.696043	No
NBN	nibrin [Source:HGNC Symbol;Acc:HGNC:7652]	28575	-0.097497	-0.697557	No
CNOT9	CCR4-NOT transcription complex subunit 9 [Source:HGNC Symbol;Acc:HGNC:10445]	28866	-0.115076	-0.704392	No
HNRNPD	heterogeneous nuclear ribonucleoprotein D [Source:HGNC Symbol;Acc:HGNC:5036]	28917	-0.117999	-0.705092	No
CDK4	cyclin dependent kinase 4 [Source:HGNC Symbol;Acc:HGNC:1773]	29006	-0.122394	-0.706739	No
MRE11	MRE11 homolog, double strand break repair nuclease [Source:HGNC Symbol;Acc:HGNC:7230]	29036	-0.124208	-0.706873	No
SHMT1	serine hydroxymethyltransferase 1 [Source:HGNC Symbol;Acc:HGNC:10850]	29278	-0.140153	-0.712336	No
PRKDC	protein kinase, DNA-activated, catalytic subunit [Source:HGNC Symbol;Acc:HGNC:9413]	29452	-0.151238	-0.71601	No
TBRG4	transforming growth factor beta regulator 4 [Source:HGNC Symbol;Acc:HGNC:17443]	29505	-0.154878	-0.716581	No
POLA2	DNA polymerase alpha 2, accessory subunit [Source:HGNC Symbol;Acc:HGNC:30073]	29863	-0.175074	-0.724832	No
EXOSC8	exosome component 8 [Source:HGNC Symbol;Acc:HGNC:17035]	30023	-0.184753	-0.727987	No
XRCC6	X-ray repair cross complementing 6 [Source:HGNC Symbol;Acc:HGNC:4055]	30102	-0.190021	-0.729049	No
RBBP7	RB binding protein 7, chromatin remodeling factor [Source:HGNC Symbol;Acc:HGNC:9890]	30462	-0.210978	-0.737176	No
RPA1	replication protein A1 [Source:HGNC Symbol;Acc:HGNC:10289]	30658	-0.222925	-0.741062	No
NUDT21	nudix hydrolase 21 [Source:HGNC Symbol;Acc:HGNC:13870]	31188	-0.250133	-0.753334	No
NME1	NME/NM23 nucleoside diphosphate kinase 1 [Source:HGNC Symbol;Acc:HGNC:7849]	31559	-0.273778	-0.761436	No
GSPT1	G1 to S phase transition 1 [Source:HGNC Symbol;Acc:HGNC:4621]	31570	-0.27451	-0.760352	No
CTPS1	CTP synthase 1 [Source:HGNC Symbol;Acc:HGNC:2519]	31571	-0.274565	-0.759012	No
RPA2	replication protein A2 [Source:HGNC Symbol;Acc:HGNC:10290]	31596	-0.276281	-0.758276	No
XPO1	exportin 1 [Source:HGNC Symbol;Acc:HGNC:12825]	32016	-0.311939	-0.767441	No
CDKN1A	cyclin dependent kinase inhibitor 1A [Source:HGNC Symbol;Acc:HGNC:1784]	32201	-0.326135	-0.770543	No
RAN	RAN, member RAS oncogene family [Source:HGNC Symbol;Acc:HGNC:9846]	32398	-0.342168	-0.773873	No
EIF2S1	eukaryotic translation initiation factor 2 subunit alpha [Source:HGNC Symbol;Acc:HGNC:3265]	32748	-0.365239	-0.780993	No
ZW10	zw10 kinetochore protein [Source:HGNC Symbol;Acc:HGNC:13194]	32750	-0.365562	-0.779235	No
HUS1	HUS1 checkpoint clamp component [Source:HGNC Symbol;Acc:HGNC:5309]	32876	-0.376589	-0.780586	No
USP1	ubiquitin specific peptidase 1 [Source:HGNC Symbol;Acc:HGNC:12607]	33012	-0.386822	-0.782142	No
RNASEH2A	ribonuclease H2 subunit A [Source:HGNC Symbol;Acc:HGNC:18518]	33025	-0.387705	-0.780557	No
POP7	POP7 homolog, ribonuclease P/MRP subunit [Source:HGNC Symbol;Acc:HGNC:19949]	33066	-0.392046	-0.779664	No
DDX39A	DExD-box helicase 39A [Source:HGNC Symbol;Acc:HGNC:17821]	33219	-0.399618	-0.781592	No
CSE1L	chromosome segregation 1 like [Source:HGNC Symbol;Acc:HGNC:2431]	33228	-0.400049	-0.779844	No
PHF5A	PHD finger protein 5A [Source:HGNC Symbol;Acc:HGNC:18000]	33844	-0.426276	-0.79345	No
PA2G4	proliferation-associated 2G4 [Source:HGNC Symbol;Acc:HGNC:8550]	33856	-0.427476	-0.791645	No
CBX5	chromobox 5 [Source:HGNC Symbol;Acc:HGNC:1555]	33992	-0.441985	-0.792932	No
UNG	uracil DNA glycosylase [Source:HGNC Symbol;Acc:HGNC:12572]	34024	-0.445035	-0.791552	No
PSIP1	PC4 and SFRS1 interacting protein 1 [Source:HGNC Symbol;Acc:HGNC:9527]	34146	-0.457295	-0.792407	No
DCLRE1B	DNA cross-link repair 1B [Source:HGNC Symbol;Acc:HGNC:17641]	34605	-0.477181	-0.801761	No
SMC3	structural maintenance of chromosomes 3 [Source:HGNC Symbol;Acc:HGNC:2468]	34717	-0.481485	-0.802243	No
POLD2	DNA polymerase delta 2, accessory subunit [Source:HGNC Symbol;Acc:HGNC:9176]	34728	-0.482735	-0.800143	No
DUT	deoxyuridine triphosphatase [Source:HGNC Symbol;Acc:HGNC:3078]	35076	-0.501342	-0.806547	No
SUV39H1	suppressor of variegation 3-9 homolog 1 [Source:HGNC Symbol;Acc:HGNC:11479]	35291	-0.522248	-0.809458	Yes
NOLC1	nucleolar and coiled-body phosphoprotein 1 [Source:HGNC Symbol;Acc:HGNC:15608]	35317	-0.525525	-0.807532	Yes
PRPS1	phosphoribosyl pyrophosphate synthetase 1 [Source:HGNC Symbol;Acc:HGNC:9462]	35332	-0.52708	-0.805317	Yes
SSRP1	structure specific recognition protein 1 [Source:HGNC Symbol;Acc:HGNC:11327]	35373	-0.529672	-0.803753	Yes
CHEK2	checkpoint kinase 2 [Source:HGNC Symbol;Acc:HGNC:16627]	35398	-0.532578	-0.801767	Yes
RAD51C	RAD51 paralog C [Source:HGNC Symbol;Acc:HGNC:9820]	35399	-0.532738	-0.799168	Yes
RANBP1	RAN binding protein 1 [Source:HGNC Symbol;Acc:HGNC:9847]	35403	-0.53378	-0.796641	Yes
WDR90	WD repeat domain 90 [Source:HGNC Symbol;Acc:HGNC:26960]	35467	-0.541716	-0.795605	Yes
RAD21	RAD21 cohesin complex component [Source:HGNC Symbol;Acc:HGNC:9811]	35472	-0.542115	-0.793062	Yes
RFC1	replication factor C subunit 1 [Source:HGNC Symbol;Acc:HGNC:9969]	35520	-0.546785	-0.791593	Yes
GINS4	GINS complex subunit 4 [Source:HGNC Symbol;Acc:HGNC:28226]	35628	-0.561752	-0.791582	Yes
IPO7	importin 7 [Source:HGNC Symbol;Acc:HGNC:9852]	35731	-0.57749	-0.791366	Yes
DCTPP1	dCTP pyrophosphatase 1 [Source:HGNC Symbol;Acc:HGNC:28777]	35734	-0.577854	-0.788598	Yes
SMC1A	structural maintenance of chromosomes 1A [Source:HGNC Symbol;Acc:HGNC:11111]	35745	-0.579207	-0.786027	Yes
EED	embryonic ectoderm development [Source:HGNC Symbol;Acc:HGNC:3188]	35773	-0.583593	-0.783869	Yes
LYAR	Ly1 antibody reactive [Source:HGNC Symbol;Acc:HGNC:26021]	35789	-0.586416	-0.78139	Yes
TUBB	tubulin beta class I [Source:HGNC Symbol;Acc:HGNC:20778]	35817	-0.591697	-0.779192	Yes
UBR7	ubiquitin protein ligase E3 component n-recognin 7 [Source:HGNC Symbol;Acc:HGNC:20344]	35902	-0.606424	-0.778376	Yes
AK2	adenylate kinase 2 [Source:HGNC Symbol;Acc:HGNC:362]	36093	-0.638238	-0.780109	Yes
TFRC	transferrin receptor [Source:HGNC Symbol;Acc:HGNC:11763]	36112	-0.64139	-0.777439	Yes
NAA38	N-alpha-acetyltransferase 38, NatC auxiliary subunit [Source:HGNC Symbol;Acc:HGNC:28212]	36180	-0.654558	-0.775954	Yes
SLBP	stem-loop binding protein [Source:HGNC Symbol;Acc:HGNC:10904]	36227	-0.662562	-0.773895	Yes
TIPIN	TIMELESS interacting protein [Source:HGNC Symbol;Acc:HGNC:30750]	36235	-0.663728	-0.770836	Yes
EZH2	enhancer of zeste 2 polycomb repressive complex 2 subunit [Source:HGNC Symbol;Acc:HGNC:3527]	36293	-0.676336	-0.76899	Yes
LBR	lamin B receptor [Source:HGNC Symbol;Acc:HGNC:6518]	36394	-0.695311	-0.768148	Yes
ANP32E	acidic nuclear phosphoprotein 32 family member E [Source:HGNC Symbol;Acc:HGNC:16673]	36405	-0.69653	-0.765005	Yes
PAICS	phosphoribosylaminoimidazole carboxylase and phosphoribosylaminoimidazolesuccinocarboxamide synthase [Source:HGNC Symbol;Acc:HGNC:8587]	36468	-0.705838	-0.763143	Yes
DNMT1	DNA methyltransferase 1 [Source:HGNC Symbol;Acc:HGNC:2976]	36750	-0.760768	-0.766599	Yes
CCP110	centriolar coiled-coil protein 110 [Source:HGNC Symbol;Acc:HGNC:24342]	36754	-0.761156	-0.762962	Yes
TIMELESS	timeless circadian regulator [Source:HGNC Symbol;Acc:HGNC:11813]	36850	-0.786142	-0.76155	Yes
TUBG1	tubulin gamma 1 [Source:HGNC Symbol;Acc:HGNC:12417]	36851	-0.786369	-0.757713	Yes
POLE4	DNA polymerase epsilon 4, accessory subunit [Source:HGNC Symbol;Acc:HGNC:18755]	36887	-0.793489	-0.754735	Yes
SMC4	structural maintenance of chromosomes 4 [Source:HGNC Symbol;Acc:HGNC:14013]	36930	-0.804791	-0.75188	Yes
HMGA1	high mobility group AT-hook 1 [Source:HGNC Symbol;Acc:HGNC:5010]	36974	-0.809385	-0.749028	Yes
POLD1	DNA polymerase delta 1, catalytic subunit [Source:HGNC Symbol;Acc:HGNC:9175]	36991	-0.814722	-0.745461	Yes
DEK	DEK proto-oncogene [Source:HGNC Symbol;Acc:HGNC:2768]	36994	-0.815536	-0.741534	Yes
SNRPB	small nuclear ribonucleoprotein polypeptides B and B1 [Source:HGNC Symbol;Acc:HGNC:11153]	37016	-0.820363	-0.738067	Yes
POLE	DNA polymerase epsilon, catalytic subunit [Source:HGNC Symbol;Acc:HGNC:9177]	37026	-0.823444	-0.734279	Yes
JPT1	Jupiter microtubule associated homolog 1 [Source:HGNC Symbol;Acc:HGNC:14569]	37134	-0.841414	-0.732904	Yes
CKS1B	CDC28 protein kinase regulatory subunit 1B [Source:HGNC Symbol;Acc:HGNC:19083]	37176	-0.85381	-0.729784	Yes
MCM7	minichromosome maintenance complex component 7 [Source:HGNC Symbol;Acc:HGNC:6950]	37479	-0.939704	-0.732902	Yes
TACC3	transforming acidic coiled-coil containing protein 3 [Source:HGNC Symbol;Acc:HGNC:11524]	37576	-0.968499	-0.730626	Yes
TMPO	thymopoietin [Source:HGNC Symbol;Acc:HGNC:11875]	37623	-0.98903	-0.726974	Yes
NUP205	nucleoporin 205 [Source:HGNC Symbol;Acc:HGNC:18658]	37629	-0.990744	-0.722268	Yes
MTHFD2	methylenetetrahydrofolate dehydrogenase (NADP+ dependent) 2, methenyltetrahydrofolate cyclohydrolase [Source:HGNC Symbol;Acc:HGNC:7434]	37775	-1.05014	-0.720843	Yes
BRCA1	BRCA1 DNA repair associated [Source:HGNC Symbol;Acc:HGNC:1100]	37793	-1.05521	-0.716129	Yes
PRDX4	peroxiredoxin 4 [Source:HGNC Symbol;Acc:HGNC:17169]	37796	-1.05721	-0.711022	Yes
MMS22L	MMS22 like, DNA repair protein [Source:HGNC Symbol;Acc:HGNC:21475]	37835	-1.07025	-0.70677	Yes
POLD3	DNA polymerase delta 3, accessory subunit [Source:HGNC Symbol;Acc:HGNC:20932]	37842	-1.073	-0.701688	Yes
RPA3	replication protein A3 [Source:HGNC Symbol;Acc:HGNC:10291]	37926	-1.10994	-0.69839	Yes
PRIM2	DNA primase subunit 2 [Source:HGNC Symbol;Acc:HGNC:9370]	37938	-1.11489	-0.693232	Yes
NCAPD2	non-SMC condensin I complex subunit D2 [Source:HGNC Symbol;Acc:HGNC:24305]	38007	-1.14938	-0.689359	Yes
DCK	deoxycytidine kinase [Source:HGNC Symbol;Acc:HGNC:2704]	38017	-1.1546	-0.683956	Yes
KPNA2	karyopherin subunit alpha 2 [Source:HGNC Symbol;Acc:HGNC:6395]	38023	-1.15788	-0.678434	Yes
H2AZ1	H2A.Z variant histone 1 [Source:HGNC Symbol;Acc:HGNC:4741]	38125	-1.20615	-0.675126	Yes
PSMC3IP	PSMC3 interacting protein [Source:HGNC Symbol;Acc:HGNC:17928]	38151	-1.22378	-0.669793	Yes
CHEK1	checkpoint kinase 1 [Source:HGNC Symbol;Acc:HGNC:1925]	38174	-1.23499	-0.664329	Yes
KIF22	kinesin family member 22 [Source:HGNC Symbol;Acc:HGNC:6391]	38192	-1.24252	-0.658701	Yes
MCM3	minichromosome maintenance complex component 3 [Source:HGNC Symbol;Acc:HGNC:6945]	38213	-1.25403	-0.653093	Yes
GINS3	GINS complex subunit 3 [Source:HGNC Symbol;Acc:HGNC:25851]	38292	-1.30323	-0.648725	Yes
RFC2	replication factor C subunit 2 [Source:HGNC Symbol;Acc:HGNC:9970]	38314	-1.31706	-0.642835	Yes
BARD1	BRCA1 associated RING domain 1 [Source:HGNC Symbol;Acc:HGNC:952]	38321	-1.32449	-0.636526	Yes
DONSON	DNA replication fork stabilization factor DONSON [Source:HGNC Symbol;Acc:HGNC:2993]	38334	-1.33557	-0.630317	Yes
UBE2S	ubiquitin conjugating enzyme E2 S [Source:HGNC Symbol;Acc:HGNC:17895]	38397	-1.37354	-0.625197	Yes
MXD3	MAX dimerization protein 3 [Source:HGNC Symbol;Acc:HGNC:14008]	38400	-1.3773	-0.618529	Yes
DSCC1	DNA replication and sister chromatid cohesion 1 [Source:HGNC Symbol;Acc:HGNC:24453]	38446	-1.41699	-0.612764	Yes
GINS1	GINS complex subunit 1 [Source:HGNC Symbol;Acc:HGNC:28980]	38488	-1.45352	-0.606718	Yes
LIG1	DNA ligase 1 [Source:HGNC Symbol;Acc:HGNC:6598]	38513	-1.47908	-0.600115	Yes
MCM6	minichromosome maintenance complex component 6 [Source:HGNC Symbol;Acc:HGNC:6949]	38516	-1.47997	-0.592946	Yes
RFC3	replication factor C subunit 3 [Source:HGNC Symbol;Acc:HGNC:9971]	38596	-1.53776	-0.587458	Yes
MCM2	minichromosome maintenance complex component 2 [Source:HGNC Symbol;Acc:HGNC:6944]	38609	-1.54558	-0.580224	Yes
MCM5	minichromosome maintenance complex component 5 [Source:HGNC Symbol;Acc:HGNC:6948]	38681	-1.60839	-0.574188	Yes
CCNE1	cyclin E1 [Source:HGNC Symbol;Acc:HGNC:1589]	38719	-1.65327	-0.567066	Yes
H2AX	H2A.X variant histone [Source:HGNC Symbol;Acc:HGNC:4739]	38744	-1.67756	-0.559494	Yes
PCNA	proliferating cell nuclear antigen [Source:HGNC Symbol;Acc:HGNC:8729]	38751	-1.6867	-0.551419	Yes
LMNB1	lamin B1 [Source:HGNC Symbol;Acc:HGNC:6637]	38755	-1.68796	-0.54326	Yes
MCM4	minichromosome maintenance complex component 4 [Source:HGNC Symbol;Acc:HGNC:6947]	38800	-1.75341	-0.535828	Yes
BRCA2	BRCA2 DNA repair associated [Source:HGNC Symbol;Acc:HGNC:1101]	38805	-1.75779	-0.527355	Yes
TRIP13	thyroid hormone receptor interactor 13 [Source:HGNC Symbol;Acc:HGNC:12307]	38848	-1.82412	-0.519527	Yes
CKS2	CDC28 protein kinase regulatory subunit 2 [Source:HGNC Symbol;Acc:HGNC:2000]	38881	-1.86076	-0.511265	Yes
SPAG5	sperm associated antigen 5 [Source:HGNC Symbol;Acc:HGNC:13452]	38895	-1.88352	-0.502408	Yes
MYC	MYC proto-oncogene, bHLH transcription factor [Source:HGNC Symbol;Acc:HGNC:7553]	38902	-1.89498	-0.493316	Yes
CDC20	cell division cycle 20 [Source:HGNC Symbol;Acc:HGNC:1723]	38912	-1.90604	-0.484247	Yes
PLK1	polo like kinase 1 [Source:HGNC Symbol;Acc:HGNC:9077]	38917	-1.91065	-0.475027	Yes
CDCA3	cell division cycle associated 3 [Source:HGNC Symbol;Acc:HGNC:14624]	38928	-1.92085	-0.465911	Yes
HMGB2	high mobility group box 2 [Source:HGNC Symbol;Acc:HGNC:5000]	38935	-1.92536	-0.456671	Yes
ORC6	origin recognition complex subunit 6 [Source:HGNC Symbol;Acc:HGNC:17151]	38937	-1.92973	-0.447283	Yes
CDCA8	cell division cycle associated 8 [Source:HGNC Symbol;Acc:HGNC:14629]	38955	-1.95555	-0.438176	Yes
HELLS	helicase, lymphoid specific [Source:HGNC Symbol;Acc:HGNC:4861]	38993	-2.00779	-0.429324	Yes
AURKA	aurora kinase A [Source:HGNC Symbol;Acc:HGNC:11393]	39017	-2.02445	-0.420034	Yes
CDC25A	cell division cycle 25A [Source:HGNC Symbol;Acc:HGNC:1725]	39019	-2.03312	-0.410141	Yes
CDKN3	cyclin dependent kinase inhibitor 3 [Source:HGNC Symbol;Acc:HGNC:1791]	39020	-2.03344	-0.400221	Yes
RACGAP1	Rac GTPase activating protein 1 [Source:HGNC Symbol;Acc:HGNC:9804]	39073	-2.11796	-0.391214	Yes
RAD51AP1	RAD51 associated protein 1 [Source:HGNC Symbol;Acc:HGNC:16956]	39091	-2.14435	-0.381187	Yes
ASF1B	anti-silencing function 1B histone chaperone [Source:HGNC Symbol;Acc:HGNC:20996]	39096	-2.14715	-0.370814	Yes
ATAD2	ATPase family AAA domain containing 2 [Source:HGNC Symbol;Acc:HGNC:30123]	39104	-2.15911	-0.360459	Yes
SPC25	SPC25 component of NDC80 kinetochore complex [Source:HGNC Symbol;Acc:HGNC:24031]	39119	-2.19005	-0.350131	Yes
KIF4A	kinesin family member 4A [Source:HGNC Symbol;Acc:HGNC:13339]	39128	-2.20755	-0.339566	Yes
MAD2L1	mitotic arrest deficient 2 like 1 [Source:HGNC Symbol;Acc:HGNC:6763]	39140	-2.22379	-0.328997	Yes
UBE2T	ubiquitin conjugating enzyme E2 T [Source:HGNC Symbol;Acc:HGNC:25009]	39144	-2.22971	-0.318196	Yes
PLK4	polo like kinase 4 [Source:HGNC Symbol;Acc:HGNC:11397]	39152	-2.23891	-0.307452	Yes
E2F8	E2F transcription factor 8 [Source:HGNC Symbol;Acc:HGNC:24727]	39169	-2.27402	-0.296766	Yes
DLGAP5	DLG associated protein 5 [Source:HGNC Symbol;Acc:HGNC:16864]	39173	-2.28832	-0.285678	Yes
MKI67	marker of proliferation Ki-67 [Source:HGNC Symbol;Acc:HGNC:7107]	39183	-2.32424	-0.274569	Yes
CIT	citron rho-interacting serine/threonine kinase [Source:HGNC Symbol;Acc:HGNC:1985]	39191	-2.33913	-0.263336	Yes
HMMR	hyaluronan mediated motility receptor [Source:HGNC Symbol;Acc:HGNC:5012]	39199	-2.35019	-0.252049	Yes
KIF18B	kinesin family member 18B [Source:HGNC Symbol;Acc:HGNC:27102]	39202	-2.35518	-0.24061	Yes
CENPM	centromere protein M [Source:HGNC Symbol;Acc:HGNC:18352]	39204	-2.35867	-0.229128	Yes
CENPE	centromere protein E [Source:HGNC Symbol;Acc:HGNC:1856]	39209	-2.36879	-0.217674	Yes
MELK	maternal embryonic leucine zipper kinase [Source:HGNC Symbol;Acc:HGNC:16870]	39212	-2.37376	-0.206144	Yes
CCNB2	cyclin B2 [Source:HGNC Symbol;Acc:HGNC:1580]	39221	-2.39057	-0.194686	Yes
PTTG1	PTTG1 regulator of sister chromatid separation, securin [Source:HGNC Symbol;Acc:HGNC:9690]	39222	-2.39189	-0.183017	Yes
TK1	thymidine kinase 1 [Source:HGNC Symbol;Acc:HGNC:11830]	39238	-2.43697	-0.17151	Yes
ESPL1	extra spindle pole bodies like 1, separase [Source:HGNC Symbol;Acc:HGNC:16856]	39244	-2.45041	-0.159683	Yes
KIF2C	kinesin family member 2C [Source:HGNC Symbol;Acc:HGNC:6393]	39246	-2.45539	-0.14773	Yes
BIRC5	baculoviral IAP repeat containing 5 [Source:HGNC Symbol;Acc:HGNC:593]	39260	-2.50548	-0.135838	Yes
DIAPH3	diaphanous related formin 3 [Source:HGNC Symbol;Acc:HGNC:15480]	39263	-2.51626	-0.123613	Yes
CDC25B	cell division cycle 25B [Source:HGNC Symbol;Acc:HGNC:1726]	39264	-2.51643	-0.111337	Yes
SPC24	SPC24 component of NDC80 kinetochore complex [Source:HGNC Symbol;Acc:HGNC:26913]	39267	-2.51801	-0.0991033	Yes
TOP2A	DNA topoisomerase II alpha [Source:HGNC Symbol;Acc:HGNC:11989]	39268	-2.52167	-0.0868011	Yes
TCF19	transcription factor 19 [Source:HGNC Symbol;Acc:HGNC:11629]	39275	-2.54376	-0.0745441	Yes
BUB1B	BUB1 mitotic checkpoint serine/threonine kinase B [Source:HGNC Symbol;Acc:HGNC:1149]	39280	-2.56075	-0.0621533	Yes
CDK1	cyclin dependent kinase 1 [Source:HGNC Symbol;Acc:HGNC:1722]	39302	-2.62886	-0.0498637	Yes
DEPDC1	DEP domain containing 1 [Source:HGNC Symbol;Acc:HGNC:22949]	39306	-2.65038	-0.0370101	Yes
MYBL2	MYB proto-oncogene like 2 [Source:HGNC Symbol;Acc:HGNC:7548]	39317	-2.69093	-0.0241372	Yes
AURKB	aurora kinase B [Source:HGNC Symbol;Acc:HGNC:11390]	39318	-2.70056	-0.0109622	Yes
RRM2	ribonucleotide reductase regulatory subunit M2 [Source:HGNC Symbol;Acc:HGNC:10452]	39319	-2.70176	0.00221856	Yes

## Sheet: G2M_Checkpoint
SYMBOL	TITLE	RANK IN GENE LIST	RANK METRIC SCORE	RUNNING ES	CORE ENRICHMENT
DMD	dystrophin [Source:HGNC Symbol;Acc:HGNC:2928]	18	3.59651	0.0168916	No
PML	PML nuclear body scaffold [Source:HGNC Symbol;Acc:HGNC:9113]	111	2.6046	0.0271105	No
UCK2	uridine-cytidine kinase 2 [Source:HGNC Symbol;Acc:HGNC:12562]	860	1.35007	0.0145455	No
WRN	WRN RecQ like helicase [Source:HGNC Symbol;Acc:HGNC:12791]	2804	0.789481	-0.0312033	No
SMARCC1	SWI/SNF related, matrix associated, actin dependent regulator of chromatin subfamily c member 1 [Source:HGNC Symbol;Acc:HGNC:11104]	4715	0.553106	-0.0772507	No
PDS5B	PDS5 cohesin associated factor B [Source:HGNC Symbol;Acc:HGNC:20418]	5262	0.502742	-0.0887514	No
TOP1	DNA topoisomerase I [Source:HGNC Symbol;Acc:HGNC:11986]	5531	0.481116	-0.0932659	No
SFPQ	splicing factor proline and glutamine rich [Source:HGNC Symbol;Acc:HGNC:10774]	5664	0.467057	-0.0943794	No
STAG1	stromal antigen 1 [Source:HGNC Symbol;Acc:HGNC:11354]	6286	0.441335	-0.108089	No
ATF5	activating transcription factor 5 [Source:HGNC Symbol;Acc:HGNC:790]	6355	0.435246	-0.107724	No
HMGB3	high mobility group box 3 [Source:HGNC Symbol;Acc:HGNC:5004]	6369	0.433414	-0.105965	No
MTF2	metal response element binding transcription factor 2 [Source:HGNC Symbol;Acc:HGNC:29535]	7111	0.402202	-0.122924	No
NASP	nuclear autoantigenic sperm protein [Source:HGNC Symbol;Acc:HGNC:7644]	7721	0.373666	-0.136654	No
ARID4A	AT-rich interaction domain 4A [Source:HGNC Symbol;Acc:HGNC:9885]	7812	0.366232	-0.137183	No
CDKN1B	cyclin dependent kinase inhibitor 1B [Source:HGNC Symbol;Acc:HGNC:1785]	7872	0.361546	-0.136943	No
CTCF	CCCTC-binding factor [Source:HGNC Symbol;Acc:HGNC:13723]	8166	0.335569	-0.142798	No
ODC1	ornithine decarboxylase 1 [Source:HGNC Symbol;Acc:HGNC:8109]	9826	0.281049	-0.183756	No
SLC12A2	solute carrier family 12 member 2 [Source:HGNC Symbol;Acc:HGNC:10911]	9985	0.270778	-0.186479	No
HNRNPU	heterogeneous nuclear ribonucleoprotein U [Source:HGNC Symbol;Acc:HGNC:5048]	10054	0.266311	-0.186929	No
YTHDC1	YTH domain containing 1 [Source:HGNC Symbol;Acc:HGNC:30626]	10137	0.259532	-0.187768	No
BUB3	BUB3 mitotic checkpoint protein [Source:HGNC Symbol;Acc:HGNC:1151]	10441	0.238909	-0.194344	No
MEIS1	Meis homeobox 1 [Source:HGNC Symbol;Acc:HGNC:7000]	11305	0.180831	-0.215483	No
ORC5	origin recognition complex subunit 5 [Source:HGNC Symbol;Acc:HGNC:8491]	11383	0.175718	-0.216599	No
HSPA8	heat shock protein family A (Hsp70) member 8 [Source:HGNC Symbol;Acc:HGNC:5241]	11570	0.165271	-0.220546	No
STMN1	stathmin 1 [Source:HGNC Symbol;Acc:HGNC:6510]	11769	0.152518	-0.22486	No
ATRX	ATRX chromatin remodeler [Source:HGNC Symbol;Acc:HGNC:886]	11890	0.145575	-0.227219	No
NUMA1	nuclear mitotic apparatus protein 1 [Source:HGNC Symbol;Acc:HGNC:8059]	11970	0.140773	-0.228554	No
NOTCH2	notch receptor 2 [Source:HGNC Symbol;Acc:HGNC:7882]	12261	0.124106	-0.235352	No
E2F4	E2F transcription factor 4 [Source:HGNC Symbol;Acc:HGNC:3118]	12362	0.117888	-0.237334	No
PRMT5	protein arginine methyltransferase 5 [Source:HGNC Symbol;Acc:HGNC:10894]	12461	0.111376	-0.239296	No
EWSR1	EWS RNA binding protein 1 [Source:HGNC Symbol;Acc:HGNC:3508]	12834	0.090028	-0.24835	No
CCNT1	cyclin T1 [Source:HGNC Symbol;Acc:HGNC:1599]	13360	0.0600885	-0.261451	No
SS18	SS18 subunit of BAF chromatin remodeling complex [Source:HGNC Symbol;Acc:HGNC:11340]	13923	0.0284205	-0.275648	No
MAPK14	mitogen-activated protein kinase 14 [Source:HGNC Symbol;Acc:HGNC:6876]	13954	0.026745	-0.276284	No
TNPO2	transportin 2 [Source:HGNC Symbol;Acc:HGNC:19998]	14077	0.0212391	-0.279293	No
HIRA	histone cell cycle regulator [Source:HGNC Symbol;Acc:HGNC:4916]	14142	0.0168573	-0.280844	No
KATNA1	katanin catalytic subunit A1 [Source:HGNC Symbol;Acc:HGNC:6216]	14368	0.00262028	-0.28657	No
CUL3	cullin 3 [Source:HGNC Symbol;Acc:HGNC:2553]	14393	0.000928016	-0.287178	No
RBM14	RNA binding motif protein 14 [Source:HGNC Symbol;Acc:HGNC:14219]	14401	0.000424627	-0.287354	No
CDKN2C	cyclin dependent kinase inhibitor 2C [Source:HGNC Symbol;Acc:HGNC:1789]	17187	0	-0.358388	No
EFNA5	ephrin A5 [Source:HGNC Symbol;Acc:HGNC:3225]	18169	0	-0.383409	No
PTTG3P	pituitary tumor-transforming 3, pseudogene [Source:HGNC Symbol;Acc:HGNC:13422]	20112	0	-0.432941	No
KIF5B	kinesin family member 5B [Source:HGNC Symbol;Acc:HGNC:6324]	26787	-0.00445011	-0.603144	No
HOXC10	homeobox C10 [Source:HGNC Symbol;Acc:HGNC:5122]	26801	-0.00529788	-0.60345	No
CUL5	cullin 5 [Source:HGNC Symbol;Acc:HGNC:2556]	27325	-0.0327325	-0.616631	No
SRSF2	serine and arginine rich splicing factor 2 [Source:HGNC Symbol;Acc:HGNC:10783]	27331	-0.033276	-0.616599	No
NUP98	nucleoporin 98 and 96 precursor [Source:HGNC Symbol;Acc:HGNC:8068]	27383	-0.036752	-0.617722	No
ILF3	interleukin enhancer binding factor 3 [Source:HGNC Symbol;Acc:HGNC:6038]	27438	-0.040098	-0.618906	No
PURA	purine rich element binding protein A [Source:HGNC Symbol;Acc:HGNC:9701]	27455	-0.0412114	-0.619115	No
TRA2B	transformer 2 beta homolog [Source:HGNC Symbol;Acc:HGNC:10781]	27870	-0.062356	-0.629374	No
UPF1	UPF1 RNA helicase and ATPase [Source:HGNC Symbol;Acc:HGNC:9962]	28024	-0.0691152	-0.632943	No
MNAT1	MNAT1 component of CDK activating kinase [Source:HGNC Symbol;Acc:HGNC:7181]	28072	-0.0715082	-0.633796	No
MEIS2	Meis homeobox 2 [Source:HGNC Symbol;Acc:HGNC:7001]	28129	-0.0747818	-0.634864	No
ODF2	outer dense fiber of sperm tails 2 [Source:HGNC Symbol;Acc:HGNC:8114]	28160	-0.0762085	-0.635261	No
SRSF1	serine and arginine rich splicing factor 1 [Source:HGNC Symbol;Acc:HGNC:10780]	28226	-0.0802349	-0.636532	No
SYNCRIP	synaptotagmin binding cytoplasmic RNA interacting protein [Source:HGNC Symbol;Acc:HGNC:16918]	28450	-0.0918349	-0.641777	No
NCL	nucleolin [Source:HGNC Symbol;Acc:HGNC:7667]	28603	-0.099179	-0.645175	No
CUL1	cullin 1 [Source:HGNC Symbol;Acc:HGNC:2551]	28706	-0.106585	-0.647263	No
HNRNPD	heterogeneous nuclear ribonucleoprotein D [Source:HGNC Symbol;Acc:HGNC:5036]	28917	-0.117999	-0.65205	No
CDK4	cyclin dependent kinase 4 [Source:HGNC Symbol;Acc:HGNC:1773]	29006	-0.122394	-0.653704	No
LIG3	DNA ligase 3 [Source:HGNC Symbol;Acc:HGNC:6600]	29132	-0.129696	-0.656266	No
PAFAH1B1	platelet activating factor acetylhydrolase 1b regulatory subunit 1 [Source:HGNC Symbol;Acc:HGNC:8574]	29180	-0.133139	-0.656823	No
PRPF4B	pre-mRNA processing factor 4B [Source:HGNC Symbol;Acc:HGNC:17346]	29235	-0.137092	-0.657539	No
FOXN3	forkhead box N3 [Source:HGNC Symbol;Acc:HGNC:1928]	29243	-0.137716	-0.657053	No
CBX1	chromobox 1 [Source:HGNC Symbol;Acc:HGNC:1551]	29694	-0.164255	-0.667738	No
CUL4A	cullin 4A [Source:HGNC Symbol;Acc:HGNC:2554]	29703	-0.165173	-0.667145	No
CASP8AP2	caspase 8 associated protein 2 [Source:HGNC Symbol;Acc:HGNC:1510]	29718	-0.1663	-0.6667	No
POLA2	DNA polymerase alpha 2, accessory subunit [Source:HGNC Symbol;Acc:HGNC:30073]	29863	-0.175074	-0.669528	No
CHMP1A	charged multivesicular body protein 1A [Source:HGNC Symbol;Acc:HGNC:8740]	30033	-0.18531	-0.672944	No
DR1	down-regulator of transcription 1 [Source:HGNC Symbol;Acc:HGNC:3017]	30460	-0.210803	-0.682793	No
DKC1	dyskerin pseudouridine synthase 1 [Source:HGNC Symbol;Acc:HGNC:2890]	30754	-0.230404	-0.689155	No
SQLE	squalene epoxidase [Source:HGNC Symbol;Acc:HGNC:11279]	30927	-0.242952	-0.692369	No
ABL1	ABL proto-oncogene 1, non-receptor tyrosine kinase [Source:HGNC Symbol;Acc:HGNC:76]	31464	-0.267474	-0.70475	No
GSPT1	G1 to S phase transition 1 [Source:HGNC Symbol;Acc:HGNC:4621]	31570	-0.27451	-0.706104	No
RPA2	replication protein A2 [Source:HGNC Symbol;Acc:HGNC:10290]	31596	-0.276281	-0.705409	No
BCL3	BCL3 transcription coactivator [Source:HGNC Symbol;Acc:HGNC:998]	31627	-0.278321	-0.704831	No
G3BP1	G3BP stress granule assembly factor 1 [Source:HGNC Symbol;Acc:HGNC:30292]	31929	-0.305	-0.711037	No
XPO1	exportin 1 [Source:HGNC Symbol;Acc:HGNC:12825]	32016	-0.311939	-0.711725	No
SRSF10	serine and arginine rich splicing factor 10 [Source:HGNC Symbol;Acc:HGNC:16713]	32412	-0.344129	-0.72014	No
HMGN2	high mobility group nucleosomal binding domain 2 [Source:HGNC Symbol;Acc:HGNC:4986]	32647	-0.357567	-0.724383	No
H2AZ2	H2A.Z variant histone 2 [Source:HGNC Symbol;Acc:HGNC:20664]	32705	-0.362178	-0.72409	No
MAP3K20	mitogen-activated protein kinase kinase kinase 20 [Source:HGNC Symbol;Acc:HGNC:17797]	32778	-0.3672	-0.724155	No
HUS1	HUS1 checkpoint clamp component [Source:HGNC Symbol;Acc:HGNC:5309]	32876	-0.376589	-0.724812	No
E2F3	E2F transcription factor 3 [Source:HGNC Symbol;Acc:HGNC:3115]	33190	-0.396961	-0.73088	No
DDX39A	DExD-box helicase 39A [Source:HGNC Symbol;Acc:HGNC:17821]	33219	-0.399618	-0.729666	No
KPNB1	karyopherin subunit beta 1 [Source:HGNC Symbol;Acc:HGNC:6400]	33871	-0.428986	-0.744201	No
NUP50	nucleoporin 50 [Source:HGNC Symbol;Acc:HGNC:8065]	33884	-0.430896	-0.742428	No
DTYMK	deoxythymidylate kinase [Source:HGNC Symbol;Acc:HGNC:3061]	34034	-0.447147	-0.744071	No
SNRPD1	small nuclear ribonucleoprotein D1 polypeptide [Source:HGNC Symbol;Acc:HGNC:11158]	34158	-0.459436	-0.744992	No
KMT5A	lysine methyltransferase 5A [Source:HGNC Symbol;Acc:HGNC:29489]	34581	-0.474806	-0.753465	No
CDC27	cell division cycle 27 [Source:HGNC Symbol;Acc:HGNC:1728]	35003	-0.492222	-0.761828	No
RAD23B	RAD23 homolog B, nucleotide excision repair protein [Source:HGNC Symbol;Acc:HGNC:9813]	35261	-0.517898	-0.765885	No
SUV39H1	suppressor of variegation 3-9 homolog 1 [Source:HGNC Symbol;Acc:HGNC:11479]	35291	-0.522248	-0.764105	No
NOLC1	nucleolar and coiled-body phosphoprotein 1 [Source:HGNC Symbol;Acc:HGNC:15608]	35317	-0.525525	-0.762207	No
RAD21	RAD21 cohesin complex component [Source:HGNC Symbol;Acc:HGNC:9811]	35472	-0.542115	-0.76352	No
SMC1A	structural maintenance of chromosomes 1A [Source:HGNC Symbol;Acc:HGNC:11111]	35745	-0.579207	-0.767663	No
HIF1A	hypoxia inducible factor 1 subunit alpha [Source:HGNC Symbol;Acc:HGNC:4910]	35755	-0.581024	-0.765089	No
NSD2	nuclear receptor binding SET domain protein 2 [Source:HGNC Symbol;Acc:HGNC:12766]	35826	-0.593572	-0.764011	No
RAD54L	RAD54 like [Source:HGNC Symbol;Acc:HGNC:9826]	36222	-0.661316	-0.770896	Yes
EZH2	enhancer of zeste 2 polycomb repressive complex 2 subunit [Source:HGNC Symbol;Acc:HGNC:3527]	36293	-0.676336	-0.769418	Yes
LBR	lamin B receptor [Source:HGNC Symbol;Acc:HGNC:6518]	36394	-0.695311	-0.768614	Yes
SMAD3	SMAD family member 3 [Source:HGNC Symbol;Acc:HGNC:6769]	36466	-0.705	-0.767024	Yes
SLC38A1	solute carrier family 38 member 1 [Source:HGNC Symbol;Acc:HGNC:13447]	36471	-0.706367	-0.763718	Yes
MT2A	metallothionein 2A [Source:HGNC Symbol;Acc:HGNC:7406]	36631	-0.734678	-0.764229	Yes
SMC4	structural maintenance of chromosomes 4 [Source:HGNC Symbol;Acc:HGNC:14013]	36930	-0.804791	-0.767948	Yes
HMGA1	high mobility group AT-hook 1 [Source:HGNC Symbol;Acc:HGNC:5010]	36974	-0.809385	-0.76514	Yes
POLE	DNA polymerase epsilon, catalytic subunit [Source:HGNC Symbol;Acc:HGNC:9177]	37026	-0.823444	-0.762468	Yes
RASAL2	RAS protein activator like 2 [Source:HGNC Symbol;Acc:HGNC:9874]	37032	-0.824902	-0.758616	Yes
JPT1	Jupiter microtubule associated homolog 1 [Source:HGNC Symbol;Acc:HGNC:14569]	37134	-0.841414	-0.757133	Yes
CKS1B	CDC28 protein kinase regulatory subunit 1B [Source:HGNC Symbol;Acc:HGNC:19083]	37176	-0.85381	-0.754059	Yes
MARCKS	myristoylated alanine rich protein kinase C substrate [Source:HGNC Symbol;Acc:HGNC:6759]	37189	-0.857242	-0.75023	Yes
FANCC	FA complementation group C [Source:HGNC Symbol;Acc:HGNC:3584]	37234	-0.867264	-0.747168	Yes
TENT4A	terminal nucleotidyltransferase 4A [Source:HGNC Symbol;Acc:HGNC:16705]	37494	-0.944678	-0.749216	Yes
RBL1	RB transcriptional corepressor like 1 [Source:HGNC Symbol;Acc:HGNC:9893]	37553	-0.96227	-0.746054	Yes
TACC3	transforming acidic coiled-coil containing protein 3 [Source:HGNC Symbol;Acc:HGNC:11524]	37576	-0.968499	-0.741942	Yes
TMPO	thymopoietin [Source:HGNC Symbol;Acc:HGNC:11875]	37623	-0.98903	-0.738344	Yes
SLC7A1	solute carrier family 7 member 1 [Source:HGNC Symbol;Acc:HGNC:11057]	37678	-1.0137	-0.734831	Yes
PRC1	protein regulator of cytokinesis 1 [Source:HGNC Symbol;Acc:HGNC:9341]	37789	-1.0538	-0.732553	Yes
NUSAP1	nucleolar and spindle associated protein 1 [Source:HGNC Symbol;Acc:HGNC:18538]	37816	-1.06468	-0.72808	Yes
SAP30	Sin3A associated protein 30 [Source:HGNC Symbol;Acc:HGNC:10532]	37883	-1.09284	-0.724491	Yes
TFDP1	transcription factor Dp-1 [Source:HGNC Symbol;Acc:HGNC:11749]	37903	-1.09956	-0.719671	Yes
PRIM2	DNA primase subunit 2 [Source:HGNC Symbol;Acc:HGNC:9370]	37938	-1.11489	-0.715159	Yes
KPNA2	karyopherin subunit alpha 2 [Source:HGNC Symbol;Acc:HGNC:6395]	38023	-1.15788	-0.711716	Yes
H2AZ1	H2A.Z variant histone 1 [Source:HGNC Symbol;Acc:HGNC:4741]	38125	-1.20615	-0.708473	Yes
CHAF1A	chromatin assembly factor 1 subunit A [Source:HGNC Symbol;Acc:HGNC:1910]	38158	-1.2257	-0.703376	Yes
TGFB1	transforming growth factor beta 1 [Source:HGNC Symbol;Acc:HGNC:11766]	38160	-1.22699	-0.697482	Yes
CHEK1	checkpoint kinase 1 [Source:HGNC Symbol;Acc:HGNC:1925]	38174	-1.23499	-0.691856	Yes
DBF4	DBF4 zinc finger [Source:HGNC Symbol;Acc:HGNC:17364]	38184	-1.23963	-0.686105	Yes
KIF22	kinesin family member 22 [Source:HGNC Symbol;Acc:HGNC:6391]	38192	-1.24252	-0.680289	Yes
MCM3	minichromosome maintenance complex component 3 [Source:HGNC Symbol;Acc:HGNC:6945]	38213	-1.25403	-0.674749	Yes
BARD1	BRCA1 associated RING domain 1 [Source:HGNC Symbol;Acc:HGNC:952]	38321	-1.32449	-0.671089	Yes
TLE3	TLE family member 3, transcriptional corepressor [Source:HGNC Symbol;Acc:HGNC:11839]	38341	-1.33724	-0.665122	Yes
UBE2S	ubiquitin conjugating enzyme E2 S [Source:HGNC Symbol;Acc:HGNC:17895]	38397	-1.37354	-0.659898	Yes
SMC2	structural maintenance of chromosomes 2 [Source:HGNC Symbol;Acc:HGNC:14011]	38421	-1.398	-0.653741	Yes
H2BC12	H2B clustered histone 12 [Source:HGNC Symbol;Acc:HGNC:13954]	38441	-1.41203	-0.647413	Yes
CCND1	cyclin D1 [Source:HGNC Symbol;Acc:HGNC:1582]	38482	-1.45099	-0.641433	Yes
MCM6	minichromosome maintenance complex component 6 [Source:HGNC Symbol;Acc:HGNC:6949]	38516	-1.47997	-0.635135	Yes
CCNF	cyclin F [Source:HGNC Symbol;Acc:HGNC:1591]	38561	-1.50721	-0.628986	Yes
INCENP	inner centromere protein [Source:HGNC Symbol;Acc:HGNC:6058]	38573	-1.52108	-0.621929	Yes
MCM2	minichromosome maintenance complex component 2 [Source:HGNC Symbol;Acc:HGNC:6944]	38609	-1.54558	-0.615365	Yes
STIL	STIL centriolar assembly protein [Source:HGNC Symbol;Acc:HGNC:10879]	38636	-1.56738	-0.608467	Yes
GINS2	GINS complex subunit 2 [Source:HGNC Symbol;Acc:HGNC:24575]	38638	-1.56878	-0.600924	Yes
TRAIP	TRAF interacting protein [Source:HGNC Symbol;Acc:HGNC:30764]	38657	-1.58632	-0.59373	Yes
KIF20B	kinesin family member 20B [Source:HGNC Symbol;Acc:HGNC:7212]	38665	-1.59297	-0.586223	Yes
MCM5	minichromosome maintenance complex component 5 [Source:HGNC Symbol;Acc:HGNC:6948]	38681	-1.60839	-0.578847	Yes
FBXO5	F-box protein 5 [Source:HGNC Symbol;Acc:HGNC:13584]	38716	-1.64792	-0.571764	Yes
H2AX	H2A.X variant histone [Source:HGNC Symbol;Acc:HGNC:4739]	38744	-1.67756	-0.564359	Yes
TROAP	trophinin associated protein [Source:HGNC Symbol;Acc:HGNC:12327]	38745	-1.67875	-0.55626	Yes
LMNB1	lamin B1 [Source:HGNC Symbol;Acc:HGNC:6637]	38755	-1.68796	-0.548347	Yes
CDC7	cell division cycle 7 [Source:HGNC Symbol;Acc:HGNC:1745]	38798	-1.75279	-0.540962	Yes
BRCA2	BRCA2 DNA repair associated [Source:HGNC Symbol;Acc:HGNC:1101]	38805	-1.75779	-0.532635	Yes
CKS2	CDC28 protein kinase regulatory subunit 2 [Source:HGNC Symbol;Acc:HGNC:2000]	38881	-1.86076	-0.525571	Yes
MYC	MYC proto-oncogene, bHLH transcription factor [Source:HGNC Symbol;Acc:HGNC:7553]	38902	-1.89498	-0.516939	Yes
CDC20	cell division cycle 20 [Source:HGNC Symbol;Acc:HGNC:1723]	38912	-1.90604	-0.507973	Yes
PLK1	polo like kinase 1 [Source:HGNC Symbol;Acc:HGNC:9077]	38917	-1.91065	-0.498858	Yes
ORC6	origin recognition complex subunit 6 [Source:HGNC Symbol;Acc:HGNC:17151]	38937	-1.92973	-0.490032	Yes
TPX2	TPX2 microtubule nucleation factor [Source:HGNC Symbol;Acc:HGNC:1249]	38972	-1.96435	-0.481423	Yes
AURKA	aurora kinase A [Source:HGNC Symbol;Acc:HGNC:11393]	39017	-2.02445	-0.472779	Yes
CDC25A	cell division cycle 25A [Source:HGNC Symbol;Acc:HGNC:1725]	39019	-2.03312	-0.462996	Yes
CDKN3	cyclin dependent kinase inhibitor 3 [Source:HGNC Symbol;Acc:HGNC:1791]	39020	-2.03344	-0.453186	Yes
EGF	epidermal growth factor [Source:HGNC Symbol;Acc:HGNC:3229]	39043	-2.06336	-0.443793	Yes
NDC80	NDC80 kinetochore complex component [Source:HGNC Symbol;Acc:HGNC:16909]	39055	-2.09486	-0.433967	Yes
RACGAP1	Rac GTPase activating protein 1 [Source:HGNC Symbol;Acc:HGNC:9804]	39073	-2.11796	-0.424183	Yes
RPS6KA5	ribosomal protein S6 kinase A5 [Source:HGNC Symbol;Acc:HGNC:10434]	39075	-2.11847	-0.413988	Yes
AMD1	adenosylmethionine decarboxylase 1 [Source:HGNC Symbol;Acc:HGNC:457]	39079	-2.12032	-0.403836	Yes
SLC7A5	solute carrier family 7 member 5 [Source:HGNC Symbol;Acc:HGNC:11063]	39089	-2.13744	-0.393753	Yes
UBE2C	ubiquitin conjugating enzyme E2 C [Source:HGNC Symbol;Acc:HGNC:15937]	39095	-2.14643	-0.383526	Yes
KIF11	kinesin family member 11 [Source:HGNC Symbol;Acc:HGNC:6388]	39118	-2.18365	-0.373552	Yes
POLQ	DNA polymerase theta [Source:HGNC Symbol;Acc:HGNC:9186]	39123	-2.20072	-0.363037	Yes
KIF4A	kinesin family member 4A [Source:HGNC Symbol;Acc:HGNC:13339]	39128	-2.20755	-0.352489	Yes
MAD2L1	mitotic arrest deficient 2 like 1 [Source:HGNC Symbol;Acc:HGNC:6763]	39140	-2.22379	-0.342042	Yes
CCNA2	cyclin A2 [Source:HGNC Symbol;Acc:HGNC:1578]	39147	-2.23476	-0.331414	Yes
PLK4	polo like kinase 4 [Source:HGNC Symbol;Acc:HGNC:11397]	39152	-2.23891	-0.320714	Yes
MKI67	marker of proliferation Ki-67 [Source:HGNC Symbol;Acc:HGNC:7107]	39183	-2.32424	-0.310267	Yes
CENPF	centromere protein F [Source:HGNC Symbol;Acc:HGNC:1857]	39184	-2.32667	-0.299042	Yes
HMMR	hyaluronan mediated motility receptor [Source:HGNC Symbol;Acc:HGNC:5012]	39199	-2.35019	-0.288061	Yes
EXO1	exonuclease 1 [Source:HGNC Symbol;Acc:HGNC:3511]	39200	-2.3504	-0.276722	Yes
KIF23	kinesin family member 23 [Source:HGNC Symbol;Acc:HGNC:6392]	39208	-2.36855	-0.265474	Yes
CENPE	centromere protein E [Source:HGNC Symbol;Acc:HGNC:1856]	39209	-2.36879	-0.254046	Yes
CCNB2	cyclin B2 [Source:HGNC Symbol;Acc:HGNC:1580]	39221	-2.39057	-0.242794	Yes
PTTG1	PTTG1 regulator of sister chromatid separation, securin [Source:HGNC Symbol;Acc:HGNC:9690]	39222	-2.39189	-0.231255	Yes
KIF15	kinesin family member 15 [Source:HGNC Symbol;Acc:HGNC:17273]	39224	-2.39518	-0.219725	Yes
KNL1	kinetochore scaffold 1 [Source:HGNC Symbol;Acc:HGNC:24054]	39229	-2.42064	-0.208149	Yes
ESPL1	extra spindle pole bodies like 1, separase [Source:HGNC Symbol;Acc:HGNC:16856]	39244	-2.45041	-0.196685	Yes
KIF2C	kinesin family member 2C [Source:HGNC Symbol;Acc:HGNC:6393]	39246	-2.45539	-0.184864	Yes
CDC6	cell division cycle 6 [Source:HGNC Symbol;Acc:HGNC:1744]	39247	-2.45604	-0.173016	Yes
BUB1	BUB1 mitotic checkpoint serine/threonine kinase [Source:HGNC Symbol;Acc:HGNC:1148]	39253	-2.46457	-0.161253	Yes
TTK	TTK protein kinase [Source:HGNC Symbol;Acc:HGNC:12401]	39255	-2.48938	-0.149269	Yes
BIRC5	baculoviral IAP repeat containing 5 [Source:HGNC Symbol;Acc:HGNC:593]	39260	-2.50548	-0.137284	Yes
CDC45	cell division cycle 45 [Source:HGNC Symbol;Acc:HGNC:1739]	39262	-2.51393	-0.125182	Yes
CDC25B	cell division cycle 25B [Source:HGNC Symbol;Acc:HGNC:1726]	39264	-2.51643	-0.113067	Yes
TOP2A	DNA topoisomerase II alpha [Source:HGNC Symbol;Acc:HGNC:11989]	39268	-2.52167	-0.100978	Yes
NEK2	NIMA related kinase 2 [Source:HGNC Symbol;Acc:HGNC:7745]	39273	-2.5418	-0.0888177	Yes
CDK1	cyclin dependent kinase 1 [Source:HGNC Symbol;Acc:HGNC:1722]	39302	-2.62886	-0.0768494	Yes
E2F1	E2F transcription factor 1 [Source:HGNC Symbol;Acc:HGNC:3113]	39311	-2.67419	-0.0641523	Yes
MYBL2	MYB proto-oncogene like 2 [Source:HGNC Symbol;Acc:HGNC:7548]	39317	-2.69093	-0.0512979	Yes
AURKB	aurora kinase B [Source:HGNC Symbol;Acc:HGNC:11390]	39318	-2.70056	-0.0382695	Yes
CENPA	centromere protein A [Source:HGNC Symbol;Acc:HGNC:1851]	39324	-2.72422	-0.0252546	Yes
E2F2	E2F transcription factor 2 [Source:HGNC Symbol;Acc:HGNC:3114]	39330	-2.80933	-0.011829	Yes
PBK	PDZ binding kinase [Source:HGNC Symbol;Acc:HGNC:18282]	39336	-2.84848	0.0017855	Yes

## Sheet: MTORC1_Signaling
SYMBOL	TITLE	RANK IN GENE LIST	RANK METRIC SCORE	RUNNING ES	CORE ENRICHMENT
BTG2	BTG anti-proliferation factor 2 [Source:HGNC Symbol;Acc:HGNC:1131]	94	2.71923	0.0160968	No
CFP	complement factor properdin [Source:HGNC Symbol;Acc:HGNC:8864]	902	1.32096	0.00449802	No
ELOVL6	ELOVL fatty acid elongase 6 [Source:HGNC Symbol;Acc:HGNC:15829]	1468	1.073	-0.00261484	No
ADD3	adducin 3 [Source:HGNC Symbol;Acc:HGNC:245]	1969	0.913357	-0.00915564	No
SLA	Src like adaptor [Source:HGNC Symbol;Acc:HGNC:10902]	2089	0.894228	-0.00610889	No
PPP1R15A	protein phosphatase 1 regulatory subunit 15A [Source:HGNC Symbol;Acc:HGNC:14375]	3617	0.661834	-0.0405547	No
PIK3R3	phosphoinositide-3-kinase regulatory subunit 3 [Source:HGNC Symbol;Acc:HGNC:8981]	3636	0.659337	-0.0365294	No
DHCR7	7-dehydrocholesterol reductase [Source:HGNC Symbol;Acc:HGNC:2860]	3703	0.649681	-0.0337941	No
ABCF2	ATP binding cassette subfamily F member 2 [Source:HGNC Symbol;Acc:HGNC:71]	4926	0.529917	-0.0613579	No
GSK3B	glycogen synthase kinase 3 beta [Source:HGNC Symbol;Acc:HGNC:4617]	5187	0.505767	-0.0645495	No
SKAP2	src kinase associated phosphoprotein 2 [Source:HGNC Symbol;Acc:HGNC:15687]	5551	0.480524	-0.0705398	No
RRP9	ribosomal RNA processing 9, U3 small nucleolar RNA binding protein [Source:HGNC Symbol;Acc:HGNC:16829]	6906	0.420264	-0.102216	No
SQSTM1	sequestosome 1 [Source:HGNC Symbol;Acc:HGNC:11280]	7236	0.392316	-0.107939	No
DAPP1	dual adaptor of phosphotyrosine and 3-phosphoinositides 1 [Source:HGNC Symbol;Acc:HGNC:16500]	7834	0.364779	-0.120685	No
NFYC	nuclear transcription factor Y subunit gamma [Source:HGNC Symbol;Acc:HGNC:7806]	8706	0.29463	-0.140897	No
COPS5	COP9 signalosome subunit 5 [Source:HGNC Symbol;Acc:HGNC:2240]	10118	0.261091	-0.175109	No
LGMN	legumain [Source:HGNC Symbol;Acc:HGNC:9472]	10539	0.233343	-0.184235	No
YKT6	YKT6 v-SNARE homolog [Source:HGNC Symbol;Acc:HGNC:16959]	10683	0.222887	-0.186366	No
NUFIP1	nuclear FMR1 interacting protein 1 [Source:HGNC Symbol;Acc:HGNC:8057]	10700	0.221395	-0.185268	No
HSPA4	heat shock protein family A (Hsp70) member 4 [Source:HGNC Symbol;Acc:HGNC:5237]	10888	0.208359	-0.188621	No
PRDX1	peroxiredoxin 1 [Source:HGNC Symbol;Acc:HGNC:9352]	11020	0.199531	-0.190605	No
VLDLR	very low density lipoprotein receptor [Source:HGNC Symbol;Acc:HGNC:12698]	11483	0.168691	-0.201241	No
TXNRD1	thioredoxin reductase 1 [Source:HGNC Symbol;Acc:HGNC:12437]	11785	0.151623	-0.207887	No
IGFBP5	insulin like growth factor binding protein 5 [Source:HGNC Symbol;Acc:HGNC:5474]	12068	0.135286	-0.21416	No
FKBP2	FKBP prolyl isomerase 2 [Source:HGNC Symbol;Acc:HGNC:3718]	12493	0.109574	-0.224229	No
UBE2D3	ubiquitin conjugating enzyme E2 D3 [Source:HGNC Symbol;Acc:HGNC:12476]	12616	0.102987	-0.22664	No
USO1	USO1 vesicle transport factor [Source:HGNC Symbol;Acc:HGNC:30904]	13100	0.0759482	-0.238443	No
PSMG1	proteasome assembly chaperone 1 [Source:HGNC Symbol;Acc:HGNC:3043]	13169	0.0738662	-0.239675	No
PSMC4	proteasome 26S subunit, ATPase 4 [Source:HGNC Symbol;Acc:HGNC:9551]	13203	0.0716227	-0.240029	No
IDH1	isocitrate dehydrogenase (NADP(+)) 1 [Source:HGNC Symbol;Acc:HGNC:5382]	13352	0.0610422	-0.243389	No
CTH	cystathionine gamma-lyase [Source:HGNC Symbol;Acc:HGNC:2501]	13780	0.03727	-0.254026	No
PSMD14	proteasome 26S subunit, non-ATPase 14 [Source:HGNC Symbol;Acc:HGNC:16889]	13895	0.0293214	-0.256735	No
PSMC6	proteasome 26S subunit, ATPase 6 [Source:HGNC Symbol;Acc:HGNC:9553]	13988	0.0247499	-0.258913	No
ATP6V1D	ATPase H+ transporting V1 subunit D [Source:HGNC Symbol;Acc:HGNC:13527]	14059	0.0221722	-0.260547	No
WARS1	tryptophanyl-tRNA synthetase 1 [Source:HGNC Symbol;Acc:HGNC:12729]	14162	0.0154233	-0.263044	No
ASNS	asparagine synthetase (glutamine-hydrolyzing) [Source:HGNC Symbol;Acc:HGNC:753]	26768	-0.00266524	-0.584525	No
PPA1	inorganic pyrophosphatase 1 [Source:HGNC Symbol;Acc:HGNC:9226]	26938	-0.0128867	-0.588748	No
PSMD13	proteasome 26S subunit, non-ATPase 13 [Source:HGNC Symbol;Acc:HGNC:9558]	27065	-0.019475	-0.591829	No
PSME3	proteasome activator subunit 3 [Source:HGNC Symbol;Acc:HGNC:9570]	27405	-0.038102	-0.600216	No
EDEM1	ER degradation enhancing alpha-mannosidase like protein 1 [Source:HGNC Symbol;Acc:HGNC:18967]	27598	-0.0486554	-0.604782	No
UFM1	ubiquitin fold modifier 1 [Source:HGNC Symbol;Acc:HGNC:20597]	27678	-0.0541247	-0.606429	No
FGL2	fibrinogen like 2 [Source:HGNC Symbol;Acc:HGNC:3696]	27685	-0.0545387	-0.606211	No
RIT1	Ras like without CAAX 1 [Source:HGNC Symbol;Acc:HGNC:10023]	27846	-0.0614382	-0.609874	No
HSPE1	heat shock protein family E (Hsp10) member 1 [Source:HGNC Symbol;Acc:HGNC:5269]	27889	-0.0637789	-0.610512	No
CCT6A	chaperonin containing TCP1 subunit 6A [Source:HGNC Symbol;Acc:HGNC:1620]	27916	-0.0651516	-0.610732	No
NIBAN1	niban apoptosis regulator 1 [Source:HGNC Symbol;Acc:HGNC:16784]	27917	-0.0652754	-0.610288	No
PSMA4	proteasome 20S subunit alpha 4 [Source:HGNC Symbol;Acc:HGNC:9533]	28013	-0.0681489	-0.612247	No
PITPNB	phosphatidylinositol transfer protein beta [Source:HGNC Symbol;Acc:HGNC:9002]	28051	-0.0706567	-0.61271	No
PNO1	partner of NOB1 homolog [Source:HGNC Symbol;Acc:HGNC:32790]	28093	-0.0730094	-0.61326	No
NFKBIB	NFKB inhibitor beta [Source:HGNC Symbol;Acc:HGNC:7798]	28272	-0.0832201	-0.617234	No
G6PD	glucose-6-phosphate dehydrogenase [Source:HGNC Symbol;Acc:HGNC:4057]	28331	-0.0865074	-0.618125	No
SLC9A3R1	SLC9A3 regulator 1 [Source:HGNC Symbol;Acc:HGNC:11075]	28444	-0.0914605	-0.620359	No
PDAP1	PDGFA associated protein 1 [Source:HGNC Symbol;Acc:HGNC:14634]	28457	-0.0922289	-0.620038	No
TCEA1	transcription elongation factor A1 [Source:HGNC Symbol;Acc:HGNC:11612]	28587	-0.0982161	-0.62266	No
SERP1	stress associated endoplasmic reticulum protein 1 [Source:HGNC Symbol;Acc:HGNC:10759]	28591	-0.0983832	-0.622068	No
DDIT3	DNA damage inducible transcript 3 [Source:HGNC Symbol;Acc:HGNC:2726]	28711	-0.106681	-0.624377	No
ACTR3	actin related protein 3 [Source:HGNC Symbol;Acc:HGNC:170]	28744	-0.108576	-0.624455	No
PSMD12	proteasome 26S subunit, non-ATPase 12 [Source:HGNC Symbol;Acc:HGNC:9557]	29022	-0.123701	-0.630679	No
M6PR	mannose-6-phosphate receptor, cation dependent [Source:HGNC Symbol;Acc:HGNC:6752]	29240	-0.137561	-0.635278	No
TBK1	TANK binding kinase 1 [Source:HGNC Symbol;Acc:HGNC:11584]	29297	-0.14152	-0.635744	No
TM7SF2	transmembrane 7 superfamily member 2 [Source:HGNC Symbol;Acc:HGNC:11863]	29553	-0.156636	-0.641182	No
ARPC5L	actin related protein 2/3 complex subunit 5 like [Source:HGNC Symbol;Acc:HGNC:23366]	29698	-0.164579	-0.643736	No
PSMC2	proteasome 26S subunit, ATPase 2 [Source:HGNC Symbol;Acc:HGNC:9548]	29766	-0.169022	-0.644295	No
CACYBP	calcyclin binding protein [Source:HGNC Symbol;Acc:HGNC:30423]	29791	-0.170198	-0.643749	No
NMT1	N-myristoyltransferase 1 [Source:HGNC Symbol;Acc:HGNC:7857]	29821	-0.1722	-0.643318	No
ACTR2	actin related protein 2 [Source:HGNC Symbol;Acc:HGNC:169]	30009	-0.184234	-0.646834	No
HMBS	hydroxymethylbilane synthase [Source:HGNC Symbol;Acc:HGNC:4982]	30065	-0.187548	-0.646962	No
EEF1E1	eukaryotic translation elongation factor 1 epsilon 1 [Source:HGNC Symbol;Acc:HGNC:3212]	30470	-0.211503	-0.655828	No
NUPR1	nuclear protein 1, transcriptional regulator [Source:HGNC Symbol;Acc:HGNC:29990]	30525	-0.215978	-0.655736	No
IFRD1	interferon related developmental regulator 1 [Source:HGNC Symbol;Acc:HGNC:5456]	30607	-0.220428	-0.656303	No
RPA1	replication protein A1 [Source:HGNC Symbol;Acc:HGNC:10289]	30658	-0.222925	-0.656062	No
PSMB5	proteasome 20S subunit beta 5 [Source:HGNC Symbol;Acc:HGNC:9542]	30712	-0.227821	-0.655864	No
GLA	galactosidase alpha [Source:HGNC Symbol;Acc:HGNC:4296]	30834	-0.236712	-0.65734	No
SQLE	squalene epoxidase [Source:HGNC Symbol;Acc:HGNC:11279]	30927	-0.242952	-0.658034	No
PSMA3	proteasome 20S subunit alpha 3 [Source:HGNC Symbol;Acc:HGNC:9532]	31317	-0.259282	-0.666193	No
LTA4H	leukotriene A4 hydrolase [Source:HGNC Symbol;Acc:HGNC:6710]	31426	-0.264736	-0.667147	No
GMPS	guanine monophosphate synthase [Source:HGNC Symbol;Acc:HGNC:4378]	31511	-0.27033	-0.667451	No
HSPA9	heat shock protein family A (Hsp70) member 9 [Source:HGNC Symbol;Acc:HGNC:5244]	31528	-0.271033	-0.666015	No
STIP1	stress induced phosphoprotein 1 [Source:HGNC Symbol;Acc:HGNC:11387]	31549	-0.272378	-0.664673	No
ATP2A2	ATPase sarcoplasmic/endoplasmic reticulum Ca2+ transporting 2 [Source:HGNC Symbol;Acc:HGNC:812]	31732	-0.288084	-0.667356	No
EPRS1	glutamyl-prolyl-tRNA synthetase 1 [Source:HGNC Symbol;Acc:HGNC:3418]	31811	-0.295405	-0.667336	No
HSPA5	heat shock protein family A (Hsp70) member 5 [Source:HGNC Symbol;Acc:HGNC:5238]	31828	-0.296821	-0.665725	No
GTF2H1	general transcription factor IIH subunit 1 [Source:HGNC Symbol;Acc:HGNC:4655]	31909	-0.302989	-0.665705	No
ETF1	eukaryotic translation termination factor 1 [Source:HGNC Symbol;Acc:HGNC:3477]	32054	-0.315142	-0.667234	No
IMMT	inner membrane mitochondrial protein [Source:HGNC Symbol;Acc:HGNC:6047]	32099	-0.318347	-0.666191	No
CDKN1A	cyclin dependent kinase inhibitor 1A [Source:HGNC Symbol;Acc:HGNC:1784]	32201	-0.326135	-0.666549	No
PSPH	phosphoserine phosphatase [Source:HGNC Symbol;Acc:HGNC:9577]	32211	-0.326888	-0.664556	No
HSPD1	heat shock protein family D (Hsp60) member 1 [Source:HGNC Symbol;Acc:HGNC:5261]	32256	-0.332183	-0.663419	No
SEC11A	SEC11 homolog A, signal peptidase complex subunit [Source:HGNC Symbol;Acc:HGNC:17718]	32330	-0.336614	-0.662991	No
SLC7A11	solute carrier family 7 member 11 [Source:HGNC Symbol;Acc:HGNC:11059]	32397	-0.342155	-0.662347	No
PPIA	peptidylprolyl isomerase A [Source:HGNC Symbol;Acc:HGNC:9253]	32678	-0.360137	-0.66704	No
GCLC	glutamate-cysteine ligase catalytic subunit [Source:HGNC Symbol;Acc:HGNC:4311]	33175	-0.395988	-0.676997	No
DDX39A	DExD-box helicase 39A [Source:HGNC Symbol;Acc:HGNC:17821]	33219	-0.399618	-0.675376	No
ATP5MC1	ATP synthase membrane subunit c locus 1 [Source:HGNC Symbol;Acc:HGNC:841]	33275	-0.40523	-0.674023	No
HPRT1	hypoxanthine phosphoribosyltransferase 1 [Source:HGNC Symbol;Acc:HGNC:5157]	33710	-0.415356	-0.682267	No
UCHL5	ubiquitin C-terminal hydrolase L5 [Source:HGNC Symbol;Acc:HGNC:19678]	33903	-0.43245	-0.684223	No
UNG	uracil DNA glycosylase [Source:HGNC Symbol;Acc:HGNC:12572]	34024	-0.445035	-0.684257	No
QDPR	quinoid dihydropteridine reductase [Source:HGNC Symbol;Acc:HGNC:9752]	34153	-0.458744	-0.684401	No
RPN1	ribophorin I [Source:HGNC Symbol;Acc:HGNC:10381]	34490	-0.466104	-0.689801	Yes
EIF2S2	eukaryotic translation initiation factor 2 subunit beta [Source:HGNC Symbol;Acc:HGNC:3266]	34502	-0.466999	-0.686906	Yes
RDH11	retinol dehydrogenase 11 [Source:HGNC Symbol;Acc:HGNC:17964]	34644	-0.479185	-0.687243	Yes
ACACA	acetyl-CoA carboxylase alpha [Source:HGNC Symbol;Acc:HGNC:84]	34653	-0.480225	-0.684181	Yes
GGA2	golgi associated, gamma adaptin ear containing, ARF binding protein 2 [Source:HGNC Symbol;Acc:HGNC:16064]	34720	-0.48184	-0.682587	Yes
CCNG1	cyclin G1 [Source:HGNC Symbol;Acc:HGNC:1592]	34727	-0.482708	-0.679457	Yes
TOMM40	translocase of outer mitochondrial membrane 40 [Source:HGNC Symbol;Acc:HGNC:18001]	34953	-0.485957	-0.681891	Yes
SDF2L1	stromal cell derived factor 2 like 1 [Source:HGNC Symbol;Acc:HGNC:10676]	34958	-0.487379	-0.678678	Yes
NAMPT	nicotinamide phosphoribosyltransferase [Source:HGNC Symbol;Acc:HGNC:30092]	35061	-0.499377	-0.677883	Yes
CYP51A1	cytochrome P450 family 51 subfamily A member 1 [Source:HGNC Symbol;Acc:HGNC:2649]	35260	-0.517664	-0.679412	Yes
GOT1	glutamic-oxaloacetic transaminase 1 [Source:HGNC Symbol;Acc:HGNC:4432]	35285	-0.521041	-0.676481	Yes
RAB1A	RAB1A, member RAS oncogene family [Source:HGNC Symbol;Acc:HGNC:9758]	35329	-0.526968	-0.673993	Yes
CANX	calnexin [Source:HGNC Symbol;Acc:HGNC:1473]	35367	-0.528663	-0.671342	Yes
HSP90B1	heat shock protein 90 beta family member 1 [Source:HGNC Symbol;Acc:HGNC:12028]	35489	-0.543523	-0.670731	Yes
GBE1	1,4-alpha-glucan branching enzyme 1 [Source:HGNC Symbol;Acc:HGNC:4180]	35515	-0.546115	-0.667654	Yes
GSR	glutathione-disulfide reductase [Source:HGNC Symbol;Acc:HGNC:4623]	35530	-0.54783	-0.664285	Yes
ADIPOR2	adiponectin receptor 2 [Source:HGNC Symbol;Acc:HGNC:24041]	35594	-0.557144	-0.662103	Yes
NFIL3	nuclear factor, interleukin 3 regulated [Source:HGNC Symbol;Acc:HGNC:7787]	35609	-0.559184	-0.658657	Yes
ACLY	ATP citrate lyase [Source:HGNC Symbol;Acc:HGNC:115]	35666	-0.56737	-0.656226	Yes
CORO1A	coronin 1A [Source:HGNC Symbol;Acc:HGNC:2252]	35689	-0.570482	-0.652907	Yes
FDXR	ferredoxin reductase [Source:HGNC Symbol;Acc:HGNC:3642]	35791	-0.586664	-0.651493	Yes
SLC6A6	solute carrier family 6 member 6 [Source:HGNC Symbol;Acc:HGNC:11052]	35867	-0.601325	-0.649317	Yes
HMGCR	3-hydroxy-3-methylglutaryl-CoA reductase [Source:HGNC Symbol;Acc:HGNC:5006]	35918	-0.609383	-0.646447	Yes
TRIB3	tribbles pseudokinase 3 [Source:HGNC Symbol;Acc:HGNC:16228]	35950	-0.615353	-0.643053	Yes
SC5D	sterol-C5-desaturase [Source:HGNC Symbol;Acc:HGNC:10547]	35978	-0.621098	-0.639517	Yes
XBP1	X-box binding protein 1 [Source:HGNC Symbol;Acc:HGNC:12801]	36048	-0.629609	-0.636995	Yes
TFRC	transferrin receptor [Source:HGNC Symbol;Acc:HGNC:11763]	36112	-0.64139	-0.634239	Yes
STC1	stanniocalcin 1 [Source:HGNC Symbol;Acc:HGNC:11373]	36208	-0.659134	-0.632179	Yes
PSAT1	phosphoserine aminotransferase 1 [Source:HGNC Symbol;Acc:HGNC:19129]	36341	-0.683721	-0.630896	Yes
CALR	calreticulin [Source:HGNC Symbol;Acc:HGNC:1455]	36388	-0.693744	-0.627351	Yes
SLC37A4	solute carrier family 37 member 4 [Source:HGNC Symbol;Acc:HGNC:4061]	36560	-0.719557	-0.626818	Yes
IFI30	IFI30 lysosomal thiol reductase [Source:HGNC Symbol;Acc:HGNC:5398]	36563	-0.720317	-0.62197	Yes
PFKL	phosphofructokinase, liver type [Source:HGNC Symbol;Acc:HGNC:8876]	36570	-0.720697	-0.617222	Yes
CTSC	cathepsin C [Source:HGNC Symbol;Acc:HGNC:2528]	36625	-0.733705	-0.613609	Yes
POLR3G	RNA polymerase III subunit G [Source:HGNC Symbol;Acc:HGNC:30075]	36723	-0.752766	-0.610963	Yes
MLLT11	MLLT11 transcription factor 7 cofactor [Source:HGNC Symbol;Acc:HGNC:16997]	36788	-0.770425	-0.607356	Yes
BCAT1	branched chain amino acid transaminase 1 [Source:HGNC Symbol;Acc:HGNC:976]	36795	-0.772138	-0.602257	Yes
TUBG1	tubulin gamma 1 [Source:HGNC Symbol;Acc:HGNC:12417]	36851	-0.786369	-0.598311	Yes
TMEM97	transmembrane protein 97 [Source:HGNC Symbol;Acc:HGNC:28106]	36996	-0.815801	-0.596436	Yes
PGM1	phosphoglucomutase 1 [Source:HGNC Symbol;Acc:HGNC:8905]	37114	-0.837022	-0.593727	Yes
MAP2K3	mitogen-activated protein kinase kinase 3 [Source:HGNC Symbol;Acc:HGNC:6843]	37128	-0.839615	-0.588348	Yes
SHMT2	serine hydroxymethyltransferase 2 [Source:HGNC Symbol;Acc:HGNC:10852]	37144	-0.842734	-0.582999	Yes
SORD	sorbitol dehydrogenase [Source:HGNC Symbol;Acc:HGNC:11184]	37243	-0.869208	-0.579587	Yes
SYTL2	synaptotagmin like 2 [Source:HGNC Symbol;Acc:HGNC:15585]	37253	-0.872343	-0.573883	Yes
TES	testin LIM domain protein [Source:HGNC Symbol;Acc:HGNC:14620]	37254	-0.87247	-0.567949	Yes
ELOVL5	ELOVL fatty acid elongase 5 [Source:HGNC Symbol;Acc:HGNC:21308]	37278	-0.878399	-0.562562	Yes
P4HA1	prolyl 4-hydroxylase subunit alpha 1 [Source:HGNC Symbol;Acc:HGNC:8546]	37295	-0.885687	-0.556946	Yes
CXCR4	C-X-C motif chemokine receptor 4 [Source:HGNC Symbol;Acc:HGNC:2561]	37316	-0.891576	-0.551392	Yes
PHGDH	phosphoglycerate dehydrogenase [Source:HGNC Symbol;Acc:HGNC:8923]	37420	-0.928617	-0.547704	Yes
DHCR24	24-dehydrocholesterol reductase [Source:HGNC Symbol;Acc:HGNC:2859]	37604	-0.981085	-0.545698	Yes
NUP205	nucleoporin 205 [Source:HGNC Symbol;Acc:HGNC:18658]	37629	-0.990744	-0.539572	Yes
SLC1A5	solute carrier family 1 member 5 [Source:HGNC Symbol;Acc:HGNC:10943]	37649	-0.998257	-0.533267	Yes
LDHA	lactate dehydrogenase A [Source:HGNC Symbol;Acc:HGNC:6535]	37673	-1.0122	-0.52697	Yes
DDIT4	DNA damage inducible transcript 4 [Source:HGNC Symbol;Acc:HGNC:24944]	37711	-1.02303	-0.520955	Yes
ACSL3	acyl-CoA synthetase long chain family member 3 [Source:HGNC Symbol;Acc:HGNC:3570]	37714	-1.02418	-0.514041	Yes
MTHFD2	methylenetetrahydrofolate dehydrogenase (NADP+ dependent) 2, methenyltetrahydrofolate cyclohydrolase [Source:HGNC Symbol;Acc:HGNC:7434]	37775	-1.05014	-0.508429	Yes
IDI1	isopentenyl-diphosphate delta isomerase 1 [Source:HGNC Symbol;Acc:HGNC:5387]	37795	-1.05714	-0.501723	Yes
EBP	EBP cholestenol delta-isomerase [Source:HGNC Symbol;Acc:HGNC:3133]	37891	-1.09537	-0.496696	Yes
ENO1	enolase 1 [Source:HGNC Symbol;Acc:HGNC:3350]	37982	-1.13459	-0.491275	Yes
ME1	malic enzyme 1 [Source:HGNC Symbol;Acc:HGNC:6983]	38042	-1.16492	-0.484857	Yes
PDK1	pyruvate dehydrogenase kinase 1 [Source:HGNC Symbol;Acc:HGNC:8809]	38086	-1.18548	-0.477891	Yes
ITGB2	integrin subunit beta 2 [Source:HGNC Symbol;Acc:HGNC:6155]	38128	-1.20764	-0.470723	Yes
AK4	adenylate kinase 4 [Source:HGNC Symbol;Acc:HGNC:363]	38171	-1.23029	-0.463427	Yes
PNP	purine nucleoside phosphorylase [Source:HGNC Symbol;Acc:HGNC:7892]	38337	-1.33642	-0.458546	Yes
SSR1	signal sequence receptor subunit 1 [Source:HGNC Symbol;Acc:HGNC:11323]	38385	-1.36513	-0.45046	Yes
GLRX	glutaredoxin [Source:HGNC Symbol;Acc:HGNC:4330]	38407	-1.38447	-0.441579	Yes
EGLN3	egl-9 family hypoxia inducible factor 3 [Source:HGNC Symbol;Acc:HGNC:14661]	38408	-1.38453	-0.432163	Yes
TPI1	triosephosphate isomerase 1 [Source:HGNC Symbol;Acc:HGNC:12009]	38432	-1.40462	-0.423196	Yes
MTHFD2L	methylenetetrahydrofolate dehydrogenase (NADP+ dependent) 2 like [Source:HGNC Symbol;Acc:HGNC:31865]	38447	-1.41751	-0.413912	Yes
SRD5A1	steroid 5 alpha-reductase 1 [Source:HGNC Symbol;Acc:HGNC:11284]	38449	-1.41931	-0.404285	Yes
FADS1	fatty acid desaturase 1 [Source:HGNC Symbol;Acc:HGNC:3574]	38512	-1.47596	-0.395827	Yes
HK2	hexokinase 2 [Source:HGNC Symbol;Acc:HGNC:4923]	38521	-1.48296	-0.385945	Yes
HMGCS1	3-hydroxy-3-methylglutaryl-CoA synthase 1 [Source:HGNC Symbol;Acc:HGNC:5007]	38554	-1.50185	-0.376547	Yes
CCNF	cyclin F [Source:HGNC Symbol;Acc:HGNC:1591]	38561	-1.50721	-0.366449	Yes
MCM2	minichromosome maintenance complex component 2 [Source:HGNC Symbol;Acc:HGNC:6944]	38609	-1.54558	-0.357136	Yes
SLC2A1	solute carrier family 2 member 1 [Source:HGNC Symbol;Acc:HGNC:11005]	38615	-1.55248	-0.346704	Yes
PGK1	phosphoglycerate kinase 1 [Source:HGNC Symbol;Acc:HGNC:8896]	38674	-1.60498	-0.337268	Yes
GPI	glucose-6-phosphate isomerase [Source:HGNC Symbol;Acc:HGNC:4458]	38710	-1.63988	-0.327007	Yes
ERO1A	endoplasmic reticulum oxidoreductase 1 alpha [Source:HGNC Symbol;Acc:HGNC:13280]	38720	-1.65329	-0.315992	Yes
INSIG1	insulin induced gene 1 [Source:HGNC Symbol;Acc:HGNC:6083]	38793	-1.74525	-0.305959	Yes
MCM4	minichromosome maintenance complex component 4 [Source:HGNC Symbol;Acc:HGNC:6947]	38800	-1.75341	-0.294186	Yes
CD9	CD9 molecule [Source:HGNC Symbol;Acc:HGNC:1709]	38840	-1.81398	-0.282843	Yes
ALDOA	aldolase, fructose-bisphosphate A [Source:HGNC Symbol;Acc:HGNC:414]	38841	-1.8143	-0.270504	Yes
STARD4	StAR related lipid transfer domain containing 4 [Source:HGNC Symbol;Acc:HGNC:18058]	38876	-1.85654	-0.258744	Yes
PLOD2	procollagen-lysine,2-oxoglutarate 5-dioxygenase 2 [Source:HGNC Symbol;Acc:HGNC:9082]	38899	-1.89025	-0.246449	Yes
PLK1	polo like kinase 1 [Source:HGNC Symbol;Acc:HGNC:9077]	38917	-1.91065	-0.233888	Yes
LDLR	low density lipoprotein receptor [Source:HGNC Symbol;Acc:HGNC:6547]	38919	-1.9142	-0.220894	Yes
BHLHE40	basic helix-loop-helix family member e40 [Source:HGNC Symbol;Acc:HGNC:1046]	38929	-1.92128	-0.208057	Yes
SERPINH1	serpin family H member 1 [Source:HGNC Symbol;Acc:HGNC:1546]	38945	-1.94134	-0.195235	Yes
DHFR	dihydrofolate reductase [Source:HGNC Symbol;Acc:HGNC:2861]	38947	-1.94725	-0.182017	Yes
SLC2A3	solute carrier family 2 member 3 [Source:HGNC Symbol;Acc:HGNC:11007]	38980	-1.97157	-0.169424	Yes
AURKA	aurora kinase A [Source:HGNC Symbol;Acc:HGNC:11393]	39017	-2.02445	-0.156573	Yes
CDC25A	cell division cycle 25A [Source:HGNC Symbol;Acc:HGNC:1725]	39019	-2.03312	-0.142771	Yes
SLC7A5	solute carrier family 7 member 5 [Source:HGNC Symbol;Acc:HGNC:11063]	39089	-2.13744	-0.129994	Yes
SCD	stearoyl-CoA desaturase [Source:HGNC Symbol;Acc:HGNC:10571]	39108	-2.16854	-0.115704	Yes
TUBA4A	tubulin alpha 4a [Source:HGNC Symbol;Acc:HGNC:12407]	39188	-2.33493	-0.101838	Yes
FADS2	fatty acid desaturase 2 [Source:HGNC Symbol;Acc:HGNC:3575]	39192	-2.34079	-0.0859941	Yes
GAPDH	glyceraldehyde-3-phosphate dehydrogenase [Source:HGNC Symbol;Acc:HGNC:4141]	39201	-2.3509	-0.0702089	Yes
BUB1	BUB1 mitotic checkpoint serine/threonine kinase [Source:HGNC Symbol;Acc:HGNC:1148]	39253	-2.46457	-0.0547474	Yes
CYB5B	cytochrome b5 type B [Source:HGNC Symbol;Acc:HGNC:24374]	39294	-2.6028	-0.0380652	Yes
RRM2	ribonucleotide reductase regulatory subunit M2 [Source:HGNC Symbol;Acc:HGNC:10452]	39319	-2.70176	-0.0203018	Yes
SLC1A4	solute carrier family 1 member 4 [Source:HGNC Symbol;Acc:HGNC:10942]	39376	-3.30746	0.000764883	Yes

## Sheet: Glycolysis
SYMBOL	TITLE	RANK IN GENE LIST	RANK METRIC SCORE	RUNNING ES	CORE ENRICHMENT
VCAN	versican [Source:HGNC Symbol;Acc:HGNC:2464]	479	1.67511	-0.000952291	No
ARTN	artemin [Source:HGNC Symbol;Acc:HGNC:727]	499	1.65223	0.00967414	No
IGFBP3	insulin like growth factor binding protein 3 [Source:HGNC Symbol;Acc:HGNC:5472]	838	1.3767	0.0103114	No
CASP6	caspase 6 [Source:HGNC Symbol;Acc:HGNC:1507]	1615	1.01668	-0.002644	No
ALDH9A1	aldehyde dehydrogenase 9 family member A1 [Source:HGNC Symbol;Acc:HGNC:412]	2134	0.883737	-0.0099129	No
NDST3	N-deacetylase and N-sulfotransferase 3 [Source:HGNC Symbol;Acc:HGNC:7682]	2229	0.875111	-0.00642542	No
GAPDHS	glyceraldehyde-3-phosphate dehydrogenase, spermatogenic [Source:HGNC Symbol;Acc:HGNC:24864]	2297	0.867843	-0.00229817	No
GNPDA1	glucosamine-6-phosphate deaminase 1 [Source:HGNC Symbol;Acc:HGNC:4417]	2310	0.865759	0.00321789	No
TPBG	trophoblast glycoprotein [Source:HGNC Symbol;Acc:HGNC:12004]	2395	0.854101	0.00681914	No
NT5E	5'-nucleotidase ecto [Source:HGNC Symbol;Acc:HGNC:8021]	3114	0.739113	-0.00652347	No
MERTK	MER proto-oncogene, tyrosine kinase [Source:HGNC Symbol;Acc:HGNC:7027]	3261	0.71787	-0.00541971	No
PC	pyruvate carboxylase [Source:HGNC Symbol;Acc:HGNC:8636]	3344	0.703199	-0.00278225	No
IDUA	alpha-L-iduronidase [Source:HGNC Symbol;Acc:HGNC:5391]	3555	0.669785	-0.00363421	No
HOMER1	homer scaffold protein 1 [Source:HGNC Symbol;Acc:HGNC:17512]	3968	0.631658	-0.00989472	No
GLCE	glucuronic acid epimerase [Source:HGNC Symbol;Acc:HGNC:17855]	4117	0.625679	-0.00946194	No
CITED2	Cbp/p300 interacting transactivator with Glu/Asp rich carboxy-terminal domain 2 [Source:HGNC Symbol;Acc:HGNC:1987]	4319	0.602438	-0.0105372	No
PFKFB1	6-phosphofructo-2-kinase/fructose-2,6-biphosphatase 1 [Source:HGNC Symbol;Acc:HGNC:8872]	4507	0.580885	-0.0114004	No
MIF	macrophage migration inhibitory factor [Source:HGNC Symbol;Acc:HGNC:7097]	5730	0.461359	-0.0394657	No
MET	MET proto-oncogene, receptor tyrosine kinase [Source:HGNC Symbol;Acc:HGNC:7029]	5847	0.454656	-0.0393669	No
GPR87	G protein-coupled receptor 87 [Source:HGNC Symbol;Acc:HGNC:4538]	6316	0.438562	-0.0483543	No
CHST4	carbohydrate sulfotransferase 4 [Source:HGNC Symbol;Acc:HGNC:1972]	6330	0.437352	-0.0457447	No
CHST2	carbohydrate sulfotransferase 2 [Source:HGNC Symbol;Acc:HGNC:1970]	6803	0.430103	-0.054891	No
MIOX	myo-inositol oxygenase [Source:HGNC Symbol;Acc:HGNC:14522]	7364	0.384177	-0.0665906	No
GYS2	glycogen synthase 2 [Source:HGNC Symbol;Acc:HGNC:4707]	7500	0.384177	-0.0674503	No
ALDH7A1	aldehyde dehydrogenase 7 family member A1 [Source:HGNC Symbol;Acc:HGNC:877]	7646	0.379426	-0.0685971	No
CHST6	carbohydrate sulfotransferase 6 [Source:HGNC Symbol;Acc:HGNC:6938]	7703	0.375036	-0.0675033	No
NASP	nuclear autoantigenic sperm protein [Source:HGNC Symbol;Acc:HGNC:7644]	7721	0.373666	-0.065424	No
COG2	component of oligomeric golgi complex 2 [Source:HGNC Symbol;Acc:HGNC:6546]	8304	0.323443	-0.0780932	No
SLC25A13	solute carrier family 25 member 13 [Source:HGNC Symbol;Acc:HGNC:10983]	8696	0.295398	-0.0860794	No
B3GAT1	beta-1,3-glucuronyltransferase 1 [Source:HGNC Symbol;Acc:HGNC:921]	9813	0.281819	-0.112648	No
GNE	glucosamine (UDP-N-acetyl)-2-epimerase/N-acetylmannosamine kinase [Source:HGNC Symbol;Acc:HGNC:23657]	10270	0.250279	-0.122596	No
ALG1	ALG1 chitobiosyldiphosphodolichol beta-mannosyltransferase [Source:HGNC Symbol;Acc:HGNC:18294]	10522	0.234342	-0.127422	No
CAPN5	calpain 5 [Source:HGNC Symbol;Acc:HGNC:1482]	10780	0.2156	-0.132527	No
ALDOB	aldolase, fructose-bisphosphate B [Source:HGNC Symbol;Acc:HGNC:417]	10791	0.214045	-0.131343	No
PKP2	plakophilin 2 [Source:HGNC Symbol;Acc:HGNC:9024]	10841	0.211669	-0.131169	No
RBCK1	RANBP2-type and C3HC4-type zinc finger containing 1 [Source:HGNC Symbol;Acc:HGNC:15864]	11386	0.175496	-0.143864	No
VLDLR	very low density lipoprotein receptor [Source:HGNC Symbol;Acc:HGNC:12698]	11483	0.168691	-0.145178	No
DPYSL4	dihydropyrimidinase like 4 [Source:HGNC Symbol;Acc:HGNC:3016]	11556	0.166488	-0.145895	No
STMN1	stathmin 1 [Source:HGNC Symbol;Acc:HGNC:6510]	11769	0.152518	-0.150276	No
BIK	BCL2 interacting killer [Source:HGNC Symbol;Acc:HGNC:1051]	11982	0.140214	-0.154741	No
AKR1A1	aldo-keto reductase family 1 member A1 [Source:HGNC Symbol;Acc:HGNC:380]	12029	0.138057	-0.154985	No
PAXIP1	PAX interacting protein 1 [Source:HGNC Symbol;Acc:HGNC:8624]	12072	0.134847	-0.15515	No
ECD	ecdysoneless cell cycle regulator [Source:HGNC Symbol;Acc:HGNC:17029]	12681	0.0990878	-0.169991	No
PSMC4	proteasome 26S subunit, ATPase 4 [Source:HGNC Symbol;Acc:HGNC:9551]	13203	0.0716227	-0.182798	No
IDH1	isocitrate dehydrogenase (NADP(+)) 1 [Source:HGNC Symbol;Acc:HGNC:5382]	13352	0.0610422	-0.186162	No
EXT1	exostosin glycosyltransferase 1 [Source:HGNC Symbol;Acc:HGNC:3512]	13611	0.0489093	-0.192414	No
MED24	mediator complex subunit 24 [Source:HGNC Symbol;Acc:HGNC:22963]	13625	0.0478906	-0.192423	No
CTH	cystathionine gamma-lyase [Source:HGNC Symbol;Acc:HGNC:2501]	13780	0.03727	-0.1961	No
B4GALT7	beta-1,4-galactosyltransferase 7 [Source:HGNC Symbol;Acc:HGNC:930]	14075	0.0212699	-0.203456	No
NDUFV3	NADH:ubiquinone oxidoreductase subunit V3 [Source:HGNC Symbol;Acc:HGNC:7719]	14147	0.0164494	-0.205156	No
TGFBI	transforming growth factor beta induced [Source:HGNC Symbol;Acc:HGNC:11771]	14253	0.00969155	-0.207769	No
B3GNT3	UDP-GlcNAc:betaGal beta-1,3-N-acetylglucosaminyltransferase 3 [Source:HGNC Symbol;Acc:HGNC:13528]	16485	0	-0.264672	No
PGAM2	phosphoglycerate mutase 2 [Source:HGNC Symbol;Acc:HGNC:8889]	16911	0	-0.275512	No
DCN	decorin [Source:HGNC Symbol;Acc:HGNC:2705]	18600	0	-0.318566	No
LHPP	phospholysine phosphohistidine inorganic pyrophosphate phosphatase [Source:HGNC Symbol;Acc:HGNC:30042]	26775	-0.00303043	-0.527029	No
AGL	amylo-alpha-1, 6-glucosidase, 4-alpha-glucanotransferase [Source:HGNC Symbol;Acc:HGNC:321]	26876	-0.0100403	-0.529512	No
SRD5A3	steroid 5 alpha-reductase 3 [Source:HGNC Symbol;Acc:HGNC:25812]	27319	-0.0324477	-0.540567	No
AK3	adenylate kinase 3 [Source:HGNC Symbol;Acc:HGNC:17376]	27639	-0.0517211	-0.548355	No
PGLS	6-phosphogluconolactonase [Source:HGNC Symbol;Acc:HGNC:8903]	27649	-0.0523518	-0.548233	No
CHPF2	chondroitin polymerizing factor 2 [Source:HGNC Symbol;Acc:HGNC:29270]	27660	-0.053118	-0.548131	No
KIF2A	kinesin family member 2A [Source:HGNC Symbol;Acc:HGNC:6318]	27855	-0.0617985	-0.552663	No
RARS1	arginyl-tRNA synthetase 1 [Source:HGNC Symbol;Acc:HGNC:9870]	28034	-0.0695293	-0.556736	No
SDHC	succinate dehydrogenase complex subunit C [Source:HGNC Symbol;Acc:HGNC:10682]	28183	-0.0777842	-0.559987	No
G6PD	glucose-6-phosphate dehydrogenase [Source:HGNC Symbol;Acc:HGNC:4057]	28331	-0.0865074	-0.563155	No
CHPF	chondroitin polymerizing factor [Source:HGNC Symbol;Acc:HGNC:24291]	28373	-0.088879	-0.563603	No
FUT8	fucosyltransferase 8 [Source:HGNC Symbol;Acc:HGNC:4019]	28378	-0.0894759	-0.563103	No
B3GALT6	beta-1,3-galactosyltransferase 6 [Source:HGNC Symbol;Acc:HGNC:17978]	28443	-0.0914478	-0.564121	No
DLD	dihydrolipoamide dehydrogenase [Source:HGNC Symbol;Acc:HGNC:2898]	28695	-0.105995	-0.56981	No
GMPPB	GDP-mannose pyrophosphorylase B [Source:HGNC Symbol;Acc:HGNC:22932]	29331	-0.143537	-0.585041	No
PHKA2	phosphorylase kinase regulatory subunit alpha 2 [Source:HGNC Symbol;Acc:HGNC:8926]	29707	-0.165665	-0.593491	No
TKTL1	transketolase like 1 [Source:HGNC Symbol;Acc:HGNC:11835]	29721	-0.166382	-0.592704	No
GFUS	GDP-L-fucose synthase [Source:HGNC Symbol;Acc:HGNC:12390]	29773	-0.169355	-0.592866	No
FKBP4	FKBP prolyl isomerase 4 [Source:HGNC Symbol;Acc:HGNC:3720]	29797	-0.170754	-0.592304	No
HS2ST1	heparan sulfate 2-O-sulfotransferase 1 [Source:HGNC Symbol;Acc:HGNC:5193]	29816	-0.17194	-0.591607	No
SLC35A3	solute carrier family 35 member A3 [Source:HGNC Symbol;Acc:HGNC:11023]	29843	-0.173487	-0.591103	No
LHX9	LIM homeobox 9 [Source:HGNC Symbol;Acc:HGNC:14222]	29991	-0.182935	-0.593622	No
COPB2	COPI coat complex subunit beta 2 [Source:HGNC Symbol;Acc:HGNC:2232]	30128	-0.191649	-0.595802	No
BPNT1	3'(2'), 5'-bisphosphate nucleotidase 1 [Source:HGNC Symbol;Acc:HGNC:1096]	30397	-0.205518	-0.601256	No
PPP2CB	protein phosphatase 2 catalytic subunit beta [Source:HGNC Symbol;Acc:HGNC:9300]	30461	-0.210827	-0.601445	No
ME2	malic enzyme 2 [Source:HGNC Symbol;Acc:HGNC:6984]	30808	-0.234529	-0.608693	No
GALK2	galactokinase 2 [Source:HGNC Symbol;Acc:HGNC:4119]	30974	-0.246272	-0.611245	No
ZNF292	zinc finger protein 292 [Source:HGNC Symbol;Acc:HGNC:18410]	31193	-0.25042	-0.615121	No
UGP2	UDP-glucose pyrophosphorylase 2 [Source:HGNC Symbol;Acc:HGNC:12527]	31565	-0.274062	-0.622741	No
PMM2	phosphomannomutase 2 [Source:HGNC Symbol;Acc:HGNC:9115]	31603	-0.276719	-0.621823	No
SOD1	superoxide dismutase 1 [Source:HGNC Symbol;Acc:HGNC:11179]	31765	-0.291311	-0.623971	No
HSPA5	heat shock protein family A (Hsp70) member 5 [Source:HGNC Symbol;Acc:HGNC:5238]	31828	-0.296821	-0.623556	No
SLC25A10	solute carrier family 25 member 10 [Source:HGNC Symbol;Acc:HGNC:10980]	31975	-0.308905	-0.625203	No
CD44	CD44 molecule (Indian blood group) [Source:HGNC Symbol;Acc:HGNC:1681]	32183	-0.324393	-0.628301	No
QSOX1	quiescin sulfhydryl oxidase 1 [Source:HGNC Symbol;Acc:HGNC:9756]	32293	-0.334133	-0.628834	No
B4GALT1	beta-1,4-galactosyltransferase 1 [Source:HGNC Symbol;Acc:HGNC:924]	32364	-0.339309	-0.628337	No
GALE	UDP-galactose-4-epimerase [Source:HGNC Symbol;Acc:HGNC:4116]	32392	-0.341685	-0.626728	No
GMPPA	GDP-mannose pyrophosphorylase A [Source:HGNC Symbol;Acc:HGNC:22923]	32413	-0.344187	-0.624924	No
GOT2	glutamic-oxaloacetic transaminase 2 [Source:HGNC Symbol;Acc:HGNC:4433]	32452	-0.34781	-0.623554	No
CLDN9	claudin 9 [Source:HGNC Symbol;Acc:HGNC:2051]	32572	-0.353241	-0.624214	No
TXN	thioredoxin [Source:HGNC Symbol;Acc:HGNC:12435]	32641	-0.356511	-0.623551	No
MDH1	malate dehydrogenase 1 [Source:HGNC Symbol;Acc:HGNC:6970]	32657	-0.358003	-0.621526	No
PPIA	peptidylprolyl isomerase A [Source:HGNC Symbol;Acc:HGNC:9253]	32678	-0.360137	-0.619614	No
CHST12	carbohydrate sulfotransferase 12 [Source:HGNC Symbol;Acc:HGNC:17423]	32731	-0.364173	-0.618491	No
GCLC	glutamate-cysteine ligase catalytic subunit [Source:HGNC Symbol;Acc:HGNC:4311]	33175	-0.395988	-0.627127	No
XYLT2	xylosyltransferase 2 [Source:HGNC Symbol;Acc:HGNC:15517]	33221	-0.399628	-0.625588	No
AGRN	agrin [Source:HGNC Symbol;Acc:HGNC:329]	33731	-0.416921	-0.635766	No
HAX1	HCLS1 associated protein X-1 [Source:HGNC Symbol;Acc:HGNC:16915]	33822	-0.42497	-0.635204	No
HDLBP	high density lipoprotein binding protein [Source:HGNC Symbol;Acc:HGNC:4857]	33959	-0.438203	-0.635726	No
TFF3	trefoil factor 3 [Source:HGNC Symbol;Acc:HGNC:11757]	34270	-0.464786	-0.640507	No
FBP2	fructose-bisphosphatase 2 [Source:HGNC Symbol;Acc:HGNC:3607]	34440	-0.464786	-0.641692	No
ANKZF1	ankyrin repeat and zinc finger peptidyl tRNA hydrolase 1 [Source:HGNC Symbol;Acc:HGNC:25527]	34617	-0.478443	-0.642963	No
B4GALT4	beta-1,4-galactosyltransferase 4 [Source:HGNC Symbol;Acc:HGNC:927]	34946	-0.485112	-0.648067	No
GOT1	glutamic-oxaloacetic transaminase 1 [Source:HGNC Symbol;Acc:HGNC:4432]	35285	-0.521041	-0.653184	Yes
PRPS1	phosphoribosyl pyrophosphate synthetase 1 [Source:HGNC Symbol;Acc:HGNC:9462]	35332	-0.52708	-0.650812	Yes
LDHC	lactate dehydrogenase C [Source:HGNC Symbol;Acc:HGNC:6544]	35409	-0.534223	-0.649158	Yes
PKM	pyruvate kinase M1/2 [Source:HGNC Symbol;Acc:HGNC:9021]	35465	-0.541454	-0.64692	Yes
SDC2	syndecan 2 [Source:HGNC Symbol;Acc:HGNC:10659]	35627	-0.561693	-0.647249	Yes
GUSB	glucuronidase beta [Source:HGNC Symbol;Acc:HGNC:4696]	35654	-0.565866	-0.644107	Yes
GFPT1	glutamine--fructose-6-phosphate transaminase 1 [Source:HGNC Symbol;Acc:HGNC:4241]	35682	-0.570216	-0.640961	Yes
SDC1	syndecan 1 [Source:HGNC Symbol;Acc:HGNC:10658]	35756	-0.581031	-0.638915	Yes
ANGPTL4	angiopoietin like 4 [Source:HGNC Symbol;Acc:HGNC:16039]	35772	-0.583565	-0.635374	Yes
MDH2	malate dehydrogenase 2 [Source:HGNC Symbol;Acc:HGNC:6971]	35813	-0.59029	-0.632424	Yes
SOX9	SRY-box transcription factor 9 [Source:HGNC Symbol;Acc:HGNC:11204]	35816	-0.591544	-0.628497	Yes
MPI	mannose phosphate isomerase [Source:HGNC Symbol;Acc:HGNC:7216]	35819	-0.591741	-0.624569	Yes
B4GALT2	beta-1,4-galactosyltransferase 2 [Source:HGNC Symbol;Acc:HGNC:925]	35845	-0.596659	-0.621194	Yes
POLR3K	RNA polymerase III subunit K [Source:HGNC Symbol;Acc:HGNC:14121]	35851	-0.597918	-0.6173	Yes
EXT2	exostosin glycosyltransferase 2 [Source:HGNC Symbol;Acc:HGNC:3513]	35864	-0.600573	-0.613568	Yes
RPE	ribulose-5-phosphate-3-epimerase [Source:HGNC Symbol;Acc:HGNC:10293]	35866	-0.601032	-0.609551	Yes
NANP	N-acetylneuraminic acid phosphatase [Source:HGNC Symbol;Acc:HGNC:16140]	35905	-0.606577	-0.606441	Yes
IRS2	insulin receptor substrate 2 [Source:HGNC Symbol;Acc:HGNC:6126]	35960	-0.61727	-0.603668	Yes
ISG20	interferon stimulated exonuclease gene 20 [Source:HGNC Symbol;Acc:HGNC:6130]	36030	-0.627404	-0.601208	Yes
NSDHL	NAD(P) dependent steroid dehydrogenase-like [Source:HGNC Symbol;Acc:HGNC:13398]	36089	-0.636701	-0.598406	Yes
SPAG4	sperm associated antigen 4 [Source:HGNC Symbol;Acc:HGNC:11214]	36169	-0.653144	-0.596029	Yes
STC1	stanniocalcin 1 [Source:HGNC Symbol;Acc:HGNC:11373]	36208	-0.659134	-0.592565	Yes
ABCB6	ATP binding cassette subfamily B member 6 (Langereis blood group) [Source:HGNC Symbol;Acc:HGNC:47]	36323	-0.680476	-0.590897	Yes
PGM2	phosphoglucomutase 2 [Source:HGNC Symbol;Acc:HGNC:8906]	36503	-0.708629	-0.590697	Yes
TALDO1	transaldolase 1 [Source:HGNC Symbol;Acc:HGNC:11559]	36525	-0.714129	-0.58643	Yes
SLC37A4	solute carrier family 37 member 4 [Source:HGNC Symbol;Acc:HGNC:4061]	36560	-0.719557	-0.582458	Yes
CLN6	CLN6 transmembrane ER protein [Source:HGNC Symbol;Acc:HGNC:2077]	36760	-0.763045	-0.582403	Yes
TPST1	tyrosylprotein sulfotransferase 1 [Source:HGNC Symbol;Acc:HGNC:12020]	36808	-0.774565	-0.578392	Yes
RRAGD	Ras related GTP binding D [Source:HGNC Symbol;Acc:HGNC:19903]	36911	-0.798641	-0.575623	Yes
B3GAT3	beta-1,3-glucuronyltransferase 3 [Source:HGNC Symbol;Acc:HGNC:923]	36914	-0.799967	-0.570295	Yes
CLDN3	claudin 3 [Source:HGNC Symbol;Acc:HGNC:2045]	36956	-0.806544	-0.565916	Yes
PAM	peptidylglycine alpha-amidating monooxygenase [Source:HGNC Symbol;Acc:HGNC:8596]	37112	-0.836275	-0.564246	Yes
GAL3ST1	galactose-3-O-sulfotransferase 1 [Source:HGNC Symbol;Acc:HGNC:24240]	37155	-0.846573	-0.559624	Yes
MXI1	MAX interactor 1, dimerization protein [Source:HGNC Symbol;Acc:HGNC:7534]	37193	-0.858606	-0.554794	Yes
SDC3	syndecan 3 [Source:HGNC Symbol;Acc:HGNC:10660]	37227	-0.865744	-0.549813	Yes
ARPP19	cAMP regulated phosphoprotein 19 [Source:HGNC Symbol;Acc:HGNC:16967]	37249	-0.87187	-0.544486	Yes
P4HA1	prolyl 4-hydroxylase subunit alpha 1 [Source:HGNC Symbol;Acc:HGNC:8546]	37295	-0.885687	-0.539677	Yes
IER3	immediate early response 3 [Source:HGNC Symbol;Acc:HGNC:5392]	37310	-0.889489	-0.534053	Yes
CXCR4	C-X-C motif chemokine receptor 4 [Source:HGNC Symbol;Acc:HGNC:2561]	37316	-0.891576	-0.528185	Yes
PYGB	glycogen phosphorylase B [Source:HGNC Symbol;Acc:HGNC:9723]	37352	-0.904348	-0.522996	Yes
EFNA3	ephrin A3 [Source:HGNC Symbol;Acc:HGNC:3223]	37517	-0.949492	-0.520793	Yes
CYB5A	cytochrome b5 type A [Source:HGNC Symbol;Acc:HGNC:2570]	37651	-0.99913	-0.517467	Yes
LDHA	lactate dehydrogenase A [Source:HGNC Symbol;Acc:HGNC:6535]	37673	-1.0122	-0.511195	Yes
DDIT4	DNA damage inducible transcript 4 [Source:HGNC Symbol;Acc:HGNC:24944]	37711	-1.02303	-0.505259	Yes
PLOD1	procollagen-lysine,2-oxoglutarate 5-dioxygenase 1 [Source:HGNC Symbol;Acc:HGNC:9081]	37727	-1.03033	-0.498713	Yes
KDELR3	KDEL endoplasmic reticulum protein retention receptor 3 [Source:HGNC Symbol;Acc:HGNC:6306]	37802	-1.06009	-0.493471	Yes
PGAM1	phosphoglycerate mutase 1 [Source:HGNC Symbol;Acc:HGNC:8888]	37845	-1.07515	-0.487312	Yes
SAP30	Sin3A associated protein 30 [Source:HGNC Symbol;Acc:HGNC:10532]	37883	-1.09284	-0.480907	Yes
COL5A1	collagen type V alpha 1 chain [Source:HGNC Symbol;Acc:HGNC:2209]	37917	-1.10786	-0.474298	Yes
IL13RA1	interleukin 13 receptor subunit alpha 1 [Source:HGNC Symbol;Acc:HGNC:5974]	37970	-1.12905	-0.468032	Yes
ENO1	enolase 1 [Source:HGNC Symbol;Acc:HGNC:3350]	37982	-1.13459	-0.460683	Yes
GALK1	galactokinase 1 [Source:HGNC Symbol;Acc:HGNC:4118]	38039	-1.16298	-0.45429	Yes
ME1	malic enzyme 1 [Source:HGNC Symbol;Acc:HGNC:6983]	38042	-1.16492	-0.446507	Yes
NOL3	nucleolar protein 3 [Source:HGNC Symbol;Acc:HGNC:7869]	38165	-1.22922	-0.441352	Yes
AK4	adenylate kinase 4 [Source:HGNC Symbol;Acc:HGNC:363]	38171	-1.23029	-0.433206	Yes
PDK3	pyruvate dehydrogenase kinase 3 [Source:HGNC Symbol;Acc:HGNC:8811]	38251	-1.28017	-0.426612	Yes
LCT	lactase [Source:HGNC Symbol;Acc:HGNC:6530]	38256	-1.28128	-0.418098	Yes
ANG	angiogenin [Source:HGNC Symbol;Acc:HGNC:483]	38263	-1.287	-0.409596	Yes
PPFIA4	PTPRF interacting protein alpha 4 [Source:HGNC Symbol;Acc:HGNC:9248]	38274	-1.29362	-0.401152	Yes
STC2	stanniocalcin 2 [Source:HGNC Symbol;Acc:HGNC:11374]	38295	-1.30417	-0.392891	Yes
GYS1	glycogen synthase 1 [Source:HGNC Symbol;Acc:HGNC:4706]	38362	-1.34704	-0.385516	Yes
FAM162A	family with sequence similarity 162 member A [Source:HGNC Symbol;Acc:HGNC:17865]	38371	-1.35044	-0.376638	Yes
GLRX	glutaredoxin [Source:HGNC Symbol;Acc:HGNC:4330]	38407	-1.38447	-0.368221	Yes
EGLN3	egl-9 family hypoxia inducible factor 3 [Source:HGNC Symbol;Acc:HGNC:14661]	38408	-1.38453	-0.35891	Yes
TPI1	triosephosphate isomerase 1 [Source:HGNC Symbol;Acc:HGNC:12009]	38432	-1.40462	-0.350051	Yes
GPC3	glypican 3 [Source:HGNC Symbol;Acc:HGNC:4451]	38440	-1.41177	-0.340735	Yes
HK2	hexokinase 2 [Source:HGNC Symbol;Acc:HGNC:4923]	38521	-1.48296	-0.332803	Yes
ADORA2B	adenosine A2b receptor [Source:HGNC Symbol;Acc:HGNC:264]	38619	-1.55539	-0.324817	Yes
P4HA2	prolyl 4-hydroxylase subunit alpha 2 [Source:HGNC Symbol;Acc:HGNC:8547]	38628	-1.5631	-0.314509	Yes
PGK1	phosphoglycerate kinase 1 [Source:HGNC Symbol;Acc:HGNC:8896]	38674	-1.60498	-0.304864	Yes
EGFR	epidermal growth factor receptor [Source:HGNC Symbol;Acc:HGNC:3236]	38685	-1.61155	-0.294281	Yes
TGFA	transforming growth factor alpha [Source:HGNC Symbol;Acc:HGNC:11765]	38711	-1.64016	-0.283889	Yes
ERO1A	endoplasmic reticulum oxidoreductase 1 alpha [Source:HGNC Symbol;Acc:HGNC:13280]	38720	-1.65329	-0.272975	Yes
DSC2	desmocollin 2 [Source:HGNC Symbol;Acc:HGNC:3036]	38743	-1.67692	-0.262259	Yes
PYGL	glycogen phosphorylase L [Source:HGNC Symbol;Acc:HGNC:9725]	38750	-1.68509	-0.25108	Yes
VEGFA	vascular endothelial growth factor A [Source:HGNC Symbol;Acc:HGNC:12680]	38776	-1.7224	-0.240135	Yes
PFKP	phosphofructokinase, platelet [Source:HGNC Symbol;Acc:HGNC:8878]	38835	-1.80739	-0.22946	Yes
ALDOA	aldolase, fructose-bisphosphate A [Source:HGNC Symbol;Acc:HGNC:414]	38841	-1.8143	-0.217386	Yes
PLOD2	procollagen-lysine,2-oxoglutarate 5-dioxygenase 2 [Source:HGNC Symbol;Acc:HGNC:9082]	38899	-1.89025	-0.206129	Yes
CHST1	carbohydrate sulfotransferase 1 [Source:HGNC Symbol;Acc:HGNC:1969]	38914	-1.90734	-0.193659	Yes
AURKA	aurora kinase A [Source:HGNC Symbol;Acc:HGNC:11393]	39017	-2.02445	-0.182646	Yes
CACNA1H	calcium voltage-gated channel subunit alpha1 H [Source:HGNC Symbol;Acc:HGNC:1395]	39021	-2.03352	-0.169048	Yes
GPC1	glypican 1 [Source:HGNC Symbol;Acc:HGNC:4449]	39039	-2.05663	-0.155651	Yes
ENO2	enolase 2 [Source:HGNC Symbol;Acc:HGNC:3353]	39088	-2.13697	-0.142504	Yes
HS6ST2	heparan sulfate 6-O-sulfotransferase 2 [Source:HGNC Symbol;Acc:HGNC:19133]	39101	-2.15853	-0.128294	Yes
SLC16A3	solute carrier family 16 member 3 [Source:HGNC Symbol;Acc:HGNC:10924]	39106	-2.16565	-0.113833	Yes
KIF20A	kinesin family member 20A [Source:HGNC Symbol;Acc:HGNC:9787]	39161	-2.25883	-0.10002	Yes
GPC4	glypican 4 [Source:HGNC Symbol;Acc:HGNC:4452]	39165	-2.26954	-0.0848337	Yes
HMMR	hyaluronan mediated motility receptor [Source:HGNC Symbol;Acc:HGNC:5012]	39199	-2.35019	-0.0698707	Yes
CDK1	cyclin dependent kinase 1 [Source:HGNC Symbol;Acc:HGNC:1722]	39302	-2.62886	-0.0547935	Yes
DEPDC1	DEP domain containing 1 [Source:HGNC Symbol;Acc:HGNC:22949]	39306	-2.65038	-0.0370465	Yes
CENPA	centromere protein A [Source:HGNC Symbol;Acc:HGNC:1851]	39324	-2.72422	-0.0191601	Yes
ELF3	E74 like ETS transcription factor 3 [Source:HGNC Symbol;Acc:HGNC:3318]	39363	-3.15634	0.0010967	Yes

## Sheet: Hypoxia
SYMBOL	TITLE	RANK IN GENE LIST	RANK METRIC SCORE	RUNNING ES	CORE ENRICHMENT
ACKR3	atypical chemokine receptor 3 [Source:HGNC Symbol;Acc:HGNC:23692]	36	3.33009	0.0187517	No
CSRP2	cysteine and glycine rich protein 2 [Source:HGNC Symbol;Acc:HGNC:2470]	77	2.77572	0.0341269	No
PDGFB	platelet derived growth factor subunit B [Source:HGNC Symbol;Acc:HGNC:8800]	214	2.16113	0.0434233	No
TPST2	tyrosylprotein sulfotransferase 2 [Source:HGNC Symbol;Acc:HGNC:12021]	235	2.12551	0.0554679	No
DTNA	dystrobrevin alpha [Source:HGNC Symbol;Acc:HGNC:3057]	474	1.68296	0.0593383	No
BTG1	BTG anti-proliferation factor 1 [Source:HGNC Symbol;Acc:HGNC:1130]	551	1.60347	0.0668711	No
NEDD4L	NEDD4 like E3 ubiquitin protein ligase [Source:HGNC Symbol;Acc:HGNC:7728]	771	1.41978	0.0696717	No
IGFBP3	insulin like growth factor binding protein 3 [Source:HGNC Symbol;Acc:HGNC:5472]	838	1.3767	0.0761201	No
PRKCA	protein kinase C alpha [Source:HGNC Symbol;Acc:HGNC:9393]	1038	1.25447	0.0784542	No
CASP6	caspase 6 [Source:HGNC Symbol;Acc:HGNC:1507]	1615	1.01668	0.0697682	No
KLHL24	kelch like family member 24 [Source:HGNC Symbol;Acc:HGNC:25947]	1801	0.957828	0.0707073	No
PHKG1	phosphorylase kinase catalytic subunit gamma 1 [Source:HGNC Symbol;Acc:HGNC:8930]	2144	0.881672	0.0671921	No
GAPDHS	glyceraldehyde-3-phosphate dehydrogenase, spermatogenic [Source:HGNC Symbol;Acc:HGNC:24864]	2297	0.867843	0.0684414	No
TPBG	trophoblast glycoprotein [Source:HGNC Symbol;Acc:HGNC:12004]	2395	0.854101	0.0710122	No
GCNT2	glucosaminyl (N-acetyl) transferase 2 (I blood group) [Source:HGNC Symbol;Acc:HGNC:4204]	2548	0.82293	0.0719962	No
CAVIN1	caveolae associated protein 1 [Source:HGNC Symbol;Acc:HGNC:9688]	2609	0.81389	0.0752733	No
PPP1R15A	protein phosphatase 1 regulatory subunit 15A [Source:HGNC Symbol;Acc:HGNC:14375]	3617	0.661834	0.0534984	No
HEXA	hexosaminidase subunit alpha [Source:HGNC Symbol;Acc:HGNC:4878]	3691	0.652373	0.0554898	No
B4GALNT2	beta-1,4-N-acetyl-galactosaminyltransferase 2 [Source:HGNC Symbol;Acc:HGNC:24136]	4024	0.62982	0.0507421	No
CDKN1C	cyclin dependent kinase inhibitor 1C [Source:HGNC Symbol;Acc:HGNC:1786]	4143	0.619097	0.0513893	No
CITED2	Cbp/p300 interacting transactivator with Glu/Asp rich carboxy-terminal domain 2 [Source:HGNC Symbol;Acc:HGNC:1987]	4319	0.602438	0.0504842	No
TNFAIP3	TNF alpha induced protein 3 [Source:HGNC Symbol;Acc:HGNC:11896]	4376	0.597184	0.0525833	No
PNRC1	proline rich nuclear receptor coactivator 1 [Source:HGNC Symbol;Acc:HGNC:17278]	4499	0.582044	0.0529096	No
IDS	iduronate 2-sulfatase [Source:HGNC Symbol;Acc:HGNC:5389]	4863	0.535478	0.046814	No
ETS1	ETS proto-oncogene 1, transcription factor [Source:HGNC Symbol;Acc:HGNC:3488]	5503	0.483732	0.0333731	No
MIF	macrophage migration inhibitory factor [Source:HGNC Symbol;Acc:HGNC:7097]	5730	0.461359	0.030334	No
CHST2	carbohydrate sulfotransferase 2 [Source:HGNC Symbol;Acc:HGNC:1970]	6803	0.430103	0.0055324	No
BRS3	bombesin receptor subtype 3 [Source:HGNC Symbol;Acc:HGNC:1113]	6893	0.421485	0.00575199	No
CDKN1B	cyclin dependent kinase inhibitor 1B [Source:HGNC Symbol;Acc:HGNC:1785]	7872	0.361546	-0.017057	No
NAGK	N-acetylglucosamine kinase [Source:HGNC Symbol;Acc:HGNC:17174]	8607	0.301216	-0.0339989	No
JUN	Jun proto-oncogene, AP-1 transcription factor subunit [Source:HGNC Symbol;Acc:HGNC:6204]	8787	0.288463	-0.0368606	No
PLIN2	perilipin 2 [Source:HGNC Symbol;Acc:HGNC:248]	9783	0.284417	-0.0605587	No
HAS1	hyaluronan synthase 1 [Source:HGNC Symbol;Acc:HGNC:4818]	10058	0.265982	-0.0659762	No
XPNPEP1	X-prolyl aminopeptidase 1 [Source:HGNC Symbol;Acc:HGNC:12822]	10318	0.24609	-0.0711286	No
PLAC8	placenta associated 8 [Source:HGNC Symbol;Acc:HGNC:19254]	10482	0.236489	-0.0738891	No
TGFB3	transforming growth factor beta 3 [Source:HGNC Symbol;Acc:HGNC:11769]	10648	0.225696	-0.0767644	No
ALDOB	aldolase, fructose-bisphosphate B [Source:HGNC Symbol;Acc:HGNC:417]	10791	0.214045	-0.0791219	No
PLAUR	plasminogen activator, urokinase receptor [Source:HGNC Symbol;Acc:HGNC:9053]	11354	0.17842	-0.0924022	No
VLDLR	very low density lipoprotein receptor [Source:HGNC Symbol;Acc:HGNC:12698]	11483	0.168691	-0.0946705	No
DPYSL4	dihydropyrimidinase like 4 [Source:HGNC Symbol;Acc:HGNC:3016]	11556	0.166488	-0.0955235	No
SDC4	syndecan 4 [Source:HGNC Symbol;Acc:HGNC:10661]	11691	0.157395	-0.0980116	No
KDM3A	lysine demethylase 3A [Source:HGNC Symbol;Acc:HGNC:20815]	11866	0.147564	-0.101578	No
CCN5	cellular communication network factor 5 [Source:HGNC Symbol;Acc:HGNC:12770]	12104	0.132501	-0.10684	No
TGM2	transglutaminase 2 [Source:HGNC Symbol;Acc:HGNC:11778]	12151	0.130806	-0.107241	No
GAA	glucosidase alpha, acid [Source:HGNC Symbol;Acc:HGNC:4065]	12571	0.105017	-0.117307	No
PKP1	plakophilin 1 [Source:HGNC Symbol;Acc:HGNC:9023]	13495	0.0534572	-0.140533	No
HMOX1	heme oxygenase 1 [Source:HGNC Symbol;Acc:HGNC:5013]	13523	0.0530589	-0.140909	No
EXT1	exostosin glycosyltransferase 1 [Source:HGNC Symbol;Acc:HGNC:3512]	13611	0.0489093	-0.142839	No
HS3ST1	heparan sulfate-glucosamine 3-sulfotransferase 1 [Source:HGNC Symbol;Acc:HGNC:5194]	13716	0.0416195	-0.145245	No
TGFBI	transforming growth factor beta induced [Source:HGNC Symbol;Acc:HGNC:11771]	14253	0.00969155	-0.158859	No
LXN	latexin [Source:HGNC Symbol;Acc:HGNC:13347]	14262	0.00887667	-0.159011	No
FOXO3	forkhead box O3 [Source:HGNC Symbol;Acc:HGNC:3821]	14352	0.00343526	-0.161261	No
PGAM2	phosphoglycerate mutase 2 [Source:HGNC Symbol;Acc:HGNC:8889]	16911	0	-0.226504	No
DCN	decorin [Source:HGNC Symbol;Acc:HGNC:2705]	18600	0	-0.269558	No
LALBA	lactalbumin alpha [Source:HGNC Symbol;Acc:HGNC:6480]	24145	0	-0.410961	No
ATP7A	ATPase copper transporting alpha [Source:HGNC Symbol;Acc:HGNC:869]	26794	-0.00490926	-0.478471	No
NDST1	N-deacetylase and N-sulfotransferase 1 [Source:HGNC Symbol;Acc:HGNC:7680]	26874	-0.00976695	-0.480428	No
NCAN	neurocan [Source:HGNC Symbol;Acc:HGNC:2465]	27155	-0.0243544	-0.487426	No
CCNG2	cyclin G2 [Source:HGNC Symbol;Acc:HGNC:1593]	27207	-0.0268243	-0.488568	No
KIF5A	kinesin family member 5A [Source:HGNC Symbol;Acc:HGNC:6323]	27271	-0.0304717	-0.489995	No
PYGM	glycogen phosphorylase, muscle associated [Source:HGNC Symbol;Acc:HGNC:9726]	27320	-0.0324518	-0.491028	No
ENO3	enolase 3 [Source:HGNC Symbol;Acc:HGNC:3354]	27436	-0.0400851	-0.493724	No
SERPINE1	serpin family E member 1 [Source:HGNC Symbol;Acc:HGNC:8583]	28279	-0.0836122	-0.514706	No
B3GALT6	beta-1,3-galactosyltransferase 6 [Source:HGNC Symbol;Acc:HGNC:17978]	28443	-0.0914478	-0.518323	No
FOSL2	FOS like 2, AP-1 transcription factor subunit [Source:HGNC Symbol;Acc:HGNC:3798]	28709	-0.106663	-0.524452	No
DDIT3	DNA damage inducible transcript 3 [Source:HGNC Symbol;Acc:HGNC:2726]	28711	-0.106681	-0.523847	No
NR3C1	nuclear receptor subfamily 3 group C member 1 [Source:HGNC Symbol;Acc:HGNC:7978]	28778	-0.110072	-0.524881	No
BGN	biglycan [Source:HGNC Symbol;Acc:HGNC:1044]	28910	-0.11749	-0.527528	No
AMPD3	adenosine monophosphate deaminase 3 [Source:HGNC Symbol;Acc:HGNC:470]	29029	-0.123992	-0.529805	No
ILVBL	ilvB acetolactate synthase like [Source:HGNC Symbol;Acc:HGNC:6041]	29098	-0.127843	-0.530784	No
GCK	glucokinase [Source:HGNC Symbol;Acc:HGNC:4195]	29440	-0.150512	-0.538593	No
TKTL1	transketolase like 1 [Source:HGNC Symbol;Acc:HGNC:11835]	29721	-0.166382	-0.544752	No
CAVIN3	caveolae associated protein 3 [Source:HGNC Symbol;Acc:HGNC:9400]	29785	-0.169751	-0.545356	No
VHL	von Hippel-Lindau tumor suppressor [Source:HGNC Symbol;Acc:HGNC:12687]	29907	-0.177839	-0.547392	No
PKLR	pyruvate kinase L/R [Source:HGNC Symbol;Acc:HGNC:9020]	29924	-0.179122	-0.546742	No
MT1E	metallothionein 1E [Source:HGNC Symbol;Acc:HGNC:7397]	30074	-0.18799	-0.549432	No
NDST2	N-deacetylase and N-sulfotransferase 2 [Source:HGNC Symbol;Acc:HGNC:7681]	30113	-0.190464	-0.549276	No
IGFBP1	insulin like growth factor binding protein 1 [Source:HGNC Symbol;Acc:HGNC:5469]	30333	-0.201984	-0.553668	No
GRHPR	glyoxylate and hydroxypyruvate reductase [Source:HGNC Symbol;Acc:HGNC:4570]	30772	-0.23151	-0.563472	No
ZNF292	zinc finger protein 292 [Source:HGNC Symbol;Acc:HGNC:18410]	31193	-0.25042	-0.572706	No
UGP2	UDP-glucose pyrophosphorylase 2 [Source:HGNC Symbol;Acc:HGNC:12527]	31565	-0.274062	-0.58055	No
PGF	placental growth factor [Source:HGNC Symbol;Acc:HGNC:8893]	31669	-0.282884	-0.581506	No
HSPA5	heat shock protein family A (Hsp70) member 5 [Source:HGNC Symbol;Acc:HGNC:5238]	31828	-0.296821	-0.583782	No
BCL2	BCL2 apoptosis regulator [Source:HGNC Symbol;Acc:HGNC:990]	32179	-0.324181	-0.590794	No
CDKN1A	cyclin dependent kinase inhibitor 1A [Source:HGNC Symbol;Acc:HGNC:1784]	32201	-0.326135	-0.589404	No
RBPJ	recombination signal binding protein for immunoglobulin kappa J region [Source:HGNC Symbol;Acc:HGNC:5724]	32229	-0.328881	-0.58815	No
FBP1	fructose-bisphosphatase 1 [Source:HGNC Symbol;Acc:HGNC:3606]	33141	-0.393301	-0.609062	No
KLF7	Kruppel like factor 7 [Source:HGNC Symbol;Acc:HGNC:6350]	33180	-0.3962	-0.607691	No
LARGE1	LARGE xylosyl- and glucuronyltransferase 1 [Source:HGNC Symbol;Acc:HGNC:6511]	33745	-0.418439	-0.619605	No
HDLBP	high density lipoprotein binding protein [Source:HGNC Symbol;Acc:HGNC:4857]	33959	-0.438203	-0.622449	No
PRDX5	peroxiredoxin 5 [Source:HGNC Symbol;Acc:HGNC:9355]	34518	-0.468124	-0.633916	No
ANKZF1	ankyrin repeat and zinc finger peptidyl tRNA hydrolase 1 [Source:HGNC Symbol;Acc:HGNC:25527]	34617	-0.478443	-0.63359	No
EDN2	endothelin 2 [Source:HGNC Symbol;Acc:HGNC:3177]	35239	-0.515943	-0.646381	Yes
PCK1	phosphoenolpyruvate carboxykinase 1 [Source:HGNC Symbol;Acc:HGNC:8724]	35301	-0.523797	-0.644843	Yes
JMJD6	jumonji domain containing 6, arginine demethylase and lysine hydroxylase [Source:HGNC Symbol;Acc:HGNC:19355]	35328	-0.52684	-0.642394	Yes
LDHC	lactate dehydrogenase C [Source:HGNC Symbol;Acc:HGNC:6544]	35409	-0.534223	-0.641279	Yes
GBE1	1,4-alpha-glucan branching enzyme 1 [Source:HGNC Symbol;Acc:HGNC:4180]	35515	-0.546115	-0.640732	Yes
RORA	RAR related orphan receptor A [Source:HGNC Symbol;Acc:HGNC:10258]	35529	-0.547675	-0.637828	Yes
NFIL3	nuclear factor, interleukin 3 regulated [Source:HGNC Symbol;Acc:HGNC:7787]	35609	-0.559184	-0.63654	Yes
SDC2	syndecan 2 [Source:HGNC Symbol;Acc:HGNC:10659]	35627	-0.561693	-0.633656	Yes
BCAN	brevican [Source:HGNC Symbol;Acc:HGNC:23059]	35720	-0.575211	-0.632605	Yes
ANGPTL4	angiopoietin like 4 [Source:HGNC Symbol;Acc:HGNC:16039]	35772	-0.583565	-0.630459	Yes
TIPARP	TCDD inducible poly(ADP-ribose) polymerase [Source:HGNC Symbol;Acc:HGNC:23696]	35839	-0.595809	-0.628623	Yes
PPARGC1A	PPARG coactivator 1 alpha [Source:HGNC Symbol;Acc:HGNC:9237]	35841	-0.596289	-0.625126	Yes
SLC6A6	solute carrier family 6 member 6 [Source:HGNC Symbol;Acc:HGNC:11052]	35867	-0.601325	-0.622212	Yes
IRS2	insulin receptor substrate 2 [Source:HGNC Symbol;Acc:HGNC:6126]	35960	-0.61727	-0.620913	Yes
ISG20	interferon stimulated exonuclease gene 20 [Source:HGNC Symbol;Acc:HGNC:6130]	36030	-0.627404	-0.618967	Yes
DUSP1	dual specificity phosphatase 1 [Source:HGNC Symbol;Acc:HGNC:3064]	36091	-0.637359	-0.616732	Yes
HOXB9	homeobox B9 [Source:HGNC Symbol;Acc:HGNC:5120]	36124	-0.644642	-0.613741	Yes
WSB1	WD repeat and SOCS box containing 1 [Source:HGNC Symbol;Acc:HGNC:19221]	36182	-0.655061	-0.611325	Yes
STC1	stanniocalcin 1 [Source:HGNC Symbol;Acc:HGNC:11373]	36208	-0.659134	-0.60807	Yes
SLC25A1	solute carrier family 25 member 1 [Source:HGNC Symbol;Acc:HGNC:10979]	36365	-0.689413	-0.607976	Yes
SELENBP1	selenium binding protein 1 [Source:HGNC Symbol;Acc:HGNC:10719]	36378	-0.691827	-0.604196	Yes
PGM2	phosphoglucomutase 2 [Source:HGNC Symbol;Acc:HGNC:8906]	36503	-0.708629	-0.603173	Yes
SLC37A4	solute carrier family 37 member 4 [Source:HGNC Symbol;Acc:HGNC:4061]	36560	-0.719557	-0.600351	Yes
PFKL	phosphofructokinase, liver type [Source:HGNC Symbol;Acc:HGNC:8876]	36570	-0.720697	-0.596324	Yes
MT2A	metallothionein 2A [Source:HGNC Symbol;Acc:HGNC:7406]	36631	-0.734678	-0.593514	Yes
CCN2	cellular communication network factor 2 [Source:HGNC Symbol;Acc:HGNC:2500]	36741	-0.758855	-0.591812	Yes
SIAH2	siah E3 ubiquitin protein ligase 2 [Source:HGNC Symbol;Acc:HGNC:10858]	36872	-0.790858	-0.590457	Yes
RRAGD	Ras related GTP binding D [Source:HGNC Symbol;Acc:HGNC:19903]	36911	-0.798641	-0.586708	Yes
KLF6	Kruppel like factor 6 [Source:HGNC Symbol;Acc:HGNC:2235]	36932	-0.805178	-0.582463	Yes
IL6	interleukin 6 [Source:HGNC Symbol;Acc:HGNC:6018]	36985	-0.812678	-0.578989	Yes
PAM	peptidylglycine alpha-amidating monooxygenase [Source:HGNC Symbol;Acc:HGNC:8596]	37112	-0.836275	-0.577263	Yes
PGM1	phosphoglucomutase 1 [Source:HGNC Symbol;Acc:HGNC:8905]	37114	-0.837022	-0.572344	Yes
MXI1	MAX interactor 1, dimerization protein [Source:HGNC Symbol;Acc:HGNC:7534]	37193	-0.858606	-0.569262	Yes
SDC3	syndecan 3 [Source:HGNC Symbol;Acc:HGNC:10660]	37227	-0.865744	-0.56499	Yes
BNIP3L	BCL2 interacting protein 3 like [Source:HGNC Symbol;Acc:HGNC:1085]	37241	-0.868934	-0.560189	Yes
TES	testin LIM domain protein [Source:HGNC Symbol;Acc:HGNC:14620]	37254	-0.87247	-0.555342	Yes
P4HA1	prolyl 4-hydroxylase subunit alpha 1 [Source:HGNC Symbol;Acc:HGNC:8546]	37295	-0.885687	-0.55113	Yes
FOS	Fos proto-oncogene, AP-1 transcription factor subunit [Source:HGNC Symbol;Acc:HGNC:3796]	37304	-0.887981	-0.54609	Yes
IER3	immediate early response 3 [Source:HGNC Symbol;Acc:HGNC:5392]	37310	-0.889489	-0.540963	Yes
CXCR4	C-X-C motif chemokine receptor 4 [Source:HGNC Symbol;Acc:HGNC:2561]	37316	-0.891576	-0.535824	Yes
MYH9	myosin heavy chain 9 [Source:HGNC Symbol;Acc:HGNC:7579]	37387	-0.915354	-0.532203	Yes
PFKFB3	6-phosphofructo-2-kinase/fructose-2,6-biphosphatase 3 [Source:HGNC Symbol;Acc:HGNC:8874]	37428	-0.931991	-0.527718	Yes
AKAP12	A-kinase anchoring protein 12 [Source:HGNC Symbol;Acc:HGNC:370]	37457	-0.936045	-0.522903	Yes
MAFF	MAF bZIP transcription factor F [Source:HGNC Symbol;Acc:HGNC:6780]	37500	-0.945375	-0.518391	Yes
TPD52	tumor protein D52 [Source:HGNC Symbol;Acc:HGNC:12005]	37513	-0.948569	-0.513094	Yes
EFNA3	ephrin A3 [Source:HGNC Symbol;Acc:HGNC:3223]	37517	-0.949492	-0.507562	Yes
LDHA	lactate dehydrogenase A [Source:HGNC Symbol;Acc:HGNC:6535]	37673	-1.0122	-0.505536	Yes
DDIT4	DNA damage inducible transcript 4 [Source:HGNC Symbol;Acc:HGNC:24944]	37711	-1.02303	-0.500437	Yes
TMEM45A	transmembrane protein 45A [Source:HGNC Symbol;Acc:HGNC:25480]	37740	-1.03592	-0.495033	Yes
SRPX	sushi repeat containing protein X-linked [Source:HGNC Symbol;Acc:HGNC:11309]	37756	-1.04334	-0.489252	Yes
KDELR3	KDEL endoplasmic reticulum protein retention receptor 3 [Source:HGNC Symbol;Acc:HGNC:6306]	37802	-1.06009	-0.484139	Yes
SULT2B1	sulfotransferase family 2B member 1 [Source:HGNC Symbol;Acc:HGNC:11459]	37882	-1.09249	-0.4797	Yes
SAP30	Sin3A associated protein 30 [Source:HGNC Symbol;Acc:HGNC:10532]	37883	-1.09284	-0.473245	Yes
ATF3	activating transcription factor 3 [Source:HGNC Symbol;Acc:HGNC:785]	37892	-1.09632	-0.466974	Yes
COL5A1	collagen type V alpha 1 chain [Source:HGNC Symbol;Acc:HGNC:2209]	37917	-1.10786	-0.461042	Yes
NDRG1	N-myc downstream regulated 1 [Source:HGNC Symbol;Acc:HGNC:7679]	37920	-1.10825	-0.454547	Yes
NOCT	nocturnin [Source:HGNC Symbol;Acc:HGNC:14254]	37954	-1.12234	-0.448759	Yes
SCARB1	scavenger receptor class B member 1 [Source:HGNC Symbol;Acc:HGNC:1664]	37978	-1.133	-0.442654	Yes
ENO1	enolase 1 [Source:HGNC Symbol;Acc:HGNC:3350]	37982	-1.13459	-0.436028	Yes
INHA	inhibin subunit alpha [Source:HGNC Symbol;Acc:HGNC:6065]	38038	-1.16198	-0.430568	Yes
GALK1	galactokinase 1 [Source:HGNC Symbol;Acc:HGNC:4118]	38039	-1.16298	-0.423698	Yes
ALDOC	aldolase, fructose-bisphosphate C [Source:HGNC Symbol;Acc:HGNC:418]	38044	-1.1665	-0.41691	Yes
PDK1	pyruvate dehydrogenase kinase 1 [Source:HGNC Symbol;Acc:HGNC:8809]	38086	-1.18548	-0.410954	Yes
AK4	adenylate kinase 4 [Source:HGNC Symbol;Acc:HGNC:363]	38171	-1.23029	-0.405829	Yes
HK1	hexokinase 1 [Source:HGNC Symbol;Acc:HGNC:4922]	38211	-1.25286	-0.399424	Yes
CCN1	cellular communication network factor 1 [Source:HGNC Symbol;Acc:HGNC:2654]	38212	-1.25291	-0.392023	Yes
SLC2A5	solute carrier family 2 member 5 [Source:HGNC Symbol;Acc:HGNC:11010]	38234	-1.26447	-0.38509	Yes
PDK3	pyruvate dehydrogenase kinase 3 [Source:HGNC Symbol;Acc:HGNC:8811]	38251	-1.28017	-0.377936	Yes
LOX	lysyl oxidase [Source:HGNC Symbol;Acc:HGNC:6664]	38273	-1.2935	-0.370831	Yes
PPFIA4	PTPRF interacting protein alpha 4 [Source:HGNC Symbol;Acc:HGNC:9248]	38274	-1.29362	-0.36319	Yes
STC2	stanniocalcin 2 [Source:HGNC Symbol;Acc:HGNC:11374]	38295	-1.30417	-0.355997	Yes
EFNA1	ephrin A1 [Source:HGNC Symbol;Acc:HGNC:3221]	38298	-1.30532	-0.348338	Yes
PIM1	Pim-1 proto-oncogene, serine/threonine kinase [Source:HGNC Symbol;Acc:HGNC:8986]	38302	-1.30924	-0.340681	Yes
GYS1	glycogen synthase 1 [Source:HGNC Symbol;Acc:HGNC:4706]	38362	-1.34704	-0.334229	Yes
FAM162A	family with sequence similarity 162 member A [Source:HGNC Symbol;Acc:HGNC:17865]	38371	-1.35044	-0.326457	Yes
ERRFI1	ERBB receptor feedback inhibitor 1 [Source:HGNC Symbol;Acc:HGNC:18185]	38377	-1.35832	-0.318561	Yes
ADM	adrenomedullin [Source:HGNC Symbol;Acc:HGNC:259]	38392	-1.37031	-0.310824	Yes
GLRX	glutaredoxin [Source:HGNC Symbol;Acc:HGNC:4330]	38407	-1.38447	-0.303004	Yes
TPI1	triosephosphate isomerase 1 [Source:HGNC Symbol;Acc:HGNC:12009]	38432	-1.40462	-0.295319	Yes
GPC3	glypican 3 [Source:HGNC Symbol;Acc:HGNC:4451]	38440	-1.41177	-0.287159	Yes
HK2	hexokinase 2 [Source:HGNC Symbol;Acc:HGNC:4923]	38521	-1.48296	-0.28044	Yes
CP	ceruloplasmin [Source:HGNC Symbol;Acc:HGNC:2295]	38559	-1.50688	-0.272483	Yes
SLC2A1	solute carrier family 2 member 1 [Source:HGNC Symbol;Acc:HGNC:11005]	38615	-1.55248	-0.264715	Yes
ADORA2B	adenosine A2b receptor [Source:HGNC Symbol;Acc:HGNC:264]	38619	-1.55539	-0.255605	Yes
P4HA2	prolyl 4-hydroxylase subunit alpha 2 [Source:HGNC Symbol;Acc:HGNC:8547]	38628	-1.5631	-0.246576	Yes
PGK1	phosphoglycerate kinase 1 [Source:HGNC Symbol;Acc:HGNC:8896]	38674	-1.60498	-0.238243	Yes
EGFR	epidermal growth factor receptor [Source:HGNC Symbol;Acc:HGNC:3236]	38685	-1.61155	-0.22898	Yes
CHST3	carbohydrate sulfotransferase 3 [Source:HGNC Symbol;Acc:HGNC:1971]	38687	-1.61352	-0.219474	Yes
ZFP36	ZFP36 ring finger protein [Source:HGNC Symbol;Acc:HGNC:12862]	38704	-1.62917	-0.210259	Yes
GPI	glucose-6-phosphate isomerase [Source:HGNC Symbol;Acc:HGNC:4458]	38710	-1.63988	-0.200701	Yes
ERO1A	endoplasmic reticulum oxidoreductase 1 alpha [Source:HGNC Symbol;Acc:HGNC:13280]	38720	-1.65329	-0.191165	Yes
VEGFA	vascular endothelial growth factor A [Source:HGNC Symbol;Acc:HGNC:12680]	38776	-1.7224	-0.182394	Yes
MAP3K1	mitogen-activated protein kinase kinase kinase 1 [Source:HGNC Symbol;Acc:HGNC:6848]	38777	-1.72249	-0.17222	Yes
PFKP	phosphofructokinase, platelet [Source:HGNC Symbol;Acc:HGNC:8878]	38835	-1.80739	-0.162998	Yes
ALDOA	aldolase, fructose-bisphosphate A [Source:HGNC Symbol;Acc:HGNC:414]	38841	-1.8143	-0.152409	Yes
ANXA2	annexin A2 [Source:HGNC Symbol;Acc:HGNC:537]	38856	-1.83653	-0.141918	Yes
CAV1	caveolin 1 [Source:HGNC Symbol;Acc:HGNC:1527]	38861	-1.84177	-0.131141	Yes
STBD1	starch binding domain 1 [Source:HGNC Symbol;Acc:HGNC:24854]	38882	-1.86347	-0.120644	Yes
BHLHE40	basic helix-loop-helix family member e40 [Source:HGNC Symbol;Acc:HGNC:1046]	38929	-1.92128	-0.110469	Yes
CA12	carbonic anhydrase 12 [Source:HGNC Symbol;Acc:HGNC:1371]	38941	-1.93774	-0.0993038	Yes
SLC2A3	solute carrier family 2 member 3 [Source:HGNC Symbol;Acc:HGNC:11007]	38980	-1.97157	-0.0886275	Yes
GPC1	glypican 1 [Source:HGNC Symbol;Acc:HGNC:4449]	39039	-2.05663	-0.0779589	Yes
S100A4	S100 calcium binding protein A4 [Source:HGNC Symbol;Acc:HGNC:10494]	39072	-2.11789	-0.0662653	Yes
ENO2	enolase 2 [Source:HGNC Symbol;Acc:HGNC:3353]	39088	-2.13697	-0.0540254	Yes
PPP1R3C	protein phosphatase 1 regulatory subunit 3C [Source:HGNC Symbol;Acc:HGNC:9293]	39122	-2.19493	-0.0419022	Yes
GPC4	glypican 4 [Source:HGNC Symbol;Acc:HGNC:4452]	39165	-2.26954	-0.0295679	Yes
GAPDH	glyceraldehyde-3-phosphate dehydrogenase [Source:HGNC Symbol;Acc:HGNC:4141]	39201	-2.3509	-0.0165745	Yes
F3	coagulation factor III, tissue factor [Source:HGNC Symbol;Acc:HGNC:3541]	39391	-3.68695	0.00038271	Yes

## Sheet: MYC_Targets_V1
SYMBOL	TITLE	RANK IN GENE LIST	RANK METRIC SCORE	RUNNING ES	CORE ENRICHMENT
APEX1	apurinic/apyrimidinic endodeoxyribonuclease 1 [Source:HGNC Symbol;Acc:HGNC:587]	2463	0.841043	-0.0527418	No
PSMA2	proteasome 20S subunit alpha 2 [Source:HGNC Symbol;Acc:HGNC:9531]	3292	0.712196	-0.0653259	No
EIF4A1	eukaryotic translation initiation factor 4A1 [Source:HGNC Symbol;Acc:HGNC:3282]	4126	0.623227	-0.0791037	No
SMARCC1	SWI/SNF related, matrix associated, actin dependent regulator of chromatin subfamily c member 1 [Source:HGNC Symbol;Acc:HGNC:11104]	4715	0.553106	-0.0874729	No
RPL22	ribosomal protein L22 [Source:HGNC Symbol;Acc:HGNC:10315]	5445	0.490938	-0.100183	No
HNRNPA2B1	heterogeneous nuclear ribonucleoprotein A2/B1 [Source:HGNC Symbol;Acc:HGNC:5033]	5818	0.4571	-0.104194	No
SNRPD3	small nuclear ribonucleoprotein D3 polypeptide [Source:HGNC Symbol;Acc:HGNC:11160]	6283	0.441836	-0.110734	No
EIF4G2	eukaryotic translation initiation factor 4 gamma 2 [Source:HGNC Symbol;Acc:HGNC:3297]	6327	0.437578	-0.106587	No
RRP9	ribosomal RNA processing 9, U3 small nucleolar RNA binding protein [Source:HGNC Symbol;Acc:HGNC:16829]	6906	0.420264	-0.116293	No
ODC1	ornithine decarboxylase 1 [Source:HGNC Symbol;Acc:HGNC:8109]	9826	0.281049	-0.187376	No
HNRNPU	heterogeneous nuclear ribonucleoprotein U [Source:HGNC Symbol;Acc:HGNC:5048]	10054	0.266311	-0.189974	No
COPS5	COP9 signalosome subunit 5 [Source:HGNC Symbol;Acc:HGNC:2240]	10118	0.261091	-0.188452	No
CBX3	chromobox 3 [Source:HGNC Symbol;Acc:HGNC:1553]	10358	0.243892	-0.191626	No
BUB3	BUB3 mitotic checkpoint protein [Source:HGNC Symbol;Acc:HGNC:1151]	10441	0.238909	-0.190854	No
HDAC2	histone deacetylase 2 [Source:HGNC Symbol;Acc:HGNC:4853]	10792	0.214034	-0.197216	No
ORC2	origin recognition complex subunit 2 [Source:HGNC Symbol;Acc:HGNC:8488]	11159	0.19171	-0.204254	No
NCBP2	nuclear cap binding protein subunit 2 [Source:HGNC Symbol;Acc:HGNC:7659]	11433	0.171862	-0.209157	No
CAD	carbamoyl-phosphate synthetase 2, aspartate transcarbamylase, and dihydroorotase [Source:HGNC Symbol;Acc:HGNC:1424]	11781	0.151879	-0.216188	No
NCBP1	nuclear cap binding protein subunit 1 [Source:HGNC Symbol;Acc:HGNC:7658]	11818	0.150974	-0.215297	No
RPL6	ribosomal protein L6 [Source:HGNC Symbol;Acc:HGNC:10362]	12022	0.138269	-0.218818	No
NAP1L1	nucleosome assembly protein 1 like 1 [Source:HGNC Symbol;Acc:HGNC:7637]	12257	0.124495	-0.223294	No
EIF1AX	eukaryotic translation initiation factor 1A X-linked [Source:HGNC Symbol;Acc:HGNC:3250]	12289	0.122438	-0.222617	No
ILF2	interleukin enhancer binding factor 2 [Source:HGNC Symbol;Acc:HGNC:6037]	12408	0.114904	-0.22425	No
SF3A1	splicing factor 3a subunit 1 [Source:HGNC Symbol;Acc:HGNC:10765]	12913	0.0880082	-0.23605	No
AIMP2	aminoacyl tRNA synthetase complex interacting multifunctional protein 2 [Source:HGNC Symbol;Acc:HGNC:20609]	12964	0.0844866	-0.236313	No
NOP56	NOP56 ribonucleoprotein [Source:HGNC Symbol;Acc:HGNC:15911]	13001	0.0815519	-0.236254	No
PSMC4	proteasome 26S subunit, ATPase 4 [Source:HGNC Symbol;Acc:HGNC:9551]	13203	0.0716227	-0.240523	No
HNRNPA3	heterogeneous nuclear ribonucleoprotein A3 [Source:HGNC Symbol;Acc:HGNC:24941]	13257	0.0677694	-0.241062	No
HDGF	heparin binding growth factor [Source:HGNC Symbol;Acc:HGNC:4856]	13270	0.0666246	-0.24057	No
TARDBP	TAR DNA binding protein [Source:HGNC Symbol;Acc:HGNC:11571]	13390	0.0581783	-0.242908	No
SSB	small RNA binding exonuclease protection factor La [Source:HGNC Symbol;Acc:HGNC:11316]	13612	0.0489053	-0.247959	No
SNRPB2	small nuclear ribonucleoprotein polypeptide B2 [Source:HGNC Symbol;Acc:HGNC:11155]	13640	0.0463323	-0.248092	No
SF3B3	splicing factor 3b subunit 3 [Source:HGNC Symbol;Acc:HGNC:10770]	13714	0.0418158	-0.249453	No
SRPK1	SRSF protein kinase 1 [Source:HGNC Symbol;Acc:HGNC:11305]	13834	0.0336153	-0.252085	No
PSMD14	proteasome 26S subunit, non-ATPase 14 [Source:HGNC Symbol;Acc:HGNC:16889]	13895	0.0293214	-0.253264	No
PSMC6	proteasome 26S subunit, ATPase 6 [Source:HGNC Symbol;Acc:HGNC:9553]	13988	0.0247499	-0.255314	No
TCP1	t-complex 1 [Source:HGNC Symbol;Acc:HGNC:11655]	14062	0.0221111	-0.256911	No
RPS6	ribosomal protein S6 [Source:HGNC Symbol;Acc:HGNC:10429]	14076	0.0212572	-0.256988	No
PABPC1	poly(A) binding protein cytoplasmic 1 [Source:HGNC Symbol;Acc:HGNC:8554]	14227	0.0110102	-0.260682	No
RPL34	ribosomal protein L34 [Source:HGNC Symbol;Acc:HGNC:10340]	14265	0.00870258	-0.261521	No
ABCE1	ATP binding cassette subfamily E member 1 [Source:HGNC Symbol;Acc:HGNC:69]	14277	0.00802601	-0.261706	No
HNRNPA1	heterogeneous nuclear ribonucleoprotein A1 [Source:HGNC Symbol;Acc:HGNC:5031]	14309	0.00574086	-0.262427	No
PABPC4	poly(A) binding protein cytoplasmic 4 [Source:HGNC Symbol;Acc:HGNC:8557]	14339	0.0040105	-0.263119	No
EIF3J	eukaryotic translation initiation factor 3 subunit J [Source:HGNC Symbol;Acc:HGNC:3270]	26782	-0.00405285	-0.580412	No
U2AF1	U2 small nuclear RNA auxiliary factor 1 [Source:HGNC Symbol;Acc:HGNC:12453]	26820	-0.00602711	-0.581283	No
PRPF31	pre-mRNA processing factor 31 [Source:HGNC Symbol;Acc:HGNC:15446]	26823	-0.00610505	-0.581261	No
NHP2	NHP2 ribonucleoprotein [Source:HGNC Symbol;Acc:HGNC:14377]	26877	-0.0101173	-0.582492	No
LSM2	LSM2 homolog, U6 small nuclear RNA and mRNA degradation associated [Source:HGNC Symbol;Acc:HGNC:13940]	26975	-0.0145296	-0.584792	No
TOMM70	translocase of outer mitochondrial membrane 70 [Source:HGNC Symbol;Acc:HGNC:11985]	27004	-0.0160843	-0.585313	No
SRSF2	serine and arginine rich splicing factor 2 [Source:HGNC Symbol;Acc:HGNC:10783]	27331	-0.033276	-0.593229	No
NOP16	NOP16 nucleolar protein [Source:HGNC Symbol;Acc:HGNC:26934]	27335	-0.0334515	-0.592905	No
SRSF3	serine and arginine rich splicing factor 3 [Source:HGNC Symbol;Acc:HGNC:10785]	27449	-0.0407799	-0.595298	No
HSP90AB1	heat shock protein 90 alpha family class B member 1 [Source:HGNC Symbol;Acc:HGNC:5258]	27481	-0.0423784	-0.595581	No
PHB2	prohibitin 2 [Source:HGNC Symbol;Acc:HGNC:30306]	27587	-0.0480388	-0.597683	No
SRM	spermidine synthase [Source:HGNC Symbol;Acc:HGNC:11296]	27838	-0.0611631	-0.603327	No
TRA2B	transformer 2 beta homolog [Source:HGNC Symbol;Acc:HGNC:10781]	27870	-0.062356	-0.60337	No
SET	SET nuclear proto-oncogene [Source:HGNC Symbol;Acc:HGNC:10760]	27874	-0.0628368	-0.602694	No
HSPE1	heat shock protein family E (Hsp10) member 1 [Source:HGNC Symbol;Acc:HGNC:5269]	27889	-0.0637789	-0.602287	No
PSMA4	proteasome 20S subunit alpha 4 [Source:HGNC Symbol;Acc:HGNC:9533]	28013	-0.0681489	-0.604607	No
PSMD1	proteasome 26S subunit, non-ATPase 1 [Source:HGNC Symbol;Acc:HGNC:9554]	28101	-0.0732996	-0.605948	No
UBE2E1	ubiquitin conjugating enzyme E2 E1 [Source:HGNC Symbol;Acc:HGNC:12477]	28150	-0.0752315	-0.606271	No
RPS5	ribosomal protein S5 [Source:HGNC Symbol;Acc:HGNC:10426]	28198	-0.0784109	-0.60653	No
SRSF1	serine and arginine rich splicing factor 1 [Source:HGNC Symbol;Acc:HGNC:10780]	28226	-0.0802349	-0.606257	No
CCT7	chaperonin containing TCP1 subunit 7 [Source:HGNC Symbol;Acc:HGNC:1622]	28414	-0.0905663	-0.609941	No
SYNCRIP	synaptotagmin binding cytoplasmic RNA interacting protein [Source:HGNC Symbol;Acc:HGNC:16918]	28450	-0.0918349	-0.609733	No
PWP1	PWP1 homolog, endonuclein [Source:HGNC Symbol;Acc:HGNC:17015]	28564	-0.0968718	-0.611455	No
CUL1	cullin 1 [Source:HGNC Symbol;Acc:HGNC:2551]	28706	-0.106585	-0.613774	No
HNRNPR	heterogeneous nuclear ribonucleoprotein R [Source:HGNC Symbol;Acc:HGNC:5047]	28716	-0.106937	-0.612722	No
PSMD7	proteasome 26S subunit, non-ATPase 7 [Source:HGNC Symbol;Acc:HGNC:9565]	28863	-0.114941	-0.615068	No
HNRNPD	heterogeneous nuclear ribonucleoprotein D [Source:HGNC Symbol;Acc:HGNC:5036]	28917	-0.117999	-0.615006	No
TUFM	Tu translation elongation factor, mitochondrial [Source:HGNC Symbol;Acc:HGNC:12420]	28929	-0.118809	-0.613863	No
DHX15	DEAH-box helicase 15 [Source:HGNC Symbol;Acc:HGNC:2738]	28930	-0.118879	-0.612438	No
EEF1B2	eukaryotic translation elongation factor 1 beta 2 [Source:HGNC Symbol;Acc:HGNC:3208]	28955	-0.120554	-0.611606	No
CCT2	chaperonin containing TCP1 subunit 2 [Source:HGNC Symbol;Acc:HGNC:1615]	28974	-0.121627	-0.610607	No
CDK4	cyclin dependent kinase 4 [Source:HGNC Symbol;Acc:HGNC:1773]	29006	-0.122394	-0.609931	No
RACK1	receptor for activated C kinase 1 [Source:HGNC Symbol;Acc:HGNC:4399]	29041	-0.124564	-0.609306	No
RPL14	ribosomal protein L14 [Source:HGNC Symbol;Acc:HGNC:10305]	29187	-0.133514	-0.611404	No
RPS3	ribosomal protein S3 [Source:HGNC Symbol;Acc:HGNC:10420]	29619	-0.159916	-0.620481	No
IARS1	isoleucyl-tRNA synthetase 1 [Source:HGNC Symbol;Acc:HGNC:5330]	29862	-0.17507	-0.624555	No
RNPS1	RNA binding protein with serine rich domain 1 [Source:HGNC Symbol;Acc:HGNC:10080]	30049	-0.186319	-0.627066	Yes
XRCC6	X-ray repair cross complementing 6 [Source:HGNC Symbol;Acc:HGNC:4055]	30102	-0.190021	-0.626116	Yes
TRIM28	tripartite motif containing 28 [Source:HGNC Symbol;Acc:HGNC:16384]	30104	-0.190045	-0.623864	Yes
PSMD3	proteasome 26S subunit, non-ATPase 3 [Source:HGNC Symbol;Acc:HGNC:9560]	30191	-0.194344	-0.623728	Yes
PSMB3	proteasome 20S subunit beta 3 [Source:HGNC Symbol;Acc:HGNC:9540]	30302	-0.201859	-0.624115	Yes
CNBP	CCHC-type zinc finger nucleic acid binding protein [Source:HGNC Symbol;Acc:HGNC:13164]	30310	-0.201957	-0.621873	Yes
CLNS1A	chloride nucleotide-sensitive channel 1A [Source:HGNC Symbol;Acc:HGNC:2080]	30383	-0.20466	-0.621257	Yes
PSMD8	proteasome 26S subunit, non-ATPase 8 [Source:HGNC Symbol;Acc:HGNC:9566]	30406	-0.206113	-0.619348	Yes
SLC25A3	solute carrier family 25 member 3 [Source:HGNC Symbol;Acc:HGNC:10989]	30494	-0.213044	-0.619014	Yes
SSBP1	single stranded DNA binding protein 1 [Source:HGNC Symbol;Acc:HGNC:11317]	30576	-0.219103	-0.618455	Yes
IFRD1	interferon related developmental regulator 1 [Source:HGNC Symbol;Acc:HGNC:5456]	30607	-0.220428	-0.616578	Yes
EIF3D	eukaryotic translation initiation factor 3 subunit D [Source:HGNC Symbol;Acc:HGNC:3278]	30621	-0.220973	-0.614262	Yes
HNRNPC	heterogeneous nuclear ribonucleoprotein C [Source:HGNC Symbol;Acc:HGNC:5035]	30716	-0.228163	-0.613925	Yes
IMPDH2	inosine monophosphate dehydrogenase 2 [Source:HGNC Symbol;Acc:HGNC:6053]	30750	-0.230288	-0.612007	Yes
SERBP1	SERPINE1 mRNA binding protein 1 [Source:HGNC Symbol;Acc:HGNC:17860]	30761	-0.230955	-0.609495	Yes
KARS1	lysyl-tRNA synthetase 1 [Source:HGNC Symbol;Acc:HGNC:6215]	30790	-0.232653	-0.607421	Yes
MRPL9	mitochondrial ribosomal protein L9 [Source:HGNC Symbol;Acc:HGNC:14277]	30793	-0.23287	-0.604681	Yes
RPL18	ribosomal protein L18 [Source:HGNC Symbol;Acc:HGNC:10310]	30857	-0.238298	-0.603433	Yes
CCT3	chaperonin containing TCP1 subunit 3 [Source:HGNC Symbol;Acc:HGNC:1616]	30901	-0.241407	-0.601636	Yes
NPM1	nucleophosmin 1 [Source:HGNC Symbol;Acc:HGNC:7910]	30921	-0.242413	-0.599216	Yes
PRPS2	phosphoribosyl pyrophosphate synthetase 2 [Source:HGNC Symbol;Acc:HGNC:9465]	31006	-0.248517	-0.59838	Yes
MRPS18B	mitochondrial ribosomal protein S18B [Source:HGNC Symbol;Acc:HGNC:14516]	31007	-0.248609	-0.595401	Yes
HDDC2	HD domain containing 2 [Source:HGNC Symbol;Acc:HGNC:21078]	31211	-0.251548	-0.597564	Yes
RSL1D1	ribosomal L1 domain containing 1 [Source:HGNC Symbol;Acc:HGNC:24534]	31244	-0.253958	-0.595337	Yes
PPM1G	protein phosphatase, Mg2+/Mn2+ dependent 1G [Source:HGNC Symbol;Acc:HGNC:9278]	31266	-0.254898	-0.592818	Yes
RPS2	ribosomal protein S2 [Source:HGNC Symbol;Acc:HGNC:10404]	31379	-0.261163	-0.592545	Yes
SRSF7	serine and arginine rich splicing factor 7 [Source:HGNC Symbol;Acc:HGNC:10789]	31554	-0.272943	-0.593712	Yes
NME1	NME/NM23 nucleoside diphosphate kinase 1 [Source:HGNC Symbol;Acc:HGNC:7849]	31559	-0.273778	-0.590534	Yes
DDX21	DExD-box helicase 21 [Source:HGNC Symbol;Acc:HGNC:2744]	31568	-0.274359	-0.58745	Yes
GSPT1	G1 to S phase transition 1 [Source:HGNC Symbol;Acc:HGNC:4621]	31570	-0.27451	-0.584186	Yes
CTPS1	CTP synthase 1 [Source:HGNC Symbol;Acc:HGNC:2519]	31571	-0.274565	-0.580896	Yes
SNRPG	small nuclear ribonucleoprotein polypeptide G [Source:HGNC Symbol;Acc:HGNC:11163]	31750	-0.289253	-0.581969	Yes
VBP1	VHL binding protein 1 [Source:HGNC Symbol;Acc:HGNC:12662]	31783	-0.292612	-0.579279	Yes
ERH	ERH mRNA splicing and mitosis factor [Source:HGNC Symbol;Acc:HGNC:3447]	31794	-0.293742	-0.576014	Yes
EPRS1	glutamyl-prolyl-tRNA synthetase 1 [Source:HGNC Symbol;Acc:HGNC:3418]	31811	-0.295405	-0.572882	Yes
FAM120A	family with sequence similarity 120A [Source:HGNC Symbol;Acc:HGNC:13247]	31842	-0.297873	-0.570078	Yes
CCT4	chaperonin containing TCP1 subunit 4 [Source:HGNC Symbol;Acc:HGNC:1617]	31862	-0.299751	-0.56697	Yes
UBE2L3	ubiquitin conjugating enzyme E2 L3 [Source:HGNC Symbol;Acc:HGNC:12488]	31913	-0.303187	-0.564612	Yes
G3BP1	G3BP stress granule assembly factor 1 [Source:HGNC Symbol;Acc:HGNC:30292]	31929	-0.305	-0.56134	Yes
PTGES3	prostaglandin E synthase 3 [Source:HGNC Symbol;Acc:HGNC:16049]	31947	-0.306608	-0.558099	Yes
PSMA7	proteasome 20S subunit alpha 7 [Source:HGNC Symbol;Acc:HGNC:9536]	31994	-0.310488	-0.555552	Yes
XPO1	exportin 1 [Source:HGNC Symbol;Acc:HGNC:12825]	32016	-0.311939	-0.552349	Yes
ETF1	eukaryotic translation termination factor 1 [Source:HGNC Symbol;Acc:HGNC:3477]	32054	-0.315142	-0.549517	Yes
POLE3	DNA polymerase epsilon 3, accessory subunit [Source:HGNC Symbol;Acc:HGNC:13546]	32202	-0.326259	-0.549356	Yes
CSTF2	cleavage stimulation factor subunit 2 [Source:HGNC Symbol;Acc:HGNC:2484]	32218	-0.327652	-0.545813	Yes
HSPD1	heat shock protein family D (Hsp60) member 1 [Source:HGNC Symbol;Acc:HGNC:5261]	32256	-0.332183	-0.542775	Yes
DDX18	DEAD-box helicase 18 [Source:HGNC Symbol;Acc:HGNC:2741]	32304	-0.334782	-0.539962	Yes
SNRPA	small nuclear ribonucleoprotein polypeptide A [Source:HGNC Symbol;Acc:HGNC:11151]	32376	-0.340304	-0.537695	Yes
RAN	RAN, member RAS oncogene family [Source:HGNC Symbol;Acc:HGNC:9846]	32398	-0.342168	-0.53413	Yes
GOT2	glutamic-oxaloacetic transaminase 2 [Source:HGNC Symbol;Acc:HGNC:4433]	32452	-0.34781	-0.531314	Yes
RPLP0	ribosomal protein lateral stalk subunit P0 [Source:HGNC Symbol;Acc:HGNC:10371]	32461	-0.349111	-0.527335	Yes
PPIA	peptidylprolyl isomerase A [Source:HGNC Symbol;Acc:HGNC:9253]	32678	-0.360137	-0.528528	Yes
ACP1	acid phosphatase 1 [Source:HGNC Symbol;Acc:HGNC:122]	32740	-0.365122	-0.525709	Yes
EIF2S1	eukaryotic translation initiation factor 2 subunit alpha [Source:HGNC Symbol;Acc:HGNC:3265]	32748	-0.365239	-0.52151	Yes
LSM7	LSM7 homolog, U6 small nuclear RNA and mRNA degradation associated [Source:HGNC Symbol;Acc:HGNC:20470]	32808	-0.370442	-0.518576	Yes
EXOSC7	exosome component 7 [Source:HGNC Symbol;Acc:HGNC:28112]	32878	-0.376735	-0.515821	Yes
USP1	ubiquitin specific peptidase 1 [Source:HGNC Symbol;Acc:HGNC:12607]	33012	-0.386822	-0.514578	Yes
PRDX3	peroxiredoxin 3 [Source:HGNC Symbol;Acc:HGNC:9354]	33032	-0.388653	-0.510405	Yes
PSMB2	proteasome 20S subunit beta 2 [Source:HGNC Symbol;Acc:HGNC:9539]	33202	-0.398174	-0.509944	Yes
PSMA6	proteasome 20S subunit alpha 6 [Source:HGNC Symbol;Acc:HGNC:9535]	33233	-0.400453	-0.505911	Yes
PHB	prohibitin [Source:HGNC Symbol;Acc:HGNC:8912]	33238	-0.401113	-0.501206	Yes
HPRT1	hypoxanthine phosphoribosyltransferase 1 [Source:HGNC Symbol;Acc:HGNC:5157]	33710	-0.415356	-0.508242	Yes
C1QBP	complement C1q binding protein [Source:HGNC Symbol;Acc:HGNC:1243]	33735	-0.417507	-0.503851	Yes
GLO1	glyoxalase I [Source:HGNC Symbol;Acc:HGNC:4323]	33805	-0.423327	-0.500538	Yes
NDUFAB1	NADH:ubiquinone oxidoreductase subunit AB1 [Source:HGNC Symbol;Acc:HGNC:7694]	33852	-0.427159	-0.496592	Yes
PA2G4	proliferation-associated 2G4 [Source:HGNC Symbol;Acc:HGNC:8550]	33856	-0.427476	-0.491546	Yes
SNRPD2	small nuclear ribonucleoprotein D2 polypeptide [Source:HGNC Symbol;Acc:HGNC:11159]	33865	-0.42825	-0.486618	Yes
KPNB1	karyopherin subunit beta 1 [Source:HGNC Symbol;Acc:HGNC:6400]	33871	-0.428986	-0.481605	Yes
XPOT	exportin for tRNA [Source:HGNC Symbol;Acc:HGNC:12826]	34005	-0.442951	-0.479689	Yes
SNRPD1	small nuclear ribonucleoprotein D1 polypeptide [Source:HGNC Symbol;Acc:HGNC:11158]	34158	-0.459436	-0.47806	Yes
EIF2S2	eukaryotic translation initiation factor 2 subunit beta [Source:HGNC Symbol;Acc:HGNC:3266]	34502	-0.466999	-0.481212	Yes
YWHAE	tyrosine 3-monooxygenase/tryptophan 5-monooxygenase activation protein epsilon [Source:HGNC Symbol;Acc:HGNC:12851]	34504	-0.467044	-0.475641	Yes
GNL3	G protein nucleolar 3 [Source:HGNC Symbol;Acc:HGNC:29931]	34576	-0.474625	-0.471764	Yes
POLD2	DNA polymerase delta 2, accessory subunit [Source:HGNC Symbol;Acc:HGNC:9176]	34728	-0.482735	-0.469831	Yes
EIF3B	eukaryotic translation initiation factor 3 subunit B [Source:HGNC Symbol;Acc:HGNC:3280]	34734	-0.483352	-0.464166	Yes
UBA2	ubiquitin like modifier activating enzyme 2 [Source:HGNC Symbol;Acc:HGNC:30661]	34956	-0.486967	-0.463967	Yes
MRPL23	mitochondrial ribosomal protein L23 [Source:HGNC Symbol;Acc:HGNC:10322]	35024	-0.494575	-0.45975	Yes
RPS10	ribosomal protein S10 [Source:HGNC Symbol;Acc:HGNC:10383]	35035	-0.495531	-0.454066	Yes
DUT	deoxyuridine triphosphatase [Source:HGNC Symbol;Acc:HGNC:3078]	35076	-0.501342	-0.449079	Yes
YWHAQ	tyrosine 3-monooxygenase/tryptophan 5-monooxygenase activation protein theta [Source:HGNC Symbol;Acc:HGNC:12854]	35159	-0.511093	-0.445046	Yes
EIF4E	eukaryotic translation initiation factor 4E [Source:HGNC Symbol;Acc:HGNC:3287]	35182	-0.514367	-0.439443	Yes
RAD23B	RAD23 homolog B, nucleotide excision repair protein [Source:HGNC Symbol;Acc:HGNC:9813]	35261	-0.517898	-0.435226	Yes
NOLC1	nucleolar and coiled-body phosphoprotein 1 [Source:HGNC Symbol;Acc:HGNC:15608]	35317	-0.525525	-0.430331	Yes
PSMA1	proteasome 20S subunit alpha 1 [Source:HGNC Symbol;Acc:HGNC:9530]	35360	-0.528024	-0.425075	Yes
CANX	calnexin [Source:HGNC Symbol;Acc:HGNC:1473]	35367	-0.528663	-0.418893	Yes
RANBP1	RAN binding protein 1 [Source:HGNC Symbol;Acc:HGNC:9847]	35403	-0.53378	-0.413389	Yes
CYC1	cytochrome c1 [Source:HGNC Symbol;Acc:HGNC:2579]	35415	-0.534361	-0.407266	Yes
EIF4H	eukaryotic translation initiation factor 4H [Source:HGNC Symbol;Acc:HGNC:12741]	35504	-0.544552	-0.402985	Yes
CCT5	chaperonin containing TCP1 subunit 5 [Source:HGNC Symbol;Acc:HGNC:1618]	35537	-0.548862	-0.397224	Yes
PCBP1	poly(rC) binding protein 1 [Source:HGNC Symbol;Acc:HGNC:8647]	35678	-0.56936	-0.393972	Yes
COX5A	cytochrome c oxidase subunit 5A [Source:HGNC Symbol;Acc:HGNC:2267]	35712	-0.573474	-0.387941	Yes
STARD7	StAR related lipid transfer domain containing 7 [Source:HGNC Symbol;Acc:HGNC:18063]	36095	-0.638408	-0.390034	Yes
AP3S1	adaptor related protein complex 3 subunit sigma 1 [Source:HGNC Symbol;Acc:HGNC:2013]	36098	-0.639022	-0.382427	Yes
RUVBL2	RuvB like AAA ATPase 2 [Source:HGNC Symbol;Acc:HGNC:10475]	36824	-0.778965	-0.391584	Yes
VDAC3	voltage dependent anion channel 3 [Source:HGNC Symbol;Acc:HGNC:12674]	36884	-0.793195	-0.383584	Yes
FBL	fibrillarin [Source:HGNC Symbol;Acc:HGNC:3599]	36915	-0.801018	-0.37475	Yes
SNRPA1	small nuclear ribonucleoprotein polypeptide A' [Source:HGNC Symbol;Acc:HGNC:11152]	36917	-0.801422	-0.365172	Yes
DEK	DEK proto-oncogene [Source:HGNC Symbol;Acc:HGNC:2768]	36994	-0.815536	-0.357337	Yes
TXNL4A	thioredoxin like 4A [Source:HGNC Symbol;Acc:HGNC:30551]	37127	-0.83887	-0.350651	Yes
VDAC1	voltage dependent anion channel 1 [Source:HGNC Symbol;Acc:HGNC:12669]	37373	-0.9111	-0.345982	Yes
MCM7	minichromosome maintenance complex component 7 [Source:HGNC Symbol;Acc:HGNC:6950]	37479	-0.939704	-0.337399	Yes
LDHA	lactate dehydrogenase A [Source:HGNC Symbol;Acc:HGNC:6535]	37673	-1.0122	-0.330192	Yes
PRDX4	peroxiredoxin 4 [Source:HGNC Symbol;Acc:HGNC:17169]	37796	-1.05721	-0.320635	Yes
TFDP1	transcription factor Dp-1 [Source:HGNC Symbol;Acc:HGNC:11749]	37903	-1.09956	-0.310162	Yes
KPNA2	karyopherin subunit alpha 2 [Source:HGNC Symbol;Acc:HGNC:6395]	38023	-1.15788	-0.299321	Yes
H2AZ1	H2A.Z variant histone 1 [Source:HGNC Symbol;Acc:HGNC:4741]	38125	-1.20615	-0.287444	Yes
RFC4	replication factor C subunit 4 [Source:HGNC Symbol;Acc:HGNC:9972]	38204	-1.24859	-0.274471	Yes
RRM1	ribonucleotide reductase catalytic subunit M1 [Source:HGNC Symbol;Acc:HGNC:10451]	38413	-1.38735	-0.263151	Yes
MCM6	minichromosome maintenance complex component 6 [Source:HGNC Symbol;Acc:HGNC:6949]	38516	-1.47997	-0.248017	Yes
CDK2	cyclin dependent kinase 2 [Source:HGNC Symbol;Acc:HGNC:1771]	38522	-1.48363	-0.230366	Yes
MCM2	minichromosome maintenance complex component 2 [Source:HGNC Symbol;Acc:HGNC:6944]	38609	-1.54558	-0.214038	Yes
PGK1	phosphoglycerate kinase 1 [Source:HGNC Symbol;Acc:HGNC:8896]	38674	-1.60498	-0.196437	Yes
MCM5	minichromosome maintenance complex component 5 [Source:HGNC Symbol;Acc:HGNC:6948]	38681	-1.60839	-0.177316	Yes
PCNA	proliferating cell nuclear antigen [Source:HGNC Symbol;Acc:HGNC:8729]	38751	-1.6867	-0.158863	Yes
MCM4	minichromosome maintenance complex component 4 [Source:HGNC Symbol;Acc:HGNC:6947]	38800	-1.75341	-0.139075	Yes
MYC	MYC proto-oncogene, bHLH transcription factor [Source:HGNC Symbol;Acc:HGNC:7553]	38902	-1.89498	-0.118943	Yes
CDC20	cell division cycle 20 [Source:HGNC Symbol;Acc:HGNC:1723]	38912	-1.90604	-0.0963316	Yes
TYMS	thymidylate synthetase [Source:HGNC Symbol;Acc:HGNC:12441]	39064	-2.10912	-0.0749083	Yes
MAD2L1	mitotic arrest deficient 2 like 1 [Source:HGNC Symbol;Acc:HGNC:6763]	39140	-2.22379	-0.0501725	Yes
CCNA2	cyclin A2 [Source:HGNC Symbol;Acc:HGNC:1578]	39147	-2.23476	-0.0235453	Yes
CDC45	cell division cycle 45 [Source:HGNC Symbol;Acc:HGNC:1739]	39262	-2.51393	0.00367266	Yes

## Sheet: TNFA
SYMBOL	TITLE	RANK IN GENE LIST	RANK METRIC SCORE	RUNNING ES	CORE ENRICHMENT
ACKR3	atypical chemokine receptor 3 [Source:HGNC Symbol;Acc:HGNC:23692]	36	3.33009	0.0171894	No
BTG2	BTG anti-proliferation factor 2 [Source:HGNC Symbol;Acc:HGNC:1131]	94	2.71923	0.0305217	No
KLF4	Kruppel like factor 4 [Source:HGNC Symbol;Acc:HGNC:6348]	140	2.5211	0.0430826	No
ID2	inhibitor of DNA binding 2 [Source:HGNC Symbol;Acc:HGNC:5361]	148	2.4895	0.0564409	No
FJX1	four-jointed box kinase 1 [Source:HGNC Symbol;Acc:HGNC:17166]	298	1.96498	0.0633253	No
TGIF1	TGFB induced factor homeobox 1 [Source:HGNC Symbol;Acc:HGNC:11776]	317	1.93312	0.0733777	No
BMP2	bone morphogenetic protein 2 [Source:HGNC Symbol;Acc:HGNC:1069]	340	1.89137	0.083101	No
BTG1	BTG anti-proliferation factor 1 [Source:HGNC Symbol;Acc:HGNC:1130]	551	1.60347	0.0864638	No
EGR2	early growth response 2 [Source:HGNC Symbol;Acc:HGNC:3239]	678	1.47867	0.0912905	No
GADD45A	growth arrest and DNA damage inducible alpha [Source:HGNC Symbol;Acc:HGNC:4095]	1046	1.24744	0.088713	No
SERPINB8	serpin family B member 8 [Source:HGNC Symbol;Acc:HGNC:8952]	1116	1.21485	0.093559	No
STAT5A	signal transducer and activator of transcription 5A [Source:HGNC Symbol;Acc:HGNC:11366]	1336	1.12291	0.0940792	No
ABCA1	ATP binding cassette subfamily A member 1 [Source:HGNC Symbol;Acc:HGNC:29]	1493	1.06382	0.0958849	No
DUSP5	dual specificity phosphatase 5 [Source:HGNC Symbol;Acc:HGNC:3071]	1624	1.01222	0.0980732	No
ETS2	ETS proto-oncogene 2, transcription factor [Source:HGNC Symbol;Acc:HGNC:3489]	1627	1.01176	0.103524	No
TSC22D1	TSC22 domain family member 1 [Source:HGNC Symbol;Acc:HGNC:16826]	1988	0.907997	0.0992789	No
DUSP2	dual specificity phosphatase 2 [Source:HGNC Symbol;Acc:HGNC:3068]	2361	0.861656	0.0944762	No
CD80	CD80 molecule [Source:HGNC Symbol;Acc:HGNC:1700]	3450	0.686607	0.0704595	No
PPP1R15A	protein phosphatase 1 regulatory subunit 15A [Source:HGNC Symbol;Acc:HGNC:14375]	3617	0.661834	0.0698243	No
CXCL11	C-X-C motif chemokine ligand 11 [Source:HGNC Symbol;Acc:HGNC:10638]	3861	0.63232	0.0670648	No
AREG	amphiregulin [Source:HGNC Symbol;Acc:HGNC:651]	4070	0.62982	0.0651843	No
TNFAIP3	TNF alpha induced protein 3 [Source:HGNC Symbol;Acc:HGNC:11896]	4376	0.597184	0.0606523	No
PNRC1	proline rich nuclear receptor coactivator 1 [Source:HGNC Symbol;Acc:HGNC:17278]	4499	0.582044	0.0607055	No
ATP2B1	ATPase plasma membrane Ca2+ transporting 1 [Source:HGNC Symbol;Acc:HGNC:814]	4512	0.579912	0.0635528	No
IL18	interleukin 18 [Source:HGNC Symbol;Acc:HGNC:5986]	4556	0.573485	0.0655744	No
CCL20	C-C motif chemokine ligand 20 [Source:HGNC Symbol;Acc:HGNC:10619]	4764	0.546749	0.0632677	No
IL23A	interleukin 23 subunit alpha [Source:HGNC Symbol;Acc:HGNC:15488]	4781	0.544912	0.0658226	No
TNFRSF9	TNF receptor superfamily member 9 [Source:HGNC Symbol;Acc:HGNC:11924]	5321	0.496677	0.0547758	No
TNC	tenascin C [Source:HGNC Symbol;Acc:HGNC:5318]	5624	0.471619	0.0496376	No
F2RL1	F2R like trypsin receptor 1 [Source:HGNC Symbol;Acc:HGNC:3538]	6085	0.446445	0.0403326	No
TNFSF9	TNF superfamily member 9 [Source:HGNC Symbol;Acc:HGNC:11939]	6207	0.446445	0.039674	No
IL12B	interleukin 12B [Source:HGNC Symbol;Acc:HGNC:5970]	6238	0.446445	0.0413364	No
CXCL6	C-X-C motif chemokine ligand 6 [Source:HGNC Symbol;Acc:HGNC:10643]	6425	0.433363	0.0389488	No
GCH1	GTP cyclohydrolase 1 [Source:HGNC Symbol;Acc:HGNC:4193]	7077	0.405012	0.0245469	No
NR4A2	nuclear receptor subfamily 4 group A member 2 [Source:HGNC Symbol;Acc:HGNC:7981]	7189	0.395071	0.023864	No
SQSTM1	sequestosome 1 [Source:HGNC Symbol;Acc:HGNC:11280]	7236	0.392316	0.024824	No
CCL5	C-C motif chemokine ligand 5 [Source:HGNC Symbol;Acc:HGNC:10632]	7925	0.355878	0.00921122	No
KDM6B	lysine demethylase 6B [Source:HGNC Symbol;Acc:HGNC:29012]	8495	0.308961	-0.00362149	No
JUN	Jun proto-oncogene, AP-1 transcription factor subunit [Source:HGNC Symbol;Acc:HGNC:6204]	8787	0.288463	-0.00947509	No
CCNL1	cyclin L1 [Source:HGNC Symbol;Acc:HGNC:20569]	10151	0.258258	-0.042835	No
PHLDA1	pleckstrin homology like domain family A member 1 [Source:HGNC Symbol;Acc:HGNC:8933]	10632	0.226624	-0.0538454	No
CFLAR	CASP8 and FADD like apoptosis regulator [Source:HGNC Symbol;Acc:HGNC:1876]	10669	0.22376	-0.0535469	No
LAMB3	laminin subunit beta 3 [Source:HGNC Symbol;Acc:HGNC:6490]	11103	0.195446	-0.0635281	No
G0S2	G0/G1 switch 2 [Source:HGNC Symbol;Acc:HGNC:30229]	11166	0.191043	-0.0640706	No
PLAUR	plasminogen activator, urokinase receptor [Source:HGNC Symbol;Acc:HGNC:9053]	11354	0.17842	-0.06787	No
SDC4	syndecan 4 [Source:HGNC Symbol;Acc:HGNC:10661]	11691	0.157395	-0.0755841	No
PLK2	polo like kinase 2 [Source:HGNC Symbol;Acc:HGNC:19699]	12024	0.138187	-0.0833005	No
PLAU	plasminogen activator, urokinase [Source:HGNC Symbol;Acc:HGNC:9052]	12912	0.0880329	-0.105445	No
TRAF1	TNF receptor associated factor 1 [Source:HGNC Symbol;Acc:HGNC:12031]	12996	0.0821895	-0.107115	No
GPR183	G protein-coupled receptor 183 [Source:HGNC Symbol;Acc:HGNC:3128]	13347	0.0616552	-0.115707	No
SOD2	superoxide dismutase 2 [Source:HGNC Symbol;Acc:HGNC:11180]	13361	0.0600845	-0.115712	No
PMEPA1	prostate transmembrane protein, androgen induced 1 [Source:HGNC Symbol;Acc:HGNC:14107]	13631	0.0472253	-0.122316	No
ZC3H12A	zinc finger CCCH-type containing 12A [Source:HGNC Symbol;Acc:HGNC:26259]	13734	0.040001	-0.1247	No
ZBTB10	zinc finger and BTB domain containing 10 [Source:HGNC Symbol;Acc:HGNC:30953]	13759	0.0386604	-0.125102	No
DNAJB4	DnaJ heat shock protein family (Hsp40) member B4 [Source:HGNC Symbol;Acc:HGNC:14886]	13819	0.034756	-0.126418	No
TUBB2A	tubulin beta 2A class IIa [Source:HGNC Symbol;Acc:HGNC:12412]	14323	0.00490985	-0.139221	No
SIK1	salt inducible kinase 1 [Source:HGNC Symbol;Acc:HGNC:11142]	15500	0	-0.169215	No
CCRL2	C-C motif chemokine receptor like 2 [Source:HGNC Symbol;Acc:HGNC:1612]	15709	0	-0.174521	No
ICOSLG	inducible T cell costimulator ligand [Source:HGNC Symbol;Acc:HGNC:17087]	16790	0	-0.202067	No
TNF	tumor necrosis factor [Source:HGNC Symbol;Acc:HGNC:11892]	17195	0	-0.212371	No
TLR2	toll like receptor 2 [Source:HGNC Symbol;Acc:HGNC:11848]	18142	0	-0.236499	No
OLR1	oxidized low density lipoprotein receptor 1 [Source:HGNC Symbol;Acc:HGNC:8133]	19006	0	-0.258511	No
FUT4	fucosyltransferase 4 [Source:HGNC Symbol;Acc:HGNC:4015]	19593	0	-0.273457	No
SERPINB2	serpin family B member 2 [Source:HGNC Symbol;Acc:HGNC:8584]	19652	0	-0.274936	No
MSC	musculin [Source:HGNC Symbol;Acc:HGNC:7321]	20444	0	-0.295111	No
CXCL1	C-X-C motif chemokine ligand 1 [Source:HGNC Symbol;Acc:HGNC:4602]	20677	0	-0.301029	No
CSF2	colony stimulating factor 2 [Source:HGNC Symbol;Acc:HGNC:2434]	24407	0	-0.396139	No
BIRC2	baculoviral IAP repeat containing 2 [Source:HGNC Symbol;Acc:HGNC:590]	26958	-0.0137388	-0.461104	No
NFE2L2	nuclear factor, erythroid 2 like 2 [Source:HGNC Symbol;Acc:HGNC:7782]	27129	-0.0230522	-0.465314	No
NFKB1	nuclear factor kappa B subunit 1 [Source:HGNC Symbol;Acc:HGNC:7794]	28117	-0.0742225	-0.490085	No
NFKBIE	NFKB inhibitor epsilon [Source:HGNC Symbol;Acc:HGNC:7799]	28253	-0.0822527	-0.493081	No
SERPINE1	serpin family E member 1 [Source:HGNC Symbol;Acc:HGNC:8583]	28279	-0.0836122	-0.493264	No
CLCF1	cardiotrophin like cytokine factor 1 [Source:HGNC Symbol;Acc:HGNC:17412]	28286	-0.0837685	-0.492961	No
SLC16A6	solute carrier family 16 member 6 [Source:HGNC Symbol;Acc:HGNC:10927]	28362	-0.0881817	-0.494395	No
FOSL2	FOS like 2, AP-1 transcription factor subunit [Source:HGNC Symbol;Acc:HGNC:3798]	28709	-0.106663	-0.50264	No
DDX58	DExD/H-box helicase 58 [Source:HGNC Symbol;Acc:HGNC:19102]	29214	-0.135508	-0.514758	No
PANX1	pannexin 1 [Source:HGNC Symbol;Acc:HGNC:8599]	29302	-0.141758	-0.516206	No
INHBA	inhibin subunit beta A [Source:HGNC Symbol;Acc:HGNC:6066]	29550	-0.156521	-0.521655	No
SNN	stannin [Source:HGNC Symbol;Acc:HGNC:11149]	30385	-0.204702	-0.541813	No
BCL2A1	BCL2 related protein A1 [Source:HGNC Symbol;Acc:HGNC:991]	31055	-0.248725	-0.557524	No
MXD1	MAX dimerization protein 1 [Source:HGNC Symbol;Acc:HGNC:6761]	31265	-0.254886	-0.561469	No
YRDC	yrdC N6-threonylcarbamoyltransferase domain containing [Source:HGNC Symbol;Acc:HGNC:28905]	31459	-0.266773	-0.564941	No
RELB	RELB proto-oncogene, NF-kB subunit [Source:HGNC Symbol;Acc:HGNC:9956]	31485	-0.268912	-0.564116	No
EIF1	eukaryotic translation initiation factor 1 [Source:HGNC Symbol;Acc:HGNC:3249]	31531	-0.271309	-0.563789	No
BCL3	BCL3 transcription coactivator [Source:HGNC Symbol;Acc:HGNC:998]	31627	-0.278321	-0.564698	No
PTX3	pentraxin 3 [Source:HGNC Symbol;Acc:HGNC:9692]	31817	-0.29579	-0.567911	No
REL	REL proto-oncogene, NF-kB subunit [Source:HGNC Symbol;Acc:HGNC:9954]	31859	-0.299543	-0.567328	No
GFPT2	glutamine-fructose-6-phosphate transaminase 2 [Source:HGNC Symbol;Acc:HGNC:4242]	31893	-0.30137	-0.566531	No
CD44	CD44 molecule (Indian blood group) [Source:HGNC Symbol;Acc:HGNC:1681]	32183	-0.324393	-0.572138	No
CDKN1A	cyclin dependent kinase inhibitor 1A [Source:HGNC Symbol;Acc:HGNC:1784]	32201	-0.326135	-0.570798	No
B4GALT1	beta-1,4-galactosyltransferase 1 [Source:HGNC Symbol;Acc:HGNC:924]	32364	-0.339309	-0.573085	No
SPSB1	splA/ryanodine receptor domain and SOCS box containing 1 [Source:HGNC Symbol;Acc:HGNC:30628]	32636	-0.35628	-0.57806	No
RELA	RELA proto-oncogene, NF-kB subunit [Source:HGNC Symbol;Acc:HGNC:9955]	32739	-0.365118	-0.578676	No
DUSP4	dual specificity phosphatase 4 [Source:HGNC Symbol;Acc:HGNC:3070]	33327	-0.410724	-0.591414	No
KYNU	kynureninase [Source:HGNC Symbol;Acc:HGNC:6469]	33494	-0.412375	-0.593406	No
CCL4	C-C motif chemokine ligand 4 [Source:HGNC Symbol;Acc:HGNC:10630]	33505	-0.412375	-0.591419	No
MCL1	MCL1 apoptosis regulator, BCL2 family member [Source:HGNC Symbol;Acc:HGNC:6943]	33727	-0.416682	-0.59479	No
EHD1	EH domain containing 1 [Source:HGNC Symbol;Acc:HGNC:3242]	33810	-0.423639	-0.594578	No
TNIP2	TNFAIP3 interacting protein 2 [Source:HGNC Symbol;Acc:HGNC:19118]	33922	-0.434016	-0.595049	No
RNF19B	ring finger protein 19B [Source:HGNC Symbol;Acc:HGNC:26886]	34082	-0.451588	-0.596649	No
IL15RA	interleukin 15 receptor subunit alpha [Source:HGNC Symbol;Acc:HGNC:5978]	34522	-0.468534	-0.605298	No
PLEK	pleckstrin [Source:HGNC Symbol;Acc:HGNC:9070]	34691	-0.481113	-0.606967	No
PTGS2	prostaglandin-endoperoxide synthase 2 [Source:HGNC Symbol;Acc:HGNC:9605]	34865	-0.484889	-0.608743	No
NAMPT	nicotinamide phosphoribosyltransferase [Source:HGNC Symbol;Acc:HGNC:30092]	35061	-0.499377	-0.611001	Yes
FOSB	FosB proto-oncogene, AP-1 transcription factor subunit [Source:HGNC Symbol;Acc:HGNC:3797]	35080	-0.5018	-0.608731	Yes
ICAM1	intercellular adhesion molecule 1 [Source:HGNC Symbol;Acc:HGNC:5344]	35251	-0.516908	-0.610256	Yes
BCL6	BCL6 transcription repressor [Source:HGNC Symbol;Acc:HGNC:1001]	35263	-0.518055	-0.60772	Yes
EGR1	early growth response 1 [Source:HGNC Symbol;Acc:HGNC:3238]	35494	-0.54387	-0.610629	Yes
TAP1	transporter 1, ATP binding cassette subfamily B member [Source:HGNC Symbol;Acc:HGNC:43]	35543	-0.551039	-0.608857	Yes
IL1A	interleukin 1 alpha [Source:HGNC Symbol;Acc:HGNC:5991]	35573	-0.554839	-0.60658	Yes
NFIL3	nuclear factor, interleukin 3 regulated [Source:HGNC Symbol;Acc:HGNC:7787]	35609	-0.559184	-0.604432	Yes
PLPP3	phospholipid phosphatase 3 [Source:HGNC Symbol;Acc:HGNC:9229]	35669	-0.568131	-0.602847	Yes
TANK	TRAF family member associated NFKB activator [Source:HGNC Symbol;Acc:HGNC:11562]	35685	-0.570331	-0.600129	Yes
PDLIM5	PDZ and LIM domain 5 [Source:HGNC Symbol;Acc:HGNC:17468]	35763	-0.581856	-0.598929	Yes
IFIH1	interferon induced with helicase C domain 1 [Source:HGNC Symbol;Acc:HGNC:18873]	35834	-0.594773	-0.59748	Yes
TIPARP	TCDD inducible poly(ADP-ribose) polymerase [Source:HGNC Symbol;Acc:HGNC:23696]	35839	-0.595809	-0.594342	Yes
IRS2	insulin receptor substrate 2 [Source:HGNC Symbol;Acc:HGNC:6126]	35960	-0.61727	-0.594047	Yes
CD69	CD69 molecule [Source:HGNC Symbol;Acc:HGNC:1694]	35989	-0.623063	-0.591373	Yes
DRAM1	DNA damage regulated autophagy modulator 1 [Source:HGNC Symbol;Acc:HGNC:25645]	36064	-0.633199	-0.589817	Yes
DUSP1	dual specificity phosphatase 1 [Source:HGNC Symbol;Acc:HGNC:3064]	36091	-0.637359	-0.587014	Yes
MAP3K8	mitogen-activated protein kinase kinase kinase 8 [Source:HGNC Symbol;Acc:HGNC:6860]	36244	-0.665192	-0.587274	Yes
PTPRE	protein tyrosine phosphatase receptor type E [Source:HGNC Symbol;Acc:HGNC:9669]	36320	-0.680379	-0.585488	Yes
SMAD3	SMAD family member 3 [Source:HGNC Symbol;Acc:HGNC:6769]	36466	-0.705	-0.585353	Yes
DENND5A	DENN domain containing 5A [Source:HGNC Symbol;Acc:HGNC:19344]	36639	-0.736202	-0.585736	Yes
FOSL1	FOS like 1, AP-1 transcription factor subunit [Source:HGNC Symbol;Acc:HGNC:13718]	36647	-0.737916	-0.581902	Yes
NR4A3	nuclear receptor subfamily 4 group A member 3 [Source:HGNC Symbol;Acc:HGNC:7982]	36669	-0.741829	-0.578404	Yes
NFKB2	nuclear factor kappa B subunit 2 [Source:HGNC Symbol;Acc:HGNC:7795]	36843	-0.784457	-0.578551	Yes
CEBPB	CCAAT enhancer binding protein beta [Source:HGNC Symbol;Acc:HGNC:1834]	36844	-0.784566	-0.574285	Yes
KLF6	Kruppel like factor 6 [Source:HGNC Symbol;Acc:HGNC:2235]	36932	-0.805178	-0.572126	Yes
IL6	interleukin 6 [Source:HGNC Symbol;Acc:HGNC:6018]	36985	-0.812678	-0.569033	Yes
MAP2K3	mitogen-activated protein kinase kinase 3 [Source:HGNC Symbol;Acc:HGNC:6843]	37128	-0.839615	-0.568089	Yes
MARCKS	myristoylated alanine rich protein kinase C substrate [Source:HGNC Symbol;Acc:HGNC:6759]	37189	-0.857242	-0.564958	Yes
JAG1	jagged canonical Notch ligand 1 [Source:HGNC Symbol;Acc:HGNC:6188]	37191	-0.858154	-0.560318	Yes
IL6ST	interleukin 6 signal transducer [Source:HGNC Symbol;Acc:HGNC:6021]	37224	-0.865201	-0.556429	Yes
FOS	Fos proto-oncogene, AP-1 transcription factor subunit [Source:HGNC Symbol;Acc:HGNC:3796]	37304	-0.887981	-0.553616	Yes
IER3	immediate early response 3 [Source:HGNC Symbol;Acc:HGNC:5392]	37310	-0.889489	-0.548906	Yes
IFNGR2	interferon gamma receptor 2 [Source:HGNC Symbol;Acc:HGNC:5440]	37331	-0.896153	-0.544544	Yes
NFAT5	nuclear factor of activated T cells 5 [Source:HGNC Symbol;Acc:HGNC:7774]	37416	-0.926367	-0.541649	Yes
PER1	period circadian regulator 1 [Source:HGNC Symbol;Acc:HGNC:8845]	37424	-0.930211	-0.536769	Yes
PFKFB3	6-phosphofructo-2-kinase/fructose-2,6-biphosphatase 3 [Source:HGNC Symbol;Acc:HGNC:8874]	37428	-0.931991	-0.531778	Yes
CXCL10	C-X-C motif chemokine ligand 10 [Source:HGNC Symbol;Acc:HGNC:10637]	37430	-0.93292	-0.526731	Yes
PDE4B	phosphodiesterase 4B [Source:HGNC Symbol;Acc:HGNC:8781]	37473	-0.938995	-0.522696	Yes
MAFF	MAF bZIP transcription factor F [Source:HGNC Symbol;Acc:HGNC:6780]	37500	-0.945375	-0.518219	Yes
KLF2	Kruppel like factor 2 [Source:HGNC Symbol;Acc:HGNC:6347]	37508	-0.94726	-0.513247	Yes
BTG3	BTG anti-proliferation factor 3 [Source:HGNC Symbol;Acc:HGNC:1132]	37657	-1.00241	-0.511571	Yes
LITAF	lipopolysaccharide induced TNF factor [Source:HGNC Symbol;Acc:HGNC:16841]	37672	-1.01107	-0.50643	Yes
GEM	GTP binding protein overexpressed in skeletal muscle [Source:HGNC Symbol;Acc:HGNC:4234]	37745	-1.03748	-0.502625	Yes
ATF3	activating transcription factor 3 [Source:HGNC Symbol;Acc:HGNC:785]	37892	-1.09632	-0.500387	Yes
PTGER4	prostaglandin E receptor 4 [Source:HGNC Symbol;Acc:HGNC:9596]	37909	-1.10303	-0.494798	Yes
SLC2A6	solute carrier family 2 member 6 [Source:HGNC Symbol;Acc:HGNC:11011]	37959	-1.12364	-0.489938	Yes
EDN1	endothelin 1 [Source:HGNC Symbol;Acc:HGNC:3176]	37960	-1.12404	-0.483826	Yes
TNIP1	TNFAIP3 interacting protein 1 [Source:HGNC Symbol;Acc:HGNC:16903]	38047	-1.16748	-0.479671	Yes
CSF1	colony stimulating factor 1 [Source:HGNC Symbol;Acc:HGNC:2432]	38062	-1.17694	-0.473628	Yes
NINJ1	ninjurin 1 [Source:HGNC Symbol;Acc:HGNC:7824]	38088	-1.18614	-0.467816	Yes
CCN1	cellular communication network factor 1 [Source:HGNC Symbol;Acc:HGNC:2654]	38212	-1.25291	-0.46414	Yes
SGK1	serum/glucocorticoid regulated kinase 1 [Source:HGNC Symbol;Acc:HGNC:10810]	38236	-1.26544	-0.457846	Yes
EGR3	early growth response 3 [Source:HGNC Symbol;Acc:HGNC:3240]	38246	-1.27753	-0.451129	Yes
PHLDA2	pleckstrin homology like domain family A member 2 [Source:HGNC Symbol;Acc:HGNC:12385]	38297	-1.30523	-0.445307	Yes
EFNA1	ephrin A1 [Source:HGNC Symbol;Acc:HGNC:3221]	38298	-1.30532	-0.438209	Yes
BIRC3	baculoviral IAP repeat containing 3 [Source:HGNC Symbol;Acc:HGNC:591]	38339	-1.3367	-0.431961	Yes
TRIP10	thyroid hormone receptor interactor 10 [Source:HGNC Symbol;Acc:HGNC:12304]	38415	-1.38783	-0.426328	Yes
GADD45B	growth arrest and DNA damage inducible beta [Source:HGNC Symbol;Acc:HGNC:4096]	38473	-1.44515	-0.419923	Yes
CCND1	cyclin D1 [Source:HGNC Symbol;Acc:HGNC:1582]	38482	-1.45099	-0.412237	Yes
IRF1	interferon regulatory factor 1 [Source:HGNC Symbol;Acc:HGNC:6116]	38495	-1.46202	-0.404594	Yes
CEBPD	CCAAT enhancer binding protein delta [Source:HGNC Symbol;Acc:HGNC:1835]	38529	-1.4864	-0.397353	Yes
B4GALT5	beta-1,4-galactosyltransferase 5 [Source:HGNC Symbol;Acc:HGNC:928]	38570	-1.51903	-0.390113	Yes
RIPK2	receptor interacting serine/threonine kinase 2 [Source:HGNC Symbol;Acc:HGNC:10020]	38572	-1.51955	-0.381876	Yes
TNFAIP6	TNF alpha induced protein 6 [Source:HGNC Symbol;Acc:HGNC:11898]	38591	-1.53456	-0.373991	Yes
NFKBIA	NFKB inhibitor alpha [Source:HGNC Symbol;Acc:HGNC:7797]	38653	-1.58344	-0.366937	Yes
IER2	immediate early response 2 [Source:HGNC Symbol;Acc:HGNC:28871]	38682	-1.61106	-0.35889	Yes
NR4A1	nuclear receptor subfamily 4 group A member 1 [Source:HGNC Symbol;Acc:HGNC:7980]	38688	-1.61472	-0.350238	Yes
ZFP36	ZFP36 ring finger protein [Source:HGNC Symbol;Acc:HGNC:12862]	38704	-1.62917	-0.341762	Yes
TNFAIP2	TNF alpha induced protein 2 [Source:HGNC Symbol;Acc:HGNC:11895]	38707	-1.63316	-0.332932	Yes
KLF9	Kruppel like factor 9 [Source:HGNC Symbol;Acc:HGNC:1123]	38723	-1.65417	-0.32432	Yes
IL1B	interleukin 1 beta [Source:HGNC Symbol;Acc:HGNC:5992]	38735	-1.67128	-0.315513	Yes
JUNB	JunB proto-oncogene, AP-1 transcription factor subunit [Source:HGNC Symbol;Acc:HGNC:6205]	38764	-1.70407	-0.306961	Yes
VEGFA	vascular endothelial growth factor A [Source:HGNC Symbol;Acc:HGNC:12680]	38776	-1.7224	-0.297876	Yes
IER5	immediate early response 5 [Source:HGNC Symbol;Acc:HGNC:5393]	38799	-1.75306	-0.288905	Yes
MYC	MYC proto-oncogene, bHLH transcription factor [Source:HGNC Symbol;Acc:HGNC:7553]	38902	-1.89498	-0.281202	Yes
LDLR	low density lipoprotein receptor [Source:HGNC Symbol;Acc:HGNC:6547]	38919	-1.9142	-0.271202	Yes
SPHK1	sphingosine kinase 1 [Source:HGNC Symbol;Acc:HGNC:11240]	38926	-1.92032	-0.260913	Yes
BHLHE40	basic helix-loop-helix family member e40 [Source:HGNC Symbol;Acc:HGNC:1046]	38929	-1.92128	-0.250517	Yes
RCAN1	regulator of calcineurin 1 [Source:HGNC Symbol;Acc:HGNC:3040]	38932	-1.92282	-0.240112	Yes
SLC2A3	solute carrier family 2 member 3 [Source:HGNC Symbol;Acc:HGNC:11007]	38980	-1.97157	-0.23059	Yes
CD83	CD83 molecule [Source:HGNC Symbol;Acc:HGNC:1703]	39026	-2.04051	-0.220643	Yes
KLF10	Kruppel like factor 10 [Source:HGNC Symbol;Acc:HGNC:11810]	39057	-2.10079	-0.209985	Yes
IFIT2	interferon induced protein with tetratricopeptide repeats 2 [Source:HGNC Symbol;Acc:HGNC:5409]	39060	-2.1038	-0.198596	Yes
IL7R	interleukin 7 receptor [Source:HGNC Symbol;Acc:HGNC:6024]	39127	-2.20711	-0.188278	Yes
RHOB	ras homolog family member B [Source:HGNC Symbol;Acc:HGNC:668]	39130	-2.21116	-0.176306	Yes
HBEGF	heparin binding EGF like growth factor [Source:HGNC Symbol;Acc:HGNC:3059]	39167	-2.27277	-0.164866	Yes
SOCS3	suppressor of cytokine signaling 3 [Source:HGNC Symbol;Acc:HGNC:19391]	39198	-2.34863	-0.15286	Yes
LIF	LIF interleukin 6 family cytokine [Source:HGNC Symbol;Acc:HGNC:6596]	39226	-2.4038	-0.140478	Yes
TNFAIP8	TNF alpha induced protein 8 [Source:HGNC Symbol;Acc:HGNC:17260]	39256	-2.49333	-0.12766	Yes
CXCL2	C-X-C motif chemokine ligand 2 [Source:HGNC Symbol;Acc:HGNC:4603]	39346	-2.93206	-0.113986	Yes
SAT1	spermidine/spermine N1-acetyltransferase 1 [Source:HGNC Symbol;Acc:HGNC:10540]	39347	-2.94479	-0.0979738	Yes
CXCL3	C-X-C motif chemokine ligand 3 [Source:HGNC Symbol;Acc:HGNC:4604]	39351	-3.00368	-0.0817175	Yes
TRIB1	tribbles pseudokinase 1 [Source:HGNC Symbol;Acc:HGNC:16891]	39390	-3.68625	-0.0626425	Yes
F3	coagulation factor III, tissue factor [Source:HGNC Symbol;Acc:HGNC:3541]	39391	-3.68695	-0.0425944	Yes
HES1	hes family bHLH transcription factor 1 [Source:HGNC Symbol;Acc:HGNC:5192]	39396	-3.7508	-0.0223011	Yes
CCL2	C-C motif chemokine ligand 2 [Source:HGNC Symbol;Acc:HGNC:10618]	39401	-4.14353	0.000127659	Yes

## Sheet: Mitotic_Spindle
SYMBOL	TITLE	RANK IN GENE LIST	RANK METRIC SCORE	RUNNING ES	CORE ENRICHMENT
BCL2L11	BCL2 like 11 [Source:HGNC Symbol;Acc:HGNC:994]	74	2.80983	0.0161469	No
SHROOM2	shroom family member 2 [Source:HGNC Symbol;Acc:HGNC:630]	112	2.60448	0.0319194	No
ARHGEF2	Rho/Rac guanine nucleotide exchange factor 2 [Source:HGNC Symbol;Acc:HGNC:682]	229	2.13854	0.0426865	No
TLK1	tousled like kinase 1 [Source:HGNC Symbol;Acc:HGNC:11841]	348	1.87579	0.0517162	No
FGD4	FYVE, RhoGEF and PH domain containing 4 [Source:HGNC Symbol;Acc:HGNC:19125]	684	1.47391	0.052632	No
ARHGEF3	Rho guanine nucleotide exchange factor 3 [Source:HGNC Symbol;Acc:HGNC:683]	972	1.29003	0.0535918	No
DOCK4	dedicator of cytokinesis 4 [Source:HGNC Symbol;Acc:HGNC:19192]	1125	1.20791	0.0574677	No
ARHGAP4	Rho GTPase activating protein 4 [Source:HGNC Symbol;Acc:HGNC:674]	1444	1.07985	0.0562878	No
GSN	gelsolin [Source:HGNC Symbol;Acc:HGNC:4620]	1483	1.06711	0.0621677	No
CYTH2	cytohesin 2 [Source:HGNC Symbol;Acc:HGNC:9502]	1564	1.03118	0.0667456	No
NEDD9	neural precursor cell expressed, developmentally down-regulated 9 [Source:HGNC Symbol;Acc:HGNC:7733]	1711	0.983581	0.0693348	No
ARHGAP27	Rho GTPase activating protein 27 [Source:HGNC Symbol;Acc:HGNC:31813]	1751	0.97189	0.0745779	No
CDC42EP2	CDC42 effector protein 2 [Source:HGNC Symbol;Acc:HGNC:16263]	2311	0.865749	0.0658772	No
RHOF	ras homolog family member F, filopodia associated [Source:HGNC Symbol;Acc:HGNC:15703]	2872	0.784438	0.0566291	No
TRIO	trio Rho guanine nucleotide exchange factor [Source:HGNC Symbol;Acc:HGNC:12303]	3044	0.750111	0.0570822	No
RASA1	RAS p21 protein activator 1 [Source:HGNC Symbol;Acc:HGNC:9871]	3199	0.72665	0.0578182	No
ALMS1	ALMS1 centrosome and basal body associated protein [Source:HGNC Symbol;Acc:HGNC:428]	3777	0.640808	0.0472147	No
KLC1	kinesin light chain 1 [Source:HGNC Symbol;Acc:HGNC:6387]	3837	0.633564	0.0497763	No
NCK2	NCK adaptor protein 2 [Source:HGNC Symbol;Acc:HGNC:7665]	4325	0.601858	0.0412182	No
SOS1	SOS Ras/Rac guanine nucleotide exchange factor 1 [Source:HGNC Symbol;Acc:HGNC:11187]	4506	0.580927	0.0403559	No
KPTN	kaptin, actin binding protein [Source:HGNC Symbol;Acc:HGNC:6404]	4792	0.543926	0.036578	No
ARHGEF11	Rho guanine nucleotide exchange factor 11 [Source:HGNC Symbol;Acc:HGNC:14580]	4967	0.526128	0.035517	No
ARAP3	ArfGAP with RhoGAP domain, ankyrin repeat and PH domain 3 [Source:HGNC Symbol;Acc:HGNC:24097]	5510	0.482994	0.0247932	No
PREX1	phosphatidylinositol-3,4,5-trisphosphate dependent Rac exchange factor 1 [Source:HGNC Symbol;Acc:HGNC:32594]	5928	0.447577	0.0170303	No
HDAC6	histone deacetylase 6 [Source:HGNC Symbol;Acc:HGNC:14064]	6336	0.436695	0.00945258	No
RASA2	RAS p21 protein activator 2 [Source:HGNC Symbol;Acc:HGNC:9872]	6835	0.42686	-0.000509208	No
RHOT2	ras homolog family member T2 [Source:HGNC Symbol;Acc:HGNC:21169]	6905	0.420308	0.000428587	No
CEP57	centrosomal protein 57 [Source:HGNC Symbol;Acc:HGNC:30794]	7165	0.396958	-0.00362943	No
TUBGCP6	tubulin gamma complex associated protein 6 [Source:HGNC Symbol;Acc:HGNC:18127]	7233	0.392713	-0.00281773	No
SPTAN1	spectrin alpha, non-erythrocytic 1 [Source:HGNC Symbol;Acc:HGNC:11273]	8024	0.346058	-0.0207456	No
ABI1	abl interactor 1 [Source:HGNC Symbol;Acc:HGNC:11320]	8044	0.344839	-0.0190169	No
APC	APC regulator of WNT signaling pathway [Source:HGNC Symbol;Acc:HGNC:583]	8307	0.323166	-0.0236251	No
DYNLL2	dynein light chain LC8-type 2 [Source:HGNC Symbol;Acc:HGNC:24596]	8403	0.316343	-0.0240177	No
CNTRL	centriolin [Source:HGNC Symbol;Acc:HGNC:1858]	8680	0.296205	-0.0291559	No
NF1	neurofibromin 1 [Source:HGNC Symbol;Acc:HGNC:7765]	8698	0.295169	-0.0276951	No
TSC1	TSC complex subunit 1 [Source:HGNC Symbol;Acc:HGNC:12362]	8746	0.291493	-0.0270229	No
ROCK1	Rho associated coiled-coil containing protein kinase 1 [Source:HGNC Symbol;Acc:HGNC:10251]	9754	0.28656	-0.0508672	No
NIN	ninein [Source:HGNC Symbol;Acc:HGNC:14906]	9802	0.282896	-0.0502503	No
FGD6	FYVE, RhoGEF and PH domain containing 6 [Source:HGNC Symbol;Acc:HGNC:21740]	9930	0.274943	-0.0517248	No
PCM1	pericentriolar material 1 [Source:HGNC Symbol;Acc:HGNC:8727]	10278	0.249653	-0.0589727	No
CTTN	cortactin [Source:HGNC Symbol;Acc:HGNC:3338]	10995	0.201233	-0.0759427	No
RAPGEF6	Rap guanine nucleotide exchange factor 6 [Source:HGNC Symbol;Acc:HGNC:20655]	11138	0.192945	-0.078326	No
ARHGEF7	Rho guanine nucleotide exchange factor 7 [Source:HGNC Symbol;Acc:HGNC:15607]	11162	0.191296	-0.0776848	No
CLASP1	cytoplasmic linker associated protein 1 [Source:HGNC Symbol;Acc:HGNC:17088]	11213	0.187645	-0.0777557	No
ARFGEF1	ADP ribosylation factor guanine nucleotide exchange factor 1 [Source:HGNC Symbol;Acc:HGNC:15772]	11225	0.186704	-0.076838	No
CDC42BPA	CDC42 binding protein kinase alpha [Source:HGNC Symbol;Acc:HGNC:1737]	11861	0.1483	-0.0920818	No
NUMA1	nuclear mitotic apparatus protein 1 [Source:HGNC Symbol;Acc:HGNC:8059]	11970	0.140773	-0.0939328	No
DYNC1H1	dynein cytoplasmic 1 heavy chain 1 [Source:HGNC Symbol;Acc:HGNC:2961]	11987	0.139944	-0.0934427	No
TBCD	tubulin folding cofactor D [Source:HGNC Symbol;Acc:HGNC:11581]	12048	0.136631	-0.0940961	No
NOTCH2	notch receptor 2 [Source:HGNC Symbol;Acc:HGNC:7882]	12261	0.124106	-0.0987066	No
ARHGEF12	Rho guanine nucleotide exchange factor 12 [Source:HGNC Symbol;Acc:HGNC:14193]	12329	0.120157	-0.0996443	No
SHROOM1	shroom family member 1 [Source:HGNC Symbol;Acc:HGNC:24084]	12361	0.11803	-0.0996774	No
LRPPRC	leucine rich pentatricopeptide repeat containing [Source:HGNC Symbol;Acc:HGNC:15714]	12685	0.0989035	-0.107281	No
TAOK2	TAO kinase 2 [Source:HGNC Symbol;Acc:HGNC:16835]	12793	0.0931952	-0.109412	No
WASF1	WASP family member 1 [Source:HGNC Symbol;Acc:HGNC:12732]	12947	0.0856742	-0.112764	No
HOOK3	hook microtubule tethering protein 3 [Source:HGNC Symbol;Acc:HGNC:23576]	13028	0.0800141	-0.114291	No
LATS1	large tumor suppressor kinase 1 [Source:HGNC Symbol;Acc:HGNC:6514]	13435	0.0557976	-0.124288	No
VCL	vinculin [Source:HGNC Symbol;Acc:HGNC:12665]	13609	0.0493941	-0.128383	No
TUBGCP2	tubulin gamma complex associated protein 2 [Source:HGNC Symbol;Acc:HGNC:18599]	13726	0.0405666	-0.131081	No
MYO9B	myosin IXB [Source:HGNC Symbol;Acc:HGNC:7609]	13740	0.0396083	-0.131159	No
ATG4B	autophagy related 4B cysteine peptidase [Source:HGNC Symbol;Acc:HGNC:20790]	13769	0.0381744	-0.131628	No
BCR	BCR activator of RhoGEF and GTPase [Source:HGNC Symbol;Acc:HGNC:1014]	13784	0.0370404	-0.131747	No
TUBGCP5	tubulin gamma complex associated protein 5 [Source:HGNC Symbol;Acc:HGNC:18600]	13836	0.0331129	-0.132835	No
PCNT	pericentrin [Source:HGNC Symbol;Acc:HGNC:16068]	13957	0.026595	-0.135725	No
RAB3GAP1	RAB3 GTPase activating protein catalytic subunit 1 [Source:HGNC Symbol;Acc:HGNC:17063]	14177	0.0145806	-0.141217	No
CCDC88A	coiled-coil domain containing 88A [Source:HGNC Symbol;Acc:HGNC:25523]	14258	0.00922292	-0.143198	No
KATNA1	katanin catalytic subunit A1 [Source:HGNC Symbol;Acc:HGNC:6216]	14368	0.00262028	-0.145962	No
BIN1	bridging integrator 1 [Source:HGNC Symbol;Acc:HGNC:1052]	14374	0.00205781	-0.146076	No
ARFIP2	ADP ribosylation factor interacting protein 2 [Source:HGNC Symbol;Acc:HGNC:17160]	26735	-0.000524316	-0.461314	No
KIF5B	kinesin family member 5B [Source:HGNC Symbol;Acc:HGNC:6324]	26787	-0.00445011	-0.462587	No
KIF3C	kinesin family member 3C [Source:HGNC Symbol;Acc:HGNC:6321]	26981	-0.0150636	-0.467412	No
STK38L	serine/threonine kinase 38 like [Source:HGNC Symbol;Acc:HGNC:17848]	27229	-0.0277188	-0.473534	No
SSH2	slingshot protein phosphatase 2 [Source:HGNC Symbol;Acc:HGNC:30580]	27663	-0.0533551	-0.484235	No
ALS2	alsin Rho guanine nucleotide exchange factor ALS2 [Source:HGNC Symbol;Acc:HGNC:443]	27852	-0.0616268	-0.488635	No
RICTOR	RPTOR independent companion of MTOR complex 2 [Source:HGNC Symbol;Acc:HGNC:28611]	28104	-0.0736769	-0.494564	No
KATNB1	katanin regulatory subunit B1 [Source:HGNC Symbol;Acc:HGNC:6217]	28296	-0.0840248	-0.498896	No
DST	dystonin [Source:HGNC Symbol;Acc:HGNC:1090]	28307	-0.0847538	-0.498607	No
BCAR1	BCAR1 scaffold protein, Cas family member [Source:HGNC Symbol;Acc:HGNC:971]	28497	-0.0931934	-0.502829	No
MYH10	myosin heavy chain 10 [Source:HGNC Symbol;Acc:HGNC:7568]	28534	-0.0954424	-0.503135	No
KIF3B	kinesin family member 3B [Source:HGNC Symbol;Acc:HGNC:6320]	28538	-0.0956025	-0.502598	No
TUBGCP3	tubulin gamma complex associated protein 3 [Source:HGNC Symbol;Acc:HGNC:18598]	28605	-0.0993776	-0.503643	No
MAP3K11	mitogen-activated protein kinase kinase kinase 11 [Source:HGNC Symbol;Acc:HGNC:6850]	28610	-0.0997059	-0.503105	No
TUBD1	tubulin delta 1 [Source:HGNC Symbol;Acc:HGNC:16811]	28927	-0.118713	-0.510403	No
UXT	ubiquitously expressed prefoldin like chaperone [Source:HGNC Symbol;Acc:HGNC:12641]	28968	-0.121177	-0.510645	No
PAFAH1B1	platelet activating factor acetylhydrolase 1b regulatory subunit 1 [Source:HGNC Symbol;Acc:HGNC:8574]	29180	-0.133139	-0.515173	No
RANBP9	RAN binding protein 9 [Source:HGNC Symbol;Acc:HGNC:13727]	29201	-0.134262	-0.514821	No
PKD2	polycystin 2, transient receptor potential cation channel [Source:HGNC Symbol;Acc:HGNC:9009]	29254	-0.138062	-0.515261	No
MARK4	microtubule affinity regulating kinase 4 [Source:HGNC Symbol;Acc:HGNC:13538]	29400	-0.147676	-0.518011	No
MAP1S	microtubule associated protein 1S [Source:HGNC Symbol;Acc:HGNC:15715]	29401	-0.14779	-0.517063	No
CEP250	centrosomal protein 250 [Source:HGNC Symbol;Acc:HGNC:1859]	29425	-0.149343	-0.516691	No
MID1	midline 1 [Source:HGNC Symbol;Acc:HGNC:7095]	29499	-0.154472	-0.517561	No
KIFAP3	kinesin associated protein 3 [Source:HGNC Symbol;Acc:HGNC:17060]	29527	-0.156249	-0.517247	No
CLIP2	CAP-Gly domain containing linker protein 2 [Source:HGNC Symbol;Acc:HGNC:2586]	29979	-0.181971	-0.527582	No
WASF2	WASP family member 2 [Source:HGNC Symbol;Acc:HGNC:12733]	30393	-0.205232	-0.536798	No
ARHGDIA	Rho GDP dissociation inhibitor alpha [Source:HGNC Symbol;Acc:HGNC:678]	30503	-0.21441	-0.538202	No
WASL	WASP like actin nucleation promoting factor [Source:HGNC Symbol;Acc:HGNC:12735]	30524	-0.215974	-0.537326	No
PLEKHG2	pleckstrin homology and RhoGEF domain containing G2 [Source:HGNC Symbol;Acc:HGNC:29515]	30548	-0.217513	-0.536517	No
PPP4R2	protein phosphatase 4 regulatory subunit 2 [Source:HGNC Symbol;Acc:HGNC:18296]	30661	-0.223296	-0.53794	No
FARP1	FERM, ARH/RhoGEF and pleckstrin domain protein 1 [Source:HGNC Symbol;Acc:HGNC:3591]	30679	-0.224882	-0.53693	No
CSNK1D	casein kinase 1 delta [Source:HGNC Symbol;Acc:HGNC:2452]	30896	-0.240981	-0.540893	No
RALBP1	ralA binding protein 1 [Source:HGNC Symbol;Acc:HGNC:9841]	31222	-0.252344	-0.547562	No
TIAM1	TIAM Rac1 associated GEF 1 [Source:HGNC Symbol;Acc:HGNC:11805]	31293	-0.256863	-0.547699	No
NCK1	NCK adaptor protein 1 [Source:HGNC Symbol;Acc:HGNC:7664]	31390	-0.262258	-0.548464	No
ABL1	ABL proto-oncogene 1, non-receptor tyrosine kinase [Source:HGNC Symbol;Acc:HGNC:76]	31464	-0.267474	-0.548609	No
SPTBN1	spectrin beta, non-erythrocytic 1 [Source:HGNC Symbol;Acc:HGNC:11275]	31503	-0.269918	-0.547846	No
CEP192	centrosomal protein 192 [Source:HGNC Symbol;Acc:HGNC:25515]	31712	-0.286265	-0.551314	No
FLNA	filamin A [Source:HGNC Symbol;Acc:HGNC:3754]	32005	-0.311301	-0.556763	No
MYO1E	myosin IE [Source:HGNC Symbol;Acc:HGNC:7599]	32022	-0.312297	-0.555167	No
CDK5RAP2	CDK5 regulatory subunit associated protein 2 [Source:HGNC Symbol;Acc:HGNC:18672]	32098	-0.318249	-0.555037	No
DLG1	discs large MAGUK scaffold protein 1 [Source:HGNC Symbol;Acc:HGNC:2900]	32396	-0.341949	-0.560418	No
ARHGAP10	Rho GTPase activating protein 10 [Source:HGNC Symbol;Acc:HGNC:26099]	32497	-0.351867	-0.56071	No
GEMIN4	gem nuclear organelle associated protein 4 [Source:HGNC Symbol;Acc:HGNC:15717]	32672	-0.359777	-0.562838	No
RABGAP1	RAB GTPase activating protein 1 [Source:HGNC Symbol;Acc:HGNC:17155]	32865	-0.375147	-0.565328	No
CDC42	cell division cycle 42 [Source:HGNC Symbol;Acc:HGNC:1736]	32935	-0.381772	-0.564637	No
CENPJ	centromere protein J [Source:HGNC Symbol;Acc:HGNC:17272]	33170	-0.395541	-0.568067	No
STAU1	staufen double-stranded RNA binding protein 1 [Source:HGNC Symbol;Acc:HGNC:11370]	33234	-0.400501	-0.567103	No
CD2AP	CD2 associated protein [Source:HGNC Symbol;Acc:HGNC:14258]	33273	-0.404932	-0.565473	No
CAPZB	capping actin protein of muscle Z-line subunit beta [Source:HGNC Symbol;Acc:HGNC:1491]	33686	-0.413235	-0.573329	No
MAPRE1	microtubule associated protein RP/EB family member 1 [Source:HGNC Symbol;Acc:HGNC:6890]	33712	-0.415519	-0.5713	No
FSCN1	fascin actin-bundling protein 1 [Source:HGNC Symbol;Acc:HGNC:11148]	33793	-0.421885	-0.570632	No
PALLD	palladin, cytoskeletal associated protein [Source:HGNC Symbol;Acc:HGNC:17068]	33985	-0.440848	-0.572674	No
CEP131	centrosomal protein 131 [Source:HGNC Symbol;Acc:HGNC:29511]	34031	-0.446798	-0.570954	No
YWHAE	tyrosine 3-monooxygenase/tryptophan 5-monooxygenase activation protein epsilon [Source:HGNC Symbol;Acc:HGNC:12851]	34504	-0.467044	-0.579995	No
SMC3	structural maintenance of chromosomes 3 [Source:HGNC Symbol;Acc:HGNC:2468]	34717	-0.481485	-0.582312	No
ARHGAP29	Rho GTPase activating protein 29 [Source:HGNC Symbol;Acc:HGNC:30207]	34970	-0.489156	-0.5856	No
PXN	paxillin [Source:HGNC Symbol;Acc:HGNC:9718]	35000	-0.492099	-0.583181	No
CDC27	cell division cycle 27 [Source:HGNC Symbol;Acc:HGNC:1728]	35003	-0.492222	-0.580073	No
ARL8A	ADP ribosylation factor like GTPase 8A [Source:HGNC Symbol;Acc:HGNC:25192]	35445	-0.538776	-0.587862	Yes
RFC1	replication factor C subunit 1 [Source:HGNC Symbol;Acc:HGNC:9969]	35520	-0.546785	-0.58624	Yes
SUN2	Sad1 and UNC84 domain containing 2 [Source:HGNC Symbol;Acc:HGNC:14210]	35586	-0.55635	-0.584327	Yes
CNTROB	centrobin, centriole duplication and spindle assembly protein [Source:HGNC Symbol;Acc:HGNC:29616]	35592	-0.556647	-0.580882	Yes
OPHN1	oligophrenin 1 [Source:HGNC Symbol;Acc:HGNC:8148]	35697	-0.571722	-0.579865	Yes
SMC1A	structural maintenance of chromosomes 1A [Source:HGNC Symbol;Acc:HGNC:11111]	35745	-0.579207	-0.577346	Yes
EPB41L2	erythrocyte membrane protein band 4.1 like 2 [Source:HGNC Symbol;Acc:HGNC:3379]	35759	-0.581374	-0.573947	Yes
PDLIM5	PDZ and LIM domain 5 [Source:HGNC Symbol;Acc:HGNC:17468]	35763	-0.581856	-0.570289	Yes
CKAP5	cytoskeleton associated protein 5 [Source:HGNC Symbol;Acc:HGNC:28959]	35865	-0.600717	-0.569009	Yes
KIF1B	kinesin family member 1B [Source:HGNC Symbol;Acc:HGNC:16636]	35981	-0.621929	-0.567951	Yes
NET1	neuroepithelial cell transforming 1 [Source:HGNC Symbol;Acc:HGNC:14592]	36068	-0.633852	-0.566076	Yes
CEP72	centrosomal protein 72 [Source:HGNC Symbol;Acc:HGNC:25547]	36081	-0.635827	-0.562301	Yes
LLGL1	LLGL scribble cell polarity complex component 1 [Source:HGNC Symbol;Acc:HGNC:6628]	36261	-0.669216	-0.562571	Yes
ARHGAP5	Rho GTPase activating protein 5 [Source:HGNC Symbol;Acc:HGNC:675]	36409	-0.697974	-0.561841	Yes
ITSN1	intersectin 1 [Source:HGNC Symbol;Acc:HGNC:6183]	36501	-0.708019	-0.559617	Yes
EPB41	erythrocyte membrane protein band 4.1 [Source:HGNC Symbol;Acc:HGNC:3377]	36528	-0.714676	-0.555693	Yes
CLIP1	CAP-Gly domain containing linker protein 1 [Source:HGNC Symbol;Acc:HGNC:10461]	36654	-0.73988	-0.554133	Yes
AKAP13	A-kinase anchoring protein 13 [Source:HGNC Symbol;Acc:HGNC:371]	36870	-0.789938	-0.554546	Yes
SASS6	SAS-6 centriolar assembly protein [Source:HGNC Symbol;Acc:HGNC:25403]	36920	-0.802517	-0.550645	Yes
SMC4	structural maintenance of chromosomes 4 [Source:HGNC Symbol;Acc:HGNC:14013]	36930	-0.804791	-0.54571	Yes
RASAL2	RAS protein activator like 2 [Source:HGNC Symbol;Acc:HGNC:9874]	37032	-0.824902	-0.542991	Yes
MID1IP1	MID1 interacting protein 1 [Source:HGNC Symbol;Acc:HGNC:20715]	37093	-0.832871	-0.539176	Yes
ABR	ABR activator of RhoGEF and GTPase [Source:HGNC Symbol;Acc:HGNC:81]	37133	-0.841381	-0.53477	Yes
MARCKS	myristoylated alanine rich protein kinase C substrate [Source:HGNC Symbol;Acc:HGNC:6759]	37189	-0.857242	-0.530671	Yes
SEPTIN9	septin 9 [Source:HGNC Symbol;Acc:HGNC:7323]	37228	-0.865772	-0.526084	Yes
SAC3D1	SAC3 domain containing 1 [Source:HGNC Symbol;Acc:HGNC:30179]	37268	-0.876034	-0.521456	Yes
MYH9	myosin heavy chain 9 [Source:HGNC Symbol;Acc:HGNC:7579]	37387	-0.915354	-0.51859	Yes
ARF6	ADP ribosylation factor 6 [Source:HGNC Symbol;Acc:HGNC:659]	37493	-0.94428	-0.515208	Yes
RAPGEF5	Rap guanine nucleotide exchange factor 5 [Source:HGNC Symbol;Acc:HGNC:16862]	37533	-0.956106	-0.510066	Yes
PRC1	protein regulator of cytokinesis 1 [Source:HGNC Symbol;Acc:HGNC:9341]	37789	-1.0538	-0.509806	Yes
NUSAP1	nucleolar and spindle associated protein 1 [Source:HGNC Symbol;Acc:HGNC:18538]	37816	-1.06468	-0.503636	Yes
ACTN4	actinin alpha 4 [Source:HGNC Symbol;Acc:HGNC:166]	38104	-1.19317	-0.503298	Yes
KIF22	kinesin family member 22 [Source:HGNC Symbol;Acc:HGNC:6391]	38192	-1.24252	-0.497542	Yes
EZR	ezrin [Source:HGNC Symbol;Acc:HGNC:12691]	38335	-1.33562	-0.492591	Yes
DOCK2	dedicator of cytokinesis 2 [Source:HGNC Symbol;Acc:HGNC:2988]	38505	-1.46966	-0.487469	Yes
KNTC1	kinetochore associated 1 [Source:HGNC Symbol;Acc:HGNC:17255]	38514	-1.47935	-0.478178	Yes
INCENP	inner centromere protein [Source:HGNC Symbol;Acc:HGNC:6058]	38573	-1.52108	-0.469895	Yes
PCGF5	polycomb group ring finger 5 [Source:HGNC Symbol;Acc:HGNC:28264]	38602	-1.54191	-0.460712	Yes
KIF20B	kinesin family member 20B [Source:HGNC Symbol;Acc:HGNC:7212]	38665	-1.59297	-0.45207	Yes
FBXO5	F-box protein 5 [Source:HGNC Symbol;Acc:HGNC:13584]	38716	-1.64792	-0.442768	Yes
FLNB	filamin B [Source:HGNC Symbol;Acc:HGNC:3755]	38730	-1.66651	-0.432403	Yes
LMNB1	lamin B1 [Source:HGNC Symbol;Acc:HGNC:6637]	38755	-1.68796	-0.422182	Yes
BRCA2	BRCA2 DNA repair associated [Source:HGNC Symbol;Acc:HGNC:1101]	38805	-1.75779	-0.41215	Yes
ECT2	epithelial cell transforming 2 [Source:HGNC Symbol;Acc:HGNC:3155]	38858	-1.8383	-0.401677	Yes
CDC42EP4	CDC42 effector protein 4 [Source:HGNC Symbol;Acc:HGNC:17147]	38909	-1.90577	-0.390721	Yes
PLK1	polo like kinase 1 [Source:HGNC Symbol;Acc:HGNC:9077]	38917	-1.91065	-0.378636	Yes
TPX2	TPX2 microtubule nucleation factor [Source:HGNC Symbol;Acc:HGNC:1249]	38972	-1.96435	-0.367406	Yes
CDC42EP1	CDC42 effector protein 1 [Source:HGNC Symbol;Acc:HGNC:17014]	38982	-1.97182	-0.35498	Yes
SORBS2	sorbin and SH3 domain containing 2 [Source:HGNC Symbol;Acc:HGNC:24098]	38996	-2.00911	-0.342416	Yes
AURKA	aurora kinase A [Source:HGNC Symbol;Acc:HGNC:11393]	39017	-2.02445	-0.329933	Yes
NDC80	NDC80 kinetochore complex component [Source:HGNC Symbol;Acc:HGNC:16909]	39055	-2.09486	-0.317431	Yes
RACGAP1	Rac GTPase activating protein 1 [Source:HGNC Symbol;Acc:HGNC:9804]	39073	-2.11796	-0.304271	Yes
KIF11	kinesin family member 11 [Source:HGNC Symbol;Acc:HGNC:6388]	39118	-2.18365	-0.291378	Yes
KIF4A	kinesin family member 4A [Source:HGNC Symbol;Acc:HGNC:13339]	39128	-2.20755	-0.277439	Yes
DLGAP5	DLG associated protein 5 [Source:HGNC Symbol;Acc:HGNC:16864]	39173	-2.28832	-0.263875	Yes
CENPF	centromere protein F [Source:HGNC Symbol;Acc:HGNC:1857]	39184	-2.32667	-0.249196	Yes
TUBA4A	tubulin alpha 4a [Source:HGNC Symbol;Acc:HGNC:12407]	39188	-2.33493	-0.234287	Yes
KIF23	kinesin family member 23 [Source:HGNC Symbol;Acc:HGNC:6392]	39208	-2.36855	-0.219569	Yes
CENPE	centromere protein E [Source:HGNC Symbol;Acc:HGNC:1856]	39209	-2.36879	-0.204366	Yes
PIF1	PIF1 5'-to-3' DNA helicase [Source:HGNC Symbol;Acc:HGNC:26220]	39220	-2.38976	-0.189283	Yes
CCNB2	cyclin B2 [Source:HGNC Symbol;Acc:HGNC:1580]	39221	-2.39057	-0.17394	Yes
KIF15	kinesin family member 15 [Source:HGNC Symbol;Acc:HGNC:17273]	39224	-2.39518	-0.158618	Yes
ANLN	anillin actin binding protein [Source:HGNC Symbol;Acc:HGNC:14082]	39237	-2.43372	-0.143304	Yes
ESPL1	extra spindle pole bodies like 1, separase [Source:HGNC Symbol;Acc:HGNC:16856]	39244	-2.45041	-0.127729	Yes
KIF2C	kinesin family member 2C [Source:HGNC Symbol;Acc:HGNC:6393]	39246	-2.45539	-0.111995	Yes
BUB1	BUB1 mitotic checkpoint serine/threonine kinase [Source:HGNC Symbol;Acc:HGNC:1148]	39253	-2.46457	-0.0963302	Yes
TTK	TTK protein kinase [Source:HGNC Symbol;Acc:HGNC:12401]	39255	-2.48938	-0.0803783	Yes
BIRC5	baculoviral IAP repeat containing 5 [Source:HGNC Symbol;Acc:HGNC:593]	39260	-2.50548	-0.0643995	Yes
TOP2A	DNA topoisomerase II alpha [Source:HGNC Symbol;Acc:HGNC:11989]	39268	-2.52167	-0.0483933	Yes
NEK2	NIMA related kinase 2 [Source:HGNC Symbol;Acc:HGNC:7745]	39273	-2.5418	-0.0321815	Yes
CDK1	cyclin dependent kinase 1 [Source:HGNC Symbol;Acc:HGNC:1722]	39302	-2.62886	-0.0160229	Yes
SYNPO	synaptopodin [Source:HGNC Symbol;Acc:HGNC:30672]	39339	-2.90579	0.001709	Yes

## Sheet: Estrogen_Response_Late
SYMBOL	TITLE	RANK IN GENE LIST	RANK METRIC SCORE	RUNNING ES	CORE ENRICHMENT
CXCL14	C-X-C motif chemokine ligand 14 [Source:HGNC Symbol;Acc:HGNC:10640]	4	4.27602	0.0249295	No
KLF4	Kruppel like factor 4 [Source:HGNC Symbol;Acc:HGNC:6348]	140	2.5211	0.0362446	No
ID2	inhibitor of DNA binding 2 [Source:HGNC Symbol;Acc:HGNC:5361]	148	2.4895	0.0506394	No
NRIP1	nuclear receptor interacting protein 1 [Source:HGNC Symbol;Acc:HGNC:8001]	677	1.48106	0.0458424	No
MAPK13	mitogen-activated protein kinase 13 [Source:HGNC Symbol;Acc:HGNC:6875]	1019	1.26329	0.0445402	No
SOX3	SRY-box transcription factor 3 [Source:HGNC Symbol;Acc:HGNC:11199]	1034	1.2563	0.0515374	No
ALDH3A2	aldehyde dehydrogenase 3 family member A2 [Source:HGNC Symbol;Acc:HGNC:403]	1181	1.18393	0.0547443	No
LSR	lipolysis stimulated lipoprotein receptor [Source:HGNC Symbol;Acc:HGNC:29572]	1342	1.1213	0.0572273	No
KRT13	keratin 13 [Source:HGNC Symbol;Acc:HGNC:6415]	1397	1.0986	0.0622811	No
PDZK1	PDZ domain containing 1 [Source:HGNC Symbol;Acc:HGNC:8821]	1643	1.00759	0.0619306	No
S100A9	S100 calcium binding protein A9 [Source:HGNC Symbol;Acc:HGNC:10499]	1676	0.997515	0.0669538	No
ADD3	adducin 3 [Source:HGNC Symbol;Acc:HGNC:245]	1969	0.913357	0.0648529	No
PTGER3	prostaglandin E receptor 3 [Source:HGNC Symbol;Acc:HGNC:9595]	2119	0.887198	0.0662461	No
OVOL2	ovo like zinc finger 2 [Source:HGNC Symbol;Acc:HGNC:15804]	2259	0.8744	0.0678195	No
DUSP2	dual specificity phosphatase 2 [Source:HGNC Symbol;Acc:HGNC:3068]	2361	0.861656	0.0702875	No
TPBG	trophoblast glycoprotein [Source:HGNC Symbol;Acc:HGNC:12004]	2395	0.854101	0.0744457	No
CXCL12	C-X-C motif chemokine ligand 12 [Source:HGNC Symbol;Acc:HGNC:10672]	2578	0.817677	0.0745903	No
PTPN6	protein tyrosine phosphatase non-receptor type 6 [Source:HGNC Symbol;Acc:HGNC:9658]	3042	0.750528	0.0671747	No
KRT19	keratin 19 [Source:HGNC Symbol;Acc:HGNC:6436]	3189	0.728046	0.0677128	No
RPS6KA2	ribosomal protein S6 kinase A2 [Source:HGNC Symbol;Acc:HGNC:10431]	3376	0.69808	0.0670552	No
DHCR7	7-dehydrocholesterol reductase [Source:HGNC Symbol;Acc:HGNC:2860]	3703	0.649681	0.0625436	No
MDK	midkine [Source:HGNC Symbol;Acc:HGNC:6972]	3734	0.645738	0.0655585	No
NCOR2	nuclear receptor corepressor 2 [Source:HGNC Symbol;Acc:HGNC:7673]	3814	0.636568	0.06727	No
CHST8	carbohydrate sulfotransferase 8 [Source:HGNC Symbol;Acc:HGNC:15993]	3996	0.62982	0.0663404	No
AREG	amphiregulin [Source:HGNC Symbol;Acc:HGNC:651]	4070	0.62982	0.0681654	No
GPER1	G protein-coupled estrogen receptor 1 [Source:HGNC Symbol;Acc:HGNC:4485]	4146	0.618673	0.0698741	No
PLXNB1	plexin B1 [Source:HGNC Symbol;Acc:HGNC:9103]	4292	0.606256	0.0697248	No
HOMER2	homer scaffold protein 2 [Source:HGNC Symbol;Acc:HGNC:17513]	4350	0.599442	0.0717801	No
MEST	mesoderm specific transcript [Source:HGNC Symbol;Acc:HGNC:7028]	4540	0.576175	0.0703324	No
GJB3	gap junction protein beta 3 [Source:HGNC Symbol;Acc:HGNC:4285]	4561	0.573088	0.0731771	No
XRCC3	X-ray repair cross complementing 3 [Source:HGNC Symbol;Acc:HGNC:12830]	4739	0.550351	0.0718843	No
RAB31	RAB31, member RAS oncogene family [Source:HGNC Symbol;Acc:HGNC:9771]	4819	0.540473	0.0730332	No
ABHD2	abhydrolase domain containing 2, acylglycerol lipase [Source:HGNC Symbol;Acc:HGNC:18717]	4850	0.53689	0.075411	No
WFS1	wolframin ER transmembrane glycoprotein [Source:HGNC Symbol;Acc:HGNC:12762]	4982	0.525193	0.0751442	No
METTL3	methyltransferase like 3 [Source:HGNC Symbol;Acc:HGNC:17563]	5087	0.516674	0.0755162	No
PDCD4	programmed cell death 4 [Source:HGNC Symbol;Acc:HGNC:8763]	5337	0.495179	0.072064	No
TOB1	transducer of ERBB2, 1 [Source:HGNC Symbol;Acc:HGNC:11979]	5929	0.447488	0.0596097	No
GAL	galanin and GMAP prepropeptide [Source:HGNC Symbol;Acc:HGNC:4114]	5961	0.446445	0.0614325	No
TFPI2	tissue factor pathway inhibitor 2 [Source:HGNC Symbol;Acc:HGNC:11761]	6609	0.433363	0.0474672	No
CALCR	calcitonin receptor [Source:HGNC Symbol;Acc:HGNC:1440]	7554	0.384177	0.0256388	No
PAPSS2	3'-phosphoadenosine 5'-phosphosulfate synthase 2 [Source:HGNC Symbol;Acc:HGNC:8604]	8078	0.342423	0.0143039	No
BAG1	BAG cochaperone 1 [Source:HGNC Symbol;Acc:HGNC:937]	8100	0.341066	0.0157648	No
TST	thiosulfate sulfurtransferase [Source:HGNC Symbol;Acc:HGNC:12388]	8701	0.294823	0.00218733	No
NPY1R	neuropeptide Y receptor Y1 [Source:HGNC Symbol;Acc:HGNC:7956]	8794	0.288071	0.00152716	No
PCP4	Purkinje cell protein 4 [Source:HGNC Symbol;Acc:HGNC:8742]	9935	0.274586	-0.0259419	No
CACNA2D2	calcium voltage-gated channel auxiliary subunit alpha2delta 2 [Source:HGNC Symbol;Acc:HGNC:1400]	10275	0.249835	-0.0331258	No
SLC2A8	solute carrier family 2 member 8 [Source:HGNC Symbol;Acc:HGNC:13812]	10505	0.235511	-0.0375879	No
JAK2	Janus kinase 2 [Source:HGNC Symbol;Acc:HGNC:6192]	11087	0.196435	-0.0512568	No
NAB2	NGFI-A binding protein 2 [Source:HGNC Symbol;Acc:HGNC:7627]	11367	0.177599	-0.0573332	No
ARL3	ADP ribosylation factor like GTPase 3 [Source:HGNC Symbol;Acc:HGNC:694]	11667	0.158842	-0.0640295	No
CCN5	cellular communication network factor 5 [Source:HGNC Symbol;Acc:HGNC:12770]	12104	0.132501	-0.0743743	No
SFN	stratifin [Source:HGNC Symbol;Acc:HGNC:10773]	12437	0.112863	-0.0821815	No
PLAC1	placenta enriched 1 [Source:HGNC Symbol;Acc:HGNC:9044]	12509	0.108662	-0.0833563	No
IGSF1	immunoglobulin superfamily member 1 [Source:HGNC Symbol;Acc:HGNC:5948]	12527	0.107544	-0.0831604	No
AFF1	AF4/FMR2 family member 1 [Source:HGNC Symbol;Acc:HGNC:7135]	12586	0.103629	-0.0840331	No
CPE	carboxypeptidase E [Source:HGNC Symbol;Acc:HGNC:2303]	12620	0.102637	-0.0842739	No
TNNC1	troponin C1, slow skeletal and cardiac type [Source:HGNC Symbol;Acc:HGNC:11943]	13165	0.074034	-0.0977156	No
PLAAT3	phospholipase A and acyltransferase 3 [Source:HGNC Symbol;Acc:HGNC:17825]	13232	0.07007	-0.0989888	No
JAK1	Janus kinase 1 [Source:HGNC Symbol;Acc:HGNC:6190]	13840	0.0329825	-0.114278	No
KLK11	kallikrein related peptidase 11 [Source:HGNC Symbol;Acc:HGNC:6359]	16343	0	-0.178093	No
SLC27A2	solute carrier family 27 member 2 [Source:HGNC Symbol;Acc:HGNC:10996]	16611	0	-0.184903	No
TH	tyrosine hydroxylase [Source:HGNC Symbol;Acc:HGNC:11782]	18725	0	-0.238796	No
LTF	lactotransferrin [Source:HGNC Symbol;Acc:HGNC:6720]	20251	0	-0.277692	No
PGR	progesterone receptor [Source:HGNC Symbol;Acc:HGNC:8910]	20973	0	-0.296082	No
HMGCS2	3-hydroxy-3-methylglutaryl-CoA synthase 2 [Source:HGNC Symbol;Acc:HGNC:5008]	20989	0	-0.296465	No
TPSAB1	tryptase alpha/beta 1 [Source:HGNC Symbol;Acc:HGNC:12019]	24192	0	-0.378134	No
BATF	basic leucine zipper ATF-like transcription factor [Source:HGNC Symbol;Acc:HGNC:958]	26689	0	-0.441796	No
MAPT	microtubule associated protein tau [Source:HGNC Symbol;Acc:HGNC:6893]	27098	-0.0213079	-0.452077	No
RABEP1	rabaptin, RAB GTPase binding effector protein 1 [Source:HGNC Symbol;Acc:HGNC:17677]	27548	-0.0456934	-0.463262	No
SLC24A3	solute carrier family 24 member 3 [Source:HGNC Symbol;Acc:HGNC:10977]	27712	-0.0550305	-0.467097	No
PRKAR2B	protein kinase cAMP-dependent type II regulatory subunit beta [Source:HGNC Symbol;Acc:HGNC:9392]	27910	-0.0650268	-0.471741	No
IMPA2	inositol monophosphatase 2 [Source:HGNC Symbol;Acc:HGNC:6051]	28168	-0.0768989	-0.477846	No
SCUBE2	signal peptide, CUB domain and EGF like domain containing 2 [Source:HGNC Symbol;Acc:HGNC:30425]	28329	-0.0864237	-0.481421	No
SLC9A3R1	SLC9A3 regulator 1 [Source:HGNC Symbol;Acc:HGNC:11075]	28444	-0.0914605	-0.483793	No
LAMC2	laminin subunit gamma 2 [Source:HGNC Symbol;Acc:HGNC:6493]	28463	-0.0927006	-0.483709	No
FRK	fyn related Src family tyrosine kinase [Source:HGNC Symbol;Acc:HGNC:3955]	28875	-0.115676	-0.493515	No
COX6C	cytochrome c oxidase subunit 6C [Source:HGNC Symbol;Acc:HGNC:2285]	29042	-0.124569	-0.49702	No
NBL1	NBL1, DAN family BMP antagonist [Source:HGNC Symbol;Acc:HGNC:7650]	29189	-0.133609	-0.499962	No
GFUS	GDP-L-fucose synthase [Source:HGNC Symbol;Acc:HGNC:12390]	29773	-0.169355	-0.51384	No
FKBP4	FKBP prolyl isomerase 4 [Source:HGNC Symbol;Acc:HGNC:3720]	29797	-0.170754	-0.513427	No
CLIC3	chloride intracellular channel 3 [Source:HGNC Symbol;Acc:HGNC:2064]	30420	-0.207468	-0.528077	No
FARP1	FERM, ARH/RhoGEF and pleckstrin domain protein 1 [Source:HGNC Symbol;Acc:HGNC:3591]	30679	-0.224882	-0.533341	No
RAPGEFL1	Rap guanine nucleotide exchange factor like 1 [Source:HGNC Symbol;Acc:HGNC:17428]	30803	-0.234113	-0.535108	No
GLA	galactosidase alpha [Source:HGNC Symbol;Acc:HGNC:4296]	30834	-0.236712	-0.534487	No
AMFR	autocrine motility factor receptor [Source:HGNC Symbol;Acc:HGNC:463]	31215	-0.251616	-0.542706	No
FABP5	fatty acid binding protein 5 [Source:HGNC Symbol;Acc:HGNC:3560]	31274	-0.255197	-0.542692	No
TIAM1	TIAM Rac1 associated GEF 1 [Source:HGNC Symbol;Acc:HGNC:11805]	31293	-0.256863	-0.541647	No
FAM102A	family with sequence similarity 102 member A [Source:HGNC Symbol;Acc:HGNC:31419]	31496	-0.269272	-0.545223	No
UGDH	UDP-glucose 6-dehydrogenase [Source:HGNC Symbol;Acc:HGNC:12525]	31728	-0.287542	-0.549432	No
MOCS2	molybdenum cofactor synthesis 2 [Source:HGNC Symbol;Acc:HGNC:7193]	31890	-0.300875	-0.551777	No
LLGL2	LLGL scribble cell polarity complex component 2 [Source:HGNC Symbol;Acc:HGNC:6629]	32028	-0.312991	-0.553439	No
ETFB	electron transfer flavoprotein subunit beta [Source:HGNC Symbol;Acc:HGNC:3482]	32095	-0.31806	-0.55326	No
BCL2	BCL2 apoptosis regulator [Source:HGNC Symbol;Acc:HGNC:990]	32179	-0.324181	-0.55348	No
CD44	CD44 molecule (Indian blood group) [Source:HGNC Symbol;Acc:HGNC:1681]	32183	-0.324393	-0.551657	No
GALE	UDP-galactose-4-epimerase [Source:HGNC Symbol;Acc:HGNC:4116]	32392	-0.341685	-0.554962	No
OPN3	opsin 3 [Source:HGNC Symbol;Acc:HGNC:14007]	32471	-0.349924	-0.554903	No
NXT1	nuclear transport factor 2 like export factor 1 [Source:HGNC Symbol;Acc:HGNC:15913]	32500	-0.352179	-0.553556	No
KCNK5	potassium two pore domain channel subfamily K member 5 [Source:HGNC Symbol;Acc:HGNC:6280]	32501	-0.352193	-0.551494	No
OLFM1	olfactomedin 1 [Source:HGNC Symbol;Acc:HGNC:17187]	32772	-0.366894	-0.556233	No
SLC22A5	solute carrier family 22 member 5 [Source:HGNC Symbol;Acc:HGNC:10969]	32785	-0.368041	-0.554384	No
ANXA9	annexin A9 [Source:HGNC Symbol;Acc:HGNC:547]	32846	-0.374222	-0.553724	No
CISH	cytokine inducible SH2 containing protein [Source:HGNC Symbol;Acc:HGNC:1984]	32897	-0.378872	-0.552781	No
DNAJC12	DnaJ heat shock protein family (Hsp40) member C12 [Source:HGNC Symbol;Acc:HGNC:28908]	32909	-0.379958	-0.550838	No
PPIF	peptidylprolyl isomerase F [Source:HGNC Symbol;Acc:HGNC:9259]	32950	-0.383699	-0.549612	No
RNASEH2A	ribonuclease H2 subunit A [Source:HGNC Symbol;Acc:HGNC:18518]	33025	-0.387705	-0.54923	No
SLC26A2	solute carrier family 26 member 2 [Source:HGNC Symbol;Acc:HGNC:10994]	33230	-0.400216	-0.55209	No
DCXR	dicarbonyl and L-xylulose reductase [Source:HGNC Symbol;Acc:HGNC:18985]	33681	-0.412833	-0.561151	No
HPRT1	hypoxanthine phosphoribosyltransferase 1 [Source:HGNC Symbol;Acc:HGNC:5157]	33710	-0.415356	-0.559433	No
LARGE1	LARGE xylosyl- and glucuronyltransferase 1 [Source:HGNC Symbol;Acc:HGNC:6511]	33745	-0.418439	-0.557851	No
TJP3	tight junction protein 3 [Source:HGNC Symbol;Acc:HGNC:11829]	33781	-0.420856	-0.55628	No
ST14	ST14 transmembrane serine protease matriptase [Source:HGNC Symbol;Acc:HGNC:11344]	34190	-0.462639	-0.563978	No
TFF3	trefoil factor 3 [Source:HGNC Symbol;Acc:HGNC:11757]	34270	-0.464786	-0.563272	No
PERP	p53 apoptosis effector related to PMP22 [Source:HGNC Symbol;Acc:HGNC:17637]	34326	-0.464786	-0.561954	No
ASCL1	achaete-scute family bHLH transcription factor 1 [Source:HGNC Symbol;Acc:HGNC:738]	34409	-0.464786	-0.561325	No
DHRS2	dehydrogenase/reductase 2 [Source:HGNC Symbol;Acc:HGNC:18349]	34485	-0.465633	-0.560512	No
TFF1	trefoil factor 1 [Source:HGNC Symbol;Acc:HGNC:11755]	34789	-0.484889	-0.565402	No
DYNLT3	dynein light chain Tctex-type 3 [Source:HGNC Symbol;Acc:HGNC:11694]	35039	-0.495715	-0.568851	No
UNC13B	unc-13 homolog B [Source:HGNC Symbol;Acc:HGNC:12566]	35279	-0.520188	-0.571901	No
FOXC1	forkhead box C1 [Source:HGNC Symbol;Acc:HGNC:3800]	35589	-0.556452	-0.576525	No
FKBP5	FKBP prolyl isomerase 5 [Source:HGNC Symbol;Acc:HGNC:3721]	35790	-0.586609	-0.578192	Yes
KLK10	kallikrein related peptidase 10 [Source:HGNC Symbol;Acc:HGNC:6358]	35849	-0.597727	-0.576173	Yes
ISG20	interferon stimulated exonuclease gene 20 [Source:HGNC Symbol;Acc:HGNC:6130]	36030	-0.627404	-0.577091	Yes
XBP1	X-box binding protein 1 [Source:HGNC Symbol;Acc:HGNC:12801]	36048	-0.629609	-0.573839	Yes
ATP2B4	ATPase plasma membrane Ca2+ transporting 4 [Source:HGNC Symbol;Acc:HGNC:817]	36049	-0.62962	-0.570153	Yes
RET	ret proto-oncogene [Source:HGNC Symbol;Acc:HGNC:9967]	36272	-0.670433	-0.571891	Yes
TPD52L1	TPD52 like 1 [Source:HGNC Symbol;Acc:HGNC:12006]	36325	-0.680952	-0.569231	Yes
CYP26B1	cytochrome P450 family 26 subfamily B member 1 [Source:HGNC Symbol;Acc:HGNC:20581]	36410	-0.698114	-0.567287	Yes
PKP3	plakophilin 3 [Source:HGNC Symbol;Acc:HGNC:9025]	36469	-0.706186	-0.564632	Yes
ABCA3	ATP binding cassette subfamily A member 3 [Source:HGNC Symbol;Acc:HGNC:33]	36704	-0.747386	-0.566225	Yes
PRSS23	serine protease 23 [Source:HGNC Symbol;Acc:HGNC:14370]	36733	-0.754986	-0.56252	Yes
SIAH2	siah E3 ubiquitin protein ligase 2 [Source:HGNC Symbol;Acc:HGNC:10858]	36872	-0.790858	-0.56141	Yes
DLG5	discs large MAGUK scaffold protein 5 [Source:HGNC Symbol;Acc:HGNC:2904]	37111	-0.836046	-0.562586	Yes
SLC29A1	solute carrier family 29 member 1 (Augustine blood group) [Source:HGNC Symbol;Acc:HGNC:11003]	37137	-0.841956	-0.558295	Yes
IL6ST	interleukin 6 signal transducer [Source:HGNC Symbol;Acc:HGNC:6021]	37224	-0.865201	-0.555424	Yes
SORD	sorbitol dehydrogenase [Source:HGNC Symbol;Acc:HGNC:11184]	37243	-0.869208	-0.550794	Yes
CA2	carbonic anhydrase 2 [Source:HGNC Symbol;Acc:HGNC:1373]	37265	-0.874931	-0.546208	Yes
ELOVL5	ELOVL fatty acid elongase 5 [Source:HGNC Symbol;Acc:HGNC:21308]	37278	-0.878399	-0.541372	Yes
FOS	Fos proto-oncogene, AP-1 transcription factor subunit [Source:HGNC Symbol;Acc:HGNC:3796]	37304	-0.887981	-0.536812	Yes
CKB	creatine kinase B [Source:HGNC Symbol;Acc:HGNC:1991]	37484	-0.941616	-0.535865	Yes
SNX10	sorting nexin 10 [Source:HGNC Symbol;Acc:HGNC:14974]	37587	-0.972069	-0.532776	Yes
SERPINA1	serpin family A member 1 [Source:HGNC Symbol;Acc:HGNC:8941]	37603	-0.979478	-0.527425	Yes
BTG3	BTG anti-proliferation factor 3 [Source:HGNC Symbol;Acc:HGNC:1132]	37657	-1.00241	-0.522909	Yes
HSPA4L	heat shock protein family A (Hsp70) member 4 like [Source:HGNC Symbol;Acc:HGNC:17041]	37679	-1.01387	-0.517509	Yes
MYOF	myoferlin [Source:HGNC Symbol;Acc:HGNC:3656]	37680	-1.01408	-0.511573	Yes
CYP4F11	cytochrome P450 family 4 subfamily F member 11 [Source:HGNC Symbol;Acc:HGNC:13265]	37689	-1.01629	-0.505828	Yes
FDFT1	farnesyl-diphosphate farnesyltransferase 1 [Source:HGNC Symbol;Acc:HGNC:3629]	37695	-1.01819	-0.499995	Yes
TSPAN13	tetraspanin 13 [Source:HGNC Symbol;Acc:HGNC:21643]	37762	-1.04539	-0.495559	Yes
ITPK1	inositol-tetrakisphosphate 1-kinase [Source:HGNC Symbol;Acc:HGNC:6177]	37848	-1.07567	-0.49143	Yes
HSPB8	heat shock protein family B (small) member 8 [Source:HGNC Symbol;Acc:HGNC:30171]	37849	-1.0761	-0.48513	Yes
SULT2B1	sulfotransferase family 2B member 1 [Source:HGNC Symbol;Acc:HGNC:11459]	37882	-1.09249	-0.479551	Yes
CHPT1	choline phosphotransferase 1 [Source:HGNC Symbol;Acc:HGNC:17852]	37913	-1.1051	-0.473847	Yes
ALDH3B1	aldehyde dehydrogenase 3 family member B1 [Source:HGNC Symbol;Acc:HGNC:410]	37921	-1.10845	-0.467537	Yes
RBBP8	RB binding protein 8, endonuclease [Source:HGNC Symbol;Acc:HGNC:9891]	37942	-1.11583	-0.461515	Yes
BLVRB	biliverdin reductase B [Source:HGNC Symbol;Acc:HGNC:1063]	37963	-1.12527	-0.455438	Yes
SCARB1	scavenger receptor class B member 1 [Source:HGNC Symbol;Acc:HGNC:1664]	37978	-1.133	-0.449162	Yes
ST6GALNAC2	ST6 N-acetylgalactosaminide alpha-2,6-sialyltransferase 2 [Source:HGNC Symbol;Acc:HGNC:10867]	37999	-1.14327	-0.44298	Yes
SGK1	serum/glucocorticoid regulated kinase 1 [Source:HGNC Symbol;Acc:HGNC:10810]	38236	-1.26544	-0.441591	Yes
EGR3	early growth response 3 [Source:HGNC Symbol;Acc:HGNC:3240]	38246	-1.27753	-0.434342	Yes
PRLR	prolactin receptor [Source:HGNC Symbol;Acc:HGNC:9446]	38284	-1.29744	-0.427691	Yes
IDH2	isocitrate dehydrogenase (NADP(+)) 2 [Source:HGNC Symbol;Acc:HGNC:5383]	38367	-1.34795	-0.421892	Yes
TMPRSS3	transmembrane serine protease 3 [Source:HGNC Symbol;Acc:HGNC:11877]	38428	-1.40178	-0.415216	Yes
HR	HR lysine demethylase and nuclear receptor corepressor [Source:HGNC Symbol;Acc:HGNC:5172]	38439	-1.41076	-0.407213	Yes
TFAP2C	transcription factor AP-2 gamma [Source:HGNC Symbol;Acc:HGNC:11744]	38450	-1.42116	-0.399148	Yes
IL17RB	interleukin 17 receptor B [Source:HGNC Symbol;Acc:HGNC:18015]	38457	-1.43025	-0.390929	Yes
CCND1	cyclin D1 [Source:HGNC Symbol;Acc:HGNC:1582]	38482	-1.45099	-0.383047	Yes
SLC16A1	solute carrier family 16 member 1 [Source:HGNC Symbol;Acc:HGNC:10922]	38489	-1.45515	-0.374682	Yes
MYB	MYB proto-oncogene, transcription factor [Source:HGNC Symbol;Acc:HGNC:7545]	38524	-1.4843	-0.36686	Yes
CELSR2	cadherin EGF LAG seven-pass G-type receptor 2 [Source:HGNC Symbol;Acc:HGNC:3231]	38564	-1.51212	-0.359003	Yes
TRIM29	tripartite motif containing 29 [Source:HGNC Symbol;Acc:HGNC:17274]	38584	-1.5304	-0.350528	Yes
STIL	STIL centriolar assembly protein [Source:HGNC Symbol;Acc:HGNC:10879]	38636	-1.56738	-0.342654	Yes
CDH1	cadherin 1 [Source:HGNC Symbol;Acc:HGNC:1748]	38637	-1.56858	-0.333471	Yes
GINS2	GINS complex subunit 2 [Source:HGNC Symbol;Acc:HGNC:24575]	38638	-1.56878	-0.324288	Yes
PDLIM3	PDZ and LIM domain 3 [Source:HGNC Symbol;Acc:HGNC:20767]	38659	-1.5871	-0.315507	Yes
SCNN1A	sodium channel epithelial 1 subunit alpha [Source:HGNC Symbol;Acc:HGNC:10599]	38691	-1.61886	-0.306821	Yes
ZFP36	ZFP36 ring finger protein [Source:HGNC Symbol;Acc:HGNC:12862]	38704	-1.62917	-0.29759	Yes
FLNB	filamin B [Source:HGNC Symbol;Acc:HGNC:3755]	38730	-1.66651	-0.288472	Yes
CCNA1	cyclin A1 [Source:HGNC Symbol;Acc:HGNC:1577]	38739	-1.67556	-0.278868	Yes
IGFBP4	insulin like growth factor binding protein 4 [Source:HGNC Symbol;Acc:HGNC:5473]	38748	-1.68365	-0.269216	Yes
MICB	MHC class I polypeptide-related sequence B [Source:HGNC Symbol;Acc:HGNC:7091]	38768	-1.70907	-0.259696	Yes
ASS1	argininosuccinate synthase 1 [Source:HGNC Symbol;Acc:HGNC:758]	38815	-1.76994	-0.250508	Yes
DNAJC1	DnaJ heat shock protein family (Hsp40) member C1 [Source:HGNC Symbol;Acc:HGNC:20090]	38838	-1.80987	-0.240474	Yes
CD9	CD9 molecule [Source:HGNC Symbol;Acc:HGNC:1709]	38840	-1.81398	-0.229881	Yes
CAV1	caveolin 1 [Source:HGNC Symbol;Acc:HGNC:1527]	38861	-1.84177	-0.219609	Yes
SEMA3B	semaphorin 3B [Source:HGNC Symbol;Acc:HGNC:10724]	38867	-1.84956	-0.20891	Yes
FGFR3	fibroblast growth factor receptor 3 [Source:HGNC Symbol;Acc:HGNC:3690]	38883	-1.86571	-0.198371	Yes
ACOX2	acyl-CoA oxidase 2 [Source:HGNC Symbol;Acc:HGNC:120]	38897	-1.88705	-0.187655	Yes
CDC20	cell division cycle 20 [Source:HGNC Symbol;Acc:HGNC:1723]	38912	-1.90604	-0.176855	Yes
CA12	carbonic anhydrase 12 [Source:HGNC Symbol;Acc:HGNC:1371]	38941	-1.93774	-0.166225	Yes
PTGES	prostaglandin E synthase [Source:HGNC Symbol;Acc:HGNC:9599]	39023	-2.03529	-0.156377	Yes
EMP2	epithelial membrane protein 2 [Source:HGNC Symbol;Acc:HGNC:3334]	39069	-2.11252	-0.145158	Yes
SLC7A5	solute carrier family 7 member 5 [Source:HGNC Symbol;Acc:HGNC:11063]	39089	-2.13744	-0.13313	Yes
PLK4	polo like kinase 4 [Source:HGNC Symbol;Acc:HGNC:11397]	39152	-2.23891	-0.121605	Yes
KIF20A	kinesin family member 20A [Source:HGNC Symbol;Acc:HGNC:9787]	39161	-2.25883	-0.108586	Yes
NMU	neuromedin U [Source:HGNC Symbol;Acc:HGNC:7859]	39215	-2.37688	-0.0960241	Yes
CDC6	cell division cycle 6 [Source:HGNC Symbol;Acc:HGNC:1744]	39247	-2.45604	-0.0824373	Yes
SERPINA3	serpin family A member 3 [Source:HGNC Symbol;Acc:HGNC:16]	39248	-2.45712	-0.0680535	Yes
TOP2A	DNA topoisomerase II alpha [Source:HGNC Symbol;Acc:HGNC:11989]	39268	-2.52167	-0.0537764	Yes
AGR2	anterior gradient 2, protein disulphide isomerase family member [Source:HGNC Symbol;Acc:HGNC:328]	39309	-2.66573	-0.0391916	Yes
SLC1A4	solute carrier family 1 member 4 [Source:HGNC Symbol;Acc:HGNC:10942]	39376	-3.30746	-0.0215134	Yes
SERPINA5	serpin family A member 5 [Source:HGNC Symbol;Acc:HGNC:8723]	39397	-3.80141	0.000229661	Yes

[truncated: 5 more sheets: Oxidative_phosphorylation, UV_Response_Up, Cholesterol, INFLAMMATORY_RESPONSE, INTERFERON_ALPHA_RESPONSE]
